# Supplementary material
Source: HighWire-hosted journal article supplement (doi:10.1101/rna.079848.123)
Supplement: Supplemental_Fig_S2.pdf [file Supplemental_Fig_S2.pdf]

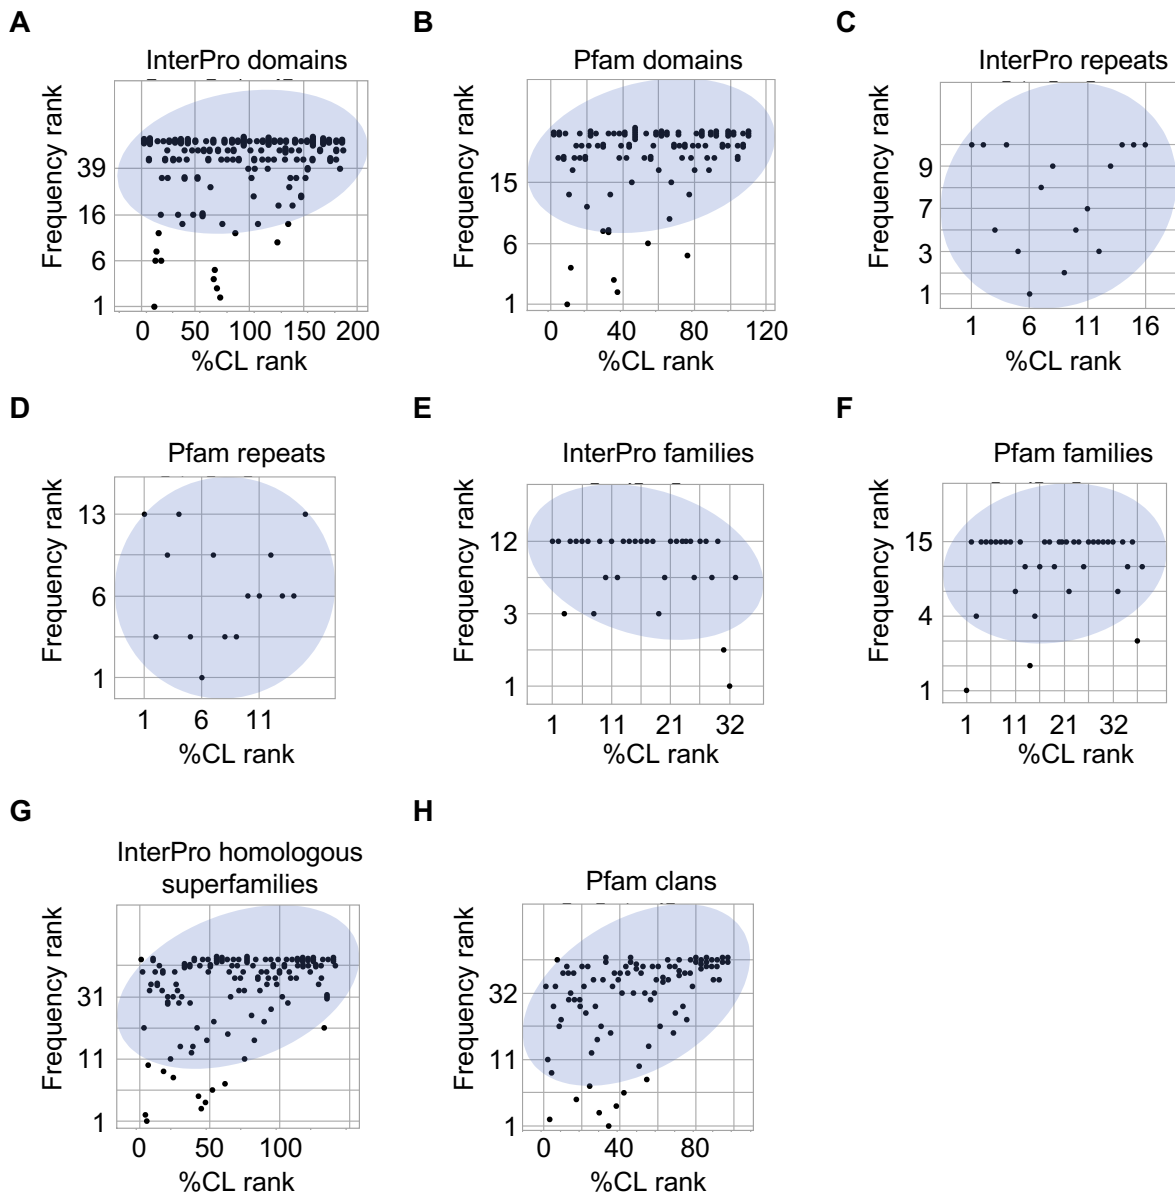

**Figure S2.** Frequency vs %CL ranking of InterPro and Pfam protein features and classifications. (A–H), Analytical summary: protein-specific UV-crosslinking efficiencies were estimated using protein abundances generated by LC-MS/MS analysis of input (total protein) and LEAP-RBP (cIRNP) fractions isolated from DMSO-treated HeLa cells ( $n = 3$  biologically independent replicates) and protein *S/N* ratios estimated by SILAC LC-MS/MS analysis of LEAP-RBP (cIRNP) fractions isolated from pooled cellular samples containing UV-crosslinked and non-crosslinked HeLa cells [25]. InterPro and Pfam IDs were mapped to assigned UniProt IDs using the Retrieve/ID mapping tool feature on the UniProt website (Supplemental Table S2). InterPro domains (A), Pfam domains (B), InterPro repeats (C), Pfam repeats (D), InterPro families (E), Pfam families (F), InterPro homologous superfamilies (G), and Pfam clans (H) mapped to 3 or more candidate RBPs containing UV-crosslinking efficiencies were ranked according to frequency or the average %CL of candidate RBPs and analyzed by Spearman’s rank correlation test. Summary of statistical test results included as part corresponding Source Data in the provided Source Data file. Complete list of %CL ranked InterPro and Pfam IDs, including those mapped to less than 3 candidate RBPs containing estimated UV-crosslinking efficiencies, were included as part of Supplemental Table S3.
