# Supplementary material
Source: HighWire-hosted journal article supplement (doi:10.1101/rna.079848.123)
Supplement: Supplemental_Source_Data.xlsx [file Supplemental_Source_Data.xlsx]

## Sheet: Figure 3B
Figure 3B
Complete list of candidate RBPs with estimated UV-crosslinking efficiencies included as part of Supplemental Table S2.
Complete MS datasets from SILAC LC-MS/MS analysis of clRNP fractions and LC-MS/MS analysis of input and clRNP fractions included as part of Supplemental Table S1 [Kristofich and Nicchitta, 2023]; see referenced study for additional information on sample prep, SILAC or non-SILAC LC-MS/MS analysis, and data processing.
Estimated S/N ratios for candidate RBPs (i.e., those displaying significant UV-enrichment) which do not contain at least 2 unique peptide matches were not used for estimation of protein-specific UV-crosslinking efficiencies.
The following corresponds to the example shown in Figure 3B. Equations used to calculate values are provided underneath the result, remove " to activate formula.
	Figure 3B. Left bar chart.
	(%TPO)clRNP	S/N
RBP A	1	4
S/N ratio of RBP A represents the ratio of RNA-bound (S) to unbound counterparts (N).
% RNA-bound can be calculated by dividing S/N ratio with S/N + 1.
	Figure 3B. Line graph, intercept point.
	% RNA-bound
RBP A	80
	"=(C10/(C10+1))*100
RNA-bound abundance (%TPS) of RBP A in LEAP-RBP fractions can be estimated by multiplying observed abundance (%TP or %TPO) of RBP A in LEAP-RBP fractions with % RNA-bound expressed as a fraction (i.e., out of 1).
			Figure 3B. Left stacked bar chart.
	Fraction RNA-bound	(%TPO)clRNP	(%TPS)clRNP	(%TPN)clRNP
RBP A	0.8	1	0.8	0.2
	"=B16/100		"=B22*C22	"=C22-D22
Protein UV-crosslinking efficiency is calculated by dividing protein yield (µg protein/% fraction) of clRNP fractions by the protein yield of input fractions * 100.
RNA-bound abundance of RBP A in input fractions can be estimated by multipying the RNA-bound abundance of RBP A in clRNP fractions with protein UV-crosslinking efficiency expressed as a fraction (i.e., out of 1).
	Protein %CL	Fraction of protein in starting sample that is UV-crosslinked to RNA
Starting sample	10	0.1
		"=B29/100
	(%TPS)clRNP	(%TPS)input
RBP A	0.8	0.08
		"=C29*B33
UV-crosslinking efficiency of RBP A can be estimated by dividing (%TPS)input by (%TPO)input and expressed as a percentage (* 100).
	(%TPO)input	UV-crosslinking efficiency
RBP A	0.16	50
		"=(C33/B39)*100
For the stacked bar chart in Figure 3B, RNA-bound (%TPS) and free (%TPN) RBP A contributions towards total protein in the input sample is shown.
	Figure 3B. Right stacked bar chart.
	(%TPN)input	(%TPS)input
RBP A	0.08	0.08
	"=B39-C33
For practical purposes, some of the calculations above can be simplified to give the equation below.
UV-crosslinking efficiency of RBP A (%) = ((%TPS)clRNP * protein %CL))/(%TP)input
	50 = 0.8 * 10/ 0.16
Summary of calculated metrics.
Protein UV-crosslinking efficiency (%):	5
	Input sample	clRNP fraction
Protein yield (µg protein/% fraction):	1	0.1
S/N of RBP A:	0.67	4
%TP of RBP A:	0.1	1
%TPS of RBP A:	0.04	0.8
UV-crosslinking efficiency (%) of RBP A:	40
	Input sample	clRNP fraction
Log2(S/N) of RBP A:	-0.577767	2
Full simplified equation for calculating %CL of RBP A using its observed abundance in input and clRNP fractions and displayed log2(S/N) ratio is shown below.
	40
	"=((((2^C69)/((2^C69)+1))*C63)*B58)/B63

## Sheet: Figure 4A
Figure 4A
Complete list of candidate RBPs with estimated UV-crosslinking efficiencies included as part of Supplementary Table 2. GO-annotations were exported from PANTHER V17.0 (Thomas et al., 2003) and made available in Supplemental Table S5.
Complete MS datasets from SILAC LC-MS/MS analysis of clRNP fractions and LC-MS/MS analysis of input and clRNP fractions included as part of Supplemental Table S1 [Kristofich and Nicchitta, 2023]; see referenced study for additional information on sample prep, SILAC or non-SILAC LC-MS/MS analysis, and data processing.
Estimated S/N ratios for candidate RBPs (i.e., those displaying significant UV-enrichment) which do not contain at least 2 unique peptide matches were not used for estimation of protein-specific UV-crosslinking efficiencies. Proteins with pseudo-log2(S/N) ratios of 10 were excluded from Figure 4A–D.
Log10 normalization of protein UV-crosslinking efficiencies and abundances was performed using the average %CL and %TP values of n = 3 biologically independent replicates respectively.
Figure 4A. Scatterplot, GO-annotated RBPs.						Figure 4A. Scatterplot, other.								Linear regression performed using the Line Of Fit feature available on JMP Pro 17.0 with the following settings, Fit: Polynomial; Degree: Linear; Confidence: Fit.
Assigned UniProt ID	Primary gene name	Protein name	Log10(%CL)	(log10(%TP))clRNP		Assigned UniProt ID	Primary gene name	Protein name	Log10(%CL)	(log10(%TP))clRNP
P09651	HNRNPA1	Heterogeneous nuclear ribonucleoprotein A1, hnRNP A1, Helix-destabilizing protein, Single-strand RNA-binding protein, hnRNP core protein A1	0.780204	0.521748		Q10713	PMPCA	Mitochondrial-processing peptidase subunit alpha, Alpha-MPP, Inactive zinc metalloprotease alpha, P-55	-0.105502	-1.35515				Test Type	Group (series)	Independent variable(s)	Dependent variable(s)	Statistical test results
P19338	NCL	Nucleolin, Protein C23	0.894285	0.891633		Q9BQC6	MRPL57	Ribosomal protein 63, mitochondrial, hMRP63, Mitochondrial large ribosomal subunit protein mL63, Mitochondrial ribosomal protein 63, Mitochondrial ribosomal protein L57	0.584513	-2.71385				Linear Regression	GO-annotated RBPs	Protein-specific UV-crosslinking efficiency, log10(%CL).	Observed protein abundance in clRNP fractions, log10(%TPO)clRNP.	F(1, 764) = 270.39, p < .001
O14979	HNRNPDL	Heterogeneous nuclear ribonucleoprotein D-like, hnRNP D-like, hnRNP DL, AU-rich element RNA-binding factor, JKT41-binding protein, Protein laAUF1	0.860979	-0.799581		Q9BVS4	RIOK2	Serine/threonine-protein kinase RIO2, 2.7.11.1, RIO kinase 2	0.67769	-1.39576				Linear Regression	Other	Protein-specific UV-crosslinking efficiency, log10(%CL).	Observed protein abundance in clRNP fractions, log10(%TPO)clRNP.	F(1, 296) = 10.92, p = .001
P15880	RPS2	40S ribosomal protein S2, 40S ribosomal protein S4, Protein LLRep3, Small ribosomal subunit protein uS5	1.25139	0.641294		Q96GA3	LTV1	Protein LTV1 homolog	0.118277	-2.55565
P51991	HNRNPA3	Heterogeneous nuclear ribonucleoprotein A3, hnRNP A3	0.750179	-0.163773		Q9H8Y5	ANKZF1	Ankyrin repeat and zinc finger domain-containing protein 1, Zinc finger protein 744	-0.0223608	-3.20658
P46777	RPL5	60S ribosomal protein L5, Large ribosomal subunit protein uL18	1.0161	0.438827		Q9ULX3	NOB1	RNA-binding protein NOB1, 3.1.-.-, Phosphorylation regulatory protein HP-10, Protein ART-4	0.222375	-1.79705
P62917	RPL8	60S ribosomal protein L8, Large ribosomal subunit protein uL2	1.12365	0.551261		P30419	NMT1	Glycylpeptide N-tetradecanoyltransferase 1, 2.3.1.97, Myristoyl-CoA:protein N-myristoyltransferase 1, HsNMT1, NMT 1, Type I N-myristoyltransferase, Peptide N-myristoyltransferase 1, Protein-lysine myristoyltransferase NMT1, 2.3.1.-	-0.0931814	-2.14441
Q13148	TARDBP	TAR DNA-binding protein 43, TDP-43	1.52787	-0.0126426		Q13057	COASY	Bifunctional coenzyme A synthase, CoA synthase, NBP, POV-2, Phosphopantetheine adenylyltransferase, 2.7.7.3, Dephospho-CoA pyrophosphorylase, Pantetheine-phosphate adenylyltransferase, PPAT, Dephospho-CoA kinase, DPCK, 2.7.1.24, Dephosphocoenzyme A kinase, DPCOAK	0.524167	-1.3986
Q15717	ELAVL1	ELAV-like protein 1, Hu-antigen R, HuR	1.66172	0.444579		P26641	EEF1G	Elongation factor 1-gamma, EF-1-gamma, eEF-1B gamma	-1.06392	-1.80759
P22626	HNRNPA2B1	Heterogeneous nuclear ribonucleoproteins A2/B1, hnRNP A2/B1	0.931607	0.601172		P32754	HPD	4-hydroxyphenylpyruvate dioxygenase, 1.13.11.27, 4-hydroxyphenylpyruvic acid oxidase, 4HPPD, HPD, HPPDase	-1.32874	-2.71924
P61978	HNRNPK	Heterogeneous nuclear ribonucleoprotein K, hnRNP K, Transformation up-regulated nuclear protein, TUNP	0.653256	-0.0915099		Q9HC35	EML4	Echinoderm microtubule-associated protein-like 4, EMAP-4, Restrictedly overexpressed proliferation-associated protein, Ropp 120	-0.368658	-2.38779
P38159	RBMX	RNA-binding motif protein, X chromosome, Glycoprotein p43, Heterogeneous nuclear ribonucleoprotein G, hnRNP G	0.641992	-0.344525		Q9NVU7	SDAD1	Protein SDA1 homolog, Nucleolar protein 130, SDA1 domain-containing protein 1, hSDA	0.460705	-2.17869
Q92804	TAF15	TATA-binding protein-associated factor 2N, 68 kDa TATA-binding protein-associated factor, TAF(II)68, TAFII68, RNA-binding protein 56	0.872205	-0.976834		Q92576	PHF3	PHD finger protein 3	0.545638	-2.86446
P52272	HNRNPM	Heterogeneous nuclear ribonucleoprotein M, hnRNP M	1.2933	0.745983		Q13123	IK	Protein Red, Cytokine IK, IK factor, Protein RER	0.256274	-1.73744
P16989	YBX3	Y-box-binding protein 3, Cold shock domain-containing protein A, DNA-binding protein A, Single-strand DNA-binding protein NF-GMB	0.959988	-0.313515		P48651	PTDSS1	Phosphatidylserine synthase 1, PSS-1, PtdSer synthase 1, 2.7.8.29, Serine-exchange enzyme I	0.0347665	-2.81691
P49207	RPL34	60S ribosomal protein L34, Large ribosomal subunit protein eL34	0.739255	-0.299792		Q9C0C2	TNKS1BP1	182 kDa tankyrase-1-binding protein	-0.136899	-2.86575
Q07666	KHDRBS1	KH domain-containing, RNA-binding, signal transduction-associated protein 1, GAP-associated tyrosine phosphoprotein p62, Src-associated in mitosis 68 kDa protein, Sam68, p21 Ras GTPase-activating protein-associated p62, p68	0.823197	-0.787603		O75822	EIF3J	Eukaryotic translation initiation factor 3 subunit J, eIF3j, Eukaryotic translation initiation factor 3 subunit 1, eIF-3-alpha, eIF3 p35	-0.28613	-2.01989
Q00577	PURA	Transcriptional activator protein Pur-alpha, Purine-rich single-stranded DNA-binding protein alpha	0.865046	-1.58942		P52732	KIF11	Kinesin-like protein KIF11, Kinesin-like protein 1, Kinesin-like spindle protein HKSP, Kinesin-related motor protein Eg5, Thyroid receptor-interacting protein 5, TR-interacting protein 5, TRIP-5	-0.72885	-3.36709
P23246	SFPQ	Splicing factor, proline- and glutamine-rich, 100 kDa DNA-pairing protein, hPOMp100, DNA-binding p52/p100 complex, 100 kDa subunit, Polypyrimidine tract-binding protein-associated-splicing factor, PSF, PTB-associated-splicing factor	1.06438	0.246022		P42166	TMPO	Lamina-associated polypeptide 2, isoform alpha, Thymopoietin isoform alpha, TP alpha, Thymopoietin-related peptide isoform alpha, TPRP isoform alpha	-1.24743	-2.76375
P47914	RPL29	60S ribosomal protein L29, Cell surface heparin-binding protein HIP, Large ribosomal subunit protein eL29	0.664064	-0.54822		Q9H089	LSG1	Large subunit GTPase 1 homolog, hLsg1, 3.6.1.-	-0.0396717	-2.83676
P52597	HNRNPF	Heterogeneous nuclear ribonucleoprotein F, hnRNP F, Nucleolin-like protein mcs94-1	1.17422	0.024097		Q9NWT1	PAK1IP1	p21-activated protein kinase-interacting protein 1, PAK/PLC-interacting protein 1, hPIP1, PAK1-interacting protein 1, WD repeat-containing protein 84	-0.930328	-3.06079
P83731	RPL24	60S ribosomal protein L24, 60S ribosomal protein L30, Large ribosomal subunit protein eL24	0.313881	-0.705436		Q9Y6K0	CEPT1	Choline/ethanolaminephosphotransferase 1, hCEPT1, 2.7.8.1, 2.7.8.2, 1-alkenyl-2-acylglycerol choline phosphotransferase, 2.7.8.22	0.0670129	-3.01316
Q9UKM9	RALY	RNA-binding protein Raly, Autoantigen p542, Heterogeneous nuclear ribonucleoprotein C-like 2, hnRNP core protein C-like 2, hnRNP associated with lethal yellow protein homolog	1.31076	-0.0607417		P40222	TXLNA	Alpha-taxilin	-0.833738	-2.74293
Q8NC51	SERBP1	Plasminogen activator inhibitor 1 RNA-binding protein, PAI1 RNA-binding protein 1, PAI-RBP1, SERPINE1 mRNA-binding protein 1	0.686732	0.0183681		Q9Y295	DRG1	Developmentally-regulated GTP-binding protein 1, DRG-1, Neural precursor cell expressed developmentally down-regulated protein 3, NEDD-3, Translation factor GTPase DRG1, TRAFAC GTPase DRG1, 3.6.5.-	-0.262942	-2.32567
Q96EP5	DAZAP1	DAZ-associated protein 1, Deleted in azoospermia-associated protein 1	0.976306	-0.676787		P82663	MRPS25	28S ribosomal protein S25, mitochondrial, MRP-S25, S25mt, Mitochondrial small ribosomal subunit protein mS25	-0.182448	-2.90736
O75534	CSDE1	Cold shock domain-containing protein E1, N-ras upstream gene protein, Protein UNR	1.14611	0.0563851		Q6NUQ4	TMEM214	Transmembrane protein 214	-0.814857	-3.44169
Q14011	CIRBP	Cold-inducible RNA-binding protein, A18 hnRNP, Glycine-rich RNA-binding protein CIRP	0.874706	-1.21011		P29692	EEF1D	Elongation factor 1-delta, EF-1-delta, Antigen NY-CO-4	-1.50645	-2.94359
P35268	RPL22	60S ribosomal protein L22, EBER-associated protein, EAP, Epstein-Barr virus small RNA-associated protein, Heparin-binding protein HBp15, Large ribosomal subunit protein eL22	0.64444	-0.25162		Q9NRX2	MRPL17	39S ribosomal protein L17, mitochondrial, L17mt, MRP-L17, LYST-interacting protein 2, Mitochondrial large ribosomal subunit protein bL17m	-0.254948	-2.51515
P31943	HNRNPH1	Heterogeneous nuclear ribonucleoprotein H, hnRNP H	1.10977	0.152532		Q12802	AKAP13	A-kinase anchor protein 13, AKAP-13, AKAP-Lbc, Breast cancer nuclear receptor-binding auxiliary protein, Guanine nucleotide exchange factor Lbc, Human thyroid-anchoring protein 31, Lymphoid blast crisis oncogene, LBC oncogene, Non-oncogenic Rho GTPase-specific GTP exchange factor, Protein kinase A-anchoring protein 13, PRKA13, p47	-0.254519	-3.38978
Q00839	HNRNPU	Heterogeneous nuclear ribonucleoprotein U, hnRNP U, GRIP120, Nuclear p120 ribonucleoprotein, Scaffold-attachment factor A, SAF-A, p120, pp120	0.767511	0.248723		A1X283	SH3PXD2B	SH3 and PX domain-containing protein 2B, Adapter protein HOFI, Factor for adipocyte differentiation 49, Tyrosine kinase substrate with four SH3 domains	-0.179028	-2.7827
O43390	HNRNPR	Heterogeneous nuclear ribonucleoprotein R, hnRNP R	0.995693	-0.163201		Q9NUQ8	ABCF3	ATP-binding cassette sub-family F member 3	0.000377097	-2.3165
P62841	RPS15	40S ribosomal protein S15, RIG protein, Small ribosomal subunit protein uS19	0.759047	-0.343223		P53582	METAP1	Methionine aminopeptidase 1, MAP 1, MetAP 1, 3.4.11.18, Peptidase M 1	-0.225366	-2.44995
Q01130	SRSF2	Serine/arginine-rich splicing factor 2, Protein PR264, Splicing component, 35 kDa, Splicing factor SC35, SC-35, Splicing factor, arginine/serine-rich 2	0.486847	-0.966967		Q9UG63	ABCF2	ATP-binding cassette sub-family F member 2, Iron-inhibited ABC transporter 2	-0.0849054	-1.72712
Q96I24	FUBP3	Far upstream element-binding protein 3, FUSE-binding protein 3	1.43061	-0.0835399		O95602	POLR1A	DNA-directed RNA polymerase I subunit RPA1, RNA polymerase I subunit A1, 2.7.7.6, A190, DNA-directed RNA polymerase I largest subunit, DNA-directed RNA polymerase I subunit A, RNA polymerase I 194 kDa subunit, RPA194	-0.966396	-2.96607
P35637	FUS	RNA-binding protein FUS, 75 kDa DNA-pairing protein, Oncogene FUS, Oncogene TLS, POMp75, Translocated in liposarcoma protein	0.862906	-0.390694		Q13724	MOGS	Mannosyl-oligosaccharide glucosidase, 3.2.1.106, Processing A-glucosidase I	-0.916438	-3.27005
P61353	RPL27	60S ribosomal protein L27, Large ribosomal subunit protein eL27	0.146395	-0.604081		Q9NXF1	TEX10	Testis-expressed protein 10	-0.184748	-2.56287
Q01085	TIAL1	Nucleolysin TIAR, TIA-1-related protein	1.41247	-0.517195		O75340	PDCD6	Programmed cell death protein 6, Apoptosis-linked gene 2 protein homolog, ALG-2	-0.645565	-2.62363
P07910	HNRNPC	Heterogeneous nuclear ribonucleoproteins C1/C2, hnRNP C1/C2	1.01085	0.460644		Q9P2D0	IBTK	Inhibitor of Bruton tyrosine kinase, IBtk	0.164848	-2.90489
P26599	PTBP1	Polypyrimidine tract-binding protein 1, PTB, 57 kDa RNA-binding protein PPTB-1, Heterogeneous nuclear ribonucleoprotein I, hnRNP I	1.0636	0.316775		Q5VT52	RPRD2	Regulation of nuclear pre-mRNA domain-containing protein 2	-0.268667	-3.11047
Q14444	CAPRIN1	Caprin-1, Cell cycle-associated protein 1, Cytoplasmic activation- and proliferation-associated protein 1, GPI-anchored membrane protein 1, GPI-anchored protein p137, GPI-p137, p137GPI, Membrane component chromosome 11 surface marker 1, RNA granule protein 105	0.391557	-0.914628		Q9BYW2	SETD2	Histone-lysine N-methyltransferase SETD2, 2.1.1.359, HIF-1, Huntingtin yeast partner B, Huntingtin-interacting protein 1, HIP-1, Huntingtin-interacting protein B, Lysine N-methyltransferase 3A, Protein-lysine N-methyltransferase SETD2, 2.1.1.-, SET domain-containing protein 2, hSET2, p231HBP	-0.546741	-2.18464
P31942	HNRNPH3	Heterogeneous nuclear ribonucleoprotein H3, hnRNP H3, Heterogeneous nuclear ribonucleoprotein 2H9, hnRNP 2H9	1.12706	-0.408679		Q14247	CTTN	Src substrate cortactin, Amplaxin, Oncogene EMS1	-1.11519	-2.65879
O60506	SYNCRIP	Heterogeneous nuclear ribonucleoprotein Q, hnRNP Q, Glycine- and tyrosine-rich RNA-binding protein, GRY-RBP, NS1-associated protein 1, Synaptotagmin-binding, cytoplasmic RNA-interacting protein	1.17469	0.211482		Q92688	ANP32B	Acidic leucine-rich nuclear phosphoprotein 32 family member B, Acidic protein rich in leucines, Putative HLA-DR-associated protein I-2, PHAPI2, Silver-stainable protein SSP29	-1.00566	-2.56489
Q02543	RPL18A	60S ribosomal protein L18a, Large ribosomal subunit protein eL20	0.746047	-0.242812		O14730	RIOK3	Serine/threonine-protein kinase RIO3, 2.7.11.1, RIO kinase 3, sudD homolog	1.09822	-3.12246
A0AV96	RBM47	RNA-binding protein 47, RNA-binding motif protein 47	1.63833	-0.882386		P46063	RECQL	ATP-dependent DNA helicase Q1, 3.6.4.12, DNA helicase, RecQ-like type 1, RecQ1, DNA-dependent ATPase Q1, RecQ protein-like 1	-1.35391	-3.15665
Q13151	HNRNPA0	Heterogeneous nuclear ribonucleoprotein A0, hnRNP A0	0.846802	-0.630469		Q96T88	UHRF1	E3 ubiquitin-protein ligase UHRF1, 2.3.2.27, Inverted CCAAT box-binding protein of 90 kDa, Nuclear protein 95, Nuclear zinc finger protein Np95, HuNp95, hNp95, RING finger protein 106, RING-type E3 ubiquitin transferase UHRF1, Transcription factor ICBP90, Ubiquitin-like PHD and RING finger domain-containing protein 1, hUHRF1, Ubiquitin-like-containing PHD and RING finger domains protein 1	-1.16141	-3.2404
P62280	RPS11	40S ribosomal protein S11, Small ribosomal subunit protein uS17	0.457221	-0.309706		P33176	KIF5B	Kinesin-1 heavy chain, Conventional kinesin heavy chain, Ubiquitous kinesin heavy chain, UKHC	-1.33232	-2.90437
O76021	RSL1D1	Ribosomal L1 domain-containing protein 1, CATX-11, Cellular senescence-inhibited gene protein, Protein PBK1	0.49157	-0.598378		Q92974	ARHGEF2	Rho guanine nucleotide exchange factor 2, Guanine nucleotide exchange factor H1, GEF-H1, Microtubule-regulated Rho-GEF, Proliferating cell nucleolar antigen p40	-0.558456	-2.93295
Q9GZR2	REXO4	RNA exonuclease 4, 3.1.-.-, Exonuclease XPMC2, Prevents mitotic catastrophe 2 protein homolog, hPMC2	0.326745	-2.27304		Q15084	PDIA6	Protein disulfide-isomerase A6, 5.3.4.1, Endoplasmic reticulum protein 5, ER protein 5, ERp5, Protein disulfide isomerase P5, Thioredoxin domain-containing protein 7	-1.32689	-2.81288
Q14103	HNRNPD	Heterogeneous nuclear ribonucleoprotein D0, hnRNP D0, AU-rich element RNA-binding protein 1	0.755771	-0.354506		Q8WXX5	DNAJC9	DnaJ homolog subfamily C member 9, HDJC9, DnaJ protein SB73	-1.13968	-3.35379
Q15233	NONO	Non-POU domain-containing octamer-binding protein, NonO protein, 54 kDa nuclear RNA- and DNA-binding protein, p54(nrb), p54nrb, 55 kDa nuclear protein, NMT55, DNA-binding p52/p100 complex, 52 kDa subunit	1.1199	0.166232		P37802	TAGLN2	Transgelin-2, Epididymis tissue protein Li 7e, SM22-alpha homolog	-1.58535	-2.81051
P14866	HNRNPL	Heterogeneous nuclear ribonucleoprotein L, hnRNP L	1.09432	0.118205		O43776	NARS1	Asparagine--tRNA ligase, cytoplasmic, 6.1.1.22, Asparaginyl-tRNA synthetase, AsnRS, Asparaginyl-tRNA synthetase 1	-0.998393	-2.54968
Q96PK6	RBM14	RNA-binding protein 14, Paraspeckle protein 2, PSP2, RNA-binding motif protein 14, RRM-containing coactivator activator/modulator, Synaptotagmin-interacting protein, SYT-interacting protein	1.07503	-0.457845		P78347	GTF2I	General transcription factor II-I, GTFII-I, TFII-I, Bruton tyrosine kinase-associated protein 135, BAP-135, BTK-associated protein 135, SRF-Phox1-interacting protein, SPIN, Williams-Beuren syndrome chromosomal region 6 protein	-1.25038	-2.8728
P18124	RPL7	60S ribosomal protein L7, Large ribosomal subunit protein uL30	0.165541	-0.468553		P43307	SSR1	Translocon-associated protein subunit alpha, TRAP-alpha, Signal sequence receptor subunit alpha, SSR-alpha	-0.903465	-3.02925
P39019	RPS19	40S ribosomal protein S19, Small ribosomal subunit protein eS19	-0.859285	-1.62541		Q9H7E9	C8orf33	UPF0488 protein C8orf33	-0.727837	-2.94496
Q99729	HNRNPAB	Heterogeneous nuclear ribonucleoprotein A/B, hnRNP A/B, APOBEC1-binding protein 1, ABBP-1	0.870108	-0.52019		Q99661	KIF2C	Kinesin-like protein KIF2C, Kinesin-like protein 6, Mitotic centromere-associated kinesin, MCAK	-0.41734	-2.67828
Q13283	G3BP1	Ras GTPase-activating protein-binding protein 1, G3BP-1, 3.6.4.12, 3.6.4.13, ATP-dependent DNA helicase VIII, hDH VIII, GAP SH3 domain-binding protein 1	0.501959	-0.865781		Q9BQ70	TCF25	Transcription factor 25, TCF-25, Nuclear localized protein 1	0.200826	-2.92616
Q96AE4	FUBP1	Far upstream element-binding protein 1, FBP, FUSE-binding protein 1, DNA helicase V, hDH V	0.786686	-0.521813		Q8IVF2	AHNAK2	Protein AHNAK2	-0.143393	-3.08206
P29558	RBMS1	RNA-binding motif, single-stranded-interacting protein 1, Single-stranded DNA-binding protein MSSP-1, Suppressor of CDC2 with RNA-binding motif 2	0.950944	-1.50524		O75521	ECI2	Enoyl-CoA delta isomerase 2, 5.3.3.8, DRS-1, Delta(3),delta(2)-enoyl-CoA isomerase, D3,D2-enoyl-CoA isomerase, Diazepam-binding inhibitor-related protein 1, DBI-related protein 1, Dodecenoyl-CoA isomerase, Hepatocellular carcinoma-associated antigen 88, Peroxisomal 3,2-trans-enoyl-CoA isomerase, pECI, Renal carcinoma antigen NY-REN-1	-1.33104	-3.29327
Q9HCE1	MOV10	Helicase MOV-10, 3.6.4.13, Armitage homolog, Moloney leukemia virus 10 protein	0.818687	-0.883474		Q12769	NUP160	Nuclear pore complex protein Nup160, 160 kDa nucleoporin, Nucleoporin Nup160	-0.702674	-2.80811
P50914	RPL14	60S ribosomal protein L14, CAG-ISL 7, Large ribosomal subunit protein eL14	0.481842	-0.545169		Q13813	SPTAN1	Spectrin alpha chain, non-erythrocytic 1, Alpha-II spectrin, Fodrin alpha chain, Spectrin, non-erythroid alpha subunit	-0.277997	-1.54473
Q86V81	ALYREF	THO complex subunit 4, Tho4, Ally of AML-1 and LEF-1, Aly/REF export factor, Transcriptional coactivator Aly/REF, bZIP-enhancing factor BEF	0.263401	-0.899201		Q96GW9	MARS2	Methionine--tRNA ligase, mitochondrial, 6.1.1.10, Methionyl-tRNA synthetase 2, Mitochondrial methionyl-tRNA synthetase, MtMetRS	0.403012	-3.34168
P62979	RPS27A	Ubiquitin-40S ribosomal protein S27a, Ubiquitin carboxyl extension protein 80	-0.358288	-1.04055		Q9BRS2	RIOK1	Serine/threonine-protein kinase RIO1, 2.7.11.1, 3.6.3.-, RIO kinase 1	-0.13169	-2.52356
P62750	RPL23A	60S ribosomal protein L23a, Large ribosomal subunit protein uL23	-0.571362	-1.58004		Q9Y2A7	NCKAP1	Nck-associated protein 1, NAP 1, Membrane-associated protein HEM-2, p125Nap1	-1.05671	-3.38605
P84098	RPL19	60S ribosomal protein L19, Large ribosomal subunit protein eL19	-0.0868857	-1.17284		Q9NTK5	OLA1	Obg-like ATPase 1, DNA damage-regulated overexpressed in cancer 45, DOC45, GTP-binding protein 9	-0.594481	-2.35971
Q92879	CELF1	CUGBP Elav-like family member 1, CELF-1, 50 kDa nuclear polyadenylated RNA-binding protein, Bruno-like protein 2, CUG triplet repeat RNA-binding protein 1, CUG-BP1, CUG-BP- and ETR-3-like factor 1, Deadenylation factor CUG-BP, Embryo deadenylation element-binding protein homolog, EDEN-BP homolog, RNA-binding protein BRUNOL-2	1.74587	-0.0377048		Q9BX10	GTPBP2	GTP-binding protein 2	0.145339	-3.62807
Q15365	PCBP1	Poly(rC)-binding protein 1, Alpha-CP1, Heterogeneous nuclear ribonucleoprotein E1, hnRNP E1, Nucleic acid-binding protein SUB2.3	0.692985	-0.315634		Q96HC4	PDLIM5	PDZ and LIM domain protein 5, Enigma homolog, Enigma-like PDZ and LIM domains protein	-1.12174	-2.77798
Q8IWA0	WDR75	WD repeat-containing protein 75, U3 small nucleolar RNA-associated protein 17 homolog	0.878885	-1.07616		Q8TDB6	DTX3L	E3 ubiquitin-protein ligase DTX3L, 2.3.2.27, B-lymphoma- and BAL-associated protein, Protein deltex-3-like, RING-type E3 ubiquitin transferase DTX3L, Rhysin-2, Rhysin2	-0.420151	-4.28311
Q9NR30	DDX21	Nucleolar RNA helicase 2, 3.6.4.13, DEAD box protein 21, Gu-alpha, Nucleolar RNA helicase Gu, Nucleolar RNA helicase II, RH II/Gu	0.537008	-0.306399		Q93009	USP7	Ubiquitin carboxyl-terminal hydrolase 7, 3.4.19.12, Deubiquitinating enzyme 7, Herpesvirus-associated ubiquitin-specific protease, Ubiquitin thioesterase 7, Ubiquitin-specific-processing protease 7	-1.0763	-2.92513
P62081	RPS7	40S ribosomal protein S7, Small ribosomal subunit protein eS7	-0.140697	-1.05188		O95613	PCNT	Pericentrin, Kendrin, Pericentrin-B	0.340567	-3.72212
Q7KZF4	SND1	Staphylococcal nuclease domain-containing protein 1, 3.1.31.1, 100 kDa coactivator, EBNA2 coactivator p100, Tudor domain-containing protein 11, p100 co-activator	0.780434	-0.228058		Q8TAE8	GADD45GIP1	Growth arrest and DNA damage-inducible proteins-interacting protein 1, 39S ribosomal protein L59, mitochondrial, MRP-L59, CKII beta-associating protein, CR6-interacting factor 1, CRIF1, Mitochondrial large ribosomal subunit protein mL64, Papillomavirus L2-interacting nuclear protein 1, PLINP, PLINP-1, p53-responsive gene 6 protein	-0.210498	-3.1094
P98179	RBM3	RNA-binding protein 3, RNA-binding motif protein 3, RNPL	0.985136	-0.712649		Q12899	TRIM26	Tripartite motif-containing protein 26, 2.3.2.27, Acid finger protein, AFP, RING finger protein 95, Zinc finger protein 173	-0.449349	-3.70202
Q13310	PABPC4	Polyadenylate-binding protein 4, PABP-4, Poly(A)-binding protein 4, Activated-platelet protein 1, APP-1, Inducible poly(A)-binding protein, iPABP	0.374974	-0.725923		O94874	UFL1	E3 UFM1-protein ligase 1, 2.3.2.-, E3 UFM1-protein transferase 1, Multiple alpha-helix protein located at ER, Novel LZAP-binding protein, Regulator of C53/LZAP and DDRGK1	-0.352132	-3.86788
Q92945	KHSRP	Far upstream element-binding protein 2, FUSE-binding protein 2, KH type-splicing regulatory protein, KSRP, p75	1.54217	0.297327		O43813	LANCL1	Glutathione S-transferase LANCL1, 2.5.1.18, 40 kDa erythrocyte membrane protein, p40, LanC-like protein 1	-1.19218	-3.15212
Q08211	DHX9	ATP-dependent RNA helicase A, 3.6.4.13, DEAH box protein 9, DExH-box helicase 9, Leukophysin, LKP, Nuclear DNA helicase II, NDH II, RNA helicase A	0.643424	-0.197232		Q9Y4W6	AFG3L2	AFG3-like protein 2, 3.4.24.-, Paraplegin-like protein	0.0274583	-2.04808
P62753	RPS6	40S ribosomal protein S6, Phosphoprotein NP33, Small ribosomal subunit protein eS6	0.167391	-0.698987		Q14146	URB2	Unhealthy ribosome biogenesis protein 2 homolog	-0.825141	-3.62978
P46783	RPS10	40S ribosomal protein S10, Small ribosomal subunit protein eS10	-0.10929	-1.38012		P49419	ALDH7A1	Alpha-aminoadipic semialdehyde dehydrogenase, Alpha-AASA dehydrogenase, 1.2.1.31, Aldehyde dehydrogenase family 7 member A1, 1.2.1.3, Antiquitin-1, Betaine aldehyde dehydrogenase, 1.2.1.8, Delta1-piperideine-6-carboxylate dehydrogenase, P6c dehydrogenase	-1.37346	-3.54743
P62995	TRA2B	Transformer-2 protein homolog beta, TRA-2 beta, TRA2-beta, hTRA2-beta, Splicing factor, arginine/serine-rich 10, Transformer-2 protein homolog B	0.374439	-1.1795		Q14980	NUMA1	Nuclear mitotic apparatus protein 1, Nuclear matrix protein-22, NMP-22, Nuclear mitotic apparatus protein, NuMA protein, SP-H antigen	-0.951261	-2.77798
P23396	RPS3	40S ribosomal protein S3, 4.2.99.18, Small ribosomal subunit protein uS3	0.0749479	-0.446619		Q9Y2T2	AP3M1	AP-3 complex subunit mu-1, AP-3 adaptor complex mu3A subunit, Adaptor-related protein complex 3 subunit mu-1, Mu-adaptin 3A, Mu3A-adaptin	-0.514895	-2.53364
P11940	PABPC1	Polyadenylate-binding protein 1, PABP-1, Poly(A)-binding protein 1	0.497337	-0.250776		P31689	DNAJA1	DnaJ homolog subfamily A member 1, DnaJ protein homolog 2, HSDJ, Heat shock 40 kDa protein 4, Heat shock protein J2, HSJ-2, Human DnaJ protein 2, hDj-2	-1.37003	-2.61775
P43243	MATR3	Matrin-3	0.773796	-0.259997		P49454	CENPF	Centromere protein F, CENP-F, AH antigen, Kinetochore protein CENPF, Mitosin	-0.232266	-3.61787
P40429	RPL13A	60S ribosomal protein L13a, 23 kDa highly basic protein, Large ribosomal subunit protein uL13	-0.0243376	-1.11704		O15067	PFAS	Phosphoribosylformylglycinamidine synthase, FGAM synthase, FGAMS, 6.3.5.3, Formylglycinamide ribonucleotide amidotransferase, FGAR amidotransferase, FGAR-AT, Formylglycinamide ribotide amidotransferase, Phosphoribosylformylglycineamide amidotransferase	-1.45952	-2.9759
Q5T6F2	UBAP2	Ubiquitin-associated protein 2, UBAP-2, RNA polymerase II degradation factor UBAP2	1.00193	-1.40333		P61221	ABCE1	ATP-binding cassette sub-family E member 1, 2'-5'-oligoadenylate-binding protein, HuHP68, RNase L inhibitor, Ribonuclease 4 inhibitor, RNS4I	-1.48976	-3.38787
P55795	HNRNPH2	Heterogeneous nuclear ribonucleoprotein H2, hnRNP H2, FTP-3, Heterogeneous nuclear ribonucleoprotein H', hnRNP H'	1.10288	-0.862954		P49406	MRPL19	39S ribosomal protein L19, mitochondrial, L19mt, MRP-L19, 39S ribosomal protein L15, mitochondrial, L15mt, MRP-L15, Mitochondrial large ribosomal subunit protein bL19m	-0.780054	-3.01798
Q01844	EWSR1	RNA-binding protein EWS, EWS oncogene, Ewing sarcoma breakpoint region 1 protein	0.503767	-1.21289		Q96DV4	MRPL38	39S ribosomal protein L38, mitochondrial, L38mt, MRP-L38, Mitochondrial large ribosomal subunit protein mL38	-0.27093	-2.91601
Q15366	PCBP2	Poly(rC)-binding protein 2, Alpha-CP2, Heterogeneous nuclear ribonucleoprotein E2, hnRNP E2	0.499513	-0.941294		O60716	CTNND1	Catenin delta-1, Cadherin-associated Src substrate, CAS, p120 catenin, p120(ctn), p120(cas)	-0.573121	-2.68161
Q15434	RBMS2	RNA-binding motif, single-stranded-interacting protein 2, Suppressor of CDC2 with RNA-binding motif 3	1.53731	-2.05495		P06744	GPI	Glucose-6-phosphate isomerase, GPI, 5.3.1.9, Autocrine motility factor, AMF, Neuroleukin, NLK, Phosphoglucose isomerase, PGI, Phosphohexose isomerase, PHI, Sperm antigen 36, SA-36	0.0516888	-0.684133
O00571	DDX3X	ATP-dependent RNA helicase DDX3X, 3.6.4.13, CAP-Rf, DEAD box protein 3, X-chromosomal, DEAD box, X isoform, DBX, Helicase-like protein 2, HLP2	0.570379	-0.428289		Q9Y450	HBS1L	HBS1-like protein, ERFS	-0.682085	-3.61273
Q9Y4C8	RBM19	Probable RNA-binding protein 19, RNA-binding motif protein 19	0.815056	-0.824955		Q9HCS7	XAB2	Pre-mRNA-splicing factor SYF1, Protein HCNP, XPA-binding protein 2	-1.0823	-3.08486
P62910	RPL32	60S ribosomal protein L32, Large ribosomal subunit protein eL32	-0.443351	-1.73022		P02545	LMNA	Prelamin-A/C	-1.7441	-2.23538
Q92841	DDX17	Probable ATP-dependent RNA helicase DDX17, 3.6.4.13, DEAD box protein 17, DEAD box protein p72, DEAD box protein p82, RNA-dependent helicase p72	0.521535	-0.856568		P35573	AGL	Glycogen debranching enzyme, Glycogen debrancher, 4-alpha-glucanotransferase, 2.4.1.25, Oligo-1,4-1,4-glucantransferase, Amylo-alpha-1,6-glucosidase, Amylo-1,6-glucosidase, 3.2.1.33, Dextrin 6-alpha-D-glucosidase	-1.07937	-2.61155
O15371	EIF3D	Eukaryotic translation initiation factor 3 subunit D, eIF3d, Eukaryotic translation initiation factor 3 subunit 7, eIF-3-zeta, eIF3 p66	0.253434	-1.16883		Q70E73	RAPH1	Ras-associated and pleckstrin homology domains-containing protein 1, RAPH1, Amyotrophic lateral sclerosis 2 chromosomal region candidate gene 18 protein, Amyotrophic lateral sclerosis 2 chromosomal region candidate gene 9 protein, Lamellipodin, Proline-rich EVH1 ligand 2, PREL-2, Protein RMO1	-0.426393	-4.08825
P51114	FXR1	RNA-binding protein FXR1, FMR1 autosomal homolog 1, hFXR1p	0.389742	-1.3505		Q14CX7	NAA25	N-alpha-acetyltransferase 25, NatB auxiliary subunit, Mitochondrial distribution and morphology protein 20, N-terminal acetyltransferase B complex subunit MDM20, NatB complex subunit MDM20, N-terminal acetyltransferase B complex subunit NAA25, p120	-0.880323	-3.00826
Q13595	TRA2A	Transformer-2 protein homolog alpha, TRA-2 alpha, TRA2-alpha, Transformer-2 protein homolog A	0.286746	-1.63244		Q16531	DDB1	DNA damage-binding protein 1, DDB p127 subunit, DNA damage-binding protein a, DDBa, Damage-specific DNA-binding protein 1, HBV X-associated protein 1, XAP-1, UV-damaged DNA-binding factor, UV-damaged DNA-binding protein 1, UV-DDB 1, XPE-binding factor, XPE-BF, Xeroderma pigmentosum group E-complementing protein, XPCe	-1.58159	-2.78737
P05455	SSB	Lupus La protein, La autoantigen, La ribonucleoprotein, Sjoegren syndrome type B antigen, SS-B	0.483401	-1.09113		P54132	BLM	RecQ-like DNA helicase BLM, 3.6.4.12, Bloom syndrome protein, DNA helicase, RecQ-like type 2, RecQ2, RecQ protein-like 3	-0.286915	-3.7006
Q96CM3	RPUSD4	Pseudouridylate synthase RPUSD4, mitochondrial, 5.4.99.-, RNA pseudouridylate synthase domain-containing protein 4	0.943135	-2.18511		A6NHR9	SMCHD1	Structural maintenance of chromosomes flexible hinge domain-containing protein 1, SMC hinge domain-containing protein 1, 3.6.1.-	-1.15943	-3.31894
P62269	RPS18	40S ribosomal protein S18, Ke-3, Ke3, Small ribosomal subunit protein uS13	-0.420079	-1.21412		Q86XL3	ANKLE2	Ankyrin repeat and LEM domain-containing protein 2, LEM domain-containing protein 4	-0.0503274	-2.82361
P31483	TIA1	Cytotoxic granule associated RNA binding protein TIA1, Nucleolysin TIA-1 isoform p40, RNA-binding protein TIA-1, T-cell-restricted intracellular antigen-1, TIA-1, p40-TIA-1	1.32918	-1.11202		Q9NSV4	DIAPH3	Protein diaphanous homolog 3, Diaphanous-related formin-3, DRF3, MDia2	0.176857	-2.83375
P62847	RPS24	40S ribosomal protein S24, Small ribosomal subunit protein eS24	0.716176	-0.719394		Q63HN8	RNF213	E3 ubiquitin-protein ligase RNF213, 2.3.2.27, 3.6.4.-, ALK lymphoma oligomerization partner on chromosome 17, E3 ubiquitin-lipopolysaccharide ligase RNF213, 2.3.2.-, Mysterin, RING finger protein 213	-0.717072	-2.99497
Q9BZE4	GTPBP4	GTP-binding protein 4, Chronic renal failure gene protein, GTP-binding protein NGB, Nucleolar GTP-binding protein 1	0.314854	-1.08928		Q12789	GTF3C1	General transcription factor 3C polypeptide 1, TF3C-alpha, TFIIIC box B-binding subunit, Transcription factor IIIC 220 kDa subunit, TFIIIC 220 kDa subunit, TFIIIC220, Transcription factor IIIC subunit alpha	-0.986506	-3.57833
Q8TDD1	DDX54	ATP-dependent RNA helicase DDX54, 3.6.4.13, ATP-dependent RNA helicase DP97, DEAD box RNA helicase 97 kDa, DEAD box protein 54	0.51026	-0.92026		P46734	MAP2K3	Dual specificity mitogen-activated protein kinase kinase 3, MAP kinase kinase 3, MAPKK 3, 2.7.12.2, MAPK/ERK kinase 3, MEK 3, Stress-activated protein kinase kinase 2, SAPK kinase 2, SAPKK-2, SAPKK2	-0.742491	-3.14939
Q8WXF1	PSPC1	Paraspeckle component 1, Paraspeckle protein 1	1.07382	-1.14757		Q96E11	MRRF	Ribosome-recycling factor, mitochondrial, RRF, Ribosome-releasing factor, mitochondrial	-1.36782	-3.7328
P17844	DDX5	Probable ATP-dependent RNA helicase DDX5, 3.6.4.13, DEAD box protein 5, RNA helicase p68	0.652701	-0.196051		P28288	ABCD3	ATP-binding cassette sub-family D member 3, 3.1.2.-, 7.6.2.-, 70 kDa peroxisomal membrane protein, PMP70	-1.93454	-3.52283
Q96QC0	PPP1R10	Serine/threonine-protein phosphatase 1 regulatory subunit 10, MHC class I region proline-rich protein CAT53, PP1-binding protein of 114 kDa, Phosphatase 1 nuclear targeting subunit, Protein FB19, p99	0.84024	-1.68819		Q14674	ESPL1	Separin, 3.4.22.49, Caspase-like protein ESPL1, Extra spindle poles-like 1 protein, Separase	0.0381335	-3.5559
Q9ULW3	ABT1	Activator of basal transcription 1, hABT1, Basal transcriptional activator	0.478474	-2.25268		P06493	CDK1	Cyclin-dependent kinase 1, CDK1, 2.7.11.22, 2.7.11.23, Cell division control protein 2 homolog, Cell division protein kinase 1, p34 protein kinase	-1.70217	-2.79909
P08708	RPS17	40S ribosomal protein S17, Small ribosomal subunit protein eS17	-0.35491	-1.27372		Q5SW79	CEP170	Centrosomal protein of 170 kDa, Cep170, KARP-1-binding protein, KARP1-binding protein	-0.824248	-4.24215
Q99848	EBNA1BP2	Probable rRNA-processing protein EBP2, EBNA1-binding protein 2, Nucleolar protein p40	0.306633	-1.17751		O14578	CIT	Citron Rho-interacting kinase, CRIK, 2.7.11.1, Serine/threonine-protein kinase 21	0.719413	-2.9699
P39023	RPL3	60S ribosomal protein L3, HIV-1 TAR RNA-binding protein B, TARBP-B, Large ribosomal subunit protein uL3	-0.149362	-0.785879		Q9C0D5	TANC1	Protein TANC1, Tetratricopeptide repeat, ankyrin repeat and coiled-coil domain-containing protein 1	-0.0596748	-3.15393
Q9UN86	G3BP2	Ras GTPase-activating protein-binding protein 2, G3BP-2, GAP SH3 domain-binding protein 2	0.418481	-1.30859		Q14008	CKAP5	Cytoskeleton-associated protein 5, Colonic and hepatic tumor overexpressed gene protein, Ch-TOG	-0.706463	-2.69547
P62263	RPS14	40S ribosomal protein S14, Small ribosomal subunit protein uS11	-0.271965	-1.12372		Q13200	PSMD2	26S proteasome non-ATPase regulatory subunit 2, 26S proteasome regulatory subunit RPN1, 26S proteasome regulatory subunit S2, 26S proteasome subunit p97, Protein 55.11, Tumor necrosis factor type 1 receptor-associated protein 2	-1.52436	-2.80104
Q12905	ILF2	Interleukin enhancer-binding factor 2, Nuclear factor of activated T-cells 45 kDa	0.178263	-1.38061		P24752	ACAT1	Acetyl-CoA acetyltransferase, mitochondrial, 2.3.1.9, Acetoacetyl-CoA thiolase, T2	-1.41275	-2.93135
Q9BUJ2	HNRNPUL1	Heterogeneous nuclear ribonucleoprotein U-like protein 1, Adenovirus early region 1B-associated protein 5, E1B-55 kDa-associated protein 5, E1B-AP5	0.282305	-1.01726		P33981	TTK	Dual specificity protein kinase TTK, 2.7.12.1, Phosphotyrosine picked threonine-protein kinase, PYT	-0.0930974	-3.38658
Q13242	SRSF9	Serine/arginine-rich splicing factor 9, Pre-mRNA-splicing factor SRp30C, Splicing factor, arginine/serine-rich 9	0.612653	-1.45211		P00367	GLUD1	Glutamate dehydrogenase 1, mitochondrial, GDH 1, 1.4.1.3	-1.40124	-2.78172
P62241	RPS8	40S ribosomal protein S8, Small ribosomal subunit protein eS8	-0.476201	-1.19806		Q8WYP5	AHCTF1	Protein ELYS, Embryonic large molecule derived from yolk sac, Protein MEL-28, Putative AT-hook-containing transcription factor 1	-1.34697	-3.31835
Q86UE4	MTDH	Protein LYRIC, 3D3/LYRIC, Astrocyte elevated gene-1 protein, AEG-1, Lysine-rich CEACAM1 co-isolated protein, Metadherin, Metastasis adhesion protein	0.095666	-1.93937		Q8IWC1	MAP7D3	MAP7 domain-containing protein 3	-0.68256	-3.85487
Q9BQG0	MYBBP1A	Myb-binding protein 1A	0.287587	-0.924241		Q12800	TFCP2	Alpha-globin transcription factor CP2, SAA3 enhancer factor, Transcription factor LSF	-1.09421	-3.71635
O43865	AHCYL1	S-adenosylhomocysteine hydrolase-like protein 1, DC-expressed AHCY-like molecule, IP(3)Rs binding protein released with IP(3), IRBIT, Putative adenosylhomocysteinase 2, S-adenosyl-L-homocysteine hydrolase 2, AdoHcyase 2	-0.748447	-1.00666		P0CW18	PRSS56	Serine protease 56, 3.4.21.-	-1.06493	-2.59307
Q12926	ELAVL2	ELAV-like protein 2, ELAV-like neuronal protein 1, Hu-antigen B, HuB, Nervous system-specific RNA-binding protein Hel-N1	0.608032	-1.29072		Q9BT17	MTG1	Mitochondrial ribosome-associated GTPase 1, GTP-binding protein 7, Mitochondrial GTPase 1	-0.186342	-3.67975
P14678	SNRPB	Small nuclear ribonucleoprotein-associated proteins B and B', snRNP-B, Sm protein B/B', Sm-B/B', SmB/B'	-0.0242727	-1.51875		P10515	DLAT	Dihydrolipoyllysine-residue acetyltransferase component of pyruvate dehydrogenase complex, mitochondrial, 2.3.1.12, 70 kDa mitochondrial autoantigen of primary biliary cirrhosis, PBC, Dihydrolipoamide acetyltransferase component of pyruvate dehydrogenase complex, M2 antigen complex 70 kDa subunit, Pyruvate dehydrogenase complex component E2, PDC-E2, PDCE2	-0.850431	-2.79748
Q13247	SRSF6	Serine/arginine-rich splicing factor 6, Pre-mRNA-splicing factor SRP55, Splicing factor, arginine/serine-rich 6	0.465147	-0.620884		Q86TU7	SETD3	Actin-histidine N-methyltransferase, 2.1.1.85, Protein-L-histidine N-tele-methyltransferase, SET domain-containing protein 3, hSETD3	-1.24932	-4.16122
Q13823	GNL2	Nucleolar GTP-binding protein 2, Autoantigen NGP-1	0.671379	-1.17224		Q9UDY2	TJP2	Tight junction protein ZO-2, Tight junction protein 2, Zona occludens protein 2, Zonula occludens protein 2	-1.11434	-3.28323
P09012	SNRPA	U1 small nuclear ribonucleoprotein A, U1 snRNP A, U1-A, U1A	-0.34904	-2.0112		Q9Y3B9	RRP15	RRP15-like protein, Ribosomal RNA-processing protein 15	-0.532897	-2.37531
Q92900	UPF1	Regulator of nonsense transcripts 1, 3.6.4.12, 3.6.4.13, ATP-dependent helicase RENT1, Nonsense mRNA reducing factor 1, NORF1, Up-frameshift suppressor 1 homolog, hUpf1	0.62185	-0.861517		Q6P2E9	EDC4	Enhancer of mRNA-decapping protein 4, Autoantigen Ge-1, Autoantigen RCD-8, Human enhancer of decapping large subunit, Hedls	-1.37921	-3.66788
Q9NV06	DCAF13	DDB1- and CUL4-associated factor 13, WD repeat and SOF domain-containing protein 1	0.723073	-1.62473		Q9HD20	ATP13A1	Endoplasmic reticulum transmembrane helix translocase, 7.4.2.-, Endoplasmic reticulum P5A-ATPase	-0.879045	-3.4773
Q9NY93	DDX56	Probable ATP-dependent RNA helicase DDX56, 3.6.4.13, ATP-dependent 61 kDa nucleolar RNA helicase, DEAD box protein 21, DEAD box protein 56	0.78978	-1.44622		O60333	KIF1B	Kinesin-like protein KIF1B, Klp	0.118496	-3.65292
Q02878	RPL6	60S ribosomal protein L6, Large ribosomal subunit protein eL6, Neoplasm-related protein C140, Tax-responsive enhancer element-binding protein 107, TaxREB107	-0.26555	-0.982367		O95299	NDUFA10	NADH dehydrogenase [ubiquinone] 1 alpha subcomplex subunit 10, mitochondrial, Complex I-42kD, CI-42kD, NADH-ubiquinone oxidoreductase 42 kDa subunit	-1.21582	-3.69959
P62888	RPL30	60S ribosomal protein L30, Large ribosomal subunit protein eL30	-0.385213	-1.33193		Q6P1N0	CC2D1A	Coiled-coil and C2 domain-containing protein 1A, Akt kinase-interacting protein 1, Five prime repressor element under dual repression-binding protein 1, FRE under dual repression-binding protein 1, Freud-1, Putative NF-kappa-B-activating protein 023N	-0.593117	-3.84917
O75179	ANKRD17	Ankyrin repeat domain-containing protein 17, Gene trap ankyrin repeat protein, Serologically defined breast cancer antigen NY-BR-16	0.892302	-1.56498		Q8WXH0	SYNE2	Nesprin-2, KASH domain-containing protein 2, KASH2, Nuclear envelope spectrin repeat protein 2, Nucleus and actin connecting element protein, Protein NUANCE, Synaptic nuclear envelope protein 2, Syne-2	0.161778	-2.55831
Q8NDT2	RBM15B	Putative RNA-binding protein 15B, One-twenty two protein 3, HsOTT3, HuOTT3, RNA-binding motif protein 15B	1.37013	-1.6414		O60566	BUB1B	Mitotic checkpoint serine/threonine-protein kinase BUB1 beta, 2.7.11.1, MAD3/BUB1-related protein kinase, hBUBR1, Mitotic checkpoint kinase MAD3L, Protein SSK1	-0.670359	-3.61066
P27816	MAP4	Microtubule-associated protein 4, MAP-4	0.369753	-0.776349		O14802	POLR3A	DNA-directed RNA polymerase III subunit RPC1, RNA polymerase III subunit C1, 2.7.7.6, DNA-directed RNA polymerase III largest subunit, DNA-directed RNA polymerase III subunit A, RNA polymerase III 155 kDa subunit, RPC155, RNA polymerase III subunit C160	-0.263096	-3.46647
Q6P2Q9	PRPF8	Pre-mRNA-processing-splicing factor 8, 220 kDa U5 snRNP-specific protein, PRP8 homolog, Splicing factor Prp8, p220	0.412968	-0.71818		Q9NZM1	MYOF	Myoferlin, Fer-1-like protein 3	-1.1357	-2.38456
P62633	CNBP	CCHC-type zinc finger nucleic acid binding protein, Cellular nucleic acid-binding protein, CNBP, Zinc finger protein 9	0.363411	-1.32789		Q6P1X5	TAF2	Transcription initiation factor TFIID subunit 2, 150 kDa cofactor of initiator function, RNA polymerase II TBP-associated factor subunit B, TBP-associated factor 150 kDa, Transcription initiation factor TFIID 150 kDa subunit, TAF(II)150, TAFII-150, TAFII150	-0.294323	-3.92837
O95758	PTBP3	Polypyrimidine tract-binding protein 3, Regulator of differentiation 1, Rod1	1.24257	-1.24072		Q53EZ4	CEP55	Centrosomal protein of 55 kDa, Cep55, Up-regulated in colon cancer 6	-0.567881	-3.98465
Q8TED0	UTP15	U3 small nucleolar RNA-associated protein 15 homolog	0.717945	-1.31624		Q92621	NUP205	Nuclear pore complex protein Nup205, 205 kDa nucleoporin, Nucleoporin Nup205	-1.37539	-3.09563
P26368	U2AF2	Splicing factor U2AF 65 kDa subunit, U2 auxiliary factor 65 kDa subunit, hU2AF(65), hU2AF65, U2 snRNP auxiliary factor large subunit	0.796957	-0.794279		P52701	MSH6	DNA mismatch repair protein Msh6, hMSH6, G/T mismatch-binding protein, GTBP, GTMBP, MutS protein homolog 6, MutS-alpha 160 kDa subunit, p160	-1.23382	-2.76374
Q6DKI1	RPL7L1	60S ribosomal protein L7-like 1, Large ribosomal subunit protein uL30-like 1	0.275203	-1.5942		Q4G0N4	NADK2	NAD kinase 2, mitochondrial, 2.7.1.23, Mitochondrial NAD kinase, NAD kinase domain-containing protein 1, mitochondrial	-0.86549	-2.99584
P36578	RPL4	60S ribosomal protein L4, 60S ribosomal protein L1, Large ribosomal subunit protein uL4	0.501429	-0.0116993		P11310	ACADM	Medium-chain specific acyl-CoA dehydrogenase, mitochondrial, 1.3.8.7	-1.46719	-2.82713
P46776	RPL27A	60S ribosomal protein L27a, Large ribosomal subunit protein uL15	-0.309396	-1.4379		Q8N3U4	STAG2	Cohesin subunit SA-2, SCC3 homolog 2, Stromal antigen 2	-1.98966	-4.07702
Q8TDN6	BRIX1	Ribosome biogenesis protein BRX1 homolog, Brix domain-containing protein 2	-0.111102	-1.44229		Q9ULT8	HECTD1	E3 ubiquitin-protein ligase HECTD1, 2.3.2.26, E3 ligase for inhibin receptor, EULIR, HECT domain-containing protein 1	-1.14264	-3.4021
Q14690	PDCD11	Protein RRP5 homolog, NF-kappa-B-binding protein, NFBP, Programmed cell death protein 11	0.651272	-0.861512		P21359	NF1	Neurofibromin, Neurofibromatosis-related protein NF-1	-0.735774	-4.23165
P62424	RPL7A	60S ribosomal protein L7a, Large ribosomal subunit protein eL8, PLA-X polypeptide, Surfeit locus protein 3	-0.686764	-1.27942		P27144	AK4	Adenylate kinase 4, mitochondrial, AK 4, 2.7.4.10, 2.7.4.6, Adenylate kinase 3-like, GTP:AMP phosphotransferase AK4	-1.90527	-3.93916
Q8WWM7	ATXN2L	Ataxin-2-like protein, Ataxin-2 domain protein, Ataxin-2-related protein	0.4937	-1.66336		Q12965	MYO1E	Unconventional myosin-Ie, Myosin-Ic, Unconventional myosin 1E	-1.36688	-2.88575
Q14152	EIF3A	Eukaryotic translation initiation factor 3 subunit A, eIF3a, Eukaryotic translation initiation factor 3 subunit 10, eIF-3-theta, eIF3 p167, eIF3 p180, eIF3 p185	0.519576	-0.448298		P11177	PDHB	Pyruvate dehydrogenase E1 component subunit beta, mitochondrial, PDHE1-B, 1.2.4.1	-1.38638	-3.39745
Q5BKZ1	ZNF326	DBIRD complex subunit ZNF326, Zinc finger protein 326, Zinc finger protein interacting with mRNPs and DBC1	0.568749	-1.183		P08559	PDHA1	Pyruvate dehydrogenase E1 component subunit alpha, somatic form, mitochondrial, 1.2.4.1, PDHE1-A type I	-1.38148	-3.04376
Q9Y520	PRRC2C	Protein PRRC2C, BAT2 domain-containing protein 1, HBV X-transactivated gene 2 protein, HBV XAg-transactivated protein 2, HLA-B-associated transcript 2-like 2, Proline-rich and coiled-coil-containing protein 2C	0.840898	-0.987712		P05023	ATP1A1	Sodium/potassium-transporting ATPase subunit alpha-1, Na(+)/K(+) ATPase alpha-1 subunit, 7.2.2.13, Sodium pump subunit alpha-1	-1.68349	-2.5432
Q9GZT3	SLIRP	SRA stem-loop-interacting RNA-binding protein, mitochondrial	0.382156	-1.25014		P13804	ETFA	Electron transfer flavoprotein subunit alpha, mitochondrial, Alpha-ETF	-1.83961	-3.46765
Q9UQ80	PA2G4	Proliferation-associated protein 2G4, Cell cycle protein p38-2G4 homolog, hG4-1, ErbB3-binding protein 1	0.223416	-0.637255		Q86TC9	MYPN	Myopalladin, 145 kDa sarcomeric protein	-0.963207	-3.45867
Q15427	SF3B4	Splicing factor 3B subunit 4, Pre-mRNA-splicing factor SF3b 49 kDa subunit, Spliceosome-associated protein 49, SAP 49	0.969541	-1.83418		Q9P265	DIP2B	Disco-interacting protein 2 homolog B, DIP2 homolog B	-1.15458	-3.44472
Q14671	PUM1	Pumilio homolog 1, HsPUM, Pumilio-1	1.30391	-0.847998		Q9P2J5	LARS1	Leucine--tRNA ligase, cytoplasmic, 6.1.1.4, Leucyl-tRNA synthetase, LeuRS	-1.42468	-2.70919
P51116	FXR2	RNA-binding protein FXR2, FXR2P, FMR1 autosomal homolog 2	0.569439	-1.8056		Q03001	DST	Dystonin, 230 kDa bullous pemphigoid antigen, 230/240 kDa bullous pemphigoid antigen, Bullous pemphigoid antigen 1, BPA, Bullous pemphigoid antigen, Dystonia musculorum protein, Hemidesmosomal plaque protein	-0.361233	-3.32739
Q9BX40	LSM14B	Protein LSM14 homolog B, RNA-associated protein 55B, hRAP55B	0.413111	-2.84365		Q99798	ACO2	Aconitate hydratase, mitochondrial, Aconitase, 4.2.1.3, Citrate hydro-lyase	-1.21459	-2.90916
P11387	TOP1	DNA topoisomerase 1, 5.6.2.1, DNA topoisomerase I	-0.136538	-1.69941		Q96I59	NARS2	Probable asparagine--tRNA ligase, mitochondrial, 6.1.1.22, Asparaginyl-tRNA synthetase, AsnRS	-0.888742	-3.86125
Q8IY67	RAVER1	Ribonucleoprotein PTB-binding 1, Protein raver-1	1.05313	-1.53559		P31040	SDHA	Succinate dehydrogenase [ubiquinone] flavoprotein subunit, mitochondrial, 1.3.5.1, Flavoprotein subunit of complex II, Fp	-1.53413	-3.06906
P46782	RPS5	40S ribosomal protein S5, Small ribosomal subunit protein uS7	-0.273875	-1.28382		Q8WUM0	NUP133	Nuclear pore complex protein Nup133, 133 kDa nucleoporin, Nucleoporin Nup133	-1.0868	-3.10145
Q9NZI8	IGF2BP1	Insulin-like growth factor 2 mRNA-binding protein 1, IGF2 mRNA-binding protein 1, IMP-1, IMP1, Coding region determinant-binding protein, CRD-BP, IGF-II mRNA-binding protein 1, VICKZ family member 1, Zipcode-binding protein 1, ZBP-1	0.853034	-0.722219		P26640	VARS1	Valine--tRNA ligase, 6.1.1.9, Protein G7a, Valyl-tRNA synthetase, ValRS	-1.01838	-2.04736
Q00341	HDLBP	Vigilin, High density lipoprotein-binding protein, HDL-binding protein	0.52681	-0.810646		O95373	IPO7	Importin-7, Imp7, Ran-binding protein 7, RanBP7	-1.00736	-1.98606
Q8IX01	SUGP2	SURP and G-patch domain-containing protein 2, Arginine/serine-rich-splicing factor 14, Splicing factor, arginine/serine-rich 14	0.673874	-1.54314		Q6RFH5	WDR74	WD repeat-containing protein 74, NOP seven-associated protein 1	-0.959398	-3.44225
Q9BVJ6	UTP14A	U3 small nucleolar RNA-associated protein 14 homolog A, Antigen NY-CO-16, Serologically defined colon cancer antigen 16	0.66639	-1.31836		O15357	INPPL1	Phosphatidylinositol 3,4,5-trisphosphate 5-phosphatase 2, 3.1.3.86, Inositol polyphosphate phosphatase-like protein 1, INPPL-1, Protein 51C, SH2 domain-containing inositol 5'-phosphatase 2, SH2 domain-containing inositol phosphatase 2, SHIP-2	-0.249462	-2.83962
Q14692	BMS1	Ribosome biogenesis protein BMS1 homolog, Ribosome assembly protein BMS1 homolog	0.893705	-0.922838		Q92878	RAD50	DNA repair protein RAD50, hRAD50, 3.6.-.-	-1.4168	-3.1661
Q96E39	RBMXL1	RNA binding motif protein, X-linked-like-1, Heterogeneous nuclear ribonucleoprotein G-like 1	0.812525	-1.67289		P11021	HSPA5	Endoplasmic reticulum chaperone BiP, 3.6.4.10, 78 kDa glucose-regulated protein, GRP-78, Binding-immunoglobulin protein, BiP, Heat shock protein 70 family protein 5, HSP70 family protein 5, Heat shock protein family A member 5, Immunoglobulin heavy chain-binding protein	-1.7069	-2.07002
Q52LJ0	FAM98B	Protein FAM98B	0.207276	-2.23982		P31930	UQCRC1	Cytochrome b-c1 complex subunit 1, mitochondrial, Complex III subunit 1, Core protein I, Ubiquinol-cytochrome-c reductase complex core protein 1	-1.08449	-2.73029
Q9UGR2	ZC3H7B	Zinc finger CCCH domain-containing protein 7B, Rotavirus 'X'-associated non-structural protein, RoXaN	0.878415	-1.6201		P49748	ACADVL	Very long-chain specific acyl-CoA dehydrogenase, mitochondrial, VLCAD, 1.3.8.9	-1.69044	-3.14549
P46778	RPL21	60S ribosomal protein L21, Large ribosomal subunit protein eL21	-0.508198	-1.57955		Q13501	SQSTM1	Sequestosome-1, EBI3-associated protein of 60 kDa, EBIAP, p60, Phosphotyrosine-independent ligand for the Lck SH2 domain of 62 kDa, Ubiquitin-binding protein p62	-1.24629	-2.93747
Q9UHX1	PUF60	Poly(U)-binding-splicing factor PUF60, 60 kDa poly(U)-binding-splicing factor, FUSE-binding protein-interacting repressor, FBP-interacting repressor, Ro-binding protein 1, RoBP1, Siah-binding protein 1, Siah-BP1	0.593771	-1.16047		Q96KG9	SCYL1	N-terminal kinase-like protein, Coated vesicle-associated kinase of 90 kDa, SCY1-like protein 1, Telomerase regulation-associated protein, Telomerase transcriptional element-interacting factor, Teratoma-associated tyrosine kinase	-0.942251	-3.44568
Q8IXT5	RBM12B	RNA-binding protein 12B, RNA-binding motif protein 12B	1.23855	-1.66662		Q9Y399	MRPS2	28S ribosomal protein S2, mitochondrial, MRP-S2, S2mt, Mitochondrial small ribosomal subunit protein uS2m	-0.999626	-3.26137
O60832	DKC1	H/ACA ribonucleoprotein complex subunit DKC1, 5.4.99.-, CBF5 homolog, Dyskerin, Nopp140-associated protein of 57 kDa, Nucleolar protein NAP57, Nucleolar protein family A member 4, snoRNP protein DKC1	0.282601	-1.33799		P23258	TUBG1	Tubulin gamma-1 chain, Gamma-1-tubulin, Gamma-tubulin complex component 1, GCP-1	-1.26818	-3.24655
Q16629	SRSF7	Serine/arginine-rich splicing factor 7, Splicing factor 9G8, Splicing factor, arginine/serine-rich 7	0.69195	-0.538016		Q9NZN5	ARHGEF12	Rho guanine nucleotide exchange factor 12, Leukemia-associated RhoGEF	-0.474997	-4.13927
P67809	YBX1	Y-box-binding protein 1, YB-1, CCAAT-binding transcription factor I subunit A, CBF-A, DNA-binding protein B, DBPB, Enhancer factor I subunit A, EFI-A, Nuclease-sensitive element-binding protein 1, Y-box transcription factor	0.884454	-0.288995		P38117	ETFB	Electron transfer flavoprotein subunit beta, Beta-ETF	-2.0479	-3.55924
P27635	RPL10	60S ribosomal protein L10, Laminin receptor homolog, Large ribosomal subunit protein uL16, Protein QM, Ribosomal protein L10, Tumor suppressor QM	-0.449731	-1.33601		Q7Z4H7	HAUS6	HAUS augmin-like complex subunit 6	-0.571356	-4.29317
P30086	PEBP1	Phosphatidylethanolamine-binding protein 1, PEBP-1, HCNPpp, Neuropolypeptide h3, Prostatic-binding protein, Raf kinase inhibitor protein, RKIP	-0.432995	-1.83891		O75663	TIPRL	TIP41-like protein, Putative MAPK-activating protein PM10, Type 2A-interacting protein, TIP	-1.39951	-4.36951
Q9NW64	RBM22	Pre-mRNA-splicing factor RBM22, RNA-binding motif protein 22, Zinc finger CCCH domain-containing protein 16	0.814096	-1.4611		P50416	CPT1A	Carnitine O-palmitoyltransferase 1, liver isoform, CPT1-L, 2.3.1.21, Carnitine O-palmitoyltransferase I, liver isoform, CPT I, CPTI-L, Carnitine palmitoyltransferase 1A	-1.46876	-3.05938
Q9NY12	GAR1	H/ACA ribonucleoprotein complex subunit 1, Nucleolar protein family A member 1, snoRNP protein GAR1	0.697511	-1.67745		O15091	PRORP	Mitochondrial ribonuclease P catalytic subunit, 3.1.26.5, Mitochondrial ribonuclease P protein 3, Mitochondrial RNase P protein 3, Protein only RNase P catalytic subunit	-0.354816	-4.10435
Q9NZB2	FAM120A	Constitutive coactivator of PPAR-gamma-like protein 1, Oxidative stress-associated Src activator, Protein FAM120A	0.884745	-0.78838		Q9H3S7	PTPN23	Tyrosine-protein phosphatase non-receptor type 23, 3.1.3.48, His domain-containing protein tyrosine phosphatase, HD-PTP, Protein tyrosine phosphatase TD14, PTP-TD14	-0.930177	-4.1465
Q08170	SRSF4	Serine/arginine-rich splicing factor 4, Pre-mRNA-splicing factor SRP75, SRP001LB, Splicing factor, arginine/serine-rich 4	0.657964	-1.85202		Q5VYK3	ECPAS	Proteasome adapter and scaffold protein ECM29, Ecm29 proteasome adapter and scaffold, Proteasome-associated protein ECM29 homolog	-1.2932	-2.69903
Q6P5R6	RPL22L1	60S ribosomal protein L22-like 1, Large ribosomal subunit protein eL22-like 1	0.673411	-1.76469		Q9Y697	NFS1	Cysteine desulfurase, 2.8.1.7	-1.50868	-3.73368
Q8ND56	LSM14A	Protein LSM14 homolog A, Protein FAM61A, Protein SCD6 homolog, Putative alpha-synuclein-binding protein, AlphaSNBP, RNA-associated protein 55A, hRAP55, hRAP55A	0.765601	-1.87617		P42226	STAT6	Signal transducer and activator of transcription 6, IL-4 Stat	-1.23362	-3.83169
P61247	RPS3A	40S ribosomal protein S3a, Small ribosomal subunit protein eS1, v-fos transformation effector protein, Fte-1	-0.315676	-0.885182		O95573	ACSL3	Fatty acid CoA ligase Acsl3, Arachidonate--CoA ligase, 6.2.1.15, Long-chain acyl-CoA synthetase 3, LACS 3, Long-chain-fatty-acid--CoA ligase 3, 6.2.1.3, Medium-chain acyl-CoA ligase Acsl3, 6.2.1.2	-1.86566	-3.29725
O00541	PES1	Pescadillo homolog	-0.0795251	-1.48541		Q15031	LARS2	Leucine--tRNA ligase, mitochondrial, 6.1.1.4, Leucyl-tRNA synthetase, LeuRS	-1.43524	-3.71319
P42704	LRPPRC	Leucine-rich PPR motif-containing protein, mitochondrial, 130 kDa leucine-rich protein, LRP 130, GP130	0.821831	-0.0291755		Q15437	SEC23B	Protein transport protein Sec23B, hSec23B, SEC23-related protein B	-1.97711	-3.95201
Q12849	GRSF1	G-rich sequence factor 1, GRSF-1	0.940326	-0.921159		O15230	LAMA5	Laminin subunit alpha-5, Laminin-10 subunit alpha, Laminin-11 subunit alpha, Laminin-15 subunit alpha	0.124636	-3.24084
Q13573	SNW1	SNW domain-containing protein 1, Nuclear protein SkiP, Nuclear receptor coactivator NCoA-62, Ski-interacting protein	-0.354368	-2.7975		P57678	GEMIN4	Gem-associated protein 4, Gemin-4, Component of gems 4, p97	-1.62971	-3.71726
Q9NX24	NHP2	H/ACA ribonucleoprotein complex subunit 2, Nucleolar protein family A member 2, snoRNP protein NHP2	0.24028	-2.02193		P46940	IQGAP1	Ras GTPase-activating-like protein IQGAP1, p195	-1.6449	-2.4941
Q76FK4	NOL8	Nucleolar protein 8, Nucleolar protein Nop132	0.399611	-2.34098		Q93008	USP9X	Probable ubiquitin carboxyl-terminal hydrolase FAF-X, 3.4.19.12, Deubiquitinating enzyme FAF-X, Fat facets in mammals, hFAM, Fat facets protein-related, X-linked, Ubiquitin thioesterase FAF-X, Ubiquitin-specific protease 9, X chromosome, Ubiquitin-specific-processing protease FAF-X	-1.35406	-3.37046
Q9NWH9	SLTM	SAFB-like transcription modulator, Modulator of estrogen-induced transcription	0.361736	-1.76691		O94979	SEC31A	Protein transport protein Sec31A, ABP125, ABP130, SEC31-like protein 1, SEC31-related protein A, Web1-like protein	-1.75719	-3.32198
Q9H8H0	NOL11	Nucleolar protein 11	0.175027	-1.94008		P11717	IGF2R	Cation-independent mannose-6-phosphate receptor, CI Man-6-P receptor, CI-MPR, M6PR, 300 kDa mannose 6-phosphate receptor, MPR 300, Insulin-like growth factor 2 receptor, Insulin-like growth factor II receptor, IGF-II receptor, M6P/IGF2 receptor, M6P/IGF2R, CD222	-0.958536	-3.20796
P22087	FBL	rRNA 2'-O-methyltransferase fibrillarin, 2.1.1.-, 34 kDa nucleolar scleroderma antigen, Histone-glutamine methyltransferase, U6 snRNA 2'-O-methyltransferase fibrillarin	0.355868	-0.999005		Q6UB35	MTHFD1L	Monofunctional C1-tetrahydrofolate synthase, mitochondrial, 6.3.4.3, Formyltetrahydrofolate synthetase	-1.57338	-3.41703
Q9NVN8	GNL3L	Guanine nucleotide-binding protein-like 3-like protein	1.07948	-1.25422		Q14C86	GAPVD1	GTPase-activating protein and VPS9 domain-containing protein 1, GAPex-5, Rab5-activating protein 6	-1.75468	-3.58523
P33240	CSTF2	Cleavage stimulation factor subunit 2, CF-1 64 kDa subunit, Cleavage stimulation factor 64 kDa subunit, CSTF 64 kDa subunit, CstF-64	1.00158	-1.37131		P00533	EGFR	Epidermal growth factor receptor, 2.7.10.1, Proto-oncogene c-ErbB-1, Receptor tyrosine-protein kinase erbB-1	-0.798329	-2.63776
Q9GZR7	DDX24	ATP-dependent RNA helicase DDX24, 3.6.4.13, DEAD box protein 24	0.354046	-1.70577		O15344	MID1	E3 ubiquitin-protein ligase Midline-1, 2.3.2.27, Midin, Putative transcription factor XPRF, RING finger protein 59, RING finger protein Midline-1, RING-type E3 ubiquitin transferase Midline-1, Tripartite motif-containing protein 18	-1.20885	-4.22407
Q6PKG0	LARP1	La-related protein 1, La ribonucleoprotein domain family member 1	0.557645	-1.1285		O95239	KIF4A	Chromosome-associated kinesin KIF4A, Chromokinesin-A	-1.23928	-3.69474
Q07020	RPL18	60S ribosomal protein L18, Large ribosomal subunit protein eL18	-0.828336	-1.81109		P82930	MRPS34	28S ribosomal protein S34, mitochondrial, MRP-S34, S34mt, Mitochondrial small ribosomal subunit protein mS34	-1.50087	-3.26834
Q9Y5J1	UTP18	U3 small nucleolar RNA-associated protein 18 homolog, WD repeat-containing protein 50	0.0812856	-1.87747		Q9NZJ4	SACS	Sacsin, DnaJ homolog subfamily C member 29, DNAJC29	-2.01642	-4.46617
Q9NVS2	MRPS18A	39S ribosomal protein S18a, mitochondrial, MRP-S18-a, Mrps18a, S18mt-a, 39S ribosomal protein S18-3, mitochondrial, MRP-S18-3, Mitochondrial large ribosomal subunit protein bS18a, Mitochondrial large ribosomal subunit protein mL66	0.928103	-1.37654		P31327	CPS1	Carbamoyl-phosphate synthase [ammonia], mitochondrial, 6.3.4.16, Carbamoyl-phosphate synthetase I, CPSase I	-1.31784	-1.73084
P48634	PRRC2A	Protein PRRC2A, HLA-B-associated transcript 2, Large proline-rich protein BAT2, Proline-rich and coiled-coil-containing protein 2A, Protein G2	0.850312	-1.26922		P40938	RFC3	Replication factor C subunit 3, Activator 1 38 kDa subunit, A1 38 kDa subunit, Activator 1 subunit 3, Replication factor C 38 kDa subunit, RF-C 38 kDa subunit, RFC38	-2.1676	-4.42558
P78332	RBM6	RNA-binding protein 6, Lung cancer antigen NY-LU-12, Protein G16, RNA-binding motif protein 6, RNA-binding protein DEF-3	1.03885	-1.62637		Q8TBB5	KLHDC4	Kelch domain-containing protein 4	-0.280217	-2.94607
O60869	EDF1	Endothelial differentiation-related factor 1, EDF-1, Multiprotein-bridging factor 1, MBF1	-0.216009	-1.72194		Q8WWK9	CKAP2	Cytoskeleton-associated protein 2, CTCL tumor antigen se20-10, Tumor- and microtubule-associated protein	-0.278716	-3.23941
Q86U42	PABPN1	Polyadenylate-binding protein 2, PABP-2, Poly(A)-binding protein 2, Nuclear poly(A)-binding protein 1, Poly(A)-binding protein II, PABII, Polyadenylate-binding nuclear protein 1	0.266575	-2.09873		O00116	AGPS	Alkyldihydroxyacetonephosphate synthase, peroxisomal, Alkyl-DHAP synthase, 2.5.1.26, Aging-associated gene 5 protein, Alkylglycerone-phosphate synthase	-2.65175	-4.72163
Q86W50	METTL16	RNA N6-adenosine-methyltransferase METTL16, Methyltransferase 10 domain-containing protein, Methyltransferase-like protein 16, N6-adenosine-methyltransferase METTL16, 2.1.1.348, U6 small nuclear RNA (adenine-(43)-N(6))-methyltransferase, 2.1.1.346	0.745594	-2.0447		P11498	PC	Pyruvate carboxylase, mitochondrial, 6.4.1.1, Pyruvic carboxylase, PCB	-1.9178	-3.54908
P41214	EIF2D	Eukaryotic translation initiation factor 2D, eIF2d, Hepatocellular carcinoma-associated antigen 56, Ligatin	0.542578	-2.34834		Q00653	NFKB2	Nuclear factor NF-kappa-B p100 subunit, DNA-binding factor KBF2, H2TF1, Lymphocyte translocation chromosome 10 protein, Nuclear factor of kappa light polypeptide gene enhancer in B-cells 2, Oncogene Lyt-10, Lyt10	-1.09858	-3.60307
Q03701	CEBPZ	CCAAT/enhancer-binding protein zeta, CCAAT-box-binding transcription factor, CBF, CCAAT-binding factor	0.42633	-1.57384		P16435	POR	NADPH--cytochrome P450 reductase, CPR, P450R, 1.6.2.4	-1.5148	-2.57235
Q9NZM5	NOP53	Ribosome biogenesis protein NOP53, Glioma tumor suppressor candidate region gene 2 protein, Protein interacting with carboxyl terminus 1, PICT-1, p60	0.186892	-2.07295		Q00325	SLC25A3	Phosphate carrier protein, mitochondrial, Phosphate transport protein, PTP, Solute carrier family 25 member 3	-2.16716	-2.9758
Q7Z2W4	ZC3HAV1	Zinc finger CCCH-type antiviral protein 1, ADP-ribosyltransferase diphtheria toxin-like 13, ARTD13, Inactive Poly [ADP-ribose] polymerase 13, PARP13, Zinc finger CCCH domain-containing protein 2, Zinc finger antiviral protein, ZAP	0.815811	-0.790168		P25391	LAMA1	Laminin subunit alpha-1, Laminin A chain, Laminin-1 subunit alpha, Laminin-3 subunit alpha, S-laminin subunit alpha, S-LAM alpha	-0.38078	-3.25901
P62308	SNRPG	Small nuclear ribonucleoprotein G, snRNP-G, Sm protein G, Sm-G, SmG	0.585592	-1.99842		Q9BPX3	NCAPG	Condensin complex subunit 3, Chromosome-associated protein G, Condensin subunit CAP-G, hCAP-G, Melanoma antigen NY-MEL-3, Non-SMC condensin I complex subunit G, XCAP-G homolog	-1.81943	-3.50143
P42766	RPL35	60S ribosomal protein L35, Large ribosomal subunit protein uL29	-0.968382	-2.09042		Q96AC1	FERMT2	Fermitin family homolog 2, Kindlin-2, Mitogen-inducible gene 2 protein, MIG-2, Pleckstrin homology domain-containing family C member 1, PH domain-containing family C member 1	-0.343325	-1.87016
P62266	RPS23	40S ribosomal protein S23, Small ribosomal subunit protein uS12	-0.587409	-1.86183		Q9H0H5	RACGAP1	Rac GTPase-activating protein 1, Male germ cell RacGap, MgcRacGAP, Protein CYK4 homolog, CYK4, HsCYK-4	-0.0524092	-2.36257
Q07065	CKAP4	Cytoskeleton-associated protein 4, 63-kDa cytoskeleton-linking membrane protein, Climp-63, p63	0.249421	-1.69663		Q9H9A6	LRRC40	Leucine-rich repeat-containing protein 40	-0.690407	-2.45464
O43251	RBFOX2	RNA binding protein fox-1 homolog 2, Fox-1 homolog B, Hexaribonucleotide-binding protein 2, RNA-binding motif protein 9, RNA-binding protein 9, Repressor of tamoxifen transcriptional activity	0.81035	-1.62081		P49915	GMPS	GMP synthase [glutamine-hydrolyzing], 6.3.5.2, GMP synthetase, Glutamine amidotransferase	-0.557576	-1.76815
Q12874	SF3A3	Splicing factor 3A subunit 3, SF3a60, Spliceosome-associated protein 61, SAP 61	0.0732042	-1.78026		Q8WUM4	PDCD6IP	Programmed cell death 6-interacting protein, PDCD6-interacting protein, ALG-2-interacting protein 1, ALG-2-interacting protein X, Hp95	-1.944	-3.15626
P52756	RBM5	RNA-binding protein 5, Protein G15, Putative tumor suppressor LUCA15, RNA-binding motif protein 5, Renal carcinoma antigen NY-REN-9	1.2155	-1.77427		P05556	ITGB1	Integrin beta-1, Fibronectin receptor subunit beta, Glycoprotein IIa, GPIIA, VLA-4 subunit beta, CD29	-0.928926	-2.19246
Q8N1G4	LRRC47	Leucine-rich repeat-containing protein 47	0.4044	-1.76396		Q15058	KIF14	Kinesin-like protein KIF14	-0.0422132	-2.88005
Q9NW13	RBM28	RNA-binding protein 28, RNA-binding motif protein 28	0.754313	-0.948146		O75165	DNAJC13	DnaJ homolog subfamily C member 13, Required for receptor-mediated endocytosis 8, RME-8	-1.83432	-4.43612
P78316	NOP14	Nucleolar protein 14, Nucleolar complex protein 14	0.327003	-1.86096		Q96FS4	SIPA1	Signal-induced proliferation-associated protein 1, Sipa-1, GTPase-activating protein Spa-1, p130 SPA-1	-1.50968	-4.22815
Q96PU8	QKI	KH domain-containing RNA-binding protein QKI, Protein quaking, Hqk, HqkI	0.720968	-2.77331		P50213	IDH3A	Isocitrate dehydrogenase [NAD] subunit alpha, mitochondrial, 1.1.1.41, Isocitric dehydrogenase subunit alpha, NAD(+)-specific ICDH subunit alpha	-1.6472	-3.42188
P55265	ADAR	Double-stranded RNA-specific adenosine deaminase, DRADA, 3.5.4.37, 136 kDa double-stranded RNA-binding protein, p136, Interferon-inducible protein 4, IFI-4, K88DSRBP	0.228179	-1.32702		O60488	ACSL4	Long-chain-fatty-acid--CoA ligase 4, 6.2.1.3, Arachidonate--CoA ligase, 6.2.1.15, Long-chain acyl-CoA synthetase 4, LACS 4	-1.88588	-3.51318
Q96GQ7	DDX27	Probable ATP-dependent RNA helicase DDX27, 3.6.4.13, DEAD box protein 27	0.414333	-1.27108		Q9BW27	NUP85	Nuclear pore complex protein Nup85, 85 kDa nucleoporin, FROUNT, Nucleoporin Nup75, Nucleoporin Nup85, Pericentrin-1	-1.54255	-3.56429
Q1KMD3	HNRNPUL2	Heterogeneous nuclear ribonucleoprotein U-like protein 2, Scaffold-attachment factor A2, SAF-A2	0.685736	-1.33716		P40939	HADHA	Trifunctional enzyme subunit alpha, mitochondrial, 78 kDa gastrin-binding protein, Monolysocardiolipin acyltransferase, 2.3.1.-, TP-alpha, Long-chain enoyl-CoA hydratase, 4.2.1.17, Long chain 3-hydroxyacyl-CoA dehydrogenase, 1.1.1.211	-1.72285	-3.06881
Q15269	PWP2	Periodic tryptophan protein 2 homolog	0.534758	-1.29466		Q02218	OGDH	2-oxoglutarate dehydrogenase complex component E1, E1o, OGDC-E1, OGDH-E1, 1.2.4.2, 2-oxoglutarate dehydrogenase, mitochondrial, Alpha-ketoglutarate dehydrogenase, Alpha-KGDH-E1, Thiamine diphosphate (ThDP)-dependent 2-oxoglutarate dehydrogenase	-1.3294	-3.09967
O43896	KIF1C	Kinesin-like protein KIF1C	0.968451	-2.16607		P23919	DTYMK	Thymidylate kinase, 2.7.4.9, dTMP kinase	-0.97686	-2.32804
Q9UNQ2	DIMT1	Probable dimethyladenosine transferase, 2.1.1.183, DIM1 dimethyladenosine transferase 1 homolog, DIM1 dimethyladenosine transferase 1-like, Probable 18S rRNA (adenine(1779)-N(6)/adenine(1780)-N(6))-dimethyltransferase, Probable 18S rRNA dimethylase, Probable S-adenosylmethionine-6-N',N'-adenosyl(rRNA) dimethyltransferase	-0.206284	-2.52719		P35520	CBS	Cystathionine beta-synthase, 4.2.1.22, Beta-thionase, Serine sulfhydrase	-1.98275	-3.74406
Q9BQ04	RBM4B	RNA-binding protein 4B, RNA-binding motif protein 30, RNA-binding motif protein 4B, RNA-binding protein 30	1.40335	-2.50393		O15143	ARPC1B	Actin-related protein 2/3 complex subunit 1B, Arp2/3 complex 41 kDa subunit, p41-ARC	-1.44133	-2.9362
O75691	UTP20	Small subunit processome component 20 homolog, Down-regulated in metastasis protein, Novel nucleolar protein 73, NNP73, Protein Key-1A6	0.345162	-1.32		Q5JRX3	PITRM1	Presequence protease, mitochondrial, hPreP, 3.4.24.-, Pitrilysin metalloproteinase 1, Metalloprotease 1, hMP1	-1.76191	-4.12382
P46781	RPS9	40S ribosomal protein S9, Small ribosomal subunit protein uS4	-0.513871	-1.32		P35606	COPB2	Coatomer subunit beta', Beta'-coat protein, Beta'-COP, p102	-1.2539	-2.52734
Q9BY77	POLDIP3	Polymerase delta-interacting protein 3, 46 kDa DNA polymerase delta interaction protein, p46, S6K1 Aly/REF-like target, SKAR	0.0398436	-1.91599		Q9HD67	MYO10	Unconventional myosin-X, Unconventional myosin-10	-1.06277	-4.37218
Q96T58	SPEN	Msx2-interacting protein, SMART/HDAC1-associated repressor protein, SPEN homolog	1.18712	-0.941735		Q02241	KIF23	Kinesin-like protein KIF23, Kinesin-like protein 5, Mitotic kinesin-like protein 1	-0.0978253	-2.35506
O95478	NSA2	Ribosome biogenesis protein NSA2 homolog, Hairy cell leukemia protein 1, TGF-beta-inducible nuclear protein 1	0.378433	-1.70704		Q15021	NCAPD2	Condensin complex subunit 1, Chromosome condensation-related SMC-associated protein 1, Chromosome-associated protein D2, hCAP-D2, Non-SMC condensin I complex subunit D2, XCAP-D2 homolog	-1.46135	-2.91458
Q9Y3Y2	CHTOP	Chromatin target of PRMT1 protein, Friend of PRMT1 protein, Small arginine- and glycine-rich protein, SRAG	0.426861	-1.74871		Q9NU22	MDN1	Midasin, Dynein-related AAA-ATPase MDN1, MIDAS-containing protein	-0.212443	-2.82195
P62899	RPL31	60S ribosomal protein L31, Large ribosomal subunit protein eL31	-0.0629905	-0.955492		O75962	TRIO	Triple functional domain protein, 2.7.11.1, PTPRF-interacting protein	-0.651686	-3.77632
O00425	IGF2BP3	Insulin-like growth factor 2 mRNA-binding protein 3, IGF2 mRNA-binding protein 3, IMP-3, IGF-II mRNA-binding protein 3, KH domain-containing protein overexpressed in cancer, hKOC, VICKZ family member 3	0.674081	-1.09064		O00159	MYO1C	Unconventional myosin-Ic, Myosin I beta, MMI-beta, MMIb	-2.10453	-3.49167
P46087	NOP2	Probable 28S rRNA (cytosine(4447)-C(5))-methyltransferase, 2.1.1.-, Nucleolar protein 1, Nucleolar protein 2 homolog, Proliferating-cell nucleolar antigen p120, Proliferation-associated nucleolar protein p120	-0.0259998	-1.34228		Q15392	DHCR24	Delta(24)-sterol reductase, 1.3.1.72, 24-dehydrocholesterol reductase, 3-beta-hydroxysterol Delta-24-reductase, Diminuto/dwarf1 homolog, Seladin-1	-0.390853	-2.24183
Q96EY7	PTCD3	Pentatricopeptide repeat domain-containing protein 3, mitochondrial, 28S ribosomal protein S39, mitochondrial, MRP-S39, Mitochondrial small ribosomal subunit protein mS39, Transformation-related gene 15 protein, TRG-15	0.554711	-1.14748		P25205	MCM3	DNA replication licensing factor MCM3, 3.6.4.12, DNA polymerase alpha holoenzyme-associated protein P1, P1-MCM3, RLF subunit beta, p102	-1.5847	-2.82228
Q969S3	ZNF622	Cytoplasmic 60S subunit biogenesis factor ZNF622, Zinc finger protein 622, Zinc finger-like protein 9	0.314372	-1.97356		Q13619	CUL4A	Cullin-4A, CUL-4A	-1.98072	-3.3012
Q8IWR0	ZC3H7A	Zinc finger CCCH domain-containing protein 7A	1.44747	-1.65862		Q6KC79	NIPBL	Nipped-B-like protein, Delangin, SCC2 homolog	-0.622214	-3.04043
Q9H7B2	RPF2	Ribosome production factor 2 homolog, Brix domain-containing protein 1, Ribosome biogenesis protein RPF2 homolog	0.185916	-1.6384		Q13045	FLII	Protein flightless-1 homolog	-1.61943	-3.20733
Q9H000	MKRN2	E3 ubiquitin-protein ligase makorin-2, 2.3.2.27, RING finger protein 62, RING-type E3 ubiquitin transferase makorin-2	0.501817	-2.89546		P28331	NDUFS1	NADH-ubiquinone oxidoreductase 75 kDa subunit, mitochondrial, 7.1.1.2, Complex I-75kD, CI-75kD	-1.87465	-3.85943
P79522	PRR3	Proline-rich protein 3, MHC class I region proline-rich protein CAT56	1.84173	-2.45476		Q14160	SCRIB	Protein scribble homolog, Scribble, hScrib, Protein LAP4	-0.654079	-3.28604
Q96MU7	YTHDC1	YTH domain-containing protein 1, Splicing factor YT521, YT521-B	0.290304	-1.95332		Q9NTI5	PDS5B	Sister chromatid cohesion protein PDS5 homolog B, Androgen-induced proliferation inhibitor, Androgen-induced prostate proliferative shutoff-associated protein AS3	-1.22283	-3.45585
P63244	RACK1	Receptor of activated protein C kinase 1, Cell proliferation-inducing gene 21 protein, Guanine nucleotide-binding protein subunit beta-2-like 1, Guanine nucleotide-binding protein subunit beta-like protein 12.3, Human lung cancer oncogene 7 protein, HLC-7, Receptor for activated C kinase, Small ribosomal subunit protein RACK1	-0.626988	-1.4639		P29401	TKT	Transketolase, TK, 2.2.1.1	-1.94982	-2.10219
Q8N3Z6	ZCCHC7	Zinc finger CCHC domain-containing protein 7, TRAMP-like complex RNA-binding factor ZCCHC7	0.964756	-2.70148		P52789	HK2	Hexokinase-2, 2.7.1.1, Hexokinase type II, HK II, Hexokinase-B, Muscle form hexokinase	-1.82835	-3.20538
Q9Y4Z0	LSM4	U6 snRNA-associated Sm-like protein LSm4, Glycine-rich protein, GRP	-0.102072	-2.61112		Q9Y490	TLN1	Talin-1	-1.04869	-2.29149
Q8IWZ3	ANKHD1	Ankyrin repeat and KH domain-containing protein 1, HIV-1 Vpr-binding ankyrin repeat protein, Multiple ankyrin repeats single KH domain, hMASK	0.483137	-2.22025		P57740	NUP107	Nuclear pore complex protein Nup107, 107 kDa nucleoporin, Nucleoporin Nup107	-1.09116	-2.81947
P61254	RPL26	60S ribosomal protein L26, Large ribosomal subunit protein uL24	-0.104143	-0.900829		P49189	ALDH9A1	4-trimethylaminobutyraldehyde dehydrogenase, TMABA-DH, TMABALDH, 1.2.1.47, Aldehyde dehydrogenase E3 isozyme, Aldehyde dehydrogenase family 9 member A1, 1.2.1.3, Gamma-aminobutyraldehyde dehydrogenase, 1.2.1.19, R-aminobutyraldehyde dehydrogenase	-2.0265	-3.60185
Q99590	SCAF11	Protein SCAF11, CTD-associated SR protein 11, Renal carcinoma antigen NY-REN-40, SC35-interacting protein 1, SR-related and CTD-associated factor 11, SRSF2-interacting protein, Serine/arginine-rich splicing factor 2-interacting protein, Splicing factor, arginine/serine-rich 2-interacting protein, Splicing regulatory protein 129, SRrp129	0.482605	-2.1501		O95347	SMC2	Structural maintenance of chromosomes protein 2, SMC protein 2, SMC-2, Chromosome-associated protein E, hCAP-E, XCAP-E homolog	-1.37591	-2.69092
Q96P11	NSUN5	28S rRNA (cytosine-C(5))-methyltransferase, 2.1.1.-, NOL1-related protein, NOL1R, NOL1/NOP2/Sun domain family member 5, Williams-Beuren syndrome chromosomal region 20A protein	0.845428	-1.55358		P42224	STAT1	Signal transducer and activator of transcription 1-alpha/beta, Transcription factor ISGF-3 components p91/p84	-1.60231	-3.53016
Q96AG4	LRRC59	Leucine-rich repeat-containing protein 59, Ribosome-binding protein p34, p34	-0.323017	-1.98628		Q13085	ACACA	Acetyl-CoA carboxylase 1, ACC1, 6.4.1.2, Acetyl-Coenzyme A carboxylase alpha, ACC-alpha	-1.64092	-3.53383
O43159	RRP8	Ribosomal RNA-processing protein 8, 2.1.1.-, Cerebral protein 1, Nucleomethylin	0.523818	-1.77664		P30084	ECHS1	Enoyl-CoA hydratase, mitochondrial, mECH, mECH1, 4.2.1.17, 5.3.3.8, Enoyl-CoA hydratase 1, ECHS1, Short-chain enoyl-CoA hydratase, SCEH	-0.802266	-2.30672
O75821	EIF3G	Eukaryotic translation initiation factor 3 subunit G, eIF3g, Eukaryotic translation initiation factor 3 RNA-binding subunit, eIF-3 RNA-binding subunit, Eukaryotic translation initiation factor 3 subunit 4, eIF-3-delta, eIF3 p42, eIF3 p44	-0.0248558	-1.61442		Q9NQW6	ANLN	Anillin	-0.965378	-3.14359
P98175	RBM10	RNA-binding protein 10, G patch domain-containing protein 9, RNA-binding motif protein 10, RNA-binding protein S1-1, S1-1	0.804448	-1.37955		P11172	UMPS	Uridine 5'-monophosphate synthase, UMP synthase, Orotate phosphoribosyltransferase, OPRT, OPRTase, 2.4.2.10, Orotidine 5'-phosphate decarboxylase, ODC, OMPD, 4.1.1.23, OMPdecase	-1.45814	-3.10815
Q8NE71	ABCF1	ATP-binding cassette sub-family F member 1, ATP-binding cassette 50, TNF-alpha-stimulated ABC protein	0.291698	-1.2902		Q9H3U1	UNC45A	Protein unc-45 homolog A, Unc-45A, GCUNC-45, Smooth muscle cell-associated protein 1, SMAP-1	-1.5311	-3.36482
P20290	BTF3	Transcription factor BTF3, Nascent polypeptide-associated complex subunit beta, NAC-beta, RNA polymerase B transcription factor 3	-0.519216	-1.80624		P41250	GARS1	Glycine--tRNA ligase, 6.1.1.14, Diadenosine tetraphosphate synthetase, Ap4A synthetase, 2.7.7.-, Glycyl-tRNA synthetase, GlyRS, Glycyl-tRNA synthetase 1	-1.73703	-2.79976
Q9NRA8	EIF4ENIF1	Eukaryotic translation initiation factor 4E transporter, 4E-T, eIF4E transporter, Eukaryotic translation initiation factor 4E nuclear import factor 1	0.888123	-3.02155		Q96TA1	NIBAN2	Protein Niban 2, Meg-3, Melanoma invasion by ERK, MINERVA, Niban-like protein 1, Protein FAM129B	-1.73694	-3.21926
Q15050	RRS1	Ribosome biogenesis regulatory protein homolog	0.452459	-1.35864		Q06210	GFPT1	Glutamine--fructose-6-phosphate aminotransferase [isomerizing] 1, 2.6.1.16, D-fructose-6-phosphate amidotransferase 1, Glutamine:fructose-6-phosphate amidotransferase 1, GFAT 1, GFAT1, Hexosephosphate aminotransferase 1	-1.78358	-3.11893
Q15637	SF1	Splicing factor 1, Mammalian branch point-binding protein, BBP, mBBP, Transcription factor ZFM1, Zinc finger gene in MEN1 locus, Zinc finger protein 162	0.468719	-1.47674		P07195	LDHB	L-lactate dehydrogenase B chain, LDH-B, 1.1.1.27, LDH heart subunit, LDH-H, Renal carcinoma antigen NY-REN-46	-2.12228	-2.06358
Q8NCA5	FAM98A	Protein FAM98A	0.798903	-1.84084		A0AVT1	UBA6	Ubiquitin-like modifier-activating enzyme 6, Ubiquitin-activating enzyme 6, 6.2.1.45, Monocyte protein 4, MOP-4, Ubiquitin-activating enzyme E1-like protein 2, E1-L2	-1.2103	-3.3643
Q5T653	MRPL2	39S ribosomal protein L2, mitochondrial, L2mt, MRP-L2, Mitochondrial large ribosomal subunit protein uL2m	0.804403	-1.77131		Q9NR09	BIRC6	Baculoviral IAP repeat-containing protein 6, 2.3.2.27, BIR repeat-containing ubiquitin-conjugating enzyme, BRUCE, RING-type E3 ubiquitin transferase BIRC6, Ubiquitin-conjugating BIR domain enzyme apollon, APOLLON	-0.196069	-3.01218
O60306	AQR	RNA helicase aquarius, 3.6.4.13, Intron-binding protein of 160 kDa, IBP160	0.579076	-1.59878		P11413	G6PD	Glucose-6-phosphate 1-dehydrogenase, G6PD, 1.1.1.49	-1.98135	-2.94445
Q9BYK8	HELZ2	Helicase with zinc finger domain 2, ATP-dependent helicase PRIC285, Helicase with zinc finger 2, transcriptional coactivator, PPAR-alpha-interacting complex protein 285, PPAR-gamma DNA-binding domain-interacting protein 1, PDIP1, PPAR-gamma DBD-interacting protein 1, Peroxisomal proliferator-activated receptor A-interacting complex 285 kDa protein, 3.6.4.-	0.931044	-2.15146		Q9NUQ3	TXLNG	Gamma-taxilin, Environmental lipopolysaccharide-responding gene protein, Factor inhibiting ATF4-mediated transcription, FIAT, Lipopolysaccharide-specific response protein 5	-0.659808	-2.6988
O75153	CLUH	Clustered mitochondria protein homolog	-0.0178538	-1.45821		P06576	ATP5F1B	ATP synthase subunit beta, mitochondrial, 7.1.2.2, ATP synthase F1 subunit beta	-1.55485	-2.15291
Q9H2U1	DHX36	ATP-dependent DNA/RNA helicase DHX36, 3.6.4.12, 3.6.4.13, DEAD/H box polypeptide 36, DEAH-box protein 36, G4-resolvase-1, G4R1, MLE-like protein 1, RNA helicase associated with AU-rich element protein	0.368584	-1.9121		Q66K14	TBC1D9B	TBC1 domain family member 9B	-1.34842	-4.16071
Q9H8H2	DDX31	Probable ATP-dependent RNA helicase DDX31, 3.6.4.13, DEAD box protein 31, Helicain	0.18098	-2.11504		P55060	CSE1L	Exportin-2, Exp2, Cellular apoptosis susceptibility protein, Chromosome segregation 1-like protein, Importin-alpha re-exporter	-1.99969	-2.85179
P12956	XRCC6	X-ray repair cross-complementing protein 6, 3.6.4.-, 4.2.99.-, 5'-deoxyribose-5-phosphate lyase Ku70, 5'-dRP lyase Ku70, 70 kDa subunit of Ku antigen, ATP-dependent DNA helicase 2 subunit 1, ATP-dependent DNA helicase II 70 kDa subunit, CTC box-binding factor 75 kDa subunit, CTC75, CTCBF, DNA repair protein XRCC6, Lupus Ku autoantigen protein p70, Ku70, Thyroid-lupus autoantigen, TLAA, X-ray repa…	-0.2349	-1.37506		Q01650	SLC7A5	Large neutral amino acids transporter small subunit 1, 4F2 light chain, 4F2 LC, 4F2LC, CD98 light chain, Integral membrane protein E16, E16, L-type amino acid transporter 1, hLAT1, Solute carrier family 7 member 5, y+ system cationic amino acid transporter	-2.00372	-2.76532
P19525	EIF2AK2	Interferon-induced, double-stranded RNA-activated protein kinase, 2.7.11.1, Eukaryotic translation initiation factor 2-alpha kinase 2, eIF-2A protein kinase 2, Interferon-inducible RNA-dependent protein kinase, P1/eIF-2A protein kinase, Protein kinase RNA-activated, PKR, Protein kinase R, Tyrosine-protein kinase EIF2AK2, 2.7.10.2, p68 kinase	-0.0886375	-2.2524		P38606	ATP6V1A	V-type proton ATPase catalytic subunit A, V-ATPase subunit A, 7.1.2.2, V-ATPase 69 kDa subunit, Vacuolar ATPase isoform VA68, Vacuolar proton pump subunit alpha	-2.07347	-3.52157
Q99575	POP1	Ribonucleases P/MRP protein subunit POP1, hPOP1	0.404739	-1.23795		Q14839	CHD4	Chromodomain-helicase-DNA-binding protein 4, CHD-4, 3.6.4.12, ATP-dependent helicase CHD4, Mi-2 autoantigen 218 kDa protein, Mi2-beta	-1.21008	-2.48072
Q12906	ILF3	Interleukin enhancer-binding factor 3, Double-stranded RNA-binding protein 76, DRBP76, M-phase phosphoprotein 4, MPP4, Nuclear factor associated with dsRNA, NFAR, Nuclear factor of activated T-cells 90 kDa, NF-AT-90, Translational control protein 80, TCP80	0.532705	-0.556161		Q9Y230	RUVBL2	RuvB-like 2, 3.6.4.12, 48 kDa TATA box-binding protein-interacting protein, 48 kDa TBP-interacting protein, 51 kDa erythrocyte cytosolic protein, ECP-51, INO80 complex subunit J, Repressing pontin 52, Reptin 52, TIP49b, TIP60-associated protein 54-beta, TAP54-beta	-2.19591	-3.19297
P60468	SEC61B	Protein transport protein Sec61 subunit beta	-0.246241	-2.52829		P13797	PLS3	Plastin-3, T-plastin	-1.36583	-2.44212
Q15032	R3HDM1	R3H domain-containing protein 1	1.54796	-2.08242		Q92598	HSPH1	Heat shock protein 105 kDa, Antigen NY-CO-25, Heat shock 110 kDa protein	-0.959519	-1.94305
P26373	RPL13	60S ribosomal protein L13, Breast basic conserved protein 1, Large ribosomal subunit protein eL13	-0.715737	-1.40886		P18206	VCL	Vinculin, Metavinculin, MV	-1.68081	-2.56847
P13010	XRCC5	X-ray repair cross-complementing protein 5, 3.6.4.-, 86 kDa subunit of Ku antigen, ATP-dependent DNA helicase 2 subunit 2, ATP-dependent DNA helicase II 80 kDa subunit, CTC box-binding factor 85 kDa subunit, CTC85, CTCBF, DNA repair protein XRCC5, Ku80, Ku86, Lupus Ku autoantigen protein p86, Nuclear factor IV, Thyroid-lupus autoantigen, TLAA, X-ray repair complementing defective repair in Chines…	-0.131679	-1.24245		Q66K74	MAP1S	Microtubule-associated protein 1S, MAP-1S, BPY2-interacting protein 1, Microtubule-associated protein 8, Variable charge Y chromosome 2-interacting protein 1, VCY2-interacting protein 1, VCY2IP-1	-0.465759	-3.12993
Q96QR8	PURB	Transcriptional activator protein Pur-beta, Purine-rich element-binding protein B	0.311361	-2.06559		P11586	MTHFD1	C-1-tetrahydrofolate synthase, cytoplasmic, C1-THF synthase, Epididymis secretory sperm binding protein, Methylenetetrahydrofolate dehydrogenase, 1.5.1.5, Methenyltetrahydrofolate cyclohydrolase, 3.5.4.9, Formyltetrahydrofolate synthetase, 6.3.4.3	-2.09352	-3.05981
Q86XP3	DDX42	ATP-dependent RNA helicase DDX42, 3.6.4.13, DEAD box protein 42, RNA helicase-like protein, RHELP, RNA helicase-related protein, RNAHP, SF3b DEAD box protein, Splicing factor 3B-associated 125 kDa protein, SF3b125	-0.244225	-2.21864		P78371	CCT2	T-complex protein 1 subunit beta, TCP-1-beta, CCT-beta	-2.02522	-2.57062
P23588	EIF4B	Eukaryotic translation initiation factor 4B, eIF-4B	0.406832	-0.485989		O00231	PSMD11	26S proteasome non-ATPase regulatory subunit 11, 26S proteasome regulatory subunit RPN6, 26S proteasome regulatory subunit S9, 26S proteasome regulatory subunit p44.5	-1.45771	-2.51809
P08865	RPSA	40S ribosomal protein SA, 37 kDa laminin receptor precursor, 37LRP, 37/67 kDa laminin receptor, LRP/LR, 67 kDa laminin receptor, 67LR, Colon carcinoma laminin-binding protein, Laminin receptor 1, LamR, Laminin-binding protein precursor p40, LBP/p40, Multidrug resistance-associated protein MGr1-Ag, NEM/1CHD4, Small ribosomal subunit protein uS2	-0.510533	-1.7823		Q9Y678	COPG1	Coatomer subunit gamma-1, Gamma-1-coat protein, Gamma-1-COP	-2.10184	-3.24859
O15042	U2SURP	U2 snRNP-associated SURP motif-containing protein, 140 kDa Ser/Arg-rich domain protein, U2-associated protein SR140	-0.279366	-1.28095		P50990	CCT8	T-complex protein 1 subunit theta, TCP-1-theta, CCT-theta, Chaperonin containing T-complex polypeptide 1 subunit 8, Renal carcinoma antigen NY-REN-15	-2.20491	-2.61296
Q86TG7	PEG10	Retrotransposon-derived protein PEG10, Embryonal carcinoma differentiation-regulated protein, Mammalian retrotransposon-derived protein 2, Myelin expression factor 3-like protein 1, MEF3-like protein 1, Paternally expressed gene 10 protein, Retrotransposon gag domain-containing protein 3, Retrotransposon-derived gag-like polyprotein, Ty3/Gypsy-like protein	0.588733	-2.19824		Q8TAT6	NPLOC4	Nuclear protein localization protein 4 homolog, Protein NPL4	-2.28159	-3.74627
Q7L014	DDX46	Probable ATP-dependent RNA helicase DDX46, 3.6.4.13, DEAD box protein 46, PRP5 homolog	-0.147561	-1.86136		Q86V48	LUZP1	Leucine zipper protein 1	-0.547394	-2.98679
Q7Z739	YTHDF3	YTH domain-containing family protein 3, DF3	0.335281	-1.80274		Q5T4S7	UBR4	E3 ubiquitin-protein ligase UBR4, 2.3.2.27, 600 kDa retinoblastoma protein-associated factor, N-recognin-4, RING-type E3 ubiquitin transferase UBR4, Retinoblastoma-associated factor of 600 kDa, RBAF600, p600, Zinc finger UBR1-type protein 1	-1.03455	-2.30791
Q15397	PUM3	Pumilio homolog 3, HBV X-transactivated gene 5 protein, HBV XAg-transactivated protein 5, Minor histocompatibility antigen HA-8, HLA-HA8	0.381106	-1.5803		Q99536	VAT1	Synaptic vesicle membrane protein VAT-1 homolog, 1.-.-.-	-2.3438	-3.64299
O00567	NOP56	Nucleolar protein 56, Nucleolar protein 5A	-0.0836218	-1.55239		P04083	ANXA1	Annexin A1, Annexin I, Annexin-1, Calpactin II, Calpactin-2, Chromobindin-9, Lipocortin I, Phospholipase A2 inhibitory protein, p35	-2.1664	-2.88489
Q13243	SRSF5	Serine/arginine-rich splicing factor 5, Delayed-early protein HRS, Pre-mRNA-splicing factor SRP40, Splicing factor, arginine/serine-rich 5	0.68276	-1.29043		P22102	GART	Trifunctional purine biosynthetic protein adenosine-3, Phosphoribosylamine--glycine ligase, 6.3.4.13, Glycinamide ribonucleotide synthetase, GARS, Phosphoribosylglycinamide synthetase, Phosphoribosylformylglycinamidine cyclo-ligase, 6.3.3.1, AIR synthase, AIRS, Phosphoribosyl-aminoimidazole synthetase, Phosphoribosylglycinamide formyltransferase, 2.1.2.2, 5'-phosphoribosylglycinamide transformyla…	-1.69693	-2.3568
P62277	RPS13	40S ribosomal protein S13, Small ribosomal subunit protein uS15	-0.651616	-1.52152		P22234	PAICS	Bifunctional phosphoribosylaminoimidazole carboxylase/phosphoribosylaminoimidazole succinocarboxamide synthetase, PAICS, Phosphoribosylaminoimidazole carboxylase, 4.1.1.21, AIR carboxylase, AIRC, Phosphoribosylaminoimidazole succinocarboxamide synthetase, 6.3.2.6, SAICAR synthetase	-2.48889	-3.13926
O00422	SAP18	Histone deacetylase complex subunit SAP18, 18 kDa Sin3-associated polypeptide, 2HOR0202, Cell growth-inhibiting gene 38 protein, Sin3-associated polypeptide p18	-0.330128	-2.36496		O00203	AP3B1	Adaptor-related protein complex 3 beta 1 subunit isoform 1	-1.06038	-2.46107
Q7Z417	NUFIP2	FMR1-interacting protein NUFIP2, 82 kDa FMRP-interacting protein, 82-FIP, Cell proliferation-inducing gene 1 protein, FMRP-interacting protein 2, Nuclear FMR1-interacting protein 2	0.587497	-1.61253		Q15645	TRIP13	Pachytene checkpoint protein 2 homolog, Human papillomavirus type 16 E1 protein-binding protein, 16E1-BP, HPV16 E1 protein-binding protein, Thyroid hormone receptor interactor 13, Thyroid receptor-interacting protein 13, TR-interacting protein 13, TRIP-13	-0.933559	-1.75504
O75152	ZC3H11A	Zinc finger CCCH domain-containing protein 11A	0.550759	-1.90078		O14646	CHD1	Chromodomain-helicase-DNA-binding protein 1, CHD-1, 3.6.4.12, ATP-dependent helicase CHD1	-0.503034	-2.61141
P50750	CDK9	Cyclin-dependent kinase 9, 2.7.11.22, 2.7.11.23, C-2K, Cell division cycle 2-like protein kinase 4, Cell division protein kinase 9, Serine/threonine-protein kinase PITALRE, Tat-associated kinase complex catalytic subunit	0.150935	-2.70675		P17858	PFKL	ATP-dependent 6-phosphofructokinase, liver type, ATP-PFK, PFK-L, 2.7.1.11, 6-phosphofructokinase type B, Phosphofructo-1-kinase isozyme B, PFK-B, Phosphohexokinase	-2.00149	-3.44766
Q8WTT2	NOC3L	Nucleolar complex protein 3 homolog, NOC3 protein homolog, Factor for adipocyte differentiation 24, NOC3-like protein, Nucleolar complex-associated protein 3-like protein	0.166968	-1.66975		P07437	TUBB	Tubulin beta chain, Tubulin beta-5 chain	-1.74883	-1.48438
Q5VYS8	TUT7	Terminal uridylyltransferase 7, TUTase 7, 2.7.7.52, Zinc finger CCHC domain-containing protein 6	0.798184	-2.05659		Q99832	CCT7	T-complex protein 1 subunit eta, TCP-1-eta, CCT-eta, HIV-1 Nef-interacting protein	-2.2429	-2.65255
P47813	EIF1AX	Eukaryotic translation initiation factor 1A, X-chromosomal, eIF-1A X isoform, Eukaryotic translation initiation factor 4C, eIF-4C	-0.50775	-2.06585		P23381	WARS1	Tryptophan--tRNA ligase, cytoplasmic, 6.1.1.2, Interferon-induced protein 53, IFP53, Tryptophanyl-tRNA synthetase, TrpRS, hWRS	-1.95986	-3.06623
Q9Y3A5	SBDS	Ribosome maturation protein SBDS, Shwachman-Bodian-Diamond syndrome protein	-0.607077	-2.1933		P53618	COPB1	Coatomer subunit beta, Beta-coat protein, Beta-COP	-1.77824	-2.88583
Q9NQ55	PPAN	Suppressor of SWI4 1 homolog, Ssf-1, Brix domain-containing protein 3, Peter Pan homolog	0.429764	-1.40022		P53396	ACLY	ATP-citrate synthase, 2.3.3.8, ATP-citrate (pro-S-)-lyase, ACL, Citrate cleavage enzyme	-2.30954	-2.63479
Q96KR1	ZFR	Zinc finger RNA-binding protein, hZFR, M-phase phosphoprotein homolog	0.44515	-1.56035		O43175	PHGDH	D-3-phosphoglycerate dehydrogenase, 3-PGDH, 1.1.1.95, 2-oxoglutarate reductase, 1.1.1.399, Malate dehydrogenase, 1.1.1.37	-2.34179	-2.517
Q14137	BOP1	Ribosome biogenesis protein BOP1, Block of proliferation 1 protein	-0.128358	-2.07468		Q01813	PFKP	ATP-dependent 6-phosphofructokinase, platelet type, ATP-PFK, PFK-P, 2.7.1.11, 6-phosphofructokinase type C, Phosphofructo-1-kinase isozyme C, PFK-C, Phosphohexokinase	-2.13065	-2.56528
Q92615	LARP4B	La-related protein 4B, La ribonucleoprotein domain family member 4B, La ribonucleoprotein domain family member 5, La-related protein 5	0.471045	-2.10089		Q86VP6	CAND1	Cullin-associated NEDD8-dissociated protein 1, Cullin-associated and neddylation-dissociated protein 1, TBP-interacting protein of 120 kDa A, TBP-interacting protein 120A, p120 CAND1	-2.30288	-2.8646
O00566	MPHOSPH10	U3 small nucleolar ribonucleoprotein protein MPP10, M phase phosphoprotein 10	0.211256	-1.87219		P60709	ACTB	Actin, cytoplasmic 1, 3.6.4.-, Beta-actin	-2.06468	-1.01556
Q8N163	CCAR2	Cell cycle and apoptosis regulator protein 2, Cell division cycle and apoptosis regulator protein 2, DBIRD complex subunit KIAA1967, Deleted in breast cancer gene 1 protein, DBC-1, DBC.1, NET35, p30 DBC	-0.0113281	-1.959		P51659	HSD17B4	Peroxisomal multifunctional enzyme type 2, MFE-2, 17-beta-hydroxysteroid dehydrogenase 4, 17-beta-HSD 4, D-bifunctional protein, DBP, Multifunctional protein 2, MFP-2, Short chain dehydrogenase/reductase family 8C member 1	-1.6981	-2.66176
Q8N8A6	DDX51	ATP-dependent RNA helicase DDX51, 3.6.4.13, DEAD box protein 51	0.36875	-2.82303		P00558	PGK1	Phosphoglycerate kinase 1, 2.7.2.3, Cell migration-inducing gene 10 protein, Primer recognition protein 2, PRP 2	-1.92357	-1.7425
Q13895	BYSL	Bystin	0.261485	-1.76994		P27708	CAD	CAD protein, Glutamine-dependent carbamoyl-phosphate synthase, 6.3.5.5, Aspartate carbamoyltransferase, 2.1.3.2, Dihydroorotase, 3.5.2.3	-0.124934	-1.06691
Q9NTZ6	RBM12	RNA-binding protein 12, RNA-binding motif protein 12, SH3/WW domain anchor protein in the nucleus, SWAN	0.227548	-2.18311		P17655	CAPN2	Calpain-2 catalytic subunit, 3.4.22.53, Calcium-activated neutral proteinase 2, CANP 2, Calpain M-type, Calpain large polypeptide L2, Calpain-2 large subunit, Millimolar-calpain, M-calpain	-0.682119	-1.8998
P60866	RPS20	40S ribosomal protein S20, Small ribosomal subunit protein uS10	-0.378055	-1.64036		P53621	COPA	Coatomer subunit alpha, Alpha-coat protein, Alpha-COP, HEP-COP, HEPCOP	-0.522823	-1.1529
Q9Y285	FARSA	Phenylalanine--tRNA ligase alpha subunit, 6.1.1.20, CML33, Phenylalanyl-tRNA synthetase alpha subunit, PheRS	-0.0365312	-1.89789		P32119	PRDX2	Peroxiredoxin-2, 1.11.1.24, Natural killer cell-enhancing factor B, NKEF-B, PRP, Thiol-specific antioxidant protein, TSA, Thioredoxin peroxidase 1, Thioredoxin-dependent peroxide reductase 1, Thioredoxin-dependent peroxiredoxin 2	-2.82823	-2.70504
Q9Y5A9	YTHDF2	YTH domain-containing family protein 2, DF2, CLL-associated antigen KW-14, High-glucose-regulated protein 8, Renal carcinoma antigen NY-REN-2	0.411003	-1.97815		P04406	GAPDH	Glyceraldehyde-3-phosphate dehydrogenase, GAPDH, 1.2.1.12, Peptidyl-cysteine S-nitrosylase GAPDH, 2.6.99.-	-2.7784	-1.55173
P78346	RPP30	Ribonuclease P protein subunit p30, RNaseP protein p30, RNase P subunit 2	-0.14439	-2.69184
Q9P031	CCDC59	Thyroid transcription factor 1-associated protein 26, TTF-1-associated protein 26, Coiled-coil domain-containing protein 59, TTF-1-associated protein BR2	0.572941	-2.23988
Q9HCD5	NCOA5	Nuclear receptor coactivator 5, NCoA-5, Coactivator independent of AF-2, CIA	-0.128288	-2.5819
Q9NY61	AATF	Protein AATF, Apoptosis-antagonizing transcription factor, Rb-binding protein Che-1	0.324546	-2.26557
P78344	EIF4G2	Eukaryotic translation initiation factor 4 gamma 2, eIF-4-gamma 2, eIF-4G 2, eIF4G 2, Death-associated protein 5, DAP-5, p97	-0.224351	-1.76137
P06748	NPM1	Nucleophosmin, NPM, Nucleolar phosphoprotein B23, Nucleolar protein NO38, Numatrin	-0.601211	-0.73889
P84103	SRSF3	Serine/arginine-rich splicing factor 3, Pre-mRNA-splicing factor SRP20, Splicing factor, arginine/serine-rich 3	0.605334	-0.567838
Q9ULX6	AKAP8L	A-kinase anchor protein 8-like, AKAP8-like protein, Helicase A-binding protein 95, HAP95, Homologous to AKAP95 protein, HA95, Neighbor of A-kinase-anchoring protein 95, Neighbor of AKAP95	0.731053	-2.07095
P25398	RPS12	40S ribosomal protein S12, Small ribosomal subunit protein eS12	-1.16031	-2.53154
P62318	SNRPD3	Small nuclear ribonucleoprotein Sm D3, Sm-D3, snRNP core protein D3	-0.518399	-2.10538
Q92499	DDX1	ATP-dependent RNA helicase DDX1, 3.6.4.13, DEAD box protein 1, DEAD box protein retinoblastoma, DBP-RB	-0.176154	-1.78383
Q15424	SAFB	Scaffold attachment factor B1, SAF-B, SAF-B1, HSP27 estrogen response element-TATA box-binding protein, HSP27 ERE-TATA-binding protein	0.385185	-1.28798
Q99613	EIF3C	Eukaryotic translation initiation factor 3 subunit C, eIF3c, Eukaryotic translation initiation factor 3 subunit 8, eIF3 p110	0.298136	-0.895396
O75533	SF3B1	Splicing factor 3B subunit 1, Pre-mRNA-splicing factor SF3b 155 kDa subunit, SF3b155, Spliceosome-associated protein 155, SAP 155	-0.0774671	-1.62765
Q5JSZ5	PRRC2B	Protein PRRC2B, HLA-B-associated transcript 2-like 1, Proline-rich coiled-coil protein 2B	0.83577	-2.25518
Q6IQ49	SDE2	Splicing regulator SDE2, Replication stress response regulator SDE2	0.310209	-2.70563
Q7Z478	DHX29	ATP-dependent RNA helicase DHX29, 3.6.4.13, DEAH box protein 29, Nucleic acid helicase DDXx	-0.254087	-2.19328
O43395	PRPF3	U4/U6 small nuclear ribonucleoprotein Prp3, Pre-mRNA-splicing factor 3, hPrp3, U4/U6 snRNP 90 kDa protein	-0.419095	-2.29373
Q8WVV9	HNRNPLL	Heterogeneous nuclear ribonucleoprotein L-like, hnRNPLL, Stromal RNA-regulating factor	0.856859	-1.78083
Q96SI9	STRBP	Spermatid perinuclear RNA-binding protein	0.547319	-1.97
Q8TB72	PUM2	Pumilio homolog 2, Pumilio-2	1.38446	-1.54877
Q9BZE1	MRPL37	39S ribosomal protein L37, mitochondrial, L37mt, MRP-L37, 39S ribosomal protein L2, mitochondrial, L2mt, MRP-L2, Mitochondrial large ribosomal subunit protein mL37	0.684653	-1.52701
Q4G0J3	LARP7	La-related protein 7, La ribonucleoprotein domain family member 7, hLARP7, P-TEFb-interaction protein for 7SK stability, PIP7S	1.02525	-1.30092
Q14498	RBM39	RNA-binding protein 39, CAPER alpha, CAPERalpha, Hepatocellular carcinoma protein 1, RNA-binding motif protein 39, RNA-binding region-containing protein 2, Splicing factor HCC1	0.321497	-1.28475
Q9P2N5	RBM27	RNA-binding protein 27, RNA-binding motif protein 27	0.377848	-2.32882
P62854	RPS26	40S ribosomal protein S26, Small ribosomal subunit protein eS26	0.0997669	-1.00542
Q9P275	USP36	Ubiquitin carboxyl-terminal hydrolase 36, 3.4.19.12, Deubiquitinating enzyme 36, Ubiquitin thioesterase 36, Ubiquitin-specific-processing protease 36	0.394639	-1.70034
O15226	NKRF	NF-kappa-B-repressing factor, NFkB-repressing factor, NRF, Protein ITBA4	0.447828	-1.50712
Q53F19	NCBP3	Nuclear cap-binding protein subunit 3, Protein ELG	-0.324763	-2.81868
Q9BQ39	DDX50	ATP-dependent RNA helicase DDX50, 3.6.4.13, DEAD box protein 50, Gu-beta, Nucleolar protein Gu2	-0.0187215	-2.46488
Q9BYD1	MRPL13	39S ribosomal protein L13, mitochondrial, L13mt, MRP-L13, Mitochondrial large ribosomal subunit protein uL13m	0.92929	-1.33662
Q96SB4	SRPK1	SRSF protein kinase 1, 2.7.11.1, SFRS protein kinase 1, Serine/arginine-rich protein-specific kinase 1, SR-protein-specific kinase 1	-0.420012	-2.45238
P46013	MKI67	Proliferation marker protein Ki-67, Antigen identified by monoclonal antibody Ki-67, Antigen KI-67, Antigen Ki67	0.339714	-0.976468
Q14694	USP10	Ubiquitin carboxyl-terminal hydrolase 10, 3.4.19.12, Deubiquitinating enzyme 10, Ubiquitin thioesterase 10, Ubiquitin-specific-processing protease 10	0.515812	-1.74537
Q6PJT7	ZC3H14	Zinc finger CCCH domain-containing protein 14, Mammalian suppressor of tau pathology-2, MSUT-2, Renal carcinoma antigen NY-REN-37	0.361185	-2.00151
Q8WU90	ZC3H15	Zinc finger CCCH domain-containing protein 15, DRG family-regulatory protein 1, Likely ortholog of mouse immediate early response erythropoietin 4	-0.314577	-2.52342
Q86TB9	PATL1	Protein PAT1 homolog 1, PAT1-like protein 1, Protein PAT1 homolog b, Pat1b, hPat1b	0.539958	-2.48849
P61313	RPL15	60S ribosomal protein L15, Large ribosomal subunit protein eL15	-0.963303	-1.92686
Q8WWY3	PRPF31	U4/U6 small nuclear ribonucleoprotein Prp31, Pre-mRNA-processing factor 31, Serologically defined breast cancer antigen NY-BR-99, U4/U6 snRNP 61 kDa protein, Protein 61K, hPrp31	0.0407143	-2.25671
O43670	ZNF207	BUB3-interacting and GLEBS motif-containing protein ZNF207, BuGZ, hBuGZ, Zinc finger protein 207	-0.337402	-2.58244
O75494	SRSF10	Serine/arginine-rich splicing factor 10, 40 kDa SR-repressor protein, SRrp40, FUS-interacting serine-arginine-rich protein 1, Splicing factor SRp38, Splicing factor, arginine/serine-rich 13A, TLS-associated protein with Ser-Arg repeats, TASR, TLS-associated protein with SR repeats, TLS-associated serine-arginine protein, TLS-associated SR protein	0.567957	-1.44421
Q71RC2	LARP4	La-related protein 4, La ribonucleoprotein domain family member 4	0.537857	-1.34622
Q9BVI4	NOC4L	Nucleolar complex protein 4 homolog, NOC4 protein homolog, NOC4-like protein, Nucleolar complex-associated protein 4-like protein	-0.383212	-2.85922
Q9NRW3	APOBEC3C	DNA dC->dU-editing enzyme APOBEC-3C, A3C, 3.5.4.38, APOBEC1-like, Phorbolin I	0.367476	-2.58945
Q9NUL3	STAU2	Double-stranded RNA-binding protein Staufen homolog 2	0.798302	-1.93303
Q8IWX8	CHERP	Calcium homeostasis endoplasmic reticulum protein, ERPROT 213-21, SR-related CTD-associated factor 6	-0.0180408	-1.80736
Q15061	WDR43	WD repeat-containing protein 43, U3 small nucleolar RNA-associated protein 5 homolog	-0.137931	-2.04041
Q9NRX1	PNO1	RNA-binding protein PNO1, Partner of NOB1	-0.400475	-2.74564
Q92667	AKAP1	A-kinase anchor protein 1, mitochondrial, A-kinase anchor protein 149 kDa, AKAP 149, Dual specificity A-kinase-anchoring protein 1, D-AKAP-1, Protein kinase A-anchoring protein 1, PRKA1, Spermatid A-kinase anchor protein 84, S-AKAP84	0.445428	-2.975
O43823	AKAP8	A-kinase anchor protein 8, AKAP-8, A-kinase anchor protein 95 kDa, AKAP 95	0.839093	-1.62501
Q96PZ0	PUS7	Pseudouridylate synthase 7 homolog, 5.4.99.-	-0.212179	-2.36917
Q9UHB9	SRP68	Signal recognition particle subunit SRP68, SRP68, Signal recognition particle 68 kDa protein	0.0416295	-1.9305
Q92979	EMG1	Ribosomal RNA small subunit methyltransferase NEP1, 2.1.1.-, 18S rRNA (pseudouridine(1248)-N1)-methyltransferase, 18S rRNA Psi1248 methyltransferase, Nucleolar protein EMG1 homolog, Protein C2f, Ribosome biogenesis protein NEP1	-0.669283	-2.47354
Q9H6R4	NOL6	Nucleolar protein 6, Nucleolar RNA-associated protein, Nrap	-0.194648	-2.0551
Q15691	MAPRE1	Microtubule-associated protein RP/EB family member 1, APC-binding protein EB1, End-binding protein 1, EB1	-0.739255	-2.80073
O95985	TOP3B	DNA topoisomerase 3-beta-1, 5.6.2.1, DNA topoisomerase III beta-1	0.735672	-2.08166
P61956	SUMO2	Small ubiquitin-related modifier 2, SUMO-2, HSMT3, SMT3 homolog 2, SUMO-3, Sentrin-2, Ubiquitin-like protein SMT3B, Smt3B	-0.447417	-2.03056
P55010	EIF5	Eukaryotic translation initiation factor 5, eIF-5	-0.737703	-2.62304
Q5JTH9	RRP12	RRP12-like protein	0.416729	-1.15779
Q09666	AHNAK	Neuroblast differentiation-associated protein AHNAK, Desmoyokin	-0.135783	-1.24375
Q9BUL9	RPP25	Ribonuclease P protein subunit p25, RNase P protein subunit p25	0.697002	-2.55885
Q9NXH9	TRMT1	tRNA (guanine(26)-N(2))-dimethyltransferase, 2.1.1.216, tRNA 2,2-dimethylguanosine-26 methyltransferase, tRNA(guanine-26,N(2)-N(2)) methyltransferase, tRNA(m(2,2)G26)dimethyltransferase	0.0446353	-2.13157
Q9Y3A4	RRP7A	Ribosomal RNA-processing protein 7 homolog A, Gastric cancer antigen Zg14	0.141396	-2.50625
Q9NV31	IMP3	U3 small nucleolar ribonucleoprotein protein IMP3, U3 snoRNP protein IMP3, BRMS2	0.195279	-2.61751
Q99700	ATXN2	Ataxin-2, Spinocerebellar ataxia type 2 protein, Trinucleotide repeat-containing gene 13 protein	0.419559	-2.25978
Q96D46	NMD3	60S ribosomal export protein NMD3, hNMD3	-0.068289	-2.16784
P42285	MTREX	Exosome RNA helicase MTR4, 3.6.4.13, ATP-dependent RNA helicase DOB1, ATP-dependent RNA helicase SKIV2L2, Superkiller viralicidic activity 2-like 2, TRAMP-like complex helicase	-0.299052	-2.13141
Q9UNX4	WDR3	WD repeat-containing protein 3	-0.194811	-2.30509
Q9H0J9	PARP12	Protein mono-ADP-ribosyltransferase PARP12, 2.4.2.-, ADP-ribosyltransferase diphtheria toxin-like 12, ARTD12, Poly [ADP-ribose] polymerase 12, PARP-12, Zinc finger CCCH domain-containing protein 1	0.9239	-1.64589
Q9BYG3	NIFK	MKI67 FHA domain-interacting nucleolar phosphoprotein, Nucleolar phosphoprotein Nopp34, Nucleolar protein interacting with the FHA domain of pKI-67, hNIFK	0.010868	-1.92333
Q9H2Y7	ZNF106	Zinc finger protein 106, Zfp-106, Zinc finger protein 474	0.343663	-3.11546
Q9BYD6	MRPL1	39S ribosomal protein L1, mitochondrial, L1mt, MRP-L1, Mitochondrial large ribosomal subunit protein uL1m	0.250032	-2.52661
Q15029	EFTUD2	116 kDa U5 small nuclear ribonucleoprotein component, Elongation factor Tu GTP-binding domain-containing protein 2, SNU114 homolog, hSNU114, U5 snRNP-specific protein, 116 kDa, U5-116 kDa	0.160317	-0.973399
Q8IUH3	RBM45	RNA-binding protein 45, Developmentally-regulated RNA-binding protein 1, RB-1, RNA-binding motif protein 45	0.997222	-1.99097
Q9NYF8	BCLAF1	Bcl-2-associated transcription factor 1, Btf, BCLAF1 and THRAP3 family member 1	0.453038	-1.20611
Q9BRU9	UTP23	rRNA-processing protein UTP23 homolog	0.230014	-3.01436
Q9Y4P3	TBL2	Transducin beta-like protein 2, WS beta-transducin repeats protein, WS-betaTRP, Williams-Beuren syndrome chromosomal region 13 protein	-0.144533	-2.5357
P26038	MSN	Moesin, Membrane-organizing extension spike protein	-1.04432	-1.67826
Q16630	CPSF6	Cleavage and polyadenylation specificity factor subunit 6, Cleavage and polyadenylation specificity factor 68 kDa subunit, CPSF 68 kDa subunit, Cleavage factor Im complex 68 kDa subunit, CFIm68, Pre-mRNA cleavage factor Im 68 kDa subunit, Protein HPBRII-4/7	0.0918527	-2.13928
Q14151	SAFB2	Scaffold attachment factor B2, SAF-B2	0.501251	-1.69231
Q6Y7W6	GIGYF2	GRB10-interacting GYF protein 2, PERQ amino acid-rich with GYF domain-containing protein 2, Trinucleotide repeat-containing gene 15 protein	0.370552	-2.01535
P82675	MRPS5	28S ribosomal protein S5, mitochondrial, MRP-S5, S5mt, Mitochondrial small ribosomal subunit protein uS5m	0.190218	-1.80614
Q9BXP5	SRRT	Serrate RNA effector molecule homolog, Arsenite-resistance protein 2	-0.128817	-1.86884
Q9UH17	APOBEC3B	DNA dC->dU-editing enzyme APOBEC-3B, A3B, 3.5.4.38, Phorbolin-1-related protein, Phorbolin-2/3	0.574827	-2.30883
Q86XZ4	SPATS2	Spermatogenesis-associated serine-rich protein 2, Serine-rich spermatocytes and round spermatid 59 kDa protein, p59scr	0.414737	-2.72203
P26196	DDX6	Probable ATP-dependent RNA helicase DDX6, 3.6.4.13, ATP-dependent RNA helicase p54, DEAD box protein 6, Oncogene RCK	-0.342777	-2.21826
Q5T8P6	RBM26	RNA-binding protein 26, CTCL tumor antigen se70-2, RNA-binding motif protein 26	0.162561	-1.95982
Q9Y2X3	NOP58	Nucleolar protein 58, Nucleolar protein 5	-0.0529517	-1.60428
Q6NZY4	ZCCHC8	Zinc finger CCHC domain-containing protein 8, TRAMP-like complex RNA-binding factor ZCCHC8	0.780578	-2.69784
Q5QJE6	DNTTIP2	Deoxynucleotidyltransferase terminal-interacting protein 2, Estrogen receptor-binding protein, LPTS-interacting protein 2, LPTS-RP2, Terminal deoxynucleotidyltransferase-interacting factor 2, TdIF2, TdT-interacting factor 2	-0.0240302	-2.06765
Q14258	TRIM25	E3 ubiquitin/ISG15 ligase TRIM25, 6.3.2.n3, Estrogen-responsive finger protein, RING finger protein 147, RING-type E3 ubiquitin transferase, 2.3.2.27, RING-type E3 ubiquitin transferase TRIM25, Tripartite motif-containing protein 25, Ubiquitin/ISG15-conjugating enzyme TRIM25, Zinc finger protein 147	0.242975	-1.51036
Q9NQZ2	UTP3	Something about silencing protein 10, Charged amino acid-rich leucine zipper 1, CRL1, Disrupter of silencing SAS10, UTP3 homolog	-0.140084	-2.58943
Q92552	MRPS27	28S ribosomal protein S27, mitochondrial, MRP-S27, S27mt, Mitochondrial ribosomal protein S27, Mitochondrial small ribosomal subunit protein mS27	0.161252	-1.03844
Q8IY81	FTSJ3	pre-rRNA 2'-O-ribose RNA methyltransferase FTSJ3, 2.1.1.-, Protein ftsJ homolog 3, Putative rRNA methyltransferase 3	0.156079	-1.53459
Q9H6S0	YTHDC2	3'-5' RNA helicase YTHDC2, 3.6.4.13, YTH domain-containing protein 2, hYTHDC2	0.551706	-1.70562
P62906	RPL10A	60S ribosomal protein L10a, CSA-19, Large ribosomal subunit protein uL1, Neural precursor cell expressed developmentally down-regulated protein 6, NEDD-6	-1.32299	-2.16987
Q96T37	RBM15	RNA-binding protein 15, One-twenty two protein 1, RNA-binding motif protein 15	1.18163	-1.01887
P60842	EIF4A1	Eukaryotic initiation factor 4A-I, eIF-4A-I, eIF4A-I, 3.6.4.13, ATP-dependent RNA helicase eIF4A-1	-0.842347	-1.30166
Q14684	RRP1B	Ribosomal RNA processing protein 1 homolog B, RRP1-like protein B	0.138631	-1.59429
Q8TBF4	ZCRB1	Zinc finger CCHC-type and RNA-binding motif-containing protein 1, U11/U12 small nuclear ribonucleoprotein 31 kDa protein, U11/U12 snRNP 31 kDa protein, U11/U12-31K	0.304285	-2.50696
P62826	RAN	GTP-binding nuclear protein Ran, 3.6.5.-, Androgen receptor-associated protein 24, GTPase Ran, Ras-like protein TC4, Ras-related nuclear protein	-1.24566	-1.74016
Q969X6	UTP4	U3 small nucleolar RNA-associated protein 4 homolog, Cirhin, UTP4 small subunit processome component	-0.160612	-2.11986
Q9H6R0	DHX33	ATP-dependent RNA helicase DHX33, 3.6.4.13, DEAH box protein 33	-0.122026	-2.66249
Q8IZH2	XRN1	5'-3' exoribonuclease 1, 3.1.13.-, Strand-exchange protein 1 homolog	-0.16951	-2.66869
P62829	RPL23	60S ribosomal protein L23, 60S ribosomal protein L17, Large ribosomal subunit protein uL14	-0.722047	-1.58537
Q8IY37	DHX37	Probable ATP-dependent RNA helicase DHX37, 3.6.4.13, DEAH box protein 37	0.167737	-2.4118
Q13838	DDX39B	Spliceosome RNA helicase DDX39B, 3.6.4.13, 56 kDa U2AF65-associated protein, ATP-dependent RNA helicase p47, DEAD box protein UAP56, HLA-B-associated transcript 1 protein	-1.00776	-2.20329
Q9BRZ2	TRIM56	E3 ubiquitin-protein ligase TRIM56, 2.3.2.27, RING finger protein 109, Tripartite motif-containing protein 56	0.6032	-3.30735
Q9P015	MRPL15	39S ribosomal protein L15, mitochondrial, L15mt, MRP-L15, Mitochondrial large ribosomal subunit protein uL15m	0.15775	-2.17133
Q9BWF3	RBM4	RNA-binding protein 4, Lark homolog, hLark, RNA-binding motif protein 4, RNA-binding motif protein 4a	0.822567	-1.04653
Q9H6T0	ESRP2	Epithelial splicing regulatory protein 2, RNA-binding motif protein 35B, RNA-binding protein 35B	1.11316	-1.51153
O43809	NUDT21	Cleavage and polyadenylation specificity factor subunit 5, Cleavage and polyadenylation specificity factor 25 kDa subunit, CPSF 25 kDa subunit, Cleavage factor Im complex 25 kDa subunit, CFIm25, Nucleoside diphosphate-linked moiety X motif 21, Nudix motif 21, Nudix hydrolase 21, Pre-mRNA cleavage factor Im 68 kDa subunit	-0.224498	-2.44658
Q9HC36	MRM3	rRNA methyltransferase 3, mitochondrial, 2.1.1.-, 16S rRNA (guanosine(1370)-2'-O)-methyltransferase, 16S rRNA [Gm1370] 2'-O-methyltransferase, RNA methyltransferase-like protein 1	0.120087	-2.40149
Q9UGP8	SEC63	Translocation protein SEC63 homolog	-0.173007	-2.33498
Q9UBU9	NXF1	Nuclear RNA export factor 1, Tip-associated protein, Tip-associating protein, mRNA export factor TAP	-0.0797494	-2.57052
P05198	EIF2S1	Eukaryotic translation initiation factor 2 subunit 1, Eukaryotic translation initiation factor 2 subunit alpha, eIF-2-alpha, eIF-2A, eIF-2alpha	-0.459303	-1.96033
Q9BXJ9	NAA15	N-alpha-acetyltransferase 15, NatA auxiliary subunit, Gastric cancer antigen Ga19, N-terminal acetyltransferase, NMDA receptor-regulated protein 1, Protein tubedown-1, Tbdn100	-0.353395	-1.95314
Q8IYB7	DIS3L2	DIS3-like exonuclease 2, hDIS3L2, 3.1.13.-	-0.162731	-2.60193
Q15459	SF3A1	Splicing factor 3A subunit 1, SF3a120, Spliceosome-associated protein 114, SAP 114	0.17078	-1.31213
Q7Z6E9	RBBP6	E3 ubiquitin-protein ligase RBBP6, 2.3.2.27, Proliferation potential-related protein, Protein P2P-R, RING-type E3 ubiquitin transferase RBBP6, Retinoblastoma-binding Q protein 1, RBQ-1, Retinoblastoma-binding protein 6, p53-associated cellular protein of testis	0.0618295	-2.51925
Q07955	SRSF1	Serine/arginine-rich splicing factor 1, Alternative-splicing factor 1, ASF-1, Splicing factor, arginine/serine-rich 1, pre-mRNA-splicing factor SF2, P33 subunit	0.212368	-1.03592
Q9H0S4	DDX47	Probable ATP-dependent RNA helicase DDX47, 3.6.4.13, DEAD box protein 47	-0.530948	-2.45417
P09001	MRPL3	39S ribosomal protein L3, mitochondrial, L3mt, MRP-L3, Mitochondrial large ribosomal subunit protein uL3m	0.315436	-1.9597
Q9BY44	EIF2A	Eukaryotic translation initiation factor 2A, eIF-2A, 65 kDa eukaryotic translation initiation factor 2A	-0.421933	-2.05098
Q9Y2W1	THRAP3	Thyroid hormone receptor-associated protein 3, BCLAF1 and THRAP3 family member 2, Thyroid hormone receptor-associated protein complex 150 kDa component, Trap150	0.430333	-1.17623
Q01081	U2AF1	Splicing factor U2AF 35 kDa subunit, U2 auxiliary factor 35 kDa subunit, U2 small nuclear RNA auxiliary factor 1, U2 snRNP auxiliary factor small subunit	-0.11132	-2.02436
Q9H9Y2	RPF1	Ribosome production factor 1, Brix domain-containing protein 5, Ribosome biogenesis protein RPF1	0.1249	-2.39254
Q7KZ85	SUPT6H	Transcription elongation factor SPT6, hSPT6, Histone chaperone suppressor of Ty6, Tat-cotransactivator 2 protein, Tat-CT2 protein	0.225931	-1.97292
Q04637	EIF4G1	Eukaryotic translation initiation factor 4 gamma 1, eIF-4-gamma 1, eIF-4G 1, eIF-4G1, p220	-0.250905	-1.37886
P62851	RPS25	40S ribosomal protein S25, Small ribosomal subunit protein eS25	-1.18809	-2.05622
P50579	METAP2	Methionine aminopeptidase 2, MAP 2, MetAP 2, 3.4.11.18, Initiation factor 2-associated 67 kDa glycoprotein, p67, p67eIF2, Peptidase M	-0.357447	-2.18383
Q5F1R6	DNAJC21	DnaJ homolog subfamily C member 21, DnaJ homolog subfamily A member 5, Protein GS3	-0.251797	-3.10352
O75683	SURF6	Surfeit locus protein 6	0.0976015	-2.11702
Q9BRL6	SRSF8	Serine/arginine-rich splicing factor 8, Pre-mRNA-splicing factor SRP46, Splicing factor SRp46, Splicing factor, arginine/serine-rich 2B	1.04469	-2.52611
Q7L2E3	DHX30	ATP-dependent RNA helicase DHX30, 3.6.4.13, DEAH box protein 30	0.480256	-0.971255
Q9P258	RCC2	Protein RCC2, RCC1-like protein TD-60, Telophase disk protein of 60 kDa	-0.937542	-2.36751
P18621	RPL17	60S ribosomal protein L17, 60S ribosomal protein L23, Large ribosomal subunit protein uL22, PD-1	-0.525063	-1.44969
P38919	EIF4A3	Eukaryotic initiation factor 4A-III, eIF-4A-III, eIF4A-III, 3.6.4.13, ATP-dependent RNA helicase DDX48, ATP-dependent RNA helicase eIF4A-3, DEAD box protein 48, Eukaryotic initiation factor 4A-like NUK-34, Eukaryotic translation initiation factor 4A isoform 3, Nuclear matrix protein 265, NMP 265, hNMP 265	-0.936516	-2.02851
P78345	RPP38	Ribonuclease P protein subunit p38, RNaseP protein p38	0.0119427	-3.10841
P13639	EEF2	Elongation factor 2, EF-2	-0.753756	-0.760362
O00442	RTCA	RNA 3'-terminal phosphate cyclase, RNA cyclase, RNA-3'-phosphate cyclase, 6.5.1.4, RNA terminal phosphate cyclase domain-containing protein 1, RTC domain-containing protein 1	-0.0260499	-2.20856
O43148	RNMT	mRNA cap guanine-N7 methyltransferase, 2.1.1.56, RG7MT1, mRNA (guanine-N(7))-methyltransferase, mRNA cap methyltransferase, hCMT1, hMet, hcm1p	-0.0948973	-2.89846
Q9C0J8	WDR33	pre-mRNA 3' end processing protein WDR33, WD repeat-containing protein 33, WD repeat-containing protein of 146 kDa	0.484786	-1.9054
Q9NUQ6	SPATS2L	SPATS2-like protein, DNA polymerase-transactivated protein 6, Stress granule and nucleolar protein, SGNP	0.603421	-2.27905
Q13435	SF3B2	Splicing factor 3B subunit 2, Pre-mRNA-splicing factor SF3b 145 kDa subunit, SF3b145, Spliceosome-associated protein 145, SAP 145	-0.274535	-1.95692
Q9P2E9	RRBP1	Ribosome-binding protein 1, 180 kDa ribosome receptor homolog, RRp, ES/130-related protein, Ribosome receptor protein	-0.116801	-2.04764
Q9BQ75	CMSS1	Protein CMSS1, Cms1 ribosomal small subunit homolog	-0.790037	-3.31613
Q86UP2	KTN1	Kinectin, CG-1 antigen, Kinesin receptor	-0.301472	-2.13015
Q9NYY8	FASTKD2	FAST kinase domain-containing protein 2, mitochondrial	0.257657	-2.11546
Q9BZI7	UPF3B	Regulator of nonsense transcripts 3B, Nonsense mRNA reducing factor 3B, Up-frameshift suppressor 3 homolog B, hUpf3B, Up-frameshift suppressor 3 homolog on chromosome X, hUpf3p-X	-0.0275123	-3.27086
Q86UK7	ZNF598	E3 ubiquitin-protein ligase ZNF598, 2.3.2.27, Zinc finger protein 598	0.158987	-2.65382
Q9NXG2	THUMPD1	THUMP domain-containing protein 1	-0.377745	-3.21487
O95900	TRUB2	Pseudouridylate synthase TRUB2, mitochondrial, 5.4.99.-, TruB pseudouridine synthase homolog 2, tRNA pseudouridine 55 synthase TRUB2, Psi55 synthase TRUB2, 5.4.99.25	0.726894	-2.52207
Q9UHI6	DDX20	Probable ATP-dependent RNA helicase DDX20, 3.6.1.15, 3.6.4.13, Component of gems 3, DEAD box protein 20, DEAD box protein DP 103, Gemin-3	-0.472318	-2.55448
Q9BRJ2	MRPL45	39S ribosomal protein L45, mitochondrial, L45mt, MRP-L45, Mitochondrial large ribosomal subunit protein mL45	0.0907017	-1.92822
Q8N726	CDKN2A	Tumor suppressor ARF, Alternative reading frame, ARF, Cyclin-dependent kinase inhibitor 2A, p14ARF	-0.384694	-2.9649
Q9Y6M1	IGF2BP2	Insulin-like growth factor 2 mRNA-binding protein 2, IGF2 mRNA-binding protein 2, IMP-2, Hepatocellular carcinoma autoantigen p62, IGF-II mRNA-binding protein 2, VICKZ family member 2	1.10975	-2.61797
Q9UKV8	AGO2	Protein argonaute-2, Argonaute2, hAgo2, 3.1.26.n2, Argonaute RISC catalytic component 2, Eukaryotic translation initiation factor 2C 2, eIF-2C 2, eIF2C 2, PAZ Piwi domain protein, PPD, Protein slicer	0.276257	-2.36964
O00267	SUPT5H	Transcription elongation factor SPT5, hSPT5, DRB sensitivity-inducing factor 160 kDa subunit, DSIF p160, DRB sensitivity-inducing factor large subunit, DSIF large subunit, Tat-cotransactivator 1 protein, Tat-CT1 protein	-0.0116605	-1.89278
Q9H7E2	TDRD3	Tudor domain-containing protein 3	0.678115	-2.79395
Q8N9T8	KRI1	Protein KRI1 homolog	-0.35238	-2.64781
Q15020	SART3	Squamous cell carcinoma antigen recognized by T-cells 3, SART-3, Tat-interacting protein of 110 kDa, Tip110, p110 nuclear RNA-binding protein	0.314851	-1.66646
Q9HAV4	XPO5	Exportin-5, Exp5, Ran-binding protein 21	-0.29337	-2.14802
Q9NVP1	DDX18	ATP-dependent RNA helicase DDX18, 3.6.4.13, DEAD box protein 18, Myc-regulated DEAD box protein, MrDb	-0.0372563	-1.72112
Q7Z2W9	MRPL21	39S ribosomal protein L21, mitochondrial, L21mt, MRP-L21, Mitochondrial large ribosomal subunit protein bL21m	-0.431859	-2.979
P62244	RPS15A	40S ribosomal protein S15a, Small ribosomal subunit protein uS8	-1.1708	-1.8892
Q7L1Q6	BZW1	eIF5-mimic protein 2, Basic leucine zipper and W2 domain-containing protein 1, Protein Orf	-0.697992	-1.94831
Q9UPY3	DICER1	Endoribonuclease Dicer, 3.1.26.3, Helicase with RNase motif, Helicase MOI	0.570013	-3.14511
Q53EL6	PDCD4	Programmed cell death protein 4, Neoplastic transformation inhibitor protein, Nuclear antigen H731-like, Protein 197/15a	-0.475607	-2.69243
P55769	SNU13	NHP2-like protein 1, High mobility group-like nuclear protein 2 homolog 1, OTK27, SNU13 homolog, hSNU13, U4/U6.U5 small nuclear ribonucleoprotein SNU13, U4/U6.U5 tri-snRNP 15.5 kDa protein	-1.1916	-3.04827
Q93062	RBPMS	RNA-binding protein with multiple splicing, RBP-MS, Heart and RRM expressed sequence, Hermes	1.16241	-3.26677
Q9BZZ5	API5	Apoptosis inhibitor 5, API-5, Antiapoptosis clone 11 protein, AAC-11, Cell migration-inducing gene 8 protein, Fibroblast growth factor 2-interacting factor, FIF, Protein XAGL	-0.058398	-2.20725
P09874	PARP1	Poly [ADP-ribose] polymerase, 2.4.2.30	-0.689837	-1.78142
P62701	RPS4X	40S ribosomal protein S4, X isoform, SCR10, Single copy abundant mRNA protein, Small ribosomal subunit protein eS4	-0.938189	-1.42883
P46779	RPL28	60S ribosomal protein L28, Large ribosomal subunit protein eL28	-1.22749	-2.38015
O43818	RRP9	U3 small nucleolar RNA-interacting protein 2, RRP9 homolog, U3 small nucleolar ribonucleoprotein-associated 55 kDa protein, U3 snoRNP-associated 55 kDa protein, U3-55K	-0.860598	-2.94348
O75616	ERAL1	GTPase Era, mitochondrial, H-ERA, hERA, Conserved ERA-like GTPase, CEGA, ERA-W, ERA-like protein 1	0.307298	-2.04657
Q13601	KRR1	KRR1 small subunit processome component homolog, HIV-1 Rev-binding protein 2, KRR-R motif-containing protein 1, Rev-interacting protein 1, Rip-1	0.0884293	-2.1216
Q9P2E3	ZNFX1	NFX1-type zinc finger-containing protein 1	0.693428	-1.90055
P30101	PDIA3	Protein disulfide-isomerase A3, 5.3.4.1, 58 kDa glucose-regulated protein, 58 kDa microsomal protein, p58, Disulfide isomerase ER-60, Endoplasmic reticulum resident protein 57, ER protein 57, ERp57, Endoplasmic reticulum resident protein 60, ER protein 60, ERp60	-1.47723	-2.13237
Q9NYH9	UTP6	U3 small nucleolar RNA-associated protein 6 homolog, Hepatocellular carcinoma-associated antigen 66, Multiple hat domains protein	-0.73875	-3.00958
Q9NX05	FAM120C	Constitutive coactivator of PPAR-gamma-like protein 2, Protein FAM120C, Tumor antigen BJ-HCC-21	0.197322	-3.07665
P82914	MRPS15	28S ribosomal protein S15, mitochondrial, MRP-S15, S15mt, Mitochondrial small ribosomal subunit protein uS15m	0.163012	-2.75298
Q9Y4W2	LAS1L	Ribosomal biogenesis protein LAS1L, Protein LAS1 homolog	-0.616085	-2.99103
Q9BYD3	MRPL4	39S ribosomal protein L4, mitochondrial, L4mt, MRP-L4, Mitochondrial large ribosomal subunit protein uL4m	0.27802	-2.23328
Q99543	DNAJC2	DnaJ homolog subfamily C member 2, M-phase phosphoprotein 11, Zuotin-related factor 1	-0.389763	-2.67128
Q9Y3T9	NOC2L	Nucleolar complex protein 2 homolog, Protein NOC2 homolog, NOC2-like protein, Novel INHAT repressor	-0.599578	-2.45765
Q96I51	RCC1L	RCC1-like G exchanging factor-like protein, RCC1-like, Williams-Beuren syndrome chromosomal region 16 protein	0.352573	-2.2577
P30876	POLR2B	DNA-directed RNA polymerase II subunit RPB2, 2.7.7.6, DNA-directed RNA polymerase II 140 kDa polypeptide, DNA-directed RNA polymerase II subunit B, RNA polymerase II subunit 2, RNA polymerase II subunit B2	-0.00753899	-1.8378
Q7RTV0	PHF5A	PHD finger-like domain-containing protein 5A, PHD finger-like domain protein 5A, Splicing factor 3B-associated 14 kDa protein, SF3b14b	-0.425515	-2.37543
O76094	SRP72	Signal recognition particle subunit SRP72, SRP72, Signal recognition particle 72 kDa protein	0.238779	-2.00482
Q9NYL2	MAP3K20	Mitogen-activated protein kinase kinase kinase 20, 2.7.11.25, Human cervical cancer suppressor gene 4 protein, HCCS-4, Leucine zipper- and sterile alpha motif-containing kinase, MLK-like mitogen-activated protein triple kinase, Mitogen-activated protein kinase kinase kinase MLT, Mixed lineage kinase 7, Mixed lineage kinase-related kinase, MLK-related kinase, MRK, Sterile alpha motif- and leucine …	0.529237	-2.50395
P56182	RRP1	Ribosomal RNA processing protein 1 homolog A, Novel nuclear protein 1, NNP-1, Nucleolar protein Nop52, RRP1-like protein	-0.203464	-2.42318
Q14157	UBAP2L	Ubiquitin-associated protein 2-like, Protein NICE-4, RNA polymerase II degradation factor UBAP2L	0.377711	-1.23475
Q15428	SF3A2	Splicing factor 3A subunit 2, SF3a66, Spliceosome-associated protein 62, SAP 62	-0.546095	-2.52816
P62857	RPS28	40S ribosomal protein S28, Small ribosomal subunit protein eS28	-1.26633	-2.6184
Q9BTC0	DIDO1	Death-inducer obliterator 1, DIO-1, hDido1, Death-associated transcription factor 1, DATF-1	-0.042872	-2.90061
Q9Y2R9	MRPS7	28S ribosomal protein S7, mitochondrial, MRP-S7, S7mt, Mitochondrial small ribosomal subunit protein uS7m, bMRP-27a, bMRP27a	0.0537023	-2.34665
P62314	SNRPD1	Small nuclear ribonucleoprotein Sm D1, Sm-D1, Sm-D autoantigen, snRNP core protein D1	-0.531964	-2.36887
Q8TEQ6	GEMIN5	Gem-associated protein 5, Gemin5	-0.294271	-1.89604
Q8NDF8	TENT4B	Terminal nucleotidyltransferase 4B, Non-canonical poly(A) RNA polymerase PAPD5, 2.7.7.19, PAP-associated domain-containing protein 5, Terminal guanylyltransferase, 2.7.7.-, Terminal uridylyltransferase 3, TUTase 3, Topoisomerase-related function protein 4-2, TRF4-2	0.442185	-3.08374
Q9BZJ0	CRNKL1	Crooked neck-like protein 1, Crooked neck homolog, hCrn	-0.483874	-3.52031
Q9BYJ9	YTHDF1	YTH domain-containing family protein 1, DF1, Dermatomyositis associated with cancer putative autoantigen 1, DACA-1	1.01649	-2.60325
P07237	P4HB	Protein disulfide-isomerase, PDI, 5.3.4.1, Cellular thyroid hormone-binding protein, Prolyl 4-hydroxylase subunit beta, p55	-1.39258	-2.37014
Q969Z0	TBRG4	FAST kinase domain-containing protein 4, Cell cycle progression restoration protein 2, Cell cycle progression protein 2, Protein TBRG4, Transforming growth factor beta regulator 4	0.0342034	-2.01919
Q8NEY8	PPHLN1	Periphilin-1, CDC7 expression repressor, CR, Gastric cancer antigen Ga50	-0.0225636	-2.49358
Q96QD9	FYTTD1	UAP56-interacting factor, Forty-two-three domain-containing protein 1, Protein 40-2-3	0.467046	-3.37289
O60524	NEMF	Ribosome quality control complex subunit NEMF, Antigen NY-CO-1, Nuclear export mediator factor, Serologically defined colon cancer antigen 1	0.214855	-2.31243
Q96G21	IMP4	U3 small nucleolar ribonucleoprotein protein IMP4, U3 snoRNP protein IMP4, Brix domain-containing protein 4	-0.136005	-2.61653
Q9Y3F4	STRAP	Serine-threonine kinase receptor-associated protein, MAP activator with WD repeats, UNR-interacting protein, WD-40 repeat protein PT-WD	-0.96537	-2.39823
Q14978	NOLC1	Nucleolar and coiled-body phosphoprotein 1, 140 kDa nucleolar phosphoprotein, Nopp140, Hepatitis C virus NS5A-transactivated protein 13, HCV NS5A-transactivated protein 13, Nucleolar 130 kDa protein, Nucleolar phosphoprotein p130	-0.736392	-1.66131
Q9BRT6	LLPH	Protein LLP homolog, Protein LAPS18-like	-0.195518	-2.65339
Q69YN4	VIRMA	Protein virilizer homolog	-0.0618811	-3.15435
P08621	SNRNP70	U1 small nuclear ribonucleoprotein 70 kDa, U1 snRNP 70 kDa, U1-70K, snRNP70	0.264741	-1.03581
P20810	CAST	Calpastatin, Calpain inhibitor, Sperm BS-17 component	-0.890897	-2.87494
P26639	TARS1	Threonine--tRNA ligase 1, cytoplasmic, 6.1.1.3, Threonyl-tRNA synthetase, ThrRS, Threonyl-tRNA synthetase 1	-1.40932	-2.24175
P08240	SRPRA	Signal recognition particle receptor subunit alpha, SR-alpha, Docking protein alpha, DP-alpha	-0.572675	-2.4154
Q8N3C0	ASCC3	Activating signal cointegrator 1 complex subunit 3, 3.6.4.12, ASC-1 complex subunit p200, ASC1p200, Helicase, ATP binding 1, Trip4 complex subunit p200	0.296112	-2.18842
Q8NHQ9	DDX55	ATP-dependent RNA helicase DDX55, 3.6.4.13, DEAD box protein 55	0.210171	-2.57191
P04843	RPN1	Dolichyl-diphosphooligosaccharide--protein glycosyltransferase subunit 1, Dolichyl-diphosphooligosaccharide--protein glycosyltransferase 67 kDa subunit, Ribophorin I, RPN-I, Ribophorin-1	-0.951518	-2.19126
Q8N684	CPSF7	Cleavage and polyadenylation specificity factor subunit 7, Cleavage and polyadenylation specificity factor 59 kDa subunit, CPSF 59 kDa subunit, Cleavage factor Im complex 59 kDa subunit, CFIm59, Pre-mRNA cleavage factor Im 59 kDa subunit	-0.533656	-2.54104
Q92973	TNPO1	Transportin-1, Importin beta-2, Karyopherin beta-2, M9 region interaction protein, MIP	-0.636794	-2.02875
Q14683	SMC1A	Structural maintenance of chromosomes protein 1A, SMC protein 1A, SMC-1-alpha, SMC-1A, Sb1.8	0.015327	-1.31434
O75369	FLNB	Filamin-B, FLN-B, ABP-278, ABP-280 homolog, Actin-binding-like protein, Beta-filamin, Filamin homolog 1, Fh1, Filamin-3, Thyroid autoantigen, Truncated actin-binding protein, Truncated ABP	0.0300541	0.152587
P05388	RPLP0	60S acidic ribosomal protein P0, 60S ribosomal protein L10E, Large ribosomal subunit protein uL10	-1.44775	-2.34102
Q9HAU5	UPF2	Regulator of nonsense transcripts 2, Up-frameshift suppressor 2 homolog, hUpf2	-0.290991	-2.75553
Q96IZ5	RBM41	RNA-binding protein 41, RNA-binding motif protein 41	0.980042	-2.64741
P20042	EIF2S2	Eukaryotic translation initiation factor 2 subunit 2, Eukaryotic translation initiation factor 2 subunit beta, eIF-2-beta	-1.14889	-2.50663
Q96DH6	MSI2	RNA-binding protein Musashi homolog 2, Musashi-2	0.73574	-2.26189
Q9NVV4	MTPAP	Poly(A) RNA polymerase, mitochondrial, PAP, 2.7.7.19, PAP-associated domain-containing protein 1, Polynucleotide adenylyltransferase, Terminal uridylyltransferase 1, TUTase 1, mtPAP	-0.167165	-2.58748
Q9Y6K5	OAS3	2'-5'-oligoadenylate synthase 3, (2-5')oligo(A) synthase 3, 2-5A synthase 3, 2.7.7.84, p100 OAS, p100OAS	0.0520113	-2.91958
Q9NP92	MRPS30	39S ribosomal protein S30, mitochondrial, MRP-S30, S30mt, Mitochondrial large ribosomal subunit protein mL65, Mitochondrial large ribosomal subunit protein mS30, Programmed cell death protein 9	-0.0982359	-2.79359
P55081	MFAP1	Microfibrillar-associated protein 1, Spliceosome B complex protein MFAP1	-0.0958158	-2.17143
Q9Y2R4	DDX52	Probable ATP-dependent RNA helicase DDX52, 3.6.4.13, ATP-dependent RNA helicase ROK1-like, DEAD box protein 52	0.00427443	-2.21333
Q5TC82	RC3H1	Roquin-1, Roquin, 2.3.2.27, RING finger and C3H zinc finger protein 1, RING finger and CCCH-type zinc finger domain-containing protein 1, RING finger protein 198	0.366916	-2.52151
Q6IN84	MRM1	rRNA methyltransferase 1, mitochondrial, 2.1.1.-, 16S rRNA (guanosine(1145)-2'-O)-methyltransferase, 16S rRNA [Gm1145] 2'-O-methyltransferase	0.117545	-3.08516
Q00059	TFAM	Transcription factor A, mitochondrial, mtTFA, Mitochondrial transcription factor 1, MtTF1, Transcription factor 6, TCF-6, Transcription factor 6-like 2	-0.759733	-2.48596
Q15149	PLEC	Plectin, PCN, PLTN, Hemidesmosomal protein 1, HD1, Plectin-1	-0.456401	-1.01685
Q9H501	ESF1	ESF1 homolog, ABT1-associated protein	0.294328	-2.21014
P26358	DNMT1	DNA (cytosine-5)-methyltransferase 1, Dnmt1, 2.1.1.37, CXXC-type zinc finger protein 9, DNA methyltransferase HsaI, DNA MTase HsaI, M.HsaI, MCMT	-1.20088	-2.94308
O94913	PCF11	Pre-mRNA cleavage complex 2 protein Pcf11, Pre-mRNA cleavage complex II protein Pcf11	0.378737	-3.32966
Q9NR56	MBNL1	Muscleblind-like protein 1, Triplet-expansion RNA-binding protein	1.02778	-1.0392
Q9ULR0	ISY1	Pre-mRNA-splicing factor ISY1 homolog	-0.457251	-3.50856
Q6PK04	CCDC137	Coiled-coil domain-containing protein 137	0.292882	-1.7835
O60231	DHX16	Pre-mRNA-splicing factor ATP-dependent RNA helicase DHX16, 3.6.4.13, ATP-dependent RNA helicase #3, DEAH-box protein 16	-0.700106	-3.08461
O60841	EIF5B	Eukaryotic translation initiation factor 5B, eIF-5B, 3.6.5.3, Translation initiation factor IF-2	-0.256943	-1.55155
O75643	SNRNP200	U5 small nuclear ribonucleoprotein 200 kDa helicase, 3.6.4.13, Activating signal cointegrator 1 complex subunit 3-like 1, BRR2 homolog, U5 snRNP-specific 200 kDa protein, U5-200KD	-0.892899	-1.99405
P62495	ETF1	Eukaryotic peptide chain release factor subunit 1, Eukaryotic release factor 1, eRF1, Protein Cl1, TB3-1	-0.732296	-2.29465
Q14320	FAM50A	Protein FAM50A, Protein HXC-26, Protein XAP-5	-1.15603	-3.71716
P10155	RO60	RNA-binding protein RO60, 60 kDa SS-A/Ro ribonucleoprotein, 60 kDa Ro protein, 60 kDa ribonucleoprotein Ro, RoRNP, Ro 60 kDa autoantigen, Ro60 autoantigen, Sjoegren syndrome antigen A2, Sjoegren syndrome type A antigen, SS-A, TROVE domain family member 2	-0.664094	-2.88999
Q53EP0	FNDC3B	Fibronectin type III domain-containing protein 3B, Factor for adipocyte differentiation 104, HCV NS5A-binding protein 37	0.26106	-3.32658
Q9NS39	ADARB2	Double-stranded RNA-specific editase B2, 3.5.-.-, RNA-dependent adenosine deaminase 3, RNA-editing deaminase 2, RNA-editing enzyme 2, dsRNA adenosine deaminase B2	0.798711	-3.5759
Q8TCS8	PNPT1	Polyribonucleotide nucleotidyltransferase 1, mitochondrial, 2.7.7.8, 3'-5' RNA exonuclease OLD35, PNPase old-35, Polynucleotide phosphorylase 1, PNPase 1, Polynucleotide phosphorylase-like protein	-1.1783	-2.89598
Q9BVP2	GNL3	Guanine nucleotide-binding protein-like 3, E2-induced gene 3 protein, Novel nucleolar protein 47, NNP47, Nucleolar GTP-binding protein 3, Nucleostemin	0.139185	-1.34616
Q01082	SPTBN1	Spectrin beta chain, non-erythrocytic 1, Beta-II spectrin, Fodrin beta chain, Spectrin, non-erythroid beta chain 1	-1.06079	-2.32229
Q8IVS2	MCAT	Malonyl-CoA-acyl carrier protein transacylase, mitochondrial, MCT, 2.3.1.39, Mitochondrial malonyl CoA:ACP acyltransferase, Mitochondrial malonyltransferase, [Acyl-carrier-protein] malonyltransferase	0.267739	-2.65438
P15311	EZR	Ezrin, Cytovillin, Villin-2, p81	-0.959898	-1.95654
P62937	PPIA	Peptidyl-prolyl cis-trans isomerase A, PPIase A, 5.2.1.8, Cyclophilin A, Cyclosporin A-binding protein, Rotamase A	-1.76342	-1.63986
P21333	FLNA	Filamin-A, FLN-A, Actin-binding protein 280, ABP-280, Alpha-filamin, Endothelial actin-binding protein, Filamin-1, Non-muscle filamin	-1.13951	-1.6262
Q14527	HLTF	Helicase-like transcription factor, 2.3.2.27, 3.6.4.-, DNA-binding protein/plasminogen activator inhibitor 1 regulator, HIP116, RING finger protein 80, RING-type E3 ubiquitin transferase HLTF, SWI/SNF-related matrix-associated actin-dependent regulator of chromatin subfamily A member 3, Sucrose nonfermenting protein 2-like 3	-0.462707	-2.99681
P82933	MRPS9	28S ribosomal protein S9, mitochondrial, MRP-S9, S9mt, Mitochondrial small ribosomal subunit protein uS9m	0.0400312	-2.10219
A5YKK6	CNOT1	CCR4-NOT transcription complex subunit 1, CCR4-associated factor 1, Negative regulator of transcription subunit 1 homolog, NOT1H, hNOT1	-0.450139	-2.6714
Q5SY16	NOL9	Polynucleotide 5'-hydroxyl-kinase NOL9, 2.7.1.-, Nucleolar protein 9	-0.130552	-2.71939
Q8NEJ9	NGDN	Neuroguidin, Centromere accumulated nuclear protein 1, CANu1, EIF4E-binding protein	0.14193	-2.71886
P49792	RANBP2	E3 SUMO-protein ligase RanBP2, 2.3.2.-, 358 kDa nucleoporin, Nuclear pore complex protein Nup358, Nucleoporin Nup358, Ran-binding protein 2, RanBP2, p270	-0.905955	-2.30098
Q92888	ARHGEF1	Rho guanine nucleotide exchange factor 1, 115 kDa guanine nucleotide exchange factor, p115-RhoGEF, p115RhoGEF, Sub1.5	-0.411361	-3.39428
Q9H9J2	MRPL44	39S ribosomal protein L44, mitochondrial, L44mt, MRP-L44, 3.1.26.-, Mitochondrial large ribosomal subunit protein mL44	-0.437341	-2.97209
Q9Y2Z4	YARS2	Tyrosine--tRNA ligase, mitochondrial, 6.1.1.1, Tyrosyl-tRNA synthetase, TyrRS	-0.260097	-2.18402
Q9Y324	FCF1	rRNA-processing protein FCF1 homolog	0.434794	-2.40344
P38432	COIL	Coilin, p80-coilin	-0.30766	-3.0745
Q9UK61	TASOR	Protein TASOR, CTCL tumor antigen se89-1, Retinoblastoma-associated protein RAP140, Transgene activation suppressor protein	0.508818	-3.06429
Q6P158	DHX57	Putative ATP-dependent RNA helicase DHX57, 3.6.4.13, DEAH box protein 57	0.41788	-1.78831
P38646	HSPA9	Stress-70 protein, mitochondrial, 75 kDa glucose-regulated protein, GRP-75, Heat shock 70 kDa protein 9, Mortalin, MOT, Peptide-binding protein 74, PBP74	-1.53818	-1.94835
O75400	PRPF40A	Pre-mRNA-processing factor 40 homolog A, Fas ligand-associated factor 1, Formin-binding protein 11, Formin-binding protein 3, Huntingtin yeast partner A, Huntingtin-interacting protein 10, HIP-10, Huntingtin-interacting protein A, Renal carcinoma antigen NY-REN-6	-0.449125	-2.46153
P35241	RDX	Radixin	-1.24359	-3.01411
P60228	EIF3E	Eukaryotic translation initiation factor 3 subunit E, eIF3e, Eukaryotic translation initiation factor 3 subunit 6, Viral integration site protein INT-6 homolog, eIF-3 p48	-1.17571	-2.49168
P23284	PPIB	Peptidyl-prolyl cis-trans isomerase B, PPIase B, 5.2.1.8, CYP-S1, Cyclophilin B, Rotamase B, S-cyclophilin, SCYLP	-2.07927	-2.58957
P49591	SARS1	Serine--tRNA ligase, cytoplasmic, 6.1.1.11, Seryl-tRNA synthetase, SerRS, Seryl-tRNA(Ser/Sec) synthetase	-0.670878	-2.49545
Q9Y262	EIF3L	Eukaryotic translation initiation factor 3 subunit L, eIF3l, Eukaryotic translation initiation factor 3 subunit 6-interacting protein, Eukaryotic translation initiation factor 3 subunit E-interacting protein	-1.28903	-2.52874
P54136	RARS1	Arginine--tRNA ligase, cytoplasmic, 6.1.1.19, Arginyl-tRNA synthetase, ArgRS	-0.800428	-2.10775
O43143	DHX15	ATP-dependent RNA helicase DHX15, 3.6.4.13, ATP-dependent RNA helicase #46, DEAH box protein 15, Splicing factor Prp43, hPrp43	-0.399113	-1.54796
P02786	TFRC	Transferrin receptor protein 1, TR, TfR, TfR1, Trfr, T9, p90, CD71	-1.62482	-2.32716
Q13206	DDX10	Probable ATP-dependent RNA helicase DDX10, 3.6.4.13, DEAD box protein 10	-0.349122	-1.43011
O15213	WDR46	WD repeat-containing protein 46, WD repeat-containing protein BING4	0.323312	-1.64247
P61011	SRP54	Signal recognition particle subunit SRP54, 3.6.5.-, Signal recognition particle 54 kDa protein	-0.35091	-2.78865
P24928	POLR2A	DNA-directed RNA polymerase II subunit RPB1, RNA polymerase II subunit B1, 2.7.7.6, DNA-directed RNA polymerase II subunit A, DNA-directed RNA polymerase III largest subunit, RNA-directed RNA polymerase II subunit RPB1, 2.7.7.48	0.324916	-1.61919
P49750	YLPM1	YLP motif-containing protein 1, Nuclear protein ZAP3, ZAP113	0.586029	-2.33331
P78527	PRKDC	DNA-dependent protein kinase catalytic subunit, DNA-PK catalytic subunit, DNA-PKcs, 2.7.11.1, DNPK1, p460	-0.648696	-0.826513
A4D1E9	GTPBP10	GTP-binding protein 10, Protein obg homolog 2, ObgH2	-0.475148	-3.33063
Q6P6C2	ALKBH5	RNA demethylase ALKBH5, 1.14.11.53, Alkylated DNA repair protein alkB homolog 5, Alpha-ketoglutarate-dependent dioxygenase alkB homolog 5	0.133247	-3.98464
Q9UII4	HERC5	E3 ISG15--protein ligase HERC5, 2.3.2.-, Cyclin-E-binding protein 1, HECT domain and RCC1-like domain-containing protein 5	0.594096	-1.67668
P63241	EIF5A	Eukaryotic translation initiation factor 5A-1, eIF-5A-1, eIF-5A1, Eukaryotic initiation factor 5A isoform 1, eIF-5A, Rev-binding factor, eIF-4D	-1.2469	-1.74115
O75127	PTCD1	Pentatricopeptide repeat-containing protein 1, mitochondrial	0.629345	-2.62321
P46060	RANGAP1	Ran GTPase-activating protein 1, RanGAP1	-1.3788	-3.05596
P55884	EIF3B	Eukaryotic translation initiation factor 3 subunit B, eIF3b, Eukaryotic translation initiation factor 3 subunit 9, Prt1 homolog, hPrt1, eIF-3-eta, eIF3 p110, eIF3 p116	-1.30544	-2.58367
Q15046	KARS1	Lysine--tRNA ligase, 2.7.7.-, 6.1.1.6, Lysyl-tRNA synthetase, LysRS	-0.813761	-2.37739
O00178	GTPBP1	GTP-binding protein 1, G-protein 1, GP-1, GP1	-0.258017	-3.31425
P62249	RPS16	40S ribosomal protein S16, Small ribosomal subunit protein uS9	-1.04274	-1.62709
Q96EV2	RBM33	RNA-binding protein 33, Proline-rich protein 8, RNA-binding motif protein 33	-0.321777	-3.50927
P54577	YARS1	Tyrosine--tRNA ligase, cytoplasmic, 6.1.1.1, Tyrosyl-tRNA synthetase, TyrRS	-1.32194	-2.63983
P18583	SON	Protein SON, Bax antagonist selected in saccharomyces 1, BASS1, Negative regulatory element-binding protein, NRE-binding protein, Protein DBP-5, SON3	0.183454	-1.66417
O95793	STAU1	Double-stranded RNA-binding protein Staufen homolog 1	0.210901	-3.22884
Q13427	PPIG	Peptidyl-prolyl cis-trans isomerase G, PPIase G, Peptidyl-prolyl isomerase G, 5.2.1.8, CASP10, Clk-associating RS-cyclophilin, CARS-Cyp, CARS-cyclophilin, SR-cyclophilin, SR-cyp, SRcyp, Cyclophilin G, Rotamase G	0.0585618	-2.68423
Q86U38	NOP9	Nucleolar protein 9	0.488852	-2.01302
Q8IWS0	PHF6	PHD finger protein 6, PHD-like zinc finger protein	-1.05266	-3.1491
Q7L2J0	MEPCE	7SK snRNA methylphosphate capping enzyme, MePCE, 2.1.1.-, Bicoid-interacting protein 3 homolog, Bin3 homolog	0.363424	-1.76925
O75319	DUSP11	RNA/RNP complex-1-interacting phosphatase, 3.1.3.-, Dual specificity protein phosphatase 11, Phosphatase that interacts with RNA/RNP complex 1	0.440369	-2.42692
Q14966	ZNF638	Zinc finger protein 638, Cutaneous T-cell lymphoma-associated antigen se33-1, CTCL-associated antigen se33-1, Nuclear protein 220, Zinc finger matrin-like protein	0.181079	-2.08468
Q16658	FSCN1	Fascin, 55 kDa actin-bundling protein, Singed-like protein, p55	-1.76604	-2.51329
Q15646	OASL	2'-5'-oligoadenylate synthase-like protein, 2'-5'-OAS-related protein, 2'-5'-OAS-RP, 59 kDa 2'-5'-oligoadenylate synthase-like protein, Thyroid receptor-interacting protein 14, TR-interacting protein 14, TRIP-14, p59 OASL, p59OASL	0.361729	-3.10161
P07814	EPRS1	Bifunctional glutamate/proline--tRNA ligase, Bifunctional aminoacyl-tRNA synthetase, Cell proliferation-inducing gene 32 protein, Glutamatyl-prolyl-tRNA synthetase, Glutamate--tRNA ligase, 6.1.1.17, Glutamyl-tRNA synthetase, GluRS, Proline--tRNA ligase, 6.1.1.15, Prolyl-tRNA synthetase	-0.969262	-1.84242
Q9UPT8	ZC3H4	Zinc finger CCCH domain-containing protein 4	0.296913	-2.64823
O60287	URB1	Nucleolar pre-ribosomal-associated protein 1, Nucleolar protein 254 kDa, URB1 ribosome biogenesis 1 homolog	0.111874	-2.06576
Q14562	DHX8	ATP-dependent RNA helicase DHX8, 3.6.4.13, DEAH box protein 8, RNA helicase HRH1	0.261625	-2.1553
P51398	DAP3	28S ribosomal protein S29, mitochondrial, MRP-S29, S29mt, Death-associated protein 3, DAP-3, Ionizing radiation resistance conferring protein, Mitochondrial small ribosomal subunit protein mS29	-0.762181	-3.13119
Q9BYD2	MRPL9	39S ribosomal protein L9, mitochondrial, L9mt, MRP-L9, Mitochondrial large ribosomal subunit protein bL9m	-0.243391	-2.88405
Q16513	PKN2	Serine/threonine-protein kinase N2, 2.7.11.13, PKN gamma, Protein kinase C-like 2, Protein-kinase C-related kinase 2	-0.939233	-2.77478
Q9H5Q4	TFB2M	Dimethyladenosine transferase 2, mitochondrial, 2.1.1.-, Hepatitis C virus NS5A-transactivated protein 5, HCV NS5A-transactivated protein 5, Mitochondrial 12S rRNA dimethylase 2, Mitochondrial transcription factor B2, h-mtTFB, h-mtTFB2, hTFB2M, mtTFB2, S-adenosylmethionine-6-N', N'-adenosyl(rRNA) dimethyltransferase 2	-0.137767	-2.75333
Q9UPN3	MACF1	Microtubule-actin cross-linking factor 1, isoforms 1/2/3/4/5, 620 kDa actin-binding protein, ABP620, Actin cross-linking family protein 7, Macrophin-1, Trabeculin-alpha	-0.43783	-2.73032
Q09161	NCBP1	Nuclear cap-binding protein subunit 1, 80 kDa nuclear cap-binding protein, CBP80, NCBP 80 kDa subunit	-1.20579	-3.09383
Q92616	GCN1	eIF-2-alpha kinase activator GCN1, GCN1 eIF-2-alpha kinase activator homolog, GCN1-like protein 1, General control of amino-acid synthesis 1-like protein 1, Translational activator GCN1, HsGCN1	-0.898986	-2.00638
P49756	RBM25	RNA-binding protein 25, Arg/Glu/Asp-rich protein of 120 kDa, RED120, Protein S164, RNA-binding motif protein 25, RNA-binding region-containing protein 7	-0.580535	-2.72653
Q06830	PRDX1	Peroxiredoxin-1, 1.11.1.24, Natural killer cell-enhancing factor A, NKEF-A, Proliferation-associated gene protein, PAG, Thioredoxin peroxidase 2, Thioredoxin-dependent peroxide reductase 2, Thioredoxin-dependent peroxiredoxin 1	-1.66438	-1.83918
Q7KZI7	MARK2	Serine/threonine-protein kinase MARK2, 2.7.11.1, 2.7.11.26, ELKL motif kinase 1, EMK-1, MAP/microtubule affinity-regulating kinase 2, PAR1 homolog, PAR1 homolog b, Par-1b, Par1b	-1.40309	-3.8542
P50995	ANXA11	Annexin A11, 56 kDa autoantigen, Annexin XI, Annexin-11, Calcyclin-associated annexin 50, CAP-50	-0.692091	-2.50628
P82673	MRPS35	28S ribosomal protein S35, mitochondrial, MRP-S35, S35mt, 28S ribosomal protein S28, mitochondrial, MRP-S28, S28mt, Mitochondrial small ribosomal subunit protein mS35	-0.671686	-3.36228
Q9Y3I0	RTCB	RNA-splicing ligase RtcB homolog, 6.5.1.8, 3'-phosphate/5'-hydroxy nucleic acid ligase	-0.648804	-2.13865
Q96A33	CCDC47	PAT complex subunit CCDC47, Calumin, Coiled-coil domain-containing protein 47	-0.89109	-2.63158
Q96CB9	NSUN4	5-methylcytosine rRNA methyltransferase NSUN4, 2.1.1.-, 5-methylcytosine tRNA methyltransferase NSUN4, NOL1/NOP2/Sun domain family member 4	-0.200983	-3.49827
Q9Y3B7	MRPL11	39S ribosomal protein L11, mitochondrial, L11mt, MRP-L11, Mitochondrial large ribosomal subunit protein uL11m	-0.797783	-2.95561
O95232	LUC7L3	Luc7-like protein 3, Cisplatin resistance-associated-overexpressed protein, Luc7A, Okadaic acid-inducible phosphoprotein OA48-18, cAMP regulatory element-associated protein 1, CRE-associated protein 1, CREAP-1	-0.653181	-2.80819
P52292	KPNA2	Importin subunit alpha-1, Karyopherin subunit alpha-2, RAG cohort protein 1, SRP1-alpha	-1.05659	-2.1167
Q15056	EIF4H	Eukaryotic translation initiation factor 4H, eIF-4H, Williams-Beuren syndrome chromosomal region 1 protein	0.110426	-1.23434
Q15477	SKIC2	SKI2 subunit of superkiller complex protein, Helicase SKI2W, Ski2, 3.6.4.13, Helicase-like protein, HLP	-0.428729	-2.93164
A0A384MDY0	CTNNA1	Catenin (Cadherin-associated protein), alpha 1, 102kDa, isoform CRA_b, Epididymis secretory sperm binding protein	-0.589342	-2.07921
P52948	NUP98	Nuclear pore complex protein Nup98-Nup96, 3.4.21.-	-1.44774	-3.32122
Q9H0D6	XRN2	5'-3' exoribonuclease 2, 3.1.13.-, DHM1-like protein, DHP protein	0.116886	-1.62457
Q86VM9	ZC3H18	Zinc finger CCCH domain-containing protein 18, Nuclear protein NHN1	-0.186255	-2.51225
Q9Y606	PUS1	Pseudouridylate synthase 1 homolog, 5.4.99.-, tRNA pseudouridine synthase 1, 5.4.99.12, tRNA pseudouridine(38-40) synthase, tRNA pseudouridylate synthase I, tRNA-uridine isomerase I	-0.844232	-3.04843
Q9BQ52	ELAC2	Zinc phosphodiesterase ELAC protein 2, 3.1.26.11, ElaC homolog protein 2, Heredity prostate cancer protein 2, Ribonuclease Z 2, RNase Z 2, tRNA 3 endonuclease 2, tRNase Z 2	-1.04444	-2.64971
P48200	IREB2	Iron-responsive element-binding protein 2, IRE-BP 2, Iron regulatory protein 2, IRP2	0.10053	-3.60651
O14647	CHD2	Chromodomain-helicase-DNA-binding protein 2, CHD-2, 3.6.4.12, ATP-dependent helicase CHD2	0.00933296	-4.04226
P11388	TOP2A	DNA topoisomerase 2-alpha, 5.6.2.2, DNA topoisomerase II, alpha isozyme	-0.786152	-2.068
Q8IX12	CCAR1	Cell division cycle and apoptosis regulator protein 1, Cell cycle and apoptosis regulatory protein 1, CARP-1, Death inducer with SAP domain	-0.614735	-2.54188
Q12931	TRAP1	Heat shock protein 75 kDa, mitochondrial, HSP 75, TNFR-associated protein 1, Tumor necrosis factor type 1 receptor-associated protein, TRAP-1	-1.86279	-2.92966
Q9H583	HEATR1	HEAT repeat-containing protein 1, Protein BAP28, U3 small nucleolar RNA-associated protein 10 homolog	-0.935642	-2.64584
Q8IYB3	SRRM1	Serine/arginine repetitive matrix protein 1, SR-related nuclear matrix protein of 160 kDa, SRm160, Ser/Arg-related nuclear matrix protein	-0.518588	-2.99602
Q6UN15	FIP1L1	Pre-mRNA 3'-end-processing factor FIP1, hFip1, FIP1-like 1 protein, Factor interacting with PAP, Rearranged in hypereosinophilia	0.156382	-2.50012
Q02790	FKBP4	Peptidyl-prolyl cis-trans isomerase FKBP4, PPIase FKBP4, 5.2.1.8, 51 kDa FK506-binding protein, FKBP51, 52 kDa FK506-binding protein, 52 kDa FKBP, FKBP-52, 59 kDa immunophilin, p59, FK506-binding protein 4, FKBP-4, FKBP59, HSP-binding immunophilin, HBI, Immunophilin FKBP52, Rotamase	-0.97936	-1.75279
Q9UKV3	ACIN1	Apoptotic chromatin condensation inducer in the nucleus, Acinus	-1.02097	-2.91946
Q8IYB8	SUPV3L1	ATP-dependent RNA helicase SUPV3L1, mitochondrial, 3.6.4.13, Suppressor of var1 3-like protein 1, SUV3-like protein 1	-0.853648	-3.55163
Q8NDD1	C1orf131	Uncharacterized protein C1orf131	-0.841337	-3.70593
P25705	ATP5F1A	ATP synthase subunit alpha, mitochondrial, ATP synthase F1 subunit alpha	-2.12421	-2.73009
P21399	ACO1	Cytoplasmic aconitate hydratase, Aconitase, 4.2.1.3, Citrate hydro-lyase, Ferritin repressor protein, Iron regulatory protein 1, IRP1, Iron-responsive element-binding protein 1, IRE-BP 1	-1.02662	-2.93305
O95163	ELP1	Elongator complex protein 1, ELP1, IkappaB kinase complex-associated protein, IKK complex-associated protein, p150	-1.27649	-3.20052
Q9UJA5	TRMT6	tRNA (adenine(58)-N(1))-methyltransferase non-catalytic subunit TRM6, mRNA methyladenosine-N(1)-methyltransferase non-catalytic subunit TRM6, tRNA(m1A58)-methyltransferase subunit TRM6, tRNA(m1A58)MTase subunit TRM6	-0.199141	-2.76898
Q14240	EIF4A2	Eukaryotic initiation factor 4A-II, eIF-4A-II, eIF4A-II, 3.6.4.13, ATP-dependent RNA helicase eIF4A-2	-0.927773	-3.22601
Q5C9Z4	NOM1	Nucleolar MIF4G domain-containing protein 1, SGD1 homolog	0.241298	-2.66042
O94906	PRPF6	Pre-mRNA-processing factor 6, Androgen receptor N-terminal domain-transactivating protein 1, ANT-1, PRP6 homolog, U5 snRNP-associated 102 kDa protein, U5-102 kDa protein	-1.06037	-2.69229
P11142	HSPA8	Heat shock cognate 71 kDa protein, 3.6.4.10, Heat shock 70 kDa protein 8, Lipopolysaccharide-associated protein 1, LAP-1, LPS-associated protein 1	-1.80154	-1.5343
P55039	DRG2	Developmentally-regulated GTP-binding protein 2, DRG-2, Translation factor GTPase DRG2, TRAFAC GTPase DRG2, 3.6.5.-	-1.42419	-3.38523
Q5VTL8	PRPF38B	Pre-mRNA-splicing factor 38B, Sarcoma antigen NY-SAR-27	-0.643913	-2.93751
P43897	TSFM	Elongation factor Ts, mitochondrial, EF-Ts, EF-TsMt	-1.26289	-3.14368
P26447	S100A4	Protein S100-A4, Calvasculin, Metastasin, Placental calcium-binding protein, Protein Mts1, S100 calcium-binding protein A4	-2.02205	-3.33157
Q8NAV1	PRPF38A	Pre-mRNA-splicing factor 38A	-0.02132	-2.67591
Q9NSE4	IARS2	Isoleucine--tRNA ligase, mitochondrial, 6.1.1.5, Isoleucyl-tRNA synthetase, IleRS	-1.18666	-3.09883
P21291	CSRP1	Cysteine and glycine-rich protein 1, Cysteine-rich protein 1, CRP, CRP1, Epididymis luminal protein 141, HEL-141	-1.54466	-2.80713
Q9BUQ8	DDX23	Probable ATP-dependent RNA helicase DDX23, 3.6.4.13, 100 kDa U5 snRNP-specific protein, DEAD box protein 23, PRP28 homolog, U5-100kD	-0.673508	-2.2851
Q7L8L6	FASTKD5	FAST kinase domain-containing protein 5, mitochondrial	-1.09061	-4.10707
Q8WUA2	PPIL4	Peptidyl-prolyl cis-trans isomerase-like 4, PPIase, 5.2.1.8, Cyclophilin-like protein PPIL4, Rotamase PPIL4	0.421802	-2.491
P49368	CCT3	T-complex protein 1 subunit gamma, TCP-1-gamma, CCT-gamma, hTRiC5	-1.82797	-2.44168
Q9NP81	SARS2	Serine--tRNA ligase, mitochondrial, 6.1.1.11, SerRSmt, Seryl-tRNA synthetase, SerRS, Seryl-tRNA(Ser/Sec) synthetase	-0.867832	-3.79479
Q92665	MRPS31	28S ribosomal protein S31, mitochondrial, MRP-S31, S31mt, Imogen 38, Mitochondrial small ribosomal subunit protein mS31	-0.539749	-3.24033
Q12788	TBL3	Transducin beta-like protein 3, WD repeat-containing protein SAZD	-1.01331	-2.78308
Q7L0Y3	TRMT10C	tRNA methyltransferase 10 homolog C, HBV pre-S2 trans-regulated protein 2, Mitochondrial ribonuclease P protein 1, Mitochondrial RNase P protein 1, RNA (guanine-9-)-methyltransferase domain-containing protein 1, Renal carcinoma antigen NY-REN-49, mRNA methyladenosine-N(1)-methyltransferase, 2.1.1.-, tRNA (adenine(9)-N(1))-methyltransferase, 2.1.1.218, tRNA (guanine(9)-N(1))-methyltransferase, 2.1…	-0.22727	-1.93607
O75390	CS	Citrate synthase, mitochondrial, 2.3.3.1, Citrate (Si)-synthase	-2.01043	-3.17361
Q96RP9	GFM1	Elongation factor G, mitochondrial, EF-Gmt, Elongation factor G 1, mitochondrial, mEF-G 1, Elongation factor G1, hEFG1	-1.08064	-2.82656
Q01780	EXOSC10	Exosome component 10, 3.1.13.-, Autoantigen PM/Scl 2, P100 polymyositis-scleroderma overlap syndrome-associated autoantigen, Polymyositis/scleroderma autoantigen 100 kDa, PM/Scl-100, Polymyositis/scleroderma autoantigen 2	-0.227111	-2.67686
P40763	STAT3	Signal transducer and activator of transcription 3, Acute-phase response factor	-0.943827	-2.29147
P12270	TPR	Nucleoprotein TPR, Megator, NPC-associated intranuclear protein, Translocated promoter region protein	-0.715947	-2.14498
P49411	TUFM	Elongation factor Tu, mitochondrial, EF-Tu, P43	-1.60825	-2.47047
K7EJE8	LONP1	Lon protease homolog, mitochondrial, 3.4.21.53, Lon protease-like protein, LONP, Mitochondrial ATP-dependent protease Lon, Serine protease 15	-1.77691	-2.93955
Q9NWU5	MRPL22	39S ribosomal protein L22, mitochondrial, L22mt, MRP-L22, 39S ribosomal protein L25, mitochondrial, L25mt, MRP-L25, Mitochondrial large ribosomal subunit protein uL22m	-0.342553	-2.61749
Q14697	GANAB	Neutral alpha-glucosidase AB, 3.2.1.207, Alpha-glucosidase 2, Glucosidase II subunit alpha	-1.07631	-2.15422
Q9NNW5	WDR6	WD repeat-containing protein 6	-1.16102	-3.82645
P08670	VIM	Vimentin	-2.02995	-1.61554
P14625	HSP90B1	Endoplasmin, 94 kDa glucose-regulated protein, GRP-94, Heat shock protein 90 kDa beta member 1, Tumor rejection antigen 1, gp96 homolog	-2.15994	-2.58068
P08579	SNRPB2	U2 small nuclear ribonucleoprotein B'', U2 snRNP B''	-1.05901	-2.76275
P50395	GDI2	Rab GDP dissociation inhibitor beta, Rab GDI beta, Guanosine diphosphate dissociation inhibitor 2, GDI-2	-1.61544	-2.32821
Q99714	HSD17B10	3-hydroxyacyl-CoA dehydrogenase type-2, 1.1.1.35, 17-beta-estradiol 17-dehydrogenase, 1.1.1.62, 2-methyl-3-hydroxybutyryl-CoA dehydrogenase, MHBD, 3-alpha-(17-beta)-hydroxysteroid dehydrogenase (NAD(+)), 1.1.1.239, 3-hydroxy-2-methylbutyryl-CoA dehydrogenase, 1.1.1.178, 3-hydroxyacyl-CoA dehydrogenase type II, 3alpha(or 20beta)-hydroxysteroid dehydrogenase, 1.1.1.53, 7-alpha-hydroxysteroid dehydr…	-1.48865	-2.72874
Q9BSC4	NOL10	Nucleolar protein 10	-0.270028	-2.32984
P41252	IARS1	Isoleucine--tRNA ligase, cytoplasmic, 6.1.1.5, Isoleucyl-tRNA synthetase, IRS, IleRS	-1.42155	-2.40659
P34897	SHMT2	Serine hydroxymethyltransferase, mitochondrial, SHMT, 2.1.2.1, Glycine hydroxymethyltransferase, Serine methylase	-1.61731	-2.44262
P61764	STXBP1	Syntaxin-binding protein 1, MUNC18-1, N-Sec1, Protein unc-18 homolog 1, Unc18-1, Protein unc-18 homolog A, Unc-18A, p67	-1.16623	-3.31367
O14980	XPO1	Exportin-1, Exp1, Chromosome region maintenance 1 protein homolog	-2.02439	-3.15283
Q9NYK5	MRPL39	39S ribosomal protein L39, mitochondrial, L39mt, MRP-L39, 39S ribosomal protein L5, mitochondrial, L5mt, MRP-L5, Mitochondrial large ribosomal subunit protein mL39	-0.448256	-2.3426
Q08J23	NSUN2	RNA cytosine C(5)-methyltransferase NSUN2, 2.1.1.-, Myc-induced SUN domain-containing protein, Misu, NOL1/NOP2/Sun domain family member 2, Substrate of AIM1/Aurora kinase B, mRNA cytosine C(5)-methyltransferase, tRNA cytosine C(5)-methyltransferase, 2.1.1.203, tRNA methyltransferase 4 homolog, hTrm4	-0.144632	-1.1091
P54886	ALDH18A1	Delta-1-pyrroline-5-carboxylate synthase, P5CS, Aldehyde dehydrogenase family 18 member A1, Glutamate 5-kinase, GK, 2.7.2.11, Gamma-glutamyl kinase, Gamma-glutamyl phosphate reductase, GPR, 1.2.1.41, Glutamate-5-semialdehyde dehydrogenase, Glutamyl-gamma-semialdehyde dehydrogenase	-0.970092	-2.20218
P09543	CNP	2',3'-cyclic-nucleotide 3'-phosphodiesterase, CNP, CNPase, 3.1.4.37	-2.19893	-4.10291
P55209	NAP1L1	Nucleosome assembly protein 1-like 1, NAP-1-related protein, hNRP	-1.92875	-3.07422
Q9NUL7	DDX28	Probable ATP-dependent RNA helicase DDX28, 3.6.4.13, Mitochondrial DEAD box protein 28	0.080742	-2.30729
P49588	AARS1	Alanine--tRNA ligase, cytoplasmic, 6.1.1.7, Alanyl-tRNA synthetase, AlaRS, Renal carcinoma antigen NY-REN-42	-1.70243	-3.11938
P07737	PFN1	Profilin-1, Epididymis tissue protein Li 184a, Profilin I	-2.27556	-2.54514
Q14204	DYNC1H1	Cytoplasmic dynein 1 heavy chain 1, Cytoplasmic dynein heavy chain 1, Dynein heavy chain, cytosolic	-1.20314	-2.01314
P04075	ALDOA	Fructose-bisphosphate aldolase A, 4.1.2.13, Lung cancer antigen NY-LU-1, Muscle-type aldolase	-2.17335	-2.3496
Q68CQ4	UTP25	U3 small nucleolar RNA-associated protein 25 homolog, Digestive organ expansion factor homolog, UTP25 small subunit processor component	-0.204898	-2.18057
Q8NI27	THOC2	THO complex subunit 2, Tho2, hTREX120	-0.950076	-2.85233
P08195	SLC3A2	4F2 cell-surface antigen heavy chain, 4F2hc, 4F2 heavy chain antigen, Lymphocyte activation antigen 4F2 large subunit, Solute carrier family 3 member 2, CD98	-1.6378	-2.08466
Q9HCJ3	RAVER2	Ribonucleoprotein PTB-binding 2, Protein raver-2	0.581961	-2.01168
P07900	HSP90AA1	Heat shock protein HSP 90-alpha, 3.6.4.10, Heat shock 86 kDa, HSP 86, HSP86, Lipopolysaccharide-associated protein 2, LAP-2, LPS-associated protein 2, Renal carcinoma antigen NY-REN-38	-2.1053	-2.25519
O60610	DIAPH1	Protein diaphanous homolog 1, Diaphanous-related formin-1, DRF1	-1.31503	-2.92809
Q9HCG8	CWC22	Pre-mRNA-splicing factor CWC22 homolog, Nucampholin homolog, fSAPb	-0.489145	-3.62387
Q7L576	CYFIP1	Cytoplasmic FMR1-interacting protein 1, Specifically Rac1-associated protein 1, Sra-1, p140sra-1	-1.5872	-3.36249
P68104	EEF1A1	Elongation factor 1-alpha 1, EF-1-alpha-1, Elongation factor Tu, EF-Tu, Eukaryotic elongation factor 1 A-1, eEF1A-1, Leukocyte receptor cluster member 7	-1.68502	-1.28622
P35580	MYH10	Myosin-10, Cellular myosin heavy chain, type B, Myosin heavy chain 10, Myosin heavy chain, non-muscle IIb, Non-muscle myosin heavy chain B, NMMHC-B, Non-muscle myosin heavy chain IIb, NMMHC II-b, NMMHC-IIB	-1.34023	-2.8487
P56192	MARS1	Methionine--tRNA ligase, cytoplasmic, 6.1.1.10, Methionyl-tRNA synthetase, MetRS	-1.63203	-2.90906
O60763	USO1	General vesicular transport factor p115, Protein USO1 homolog, Transcytosis-associated protein, TAP, Vesicle-docking protein	-2.86602	-4.17183
P62913	RPL11	60S ribosomal protein L11, CLL-associated antigen KW-12, Large ribosomal subunit protein uL5	-1.59152	-2.21177
P10809	HSPD1	60 kDa heat shock protein, mitochondrial, 5.6.1.7, 60 kDa chaperonin, Chaperonin 60, CPN60, Heat shock protein 60, HSP-60, Hsp60, HuCHA60, Mitochondrial matrix protein P1, P60 lymphocyte protein	-1.74943	-1.7945
P09429	HMGB1	High mobility group protein B1, High mobility group protein 1, HMG-1	-1.25496	-1.60512
P00966	ASS1	Argininosuccinate synthase, 6.3.4.5, Citrulline--aspartate ligase	-2.05683	-2.4727
Q8NI36	WDR36	WD repeat-containing protein 36, T-cell activation WD repeat-containing protein, TA-WDRP	-1.03695	-2.65483
Q9Y383	LUC7L2	Putative RNA-binding protein Luc7-like 2	-0.886576	-2.55223
P40227	CCT6A	T-complex protein 1 subunit zeta, TCP-1-zeta, Acute morphine dependence-related protein 2, CCT-zeta-1, HTR3, Tcp20	-2.16968	-2.81751
Q07954	LRP1	Prolow-density lipoprotein receptor-related protein 1, LRP-1, Alpha-2-macroglobulin receptor, A2MR, Apolipoprotein E receptor, APOER, CD91	-0.308978	-3.64325
Q9H307	PNN	Pinin, 140 kDa nuclear and cell adhesion-related phosphoprotein, Desmosome-associated protein, Domain-rich serine protein, DRS protein, DRSP, Melanoma metastasis clone A protein, Nuclear protein SDK3, SR-like protein	-0.379232	-1.79075
Q15287	RNPS1	RNA-binding protein with serine-rich domain 1, SR-related protein LDC2	-0.390384	-2.07608
Q9UKA9	PTBP2	Polypyrimidine tract-binding protein 2, Neural polypyrimidine tract-binding protein, Neurally-enriched homolog of PTB, PTB-like protein	0.733355	-1.75102
O43719	HTATSF1	HIV Tat-specific factor 1, Tat-SF1	-1.13734	-3.10891
P15170	GSPT1	Eukaryotic peptide chain release factor GTP-binding subunit ERF3A, Eukaryotic peptide chain release factor subunit 3a, eRF3a, G1 to S phase transition protein 1 homolog	-1.12226	-2.12423
Q14974	KPNB1	Importin subunit beta-1, Importin-90, Karyopherin subunit beta-1, Nuclear factor p97, Pore targeting complex 97 kDa subunit, PTAC97	-1.80521	-2.65222
P20073	ANXA7	Annexin A7, Annexin VII, Annexin-7, Synexin	-1.10015	-2.68436
P06733	ENO1	Alpha-enolase, 4.2.1.11, 2-phospho-D-glycerate hydro-lyase, C-myc promoter-binding protein, Enolase 1, MBP-1, MPB-1, Non-neural enolase, NNE, Phosphopyruvate hydratase, Plasminogen-binding protein	-2.06463	-1.80328
Q00610	CLTC	Clathrin heavy chain 1, Clathrin heavy chain on chromosome 17, CLH-17	-1.81502	-2.11971
P15924	DSP	Desmoplakin, DP, 250/210 kDa paraneoplastic pemphigus antigen	-0.637496	-1.17191
Q2NL82	TSR1	Pre-rRNA-processing protein TSR1 homolog	-0.600598	-1.88469
O00410	IPO5	Importin-5, Imp5, Importin subunit beta-3, Karyopherin beta-3, Ran-binding protein 5, RanBP5	-0.751988	-1.54295
Q13428	TCOF1	Treacle protein, Treacher Collins syndrome protein	-1.30318	-2.37477
Q9Y580	RBM7	RNA-binding protein 7, RNA-binding motif protein 7	0.417936	-2.09943
P07355	ANXA2	Annexin A2, Annexin II, Annexin-2, Calpactin I heavy chain, Calpactin-1 heavy chain, Chromobindin-8, Lipocortin II, Placental anticoagulant protein IV, PAP-IV, Protein I, p36	-2.00118	-2.08826
P35579	MYH9	Myosin, heavy polypeptide 9, non-muscle, isoform CRA_a	-1.72326	-1.69288
P50991	CCT4	T-complex protein 1 subunit delta, TCP-1-delta, CCT-delta, Stimulator of TAR RNA-binding	-1.82693	-2.25611
Q8WVM0	TFB1M	Dimethyladenosine transferase 1, mitochondrial, 2.1.1.-, Mitochondrial 12S rRNA dimethylase 1, Mitochondrial transcription factor B1, h-mtTFB, h-mtTFB1, hTFB1M, mtTFB1, S-adenosylmethionine-6-N', N'-adenosyl(rRNA) dimethyltransferase 1	-0.237267	-3.19415
P08238	HSP90AB1	Heat shock protein HSP 90-beta, HSP 90, Heat shock 84 kDa, HSP 84, HSP84	-1.63713	-1.03502
Q05048	CSTF1	Cleavage stimulation factor subunit 1, CF-1 50 kDa subunit, Cleavage stimulation factor 50 kDa subunit, CSTF 50 kDa subunit, CstF-50	-0.726759	-2.46628
Q7Z2T5	TRMT1L	TRMT1-like protein, 2.1.1.-	-0.0209882	-2.5155
Q9Y5B9	SUPT16H	FACT complex subunit SPT16, Chromatin-specific transcription elongation factor 140 kDa subunit, FACT 140 kDa subunit, FACTp140, Facilitates chromatin transcription complex subunit SPT16, hSPT16	-1.041	-2.00472
Q8N983	MRPL43	39S ribosomal protein L43, mitochondrial, L43mt, MRP-L43, Mitochondrial large ribosomal subunit protein mL43, Mitochondrial ribosomal protein bMRP36a	0.120183	-1.93888
Q9H0A0	NAT10	RNA cytidine acetyltransferase, 2.3.1.-, 18S rRNA cytosine acetyltransferase, N-acetyltransferase 10, N-acetyltransferase-like protein, hALP	-1.05328	-2.0694
Q9Y314	NOSIP	Nitric oxide synthase-interacting protein, E3 ubiquitin-protein ligase NOSIP, 2.3.2.27, RING-type E3 ubiquitin transferase NOSIP, eNOS-interacting protein	-1.26009	-2.9242
P13667	PDIA4	Protein disulfide-isomerase A4, 5.3.4.1, Endoplasmic reticulum resident protein 70, ER protein 70, ERp70, Endoplasmic reticulum resident protein 72, ER protein 72, ERp-72, ERp72	-2.05901	-2.8039
P14618	PKM	Pyruvate kinase PKM, 2.7.1.40, Cytosolic thyroid hormone-binding protein, CTHBP, Opa-interacting protein 3, OIP-3, Pyruvate kinase 2/3, Pyruvate kinase muscle isozyme, Threonine-protein kinase PKM2, 2.7.11.1, Thyroid hormone-binding protein 1, THBP1, Tumor M2-PK, Tyrosine-protein kinase PKM2, 2.7.10.2, p58	-1.96754	-1.63422
P58107	EPPK1	Epiplakin, 450 kDa epidermal antigen	-0.488585	-1.25026
Q5T200	ZC3H13	Zinc finger CCCH domain-containing protein 13	-0.184966	-2.61065
P04792	HSPB1	Heat shock protein beta-1, HspB1, 28 kDa heat shock protein, Estrogen-regulated 24 kDa protein, Heat shock 27 kDa protein, HSP 27, Stress-responsive protein 27, SRP27	-3.30022	-3.29061
P17987	TCP1	T-complex protein 1 subunit alpha, TCP-1-alpha, CCT-alpha	-1.05028	-1.5967
A0A0U1RQF0	FASN	Fatty acid synthase, 1.1.1.100, 1.3.1.39, 2.3.1.38, 2.3.1.39, 2.3.1.41, 2.3.1.85, 3.1.2.14, 4.2.1.59	-1.40476	-1.45308
P42696	RBM34	RNA-binding protein 34, RNA-binding motif protein 34	-0.273225	-1.67256
P17480	UBTF	Nucleolar transcription factor 1, Autoantigen NOR-90, Upstream-binding factor 1, UBF-1	-0.421393	-1.71212
Q9BSH4	TACO1	Translational activator of cytochrome c oxidase 1, Coiled-coil domain-containing protein 44, Translational activator of mitochondrially-encoded cytochrome c oxidase I	-0.96385	-2.74511
Q7Z6Z7	HUWE1	E3 ubiquitin-protein ligase HUWE1, 2.3.2.26, ARF-binding protein 1, ARF-BP1, HECT, UBA and WWE domain-containing protein 1, HECT-type E3 ubiquitin transferase HUWE1, Homologous to E6AP carboxyl terminus homologous protein 9, HectH9, Large structure of UREB1, LASU1, Mcl-1 ubiquitin ligase E3, Mule, Upstream regulatory element-binding protein 1, URE-B1, URE-binding protein 1	-1.82841	-2.8084
P48643	CCT5	T-complex protein 1 subunit epsilon, TCP-1-epsilon, CCT-epsilon	-2.12411	-2.30753
P55072	VCP	Transitional endoplasmic reticulum ATPase, TER ATPase, 3.6.4.6, 15S Mg(2+)-ATPase p97 subunit, Valosin-containing protein, VCP	-2.1258	-2.37985
O43707	ACTN4	Alpha-actinin-4, Non-muscle alpha-actinin 4	-2.16049	-2.39801
Q06787	FMR1	Fragile X messenger ribonucleoprotein 1, Fragile X messenger ribonucleoprotein, FMRP, Protein FMR-1	-0.0900303	-1.97579
Q8IZ69	TRMT2A	tRNA (uracil-5-)-methyltransferase homolog A, 2.1.1.35, mRNA (uracil-5-)-methyltransferase TRMT2A, 2.1.1.-	0.0475074	-1.9748
P27797	CALR	Calreticulin, CRP55, Calregulin, Endoplasmic reticulum resident protein 60, ERp60, HACBP, grp60	-2.81637	-2.65756
O00411	POLRMT	DNA-directed RNA polymerase, mitochondrial, MtRPOL, 2.7.7.6	-1.03643	-1.63621

## Sheet: Figure 4B
Figure 4B
Complete list of candidate RBPs with estimated UV-crosslinking efficiencies included as part of Supplementary Table 2. GO-annotations were exported from PANTHER V17.0 (Thomas et al., 2003) and made available in Supplemental Table S5.
Complete MS datasets from SILAC LC-MS/MS analysis of clRNP fractions and LC-MS/MS analysis of input and clRNP fractions included as part of Supplemental Table S1 [Kristofich and Nicchitta, 2023]; see referenced study for additional information on sample prep, SILAC or non-SILAC LC-MS/MS analysis, and data processing.
Estimated S/N ratios for candidate RBPs (i.e., those displaying significant UV-enrichment) which do not contain at least 2 unique peptide matches were not used for estimation of protein-specific UV-crosslinking efficiencies. Proteins with pseudo-log2(S/N) ratios of 10 were excluded from Figure 4A–D.
Log10 normalization of protein UV-crosslinking efficiencies and abundances was performed using the average %CL and %TP values of n = 3 biologically independent replicates respectively.
Figure 4B. Scatterplot, GO-annotated RBPs.						Figure 4B. Scatterplot, other.								Linear regression performed using Line Of Fit feature available on JMP Pro 17.0 with the following settings, Fit: Polynomial; Degree: Linear; Confidence: Fit.
Assigned UniProt ID	Primary gene name	Protein name	(log10(S/N))clRNP	Log10(%CL)		Assigned UniProt ID	Primary gene name	Protein name	(log10(S/N))clRNP	Log10(%CL)
P09651	HNRNPA1	Heterogeneous nuclear ribonucleoprotein A1, hnRNP A1, Helix-destabilizing protein, Single-strand RNA-binding protein, hnRNP core protein A1	1.81613	0.780204		Q10713	PMPCA	Mitochondrial-processing peptidase subunit alpha, Alpha-MPP, Inactive zinc metalloprotease alpha, P-55	1.18088	-0.105502				Test Type	Group (series)	Independent variable(s)	Dependent variable(s)	Statistical test results
P19338	NCL	Nucleolin, Protein C23	1.61607	0.894285		Q9BQC6	MRPL57	Ribosomal protein 63, mitochondrial, hMRP63, Mitochondrial large ribosomal subunit protein mL63, Mitochondrial ribosomal protein 63, Mitochondrial ribosomal protein L57	1.80094	0.584513				Linear Regression	GO-annotated RBPs	Protein S/N in clRNP fractions, (log10(S/N))clRNP.	Protein-specific UV-crosslinking efficiency, log10(%CL).	F(1, 764) = 563.14, p < .001
O14979	HNRNPDL	Heterogeneous nuclear ribonucleoprotein D-like, hnRNP D-like, hnRNP DL, AU-rich element RNA-binding factor, JKT41-binding protein, Protein laAUF1	2.253	0.860979		Q9BVS4	RIOK2	Serine/threonine-protein kinase RIO2, 2.7.11.1, RIO kinase 2	1.00281	0.67769				Linear Regression	Other	Protein S/N in clRNP fractions, (log10(S/N))clRNP.	Protein-specific UV-crosslinking efficiency, log10(%CL).	F(1, 296) = 146.06, p < .001
P15880	RPS2	40S ribosomal protein S2, 40S ribosomal protein S4, Protein LLRep3, Small ribosomal subunit protein uS5	1.61613	1.25139		Q96GA3	LTV1	Protein LTV1 homolog	1.49618	0.118277
P51991	HNRNPA3	Heterogeneous nuclear ribonucleoprotein A3, hnRNP A3	1.8363	0.750179		Q9H8Y5	ANKZF1	Ankyrin repeat and zinc finger domain-containing protein 1, Zinc finger protein 744	1.91872	-0.0223608
P46777	RPL5	60S ribosomal protein L5, Large ribosomal subunit protein uL18	1.56232	1.0161		Q9ULX3	NOB1	RNA-binding protein NOB1, 3.1.-.-, Phosphorylation regulatory protein HP-10, Protein ART-4	0.984341	0.222375
P62917	RPL8	60S ribosomal protein L8, Large ribosomal subunit protein uL2	1.52344	1.12365		P30419	NMT1	Glycylpeptide N-tetradecanoyltransferase 1, 2.3.1.97, Myristoyl-CoA:protein N-myristoyltransferase 1, HsNMT1, NMT 1, Type I N-myristoyltransferase, Peptide N-myristoyltransferase 1, Protein-lysine myristoyltransferase NMT1, 2.3.1.-	1.09523	-0.0931814
Q13148	TARDBP	TAR DNA-binding protein 43, TDP-43	1.65242	1.52787		Q13057	COASY	Bifunctional coenzyme A synthase, CoA synthase, NBP, POV-2, Phosphopantetheine adenylyltransferase, 2.7.7.3, Dephospho-CoA pyrophosphorylase, Pantetheine-phosphate adenylyltransferase, PPAT, Dephospho-CoA kinase, DPCK, 2.7.1.24, Dephosphocoenzyme A kinase, DPCOAK	0.839731	0.524167
Q15717	ELAVL1	ELAV-like protein 1, Hu-antigen R, HuR	1.44782	1.66172		P26641	EEF1G	Elongation factor 1-gamma, EF-1-gamma, eEF-1B gamma	0.928587	-1.06392
P22626	HNRNPA2B1	Heterogeneous nuclear ribonucleoproteins A2/B1, hnRNP A2/B1	1.40155	0.931607		P32754	HPD	4-hydroxyphenylpyruvate dioxygenase, 1.13.11.27, 4-hydroxyphenylpyruvic acid oxidase, 4HPPD, HPD, HPPDase	1.27664	-1.32874
P61978	HNRNPK	Heterogeneous nuclear ribonucleoprotein K, hnRNP K, Transformation up-regulated nuclear protein, TUNP	1.60949	0.653256		Q9HC35	EML4	Echinoderm microtubule-associated protein-like 4, EMAP-4, Restrictedly overexpressed proliferation-associated protein, Ropp 120	1.07301	-0.368658
P38159	RBMX	RNA-binding motif protein, X chromosome, Glycoprotein p43, Heterogeneous nuclear ribonucleoprotein G, hnRNP G	1.6997	0.641992		Q9NVU7	SDAD1	Protein SDA1 homolog, Nucleolar protein 130, SDA1 domain-containing protein 1, hSDA	0.952484	0.460705
Q92804	TAF15	TATA-binding protein-associated factor 2N, 68 kDa TATA-binding protein-associated factor, TAF(II)68, TAFII68, RNA-binding protein 56	1.98175	0.872205		Q92576	PHF3	PHD finger protein 3	1.29391	0.545638
P52272	HNRNPM	Heterogeneous nuclear ribonucleoprotein M, hnRNP M	1.32788	1.2933		Q13123	IK	Protein Red, Cytokine IK, IK factor, Protein RER	0.802292	0.256274
P16989	YBX3	Y-box-binding protein 3, Cold shock domain-containing protein A, DNA-binding protein A, Single-strand DNA-binding protein NF-GMB	1.63013	0.959988		P48651	PTDSS1	Phosphatidylserine synthase 1, PSS-1, PtdSer synthase 1, 2.7.8.29, Serine-exchange enzyme I	1.25186	0.0347665
P49207	RPL34	60S ribosomal protein L34, Large ribosomal subunit protein eL34	1.62053	0.739255		Q9C0C2	TNKS1BP1	182 kDa tankyrase-1-binding protein	1.26259	-0.136899
Q07666	KHDRBS1	KH domain-containing, RNA-binding, signal transduction-associated protein 1, GAP-associated tyrosine phosphoprotein p62, Src-associated in mitosis 68 kDa protein, Sam68, p21 Ras GTPase-activating protein-associated p62, p68	1.80109	0.823197		O75822	EIF3J	Eukaryotic translation initiation factor 3 subunit J, eIF3j, Eukaryotic translation initiation factor 3 subunit 1, eIF-3-alpha, eIF3 p35	0.866232	-0.28613
Q00577	PURA	Transcriptional activator protein Pur-alpha, Purine-rich single-stranded DNA-binding protein alpha	2.2607	0.865046		P52732	KIF11	Kinesin-like protein KIF11, Kinesin-like protein 1, Kinesin-like spindle protein HKSP, Kinesin-related motor protein Eg5, Thyroid receptor-interacting protein 5, TR-interacting protein 5, TRIP-5	1.67619	-0.72885
P23246	SFPQ	Splicing factor, proline- and glutamine-rich, 100 kDa DNA-pairing protein, hPOMp100, DNA-binding p52/p100 complex, 100 kDa subunit, Polypyrimidine tract-binding protein-associated-splicing factor, PSF, PTB-associated-splicing factor	1.42354	1.06438		P42166	TMPO	Lamina-associated polypeptide 2, isoform alpha, Thymopoietin isoform alpha, TP alpha, Thymopoietin-related peptide isoform alpha, TPRP isoform alpha	1.1188	-1.24743
P47914	RPL29	60S ribosomal protein L29, Cell surface heparin-binding protein HIP, Large ribosomal subunit protein eL29	1.67115	0.664064		Q9H089	LSG1	Large subunit GTPase 1 homolog, hLsg1, 3.6.1.-	1.16027	-0.0396717
P52597	HNRNPF	Heterogeneous nuclear ribonucleoprotein F, hnRNP F, Nucleolin-like protein mcs94-1	1.45781	1.17422		Q9NWT1	PAK1IP1	p21-activated protein kinase-interacting protein 1, PAK/PLC-interacting protein 1, hPIP1, PAK1-interacting protein 1, WD repeat-containing protein 84	1.25944	-0.930328
P83731	RPL24	60S ribosomal protein L24, 60S ribosomal protein L30, Large ribosomal subunit protein eL24	1.71309	0.313881		Q9Y6K0	CEPT1	Choline/ethanolaminephosphotransferase 1, hCEPT1, 2.7.8.1, 2.7.8.2, 1-alkenyl-2-acylglycerol choline phosphotransferase, 2.7.8.22	1.1954	0.0670129
Q9UKM9	RALY	RNA-binding protein Raly, Autoantigen p542, Heterogeneous nuclear ribonucleoprotein C-like 2, hnRNP core protein C-like 2, hnRNP associated with lethal yellow protein homolog	1.47503	1.31076		P40222	TXLNA	Alpha-taxilin	1.02249	-0.833738
Q8NC51	SERBP1	Plasminogen activator inhibitor 1 RNA-binding protein, PAI1 RNA-binding protein 1, PAI-RBP1, SERPINE1 mRNA-binding protein 1	1.43685	0.686732		Q9Y295	DRG1	Developmentally-regulated GTP-binding protein 1, DRG-1, Neural precursor cell expressed developmentally down-regulated protein 3, NEDD-3, Translation factor GTPase DRG1, TRAFAC GTPase DRG1, 3.6.5.-	0.842164	-0.262942
Q96EP5	DAZAP1	DAZ-associated protein 1, Deleted in azoospermia-associated protein 1	1.68182	0.976306		P82663	MRPS25	28S ribosomal protein S25, mitochondrial, MRP-S25, S25mt, Mitochondrial small ribosomal subunit protein mS25	1.11202	-0.182448
O75534	CSDE1	Cold shock domain-containing protein E1, N-ras upstream gene protein, Protein UNR	1.42302	1.14611		Q6NUQ4	TMEM214	Transmembrane protein 214	1.49131	-0.814857
Q14011	CIRBP	Cold-inducible RNA-binding protein, A18 hnRNP, Glycine-rich RNA-binding protein CIRP	1.93105	0.874706		P29692	EEF1D	Elongation factor 1-delta, EF-1-delta, Antigen NY-CO-4	1.06632	-1.50645
P35268	RPL22	60S ribosomal protein L22, EBER-associated protein, EAP, Epstein-Barr virus small RNA-associated protein, Heparin-binding protein HBp15, Large ribosomal subunit protein eL22	1.51569	0.64444		Q9NRX2	MRPL17	39S ribosomal protein L17, mitochondrial, L17mt, MRP-L17, LYST-interacting protein 2, Mitochondrial large ribosomal subunit protein bL17m	0.859252	-0.254948
P31943	HNRNPH1	Heterogeneous nuclear ribonucleoprotein H, hnRNP H	1.38449	1.10977		Q12802	AKAP13	A-kinase anchor protein 13, AKAP-13, AKAP-Lbc, Breast cancer nuclear receptor-binding auxiliary protein, Guanine nucleotide exchange factor Lbc, Human thyroid-anchoring protein 31, Lymphoid blast crisis oncogene, LBC oncogene, Non-oncogenic Rho GTPase-specific GTP exchange factor, Protein kinase A-anchoring protein 13, PRKA13, p47	1.42055	-0.254519
Q00839	HNRNPU	Heterogeneous nuclear ribonucleoprotein U, hnRNP U, GRIP120, Nuclear p120 ribonucleoprotein, Scaffold-attachment factor A, SAF-A, p120, pp120	1.35123	0.767511		A1X283	SH3PXD2B	SH3 and PX domain-containing protein 2B, Adapter protein HOFI, Factor for adipocyte differentiation 49, Tyrosine kinase substrate with four SH3 domains	0.974806	-0.179028
O43390	HNRNPR	Heterogeneous nuclear ribonucleoprotein R, hnRNP R	1.47056	0.995693		Q9NUQ8	ABCF3	ATP-binding cassette sub-family F member 3	0.768828	0.000377097
P62841	RPS15	40S ribosomal protein S15, RIG protein, Small ribosomal subunit protein uS19	1.52017	0.759047		P53582	METAP1	Methionine aminopeptidase 1, MAP 1, MetAP 1, 3.4.11.18, Peptidase M 1	0.786288	-0.225366
Q01130	SRSF2	Serine/arginine-rich splicing factor 2, Protein PR264, Splicing component, 35 kDa, Splicing factor SC35, SC-35, Splicing factor, arginine/serine-rich 2	1.75435	0.486847		Q9UG63	ABCF2	ATP-binding cassette sub-family F member 2, Iron-inhibited ABC transporter 2	0.587386	-0.0849054
Q96I24	FUBP3	Far upstream element-binding protein 3, FUSE-binding protein 3	1.41773	1.43061		O95602	POLR1A	DNA-directed RNA polymerase I subunit RPA1, RNA polymerase I subunit A1, 2.7.7.6, A190, DNA-directed RNA polymerase I largest subunit, DNA-directed RNA polymerase I subunit A, RNA polymerase I 194 kDa subunit, RPA194	0.9702	-0.966396
P35637	FUS	RNA-binding protein FUS, 75 kDa DNA-pairing protein, Oncogene FUS, Oncogene TLS, POMp75, Translocated in liposarcoma protein	1.5156	0.862906		Q13724	MOGS	Mannosyl-oligosaccharide glucosidase, 3.2.1.106, Processing A-glucosidase I	1.1469	-0.916438
P61353	RPL27	60S ribosomal protein L27, Large ribosomal subunit protein eL27	1.59403	0.146395		Q9NXF1	TEX10	Testis-expressed protein 10	0.766763	-0.184748
Q01085	TIAL1	Nucleolysin TIAR, TIA-1-related protein	1.54821	1.41247		O75340	PDCD6	Programmed cell death protein 6, Apoptosis-linked gene 2 protein homolog, ALG-2	0.764936	-0.645565
P07910	HNRNPC	Heterogeneous nuclear ribonucleoproteins C1/C2, hnRNP C1/C2	1.25343	1.01085		Q9P2D0	IBTK	Inhibitor of Bruton tyrosine kinase, IBtk	0.881893	0.164848
P26599	PTBP1	Polypyrimidine tract-binding protein 1, PTB, 57 kDa RNA-binding protein PPTB-1, Heterogeneous nuclear ribonucleoprotein I, hnRNP I	1.26536	1.0636		Q5VT52	RPRD2	Regulation of nuclear pre-mRNA domain-containing protein 2	0.983877	-0.268667
Q14444	CAPRIN1	Caprin-1, Cell cycle-associated protein 1, Cytoplasmic activation- and proliferation-associated protein 1, GPI-anchored membrane protein 1, GPI-anchored protein p137, GPI-p137, p137GPI, Membrane component chromosome 11 surface marker 1, RNA granule protein 105	1.67089	0.391557		Q9BYW2	SETD2	Histone-lysine N-methyltransferase SETD2, 2.1.1.359, HIF-1, Huntingtin yeast partner B, Huntingtin-interacting protein 1, HIP-1, Huntingtin-interacting protein B, Lysine N-methyltransferase 3A, Protein-lysine N-methyltransferase SETD2, 2.1.1.-, SET domain-containing protein 2, hSET2, p231HBP	0.617813	-0.546741
P31942	HNRNPH3	Heterogeneous nuclear ribonucleoprotein H3, hnRNP H3, Heterogeneous nuclear ribonucleoprotein 2H9, hnRNP 2H9	1.47404	1.12706		Q14247	CTTN	Src substrate cortactin, Amplaxin, Oncogene EMS1	0.75609	-1.11519
O60506	SYNCRIP	Heterogeneous nuclear ribonucleoprotein Q, hnRNP Q, Glycine- and tyrosine-rich RNA-binding protein, GRY-RBP, NS1-associated protein 1, Synaptotagmin-binding, cytoplasmic RNA-interacting protein	1.28635	1.17469		Q92688	ANP32B	Acidic leucine-rich nuclear phosphoprotein 32 family member B, Acidic protein rich in leucines, Putative HLA-DR-associated protein I-2, PHAPI2, Silver-stainable protein SSP29	0.704532	-1.00566
Q02543	RPL18A	60S ribosomal protein L18a, Large ribosomal subunit protein eL20	1.40327	0.746047		O14730	RIOK3	Serine/threonine-protein kinase RIO3, 2.7.11.1, RIO kinase 3, sudD homolog	0.923969	1.09822
A0AV96	RBM47	RNA-binding protein 47, RNA-binding motif protein 47	1.62317	1.63833		P46063	RECQL	ATP-dependent DNA helicase Q1, 3.6.4.12, DNA helicase, RecQ-like type 1, RecQ1, DNA-dependent ATPase Q1, RecQ protein-like 1	0.942948	-1.35391
Q13151	HNRNPA0	Heterogeneous nuclear ribonucleoprotein A0, hnRNP A0	1.51558	0.846802		Q96T88	UHRF1	E3 ubiquitin-protein ligase UHRF1, 2.3.2.27, Inverted CCAAT box-binding protein of 90 kDa, Nuclear protein 95, Nuclear zinc finger protein Np95, HuNp95, hNp95, RING finger protein 106, RING-type E3 ubiquitin transferase UHRF1, Transcription factor ICBP90, Ubiquitin-like PHD and RING finger domain-containing protein 1, hUHRF1, Ubiquitin-like-containing PHD and RING finger domains protein 1	0.986114	-1.16141
P62280	RPS11	40S ribosomal protein S11, Small ribosomal subunit protein uS17	1.40471	0.457221		P33176	KIF5B	Kinesin-1 heavy chain, Conventional kinesin heavy chain, Ubiquitous kinesin heavy chain, UKHC	0.792827	-1.33232
O76021	RSL1D1	Ribosomal L1 domain-containing protein 1, CATX-11, Cellular senescence-inhibited gene protein, Protein PBK1	1.49152	0.49157		Q92974	ARHGEF2	Rho guanine nucleotide exchange factor 2, Guanine nucleotide exchange factor H1, GEF-H1, Microtubule-regulated Rho-GEF, Proliferating cell nucleolar antigen p40	0.7995	-0.558456
Q9GZR2	REXO4	RNA exonuclease 4, 3.1.-.-, Exonuclease XPMC2, Prevents mitotic catastrophe 2 protein homolog, hPMC2	2.50101	0.326745		Q15084	PDIA6	Protein disulfide-isomerase A6, 5.3.4.1, Endoplasmic reticulum protein 5, ER protein 5, ERp5, Protein disulfide isomerase P5, Thioredoxin domain-containing protein 7	0.733004	-1.32689
Q14103	HNRNPD	Heterogeneous nuclear ribonucleoprotein D0, hnRNP D0, AU-rich element RNA-binding protein 1	1.39714	0.755771		Q8WXX5	DNAJC9	DnaJ homolog subfamily C member 9, HDJC9, DnaJ protein SB73	1.02166	-1.13968
Q15233	NONO	Non-POU domain-containing octamer-binding protein, NonO protein, 54 kDa nuclear RNA- and DNA-binding protein, p54(nrb), p54nrb, 55 kDa nuclear protein, NMT55, DNA-binding p52/p100 complex, 52 kDa subunit	1.24325	1.1199		P37802	TAGLN2	Transgelin-2, Epididymis tissue protein Li 7e, SM22-alpha homolog	0.723492	-1.58535
P14866	HNRNPL	Heterogeneous nuclear ribonucleoprotein L, hnRNP L	1.23313	1.09432		O43776	NARS1	Asparagine--tRNA ligase, cytoplasmic, 6.1.1.22, Asparaginyl-tRNA synthetase, AsnRS, Asparaginyl-tRNA synthetase 1	0.628123	-0.998393
Q96PK6	RBM14	RNA-binding protein 14, Paraspeckle protein 2, PSP2, RNA-binding motif protein 14, RRM-containing coactivator activator/modulator, Synaptotagmin-interacting protein, SYT-interacting protein	1.399	1.07503		P78347	GTF2I	General transcription factor II-I, GTFII-I, TFII-I, Bruton tyrosine kinase-associated protein 135, BAP-135, BTK-associated protein 135, SRF-Phox1-interacting protein, SPIN, Williams-Beuren syndrome chromosomal region 6 protein	0.7191	-1.25038
P18124	RPL7	60S ribosomal protein L7, Large ribosomal subunit protein uL30	1.39728	0.165541		P43307	SSR1	Translocon-associated protein subunit alpha, TRAP-alpha, Signal sequence receptor subunit alpha, SSR-alpha	0.78475	-0.903465
P39019	RPS19	40S ribosomal protein S19, Small ribosomal subunit protein eS19	1.90767	-0.859285		Q9H7E9	C8orf33	UPF0488 protein C8orf33	0.724272	-0.727837
Q99729	HNRNPAB	Heterogeneous nuclear ribonucleoprotein A/B, hnRNP A/B, APOBEC1-binding protein 1, ABBP-1	1.40136	0.870108		Q99661	KIF2C	Kinesin-like protein KIF2C, Kinesin-like protein 6, Mitotic centromere-associated kinesin, MCAK	0.629522	-0.41734
Q13283	G3BP1	Ras GTPase-activating protein-binding protein 1, G3BP-1, 3.6.4.12, 3.6.4.13, ATP-dependent DNA helicase VIII, hDH VIII, GAP SH3 domain-binding protein 1	1.5266	0.501959		Q9BQ70	TCF25	Transcription factor 25, TCF-25, Nuclear localized protein 1	0.693134	0.200826
Q96AE4	FUBP1	Far upstream element-binding protein 1, FBP, FUSE-binding protein 1, DNA helicase V, hDH V	1.39871	0.786686		Q8IVF2	AHNAK2	Protein AHNAK2	0.750794	-0.143393
P29558	RBMS1	RNA-binding motif, single-stranded-interacting protein 1, Single-stranded DNA-binding protein MSSP-1, Suppressor of CDC2 with RNA-binding motif 2	1.82592	0.950944		O75521	ECI2	Enoyl-CoA delta isomerase 2, 5.3.3.8, DRS-1, Delta(3),delta(2)-enoyl-CoA isomerase, D3,D2-enoyl-CoA isomerase, Diazepam-binding inhibitor-related protein 1, DBI-related protein 1, Dodecenoyl-CoA isomerase, Hepatocellular carcinoma-associated antigen 88, Peroxisomal 3,2-trans-enoyl-CoA isomerase, pECI, Renal carcinoma antigen NY-REN-1	0.859449	-1.33104
Q9HCE1	MOV10	Helicase MOV-10, 3.6.4.13, Armitage homolog, Moloney leukemia virus 10 protein	1.52058	0.818687		Q12769	NUP160	Nuclear pore complex protein Nup160, 160 kDa nucleoporin, Nucleoporin Nup160	0.63782	-0.702674
P50914	RPL14	60S ribosomal protein L14, CAG-ISL 7, Large ribosomal subunit protein eL14	1.39522	0.481842		Q13813	SPTAN1	Spectrin alpha chain, non-erythrocytic 1, Alpha-II spectrin, Fodrin alpha chain, Spectrin, non-erythroid alpha subunit	0.376589	-0.277997
Q86V81	ALYREF	THO complex subunit 4, Tho4, Ally of AML-1 and LEF-1, Aly/REF export factor, Transcriptional coactivator Aly/REF, bZIP-enhancing factor BEF	1.50589	0.263401		Q96GW9	MARS2	Methionine--tRNA ligase, mitochondrial, 6.1.1.10, Methionyl-tRNA synthetase 2, Mitochondrial methionyl-tRNA synthetase, MtMetRS	0.866626	0.403012
P62979	RPS27A	Ubiquitin-40S ribosomal protein S27a, Ubiquitin carboxyl extension protein 80	1.55859	-0.358288		Q9BRS2	RIOK1	Serine/threonine-protein kinase RIO1, 2.7.11.1, 3.6.3.-, RIO kinase 1	0.538115	-0.13169
P62750	RPL23A	60S ribosomal protein L23a, Large ribosomal subunit protein uL23	1.82082	-0.571362		Q9Y2A7	NCKAP1	Nck-associated protein 1, NAP 1, Membrane-associated protein HEM-2, p125Nap1	0.862814	-1.05671
P84098	RPL19	60S ribosomal protein L19, Large ribosomal subunit protein eL19	1.61079	-0.0868857		Q9NTK5	OLA1	Obg-like ATPase 1, DNA damage-regulated overexpressed in cancer 45, DOC45, GTP-binding protein 9	0.486675	-0.594481
Q92879	CELF1	CUGBP Elav-like family member 1, CELF-1, 50 kDa nuclear polyadenylated RNA-binding protein, Bruno-like protein 2, CUG triplet repeat RNA-binding protein 1, CUG-BP1, CUG-BP- and ETR-3-like factor 1, Deadenylation factor CUG-BP, Embryo deadenylation element-binding protein homolog, EDEN-BP homolog, RNA-binding protein BRUNOL-2	1.20551	1.74587		Q9BX10	GTPBP2	GTP-binding protein 2	1.04396	0.145339
Q15365	PCBP1	Poly(rC)-binding protein 1, Alpha-CP1, Heterogeneous nuclear ribonucleoprotein E1, hnRNP E1, Nucleic acid-binding protein SUB2.3	1.27113	0.692985		Q96HC4	PDLIM5	PDZ and LIM domain protein 5, Enigma homolog, Enigma-like PDZ and LIM domains protein	0.585887	-1.12174
Q8IWA0	WDR75	WD repeat-containing protein 75, U3 small nucleolar RNA-associated protein 17 homolog	1.53211	0.878885		Q8TDB6	DTX3L	E3 ubiquitin-protein ligase DTX3L, 2.3.2.27, B-lymphoma- and BAL-associated protein, Protein deltex-3-like, RING-type E3 ubiquitin transferase DTX3L, Rhysin-2, Rhysin2	2.41991	-0.420151
Q9NR30	DDX21	Nucleolar RNA helicase 2, 3.6.4.13, DEAD box protein 21, Gu-alpha, Nucleolar RNA helicase Gu, Nucleolar RNA helicase II, RH II/Gu	1.26395	0.537008		Q93009	USP7	Ubiquitin carboxyl-terminal hydrolase 7, 3.4.19.12, Deubiquitinating enzyme 7, Herpesvirus-associated ubiquitin-specific protease, Ubiquitin thioesterase 7, Ubiquitin-specific-processing protease 7	0.57261	-1.0763
P62081	RPS7	40S ribosomal protein S7, Small ribosomal subunit protein eS7	1.51993	-0.140697		O95613	PCNT	Pericentrin, Kendrin, Pericentrin-B	1.0237	0.340567
Q7KZF4	SND1	Staphylococcal nuclease domain-containing protein 1, 3.1.31.1, 100 kDa coactivator, EBNA2 coactivator p100, Tudor domain-containing protein 11, p100 co-activator	1.2303	0.780434		Q8TAE8	GADD45GIP1	Growth arrest and DNA damage-inducible proteins-interacting protein 1, 39S ribosomal protein L59, mitochondrial, MRP-L59, CKII beta-associating protein, CR6-interacting factor 1, CRIF1, Mitochondrial large ribosomal subunit protein mL64, Papillomavirus L2-interacting nuclear protein 1, PLINP, PLINP-1, p53-responsive gene 6 protein	0.626591	-0.210498
P98179	RBM3	RNA-binding protein 3, RNA-binding motif protein 3, RNPL	1.3714	0.985136		Q12899	TRIM26	Tripartite motif-containing protein 26, 2.3.2.27, Acid finger protein, AFP, RING finger protein 95, Zinc finger protein 173	0.945469	-0.449349
Q13310	PABPC4	Polyadenylate-binding protein 4, PABP-4, Poly(A)-binding protein 4, Activated-platelet protein 1, APP-1, Inducible poly(A)-binding protein, iPABP	1.3705	0.374974		O94874	UFL1	E3 UFM1-protein ligase 1, 2.3.2.-, E3 UFM1-protein transferase 1, Multiple alpha-helix protein located at ER, Novel LZAP-binding protein, Regulator of C53/LZAP and DDRGK1	1.0993	-0.352132
Q92945	KHSRP	Far upstream element-binding protein 2, FUSE-binding protein 2, KH type-splicing regulatory protein, KSRP, p75	1.08817	1.54217		O43813	LANCL1	Glutathione S-transferase LANCL1, 2.5.1.18, 40 kDa erythrocyte membrane protein, p40, LanC-like protein 1	0.594938	-1.19218
Q08211	DHX9	ATP-dependent RNA helicase A, 3.6.4.13, DEAH box protein 9, DExH-box helicase 9, Leukophysin, LKP, Nuclear DNA helicase II, NDH II, RNA helicase A	1.19695	0.643424		Q9Y4W6	AFG3L2	AFG3-like protein 2, 3.4.24.-, Paraplegin-like protein	0.339667	0.0274583
P62753	RPS6	40S ribosomal protein S6, Phosphoprotein NP33, Small ribosomal subunit protein eS6	1.34463	0.167391		Q14146	URB2	Unhealthy ribosome biogenesis protein 2 homolog	0.817761	-0.825141
P46783	RPS10	40S ribosomal protein S10, Small ribosomal subunit protein eS10	1.61733	-0.10929		P49419	ALDH7A1	Alpha-aminoadipic semialdehyde dehydrogenase, Alpha-AASA dehydrogenase, 1.2.1.31, Aldehyde dehydrogenase family 7 member A1, 1.2.1.3, Antiquitin-1, Betaine aldehyde dehydrogenase, 1.2.1.8, Delta1-piperideine-6-carboxylate dehydrogenase, P6c dehydrogenase	0.74938	-1.37346
P62995	TRA2B	Transformer-2 protein homolog beta, TRA-2 beta, TRA2-beta, hTRA2-beta, Splicing factor, arginine/serine-rich 10, Transformer-2 protein homolog B	1.51184	0.374439		Q14980	NUMA1	Nuclear mitotic apparatus protein 1, Nuclear matrix protein-22, NMP-22, Nuclear mitotic apparatus protein, NuMA protein, SP-H antigen	0.451804	-0.951261
P23396	RPS3	40S ribosomal protein S3, 4.2.99.18, Small ribosomal subunit protein uS3	1.25036	0.0749479		Q9Y2T2	AP3M1	AP-3 complex subunit mu-1, AP-3 adaptor complex mu3A subunit, Adaptor-related protein complex 3 subunit mu-1, Mu-adaptin 3A, Mu3A-adaptin	0.387686	-0.514895
P11940	PABPC1	Polyadenylate-binding protein 1, PABP-1, Poly(A)-binding protein 1	1.18756	0.497337		P31689	DNAJA1	DnaJ homolog subfamily A member 1, DnaJ protein homolog 2, HSDJ, Heat shock 40 kDa protein 4, Heat shock protein J2, HSJ-2, Human DnaJ protein 2, hDj-2	0.3939	-1.37003
P43243	MATR3	Matrin-3	1.18152	0.773796		P49454	CENPF	Centromere protein F, CENP-F, AH antigen, Kinetochore protein CENPF, Mitosin	0.734052	-0.232266
P40429	RPL13A	60S ribosomal protein L13a, 23 kDa highly basic protein, Large ribosomal subunit protein uL13	1.44981	-0.0243376		O15067	PFAS	Phosphoribosylformylglycinamidine synthase, FGAM synthase, FGAMS, 6.3.5.3, Formylglycinamide ribonucleotide amidotransferase, FGAR amidotransferase, FGAR-AT, Formylglycinamide ribotide amidotransferase, Phosphoribosylformylglycineamide amidotransferase	0.462522	-1.45952
Q5T6F2	UBAP2	Ubiquitin-associated protein 2, UBAP-2, RNA polymerase II degradation factor UBAP2	1.56165	1.00193		P61221	ABCE1	ATP-binding cassette sub-family E member 1, 2'-5'-oligoadenylate-binding protein, HuHP68, RNase L inhibitor, Ribonuclease 4 inhibitor, RNS4I	0.599205	-1.48976
P55795	HNRNPH2	Heterogeneous nuclear ribonucleoprotein H2, hnRNP H2, FTP-3, Heterogeneous nuclear ribonucleoprotein H', hnRNP H'	1.32886	1.10288		P49406	MRPL19	39S ribosomal protein L19, mitochondrial, L19mt, MRP-L19, 39S ribosomal protein L15, mitochondrial, L15mt, MRP-L15, Mitochondrial large ribosomal subunit protein bL19m	0.468606	-0.780054
Q01844	EWSR1	RNA-binding protein EWS, EWS oncogene, Ewing sarcoma breakpoint region 1 protein	1.46051	0.503767		Q96DV4	MRPL38	39S ribosomal protein L38, mitochondrial, L38mt, MRP-L38, Mitochondrial large ribosomal subunit protein mL38	0.440792	-0.27093
Q15366	PCBP2	Poly(rC)-binding protein 2, Alpha-CP2, Heterogeneous nuclear ribonucleoprotein E2, hnRNP E2	1.3543	0.499513		O60716	CTNND1	Catenin delta-1, Cadherin-associated Src substrate, CAS, p120 catenin, p120(ctn), p120(cas)	0.389324	-0.573121
Q15434	RBMS2	RNA-binding motif, single-stranded-interacting protein 2, Suppressor of CDC2 with RNA-binding motif 3	1.91129	1.53731		P06744	GPI	Glucose-6-phosphate isomerase, GPI, 5.3.1.9, Autocrine motility factor, AMF, Neuroleukin, NLK, Phosphoglucose isomerase, PGI, Phosphohexose isomerase, PHI, Sperm antigen 36, SA-36	0.189669	0.0516888
O00571	DDX3X	ATP-dependent RNA helicase DDX3X, 3.6.4.13, CAP-Rf, DEAD box protein 3, X-chromosomal, DEAD box, X isoform, DBX, Helicase-like protein 2, HLP2	1.18315	0.570379		Q9Y450	HBS1L	HBS1-like protein, ERFS	0.689032	-0.682085
Q9Y4C8	RBM19	Probable RNA-binding protein 19, RNA-binding motif protein 19	1.30274	0.815056		Q9HCS7	XAB2	Pre-mRNA-splicing factor SYF1, Protein HCNP, XPA-binding protein 2	0.464298	-1.0823
P62910	RPL32	60S ribosomal protein L32, Large ribosomal subunit protein eL32	1.68629	-0.443351		P02545	LMNA	Prelamin-A/C	0.303912	-1.7441
Q92841	DDX17	Probable ATP-dependent RNA helicase DDX17, 3.6.4.13, DEAD box protein 17, DEAD box protein p72, DEAD box protein p82, RNA-dependent helicase p72	1.30494	0.521535		P35573	AGL	Glycogen debranching enzyme, Glycogen debrancher, 4-alpha-glucanotransferase, 2.4.1.25, Oligo-1,4-1,4-glucantransferase, Amylo-alpha-1,6-glucosidase, Amylo-1,6-glucosidase, 3.2.1.33, Dextrin 6-alpha-D-glucosidase	0.353676	-1.07937
O15371	EIF3D	Eukaryotic translation initiation factor 3 subunit D, eIF3d, Eukaryotic translation initiation factor 3 subunit 7, eIF-3-zeta, eIF3 p66	1.41944	0.253434		Q70E73	RAPH1	Ras-associated and pleckstrin homology domains-containing protein 1, RAPH1, Amyotrophic lateral sclerosis 2 chromosomal region candidate gene 18 protein, Amyotrophic lateral sclerosis 2 chromosomal region candidate gene 9 protein, Lamellipodin, Proline-rich EVH1 ligand 2, PREL-2, Protein RMO1	1.08464	-0.426393
P51114	FXR1	RNA-binding protein FXR1, FMR1 autosomal homolog 1, hFXR1p	1.48751	0.389742		Q14CX7	NAA25	N-alpha-acetyltransferase 25, NatB auxiliary subunit, Mitochondrial distribution and morphology protein 20, N-terminal acetyltransferase B complex subunit MDM20, NatB complex subunit MDM20, N-terminal acetyltransferase B complex subunit NAA25, p120	0.400872	-0.880323
Q13595	TRA2A	Transformer-2 protein homolog alpha, TRA-2 alpha, TRA2-alpha, Transformer-2 protein homolog A	1.62158	0.286746		Q16531	DDB1	DNA damage-binding protein 1, DDB p127 subunit, DNA damage-binding protein a, DDBa, Damage-specific DNA-binding protein 1, HBV X-associated protein 1, XAP-1, UV-damaged DNA-binding factor, UV-damaged DNA-binding protein 1, UV-DDB 1, XPE-binding factor, XPE-BF, Xeroderma pigmentosum group E-complementing protein, XPCe	0.354627	-1.58159
P05455	SSB	Lupus La protein, La autoantigen, La ribonucleoprotein, Sjoegren syndrome type B antigen, SS-B	1.37824	0.483401		P54132	BLM	RecQ-like DNA helicase BLM, 3.6.4.12, Bloom syndrome protein, DNA helicase, RecQ-like type 2, RecQ2, RecQ protein-like 3	0.660833	-0.286915
Q96CM3	RPUSD4	Pseudouridylate synthase RPUSD4, mitochondrial, 5.4.99.-, RNA pseudouridylate synthase domain-containing protein 4	1.96868	0.943135		A6NHR9	SMCHD1	Structural maintenance of chromosomes flexible hinge domain-containing protein 1, SMC hinge domain-containing protein 1, 3.6.1.-	0.478577	-1.15943
P62269	RPS18	40S ribosomal protein S18, Ke-3, Ke3, Small ribosomal subunit protein uS13	1.42116	-0.420079		Q86XL3	ANKLE2	Ankyrin repeat and LEM domain-containing protein 2, LEM domain-containing protein 4	0.350255	-0.0503274
P31483	TIA1	Cytotoxic granule associated RNA binding protein TIA1, Nucleolysin TIA-1 isoform p40, RNA-binding protein TIA-1, T-cell-restricted intracellular antigen-1, TIA-1, p40-TIA-1	1.37919	1.32918		Q9NSV4	DIAPH3	Protein diaphanous homolog 3, Diaphanous-related formin-3, DRF3, MDia2	0.343524	0.176857
P62847	RPS24	40S ribosomal protein S24, Small ribosomal subunit protein eS24	1.24228	0.716176		Q63HN8	RNF213	E3 ubiquitin-protein ligase RNF213, 2.3.2.27, 3.6.4.-, ALK lymphoma oligomerization partner on chromosome 17, E3 ubiquitin-lipopolysaccharide ligase RNF213, 2.3.2.-, Mysterin, RING finger protein 213	0.360206	-0.717072
Q9BZE4	GTPBP4	GTP-binding protein 4, Chronic renal failure gene protein, GTP-binding protein NGB, Nucleolar GTP-binding protein 1	1.36728	0.314854		Q12789	GTF3C1	General transcription factor 3C polypeptide 1, TF3C-alpha, TFIIIC box B-binding subunit, Transcription factor IIIC 220 kDa subunit, TFIIIC 220 kDa subunit, TFIIIC220, Transcription factor IIIC subunit alpha	0.530025	-0.986506
Q8TDD1	DDX54	ATP-dependent RNA helicase DDX54, 3.6.4.13, ATP-dependent RNA helicase DP97, DEAD box RNA helicase 97 kDa, DEAD box protein 54	1.3007	0.51026		P46734	MAP2K3	Dual specificity mitogen-activated protein kinase kinase 3, MAP kinase kinase 3, MAPKK 3, 2.7.12.2, MAPK/ERK kinase 3, MEK 3, Stress-activated protein kinase kinase 2, SAPK kinase 2, SAPKK-2, SAPKK2	0.382859	-0.742491
Q8WXF1	PSPC1	Paraspeckle component 1, Paraspeckle protein 1	1.37958	1.07382		Q96E11	MRRF	Ribosome-recycling factor, mitochondrial, RRF, Ribosome-releasing factor, mitochondrial	0.606165	-1.36782
P17844	DDX5	Probable ATP-dependent RNA helicase DDX5, 3.6.4.13, DEAD box protein 5, RNA helicase p68	1.08928	0.652701		P28288	ABCD3	ATP-binding cassette sub-family D member 3, 3.1.2.-, 7.6.2.-, 70 kDa peroxisomal membrane protein, PMP70	0.494839	-1.93454
Q96QC0	PPP1R10	Serine/threonine-protein phosphatase 1 regulatory subunit 10, MHC class I region proline-rich protein CAT53, PP1-binding protein of 114 kDa, Phosphatase 1 nuclear targeting subunit, Protein FB19, p99	1.61686	0.84024		Q14674	ESPL1	Separin, 3.4.22.49, Caspase-like protein ESPL1, Extra spindle poles-like 1 protein, Separase	0.495275	0.0381335
Q9ULW3	ABT1	Activator of basal transcription 1, hABT1, Basal transcriptional activator	1.9797	0.478474		P06493	CDK1	Cyclin-dependent kinase 1, CDK1, 2.7.11.22, 2.7.11.23, Cell division control protein 2 homolog, Cell division protein kinase 1, p34 protein kinase	0.299821	-1.70217
P08708	RPS17	40S ribosomal protein S17, Small ribosomal subunit protein eS17	1.40888	-0.35491		Q5SW79	CEP170	Centrosomal protein of 170 kDa, Cep170, KARP-1-binding protein, KARP1-binding protein	1.16783	-0.824248
Q99848	EBNA1BP2	Probable rRNA-processing protein EBP2, EBNA1-binding protein 2, Nucleolar protein p40	1.36432	0.306633		O14578	CIT	Citron Rho-interacting kinase, CRIK, 2.7.11.1, Serine/threonine-protein kinase 21	0.317319	0.719413
P39023	RPL3	60S ribosomal protein L3, HIV-1 TAR RNA-binding protein B, TARBP-B, Large ribosomal subunit protein uL3	1.22125	-0.149362		Q9C0D5	TANC1	Protein TANC1, Tetratricopeptide repeat, ankyrin repeat and coiled-coil domain-containing protein 1	0.349089	-0.0596748
Q9UN86	G3BP2	Ras GTPase-activating protein-binding protein 2, G3BP-2, GAP SH3 domain-binding protein 2	1.40321	0.418481		Q14008	CKAP5	Cytoskeleton-associated protein 5, Colonic and hepatic tumor overexpressed gene protein, Ch-TOG	0.26178	-0.706463
P62263	RPS14	40S ribosomal protein S14, Small ribosomal subunit protein uS11	1.32825	-0.271965		Q13200	PSMD2	26S proteasome non-ATPase regulatory subunit 2, 26S proteasome regulatory subunit RPN1, 26S proteasome regulatory subunit S2, 26S proteasome subunit p97, Protein 55.11, Tumor necrosis factor type 1 receptor-associated protein 2	0.274086	-1.52436
Q12905	ILF2	Interleukin enhancer-binding factor 2, Nuclear factor of activated T-cells 45 kDa	1.42851	0.178263		P24752	ACAT1	Acetyl-CoA acetyltransferase, mitochondrial, 2.3.1.9, Acetoacetyl-CoA thiolase, T2	0.291856	-1.41275
Q9BUJ2	HNRNPUL1	Heterogeneous nuclear ribonucleoprotein U-like protein 1, Adenovirus early region 1B-associated protein 5, E1B-55 kDa-associated protein 5, E1B-AP5	1.27669	0.282305		P33981	TTK	Dual specificity protein kinase TTK, 2.7.12.1, Phosphotyrosine picked threonine-protein kinase, PYT	0.381517	-0.0930974
Q13242	SRSF9	Serine/arginine-rich splicing factor 9, Pre-mRNA-splicing factor SRp30C, Splicing factor, arginine/serine-rich 9	1.44423	0.612653		P00367	GLUD1	Glutamate dehydrogenase 1, mitochondrial, GDH 1, 1.4.1.3	0.244392	-1.40124
P62241	RPS8	40S ribosomal protein S8, Small ribosomal subunit protein eS8	1.32989	-0.476201		Q8WYP5	AHCTF1	Protein ELYS, Embryonic large molecule derived from yolk sac, Protein MEL-28, Putative AT-hook-containing transcription factor 1	0.327374	-1.34697
Q86UE4	MTDH	Protein LYRIC, 3D3/LYRIC, Astrocyte elevated gene-1 protein, AEG-1, Lysine-rich CEACAM1 co-isolated protein, Metadherin, Metastasis adhesion protein	1.67869	0.095666		Q8IWC1	MAP7D3	MAP7 domain-containing protein 3	0.520144	-0.68256
Q9BQG0	MYBBP1A	Myb-binding protein 1A	1.22927	0.287587		Q12800	TFCP2	Alpha-globin transcription factor CP2, SAA3 enhancer factor, Transcription factor LSF	0.443076	-1.09421
O43865	AHCYL1	S-adenosylhomocysteine hydrolase-like protein 1, DC-expressed AHCY-like molecule, IP(3)Rs binding protein released with IP(3), IRBIT, Putative adenosylhomocysteinase 2, S-adenosyl-L-homocysteine hydrolase 2, AdoHcyase 2	1.25366	-0.748447		P0CW18	PRSS56	Serine protease 56, 3.4.21.-	0.205335	-1.06493
Q12926	ELAVL2	ELAV-like protein 2, ELAV-like neuronal protein 1, Hu-antigen B, HuB, Nervous system-specific RNA-binding protein Hel-N1	1.35684	0.608032		Q9BT17	MTG1	Mitochondrial ribosome-associated GTPase 1, GTP-binding protein 7, Mitochondrial GTPase 1	0.393712	-0.186342
P14678	SNRPB	Small nuclear ribonucleoprotein-associated proteins B and B', snRNP-B, Sm protein B/B', Sm-B/B', SmB/B'	1.44775	-0.0242727		P10515	DLAT	Dihydrolipoyllysine-residue acetyltransferase component of pyruvate dehydrogenase complex, mitochondrial, 2.3.1.12, 70 kDa mitochondrial autoantigen of primary biliary cirrhosis, PBC, Dihydrolipoamide acetyltransferase component of pyruvate dehydrogenase complex, M2 antigen complex 70 kDa subunit, Pyruvate dehydrogenase complex component E2, PDC-E2, PDCE2	0.208384	-0.850431
Q13247	SRSF6	Serine/arginine-rich splicing factor 6, Pre-mRNA-splicing factor SRP55, Splicing factor, arginine/serine-rich 6	1.1297	0.465147		Q86TU7	SETD3	Actin-histidine N-methyltransferase, 2.1.1.85, Protein-L-histidine N-tele-methyltransferase, SET domain-containing protein 3, hSETD3	0.685285	-1.24932
Q13823	GNL2	Nucleolar GTP-binding protein 2, Autoantigen NGP-1	1.3032	0.671379		Q9UDY2	TJP2	Tight junction protein ZO-2, Tight junction protein 2, Zona occludens protein 2, Zonula occludens protein 2	0.266944	-1.11434
P09012	SNRPA	U1 small nuclear ribonucleoprotein A, U1 snRNP A, U1-A, U1A	1.70632	-0.34904		Q9Y3B9	RRP15	RRP15-like protein, Ribosomal RNA-processing protein 15	0.1636	-0.532897
Q92900	UPF1	Regulator of nonsense transcripts 1, 3.6.4.12, 3.6.4.13, ATP-dependent helicase RENT1, Nonsense mRNA reducing factor 1, NORF1, Up-frameshift suppressor 1 homolog, hUpf1	1.19765	0.62185		Q6P2E9	EDC4	Enhancer of mRNA-decapping protein 4, Autoantigen Ge-1, Autoantigen RCD-8, Human enhancer of decapping large subunit, Hedls	0.353421	-1.37921
Q9NV06	DCAF13	DDB1- and CUL4-associated factor 13, WD repeat and SOF domain-containing protein 1	1.49043	0.723073		Q9HD20	ATP13A1	Endoplasmic reticulum transmembrane helix translocase, 7.4.2.-, Endoplasmic reticulum P5A-ATPase	0.294719	-0.879045
Q9NY93	DDX56	Probable ATP-dependent RNA helicase DDX56, 3.6.4.13, ATP-dependent 61 kDa nucleolar RNA helicase, DEAD box protein 21, DEAD box protein 56	1.3988	0.78978		O60333	KIF1B	Kinesin-like protein KIF1B, Klp	0.340964	0.118496
Q02878	RPL6	60S ribosomal protein L6, Large ribosomal subunit protein eL6, Neoplasm-related protein C140, Tax-responsive enhancer element-binding protein 107, TaxREB107	1.22329	-0.26555		O95299	NDUFA10	NADH dehydrogenase [ubiquinone] 1 alpha subcomplex subunit 10, mitochondrial, Complex I-42kD, CI-42kD, NADH-ubiquinone oxidoreductase 42 kDa subunit	0.35115	-1.21582
P62888	RPL30	60S ribosomal protein L30, Large ribosomal subunit protein eL30	1.34114	-0.385213		Q6P1N0	CC2D1A	Coiled-coil and C2 domain-containing protein 1A, Akt kinase-interacting protein 1, Five prime repressor element under dual repression-binding protein 1, FRE under dual repression-binding protein 1, Freud-1, Putative NF-kappa-B-activating protein 023N	0.401974	-0.593117
O75179	ANKRD17	Ankyrin repeat domain-containing protein 17, Gene trap ankyrin repeat protein, Serologically defined breast cancer antigen NY-BR-16	1.43862	0.892302		Q8WXH0	SYNE2	Nesprin-2, KASH domain-containing protein 2, KASH2, Nuclear envelope spectrin repeat protein 2, Nucleus and actin connecting element protein, Protein NUANCE, Synaptic nuclear envelope protein 2, Syne-2	0.158929	0.161778
Q8NDT2	RBM15B	Putative RNA-binding protein 15B, One-twenty two protein 3, HsOTT3, HuOTT3, RNA-binding motif protein 15B	1.46308	1.37013		O60566	BUB1B	Mitotic checkpoint serine/threonine-protein kinase BUB1 beta, 2.7.11.1, MAD3/BUB1-related protein kinase, hBUBR1, Mitotic checkpoint kinase MAD3L, Protein SSK1	0.297628	-0.670359
P27816	MAP4	Microtubule-associated protein 4, MAP-4	1.13903	0.369753		O14802	POLR3A	DNA-directed RNA polymerase III subunit RPC1, RNA polymerase III subunit C1, 2.7.7.6, DNA-directed RNA polymerase III largest subunit, DNA-directed RNA polymerase III subunit A, RNA polymerase III 155 kDa subunit, RPC155, RNA polymerase III subunit C160	0.257277	-0.263096
Q6P2Q9	PRPF8	Pre-mRNA-processing-splicing factor 8, 220 kDa U5 snRNP-specific protein, PRP8 homolog, Splicing factor Prp8, p220	1.12093	0.412968		Q9NZM1	MYOF	Myoferlin, Fer-1-like protein 3	0.135911	-1.1357
P62633	CNBP	CCHC-type zinc finger nucleic acid binding protein, Cellular nucleic acid-binding protein, CNBP, Zinc finger protein 9	1.311	0.363411		Q6P1X5	TAF2	Transcription initiation factor TFIID subunit 2, 150 kDa cofactor of initiator function, RNA polymerase II TBP-associated factor subunit B, TBP-associated factor 150 kDa, Transcription initiation factor TFIID 150 kDa subunit, TAF(II)150, TAFII-150, TAFII150	0.399366	-0.294323
O95758	PTBP3	Polypyrimidine tract-binding protein 3, Regulator of differentiation 1, Rod1	1.27706	1.24257		Q53EZ4	CEP55	Centrosomal protein of 55 kDa, Cep55, Up-regulated in colon cancer 6	0.428958	-0.567881
Q8TED0	UTP15	U3 small nucleolar RNA-associated protein 15 homolog	1.30396	0.717945		Q92621	NUP205	Nuclear pore complex protein Nup205, 205 kDa nucleoporin, Nucleoporin Nup205	0.189455	-1.37539
P26368	U2AF2	Splicing factor U2AF 65 kDa subunit, U2 auxiliary factor 65 kDa subunit, hU2AF(65), hU2AF65, U2 snRNP auxiliary factor large subunit	1.12994	0.796957		P52701	MSH6	DNA mismatch repair protein Msh6, hMSH6, G/T mismatch-binding protein, GTBP, GTMBP, MutS protein homolog 6, MutS-alpha 160 kDa subunit, p160	0.157052	-1.23382
Q6DKI1	RPL7L1	60S ribosomal protein L7-like 1, Large ribosomal subunit protein uL30-like 1	1.41639	0.275203		Q4G0N4	NADK2	NAD kinase 2, mitochondrial, 2.7.1.23, Mitochondrial NAD kinase, NAD kinase domain-containing protein 1, mitochondrial	0.174307	-0.86549
P36578	RPL4	60S ribosomal protein L4, 60S ribosomal protein L1, Large ribosomal subunit protein uL4	0.939903	0.501429		P11310	ACADM	Medium-chain specific acyl-CoA dehydrogenase, mitochondrial, 1.3.8.7	0.158117	-1.46719
P46776	RPL27A	60S ribosomal protein L27a, Large ribosomal subunit protein uL15	1.34341	-0.309396		Q8N3U4	STAG2	Cohesin subunit SA-2, SCC3 homolog 2, Stromal antigen 2	0.432523	-1.98966
Q8TDN6	BRIX1	Ribosome biogenesis protein BRX1 homolog, Brix domain-containing protein 2	1.33697	-0.111102		Q9ULT8	HECTD1	E3 ubiquitin-protein ligase HECTD1, 2.3.2.26, E3 ligase for inhibin receptor, EULIR, HECT domain-containing protein 1	0.208499	-1.14264
Q14690	PDCD11	Protein RRP5 homolog, NF-kappa-B-binding protein, NFBP, Programmed cell death protein 11	1.13257	0.651272		P21359	NF1	Neurofibromin, Neurofibromatosis-related protein NF-1	0.558848	-0.735774
P62424	RPL7A	60S ribosomal protein L7a, Large ribosomal subunit protein eL8, PLA-X polypeptide, Surfeit locus protein 3	1.26574	-0.686764		P27144	AK4	Adenylate kinase 4, mitochondrial, AK 4, 2.7.4.10, 2.7.4.6, Adenylate kinase 3-like, GTP:AMP phosphotransferase AK4	0.337763	-1.90527
Q8WWM7	ATXN2L	Ataxin-2-like protein, Ataxin-2 domain protein, Ataxin-2-related protein	1.42423	0.4937		Q12965	MYO1E	Unconventional myosin-Ie, Myosin-Ic, Unconventional myosin 1E	0.143047	-1.36688
Q14152	EIF3A	Eukaryotic translation initiation factor 3 subunit A, eIF3a, Eukaryotic translation initiation factor 3 subunit 10, eIF-3-theta, eIF3 p167, eIF3 p180, eIF3 p185	1.01176	0.519576		P11177	PDHB	Pyruvate dehydrogenase E1 component subunit beta, mitochondrial, PDHE1-B, 1.2.4.1	0.189087	-1.38638
Q5BKZ1	ZNF326	DBIRD complex subunit ZNF326, Zinc finger protein 326, Zinc finger protein interacting with mRNPs and DBC1	1.21966	0.568749		P08559	PDHA1	Pyruvate dehydrogenase E1 component subunit alpha, somatic form, mitochondrial, 1.2.4.1, PDHE1-A type I	0.146769	-1.38148
Q9Y520	PRRC2C	Protein PRRC2C, BAT2 domain-containing protein 1, HBV X-transactivated gene 2 protein, HBV XAg-transactivated protein 2, HLA-B-associated transcript 2-like 2, Proline-rich and coiled-coil-containing protein 2C	1.15464	0.840898		P05023	ATP1A1	Sodium/potassium-transporting ATPase subunit alpha-1, Na(+)/K(+) ATPase alpha-1 subunit, 7.2.2.13, Sodium pump subunit alpha-1	0.107134	-1.68349
Q9GZT3	SLIRP	SRA stem-loop-interacting RNA-binding protein, mitochondrial	1.24092	0.382156		P13804	ETFA	Electron transfer flavoprotein subunit alpha, mitochondrial, Alpha-ETF	0.182677	-1.83961
Q9UQ80	PA2G4	Proliferation-associated protein 2G4, Cell cycle protein p38-2G4 homolog, hG4-1, ErbB3-binding protein 1	1.05206	0.223416		Q86TC9	MYPN	Myopalladin, 145 kDa sarcomeric protein	0.175833	-0.963207
Q15427	SF3B4	Splicing factor 3B subunit 4, Pre-mRNA-splicing factor SF3b 49 kDa subunit, Spliceosome-associated protein 49, SAP 49	1.48522	0.969541		Q9P265	DIP2B	Disco-interacting protein 2 homolog B, DIP2 homolog B	0.167235	-1.15458
Q14671	PUM1	Pumilio homolog 1, HsPUM, Pumilio-1	1.10684	1.30391		Q9P2J5	LARS1	Leucine--tRNA ligase, cytoplasmic, 6.1.1.4, Leucyl-tRNA synthetase, LeuRS	0.104154	-1.42468
P51116	FXR2	RNA-binding protein FXR2, FXR2P, FMR1 autosomal homolog 2	1.46972	0.569439		Q03001	DST	Dystonin, 230 kDa bullous pemphigoid antigen, 230/240 kDa bullous pemphigoid antigen, Bullous pemphigoid antigen 1, BPA, Bullous pemphigoid antigen, Dystonia musculorum protein, Hemidesmosomal plaque protein	0.147269	-0.361233
Q9BX40	LSM14B	Protein LSM14 homolog B, RNA-associated protein 55B, hRAP55B	2.26613	0.413111		Q99798	ACO2	Aconitate hydratase, mitochondrial, Aconitase, 4.2.1.3, Citrate hydro-lyase	0.110316	-1.21459
P11387	TOP1	DNA topoisomerase 1, 5.6.2.1, DNA topoisomerase I	1.4063	-0.136538		Q96I59	NARS2	Probable asparagine--tRNA ligase, mitochondrial, 6.1.1.22, Asparaginyl-tRNA synthetase, AsnRS	0.226119	-0.888742
Q8IY67	RAVER1	Ribonucleoprotein PTB-binding 1, Protein raver-1	1.32946	1.05313		P31040	SDHA	Succinate dehydrogenase [ubiquinone] flavoprotein subunit, mitochondrial, 1.3.5.1, Flavoprotein subunit of complex II, Fp	0.116693	-1.53413
P46782	RPS5	40S ribosomal protein S5, Small ribosomal subunit protein uS7	1.22211	-0.273875		Q8WUM0	NUP133	Nuclear pore complex protein Nup133, 133 kDa nucleoporin, Nucleoporin Nup133	0.112696	-1.0868
Q9NZI8	IGF2BP1	Insulin-like growth factor 2 mRNA-binding protein 1, IGF2 mRNA-binding protein 1, IMP-1, IMP1, Coding region determinant-binding protein, CRD-BP, IGF-II mRNA-binding protein 1, VICKZ family member 1, Zipcode-binding protein 1, ZBP-1	1.04454	0.853034		P26640	VARS1	Valine--tRNA ligase, 6.1.1.9, Protein G7a, Valyl-tRNA synthetase, ValRS	0.0676707	-1.01838
Q00341	HDLBP	Vigilin, High density lipoprotein-binding protein, HDL-binding protein	1.06393	0.52681		O95373	IPO7	Importin-7, Imp7, Ran-binding protein 7, RanBP7	0.0656038	-1.00736
Q8IX01	SUGP2	SURP and G-patch domain-containing protein 2, Arginine/serine-rich-splicing factor 14, Splicing factor, arginine/serine-rich 14	1.30896	0.673874		Q6RFH5	WDR74	WD repeat-containing protein 74, NOP seven-associated protein 1	0.135079	-0.959398
Q9BVJ6	UTP14A	U3 small nucleolar RNA-associated protein 14 homolog A, Antigen NY-CO-16, Serologically defined colon cancer antigen 16	1.22015	0.66639		O15357	INPPL1	Phosphatidylinositol 3,4,5-trisphosphate 5-phosphatase 2, 3.1.3.86, Inositol polyphosphate phosphatase-like protein 1, INPPL-1, Protein 51C, SH2 domain-containing inositol 5'-phosphatase 2, SH2 domain-containing inositol phosphatase 2, SHIP-2	0.0899864	-0.249462
Q14692	BMS1	Ribosome biogenesis protein BMS1 homolog, Ribosome assembly protein BMS1 homolog	1.09284	0.893705		Q92878	RAD50	DNA repair protein RAD50, hRAD50, 3.6.-.-	0.0959588	-1.4168
Q96E39	RBMXL1	RNA binding motif protein, X-linked-like-1, Heterogeneous nuclear ribonucleoprotein G-like 1	1.3609	0.812525		P11021	HSPA5	Endoplasmic reticulum chaperone BiP, 3.6.4.10, 78 kDa glucose-regulated protein, GRP-78, Binding-immunoglobulin protein, BiP, Heat shock protein 70 family protein 5, HSP70 family protein 5, Heat shock protein family A member 5, Immunoglobulin heavy chain-binding protein	0.0512291	-1.7069
Q52LJ0	FAM98B	Protein FAM98B	1.66614	0.207276		P31930	UQCRC1	Cytochrome b-c1 complex subunit 1, mitochondrial, Complex III subunit 1, Core protein I, Ubiquinol-cytochrome-c reductase complex core protein 1	0.0678647	-1.08449
Q9UGR2	ZC3H7B	Zinc finger CCCH domain-containing protein 7B, Rotavirus 'X'-associated non-structural protein, RoXaN	1.32959	0.878415		P49748	ACADVL	Very long-chain specific acyl-CoA dehydrogenase, mitochondrial, VLCAD, 1.3.8.9	0.0841044	-1.69044
P46778	RPL21	60S ribosomal protein L21, Large ribosomal subunit protein eL21	1.30876	-0.508198		Q13501	SQSTM1	Sequestosome-1, EBI3-associated protein of 60 kDa, EBIAP, p60, Phosphotyrosine-independent ligand for the Lck SH2 domain of 62 kDa, Ubiquitin-binding protein p62	0.0738371	-1.24629
Q9UHX1	PUF60	Poly(U)-binding-splicing factor PUF60, 60 kDa poly(U)-binding-splicing factor, FUSE-binding protein-interacting repressor, FBP-interacting repressor, Ro-binding protein 1, RoBP1, Siah-binding protein 1, Siah-BP1	1.15158	0.593771		Q96KG9	SCYL1	N-terminal kinase-like protein, Coated vesicle-associated kinase of 90 kDa, SCY1-like protein 1, Telomerase regulation-associated protein, Telomerase transcriptional element-interacting factor, Teratoma-associated tyrosine kinase	0.0991449	-0.942251
Q8IXT5	RBM12B	RNA-binding protein 12B, RNA-binding motif protein 12B	1.33303	1.23855		Q9Y399	MRPS2	28S ribosomal protein S2, mitochondrial, MRP-S2, S2mt, Mitochondrial small ribosomal subunit protein uS2m	0.0851896	-0.999626
O60832	DKC1	H/ACA ribonucleoprotein complex subunit DKC1, 5.4.99.-, CBF5 homolog, Dyskerin, Nopp140-associated protein of 57 kDa, Nucleolar protein NAP57, Nucleolar protein family A member 4, snoRNP protein DKC1	1.20329	0.282601		P23258	TUBG1	Tubulin gamma-1 chain, Gamma-1-tubulin, Gamma-tubulin complex component 1, GCP-1	0.0820884	-1.26818
Q16629	SRSF7	Serine/arginine-rich splicing factor 7, Splicing factor 9G8, Splicing factor, arginine/serine-rich 7	0.97242	0.69195		Q9NZN5	ARHGEF12	Rho guanine nucleotide exchange factor 12, Leukemia-associated RhoGEF	0.206624	-0.474997
P67809	YBX1	Y-box-binding protein 1, YB-1, CCAAT-binding transcription factor I subunit A, CBF-A, DNA-binding protein B, DBPB, Enhancer factor I subunit A, EFI-A, Nuclease-sensitive element-binding protein 1, Y-box transcription factor	0.915191	0.884454		P38117	ETFB	Electron transfer flavoprotein subunit beta, Beta-ETF	0.102692	-2.0479
P27635	RPL10	60S ribosomal protein L10, Laminin receptor homolog, Large ribosomal subunit protein uL16, Protein QM, Ribosomal protein L10, Tumor suppressor QM	1.18995	-0.449731		Q7Z4H7	HAUS6	HAUS augmin-like complex subunit 6	0.271101	-0.571356
P30086	PEBP1	Phosphatidylethanolamine-binding protein 1, PEBP-1, HCNPpp, Neuropolypeptide h3, Prostatic-binding protein, Raf kinase inhibitor protein, RKIP	1.39508	-0.432995		O75663	TIPRL	TIP41-like protein, Putative MAPK-activating protein PM10, Type 2A-interacting protein, TIP	0.292155	-1.39951
Q9NW64	RBM22	Pre-mRNA-splicing factor RBM22, RNA-binding motif protein 22, Zinc finger CCCH domain-containing protein 16	1.23243	0.814096		P50416	CPT1A	Carnitine O-palmitoyltransferase 1, liver isoform, CPT1-L, 2.3.1.21, Carnitine O-palmitoyltransferase I, liver isoform, CPT I, CPTI-L, Carnitine palmitoyltransferase 1A	0.0556672	-1.46876
Q9NY12	GAR1	H/ACA ribonucleoprotein complex subunit 1, Nucleolar protein family A member 1, snoRNP protein GAR1	1.31526	0.697511		O15091	PRORP	Mitochondrial ribonuclease P catalytic subunit, 3.1.26.5, Mitochondrial ribonuclease P protein 3, Mitochondrial RNase P protein 3, Protein only RNase P catalytic subunit	0.145236	-0.354816
Q9NZB2	FAM120A	Constitutive coactivator of PPAR-gamma-like protein 1, Oxidative stress-associated Src activator, Protein FAM120A	1.00998	0.884745		Q9H3S7	PTPN23	Tyrosine-protein phosphatase non-receptor type 23, 3.1.3.48, His domain-containing protein tyrosine phosphatase, HD-PTP, Protein tyrosine phosphatase TD14, PTP-TD14	0.147697	-0.930177
Q08170	SRSF4	Serine/arginine-rich splicing factor 4, Pre-mRNA-splicing factor SRP75, SRP001LB, Splicing factor, arginine/serine-rich 4	1.38409	0.657964		Q5VYK3	ECPAS	Proteasome adapter and scaffold protein ECM29, Ecm29 proteasome adapter and scaffold, Proteasome-associated protein ECM29 homolog	0.0406389	-1.2932
Q6P5R6	RPL22L1	60S ribosomal protein L22-like 1, Large ribosomal subunit protein eL22-like 1	1.3412	0.673411		Q9Y697	NFS1	Cysteine desulfurase, 2.8.1.7	0.0796298	-1.50868
Q8ND56	LSM14A	Protein LSM14 homolog A, Protein FAM61A, Protein SCD6 homolog, Putative alpha-synuclein-binding protein, AlphaSNBP, RNA-associated protein 55A, hRAP55, hRAP55A	1.39279	0.765601		P42226	STAT6	Signal transducer and activator of transcription 6, IL-4 Stat	0.0869121	-1.23362
P61247	RPS3A	40S ribosomal protein S3a, Small ribosomal subunit protein eS1, v-fos transformation effector protein, Fte-1	1.03246	-0.315676		O95573	ACSL3	Fatty acid CoA ligase Acsl3, Arachidonate--CoA ligase, 6.2.1.15, Long-chain acyl-CoA synthetase 3, LACS 3, Long-chain-fatty-acid--CoA ligase 3, 6.2.1.3, Medium-chain acyl-CoA ligase Acsl3, 6.2.1.2	0.0529085	-1.86566
O00541	PES1	Pescadillo homolog	1.21994	-0.0795251		Q15031	LARS2	Leucine--tRNA ligase, mitochondrial, 6.1.1.4, Leucyl-tRNA synthetase, LeuRS	0.0693865	-1.43524
P42704	LRPPRC	Leucine-rich PPR motif-containing protein, mitochondrial, 130 kDa leucine-rich protein, LRP 130, GP130	0.840664	0.821831		Q15437	SEC23B	Protein transport protein Sec23B, hSec23B, SEC23-related protein B	0.0864126	-1.97711
Q12849	GRSF1	G-rich sequence factor 1, GRSF-1	1.03587	0.940326		O15230	LAMA5	Laminin subunit alpha-5, Laminin-10 subunit alpha, Laminin-11 subunit alpha, Laminin-15 subunit alpha	0.0410999	0.124636
Q13573	SNW1	SNW domain-containing protein 1, Nuclear protein SkiP, Nuclear receptor coactivator NCoA-62, Ski-interacting protein	2.04273	-0.354368		P57678	GEMIN4	Gem-associated protein 4, Gemin-4, Component of gems 4, p97	0.0520037	-1.62971
Q9NX24	NHP2	H/ACA ribonucleoprotein complex subunit 2, Nucleolar protein family A member 2, snoRNP protein NHP2	1.45314	0.24028		P46940	IQGAP1	Ras GTPase-activating-like protein IQGAP1, p195	0.0218726	-1.6449
Q76FK4	NOL8	Nucleolar protein 8, Nucleolar protein Nop132	1.64632	0.399611		Q93008	USP9X	Probable ubiquitin carboxyl-terminal hydrolase FAF-X, 3.4.19.12, Deubiquitinating enzyme FAF-X, Fat facets in mammals, hFAM, Fat facets protein-related, X-linked, Ubiquitin thioesterase FAF-X, Ubiquitin-specific protease 9, X chromosome, Ubiquitin-specific-processing protease FAF-X	0.0327958	-1.35406
Q9NWH9	SLTM	SAFB-like transcription modulator, Modulator of estrogen-induced transcription	1.32454	0.361736		O94979	SEC31A	Protein transport protein Sec31A, ABP125, ABP130, SEC31-like protein 1, SEC31-related protein A, Web1-like protein	0.027186	-1.75719
Q9H8H0	NOL11	Nucleolar protein 11	1.40621	0.175027		P11717	IGF2R	Cation-independent mannose-6-phosphate receptor, CI Man-6-P receptor, CI-MPR, M6PR, 300 kDa mannose 6-phosphate receptor, MPR 300, Insulin-like growth factor 2 receptor, Insulin-like growth factor II receptor, IGF-II receptor, M6P/IGF2 receptor, M6P/IGF2R, CD222	0.0250676	-0.958536
P22087	FBL	rRNA 2'-O-methyltransferase fibrillarin, 2.1.1.-, 34 kDa nucleolar scleroderma antigen, Histone-glutamine methyltransferase, U6 snRNA 2'-O-methyltransferase fibrillarin	1.04549	0.355868		Q6UB35	MTHFD1L	Monofunctional C1-tetrahydrofolate synthase, mitochondrial, 6.3.4.3, Formyltetrahydrofolate synthetase	0.0280156	-1.57338
Q9NVN8	GNL3L	Guanine nucleotide-binding protein-like 3-like protein	1.11538	1.07948		Q14C86	GAPVD1	GTPase-activating protein and VPS9 domain-containing protein 1, GAPex-5, Rab5-activating protein 6	0.0291047	-1.75468
P33240	CSTF2	Cleavage stimulation factor subunit 2, CF-1 64 kDa subunit, Cleavage stimulation factor 64 kDa subunit, CSTF 64 kDa subunit, CstF-64	1.15092	1.00158		P00533	EGFR	Epidermal growth factor receptor, 2.7.10.1, Proto-oncogene c-ErbB-1, Receptor tyrosine-protein kinase erbB-1	0.0157235	-0.798329
Q9GZR7	DDX24	ATP-dependent RNA helicase DDX24, 3.6.4.13, DEAD box protein 24	1.27804	0.354046		O15344	MID1	E3 ubiquitin-protein ligase Midline-1, 2.3.2.27, Midin, Putative transcription factor XPRF, RING finger protein 59, RING finger protein Midline-1, RING-type E3 ubiquitin transferase Midline-1, Tripartite motif-containing protein 18	0.0609799	-1.20885
Q6PKG0	LARP1	La-related protein 1, La ribonucleoprotein domain family member 1	1.0718	0.557645		O95239	KIF4A	Chromosome-associated kinesin KIF4A, Chromokinesin-A	0.0217492	-1.23928
Q07020	RPL18	60S ribosomal protein L18, Large ribosomal subunit protein eL18	1.31849	-0.828336		P82930	MRPS34	28S ribosomal protein S34, mitochondrial, MRP-S34, S34mt, Mitochondrial small ribosomal subunit protein mS34	0.0138036	-1.50087
Q9Y5J1	UTP18	U3 small nucleolar RNA-associated protein 18 homolog, WD repeat-containing protein 50	1.34757	0.0812856		Q9NZJ4	SACS	Sacsin, DnaJ homolog subfamily C member 29, DNAJC29	0.0688946	-2.01642
Q9NVS2	MRPS18A	39S ribosomal protein S18a, mitochondrial, MRP-S18-a, Mrps18a, S18mt-a, 39S ribosomal protein S18-3, mitochondrial, MRP-S18-3, Mitochondrial large ribosomal subunit protein bS18a, Mitochondrial large ribosomal subunit protein mL66	1.14304	0.928103		P31327	CPS1	Carbamoyl-phosphate synthase [ammonia], mitochondrial, 6.3.4.16, Carbamoyl-phosphate synthetase I, CPSase I	0.00557974	-1.31784
P48634	PRRC2A	Protein PRRC2A, HLA-B-associated transcript 2, Large proline-rich protein BAT2, Proline-rich and coiled-coil-containing protein 2A, Protein G2	1.10631	0.850312		P40938	RFC3	Replication factor C subunit 3, Activator 1 38 kDa subunit, A1 38 kDa subunit, Activator 1 subunit 3, Replication factor C 38 kDa subunit, RF-C 38 kDa subunit, RFC38	0.0483592	-2.1676
P78332	RBM6	RNA-binding protein 6, Lung cancer antigen NY-LU-12, Protein G16, RNA-binding motif protein 6, RNA-binding protein DEF-3	1.23367	1.03885		Q8TBB5	KLHDC4	Kelch domain-containing protein 4	0.00633413	-0.280217
O60869	EDF1	Endothelial differentiation-related factor 1, EDF-1, Multiprotein-bridging factor 1, MBF1	1.27025	-0.216009		Q8WWK9	CKAP2	Cytoskeleton-associated protein 2, CTCL tumor antigen se20-10, Tumor- and microtubule-associated protein	0.0065794	-0.278716
Q86U42	PABPN1	Polyadenylate-binding protein 2, PABP-2, Poly(A)-binding protein 2, Nuclear poly(A)-binding protein 1, Poly(A)-binding protein II, PABII, Polyadenylate-binding nuclear protein 1	1.45219	0.266575		O00116	AGPS	Alkyldihydroxyacetonephosphate synthase, peroxisomal, Alkyl-DHAP synthase, 2.5.1.26, Aging-associated gene 5 protein, Alkylglycerone-phosphate synthase	0.353644	-2.65175
Q86W50	METTL16	RNA N6-adenosine-methyltransferase METTL16, Methyltransferase 10 domain-containing protein, Methyltransferase-like protein 16, N6-adenosine-methyltransferase METTL16, 2.1.1.348, U6 small nuclear RNA (adenine-(43)-N(6))-methyltransferase, 2.1.1.346	1.42124	0.745594		P11498	PC	Pyruvate carboxylase, mitochondrial, 6.4.1.1, Pyruvic carboxylase, PCB	-0.00684504	-1.9178
P41214	EIF2D	Eukaryotic translation initiation factor 2D, eIF2d, Hepatocellular carcinoma-associated antigen 56, Ligatin	1.60219	0.542578		Q00653	NFKB2	Nuclear factor NF-kappa-B p100 subunit, DNA-binding factor KBF2, H2TF1, Lymphocyte translocation chromosome 10 protein, Nuclear factor of kappa light polypeptide gene enhancer in B-cells 2, Oncogene Lyt-10, Lyt10	-0.011016	-1.09858
Q03701	CEBPZ	CCAAT/enhancer-binding protein zeta, CCAAT-box-binding transcription factor, CBF, CCAAT-binding factor	1.2065	0.42633		P16435	POR	NADPH--cytochrome P450 reductase, CPR, P450R, 1.6.2.4	-0.00957254	-1.5148
Q9NZM5	NOP53	Ribosome biogenesis protein NOP53, Glioma tumor suppressor candidate region gene 2 protein, Protein interacting with carboxyl terminus 1, PICT-1, p60	1.42847	0.186892		Q00325	SLC25A3	Phosphate carrier protein, mitochondrial, Phosphate transport protein, PTP, Solute carrier family 25 member 3	-0.0144188	-2.16716
Q7Z2W4	ZC3HAV1	Zinc finger CCCH-type antiviral protein 1, ADP-ribosyltransferase diphtheria toxin-like 13, ARTD13, Inactive Poly [ADP-ribose] polymerase 13, PARP13, Zinc finger CCCH domain-containing protein 2, Zinc finger antiviral protein, ZAP	0.959953	0.815811		P25391	LAMA1	Laminin subunit alpha-1, Laminin A chain, Laminin-1 subunit alpha, Laminin-3 subunit alpha, S-laminin subunit alpha, S-LAM alpha	-0.0178286	-0.38078
P62308	SNRPG	Small nuclear ribonucleoprotein G, snRNP-G, Sm protein G, Sm-G, SmG	1.38478	0.585592		Q9BPX3	NCAPG	Condensin complex subunit 3, Chromosome-associated protein G, Condensin subunit CAP-G, hCAP-G, Melanoma antigen NY-MEL-3, Non-SMC condensin I complex subunit G, XCAP-G homolog	-0.0373774	-1.81943
P42766	RPL35	60S ribosomal protein L35, Large ribosomal subunit protein uL29	1.43096	-0.968382		Q96AC1	FERMT2	Fermitin family homolog 2, Kindlin-2, Mitogen-inducible gene 2 protein, MIG-2, Pleckstrin homology domain-containing family C member 1, PH domain-containing family C member 1	-0.0181426	-0.343325
P62266	RPS23	40S ribosomal protein S23, Small ribosomal subunit protein uS12	1.31292	-0.587409		Q9H0H5	RACGAP1	Rac GTPase-activating protein 1, Male germ cell RacGap, MgcRacGAP, Protein CYK4 homolog, CYK4, HsCYK-4	-0.0223797	-0.0524092
Q07065	CKAP4	Cytoskeleton-associated protein 4, 63-kDa cytoskeleton-linking membrane protein, Climp-63, p63	1.23722	0.249421		Q9H9A6	LRRC40	Leucine-rich repeat-containing protein 40	-0.0303596	-0.690407
O43251	RBFOX2	RNA binding protein fox-1 homolog 2, Fox-1 homolog B, Hexaribonucleotide-binding protein 2, RNA-binding motif protein 9, RNA-binding protein 9, Repressor of tamoxifen transcriptional activity	1.19828	0.81035		P49915	GMPS	GMP synthase [glutamine-hydrolyzing], 6.3.5.2, GMP synthetase, Glutamine amidotransferase	-0.0233607	-0.557576
Q12874	SF3A3	Splicing factor 3A subunit 3, SF3a60, Spliceosome-associated protein 61, SAP 61	1.26315	0.0732042		Q8WUM4	PDCD6IP	Programmed cell death 6-interacting protein, PDCD6-interacting protein, ALG-2-interacting protein 1, ALG-2-interacting protein X, Hp95	-0.0446438	-1.944
P52756	RBM5	RNA-binding protein 5, Protein G15, Putative tumor suppressor LUCA15, RNA-binding motif protein 5, Renal carcinoma antigen NY-REN-9	1.25777	1.2155		P05556	ITGB1	Integrin beta-1, Fibronectin receptor subunit beta, Glycoprotein IIa, GPIIA, VLA-4 subunit beta, CD29	-0.0276566	-0.928926
Q8N1G4	LRRC47	Leucine-rich repeat-containing protein 47	1.25206	0.4044		Q15058	KIF14	Kinesin-like protein KIF14	-0.0388534	-0.0422132
Q9NW13	RBM28	RNA-binding protein 28, RNA-binding motif protein 28	0.974775	0.754313		O75165	DNAJC13	DnaJ homolog subfamily C member 13, Required for receptor-mediated endocytosis 8, RME-8	-0.275841	-1.83432
P78316	NOP14	Nucleolar protein 14, Nucleolar complex protein 14	1.28519	0.327003		Q96FS4	SIPA1	Signal-induced proliferation-associated protein 1, Sipa-1, GTPase-activating protein Spa-1, p130 SPA-1	-0.166221	-1.50968
Q96PU8	QKI	KH domain-containing RNA-binding protein QKI, Protein quaking, Hqk, HqkI	1.87025	0.720968		P50213	IDH3A	Isocitrate dehydrogenase [NAD] subunit alpha, mitochondrial, 1.1.1.41, Isocitric dehydrogenase subunit alpha, NAD(+)-specific ICDH subunit alpha	-0.0656269	-1.6472
P55265	ADAR	Double-stranded RNA-specific adenosine deaminase, DRADA, 3.5.4.37, 136 kDa double-stranded RNA-binding protein, p136, Interferon-inducible protein 4, IFI-4, K88DSRBP	1.06543	0.228179		O60488	ACSL4	Long-chain-fatty-acid--CoA ligase 4, 6.2.1.3, Arachidonate--CoA ligase, 6.2.1.15, Long-chain acyl-CoA synthetase 4, LACS 4	-0.0725147	-1.88588
Q96GQ7	DDX27	Probable ATP-dependent RNA helicase DDX27, 3.6.4.13, DEAD box protein 27	1.04309	0.414333		Q9BW27	NUP85	Nuclear pore complex protein Nup85, 85 kDa nucleoporin, FROUNT, Nucleoporin Nup75, Nucleoporin Nup85, Pericentrin-1	-0.0766129	-1.54255
Q1KMD3	HNRNPUL2	Heterogeneous nuclear ribonucleoprotein U-like protein 2, Scaffold-attachment factor A2, SAF-A2	1.06281	0.685736		P40939	HADHA	Trifunctional enzyme subunit alpha, mitochondrial, 78 kDa gastrin-binding protein, Monolysocardiolipin acyltransferase, 2.3.1.-, TP-alpha, Long-chain enoyl-CoA hydratase, 4.2.1.17, Long chain 3-hydroxyacyl-CoA dehydrogenase, 1.1.1.211	-0.0571508	-1.72285
Q15269	PWP2	Periodic tryptophan protein 2 homolog	1.04402	0.534758		Q02218	OGDH	2-oxoglutarate dehydrogenase complex component E1, E1o, OGDC-E1, OGDH-E1, 1.2.4.2, 2-oxoglutarate dehydrogenase, mitochondrial, Alpha-ketoglutarate dehydrogenase, Alpha-KGDH-E1, Thiamine diphosphate (ThDP)-dependent 2-oxoglutarate dehydrogenase	-0.0635179	-1.3294
O43896	KIF1C	Kinesin-like protein KIF1C	1.39777	0.968451		P23919	DTYMK	Thymidylate kinase, 2.7.4.9, dTMP kinase	-0.0434769	-0.97686
Q9UNQ2	DIMT1	Probable dimethyladenosine transferase, 2.1.1.183, DIM1 dimethyladenosine transferase 1 homolog, DIM1 dimethyladenosine transferase 1-like, Probable 18S rRNA (adenine(1779)-N(6)/adenine(1780)-N(6))-dimethyltransferase, Probable 18S rRNA dimethylase, Probable S-adenosylmethionine-6-N',N'-adenosyl(rRNA) dimethyltransferase	1.62317	-0.206284		P35520	CBS	Cystathionine beta-synthase, 4.2.1.22, Beta-thionase, Serine sulfhydrase	-0.109598	-1.98275
Q9BQ04	RBM4B	RNA-binding protein 4B, RNA-binding motif protein 30, RNA-binding motif protein 4B, RNA-binding protein 30	1.60381	1.40335		O15143	ARPC1B	Actin-related protein 2/3 complex subunit 1B, Arp2/3 complex 41 kDa subunit, p41-ARC	-0.0608277	-1.44133
O75691	UTP20	Small subunit processome component 20 homolog, Down-regulated in metastasis protein, Novel nucleolar protein 73, NNP73, Protein Key-1A6	1.0412	0.345162		Q5JRX3	PITRM1	Presequence protease, mitochondrial, hPreP, 3.4.24.-, Pitrilysin metalloproteinase 1, Metalloprotease 1, hMP1	-0.197449	-1.76191
P46781	RPS9	40S ribosomal protein S9, Small ribosomal subunit protein uS4	1.03755	-0.513871		P35606	COPB2	Coatomer subunit beta', Beta'-coat protein, Beta'-COP, p102	-0.0590807	-1.2539
Q9BY77	POLDIP3	Polymerase delta-interacting protein 3, 46 kDa DNA polymerase delta interaction protein, p46, S6K1 Aly/REF-like target, SKAR	1.25737	0.0398436		Q9HD67	MYO10	Unconventional myosin-X, Unconventional myosin-10	-0.40568	-1.06277
Q96T58	SPEN	Msx2-interacting protein, SMART/HDAC1-associated repressor protein, SPEN homolog	0.931208	1.18712		Q02241	KIF23	Kinesin-like protein KIF23, Kinesin-like protein 5, Mitotic kinesin-like protein 1	-0.0617507	-0.0978253
O95478	NSA2	Ribosome biogenesis protein NSA2 homolog, Hairy cell leukemia protein 1, TGF-beta-inducible nuclear protein 1	1.16501	0.378433		Q15021	NCAPD2	Condensin complex subunit 1, Chromosome condensation-related SMC-associated protein 1, Chromosome-associated protein D2, hCAP-D2, Non-SMC condensin I complex subunit D2, XCAP-D2 homolog	-0.0836169	-1.46135
Q9Y3Y2	CHTOP	Chromatin target of PRMT1 protein, Friend of PRMT1 protein, Small arginine- and glycine-rich protein, SRAG	1.1749	0.426861		Q9NU22	MDN1	Midasin, Dynein-related AAA-ATPase MDN1, MIDAS-containing protein	-0.0805063	-0.212443
P62899	RPL31	60S ribosomal protein L31, Large ribosomal subunit protein eL31	0.921112	-0.0629905		O75962	TRIO	Triple functional domain protein, 2.7.11.1, PTPRF-interacting protein	-0.169022	-0.651686
O00425	IGF2BP3	Insulin-like growth factor 2 mRNA-binding protein 3, IGF2 mRNA-binding protein 3, IMP-3, IGF-II mRNA-binding protein 3, KH domain-containing protein overexpressed in cancer, hKOC, VICKZ family member 3	0.951271	0.674081		O00159	MYO1C	Unconventional myosin-Ic, Myosin I beta, MMI-beta, MMIb	-0.137117	-2.10453
P46087	NOP2	Probable 28S rRNA (cytosine(4447)-C(5))-methyltransferase, 2.1.1.-, Nucleolar protein 1, Nucleolar protein 2 homolog, Proliferating-cell nucleolar antigen p120, Proliferation-associated nucleolar protein p120	1.01551	-0.0259998		Q15392	DHCR24	Delta(24)-sterol reductase, 1.3.1.72, 24-dehydrocholesterol reductase, 3-beta-hydroxysterol Delta-24-reductase, Diminuto/dwarf1 homolog, Seladin-1	-0.0680499	-0.390853
Q96EY7	PTCD3	Pentatricopeptide repeat domain-containing protein 3, mitochondrial, 28S ribosomal protein S39, mitochondrial, MRP-S39, Mitochondrial small ribosomal subunit protein mS39, Transformation-related gene 15 protein, TRG-15	0.959811	0.554711		P25205	MCM3	DNA replication licensing factor MCM3, 3.6.4.12, DNA polymerase alpha holoenzyme-associated protein P1, P1-MCM3, RLF subunit beta, p102	-0.0888964	-1.5847
Q969S3	ZNF622	Cytoplasmic 60S subunit biogenesis factor ZNF622, Zinc finger protein 622, Zinc finger-like protein 9	1.24577	0.314372		Q13619	CUL4A	Cullin-4A, CUL-4A	-0.119238	-1.98072
Q8IWR0	ZC3H7A	Zinc finger CCCH domain-containing protein 7A	1.11421	1.44747		Q6KC79	NIPBL	Nipped-B-like protein, Delangin, SCC2 homolog	-0.102485	-0.622214
Q9H7B2	RPF2	Ribosome production factor 2 homolog, Brix domain-containing protein 1, Ribosome biogenesis protein RPF2 homolog	1.10447	0.185916		Q13045	FLII	Protein flightless-1 homolog	-0.125204	-1.61943
Q9H000	MKRN2	E3 ubiquitin-protein ligase makorin-2, 2.3.2.27, RING finger protein 62, RING-type E3 ubiquitin transferase makorin-2	1.85218	0.501817		P28331	NDUFS1	NADH-ubiquinone oxidoreductase 75 kDa subunit, mitochondrial, 7.1.1.2, Complex I-75kD, CI-75kD	-0.223081	-1.87465
P79522	PRR3	Proline-rich protein 3, MHC class I region proline-rich protein CAT56	1.48868	1.84173		Q14160	SCRIB	Protein scribble homolog, Scribble, hScrib, Protein LAP4	-0.134854	-0.654079
Q96MU7	YTHDC1	YTH domain-containing protein 1, Splicing factor YT521, YT521-B	1.21712	0.290304		Q9NTI5	PDS5B	Sister chromatid cohesion protein PDS5 homolog B, Androgen-induced proliferation inhibitor, Androgen-induced prostate proliferative shutoff-associated protein AS3	-0.159199	-1.22283
P63244	RACK1	Receptor of activated protein C kinase 1, Cell proliferation-inducing gene 21 protein, Guanine nucleotide-binding protein subunit beta-2-like 1, Guanine nucleotide-binding protein subunit beta-like protein 12.3, Human lung cancer oncogene 7 protein, HLC-7, Receptor for activated C kinase, Small ribosomal subunit protein RACK1	1.03383	-0.626988		P29401	TKT	Transketolase, TK, 2.2.1.1	-0.0793155	-1.94982
Q8N3Z6	ZCCHC7	Zinc finger CCHC domain-containing protein 7, TRAMP-like complex RNA-binding factor ZCCHC7	1.66539	0.964756		P52789	HK2	Hexokinase-2, 2.7.1.1, Hexokinase type II, HK II, Hexokinase-B, Muscle form hexokinase	-0.138863	-1.82835
Q9Y4Z0	LSM4	U6 snRNA-associated Sm-like protein LSm4, Glycine-rich protein, GRP	1.58815	-0.102072		Q9Y490	TLN1	Talin-1	-0.0954775	-1.04869
Q8IWZ3	ANKHD1	Ankyrin repeat and KH domain-containing protein 1, HIV-1 Vpr-binding ankyrin repeat protein, Multiple ankyrin repeats single KH domain, hMASK	1.32872	0.483137		P57740	NUP107	Nuclear pore complex protein Nup107, 107 kDa nucleoporin, Nucleoporin Nup107	-0.122388	-1.09116
P61254	RPL26	60S ribosomal protein L26, Large ribosomal subunit protein uL24	0.869221	-0.104143		P49189	ALDH9A1	4-trimethylaminobutyraldehyde dehydrogenase, TMABA-DH, TMABALDH, 1.2.1.47, Aldehyde dehydrogenase E3 isozyme, Aldehyde dehydrogenase family 9 member A1, 1.2.1.3, Gamma-aminobutyraldehyde dehydrogenase, 1.2.1.19, R-aminobutyraldehyde dehydrogenase	-0.208361	-2.0265
Q99590	SCAF11	Protein SCAF11, CTD-associated SR protein 11, Renal carcinoma antigen NY-REN-40, SC35-interacting protein 1, SR-related and CTD-associated factor 11, SRSF2-interacting protein, Serine/arginine-rich splicing factor 2-interacting protein, Splicing factor, arginine/serine-rich 2-interacting protein, Splicing regulatory protein 129, SRrp129	1.29137	0.482605		O95347	SMC2	Structural maintenance of chromosomes protein 2, SMC protein 2, SMC-2, Chromosome-associated protein E, hCAP-E, XCAP-E homolog	-0.118339	-1.37591
Q96P11	NSUN5	28S rRNA (cytosine-C(5))-methyltransferase, 2.1.1.-, NOL1-related protein, NOL1R, NOL1/NOP2/Sun domain family member 5, Williams-Beuren syndrome chromosomal region 20A protein	1.04698	0.845428		P42224	STAT1	Signal transducer and activator of transcription 1-alpha/beta, Transcription factor ISGF-3 components p91/p84	-0.20289	-1.60231
Q96AG4	LRRC59	Leucine-rich repeat-containing protein 59, Ribosome-binding protein p34, p34	1.21217	-0.323017		Q13085	ACACA	Acetyl-CoA carboxylase 1, ACC1, 6.4.1.2, Acetyl-Coenzyme A carboxylase alpha, ACC-alpha	-0.204414	-1.64092
O43159	RRP8	Ribosomal RNA-processing protein 8, 2.1.1.-, Cerebral protein 1, Nucleomethylin	1.12559	0.523818		P30084	ECHS1	Enoyl-CoA hydratase, mitochondrial, mECH, mECH1, 4.2.1.17, 5.3.3.8, Enoyl-CoA hydratase 1, ECHS1, Short-chain enoyl-CoA hydratase, SCEH	-0.113007	-0.802266
O75821	EIF3G	Eukaryotic translation initiation factor 3 subunit G, eIF3g, Eukaryotic translation initiation factor 3 RNA-binding subunit, eIF-3 RNA-binding subunit, Eukaryotic translation initiation factor 3 subunit 4, eIF-3-delta, eIF3 p42, eIF3 p44	1.06242	-0.0248558		Q9NQW6	ANLN	Anillin	-0.188909	-0.965378
P98175	RBM10	RNA-binding protein 10, G patch domain-containing protein 9, RNA-binding motif protein 10, RNA-binding protein S1-1, S1-1	0.986928	0.804448		P11172	UMPS	Uridine 5'-monophosphate synthase, UMP synthase, Orotate phosphoribosyltransferase, OPRT, OPRTase, 2.4.2.10, Orotidine 5'-phosphate decarboxylase, ODC, OMPD, 4.1.1.23, OMPdecase	-0.186632	-1.45814
Q8NE71	ABCF1	ATP-binding cassette sub-family F member 1, ATP-binding cassette 50, TNF-alpha-stimulated ABC protein	0.961182	0.291698		Q9H3U1	UNC45A	Protein unc-45 homolog A, Unc-45A, GCUNC-45, Smooth muscle cell-associated protein 1, SMAP-1	-0.243821	-1.5311
P20290	BTF3	Transcription factor BTF3, Nascent polypeptide-associated complex subunit beta, NAC-beta, RNA polymerase B transcription factor 3	1.128	-0.519216		P41250	GARS1	Glycine--tRNA ligase, 6.1.1.14, Diadenosine tetraphosphate synthetase, Ap4A synthetase, 2.7.7.-, Glycyl-tRNA synthetase, GlyRS, Glycyl-tRNA synthetase 1	-0.178082	-1.73703
Q9NRA8	EIF4ENIF1	Eukaryotic translation initiation factor 4E transporter, 4E-T, eIF4E transporter, Eukaryotic translation initiation factor 4E nuclear import factor 1	1.93336	0.888123		Q96TA1	NIBAN2	Protein Niban 2, Meg-3, Melanoma invasion by ERK, MINERVA, Niban-like protein 1, Protein FAM129B	-0.234257	-1.73694
Q15050	RRS1	Ribosome biogenesis regulatory protein homolog	0.975878	0.452459		Q06210	GFPT1	Glutamine--fructose-6-phosphate aminotransferase [isomerizing] 1, 2.6.1.16, D-fructose-6-phosphate amidotransferase 1, Glutamine:fructose-6-phosphate amidotransferase 1, GFAT 1, GFAT1, Hexosephosphate aminotransferase 1	-0.226819	-1.78358
Q15637	SF1	Splicing factor 1, Mammalian branch point-binding protein, BBP, mBBP, Transcription factor ZFM1, Zinc finger gene in MEN1 locus, Zinc finger protein 162	1.00878	0.468719		P07195	LDHB	L-lactate dehydrogenase B chain, LDH-B, 1.1.1.27, LDH heart subunit, LDH-H, Renal carcinoma antigen NY-REN-46	-0.136917	-2.12228
Q8NCA5	FAM98A	Protein FAM98A	1.13435	0.798903		A0AVT1	UBA6	Ubiquitin-like modifier-activating enzyme 6, Ubiquitin-activating enzyme 6, 6.2.1.45, Monocyte protein 4, MOP-4, Ubiquitin-activating enzyme E1-like protein 2, E1-L2	-0.27375	-1.2103
Q5T653	MRPL2	39S ribosomal protein L2, mitochondrial, L2mt, MRP-L2, Mitochondrial large ribosomal subunit protein uL2m	1.09601	0.804403		Q9NR09	BIRC6	Baculoviral IAP repeat-containing protein 6, 2.3.2.27, BIR repeat-containing ubiquitin-conjugating enzyme, BRUCE, RING-type E3 ubiquitin transferase BIRC6, Ubiquitin-conjugating BIR domain enzyme apollon, APOLLON	-0.231941	-0.196069
O60306	AQR	RNA helicase aquarius, 3.6.4.13, Intron-binding protein of 160 kDa, IBP160	1.02565	0.579076		P11413	G6PD	Glucose-6-phosphate 1-dehydrogenase, G6PD, 1.1.1.49	-0.224754	-1.98135
Q9BYK8	HELZ2	Helicase with zinc finger domain 2, ATP-dependent helicase PRIC285, Helicase with zinc finger 2, transcriptional coactivator, PPAR-alpha-interacting complex protein 285, PPAR-gamma DNA-binding domain-interacting protein 1, PDIP1, PPAR-gamma DBD-interacting protein 1, Peroxisomal proliferator-activated receptor A-interacting complex 285 kDa protein, 3.6.4.-	1.24478	0.931044		Q9NUQ3	TXLNG	Gamma-taxilin, Environmental lipopolysaccharide-responding gene protein, Factor inhibiting ATF4-mediated transcription, FIAT, Lipopolysaccharide-specific response protein 5	-0.198997	-0.659808
O75153	CLUH	Clustered mitochondria protein homolog	0.97718	-0.0178538		P06576	ATP5F1B	ATP synthase subunit beta, mitochondrial, 7.1.2.2, ATP synthase F1 subunit beta	-0.157857	-1.55485
Q9H2U1	DHX36	ATP-dependent DNA/RNA helicase DHX36, 3.6.4.12, 3.6.4.13, DEAD/H box polypeptide 36, DEAH-box protein 36, G4-resolvase-1, G4R1, MLE-like protein 1, RNA helicase associated with AU-rich element protein	1.13157	0.368584		Q66K14	TBC1D9B	TBC1 domain family member 9B	-0.728152	-1.34842
Q9H8H2	DDX31	Probable ATP-dependent RNA helicase DDX31, 3.6.4.13, DEAD box protein 31, Helicain	1.21617	0.18098		P55060	CSE1L	Exportin-2, Exp2, Cellular apoptosis susceptibility protein, Chromosome segregation 1-like protein, Importin-alpha re-exporter	-0.229364	-1.99969
P12956	XRCC6	X-ray repair cross-complementing protein 6, 3.6.4.-, 4.2.99.-, 5'-deoxyribose-5-phosphate lyase Ku70, 5'-dRP lyase Ku70, 70 kDa subunit of Ku antigen, ATP-dependent DNA helicase 2 subunit 1, ATP-dependent DNA helicase II 70 kDa subunit, CTC box-binding factor 75 kDa subunit, CTC75, CTCBF, DNA repair protein XRCC6, Lupus Ku autoantigen protein p70, Ku70, Thyroid-lupus autoantigen, TLAA, X-ray repa…	0.942354	-0.2349		Q01650	SLC7A5	Large neutral amino acids transporter small subunit 1, 4F2 light chain, 4F2 LC, 4F2LC, CD98 light chain, Integral membrane protein E16, E16, L-type amino acid transporter 1, hLAT1, Solute carrier family 7 member 5, y+ system cationic amino acid transporter	-0.220302	-2.00372
P19525	EIF2AK2	Interferon-induced, double-stranded RNA-activated protein kinase, 2.7.11.1, Eukaryotic translation initiation factor 2-alpha kinase 2, eIF-2A protein kinase 2, Interferon-inducible RNA-dependent protein kinase, P1/eIF-2A protein kinase, Protein kinase RNA-activated, PKR, Protein kinase R, Tyrosine-protein kinase EIF2AK2, 2.7.10.2, p68 kinase	1.27505	-0.0886375		P38606	ATP6V1A	V-type proton ATPase catalytic subunit A, V-ATPase subunit A, 7.1.2.2, V-ATPase 69 kDa subunit, Vacuolar ATPase isoform VA68, Vacuolar proton pump subunit alpha	-0.362622	-2.07347
Q99575	POP1	Ribonucleases P/MRP protein subunit POP1, hPOP1	0.903539	0.404739		Q14839	CHD4	Chromodomain-helicase-DNA-binding protein 4, CHD-4, 3.6.4.12, ATP-dependent helicase CHD4, Mi-2 autoantigen 218 kDa protein, Mi2-beta	-0.226864	-1.21008
Q12906	ILF3	Interleukin enhancer-binding factor 3, Double-stranded RNA-binding protein 76, DRBP76, M-phase phosphoprotein 4, MPP4, Nuclear factor associated with dsRNA, NFAR, Nuclear factor of activated T-cells 90 kDa, NF-AT-90, Translational control protein 80, TCP80	0.755138	0.532705		Q9Y230	RUVBL2	RuvB-like 2, 3.6.4.12, 48 kDa TATA box-binding protein-interacting protein, 48 kDa TBP-interacting protein, 51 kDa erythrocyte cytosolic protein, ECP-51, INO80 complex subunit J, Repressing pontin 52, Reptin 52, TIP49b, TIP60-associated protein 54-beta, TAP54-beta	-0.333911	-2.19591
P60468	SEC61B	Protein transport protein Sec61 subunit beta	1.43075	-0.246241		P13797	PLS3	Plastin-3, T-plastin	-0.230491	-1.36583
Q15032	R3HDM1	R3H domain-containing protein 1	1.18805	1.54796		Q92598	HSPH1	Heat shock protein 105 kDa, Antigen NY-CO-25, Heat shock 110 kDa protein	-0.201207	-0.959519
P26373	RPL13	60S ribosomal protein L13, Breast basic conserved protein 1, Large ribosomal subunit protein eL13	0.945363	-0.715737		P18206	VCL	Vinculin, Metavinculin, MV	-0.267026	-1.68081
P13010	XRCC5	X-ray repair cross-complementing protein 5, 3.6.4.-, 86 kDa subunit of Ku antigen, ATP-dependent DNA helicase 2 subunit 2, ATP-dependent DNA helicase II 80 kDa subunit, CTC box-binding factor 85 kDa subunit, CTC85, CTCBF, DNA repair protein XRCC5, Ku80, Ku86, Lupus Ku autoantigen protein p86, Nuclear factor IV, Thyroid-lupus autoantigen, TLAA, X-ray repair complementing defective repair in Chines…	0.898373	-0.131679		Q66K74	MAP1S	Microtubule-associated protein 1S, MAP-1S, BPY2-interacting protein 1, Microtubule-associated protein 8, Variable charge Y chromosome 2-interacting protein 1, VCY2-interacting protein 1, VCY2IP-1	-0.368301	-0.465759
Q96QR8	PURB	Transcriptional activator protein Pur-beta, Purine-rich element-binding protein B	1.17548	0.311361		P11586	MTHFD1	C-1-tetrahydrofolate synthase, cytoplasmic, C1-THF synthase, Epididymis secretory sperm binding protein, Methylenetetrahydrofolate dehydrogenase, 1.5.1.5, Methenyltetrahydrofolate cyclohydrolase, 3.5.4.9, Formyltetrahydrofolate synthetase, 6.3.4.3	-0.358771	-2.09352
Q86XP3	DDX42	ATP-dependent RNA helicase DDX42, 3.6.4.13, DEAD box protein 42, RNA helicase-like protein, RHELP, RNA helicase-related protein, RNAHP, SF3b DEAD box protein, Splicing factor 3B-associated 125 kDa protein, SF3b125	1.24715	-0.244225		P78371	CCT2	T-complex protein 1 subunit beta, TCP-1-beta, CCT-beta	-0.278556	-2.02522
P23588	EIF4B	Eukaryotic translation initiation factor 4B, eIF-4B	0.735302	0.406832		O00231	PSMD11	26S proteasome non-ATPase regulatory subunit 11, 26S proteasome regulatory subunit RPN6, 26S proteasome regulatory subunit S9, 26S proteasome regulatory subunit p44.5	-0.277685	-1.45771
P08865	RPSA	40S ribosomal protein SA, 37 kDa laminin receptor precursor, 37LRP, 37/67 kDa laminin receptor, LRP/LR, 67 kDa laminin receptor, 67LR, Colon carcinoma laminin-binding protein, Laminin receptor 1, LamR, Laminin-binding protein precursor p40, LBP/p40, Multidrug resistance-associated protein MGr1-Ag, NEM/1CHD4, Small ribosomal subunit protein uS2	1.05645	-0.510533		Q9Y678	COPG1	Coatomer subunit gamma-1, Gamma-1-coat protein, Gamma-1-COP	-0.427923	-2.10184
O15042	U2SURP	U2 snRNP-associated SURP motif-containing protein, 140 kDa Ser/Arg-rich domain protein, U2-associated protein SR140	0.901692	-0.279366		P50990	CCT8	T-complex protein 1 subunit theta, TCP-1-theta, CCT-theta, Chaperonin containing T-complex polypeptide 1 subunit 8, Renal carcinoma antigen NY-REN-15	-0.305826	-2.20491
Q86TG7	PEG10	Retrotransposon-derived protein PEG10, Embryonal carcinoma differentiation-regulated protein, Mammalian retrotransposon-derived protein 2, Myelin expression factor 3-like protein 1, MEF3-like protein 1, Paternally expressed gene 10 protein, Retrotransposon gag domain-containing protein 3, Retrotransposon-derived gag-like polyprotein, Ty3/Gypsy-like protein	1.22783	0.588733		Q8TAT6	NPLOC4	Nuclear protein localization protein 4 homolog, Protein NPL4	-0.67511	-2.28159
Q7L014	DDX46	Probable ATP-dependent RNA helicase DDX46, 3.6.4.13, DEAD box protein 46, PRP5 homolog	1.08322	-0.147561		Q86V48	LUZP1	Leucine zipper protein 1	-0.398732	-0.547394
Q7Z739	YTHDF3	YTH domain-containing family protein 3, DF3	1.06058	0.335281		Q5T4S7	UBR4	E3 ubiquitin-protein ligase UBR4, 2.3.2.27, 600 kDa retinoblastoma protein-associated factor, N-recognin-4, RING-type E3 ubiquitin transferase UBR4, Retinoblastoma-associated factor of 600 kDa, RBAF600, p600, Zinc finger UBR1-type protein 1	-0.289122	-1.03455
Q15397	PUM3	Pumilio homolog 3, HBV X-transactivated gene 5 protein, HBV XAg-transactivated protein 5, Minor histocompatibility antigen HA-8, HLA-HA8	0.983367	0.381106		Q99536	VAT1	Synaptic vesicle membrane protein VAT-1 homolog, 1.-.-.-	-0.656269	-2.3438
O00567	NOP56	Nucleolar protein 56, Nucleolar protein 5A	0.974071	-0.0836218		P04083	ANXA1	Annexin A1, Annexin I, Annexin-1, Calpactin II, Calpactin-2, Chromobindin-9, Lipocortin I, Phospholipase A2 inhibitory protein, p35	-0.391155	-2.1664
Q13243	SRSF5	Serine/arginine-rich splicing factor 5, Delayed-early protein HRS, Pre-mRNA-splicing factor SRP40, Splicing factor, arginine/serine-rich 5	0.898688	0.68276		P22102	GART	Trifunctional purine biosynthetic protein adenosine-3, Phosphoribosylamine--glycine ligase, 6.3.4.13, Glycinamide ribonucleotide synthetase, GARS, Phosphoribosylglycinamide synthetase, Phosphoribosylformylglycinamidine cyclo-ligase, 6.3.3.1, AIR synthase, AIRS, Phosphoribosyl-aminoimidazole synthetase, Phosphoribosylglycinamide formyltransferase, 2.1.2.2, 5'-phosphoribosylglycinamide transformyla…	-0.304722	-1.69693
P62277	RPS13	40S ribosomal protein S13, Small ribosomal subunit protein uS15	0.961661	-0.651616		P22234	PAICS	Bifunctional phosphoribosylaminoimidazole carboxylase/phosphoribosylaminoimidazole succinocarboxamide synthetase, PAICS, Phosphoribosylaminoimidazole carboxylase, 4.1.1.21, AIR carboxylase, AIRC, Phosphoribosylaminoimidazole succinocarboxamide synthetase, 6.3.2.6, SAICAR synthetase	-0.479134	-2.48889
O00422	SAP18	Histone deacetylase complex subunit SAP18, 18 kDa Sin3-associated polypeptide, 2HOR0202, Cell growth-inhibiting gene 38 protein, Sin3-associated polypeptide p18	1.3016	-0.330128		O00203	AP3B1	Adaptor-related protein complex 3 beta 1 subunit isoform 1	-0.342472	-1.06038
Q7Z417	NUFIP2	FMR1-interacting protein NUFIP2, 82 kDa FMRP-interacting protein, 82-FIP, Cell proliferation-inducing gene 1 protein, FMRP-interacting protein 2, Nuclear FMR1-interacting protein 2	0.985041	0.587497		Q15645	TRIP13	Pachytene checkpoint protein 2 homolog, Human papillomavirus type 16 E1 protein-binding protein, 16E1-BP, HPV16 E1 protein-binding protein, Thyroid hormone receptor interactor 13, Thyroid receptor-interacting protein 13, TR-interacting protein 13, TRIP-13	-0.262701	-0.933559
O75152	ZC3H11A	Zinc finger CCCH domain-containing protein 11A	1.08403	0.550759		O14646	CHD1	Chromodomain-helicase-DNA-binding protein 1, CHD-1, 3.6.4.12, ATP-dependent helicase CHD1	-0.374244	-0.503034
P50750	CDK9	Cyclin-dependent kinase 9, 2.7.11.22, 2.7.11.23, C-2K, Cell division cycle 2-like protein kinase 4, Cell division protein kinase 9, Serine/threonine-protein kinase PITALRE, Tat-associated kinase complex catalytic subunit	1.51501	0.150935		P17858	PFKL	ATP-dependent 6-phosphofructokinase, liver type, ATP-PFK, PFK-L, 2.7.1.11, 6-phosphofructokinase type B, Phosphofructo-1-kinase isozyme B, PFK-B, Phosphohexokinase	-0.631567	-2.00149
Q8WTT2	NOC3L	Nucleolar complex protein 3 homolog, NOC3 protein homolog, Factor for adipocyte differentiation 24, NOC3-like protein, Nucleolar complex-associated protein 3-like protein	0.999888	0.166968		P07437	TUBB	Tubulin beta chain, Tubulin beta-5 chain	-0.252846	-1.74883
Q5VYS8	TUT7	Terminal uridylyltransferase 7, TUTase 7, 2.7.7.52, Zinc finger CCHC domain-containing protein 6	1.14398	0.798184		Q99832	CCT7	T-complex protein 1 subunit eta, TCP-1-eta, CCT-eta, HIV-1 Nef-interacting protein	-0.416854	-2.2429
P47813	EIF1AX	Eukaryotic translation initiation factor 1A, X-chromosomal, eIF-1A X isoform, Eukaryotic translation initiation factor 4C, eIF-4C	1.1473	-0.50775		P23381	WARS1	Tryptophan--tRNA ligase, cytoplasmic, 6.1.1.2, Interferon-induced protein 53, IFP53, Tryptophanyl-tRNA synthetase, TrpRS, hWRS	-0.570002	-1.95986
Q9Y3A5	SBDS	Ribosome maturation protein SBDS, Shwachman-Bodian-Diamond syndrome protein	1.19533	-0.607077		P53618	COPB1	Coatomer subunit beta, Beta-coat protein, Beta-COP	-0.574142	-1.77824
Q9NQ55	PPAN	Suppressor of SWI4 1 homolog, Ssf-1, Brix domain-containing protein 3, Peter Pan homolog	0.909629	0.429764		P53396	ACLY	ATP-citrate synthase, 2.3.3.8, ATP-citrate (pro-S-)-lyase, ACL, Citrate cleavage enzyme	-0.523131	-2.30954
Q96KR1	ZFR	Zinc finger RNA-binding protein, hZFR, M-phase phosphoprotein homolog	0.955328	0.44515		O43175	PHGDH	D-3-phosphoglycerate dehydrogenase, 3-PGDH, 1.1.1.95, 2-oxoglutarate reductase, 1.1.1.399, Malate dehydrogenase, 1.1.1.37	-0.511142	-2.34179
Q14137	BOP1	Ribosome biogenesis protein BOP1, Block of proliferation 1 protein	1.14089	-0.128358		Q01813	PFKP	ATP-dependent 6-phosphofructokinase, platelet type, ATP-PFK, PFK-P, 2.7.1.11, 6-phosphofructokinase type C, Phosphofructo-1-kinase isozyme C, PFK-C, Phosphohexokinase	-0.541486	-2.13065
Q92615	LARP4B	La-related protein 4B, La ribonucleoprotein domain family member 4B, La ribonucleoprotein domain family member 5, La-related protein 5	1.14457	0.471045		Q86VP6	CAND1	Cullin-associated NEDD8-dissociated protein 1, Cullin-associated and neddylation-dissociated protein 1, TBP-interacting protein of 120 kDa A, TBP-interacting protein 120A, p120 CAND1	-0.633288	-2.30288
O00566	MPHOSPH10	U3 small nucleolar ribonucleoprotein protein MPP10, M phase phosphoprotein 10	1.05045	0.211256		P60709	ACTB	Actin, cytoplasmic 1, 3.6.4.-, Beta-actin	-0.324915	-2.06468
Q8N163	CCAR2	Cell cycle and apoptosis regulator protein 2, Cell division cycle and apoptosis regulator protein 2, DBIRD complex subunit KIAA1967, Deleted in breast cancer gene 1 protein, DBC-1, DBC.1, NET35, p30 DBC	1.08266	-0.0113281		P51659	HSD17B4	Peroxisomal multifunctional enzyme type 2, MFE-2, 17-beta-hydroxysteroid dehydrogenase 4, 17-beta-HSD 4, D-bifunctional protein, DBP, Multifunctional protein 2, MFP-2, Short chain dehydrogenase/reductase family 8C member 1	-0.622109	-1.6981
Q8N8A6	DDX51	ATP-dependent RNA helicase DDX51, 3.6.4.13, DEAD box protein 51	1.5737	0.36875		P00558	PGK1	Phosphoglycerate kinase 1, 2.7.2.3, Cell migration-inducing gene 10 protein, Primer recognition protein 2, PRP 2	-0.460035	-1.92357
Q13895	BYSL	Bystin	1.00953	0.261485		P27708	CAD	CAD protein, Glutamine-dependent carbamoyl-phosphate synthase, 6.3.5.5, Aspartate carbamoyltransferase, 2.1.3.2, Dihydroorotase, 3.5.2.3	-0.450338	-0.124934
Q9NTZ6	RBM12	RNA-binding protein 12, RNA-binding motif protein 12, SH3/WW domain anchor protein in the nucleus, SWAN	1.17251	0.227548		P17655	CAPN2	Calpain-2 catalytic subunit, 3.4.22.53, Calcium-activated neutral proteinase 2, CANP 2, Calpain M-type, Calpain large polypeptide L2, Calpain-2 large subunit, Millimolar-calpain, M-calpain	-0.616331	-0.682119
P60866	RPS20	40S ribosomal protein S20, Small ribosomal subunit protein uS10	0.962222	-0.378055		P53621	COPA	Coatomer subunit alpha, Alpha-coat protein, Alpha-COP, HEP-COP, HEPCOP	-0.54064	-0.522823
Q9Y285	FARSA	Phenylalanine--tRNA ligase alpha subunit, 6.1.1.20, CML33, Phenylalanyl-tRNA synthetase alpha subunit, PheRS	1.04446	-0.0365312		P32119	PRDX2	Peroxiredoxin-2, 1.11.1.24, Natural killer cell-enhancing factor B, NKEF-B, PRP, Thiol-specific antioxidant protein, TSA, Thioredoxin peroxidase 1, Thioredoxin-dependent peroxide reductase 1, Thioredoxin-dependent peroxiredoxin 2	-1.21953	-2.82823
Q9Y5A9	YTHDF2	YTH domain-containing family protein 2, DF2, CLL-associated antigen KW-14, High-glucose-regulated protein 8, Renal carcinoma antigen NY-REN-2	1.07387	0.411003		P04406	GAPDH	Glyceraldehyde-3-phosphate dehydrogenase, GAPDH, 1.2.1.12, Peptidyl-cysteine S-nitrosylase GAPDH, 2.6.99.-	-0.940858	-2.7784
P78346	RPP30	Ribonuclease P protein subunit p30, RNaseP protein p30, RNase P subunit 2	1.44856	-0.14439
Q9P031	CCDC59	Thyroid transcription factor 1-associated protein 26, TTF-1-associated protein 26, Coiled-coil domain-containing protein 59, TTF-1-associated protein BR2	1.17913	0.572941
Q9HCD5	NCOA5	Nuclear receptor coactivator 5, NCoA-5, Coactivator independent of AF-2, CIA	1.36465	-0.128288
Q9NY61	AATF	Protein AATF, Apoptosis-antagonizing transcription factor, Rb-binding protein Che-1	1.18428	0.324546
P78344	EIF4G2	Eukaryotic translation initiation factor 4 gamma 2, eIF-4-gamma 2, eIF-4G 2, eIF4G 2, Death-associated protein 5, DAP-5, p97	0.981737	-0.224351
P06748	NPM1	Nucleophosmin, NPM, Nucleolar phosphoprotein B23, Nucleolar protein NO38, Numatrin	0.729465	-0.601211
P84103	SRSF3	Serine/arginine-rich splicing factor 3, Pre-mRNA-splicing factor SRP20, Splicing factor, arginine/serine-rich 3	0.692455	0.605334
Q9ULX6	AKAP8L	A-kinase anchor protein 8-like, AKAP8-like protein, Helicase A-binding protein 95, HAP95, Homologous to AKAP95 protein, HA95, Neighbor of A-kinase-anchoring protein 95, Neighbor of AKAP95	1.0836	0.731053
P25398	RPS12	40S ribosomal protein S12, Small ribosomal subunit protein eS12	1.30511	-1.16031
P62318	SNRPD3	Small nuclear ribonucleoprotein Sm D3, Sm-D3, snRNP core protein D3	1.09162	-0.518399
Q92499	DDX1	ATP-dependent RNA helicase DDX1, 3.6.4.13, DEAD box protein 1, DEAD box protein retinoblastoma, DBP-RB	0.970811	-0.176154
Q15424	SAFB	Scaffold attachment factor B1, SAF-B, SAF-B1, HSP27 estrogen response element-TATA box-binding protein, HSP27 ERE-TATA-binding protein	0.829906	0.385185
Q99613	EIF3C	Eukaryotic translation initiation factor 3 subunit C, eIF3c, Eukaryotic translation initiation factor 3 subunit 8, eIF3 p110	0.741819	0.298136
O75533	SF3B1	Splicing factor 3B subunit 1, Pre-mRNA-splicing factor SF3b 155 kDa subunit, SF3b155, Spliceosome-associated protein 155, SAP 155	0.916756	-0.0774671
Q5JSZ5	PRRC2B	Protein PRRC2B, HLA-B-associated transcript 2-like 1, Proline-rich coiled-coil protein 2B	1.14512	0.83577
Q6IQ49	SDE2	Splicing regulator SDE2, Replication stress response regulator SDE2	1.39774	0.310209
Q7Z478	DHX29	ATP-dependent RNA helicase DHX29, 3.6.4.13, DEAH box protein 29, Nucleic acid helicase DDXx	1.11448	-0.254087
O43395	PRPF3	U4/U6 small nuclear ribonucleoprotein Prp3, Pre-mRNA-splicing factor 3, hPrp3, U4/U6 snRNP 90 kDa protein	1.15526	-0.419095
Q8WVV9	HNRNPLL	Heterogeneous nuclear ribonucleoprotein L-like, hnRNPLL, Stromal RNA-regulating factor	0.953629	0.856859
Q96SI9	STRBP	Spermatid perinuclear RNA-binding protein	1.0189	0.547319
Q8TB72	PUM2	Pumilio homolog 2, Pumilio-2	0.883345	1.38446
Q9BZE1	MRPL37	39S ribosomal protein L37, mitochondrial, L37mt, MRP-L37, 39S ribosomal protein L2, mitochondrial, L2mt, MRP-L2, Mitochondrial large ribosomal subunit protein mL37	0.877271	0.684653
Q4G0J3	LARP7	La-related protein 7, La ribonucleoprotein domain family member 7, hLARP7, P-TEFb-interaction protein for 7SK stability, PIP7S	0.816101	1.02525
Q14498	RBM39	RNA-binding protein 39, CAPER alpha, CAPERalpha, Hepatocellular carcinoma protein 1, RNA-binding motif protein 39, RNA-binding region-containing protein 2, Splicing factor HCC1	0.805365	0.321497
Q9P2N5	RBM27	RNA-binding protein 27, RNA-binding motif protein 27	1.15163	0.377848
P62854	RPS26	40S ribosomal protein S26, Small ribosomal subunit protein eS26	0.74092	0.0997669
Q9P275	USP36	Ubiquitin carboxyl-terminal hydrolase 36, 3.4.19.12, Deubiquitinating enzyme 36, Ubiquitin thioesterase 36, Ubiquitin-specific-processing protease 36	0.90879	0.394639
O15226	NKRF	NF-kappa-B-repressing factor, NFkB-repressing factor, NRF, Protein ITBA4	0.853206	0.447828
Q53F19	NCBP3	Nuclear cap-binding protein subunit 3, Protein ELG	1.43586	-0.324763
Q9BQ39	DDX50	ATP-dependent RNA helicase DDX50, 3.6.4.13, DEAD box protein 50, Gu-beta, Nucleolar protein Gu2	1.20761	-0.0187215
Q9BYD1	MRPL13	39S ribosomal protein L13, mitochondrial, L13mt, MRP-L13, Mitochondrial large ribosomal subunit protein uL13m	0.803238	0.92929
Q96SB4	SRPK1	SRSF protein kinase 1, 2.7.11.1, SFRS protein kinase 1, Serine/arginine-rich protein-specific kinase 1, SR-protein-specific kinase 1	1.19595	-0.420012
P46013	MKI67	Proliferation marker protein Ki-67, Antigen identified by monoclonal antibody Ki-67, Antigen KI-67, Antigen Ki67	0.723929	0.339714
Q14694	USP10	Ubiquitin carboxyl-terminal hydrolase 10, 3.4.19.12, Deubiquitinating enzyme 10, Ubiquitin thioesterase 10, Ubiquitin-specific-processing protease 10	0.910349	0.515812
Q6PJT7	ZC3H14	Zinc finger CCCH domain-containing protein 14, Mammalian suppressor of tau pathology-2, MSUT-2, Renal carcinoma antigen NY-REN-37	0.994893	0.361185
Q8WU90	ZC3H15	Zinc finger CCCH domain-containing protein 15, DRG family-regulatory protein 1, Likely ortholog of mouse immediate early response erythropoietin 4	1.22862	-0.314577
Q86TB9	PATL1	Protein PAT1 homolog 1, PAT1-like protein 1, Protein PAT1 homolog b, Pat1b, hPat1b	1.20699	0.539958
P61313	RPL15	60S ribosomal protein L15, Large ribosomal subunit protein eL15	0.964432	-0.963303
Q8WWY3	PRPF31	U4/U6 small nuclear ribonucleoprotein Prp31, Pre-mRNA-processing factor 31, Serologically defined breast cancer antigen NY-BR-99, U4/U6 snRNP 61 kDa protein, Protein 61K, hPrp31	1.08852	0.0407143
O43670	ZNF207	BUB3-interacting and GLEBS motif-containing protein ZNF207, BuGZ, hBuGZ, Zinc finger protein 207	1.24422	-0.337402
O75494	SRSF10	Serine/arginine-rich splicing factor 10, 40 kDa SR-repressor protein, SRrp40, FUS-interacting serine-arginine-rich protein 1, Splicing factor SRp38, Splicing factor, arginine/serine-rich 13A, TLS-associated protein with Ser-Arg repeats, TASR, TLS-associated protein with SR repeats, TLS-associated serine-arginine protein, TLS-associated SR protein	0.811757	0.567957
Q71RC2	LARP4	La-related protein 4, La ribonucleoprotein domain family member 4	0.787548	0.537857
Q9BVI4	NOC4L	Nucleolar complex protein 4 homolog, NOC4 protein homolog, NOC4-like protein, Nucleolar complex-associated protein 4-like protein	1.42608	-0.383212
Q9NRW3	APOBEC3C	DNA dC->dU-editing enzyme APOBEC-3C, A3C, 3.5.4.38, APOBEC1-like, Phorbolin I	1.24308	0.367476
Q9NUL3	STAU2	Double-stranded RNA-binding protein Staufen homolog 2	0.945078	0.798302
Q8IWX8	CHERP	Calcium homeostasis endoplasmic reticulum protein, ERPROT 213-21, SR-related CTD-associated factor 6	0.903861	-0.0180408
Q15061	WDR43	WD repeat-containing protein 43, U3 small nucleolar RNA-associated protein 5 homolog	0.982009	-0.137931
Q9NRX1	PNO1	RNA-binding protein PNO1, Partner of NOB1	1.33014	-0.400475
Q92667	AKAP1	A-kinase anchor protein 1, mitochondrial, A-kinase anchor protein 149 kDa, AKAP 149, Dual specificity A-kinase-anchoring protein 1, D-AKAP-1, Protein kinase A-anchoring protein 1, PRKA1, Spermatid A-kinase anchor protein 84, S-AKAP84	1.50316	0.445428
O43823	AKAP8	A-kinase anchor protein 8, AKAP-8, A-kinase anchor protein 95 kDa, AKAP 95	0.847395	0.839093
Q96PZ0	PUS7	Pseudouridylate synthase 7 homolog, 5.4.99.-	1.11496	-0.212179
Q9UHB9	SRP68	Signal recognition particle subunit SRP68, SRP68, Signal recognition particle 68 kDa protein	0.938162	0.0416295
Q92979	EMG1	Ribosomal RNA small subunit methyltransferase NEP1, 2.1.1.-, 18S rRNA (pseudouridine(1248)-N1)-methyltransferase, 18S rRNA Psi1248 methyltransferase, Nucleolar protein EMG1 homolog, Protein C2f, Ribosome biogenesis protein NEP1	1.16067	-0.669283
Q9H6R4	NOL6	Nucleolar protein 6, Nucleolar RNA-associated protein, Nrap	0.973431	-0.194648
Q15691	MAPRE1	Microtubule-associated protein RP/EB family member 1, APC-binding protein EB1, End-binding protein 1, EB1	1.35104	-0.739255
O95985	TOP3B	DNA topoisomerase 3-beta-1, 5.6.2.1, DNA topoisomerase III beta-1	0.982396	0.735672
P61956	SUMO2	Small ubiquitin-related modifier 2, SUMO-2, HSMT3, SMT3 homolog 2, SUMO-3, Sentrin-2, Ubiquitin-like protein SMT3B, Smt3B	0.963203	-0.447417
P55010	EIF5	Eukaryotic translation initiation factor 5, eIF-5	1.23083	-0.737703
Q5JTH9	RRP12	RRP12-like protein	0.723171	0.416729
Q09666	AHNAK	Neuroblast differentiation-associated protein AHNAK, Desmoyokin	0.739596	-0.135783
Q9BUL9	RPP25	Ribonuclease P protein subunit p25, RNase P protein subunit p25	1.18866	0.697002
Q9NXH9	TRMT1	tRNA (guanine(26)-N(2))-dimethyltransferase, 2.1.1.216, tRNA 2,2-dimethylguanosine-26 methyltransferase, tRNA(guanine-26,N(2)-N(2)) methyltransferase, tRNA(m(2,2)G26)dimethyltransferase	0.988118	0.0446353
Q9Y3A4	RRP7A	Ribosomal RNA-processing protein 7 homolog A, Gastric cancer antigen Zg14	1.1526	0.141396
Q9NV31	IMP3	U3 small nucleolar ribonucleoprotein protein IMP3, U3 snoRNP protein IMP3, BRMS2	1.20751	0.195279
Q99700	ATXN2	Ataxin-2, Spinocerebellar ataxia type 2 protein, Trinucleotide repeat-containing gene 13 protein	1.0315	0.419559
Q96D46	NMD3	60S ribosomal export protein NMD3, hNMD3	0.988776	-0.068289
P42285	MTREX	Exosome RNA helicase MTR4, 3.6.4.13, ATP-dependent RNA helicase DOB1, ATP-dependent RNA helicase SKIV2L2, Superkiller viralicidic activity 2-like 2, TRAMP-like complex helicase	0.973727	-0.299052
Q9UNX4	WDR3	WD repeat-containing protein 3	1.0433	-0.194811
Q9H0J9	PARP12	Protein mono-ADP-ribosyltransferase PARP12, 2.4.2.-, ADP-ribosyltransferase diphtheria toxin-like 12, ARTD12, Poly [ADP-ribose] polymerase 12, PARP-12, Zinc finger CCCH domain-containing protein 1	0.816274	0.9239
Q9BYG3	NIFK	MKI67 FHA domain-interacting nucleolar phosphoprotein, Nucleolar phosphoprotein Nopp34, Nucleolar protein interacting with the FHA domain of pKI-67, hNIFK	0.891846	0.010868
Q9H2Y7	ZNF106	Zinc finger protein 106, Zfp-106, Zinc finger protein 474	1.55116	0.343663
Q9BYD6	MRPL1	39S ribosomal protein L1, mitochondrial, L1mt, MRP-L1, Mitochondrial large ribosomal subunit protein uL1m	1.13386	0.250032
Q15029	EFTUD2	116 kDa U5 small nuclear ribonucleoprotein component, Elongation factor Tu GTP-binding domain-containing protein 2, SNU114 homolog, hSNU114, U5 snRNP-specific protein, 116 kDa, U5-116 kDa	0.662889	0.160317
Q8IUH3	RBM45	RNA-binding protein 45, Developmentally-regulated RNA-binding protein 1, RB-1, RNA-binding motif protein 45	0.907318	0.997222
Q9NYF8	BCLAF1	Bcl-2-associated transcription factor 1, Btf, BCLAF1 and THRAP3 family member 1	0.697064	0.453038
Q9BRU9	UTP23	rRNA-processing protein UTP23 homolog	1.428	0.230014
Q9Y4P3	TBL2	Transducin beta-like protein 2, WS beta-transducin repeats protein, WS-betaTRP, Williams-Beuren syndrome chromosomal region 13 protein	1.10957	-0.144533
P26038	MSN	Moesin, Membrane-organizing extension spike protein	0.792514	-1.04432
Q16630	CPSF6	Cleavage and polyadenylation specificity factor subunit 6, Cleavage and polyadenylation specificity factor 68 kDa subunit, CPSF 68 kDa subunit, Cleavage factor Im complex 68 kDa subunit, CFIm68, Pre-mRNA cleavage factor Im 68 kDa subunit, Protein HPBRII-4/7	0.927725	0.0918527
Q14151	SAFB2	Scaffold attachment factor B2, SAF-B2	0.784757	0.501251
Q6Y7W6	GIGYF2	GRB10-interacting GYF protein 2, PERQ amino acid-rich with GYF domain-containing protein 2, Trinucleotide repeat-containing gene 15 protein	0.877719	0.370552
P82675	MRPS5	28S ribosomal protein S5, mitochondrial, MRP-S5, S5mt, Mitochondrial small ribosomal subunit protein uS5m	0.812444	0.190218
Q9BXP5	SRRT	Serrate RNA effector molecule homolog, Arsenite-resistance protein 2	0.82796	-0.128817
Q9UH17	APOBEC3B	DNA dC->dU-editing enzyme APOBEC-3B, A3B, 3.5.4.38, Phorbolin-1-related protein, Phorbolin-2/3	0.969483	0.574827
Q86XZ4	SPATS2	Spermatogenesis-associated serine-rich protein 2, Serine-rich spermatocytes and round spermatid 59 kDa protein, p59scr	1.16367	0.414737
P26196	DDX6	Probable ATP-dependent RNA helicase DDX6, 3.6.4.13, ATP-dependent RNA helicase p54, DEAD box protein 6, Oncogene RCK	0.92763	-0.342777
Q5T8P6	RBM26	RNA-binding protein 26, CTCL tumor antigen se70-2, RNA-binding motif protein 26	0.839915	0.162561
Q9Y2X3	NOP58	Nucleolar protein 58, Nucleolar protein 5	0.73351	-0.0529517
Q6NZY4	ZCCHC8	Zinc finger CCHC domain-containing protein 8, TRAMP-like complex RNA-binding factor ZCCHC8	1.12566	0.780578
Q5QJE6	DNTTIP2	Deoxynucleotidyltransferase terminal-interacting protein 2, Estrogen receptor-binding protein, LPTS-interacting protein 2, LPTS-RP2, Terminal deoxynucleotidyltransferase-interacting factor 2, TdIF2, TdT-interacting factor 2	0.857821	-0.0240302
Q14258	TRIM25	E3 ubiquitin/ISG15 ligase TRIM25, 6.3.2.n3, Estrogen-responsive finger protein, RING finger protein 147, RING-type E3 ubiquitin transferase, 2.3.2.27, RING-type E3 ubiquitin transferase TRIM25, Tripartite motif-containing protein 25, Ubiquitin/ISG15-conjugating enzyme TRIM25, Zinc finger protein 147	0.707407	0.242975
Q9NQZ2	UTP3	Something about silencing protein 10, Charged amino acid-rich leucine zipper 1, CRL1, Disrupter of silencing SAS10, UTP3 homolog	1.05895	-0.140084
Q92552	MRPS27	28S ribosomal protein S27, mitochondrial, MRP-S27, S27mt, Mitochondrial ribosomal protein S27, Mitochondrial small ribosomal subunit protein mS27	0.608896	0.161252
Q8IY81	FTSJ3	pre-rRNA 2'-O-ribose RNA methyltransferase FTSJ3, 2.1.1.-, Protein ftsJ homolog 3, Putative rRNA methyltransferase 3	0.702909	0.156079
Q9H6S0	YTHDC2	3'-5' RNA helicase YTHDC2, 3.6.4.13, YTH domain-containing protein 2, hYTHDC2	0.737474	0.551706
P62906	RPL10A	60S ribosomal protein L10a, CSA-19, Large ribosomal subunit protein uL1, Neural precursor cell expressed developmentally down-regulated protein 6, NEDD-6	0.866397	-1.32299
Q96T37	RBM15	RNA-binding protein 15, One-twenty two protein 1, RNA-binding motif protein 15	0.596463	1.18163
P60842	EIF4A1	Eukaryotic initiation factor 4A-I, eIF-4A-I, eIF4A-I, 3.6.4.13, ATP-dependent RNA helicase eIF4A-1	0.644416	-0.842347
Q14684	RRP1B	Ribosomal RNA processing protein 1 homolog B, RRP1-like protein B	0.696008	0.138631
Q8TBF4	ZCRB1	Zinc finger CCHC-type and RNA-binding motif-containing protein 1, U11/U12 small nuclear ribonucleoprotein 31 kDa protein, U11/U12 snRNP 31 kDa protein, U11/U12-31K	0.981638	0.304285
P62826	RAN	GTP-binding nuclear protein Ran, 3.6.5.-, Androgen receptor-associated protein 24, GTPase Ran, Ras-like protein TC4, Ras-related nuclear protein	0.72846	-1.24566
Q969X6	UTP4	U3 small nucleolar RNA-associated protein 4 homolog, Cirhin, UTP4 small subunit processome component	0.831597	-0.160612
Q9H6R0	DHX33	ATP-dependent RNA helicase DHX33, 3.6.4.13, DEAH box protein 33	1.05024	-0.122026
Q8IZH2	XRN1	5'-3' exoribonuclease 1, 3.1.13.-, Strand-exchange protein 1 homolog	1.05159	-0.16951
P62829	RPL23	60S ribosomal protein L23, 60S ribosomal protein L17, Large ribosomal subunit protein uL14	0.686206	-0.722047
Q8IY37	DHX37	Probable ATP-dependent RNA helicase DHX37, 3.6.4.13, DEAH box protein 37	0.931213	0.167737
Q13838	DDX39B	Spliceosome RNA helicase DDX39B, 3.6.4.13, 56 kDa U2AF65-associated protein, ATP-dependent RNA helicase p47, DEAD box protein UAP56, HLA-B-associated transcript 1 protein	0.849642	-1.00776
Q9BRZ2	TRIM56	E3 ubiquitin-protein ligase TRIM56, 2.3.2.27, RING finger protein 109, Tripartite motif-containing protein 56	1.50347	0.6032
Q9P015	MRPL15	39S ribosomal protein L15, mitochondrial, L15mt, MRP-L15, Mitochondrial large ribosomal subunit protein uL15m	0.830816	0.15775
Q9BWF3	RBM4	RNA-binding protein 4, Lark homolog, hLark, RNA-binding motif protein 4, RNA-binding motif protein 4a	0.575515	0.822567
Q9H6T0	ESRP2	Epithelial splicing regulatory protein 2, RNA-binding motif protein 35B, RNA-binding protein 35B	0.655716	1.11316
O43809	NUDT21	Cleavage and polyadenylation specificity factor subunit 5, Cleavage and polyadenylation specificity factor 25 kDa subunit, CPSF 25 kDa subunit, Cleavage factor Im complex 25 kDa subunit, CFIm25, Nucleoside diphosphate-linked moiety X motif 21, Nudix motif 21, Nudix hydrolase 21, Pre-mRNA cleavage factor Im 68 kDa subunit	0.923661	-0.224498
Q9HC36	MRM3	rRNA methyltransferase 3, mitochondrial, 2.1.1.-, 16S rRNA (guanosine(1370)-2'-O)-methyltransferase, 16S rRNA [Gm1370] 2'-O-methyltransferase, RNA methyltransferase-like protein 1	0.905586	0.120087
Q9UGP8	SEC63	Translocation protein SEC63 homolog	0.879938	-0.173007
Q9UBU9	NXF1	Nuclear RNA export factor 1, Tip-associated protein, Tip-associating protein, mRNA export factor TAP	0.975434	-0.0797494
P05198	EIF2S1	Eukaryotic translation initiation factor 2 subunit 1, Eukaryotic translation initiation factor 2 subunit alpha, eIF-2-alpha, eIF-2A, eIF-2alpha	0.759082	-0.459303
Q9BXJ9	NAA15	N-alpha-acetyltransferase 15, NatA auxiliary subunit, Gastric cancer antigen Ga19, N-terminal acetyltransferase, NMDA receptor-regulated protein 1, Protein tubedown-1, Tbdn100	0.756428	-0.353395
Q8IYB7	DIS3L2	DIS3-like exonuclease 2, hDIS3L2, 3.1.13.-	0.985744	-0.162731
Q15459	SF3A1	Splicing factor 3A subunit 1, SF3a120, Spliceosome-associated protein 114, SAP 114	0.61211	0.17078
Q7Z6E9	RBBP6	E3 ubiquitin-protein ligase RBBP6, 2.3.2.27, Proliferation potential-related protein, Protein P2P-R, RING-type E3 ubiquitin transferase RBBP6, Retinoblastoma-binding Q protein 1, RBQ-1, Retinoblastoma-binding protein 6, p53-associated cellular protein of testis	0.946006	0.0618295
Q07955	SRSF1	Serine/arginine-rich splicing factor 1, Alternative-splicing factor 1, ASF-1, Splicing factor, arginine/serine-rich 1, pre-mRNA-splicing factor SF2, P33 subunit	0.559939	0.212368
Q9H0S4	DDX47	Probable ATP-dependent RNA helicase DDX47, 3.6.4.13, DEAD box protein 47	0.90378	-0.530948
P09001	MRPL3	39S ribosomal protein L3, mitochondrial, L3mt, MRP-L3, Mitochondrial large ribosomal subunit protein uL3m	0.739763	0.315436
Q9BY44	EIF2A	Eukaryotic translation initiation factor 2A, eIF-2A, 65 kDa eukaryotic translation initiation factor 2A	0.763596	-0.421933
Q9Y2W1	THRAP3	Thyroid hormone receptor-associated protein 3, BCLAF1 and THRAP3 family member 2, Thyroid hormone receptor-associated protein complex 150 kDa component, Trap150	0.57396	0.430333
Q01081	U2AF1	Splicing factor U2AF 35 kDa subunit, U2 auxiliary factor 35 kDa subunit, U2 small nuclear RNA auxiliary factor 1, U2 snRNP auxiliary factor small subunit	0.750689	-0.11132
Q9H9Y2	RPF1	Ribosome production factor 1, Brix domain-containing protein 5, Ribosome biogenesis protein RPF1	0.868443	0.1249
Q7KZ85	SUPT6H	Transcription elongation factor SPT6, hSPT6, Histone chaperone suppressor of Ty6, Tat-cotransactivator 2 protein, Tat-CT2 protein	0.735785	0.225931
Q04637	EIF4G1	Eukaryotic translation initiation factor 4 gamma 1, eIF-4-gamma 1, eIF-4G 1, eIF-4G1, p220	0.603501	-0.250905
P62851	RPS25	40S ribosomal protein S25, Small ribosomal subunit protein eS25	0.754743	-1.18809
P50579	METAP2	Methionine aminopeptidase 2, MAP 2, MetAP 2, 3.4.11.18, Initiation factor 2-associated 67 kDa glycoprotein, p67, p67eIF2, Peptidase M	0.790844	-0.357447
Q5F1R6	DNAJC21	DnaJ homolog subfamily C member 21, DnaJ homolog subfamily A member 5, Protein GS3	1.23882	-0.251797
O75683	SURF6	Surfeit locus protein 6	0.768963	0.0976015
Q9BRL6	SRSF8	Serine/arginine-rich splicing factor 8, Pre-mRNA-splicing factor SRP46, Splicing factor SRp46, Splicing factor, arginine/serine-rich 2B	0.90709	1.04469
Q7L2E3	DHX30	ATP-dependent RNA helicase DHX30, 3.6.4.13, DEAH box protein 30	0.530682	0.480256
Q9P258	RCC2	Protein RCC2, RCC1-like protein TD-60, Telophase disk protein of 60 kDa	0.845195	-0.937542
P18621	RPL17	60S ribosomal protein L17, 60S ribosomal protein L23, Large ribosomal subunit protein uL22, PD-1	0.606269	-0.525063
P38919	EIF4A3	Eukaryotic initiation factor 4A-III, eIF-4A-III, eIF4A-III, 3.6.4.13, ATP-dependent RNA helicase DDX48, ATP-dependent RNA helicase eIF4A-3, DEAD box protein 48, Eukaryotic initiation factor 4A-like NUK-34, Eukaryotic translation initiation factor 4A isoform 3, Nuclear matrix protein 265, NMP 265, hNMP 265	0.736514	-0.936516
P78345	RPP38	Ribonuclease P protein subunit p38, RNaseP protein p38	1.22172	0.0119427
P13639	EEF2	Elongation factor 2, EF-2	0.496914	-0.753756
O00442	RTCA	RNA 3'-terminal phosphate cyclase, RNA cyclase, RNA-3'-phosphate cyclase, 6.5.1.4, RNA terminal phosphate cyclase domain-containing protein 1, RTC domain-containing protein 1	0.779488	-0.0260499
O43148	RNMT	mRNA cap guanine-N7 methyltransferase, 2.1.1.56, RG7MT1, mRNA (guanine-N(7))-methyltransferase, mRNA cap methyltransferase, hCMT1, hMet, hcm1p	1.07433	-0.0948973
Q9C0J8	WDR33	pre-mRNA 3' end processing protein WDR33, WD repeat-containing protein 33, WD repeat-containing protein of 146 kDa	0.693303	0.484786
Q9NUQ6	SPATS2L	SPATS2-like protein, DNA polymerase-transactivated protein 6, Stress granule and nucleolar protein, SGNP	0.794108	0.603421
Q13435	SF3B2	Splicing factor 3B subunit 2, Pre-mRNA-splicing factor SF3b 145 kDa subunit, SF3b145, Spliceosome-associated protein 145, SAP 145	0.701193	-0.274535
Q9P2E9	RRBP1	Ribosome-binding protein 1, 180 kDa ribosome receptor homolog, RRp, ES/130-related protein, Ribosome receptor protein	0.724609	-0.116801
Q9BQ75	CMSS1	Protein CMSS1, Cms1 ribosomal small subunit homolog	1.37681	-0.790037
Q86UP2	KTN1	Kinectin, CG-1 antigen, Kinesin receptor	0.746687	-0.301472
Q9NYY8	FASTKD2	FAST kinase domain-containing protein 2, mitochondrial	0.74046	0.257657
Q9BZI7	UPF3B	Regulator of nonsense transcripts 3B, Nonsense mRNA reducing factor 3B, Up-frameshift suppressor 3 homolog B, hUpf3B, Up-frameshift suppressor 3 homolog on chromosome X, hUpf3p-X	1.30791	-0.0275123
Q86UK7	ZNF598	E3 ubiquitin-protein ligase ZNF598, 2.3.2.27, Zinc finger protein 598	0.904049	0.158987
Q9NXG2	THUMPD1	THUMP domain-containing protein 1	1.22833	-0.377745
O95900	TRUB2	Pseudouridylate synthase TRUB2, mitochondrial, 5.4.99.-, TruB pseudouridine synthase homolog 2, tRNA pseudouridine 55 synthase TRUB2, Psi55 synthase TRUB2, 5.4.99.25	0.837998	0.726894
Q9UHI6	DDX20	Probable ATP-dependent RNA helicase DDX20, 3.6.1.15, 3.6.4.13, Component of gems 3, DEAD box protein 20, DEAD box protein DP 103, Gemin-3	0.850442	-0.472318
Q9BRJ2	MRPL45	39S ribosomal protein L45, mitochondrial, L45mt, MRP-L45, Mitochondrial large ribosomal subunit protein mL45	0.655263	0.0907017
Q8N726	CDKN2A	Tumor suppressor ARF, Alternative reading frame, ARF, Cyclin-dependent kinase inhibitor 2A, p14ARF	1.03979	-0.384694
Q9Y6M1	IGF2BP2	Insulin-like growth factor 2 mRNA-binding protein 2, IGF2 mRNA-binding protein 2, IMP-2, Hepatocellular carcinoma autoantigen p62, IGF-II mRNA-binding protein 2, VICKZ family member 2	0.866888	1.10975
Q9UKV8	AGO2	Protein argonaute-2, Argonaute2, hAgo2, 3.1.26.n2, Argonaute RISC catalytic component 2, Eukaryotic translation initiation factor 2C 2, eIF-2C 2, eIF2C 2, PAZ Piwi domain protein, PPD, Protein slicer	0.769501	0.276257
O00267	SUPT5H	Transcription elongation factor SPT5, hSPT5, DRB sensitivity-inducing factor 160 kDa subunit, DSIF p160, DRB sensitivity-inducing factor large subunit, DSIF large subunit, Tat-cotransactivator 1 protein, Tat-CT1 protein	0.636649	-0.0116605
Q9H7E2	TDRD3	Tudor domain-containing protein 3	0.931694	0.678115
Q8N9T8	KRI1	Protein KRI1 homolog	0.860604	-0.35238
Q15020	SART3	Squamous cell carcinoma antigen recognized by T-cells 3, SART-3, Tat-interacting protein of 110 kDa, Tip110, p110 nuclear RNA-binding protein	0.583844	0.314851
Q9HAV4	XPO5	Exportin-5, Exp5, Ran-binding protein 21	0.691979	-0.29337
Q9NVP1	DDX18	ATP-dependent RNA helicase DDX18, 3.6.4.13, DEAD box protein 18, Myc-regulated DEAD box protein, MrDb	0.593007	-0.0372563
Q7Z2W9	MRPL21	39S ribosomal protein L21, mitochondrial, L21mt, MRP-L21, Mitochondrial large ribosomal subunit protein bL21m	1.02102	-0.431859
P62244	RPS15A	40S ribosomal protein S15a, Small ribosomal subunit protein uS8	0.626826	-1.1708
Q7L1Q6	BZW1	eIF5-mimic protein 2, Basic leucine zipper and W2 domain-containing protein 1, Protein Orf	0.639337	-0.697992
Q9UPY3	DICER1	Endoribonuclease Dicer, 3.1.26.3, Helicase with RNase motif, Helicase MOI	1.12269	0.570013
Q53EL6	PDCD4	Programmed cell death protein 4, Neoplastic transformation inhibitor protein, Nuclear antigen H731-like, Protein 197/15a	0.862511	-0.475607
P55769	SNU13	NHP2-like protein 1, High mobility group-like nuclear protein 2 homolog 1, OTK27, SNU13 homolog, hSNU13, U4/U6.U5 small nuclear ribonucleoprotein SNU13, U4/U6.U5 tri-snRNP 15.5 kDa protein	1.04395	-1.1916
Q93062	RBPMS	RNA-binding protein with multiple splicing, RBP-MS, Heart and RRM expressed sequence, Hermes	1.1831	1.16241
Q9BZZ5	API5	Apoptosis inhibitor 5, API-5, Antiapoptosis clone 11 protein, AAC-11, Cell migration-inducing gene 8 protein, Fibroblast growth factor 2-interacting factor, FIF, Protein XAGL	0.681871	-0.058398
P09874	PARP1	Poly [ADP-ribose] polymerase, 2.4.2.30	0.578561	-0.689837
P62701	RPS4X	40S ribosomal protein S4, X isoform, SCR10, Single copy abundant mRNA protein, Small ribosomal subunit protein eS4	0.507443	-0.938189
P46779	RPL28	60S ribosomal protein L28, Large ribosomal subunit protein eL28	0.707967	-1.22749
O43818	RRP9	U3 small nucleolar RNA-interacting protein 2, RRP9 homolog, U3 small nucleolar ribonucleoprotein-associated 55 kDa protein, U3 snoRNP-associated 55 kDa protein, U3-55K	0.927237	-0.860598
O75616	ERAL1	GTPase Era, mitochondrial, H-ERA, hERA, Conserved ERA-like GTPase, CEGA, ERA-W, ERA-like protein 1	0.611907	0.307298
Q13601	KRR1	KRR1 small subunit processome component homolog, HIV-1 Rev-binding protein 2, KRR-R motif-containing protein 1, Rev-interacting protein 1, Rip-1	0.622648	0.0884293
Q9P2E3	ZNFX1	NFX1-type zinc finger-containing protein 1	0.569492	0.693428
P30101	PDIA3	Protein disulfide-isomerase A3, 5.3.4.1, 58 kDa glucose-regulated protein, 58 kDa microsomal protein, p58, Disulfide isomerase ER-60, Endoplasmic reticulum resident protein 57, ER protein 57, ERp57, Endoplasmic reticulum resident protein 60, ER protein 60, ERp60	0.617451	-1.47723
Q9NYH9	UTP6	U3 small nucleolar RNA-associated protein 6 homolog, Hepatocellular carcinoma-associated antigen 66, Multiple hat domains protein	0.932492	-0.73875
Q9NX05	FAM120C	Constitutive coactivator of PPAR-gamma-like protein 2, Protein FAM120C, Tumor antigen BJ-HCC-21	0.969783	0.197322
P82914	MRPS15	28S ribosomal protein S15, mitochondrial, MRP-S15, S15mt, Mitochondrial small ribosomal subunit protein uS15m	0.804398	0.163012
Q9Y4W2	LAS1L	Ribosomal biogenesis protein LAS1L, Protein LAS1 homolog	0.913966	-0.616085
Q9BYD3	MRPL4	39S ribosomal protein L4, mitochondrial, L4mt, MRP-L4, Mitochondrial large ribosomal subunit protein uL4m	0.634143	0.27802
Q99543	DNAJC2	DnaJ homolog subfamily C member 2, M-phase phosphoprotein 11, Zuotin-related factor 1	0.768501	-0.389763
Q9Y3T9	NOC2L	Nucleolar complex protein 2 homolog, Protein NOC2 homolog, NOC2-like protein, Novel INHAT repressor	0.690306	-0.599578
Q96I51	RCC1L	RCC1-like G exchanging factor-like protein, RCC1-like, Williams-Beuren syndrome chromosomal region 16 protein	0.633854	0.352573
P30876	POLR2B	DNA-directed RNA polymerase II subunit RPB2, 2.7.7.6, DNA-directed RNA polymerase II 140 kDa polypeptide, DNA-directed RNA polymerase II subunit B, RNA polymerase II subunit 2, RNA polymerase II subunit B2	0.535859	-0.00753899
Q7RTV0	PHF5A	PHD finger-like domain-containing protein 5A, PHD finger-like domain protein 5A, Splicing factor 3B-associated 14 kDa protein, SF3b14b	0.658127	-0.425515
O76094	SRP72	Signal recognition particle subunit SRP72, SRP72, Signal recognition particle 72 kDa protein	0.565729	0.238779
Q9NYL2	MAP3K20	Mitogen-activated protein kinase kinase kinase 20, 2.7.11.25, Human cervical cancer suppressor gene 4 protein, HCCS-4, Leucine zipper- and sterile alpha motif-containing kinase, MLK-like mitogen-activated protein triple kinase, Mitogen-activated protein kinase kinase kinase MLT, Mixed lineage kinase 7, Mixed lineage kinase-related kinase, MLK-related kinase, MRK, Sterile alpha motif- and leucine …	0.689239	0.529237
P56182	RRP1	Ribosomal RNA processing protein 1 homolog A, Novel nuclear protein 1, NNP-1, Nucleolar protein Nop52, RRP1-like protein	0.661786	-0.203464
Q14157	UBAP2L	Ubiquitin-associated protein 2-like, Protein NICE-4, RNA polymerase II degradation factor UBAP2L	0.436	0.377711
Q15428	SF3A2	Splicing factor 3A subunit 2, SF3a66, Spliceosome-associated protein 62, SAP 62	0.691731	-0.546095
P62857	RPS28	40S ribosomal protein S28, Small ribosomal subunit protein eS28	0.719039	-1.26633
Q9BTC0	DIDO1	Death-inducer obliterator 1, DIO-1, hDido1, Death-associated transcription factor 1, DATF-1	0.825199	-0.042872
Q9Y2R9	MRPS7	28S ribosomal protein S7, mitochondrial, MRP-S7, S7mt, Mitochondrial small ribosomal subunit protein uS7m, bMRP-27a, bMRP27a	0.630052	0.0537023
P62314	SNRPD1	Small nuclear ribonucleoprotein Sm D1, Sm-D1, Sm-D autoantigen, snRNP core protein D1	0.63253	-0.531964
Q8TEQ6	GEMIN5	Gem-associated protein 5, Gemin5	0.525594	-0.294271
Q8NDF8	TENT4B	Terminal nucleotidyltransferase 4B, Non-canonical poly(A) RNA polymerase PAPD5, 2.7.7.19, PAP-associated domain-containing protein 5, Terminal guanylyltransferase, 2.7.7.-, Terminal uridylyltransferase 3, TUTase 3, Topoisomerase-related function protein 4-2, TRF4-2	0.899532	0.442185
Q9BZJ0	CRNKL1	Crooked neck-like protein 1, Crooked neck homolog, hCrn	1.21748	-0.483874
Q9BYJ9	YTHDF1	YTH domain-containing family protein 1, DF1, Dermatomyositis associated with cancer putative autoantigen 1, DACA-1	0.688058	1.01649
P07237	P4HB	Protein disulfide-isomerase, PDI, 5.3.4.1, Cellular thyroid hormone-binding protein, Prolyl 4-hydroxylase subunit beta, p55	0.614446	-1.39258
Q969Z0	TBRG4	FAST kinase domain-containing protein 4, Cell cycle progression restoration protein 2, Cell cycle progression protein 2, Protein TBRG4, Transforming growth factor beta regulator 4	0.534019	0.0342034
Q8NEY8	PPHLN1	Periphilin-1, CDC7 expression repressor, CR, Gastric cancer antigen Ga50	0.647352	-0.0225636
Q96QD9	FYTTD1	UAP56-interacting factor, Forty-two-three domain-containing protein 1, Protein 40-2-3	1.06161	0.467046
O60524	NEMF	Ribosome quality control complex subunit NEMF, Antigen NY-CO-1, Nuclear export mediator factor, Serologically defined colon cancer antigen 1	0.591608	0.214855
Q96G21	IMP4	U3 small nucleolar ribonucleoprotein protein IMP4, U3 snoRNP protein IMP4, Brix domain-containing protein 4	0.669042	-0.136005
Q9Y3F4	STRAP	Serine-threonine kinase receptor-associated protein, MAP activator with WD repeats, UNR-interacting protein, WD-40 repeat protein PT-WD	0.603743	-0.96537
Q14978	NOLC1	Nucleolar and coiled-body phosphoprotein 1, 140 kDa nucleolar phosphoprotein, Nopp140, Hepatitis C virus NS5A-transactivated protein 13, HCV NS5A-transactivated protein 13, Nucleolar 130 kDa protein, Nucleolar phosphoprotein p130	0.450089	-0.736392
Q9BRT6	LLPH	Protein LLP homolog, Protein LAPS18-like	0.663135	-0.195518
Q69YN4	VIRMA	Protein virilizer homolog	0.874002	-0.0618811
P08621	SNRNP70	U1 small nuclear ribonucleoprotein 70 kDa, U1 snRNP 70 kDa, U1-70K, snRNP70	0.371427	0.264741
P20810	CAST	Calpastatin, Calpain inhibitor, Sperm BS-17 component	0.735248	-0.890897
P26639	TARS1	Threonine--tRNA ligase 1, cytoplasmic, 6.1.1.3, Threonyl-tRNA synthetase, ThrRS, Threonyl-tRNA synthetase 1	0.543245	-1.40932
P08240	SRPRA	Signal recognition particle receptor subunit alpha, SR-alpha, Docking protein alpha, DP-alpha	0.583501	-0.572675
Q8N3C0	ASCC3	Activating signal cointegrator 1 complex subunit 3, 3.6.4.12, ASC-1 complex subunit p200, ASC1p200, Helicase, ATP binding 1, Trip4 complex subunit p200	0.529636	0.296112
Q8NHQ9	DDX55	ATP-dependent RNA helicase DDX55, 3.6.4.13, DEAD box protein 55	0.624042	0.210171
P04843	RPN1	Dolichyl-diphosphooligosaccharide--protein glycosyltransferase subunit 1, Dolichyl-diphosphooligosaccharide--protein glycosyltransferase 67 kDa subunit, Ribophorin I, RPN-I, Ribophorin-1	0.520967	-0.951518
Q8N684	CPSF7	Cleavage and polyadenylation specificity factor subunit 7, Cleavage and polyadenylation specificity factor 59 kDa subunit, CPSF 59 kDa subunit, Cleavage factor Im complex 59 kDa subunit, CFIm59, Pre-mRNA cleavage factor Im 59 kDa subunit	0.599418	-0.533656
Q92973	TNPO1	Transportin-1, Importin beta-2, Karyopherin beta-2, M9 region interaction protein, MIP	0.4852	-0.636794
Q14683	SMC1A	Structural maintenance of chromosomes protein 1A, SMC protein 1A, SMC-1-alpha, SMC-1A, Sb1.8	0.377558	0.015327
O75369	FLNB	Filamin-B, FLN-B, ABP-278, ABP-280 homolog, Actin-binding-like protein, Beta-filamin, Filamin homolog 1, Fh1, Filamin-3, Thyroid autoantigen, Truncated actin-binding protein, Truncated ABP	0.263115	0.0300541
P05388	RPLP0	60S acidic ribosomal protein P0, 60S ribosomal protein L10E, Large ribosomal subunit protein uL10	0.535123	-1.44775
Q9HAU5	UPF2	Regulator of nonsense transcripts 2, Up-frameshift suppressor 2 homolog, hUpf2	0.647258	-0.290991
Q96IZ5	RBM41	RNA-binding protein 41, RNA-binding motif protein 41	0.610789	0.980042
P20042	EIF2S2	Eukaryotic translation initiation factor 2 subunit 2, Eukaryotic translation initiation factor 2 subunit beta, eIF-2-beta	0.570058	-1.14889
Q96DH6	MSI2	RNA-binding protein Musashi homolog 2, Musashi-2	0.510353	0.73574
Q9NVV4	MTPAP	Poly(A) RNA polymerase, mitochondrial, PAP, 2.7.7.19, PAP-associated domain-containing protein 1, Polynucleotide adenylyltransferase, Terminal uridylyltransferase 1, TUTase 1, mtPAP	0.585644	-0.167165
Q9Y6K5	OAS3	2'-5'-oligoadenylate synthase 3, (2-5')oligo(A) synthase 3, 2-5A synthase 3, 2.7.7.84, p100 OAS, p100OAS	0.691028	0.0520113
Q9NP92	MRPS30	39S ribosomal protein S30, mitochondrial, MRP-S30, S30mt, Mitochondrial large ribosomal subunit protein mL65, Mitochondrial large ribosomal subunit protein mS30, Programmed cell death protein 9	0.640674	-0.0982359
P55081	MFAP1	Microfibrillar-associated protein 1, Spliceosome B complex protein MFAP1	0.483024	-0.0958158
Q9Y2R4	DDX52	Probable ATP-dependent RNA helicase DDX52, 3.6.4.13, ATP-dependent RNA helicase ROK1-like, DEAD box protein 52	0.489468	0.00427443
Q5TC82	RC3H1	Roquin-1, Roquin, 2.3.2.27, RING finger and C3H zinc finger protein 1, RING finger and CCCH-type zinc finger domain-containing protein 1, RING finger protein 198	0.551987	0.366916
Q6IN84	MRM1	rRNA methyltransferase 1, mitochondrial, 2.1.1.-, 16S rRNA (guanosine(1145)-2'-O)-methyltransferase, 16S rRNA [Gm1145] 2'-O-methyltransferase	0.741203	0.117545
Q00059	TFAM	Transcription factor A, mitochondrial, mtTFA, Mitochondrial transcription factor 1, MtTF1, Transcription factor 6, TCF-6, Transcription factor 6-like 2	0.530869	-0.759733
Q15149	PLEC	Plectin, PCN, PLTN, Hemidesmosomal protein 1, HD1, Plectin-1	0.317148	-0.456401
Q9H501	ESF1	ESF1 homolog, ABT1-associated protein	0.466926	0.294328
P26358	DNMT1	DNA (cytosine-5)-methyltransferase 1, Dnmt1, 2.1.1.37, CXXC-type zinc finger protein 9, DNA methyltransferase HsaI, DNA MTase HsaI, M.HsaI, MCMT	0.657213	-1.20088
O94913	PCF11	Pre-mRNA cleavage complex 2 protein Pcf11, Pre-mRNA cleavage complex II protein Pcf11	0.834961	0.378737
Q9NR56	MBNL1	Muscleblind-like protein 1, Triplet-expansion RNA-binding protein	0.315323	1.02778
Q9ULR0	ISY1	Pre-mRNA-splicing factor ISY1 homolog	0.953175	-0.457251
Q6PK04	CCDC137	Coiled-coil domain-containing protein 137	0.38755	0.292882
O60231	DHX16	Pre-mRNA-splicing factor ATP-dependent RNA helicase DHX16, 3.6.4.13, ATP-dependent RNA helicase #3, DEAH-box protein 16	0.694486	-0.700106
O60841	EIF5B	Eukaryotic translation initiation factor 5B, eIF-5B, 3.6.5.3, Translation initiation factor IF-2	0.352565	-0.256943
O75643	SNRNP200	U5 small nuclear ribonucleoprotein 200 kDa helicase, 3.6.4.13, Activating signal cointegrator 1 complex subunit 3-like 1, BRR2 homolog, U5 snRNP-specific 200 kDa protein, U5-200KD	0.409375	-0.892899
P62495	ETF1	Eukaryotic peptide chain release factor subunit 1, Eukaryotic release factor 1, eRF1, Protein Cl1, TB3-1	0.457682	-0.732296
Q14320	FAM50A	Protein FAM50A, Protein HXC-26, Protein XAP-5	1.10505	-1.15603
P10155	RO60	RNA-binding protein RO60, 60 kDa SS-A/Ro ribonucleoprotein, 60 kDa Ro protein, 60 kDa ribonucleoprotein Ro, RoRNP, Ro 60 kDa autoantigen, Ro60 autoantigen, Sjoegren syndrome antigen A2, Sjoegren syndrome type A antigen, SS-A, TROVE domain family member 2	0.601774	-0.664094
Q53EP0	FNDC3B	Fibronectin type III domain-containing protein 3B, Factor for adipocyte differentiation 104, HCV NS5A-binding protein 37	0.787668	0.26106
Q9NS39	ADARB2	Double-stranded RNA-specific editase B2, 3.5.-.-, RNA-dependent adenosine deaminase 3, RNA-editing deaminase 2, RNA-editing enzyme 2, dsRNA adenosine deaminase B2	0.956051	0.798711
Q8TCS8	PNPT1	Polyribonucleotide nucleotidyltransferase 1, mitochondrial, 2.7.7.8, 3'-5' RNA exonuclease OLD35, PNPase old-35, Polynucleotide phosphorylase 1, PNPase 1, Polynucleotide phosphorylase-like protein	0.594941	-1.1783
Q9BVP2	GNL3	Guanine nucleotide-binding protein-like 3, E2-induced gene 3 protein, Novel nucleolar protein 47, NNP47, Nucleolar GTP-binding protein 3, Nucleostemin	0.31935	0.139185
Q01082	SPTBN1	Spectrin beta chain, non-erythrocytic 1, Beta-II spectrin, Fodrin beta chain, Spectrin, non-erythroid beta chain 1	0.443401	-1.06079
Q8IVS2	MCAT	Malonyl-CoA-acyl carrier protein transacylase, mitochondrial, MCT, 2.3.1.39, Mitochondrial malonyl CoA:ACP acyltransferase, Mitochondrial malonyltransferase, [Acyl-carrier-protein] malonyltransferase	0.511808	0.267739
P15311	EZR	Ezrin, Cytovillin, Villin-2, p81	0.38158	-0.959898
P62937	PPIA	Peptidyl-prolyl cis-trans isomerase A, PPIase A, 5.2.1.8, Cyclophilin A, Cyclosporin A-binding protein, Rotamase A	0.339959	-1.76342
P21333	FLNA	Filamin-A, FLN-A, Actin-binding protein 280, ABP-280, Alpha-filamin, Endothelial actin-binding protein, Filamin-1, Non-muscle filamin	0.33654	-1.13951
Q14527	HLTF	Helicase-like transcription factor, 2.3.2.27, 3.6.4.-, DNA-binding protein/plasminogen activator inhibitor 1 regulator, HIP116, RING finger protein 80, RING-type E3 ubiquitin transferase HLTF, SWI/SNF-related matrix-associated actin-dependent regulator of chromatin subfamily A member 3, Sucrose nonfermenting protein 2-like 3	0.603092	-0.462707
P82933	MRPS9	28S ribosomal protein S9, mitochondrial, MRP-S9, S9mt, Mitochondrial small ribosomal subunit protein uS9m	0.389939	0.0400312
A5YKK6	CNOT1	CCR4-NOT transcription complex subunit 1, CCR4-associated factor 1, Negative regulator of transcription subunit 1 homolog, NOT1H, hNOT1	0.492718	-0.450139
Q5SY16	NOL9	Polynucleotide 5'-hydroxyl-kinase NOL9, 2.7.1.-, Nucleolar protein 9	0.503896	-0.130552
Q8NEJ9	NGDN	Neuroguidin, Centromere accumulated nuclear protein 1, CANu1, EIF4E-binding protein	0.498703	0.14193
P49792	RANBP2	E3 SUMO-protein ligase RanBP2, 2.3.2.-, 358 kDa nucleoporin, Nuclear pore complex protein Nup358, Nucleoporin Nup358, Ran-binding protein 2, RanBP2, p270	0.410425	-0.905955
Q92888	ARHGEF1	Rho guanine nucleotide exchange factor 1, 115 kDa guanine nucleotide exchange factor, p115-RhoGEF, p115RhoGEF, Sub1.5	0.741547	-0.411361
Q9H9J2	MRPL44	39S ribosomal protein L44, mitochondrial, L44mt, MRP-L44, 3.1.26.-, Mitochondrial large ribosomal subunit protein mL44	0.558892	-0.437341
Q9Y2Z4	YARS2	Tyrosine--tRNA ligase, mitochondrial, 6.1.1.1, Tyrosyl-tRNA synthetase, TyrRS	0.382784	-0.260097
Q9Y324	FCF1	rRNA-processing protein FCF1 homolog	0.417372	0.434794
P38432	COIL	Coilin, p80-coilin	0.581202	-0.30766
Q9UK61	TASOR	Protein TASOR, CTCL tumor antigen se89-1, Retinoblastoma-associated protein RAP140, Transgene activation suppressor protein	0.57167	0.508818
Q6P158	DHX57	Putative ATP-dependent RNA helicase DHX57, 3.6.4.13, DEAH box protein 57	0.321968	0.41788
P38646	HSPA9	Stress-70 protein, mitochondrial, 75 kDa glucose-regulated protein, GRP-75, Heat shock 70 kDa protein 9, Mortalin, MOT, Peptide-binding protein 74, PBP74	0.335887	-1.53818
O75400	PRPF40A	Pre-mRNA-processing factor 40 homolog A, Fas ligand-associated factor 1, Formin-binding protein 11, Formin-binding protein 3, Huntingtin yeast partner A, Huntingtin-interacting protein 10, HIP-10, Huntingtin-interacting protein A, Renal carcinoma antigen NY-REN-6	0.411109	-0.449125
P35241	RDX	Radixin	0.534562	-1.24359
P60228	EIF3E	Eukaryotic translation initiation factor 3 subunit E, eIF3e, Eukaryotic translation initiation factor 3 subunit 6, Viral integration site protein INT-6 homolog, eIF-3 p48	0.405649	-1.17571
P23284	PPIB	Peptidyl-prolyl cis-trans isomerase B, PPIase B, 5.2.1.8, CYP-S1, Cyclophilin B, Rotamase B, S-cyclophilin, SCYLP	0.423752	-2.07927
P49591	SARS1	Serine--tRNA ligase, cytoplasmic, 6.1.1.11, Seryl-tRNA synthetase, SerRS, Seryl-tRNA(Ser/Sec) synthetase	0.405402	-0.670878
Q9Y262	EIF3L	Eukaryotic translation initiation factor 3 subunit L, eIF3l, Eukaryotic translation initiation factor 3 subunit 6-interacting protein, Eukaryotic translation initiation factor 3 subunit E-interacting protein	0.405515	-1.28903
P54136	RARS1	Arginine--tRNA ligase, cytoplasmic, 6.1.1.19, Arginyl-tRNA synthetase, ArgRS	0.340176	-0.800428
O43143	DHX15	ATP-dependent RNA helicase DHX15, 3.6.4.13, ATP-dependent RNA helicase #46, DEAH box protein 15, Splicing factor Prp43, hPrp43	0.278866	-0.399113
P02786	TFRC	Transferrin receptor protein 1, TR, TfR, TfR1, Trfr, T9, p90, CD71	0.368771	-1.62482
Q13206	DDX10	Probable ATP-dependent RNA helicase DDX10, 3.6.4.13, DEAD box protein 10	0.268266	-0.349122
O15213	WDR46	WD repeat-containing protein 46, WD repeat-containing protein BING4	0.283643	0.323312
P61011	SRP54	Signal recognition particle subunit SRP54, 3.6.5.-, Signal recognition particle 54 kDa protein	0.45159	-0.35091
P24928	POLR2A	DNA-directed RNA polymerase II subunit RPB1, RNA polymerase II subunit B1, 2.7.7.6, DNA-directed RNA polymerase II subunit A, DNA-directed RNA polymerase III largest subunit, RNA-directed RNA polymerase II subunit RPB1, 2.7.7.48	0.280847	0.324916
P49750	YLPM1	YLP motif-containing protein 1, Nuclear protein ZAP3, ZAP113	0.364096	0.586029
P78527	PRKDC	DNA-dependent protein kinase catalytic subunit, DNA-PK catalytic subunit, DNA-PKcs, 2.7.11.1, DNPK1, p460	0.222235	-0.648696
A4D1E9	GTPBP10	GTP-binding protein 10, Protein obg homolog 2, ObgH2	0.616182	-0.475148
Q6P6C2	ALKBH5	RNA demethylase ALKBH5, 1.14.11.53, Alkylated DNA repair protein alkB homolog 5, Alpha-ketoglutarate-dependent dioxygenase alkB homolog 5	1.15748	0.133247
Q9UII4	HERC5	E3 ISG15--protein ligase HERC5, 2.3.2.-, Cyclin-E-binding protein 1, HECT domain and RCC1-like domain-containing protein 5	0.276548	0.594096
P63241	EIF5A	Eukaryotic translation initiation factor 5A-1, eIF-5A-1, eIF-5A1, Eukaryotic initiation factor 5A isoform 1, eIF-5A, Rev-binding factor, eIF-4D	0.281359	-1.2469
O75127	PTCD1	Pentatricopeptide repeat-containing protein 1, mitochondrial	0.397839	0.629345
P46060	RANGAP1	Ran GTPase-activating protein 1, RanGAP1	0.482294	-1.3788
P55884	EIF3B	Eukaryotic translation initiation factor 3 subunit B, eIF3b, Eukaryotic translation initiation factor 3 subunit 9, Prt1 homolog, hPrt1, eIF-3-eta, eIF3 p110, eIF3 p116	0.370289	-1.30544
Q15046	KARS1	Lysine--tRNA ligase, 2.7.7.-, 6.1.1.6, Lysyl-tRNA synthetase, LysRS	0.326015	-0.813761
O00178	GTPBP1	GTP-binding protein 1, G-protein 1, GP-1, GP1	0.53008	-0.258017
P62249	RPS16	40S ribosomal protein S16, Small ribosomal subunit protein uS9	0.238781	-1.04274
Q96EV2	RBM33	RNA-binding protein 33, Proline-rich protein 8, RNA-binding motif protein 33	0.606016	-0.321777
P54577	YARS1	Tyrosine--tRNA ligase, cytoplasmic, 6.1.1.1, Tyrosyl-tRNA synthetase, TyrRS	0.345565	-1.32194
P18583	SON	Protein SON, Bax antagonist selected in saccharomyces 1, BASS1, Negative regulatory element-binding protein, NRE-binding protein, Protein DBP-5, SON3	0.235111	0.183454
O95793	STAU1	Double-stranded RNA-binding protein Staufen homolog 1	0.465331	0.210901
Q13427	PPIG	Peptidyl-prolyl cis-trans isomerase G, PPIase G, Peptidyl-prolyl isomerase G, 5.2.1.8, CASP10, Clk-associating RS-cyclophilin, CARS-Cyp, CARS-cyclophilin, SR-cyclophilin, SR-cyp, SRcyp, Cyclophilin G, Rotamase G	0.340316	0.0585618
Q86U38	NOP9	Nucleolar protein 9	0.253827	0.488852
Q8IWS0	PHF6	PHD finger protein 6, PHD-like zinc finger protein	0.42676	-1.05266
Q7L2J0	MEPCE	7SK snRNA methylphosphate capping enzyme, MePCE, 2.1.1.-, Bicoid-interacting protein 3 homolog, Bin3 homolog	0.226892	0.363424
O75319	DUSP11	RNA/RNP complex-1-interacting phosphatase, 3.1.3.-, Dual specificity protein phosphatase 11, Phosphatase that interacts with RNA/RNP complex 1	0.291005	0.440369
Q14966	ZNF638	Zinc finger protein 638, Cutaneous T-cell lymphoma-associated antigen se33-1, CTCL-associated antigen se33-1, Nuclear protein 220, Zinc finger matrin-like protein	0.249379	0.181079
Q16658	FSCN1	Fascin, 55 kDa actin-bundling protein, Singed-like protein, p55	0.292549	-1.76604
Q15646	OASL	2'-5'-oligoadenylate synthase-like protein, 2'-5'-OAS-related protein, 2'-5'-OAS-RP, 59 kDa 2'-5'-oligoadenylate synthase-like protein, Thyroid receptor-interacting protein 14, TR-interacting protein 14, TRIP-14, p59 OASL, p59OASL	0.397119	0.361729
P07814	EPRS1	Bifunctional glutamate/proline--tRNA ligase, Bifunctional aminoacyl-tRNA synthetase, Cell proliferation-inducing gene 32 protein, Glutamatyl-prolyl-tRNA synthetase, Glutamate--tRNA ligase, 6.1.1.17, Glutamyl-tRNA synthetase, GluRS, Proline--tRNA ligase, 6.1.1.15, Prolyl-tRNA synthetase	0.221437	-0.969262
Q9UPT8	ZC3H4	Zinc finger CCCH domain-containing protein 4	0.306589	0.296913
O60287	URB1	Nucleolar pre-ribosomal-associated protein 1, Nucleolar protein 254 kDa, URB1 ribosome biogenesis 1 homolog	0.237735	0.111874
Q14562	DHX8	ATP-dependent RNA helicase DHX8, 3.6.4.13, DEAH box protein 8, RNA helicase HRH1	0.246029	0.261625
P51398	DAP3	28S ribosomal protein S29, mitochondrial, MRP-S29, S29mt, Death-associated protein 3, DAP-3, Ionizing radiation resistance conferring protein, Mitochondrial small ribosomal subunit protein mS29	0.387138	-0.762181
Q9BYD2	MRPL9	39S ribosomal protein L9, mitochondrial, L9mt, MRP-L9, Mitochondrial large ribosomal subunit protein bL9m	0.329917	-0.243391
Q16513	PKN2	Serine/threonine-protein kinase N2, 2.7.11.13, PKN gamma, Protein kinase C-like 2, Protein-kinase C-related kinase 2	0.309797	-0.939233
Q9H5Q4	TFB2M	Dimethyladenosine transferase 2, mitochondrial, 2.1.1.-, Hepatitis C virus NS5A-transactivated protein 5, HCV NS5A-transactivated protein 5, Mitochondrial 12S rRNA dimethylase 2, Mitochondrial transcription factor B2, h-mtTFB, h-mtTFB2, hTFB2M, mtTFB2, S-adenosylmethionine-6-N', N'-adenosyl(rRNA) dimethyltransferase 2	0.30392	-0.137767
Q9UPN3	MACF1	Microtubule-actin cross-linking factor 1, isoforms 1/2/3/4/5, 620 kDa actin-binding protein, ABP620, Actin cross-linking family protein 7, Macrophin-1, Trabeculin-alpha	0.299094	-0.43783
Q09161	NCBP1	Nuclear cap-binding protein subunit 1, 80 kDa nuclear cap-binding protein, CBP80, NCBP 80 kDa subunit	0.365125	-1.20579
Q92616	GCN1	eIF-2-alpha kinase activator GCN1, GCN1 eIF-2-alpha kinase activator homolog, GCN1-like protein 1, General control of amino-acid synthesis 1-like protein 1, Translational activator GCN1, HsGCN1	0.217168	-0.898986
P49756	RBM25	RNA-binding protein 25, Arg/Glu/Asp-rich protein of 120 kDa, RED120, Protein S164, RNA-binding motif protein 25, RNA-binding region-containing protein 7	0.288808	-0.580535
Q06830	PRDX1	Peroxiredoxin-1, 1.11.1.24, Natural killer cell-enhancing factor A, NKEF-A, Proliferation-associated gene protein, PAG, Thioredoxin peroxidase 2, Thioredoxin-dependent peroxide reductase 2, Thioredoxin-dependent peroxiredoxin 1	0.194423	-1.66438
Q7KZI7	MARK2	Serine/threonine-protein kinase MARK2, 2.7.11.1, 2.7.11.26, ELKL motif kinase 1, EMK-1, MAP/microtubule affinity-regulating kinase 2, PAR1 homolog, PAR1 homolog b, Par-1b, Par1b	0.631484	-1.40309
P50995	ANXA11	Annexin A11, 56 kDa autoantigen, Annexin XI, Annexin-11, Calcyclin-associated annexin 50, CAP-50	0.245416	-0.692091
P82673	MRPS35	28S ribosomal protein S35, mitochondrial, MRP-S35, S35mt, 28S ribosomal protein S28, mitochondrial, MRP-S28, S28mt, Mitochondrial small ribosomal subunit protein mS35	0.392758	-0.671686
Q9Y3I0	RTCB	RNA-splicing ligase RtcB homolog, 6.5.1.8, 3'-phosphate/5'-hydroxy nucleic acid ligase	0.201669	-0.648804
Q96A33	CCDC47	PAT complex subunit CCDC47, Calumin, Coiled-coil domain-containing protein 47	0.242342	-0.89109
Q96CB9	NSUN4	5-methylcytosine rRNA methyltransferase NSUN4, 2.1.1.-, 5-methylcytosine tRNA methyltransferase NSUN4, NOL1/NOP2/Sun domain family member 4	0.413725	-0.200983
Q9Y3B7	MRPL11	39S ribosomal protein L11, mitochondrial, L11mt, MRP-L11, Mitochondrial large ribosomal subunit protein uL11m	0.286462	-0.797783
O95232	LUC7L3	Luc7-like protein 3, Cisplatin resistance-associated-overexpressed protein, Luc7A, Okadaic acid-inducible phosphoprotein OA48-18, cAMP regulatory element-associated protein 1, CRE-associated protein 1, CREAP-1	0.262088	-0.653181
P52292	KPNA2	Importin subunit alpha-1, Karyopherin subunit alpha-2, RAG cohort protein 1, SRP1-alpha	0.185959	-1.05659
Q15056	EIF4H	Eukaryotic translation initiation factor 4H, eIF-4H, Williams-Beuren syndrome chromosomal region 1 protein	0.13549	0.110426
Q15477	SKIC2	SKI2 subunit of superkiller complex protein, Helicase SKI2W, Ski2, 3.6.4.13, Helicase-like protein, HLP	0.259989	-0.428729
A0A384MDY0	CTNNA1	Catenin (Cadherin-associated protein), alpha 1, 102kDa, isoform CRA_b, Epididymis secretory sperm binding protein	0.165343	-0.589342
P52948	NUP98	Nuclear pore complex protein Nup98-Nup96, 3.4.21.-	0.306974	-1.44774
Q9H0D6	XRN2	5'-3' exoribonuclease 2, 3.1.13.-, DHM1-like protein, DHP protein	0.136843	0.116886
Q86VM9	ZC3H18	Zinc finger CCCH domain-containing protein 18, Nuclear protein NHN1	0.185916	-0.186255
Q9Y606	PUS1	Pseudouridylate synthase 1 homolog, 5.4.99.-, tRNA pseudouridine synthase 1, 5.4.99.12, tRNA pseudouridine(38-40) synthase, tRNA pseudouridylate synthase I, tRNA-uridine isomerase I	0.241976	-0.844232
Q9BQ52	ELAC2	Zinc phosphodiesterase ELAC protein 2, 3.1.26.11, ElaC homolog protein 2, Heredity prostate cancer protein 2, Ribonuclease Z 2, RNase Z 2, tRNA 3 endonuclease 2, tRNase Z 2	0.187286	-1.04444
P48200	IREB2	Iron-responsive element-binding protein 2, IRE-BP 2, Iron regulatory protein 2, IRP2	0.336372	0.10053
O14647	CHD2	Chromodomain-helicase-DNA-binding protein 2, CHD-2, 3.6.4.12, ATP-dependent helicase CHD2	0.551421	0.00933296
P11388	TOP2A	DNA topoisomerase 2-alpha, 5.6.2.2, DNA topoisomerase II, alpha isozyme	0.140192	-0.786152
Q8IX12	CCAR1	Cell division cycle and apoptosis regulator protein 1, Cell cycle and apoptosis regulatory protein 1, CARP-1, Death inducer with SAP domain	0.170597	-0.614735
Q12931	TRAP1	Heat shock protein 75 kDa, mitochondrial, HSP 75, TNFR-associated protein 1, Tumor necrosis factor type 1 receptor-associated protein, TRAP-1	0.204447	-1.86279
Q9H583	HEATR1	HEAT repeat-containing protein 1, Protein BAP28, U3 small nucleolar RNA-associated protein 10 homolog	0.175788	-0.935642
Q8IYB3	SRRM1	Serine/arginine repetitive matrix protein 1, SR-related nuclear matrix protein of 160 kDa, SRm160, Ser/Arg-related nuclear matrix protein	0.206023	-0.518588
Q6UN15	FIP1L1	Pre-mRNA 3'-end-processing factor FIP1, hFip1, FIP1-like 1 protein, Factor interacting with PAP, Rearranged in hypereosinophilia	0.158845	0.156382
Q02790	FKBP4	Peptidyl-prolyl cis-trans isomerase FKBP4, PPIase FKBP4, 5.2.1.8, 51 kDa FK506-binding protein, FKBP51, 52 kDa FK506-binding protein, 52 kDa FKBP, FKBP-52, 59 kDa immunophilin, p59, FK506-binding protein 4, FKBP-4, FKBP59, HSP-binding immunophilin, HBI, Immunophilin FKBP52, Rotamase	0.118614	-0.97936
Q9UKV3	ACIN1	Apoptotic chromatin condensation inducer in the nucleus, Acinus	0.191307	-1.02097
Q8IYB8	SUPV3L1	ATP-dependent RNA helicase SUPV3L1, mitochondrial, 3.6.4.13, Suppressor of var1 3-like protein 1, SUV3-like protein 1	0.293033	-0.853648
Q8NDD1	C1orf131	Uncharacterized protein C1orf131	0.314159	-0.841337
P25705	ATP5F1A	ATP synthase subunit alpha, mitochondrial, ATP synthase F1 subunit alpha	0.158584	-2.12421
P21399	ACO1	Cytoplasmic aconitate hydratase, Aconitase, 4.2.1.3, Citrate hydro-lyase, Ferritin repressor protein, Iron regulatory protein 1, IRP1, Iron-responsive element-binding protein 1, IRE-BP 1	0.172029	-1.02662
O95163	ELP1	Elongator complex protein 1, ELP1, IkappaB kinase complex-associated protein, IKK complex-associated protein, p150	0.18397	-1.27649
Q9UJA5	TRMT6	tRNA (adenine(58)-N(1))-methyltransferase non-catalytic subunit TRM6, mRNA methyladenosine-N(1)-methyltransferase non-catalytic subunit TRM6, tRNA(m1A58)-methyltransferase subunit TRM6, tRNA(m1A58)MTase subunit TRM6	0.140189	-0.199141
Q14240	EIF4A2	Eukaryotic initiation factor 4A-II, eIF-4A-II, eIF4A-II, 3.6.4.13, ATP-dependent RNA helicase eIF4A-2	0.163034	-0.927773
Q5C9Z4	NOM1	Nucleolar MIF4G domain-containing protein 1, SGD1 homolog	0.113579	0.241298
O94906	PRPF6	Pre-mRNA-processing factor 6, Androgen receptor N-terminal domain-transactivating protein 1, ANT-1, PRP6 homolog, U5 snRNP-associated 102 kDa protein, U5-102 kDa protein	0.107982	-1.06037
P11142	HSPA8	Heat shock cognate 71 kDa protein, 3.6.4.10, Heat shock 70 kDa protein 8, Lipopolysaccharide-associated protein 1, LAP-1, LPS-associated protein 1	0.0684619	-1.80154
P55039	DRG2	Developmentally-regulated GTP-binding protein 2, DRG-2, Translation factor GTPase DRG2, TRAFAC GTPase DRG2, 3.6.5.-	0.161725	-1.42419
Q5VTL8	PRPF38B	Pre-mRNA-splicing factor 38B, Sarcoma antigen NY-SAR-27	0.12082	-0.643913
P43897	TSFM	Elongation factor Ts, mitochondrial, EF-Ts, EF-TsMt	0.13053	-1.26289
P26447	S100A4	Protein S100-A4, Calvasculin, Metastasin, Placental calcium-binding protein, Protein Mts1, S100 calcium-binding protein A4	0.142444	-2.02205
Q8NAV1	PRPF38A	Pre-mRNA-splicing factor 38A	0.0965617	-0.02132
Q9NSE4	IARS2	Isoleucine--tRNA ligase, mitochondrial, 6.1.1.5, Isoleucyl-tRNA synthetase, IleRS	0.116617	-1.18666
P21291	CSRP1	Cysteine and glycine-rich protein 1, Cysteine-rich protein 1, CRP, CRP1, Epididymis luminal protein 141, HEL-141	0.0914082	-1.54466
Q9BUQ8	DDX23	Probable ATP-dependent RNA helicase DDX23, 3.6.4.13, 100 kDa U5 snRNP-specific protein, DEAD box protein 23, PRP28 homolog, U5-100kD	0.0686746	-0.673508
Q7L8L6	FASTKD5	FAST kinase domain-containing protein 5, mitochondrial	0.260569	-1.09061
Q8WUA2	PPIL4	Peptidyl-prolyl cis-trans isomerase-like 4, PPIase, 5.2.1.8, Cyclophilin-like protein PPIL4, Rotamase PPIL4	0.0704291	0.421802
P49368	CCT3	T-complex protein 1 subunit gamma, TCP-1-gamma, CCT-gamma, hTRiC5	0.0651902	-1.82797
Q9NP81	SARS2	Serine--tRNA ligase, mitochondrial, 6.1.1.11, SerRSmt, Seryl-tRNA synthetase, SerRS, Seryl-tRNA(Ser/Sec) synthetase	0.160127	-0.867832
Q92665	MRPS31	28S ribosomal protein S31, mitochondrial, MRP-S31, S31mt, Imogen 38, Mitochondrial small ribosomal subunit protein mS31	0.09993	-0.539749
Q12788	TBL3	Transducin beta-like protein 3, WD repeat-containing protein SAZD	0.0722948	-1.01331
Q7L0Y3	TRMT10C	tRNA methyltransferase 10 homolog C, HBV pre-S2 trans-regulated protein 2, Mitochondrial ribonuclease P protein 1, Mitochondrial RNase P protein 1, RNA (guanine-9-)-methyltransferase domain-containing protein 1, Renal carcinoma antigen NY-REN-49, mRNA methyladenosine-N(1)-methyltransferase, 2.1.1.-, tRNA (adenine(9)-N(1))-methyltransferase, 2.1.1.218, tRNA (guanine(9)-N(1))-methyltransferase, 2.1…	0.0463056	-0.22727
O75390	CS	Citrate synthase, mitochondrial, 2.3.3.1, Citrate (Si)-synthase	0.0820411	-2.01043
Q96RP9	GFM1	Elongation factor G, mitochondrial, EF-Gmt, Elongation factor G 1, mitochondrial, mEF-G 1, Elongation factor G1, hEFG1	0.0597612	-1.08064
Q01780	EXOSC10	Exosome component 10, 3.1.13.-, Autoantigen PM/Scl 2, P100 polymyositis-scleroderma overlap syndrome-associated autoantigen, Polymyositis/scleroderma autoantigen 100 kDa, PM/Scl-100, Polymyositis/scleroderma autoantigen 2	0.0492161	-0.227111
P40763	STAT3	Signal transducer and activator of transcription 3, Acute-phase response factor	0.0396481	-0.943827
P12270	TPR	Nucleoprotein TPR, Megator, NPC-associated intranuclear protein, Translocated promoter region protein	0.0351285	-0.715947
P49411	TUFM	Elongation factor Tu, mitochondrial, EF-Tu, P43	0.0383446	-1.60825
K7EJE8	LONP1	Lon protease homolog, mitochondrial, 3.4.21.53, Lon protease-like protein, LONP, Mitochondrial ATP-dependent protease Lon, Serine protease 15	0.0464872	-1.77691
Q9NWU5	MRPL22	39S ribosomal protein L22, mitochondrial, L22mt, MRP-L22, 39S ribosomal protein L25, mitochondrial, L25mt, MRP-L25, Mitochondrial large ribosomal subunit protein uL22m	0.0311728	-0.342553
Q14697	GANAB	Neutral alpha-glucosidase AB, 3.2.1.207, Alpha-glucosidase 2, Glucosidase II subunit alpha	0.0234559	-1.07631
Q9NNW5	WDR6	WD repeat-containing protein 6	0.0650851	-1.16102
P08670	VIM	Vimentin	0.00849448	-2.02995
P14625	HSP90B1	Endoplasmin, 94 kDa glucose-regulated protein, GRP-94, Heat shock protein 90 kDa beta member 1, Tumor rejection antigen 1, gp96 homolog	0.00348335	-2.15994
P08579	SNRPB2	U2 small nuclear ribonucleoprotein B'', U2 snRNP B''	0.00306335	-1.05901
P50395	GDI2	Rab GDP dissociation inhibitor beta, Rab GDI beta, Guanosine diphosphate dissociation inhibitor 2, GDI-2	-0.00338911	-1.61544
Q99714	HSD17B10	3-hydroxyacyl-CoA dehydrogenase type-2, 1.1.1.35, 17-beta-estradiol 17-dehydrogenase, 1.1.1.62, 2-methyl-3-hydroxybutyryl-CoA dehydrogenase, MHBD, 3-alpha-(17-beta)-hydroxysteroid dehydrogenase (NAD(+)), 1.1.1.239, 3-hydroxy-2-methylbutyryl-CoA dehydrogenase, 1.1.1.178, 3-hydroxyacyl-CoA dehydrogenase type II, 3alpha(or 20beta)-hydroxysteroid dehydrogenase, 1.1.1.53, 7-alpha-hydroxysteroid dehydr…	-0.00545428	-1.48865
Q9BSC4	NOL10	Nucleolar protein 10	-0.0126719	-0.270028
P41252	IARS1	Isoleucine--tRNA ligase, cytoplasmic, 6.1.1.5, Isoleucyl-tRNA synthetase, IRS, IleRS	-0.0165665	-1.42155
P34897	SHMT2	Serine hydroxymethyltransferase, mitochondrial, SHMT, 2.1.2.1, Glycine hydroxymethyltransferase, Serine methylase	-0.0176657	-1.61731
P61764	STXBP1	Syntaxin-binding protein 1, MUNC18-1, N-Sec1, Protein unc-18 homolog 1, Unc18-1, Protein unc-18 homolog A, Unc-18A, p67	-0.033401	-1.16623
O14980	XPO1	Exportin-1, Exp1, Chromosome region maintenance 1 protein homolog	-0.0541848	-2.02439
Q9NYK5	MRPL39	39S ribosomal protein L39, mitochondrial, L39mt, MRP-L39, 39S ribosomal protein L5, mitochondrial, L5mt, MRP-L5, Mitochondrial large ribosomal subunit protein mL39	-0.0358743	-0.448256
Q08J23	NSUN2	RNA cytosine C(5)-methyltransferase NSUN2, 2.1.1.-, Myc-induced SUN domain-containing protein, Misu, NOL1/NOP2/Sun domain family member 2, Substrate of AIM1/Aurora kinase B, mRNA cytosine C(5)-methyltransferase, tRNA cytosine C(5)-methyltransferase, 2.1.1.203, tRNA methyltransferase 4 homolog, hTrm4	-0.0249058	-0.144632
P54886	ALDH18A1	Delta-1-pyrroline-5-carboxylate synthase, P5CS, Aldehyde dehydrogenase family 18 member A1, Glutamate 5-kinase, GK, 2.7.2.11, Gamma-glutamyl kinase, Gamma-glutamyl phosphate reductase, GPR, 1.2.1.41, Glutamate-5-semialdehyde dehydrogenase, Glutamyl-gamma-semialdehyde dehydrogenase	-0.0395673	-0.970092
P09543	CNP	2',3'-cyclic-nucleotide 3'-phosphodiesterase, CNP, CNPase, 3.1.4.37	-0.173488	-2.19893
P55209	NAP1L1	Nucleosome assembly protein 1-like 1, NAP-1-related protein, hNRP	-0.0666698	-1.92875
Q9NUL7	DDX28	Probable ATP-dependent RNA helicase DDX28, 3.6.4.13, Mitochondrial DEAD box protein 28	-0.0469507	0.080742
P49588	AARS1	Alanine--tRNA ligase, cytoplasmic, 6.1.1.7, Alanyl-tRNA synthetase, AlaRS, Renal carcinoma antigen NY-REN-42	-0.0891133	-1.70243
P07737	PFN1	Profilin-1, Epididymis tissue protein Li 184a, Profilin I	-0.0676818	-2.27556
Q14204	DYNC1H1	Cytoplasmic dynein 1 heavy chain 1, Cytoplasmic dynein heavy chain 1, Dynein heavy chain, cytosolic	-0.0544445	-1.20314
P04075	ALDOA	Fructose-bisphosphate aldolase A, 4.1.2.13, Lung cancer antigen NY-LU-1, Muscle-type aldolase	-0.0627177	-2.17335
Q68CQ4	UTP25	U3 small nucleolar RNA-associated protein 25 homolog, Digestive organ expansion factor homolog, UTP25 small subunit processor component	-0.0655082	-0.204898
Q8NI27	THOC2	THO complex subunit 2, Tho2, hTREX120	-0.090299	-0.950076
P08195	SLC3A2	4F2 cell-surface antigen heavy chain, 4F2hc, 4F2 heavy chain antigen, Lymphocyte activation antigen 4F2 large subunit, Solute carrier family 3 member 2, CD98	-0.0661937	-1.6378
Q9HCJ3	RAVER2	Ribonucleoprotein PTB-binding 2, Protein raver-2	-0.0767869	0.581961
P07900	HSP90AA1	Heat shock protein HSP 90-alpha, 3.6.4.10, Heat shock 86 kDa, HSP 86, HSP86, Lipopolysaccharide-associated protein 2, LAP-2, LPS-associated protein 2, Renal carcinoma antigen NY-REN-38	-0.102076	-2.1053
O60610	DIAPH1	Protein diaphanous homolog 1, Diaphanous-related formin-1, DRF1	-0.156564	-1.31503
Q9HCG8	CWC22	Pre-mRNA-splicing factor CWC22 homolog, Nucampholin homolog, fSAPb	-0.258807	-0.489145
Q7L576	CYFIP1	Cytoplasmic FMR1-interacting protein 1, Specifically Rac1-associated protein 1, Sra-1, p140sra-1	-0.227678	-1.5872
P68104	EEF1A1	Elongation factor 1-alpha 1, EF-1-alpha-1, Elongation factor Tu, EF-Tu, Eukaryotic elongation factor 1 A-1, eEF1A-1, Leukocyte receptor cluster member 7	-0.091334	-1.68502
P35580	MYH10	Myosin-10, Cellular myosin heavy chain, type B, Myosin heavy chain 10, Myosin heavy chain, non-muscle IIb, Non-muscle myosin heavy chain B, NMMHC-B, Non-muscle myosin heavy chain IIb, NMMHC II-b, NMMHC-IIB	-0.179266	-1.34023
P56192	MARS1	Methionine--tRNA ligase, cytoplasmic, 6.1.1.10, Methionyl-tRNA synthetase, MetRS	-0.198147	-1.63203
O60763	USO1	General vesicular transport factor p115, Protein USO1 homolog, Transcytosis-associated protein, TAP, Vesicle-docking protein	-0.697534	-2.86602
P62913	RPL11	60S ribosomal protein L11, CLL-associated antigen KW-12, Large ribosomal subunit protein uL5	-0.166312	-1.59152
P10809	HSPD1	60 kDa heat shock protein, mitochondrial, 5.6.1.7, 60 kDa chaperonin, Chaperonin 60, CPN60, Heat shock protein 60, HSP-60, Hsp60, HuCHA60, Mitochondrial matrix protein P1, P60 lymphocyte protein	-0.153488	-1.74943
P09429	HMGB1	High mobility group protein B1, High mobility group protein 1, HMG-1	-0.145497	-1.25496
P00966	ASS1	Argininosuccinate synthase, 6.3.4.5, Citrulline--aspartate ligase	-0.212245	-2.05683
Q8NI36	WDR36	WD repeat-containing protein 36, T-cell activation WD repeat-containing protein, TA-WDRP	-0.231609	-1.03695
Q9Y383	LUC7L2	Putative RNA-binding protein Luc7-like 2	-0.236727	-0.886576
P40227	CCT6A	T-complex protein 1 subunit zeta, TCP-1-zeta, Acute morphine dependence-related protein 2, CCT-zeta-1, HTR3, Tcp20	-0.277958	-2.16968
Q07954	LRP1	Prolow-density lipoprotein receptor-related protein 1, LRP-1, Alpha-2-macroglobulin receptor, A2MR, Apolipoprotein E receptor, APOER, CD91	-0.509425	-0.308978
Q9H307	PNN	Pinin, 140 kDa nuclear and cell adhesion-related phosphoprotein, Desmosome-associated protein, Domain-rich serine protein, DRS protein, DRSP, Melanoma metastasis clone A protein, Nuclear protein SDK3, SR-like protein	-0.192595	-0.379232
Q15287	RNPS1	RNA-binding protein with serine-rich domain 1, SR-related protein LDC2	-0.214096	-0.390384
Q9UKA9	PTBP2	Polypyrimidine tract-binding protein 2, Neural polypyrimidine tract-binding protein, Neurally-enriched homolog of PTB, PTB-like protein	-0.193444	0.733355
O43719	HTATSF1	HIV Tat-specific factor 1, Tat-SF1	-0.392245	-1.13734
P15170	GSPT1	Eukaryotic peptide chain release factor GTP-binding subunit ERF3A, Eukaryotic peptide chain release factor subunit 3a, eRF3a, G1 to S phase transition protein 1 homolog	-0.243839	-1.12226
Q14974	KPNB1	Importin subunit beta-1, Importin-90, Karyopherin subunit beta-1, Nuclear factor p97, Pore targeting complex 97 kDa subunit, PTAC97	-0.322707	-1.80521
P20073	ANXA7	Annexin A7, Annexin VII, Annexin-7, Synexin	-0.337092	-1.10015
P06733	ENO1	Alpha-enolase, 4.2.1.11, 2-phospho-D-glycerate hydro-lyase, C-myc promoter-binding protein, Enolase 1, MBP-1, MPB-1, Non-neural enolase, NNE, Phosphopyruvate hydratase, Plasminogen-binding protein	-0.239425	-2.06463
Q00610	CLTC	Clathrin heavy chain 1, Clathrin heavy chain on chromosome 17, CLH-17	-0.283585	-1.81502
P15924	DSP	Desmoplakin, DP, 250/210 kDa paraneoplastic pemphigus antigen	-0.211907	-0.637496
Q2NL82	TSR1	Pre-rRNA-processing protein TSR1 homolog	-0.274444	-0.600598
O00410	IPO5	Importin-5, Imp5, Importin subunit beta-3, Karyopherin beta-3, Ran-binding protein 5, RanBP5	-0.249736	-0.751988
Q13428	TCOF1	Treacle protein, Treacher Collins syndrome protein	-0.34548	-1.30318
Q9Y580	RBM7	RNA-binding protein 7, RNA-binding motif protein 7	-0.315407	0.417936
P07355	ANXA2	Annexin A2, Annexin II, Annexin-2, Calpactin I heavy chain, Calpactin-1 heavy chain, Chromobindin-8, Lipocortin II, Placental anticoagulant protein IV, PAP-IV, Protein I, p36	-0.317056	-2.00118
P35579	MYH9	Myosin, heavy polypeptide 9, non-muscle, isoform CRA_a	-0.279925	-1.72326
P50991	CCT4	T-complex protein 1 subunit delta, TCP-1-delta, CCT-delta, Stimulator of TAR RNA-binding	-0.346421	-1.82693
Q8WVM0	TFB1M	Dimethyladenosine transferase 1, mitochondrial, 2.1.1.-, Mitochondrial 12S rRNA dimethylase 1, Mitochondrial transcription factor B1, h-mtTFB, h-mtTFB1, hTFB1M, mtTFB1, S-adenosylmethionine-6-N', N'-adenosyl(rRNA) dimethyltransferase 1	-0.586118	-0.237267
P08238	HSP90AB1	Heat shock protein HSP 90-beta, HSP 90, Heat shock 84 kDa, HSP 84, HSP84	-0.246697	-1.63713
Q05048	CSTF1	Cleavage stimulation factor subunit 1, CF-1 50 kDa subunit, Cleavage stimulation factor 50 kDa subunit, CSTF 50 kDa subunit, CstF-50	-0.411474	-0.726759
Q7Z2T5	TRMT1L	TRMT1-like protein, 2.1.1.-	-0.436686	-0.0209882
Q9Y5B9	SUPT16H	FACT complex subunit SPT16, Chromatin-specific transcription elongation factor 140 kDa subunit, FACT 140 kDa subunit, FACTp140, Facilitates chromatin transcription complex subunit SPT16, hSPT16	-0.357895	-1.041
Q8N983	MRPL43	39S ribosomal protein L43, mitochondrial, L43mt, MRP-L43, Mitochondrial large ribosomal subunit protein mL43, Mitochondrial ribosomal protein bMRP36a	-0.349504	0.120183
Q9H0A0	NAT10	RNA cytidine acetyltransferase, 2.3.1.-, 18S rRNA cytosine acetyltransferase, N-acetyltransferase 10, N-acetyltransferase-like protein, hALP	-0.390448	-1.05328
Q9Y314	NOSIP	Nitric oxide synthase-interacting protein, E3 ubiquitin-protein ligase NOSIP, 2.3.2.27, RING-type E3 ubiquitin transferase NOSIP, eNOS-interacting protein	-0.59901	-1.26009
P13667	PDIA4	Protein disulfide-isomerase A4, 5.3.4.1, Endoplasmic reticulum resident protein 70, ER protein 70, ERp70, Endoplasmic reticulum resident protein 72, ER protein 72, ERp-72, ERp72	-0.580027	-2.05901
P14618	PKM	Pyruvate kinase PKM, 2.7.1.40, Cytosolic thyroid hormone-binding protein, CTHBP, Opa-interacting protein 3, OIP-3, Pyruvate kinase 2/3, Pyruvate kinase muscle isozyme, Threonine-protein kinase PKM2, 2.7.11.1, Thyroid hormone-binding protein 1, THBP1, Tumor M2-PK, Tyrosine-protein kinase PKM2, 2.7.10.2, p58	-0.373193	-1.96754
P58107	EPPK1	Epiplakin, 450 kDa epidermal antigen	-0.335204	-0.488585
Q5T200	ZC3H13	Zinc finger CCCH domain-containing protein 13	-0.551712	-0.184966
P04792	HSPB1	Heat shock protein beta-1, HspB1, 28 kDa heat shock protein, Estrogen-regulated 24 kDa protein, Heat shock 27 kDa protein, HSP 27, Stress-responsive protein 27, SRP27	-0.844453	-3.30022
P17987	TCP1	T-complex protein 1 subunit alpha, TCP-1-alpha, CCT-alpha	-0.390356	-1.05028
A0A0U1RQF0	FASN	Fatty acid synthase, 1.1.1.100, 1.3.1.39, 2.3.1.38, 2.3.1.39, 2.3.1.41, 2.3.1.85, 3.1.2.14, 4.2.1.59	-0.396716	-1.40476
P42696	RBM34	RNA-binding protein 34, RNA-binding motif protein 34	-0.42543	-0.273225
P17480	UBTF	Nucleolar transcription factor 1, Autoantigen NOR-90, Upstream-binding factor 1, UBF-1	-0.448116	-0.421393
Q9BSH4	TACO1	Translational activator of cytochrome c oxidase 1, Coiled-coil domain-containing protein 44, Translational activator of mitochondrially-encoded cytochrome c oxidase I	-0.74988	-0.96385
Q7Z6Z7	HUWE1	E3 ubiquitin-protein ligase HUWE1, 2.3.2.26, ARF-binding protein 1, ARF-BP1, HECT, UBA and WWE domain-containing protein 1, HECT-type E3 ubiquitin transferase HUWE1, Homologous to E6AP carboxyl terminus homologous protein 9, HectH9, Large structure of UREB1, LASU1, Mcl-1 ubiquitin ligase E3, Mule, Upstream regulatory element-binding protein 1, URE-B1, URE-binding protein 1	-0.79813	-1.82841
P48643	CCT5	T-complex protein 1 subunit epsilon, TCP-1-epsilon, CCT-epsilon	-0.633792	-2.12411
P55072	VCP	Transitional endoplasmic reticulum ATPase, TER ATPase, 3.6.4.6, 15S Mg(2+)-ATPase p97 subunit, Valosin-containing protein, VCP	-0.733513	-2.1258
O43707	ACTN4	Alpha-actinin-4, Non-muscle alpha-actinin 4	-0.753947	-2.16049
Q06787	FMR1	Fragile X messenger ribonucleoprotein 1, Fragile X messenger ribonucleoprotein, FMRP, Protein FMR-1	-0.648024	-0.0900303
Q8IZ69	TRMT2A	tRNA (uracil-5-)-methyltransferase homolog A, 2.1.1.35, mRNA (uracil-5-)-methyltransferase TRMT2A, 2.1.1.-	-0.78891	0.0475074
P27797	CALR	Calreticulin, CRP55, Calregulin, Endoplasmic reticulum resident protein 60, ERp60, HACBP, grp60	-1.14761	-2.81637
O00411	POLRMT	DNA-directed RNA polymerase, mitochondrial, MtRPOL, 2.7.7.6	-1.54122	-1.03643

## Sheet: Figure 4C
Figure 4C
Complete list of candidate RBPs with estimated UV-crosslinking efficiencies included as part of Supplementary Table 2. GO-annotations were exported from PANTHER V17.0 (Thomas et al., 2003) and made available in Supplemental Table S5.
Complete MS datasets from SILAC LC-MS/MS analysis of clRNP fractions and LC-MS/MS analysis of input and clRNP fractions included as part of Supplemental Table S1 [Kristofich and Nicchitta, 2023]; see referenced study for additional information on sample prep, SILAC or non-SILAC LC-MS/MS analysis, and data processing.
Estimated S/N ratios for candidate RBPs (i.e., those displaying significant UV-enrichment) which do not contain at least 2 unique peptide matches were not used for estimation of protein-specific UV-crosslinking efficiencies. Proteins with pseudo-log2(S/N) ratios of 10 were excluded from Figure 4A–D.
Log10 normalization of protein UV-crosslinking efficiencies and abundances was performed using the average %CL and %TP values of n = 3 biologically independent replicates respectively.
Figure 4C. Scatterplot, GO-annotated RBPs.						Figure 4C. Scatterplot, other.								Linear regression performed using Line Of Fit feature available on JMP Pro 17.0 with the following settings, Fit: Polynomial; Degree: Linear; Confidence: Fit.
Assigned UniProt ID	Primary gene name	Protein name	Log10(%CL)	(log10(%TP))input		Assigned UniProt ID	Primary gene name	Protein name	Log10(%CL)	(log10(%TP))input
P09651	HNRNPA1	Heterogeneous nuclear ribonucleoprotein A1, hnRNP A1, Helix-destabilizing protein, Single-strand RNA-binding protein, hnRNP core protein A1	0.780204	-0.144815		Q10713	PMPCA	Mitochondrial-processing peptidase subunit alpha, Alpha-MPP, Inactive zinc metalloprotease alpha, P-55	-0.105502	-1.16307				Test Type	Group (series)	Independent variable(s)	Dependent variable(s)	Statistical test results
P19338	NCL	Nucleolin, Protein C23	0.894285	0.122552		Q9BQC6	MRPL57	Ribosomal protein 63, mitochondrial, hMRP63, Mitochondrial large ribosomal subunit protein mL63, Mitochondrial ribosomal protein 63, Mitochondrial ribosomal protein L57	0.584513	-3.18101				Linear Regression	GO-annotated RBPs	Protein-specific UV-crosslinking efficiency, log10(%CL).	Observed protein abundance in input fractions, log10(%TPO)input.	F(1, 764) = 106.11, p < .001
O14979	HNRNPDL	Heterogeneous nuclear ribonucleoprotein D-like, hnRNP D-like, hnRNP DL, AU-rich element RNA-binding factor, JKT41-binding protein, Protein laAUF1	0.860979	-1.5476		Q9BVS4	RIOK2	Serine/threonine-protein kinase RIO2, 2.7.11.1, RIO kinase 2	0.67769	-1.97939				Linear Regression	Other	Protein-specific UV-crosslinking efficiency, log10(%CL).	Observed protein abundance in input fractions, log10(%TPO)input.	F(1, 296) = 178.51, p < .001
P15880	RPS2	40S ribosomal protein S2, 40S ribosomal protein S4, Protein LLRep3, Small ribosomal subunit protein uS5	1.25139	-0.497922		Q96GA3	LTV1	Protein LTV1 homolog	0.118277	-2.57022
P51991	HNRNPA3	Heterogeneous nuclear ribonucleoprotein A3, hnRNP A3	0.750179	-0.789739		Q9H8Y5	ANKZF1	Ankyrin repeat and zinc finger domain-containing protein 1, Zinc finger protein 744	-0.0223608	-3.09188
P46777	RPL5	60S ribosomal protein L5, Large ribosomal subunit protein uL18	1.0161	-0.465988		Q9ULX3	NOB1	RNA-binding protein NOB1, 3.1.-.-, Phosphorylation regulatory protein HP-10, Protein ART-4	0.222375	-1.94881
P62917	RPL8	60S ribosomal protein L8, Large ribosomal subunit protein uL2	1.12365	-0.4449		P30419	NMT1	Glycylpeptide N-tetradecanoyltransferase 1, 2.3.1.97, Myristoyl-CoA:protein N-myristoyltransferase 1, HsNMT1, NMT 1, Type I N-myristoyltransferase, Peptide N-myristoyltransferase 1, Protein-lysine myristoyltransferase NMT1, 2.3.1.-	-0.0931814	-1.96313
Q13148	TARDBP	TAR DNA-binding protein 43, TDP-43	1.52787	-1.42889		Q13057	COASY	Bifunctional coenzyme A synthase, CoA synthase, NBP, POV-2, Phosphopantetheine adenylyltransferase, 2.7.7.3, Dephospho-CoA pyrophosphorylase, Pantetheine-phosphate adenylyltransferase, PPAT, Dephospho-CoA kinase, DPCK, 2.7.1.24, Dephosphocoenzyme A kinase, DPCOAK	0.524167	-1.85127
Q15717	ELAVL1	ELAV-like protein 1, Hu-antigen R, HuR	1.66172	-1.11389		P26641	EEF1G	Elongation factor 1-gamma, EF-1-gamma, eEF-1B gamma	-1.06392	-0.677469
P22626	HNRNPA2B1	Heterogeneous nuclear ribonucleoproteins A2/B1, hnRNP A2/B1	0.931607	-0.235078		P32754	HPD	4-hydroxyphenylpyruvate dioxygenase, 1.13.11.27, 4-hydroxyphenylpyruvic acid oxidase, 4HPPD, HPD, HPPDase	-1.32874	-1.31868
P61978	HNRNPK	Heterogeneous nuclear ribonucleoprotein K, hnRNP K, Transformation up-regulated nuclear protein, TUNP	0.653256	-0.643124		Q9HC35	EML4	Echinoderm microtubule-associated protein-like 4, EMAP-4, Restrictedly overexpressed proliferation-associated protein, Ropp 120	-0.368658	-1.939
P38159	RBMX	RNA-binding motif protein, X chromosome, Glycoprotein p43, Heterogeneous nuclear ribonucleoprotein G, hnRNP G	0.641992	-0.874715		Q9NVU7	SDAD1	Protein SDA1 homolog, Nucleolar protein 130, SDA1 domain-containing protein 1, hSDA	0.460705	-2.56421
Q92804	TAF15	TATA-binding protein-associated factor 2N, 68 kDa TATA-binding protein-associated factor, TAF(II)68, TAFII68, RNA-binding protein 56	0.872205	-1.73012		Q92576	PHF3	PHD finger protein 3	0.545638	-3.30676
P52272	HNRNPM	Heterogeneous nuclear ribonucleoprotein M, hnRNP M	1.2933	-0.455012		Q13123	IK	Protein Red, Cytokine IK, IK factor, Protein RER	0.256274	-1.93278
P16989	YBX3	Y-box-binding protein 3, Cold shock domain-containing protein A, DNA-binding protein A, Single-strand DNA-binding protein NF-GMB	0.959988	-1.172		P48651	PTDSS1	Phosphatidylserine synthase 1, PSS-1, PtdSer synthase 1, 2.7.8.29, Serine-exchange enzyme I	0.0347665	-2.75833
P49207	RPL34	60S ribosomal protein L34, Large ribosomal subunit protein eL34	0.739255	-0.923595		Q9C0C2	TNKS1BP1	182 kDa tankyrase-1-binding protein	-0.136899	-2.62026
Q07666	KHDRBS1	KH domain-containing, RNA-binding, signal transduction-associated protein 1, GAP-associated tyrosine phosphoprotein p62, Src-associated in mitosis 68 kDa protein, Sam68, p21 Ras GTPase-activating protein-associated p62, p68	0.823197	-1.48836		O75822	EIF3J	Eukaryotic translation initiation factor 3 subunit J, eIF3j, Eukaryotic translation initiation factor 3 subunit 1, eIF-3-alpha, eIF3 p35	-0.28613	-1.66887
Q00577	PURA	Transcriptional activator protein Pur-alpha, Purine-rich single-stranded DNA-binding protein alpha	0.865046	-2.34573		P52732	KIF11	Kinesin-like protein KIF11, Kinesin-like protein 1, Kinesin-like spindle protein HKSP, Kinesin-related motor protein Eg5, Thyroid receptor-interacting protein 5, TR-interacting protein 5, TRIP-5	-0.72885	-2.53544
P23246	SFPQ	Splicing factor, proline- and glutamine-rich, 100 kDa DNA-pairing protein, hPOMp100, DNA-binding p52/p100 complex, 100 kDa subunit, Polypyrimidine tract-binding protein-associated-splicing factor, PSF, PTB-associated-splicing factor	1.06438	-0.722593		P42166	TMPO	Lamina-associated polypeptide 2, isoform alpha, Thymopoietin isoform alpha, TP alpha, Thymopoietin-related peptide isoform alpha, TPRP isoform alpha	-1.24743	-1.43026
P47914	RPL29	60S ribosomal protein L29, Cell surface heparin-binding protein HIP, Large ribosomal subunit protein eL29	0.664064	-1.09989		Q9H089	LSG1	Large subunit GTPase 1 homolog, hLsg1, 3.6.1.-	-0.0396717	-2.70861
P52597	HNRNPF	Heterogeneous nuclear ribonucleoprotein F, hnRNP F, Nucleolin-like protein mcs94-1	1.17422	-1.04273		Q9NWT1	PAK1IP1	p21-activated protein kinase-interacting protein 1, PAK/PLC-interacting protein 1, hPIP1, PAK1-interacting protein 1, WD repeat-containing protein 84	-0.930328	-2.02887
P83731	RPL24	60S ribosomal protein L24, 60S ribosomal protein L30, Large ribosomal subunit protein eL24	0.313881	-0.911853		Q9Y6K0	CEPT1	Choline/ethanolaminephosphotransferase 1, hCEPT1, 2.7.8.1, 2.7.8.2, 1-alkenyl-2-acylglycerol choline phosphotransferase, 2.7.8.22	0.0670129	-2.99241
Q9UKM9	RALY	RNA-binding protein Raly, Autoantigen p542, Heterogeneous nuclear ribonucleoprotein C-like 2, hnRNP core protein C-like 2, hnRNP associated with lethal yellow protein homolog	1.31076	-1.26774		P40222	TXLNA	Alpha-taxilin	-0.833738	-1.8347
Q8NC51	SERBP1	Plasminogen activator inhibitor 1 RNA-binding protein, PAI1 RNA-binding protein 1, PAI-RBP1, SERPINE1 mRNA-binding protein 1	0.686732	-0.55837		Q9Y295	DRG1	Developmentally-regulated GTP-binding protein 1, DRG-1, Neural precursor cell expressed developmentally down-regulated protein 3, NEDD-3, Translation factor GTPase DRG1, TRAFAC GTPase DRG1, 3.6.5.-	-0.262942	-2.00748
Q96EP5	DAZAP1	DAZ-associated protein 1, Deleted in azoospermia-associated protein 1	0.976306	-1.54404		P82663	MRPS25	28S ribosomal protein S25, mitochondrial, MRP-S25, S25mt, Mitochondrial small ribosomal subunit protein mS25	-0.182448	-2.64392
O75534	CSDE1	Cold shock domain-containing protein E1, N-ras upstream gene protein, Protein UNR	1.14611	-0.987572		Q6NUQ4	TMEM214	Transmembrane protein 214	-0.814857	-2.52826
Q14011	CIRBP	Cold-inducible RNA-binding protein, A18 hnRNP, Glycine-rich RNA-binding protein CIRP	0.874706	-1.95846		P29692	EEF1D	Elongation factor 1-delta, EF-1-delta, Antigen NY-CO-4	-1.50645	-1.34943
P35268	RPL22	60S ribosomal protein L22, EBER-associated protein, EAP, Epstein-Barr virus small RNA-associated protein, Heparin-binding protein HBp15, Large ribosomal subunit protein eL22	0.64444	-0.78685		Q9NRX2	MRPL17	39S ribosomal protein L17, mitochondrial, L17mt, MRP-L17, LYST-interacting protein 2, Mitochondrial large ribosomal subunit protein bL17m	-0.254948	-2.19046
P31943	HNRNPH1	Heterogeneous nuclear ribonucleoprotein H, hnRNP H	1.10977	-0.857531		Q12802	AKAP13	A-kinase anchor protein 13, AKAP-13, AKAP-Lbc, Breast cancer nuclear receptor-binding auxiliary protein, Guanine nucleotide exchange factor Lbc, Human thyroid-anchoring protein 31, Lymphoid blast crisis oncogene, LBC oncogene, Non-oncogenic Rho GTPase-specific GTP exchange factor, Protein kinase A-anchoring protein 13, PRKA13, p47	-0.254519	-2.99799
Q00839	HNRNPU	Heterogeneous nuclear ribonucleoprotein U, hnRNP U, GRIP120, Nuclear p120 ribonucleoprotein, Scaffold-attachment factor A, SAF-A, p120, pp120	0.767511	-0.423801		A1X283	SH3PXD2B	SH3 and PX domain-containing protein 2B, Adapter protein HOFI, Factor for adipocyte differentiation 49, Tyrosine kinase substrate with four SH3 domains	-0.179028	-2.53493
O43390	HNRNPR	Heterogeneous nuclear ribonucleoprotein R, hnRNP R	0.995693	-1.05542		Q9NUQ8	ABCF3	ATP-binding cassette sub-family F member 3	0.000377097	-2.26875
P62841	RPS15	40S ribosomal protein S15, RIG protein, Small ribosomal subunit protein uS19	0.759047	-0.975564		P53582	METAP1	Methionine aminopeptidase 1, MAP 1, MetAP 1, 3.4.11.18, Peptidase M 1	-0.225366	-2.17685
Q01130	SRSF2	Serine/arginine-rich splicing factor 2, Protein PR264, Splicing component, 35 kDa, Splicing factor SC35, SC-35, Splicing factor, arginine/serine-rich 2	0.486847	-1.35139		Q9UG63	ABCF2	ATP-binding cassette sub-family F member 2, Iron-inhibited ABC transporter 2	-0.0849054	-1.62731
Q96I24	FUBP3	Far upstream element-binding protein 3, FUSE-binding protein 3	1.43061	-1.39617		O95602	POLR1A	DNA-directed RNA polymerase I subunit RPA1, RNA polymerase I subunit A1, 2.7.7.6, A190, DNA-directed RNA polymerase I largest subunit, DNA-directed RNA polymerase I subunit A, RNA polymerase I 194 kDa subunit, RPA194	-0.966396	-1.93372
P35637	FUS	RNA-binding protein FUS, 75 kDa DNA-pairing protein, Oncogene FUS, Oncogene TLS, POMp75, Translocated in liposarcoma protein	0.862906	-1.15281		Q13724	MOGS	Mannosyl-oligosaccharide glucosidase, 3.2.1.106, Processing A-glucosidase I	-0.916438	-2.27118
P61353	RPL27	60S ribosomal protein L27, Large ribosomal subunit protein eL27	0.146395	-0.646486		Q9NXF1	TEX10	Testis-expressed protein 10	-0.184748	-2.32667
Q01085	TIAL1	Nucleolysin TIAR, TIA-1-related protein	1.41247	-1.81961		O75340	PDCD6	Programmed cell death protein 6, Apoptosis-linked gene 2 protein homolog, ALG-2	-0.645565	-1.9249
P07910	HNRNPC	Heterogeneous nuclear ribonucleoproteins C1/C2, hnRNP C1/C2	1.01085	-0.43446		Q9P2D0	IBTK	Inhibitor of Bruton tyrosine kinase, IBtk	0.164848	-3.0107
P26599	PTBP1	Polypyrimidine tract-binding protein 1, PTB, 57 kDa RNA-binding protein PPTB-1, Heterogeneous nuclear ribonucleoprotein I, hnRNP I	1.0636	-0.629991		Q5VT52	RPRD2	Regulation of nuclear pre-mRNA domain-containing protein 2	-0.268667	-2.73572
Q14444	CAPRIN1	Caprin-1, Cell cycle-associated protein 1, Cytoplasmic activation- and proliferation-associated protein 1, GPI-anchored membrane protein 1, GPI-anchored protein p137, GPI-p137, p137GPI, Membrane component chromosome 11 surface marker 1, RNA granule protein 105	0.391557	-1.19979		Q9BYW2	SETD2	Histone-lysine N-methyltransferase SETD2, 2.1.1.359, HIF-1, Huntingtin yeast partner B, Huntingtin-interacting protein 1, HIP-1, Huntingtin-interacting protein B, Lysine N-methyltransferase 3A, Protein-lysine N-methyltransferase SETD2, 2.1.1.-, SET domain-containing protein 2, hSET2, p231HBP	-0.546741	-1.62532
P31942	HNRNPH3	Heterogeneous nuclear ribonucleoprotein H3, hnRNP H3, Heterogeneous nuclear ribonucleoprotein 2H9, hnRNP 2H9	1.12706	-1.43179		Q14247	CTTN	Src substrate cortactin, Amplaxin, Oncogene EMS1	-1.11519	-1.48709
O60506	SYNCRIP	Heterogeneous nuclear ribonucleoprotein Q, hnRNP Q, Glycine- and tyrosine-rich RNA-binding protein, GRY-RBP, NS1-associated protein 1, Synaptotagmin-binding, cytoplasmic RNA-interacting protein	1.17469	-0.861727		Q92688	ANP32B	Acidic leucine-rich nuclear phosphoprotein 32 family member B, Acidic protein rich in leucines, Putative HLA-DR-associated protein I-2, PHAPI2, Silver-stainable protein SSP29	-1.00566	-1.51854
Q02543	RPL18A	60S ribosomal protein L18a, Large ribosomal subunit protein eL20	0.746047	-0.881749		O14730	RIOK3	Serine/threonine-protein kinase RIO3, 2.7.11.1, RIO kinase 3, sudD homolog	1.09822	-4.01182
A0AV96	RBM47	RNA-binding protein 47, RNA-binding motif protein 47	1.63833	-2.40687		P46063	RECQL	ATP-dependent DNA helicase Q1, 3.6.4.12, DNA helicase, RecQ-like type 1, RecQ1, DNA-dependent ATPase Q1, RecQ protein-like 1	-1.35391	-1.73817
Q13151	HNRNPA0	Heterogeneous nuclear ribonucleoprotein A0, hnRNP A0	0.846802	-1.37311		Q96T88	UHRF1	E3 ubiquitin-protein ligase UHRF1, 2.3.2.27, Inverted CCAAT box-binding protein of 90 kDa, Nuclear protein 95, Nuclear zinc finger protein Np95, HuNp95, hNp95, RING finger protein 106, RING-type E3 ubiquitin transferase UHRF1, Transcription factor ICBP90, Ubiquitin-like PHD and RING finger domain-containing protein 1, hUHRF1, Ubiquitin-like-containing PHD and RING finger domains protein 1	-1.16141	-2.00224
P62280	RPS11	40S ribosomal protein S11, Small ribosomal subunit protein uS17	0.457221	-0.668591		P33176	KIF5B	Kinesin-1 heavy chain, Conventional kinesin heavy chain, Ubiquitous kinesin heavy chain, UKHC	-1.33232	-1.53778
O76021	RSL1D1	Ribosomal L1 domain-containing protein 1, CATX-11, Cellular senescence-inhibited gene protein, Protein PBK1	0.49157	-0.985999		Q92974	ARHGEF2	Rho guanine nucleotide exchange factor 2, Guanine nucleotide exchange factor H1, GEF-H1, Microtubule-regulated Rho-GEF, Proliferating cell nucleolar antigen p40	-0.558456	-2.31875
Q9GZR2	REXO4	RNA exonuclease 4, 3.1.-.-, Exonuclease XPMC2, Prevents mitotic catastrophe 2 protein homolog, hPMC2	0.326745	-2.48898		Q15084	PDIA6	Protein disulfide-isomerase A6, 5.3.4.1, Endoplasmic reticulum protein 5, ER protein 5, ERp5, Protein disulfide isomerase P5, Thioredoxin domain-containing protein 7	-1.32689	-1.42237
Q14103	HNRNPD	Heterogeneous nuclear ribonucleoprotein D0, hnRNP D0, AU-rich element RNA-binding protein 1	0.755771	-0.999418		Q8WXX5	DNAJC9	DnaJ homolog subfamily C member 9, HDJC9, DnaJ protein SB73	-1.13968	-2.14366
Q15233	NONO	Non-POU domain-containing octamer-binding protein, NonO protein, 54 kDa nuclear RNA- and DNA-binding protein, p54(nrb), p54nrb, 55 kDa nuclear protein, NMT55, DNA-binding p52/p100 complex, 52 kDa subunit	1.1199	-0.863348		P37802	TAGLN2	Transgelin-2, Epididymis tissue protein Li 7e, SM22-alpha homolog	-1.58535	-1.18454
P14866	HNRNPL	Heterogeneous nuclear ribonucleoprotein L, hnRNP L	1.09432	-0.884693		O43776	NARS1	Asparagine--tRNA ligase, cytoplasmic, 6.1.1.22, Asparaginyl-tRNA synthetase, AsnRS, Asparaginyl-tRNA synthetase 1	-0.998393	-1.53183
Q96PK6	RBM14	RNA-binding protein 14, Paraspeckle protein 2, PSP2, RNA-binding motif protein 14, RRM-containing coactivator activator/modulator, Synaptotagmin-interacting protein, SYT-interacting protein	1.07503	-1.43552		P78347	GTF2I	General transcription factor II-I, GTFII-I, TFII-I, Bruton tyrosine kinase-associated protein 135, BAP-135, BTK-associated protein 135, SRF-Phox1-interacting protein, SPIN, Williams-Beuren syndrome chromosomal region 6 protein	-1.25038	-1.57108
P18124	RPL7	60S ribosomal protein L7, Large ribosomal subunit protein uL30	0.165541	-0.537676		P43307	SSR1	Translocon-associated protein subunit alpha, TRAP-alpha, Signal sequence receptor subunit alpha, SSR-alpha	-0.903465	-2.0589
P39019	RPS19	40S ribosomal protein S19, Small ribosomal subunit protein eS19	-0.859285	-0.657541		Q9H7E9	C8orf33	UPF0488 protein C8orf33	-0.727837	-2.17663
Q99729	HNRNPAB	Heterogeneous nuclear ribonucleoprotein A/B, hnRNP A/B, APOBEC1-binding protein 1, ABBP-1	0.870108	-1.29425		Q99661	KIF2C	Kinesin-like protein KIF2C, Kinesin-like protein 6, Mitotic centromere-associated kinesin, MCAK	-0.41734	-2.23871
Q13283	G3BP1	Ras GTPase-activating protein-binding protein 1, G3BP-1, 3.6.4.12, 3.6.4.13, ATP-dependent DNA helicase VIII, hDH VIII, GAP SH3 domain-binding protein 1	0.501959	-1.26716		Q9BQ70	TCF25	Transcription factor 25, TCF-25, Nuclear localized protein 1	0.200826	-3.07424
Q96AE4	FUBP1	Far upstream element-binding protein 1, FBP, FUSE-binding protein 1, DNA helicase V, hDH V	0.786686	-1.20739		Q8IVF2	AHNAK2	Protein AHNAK2	-0.143393	-2.89627
P29558	RBMS1	RNA-binding motif, single-stranded-interacting protein 1, Single-stranded DNA-binding protein MSSP-1, Suppressor of CDC2 with RNA-binding motif 2	0.950944	-2.34907		O75521	ECI2	Enoyl-CoA delta isomerase 2, 5.3.3.8, DRS-1, Delta(3),delta(2)-enoyl-CoA isomerase, D3,D2-enoyl-CoA isomerase, Diazepam-binding inhibitor-related protein 1, DBI-related protein 1, Dodecenoyl-CoA isomerase, Hepatocellular carcinoma-associated antigen 88, Peroxisomal 3,2-trans-enoyl-CoA isomerase, pECI, Renal carcinoma antigen NY-REN-1	-1.33104	-1.91568
Q9HCE1	MOV10	Helicase MOV-10, 3.6.4.13, Armitage homolog, Moloney leukemia virus 10 protein	0.818687	-1.60165		Q12769	NUP160	Nuclear pore complex protein Nup160, 160 kDa nucleoporin, Nucleoporin Nup160	-0.702674	-2.08003
P50914	RPL14	60S ribosomal protein L14, CAG-ISL 7, Large ribosomal subunit protein eL14	0.481842	-0.926765		Q13813	SPTAN1	Spectrin alpha chain, non-erythrocytic 1, Alpha-II spectrin, Fodrin alpha chain, Spectrin, non-erythroid alpha subunit	-0.277997	-1.27342
Q86V81	ALYREF	THO complex subunit 4, Tho4, Ally of AML-1 and LEF-1, Aly/REF export factor, Transcriptional coactivator Aly/REF, bZIP-enhancing factor BEF	0.263401	-1.04488		Q96GW9	MARS2	Methionine--tRNA ligase, mitochondrial, 6.1.1.10, Methionyl-tRNA synthetase 2, Mitochondrial methionyl-tRNA synthetase, MtMetRS	0.403012	-3.62218
P62979	RPS27A	Ubiquitin-40S ribosomal protein S27a, Ubiquitin carboxyl extension protein 80	-0.358288	-0.574283		Q9BRS2	RIOK1	Serine/threonine-protein kinase RIO1, 2.7.11.1, 3.6.3.-, RIO kinase 1	-0.13169	-2.38813
P62750	RPL23A	60S ribosomal protein L23a, Large ribosomal subunit protein uL23	-0.571362	-0.902328		Q9Y2A7	NCKAP1	Nck-associated protein 1, NAP 1, Membrane-associated protein HEM-2, p125Nap1	-1.05671	-2.26834
P84098	RPL19	60S ribosomal protein L19, Large ribosomal subunit protein eL19	-0.0868857	-0.979495		Q9NTK5	OLA1	Obg-like ATPase 1, DNA damage-regulated overexpressed in cancer 45, DOC45, GTP-binding protein 9	-0.594481	-1.77493
Q92879	CELF1	CUGBP Elav-like family member 1, CELF-1, 50 kDa nuclear polyadenylated RNA-binding protein, Bruno-like protein 2, CUG triplet repeat RNA-binding protein 1, CUG-BP1, CUG-BP- and ETR-3-like factor 1, Deadenylation factor CUG-BP, Embryo deadenylation element-binding protein homolog, EDEN-BP homolog, RNA-binding protein BRUNOL-2	1.74587	-1.67862		Q9BX10	GTPBP2	GTP-binding protein 2	0.145339	-3.67752
Q15365	PCBP1	Poly(rC)-binding protein 1, Alpha-CP1, Heterogeneous nuclear ribonucleoprotein E1, hnRNP E1, Nucleic acid-binding protein SUB2.3	0.692985	-0.916993		Q96HC4	PDLIM5	PDZ and LIM domain protein 5, Enigma homolog, Enigma-like PDZ and LIM domains protein	-1.12174	-1.64231
Q8IWA0	WDR75	WD repeat-containing protein 75, U3 small nucleolar RNA-associated protein 17 homolog	0.878885	-1.85164		Q8TDB6	DTX3L	E3 ubiquitin-protein ligase DTX3L, 2.3.2.27, B-lymphoma- and BAL-associated protein, Protein deltex-3-like, RING-type E3 ubiquitin transferase DTX3L, Rhysin-2, Rhysin2	-0.420151	-3.75239
Q9NR30	DDX21	Nucleolar RNA helicase 2, 3.6.4.13, DEAD box protein 21, Gu-alpha, Nucleolar RNA helicase Gu, Nucleolar RNA helicase II, RH II/Gu	0.537008	-0.75393		Q93009	USP7	Ubiquitin carboxyl-terminal hydrolase 7, 3.4.19.12, Deubiquitinating enzyme 7, Herpesvirus-associated ubiquitin-specific protease, Ubiquitin thioesterase 7, Ubiquitin-specific-processing protease 7	-1.0763	-1.83666
P62081	RPS7	40S ribosomal protein S7, Small ribosomal subunit protein eS7	-0.140697	-0.810636		O95613	PCNT	Pericentrin, Kendrin, Pericentrin-B	0.340567	-3.52672
Q7KZF4	SND1	Staphylococcal nuclease domain-containing protein 1, 3.1.31.1, 100 kDa coactivator, EBNA2 coactivator p100, Tudor domain-containing protein 11, p100 co-activator	0.780434	-0.918219		Q8TAE8	GADD45GIP1	Growth arrest and DNA damage-inducible proteins-interacting protein 1, 39S ribosomal protein L59, mitochondrial, MRP-L59, CKII beta-associating protein, CR6-interacting factor 1, CRIF1, Mitochondrial large ribosomal subunit protein mL64, Papillomavirus L2-interacting nuclear protein 1, PLINP, PLINP-1, p53-responsive gene 6 protein	-0.210498	-2.86408
P98179	RBM3	RNA-binding protein 3, RNA-binding motif protein 3, RNPL	0.985136	-1.6046		Q12899	TRIM26	Tripartite motif-containing protein 26, 2.3.2.27, Acid finger protein, AFP, RING finger protein 95, Zinc finger protein 173	-0.449349	-3.18122
Q13310	PABPC4	Polyadenylate-binding protein 4, PABP-4, Poly(A)-binding protein 4, Activated-platelet protein 1, APP-1, Inducible poly(A)-binding protein, iPABP	0.374974	-1.00749		O94874	UFL1	E3 UFM1-protein ligase 1, 2.3.2.-, E3 UFM1-protein transferase 1, Multiple alpha-helix protein located at ER, Novel LZAP-binding protein, Regulator of C53/LZAP and DDRGK1	-0.352132	-3.4363
Q92945	KHSRP	Far upstream element-binding protein 2, FUSE-binding protein 2, KH type-splicing regulatory protein, KSRP, p75	1.54217	-1.15931		O43813	LANCL1	Glutathione S-transferase LANCL1, 2.5.1.18, 40 kDa erythrocyte membrane protein, p40, LanC-like protein 1	-1.19218	-1.94504
Q08211	DHX9	ATP-dependent RNA helicase A, 3.6.4.13, DEAH box protein 9, DExH-box helicase 9, Leukophysin, LKP, Nuclear DNA helicase II, NDH II, RNA helicase A	0.643424	-0.753926		Q9Y4W6	AFG3L2	AFG3-like protein 2, 3.4.24.-, Paraplegin-like protein	0.0274583	-2.10194
P62753	RPS6	40S ribosomal protein S6, Phosphoprotein NP33, Small ribosomal subunit protein eS6	0.167391	-0.770199		Q14146	URB2	Unhealthy ribosome biogenesis protein 2 homolog	-0.825141	-2.75602
P46783	RPS10	40S ribosomal protein S10, Small ribosomal subunit protein eS10	-0.10929	-1.15993		P49419	ALDH7A1	Alpha-aminoadipic semialdehyde dehydrogenase, Alpha-AASA dehydrogenase, 1.2.1.31, Aldehyde dehydrogenase family 7 member A1, 1.2.1.3, Antiquitin-1, Betaine aldehyde dehydrogenase, 1.2.1.8, Delta1-piperideine-6-carboxylate dehydrogenase, P6c dehydrogenase	-1.37346	-2.12859
P62995	TRA2B	Transformer-2 protein homolog beta, TRA-2 beta, TRA2-beta, hTRA2-beta, Splicing factor, arginine/serine-rich 10, Transformer-2 protein homolog B	0.374439	-1.45344		Q14980	NUMA1	Nuclear mitotic apparatus protein 1, Nuclear matrix protein-22, NMP-22, Nuclear mitotic apparatus protein, NuMA protein, SP-H antigen	-0.951261	-1.84318
P23396	RPS3	40S ribosomal protein S3, 4.2.99.18, Small ribosomal subunit protein uS3	0.0749479	-0.43014		Q9Y2T2	AP3M1	AP-3 complex subunit mu-1, AP-3 adaptor complex mu3A subunit, Adaptor-related protein complex 3 subunit mu-1, Mu-adaptin 3A, Mu3A-adaptin	-0.514895	-2.05049
P11940	PABPC1	Polyadenylate-binding protein 1, PABP-1, Poly(A)-binding protein 1	0.497337	-0.66293		P31689	DNAJA1	DnaJ homolog subfamily A member 1, DnaJ protein homolog 2, HSDJ, Heat shock 40 kDa protein 4, Heat shock protein J2, HSJ-2, Human DnaJ protein 2, hDj-2	-1.37003	-1.28124
P43243	MATR3	Matrin-3	0.773796	-0.94961		P49454	CENPF	Centromere protein F, CENP-F, AH antigen, Kinetochore protein CENPF, Mitosin	-0.232266	-3.31267
P40429	RPL13A	60S ribosomal protein L13a, 23 kDa highly basic protein, Large ribosomal subunit protein uL13	-0.0243376	-0.994964		O15067	PFAS	Phosphoribosylformylglycinamidine synthase, FGAM synthase, FGAMS, 6.3.5.3, Formylglycinamide ribonucleotide amidotransferase, FGAR amidotransferase, FGAR-AT, Formylglycinamide ribotide amidotransferase, Phosphoribosylformylglycineamide amidotransferase	-1.45952	-1.54137
Q5T6F2	UBAP2	Ubiquitin-associated protein 2, UBAP-2, RNA polymerase II degradation factor UBAP2	1.00193	-2.30017		P61221	ABCE1	ATP-binding cassette sub-family E member 1, 2'-5'-oligoadenylate-binding protein, HuHP68, RNase L inhibitor, Ribonuclease 4 inhibitor, RNS4I	-1.48976	-1.88167
P55795	HNRNPH2	Heterogeneous nuclear ribonucleoprotein H2, hnRNP H2, FTP-3, Heterogeneous nuclear ribonucleoprotein H', hnRNP H'	1.10288	-1.86541		P49406	MRPL19	39S ribosomal protein L19, mitochondrial, L19mt, MRP-L19, 39S ribosomal protein L15, mitochondrial, L15mt, MRP-L15, Mitochondrial large ribosomal subunit protein bL19m	-0.780054	-2.25687
Q01844	EWSR1	RNA-binding protein EWS, EWS oncogene, Ewing sarcoma breakpoint region 1 protein	0.503767	-1.61961		Q96DV4	MRPL38	39S ribosomal protein L38, mitochondrial, L38mt, MRP-L38, Mitochondrial large ribosomal subunit protein mL38	-0.27093	-2.63858
Q15366	PCBP2	Poly(rC)-binding protein 2, Alpha-CP2, Heterogeneous nuclear ribonucleoprotein E2, hnRNP E2	0.499513	-1.34362		O60716	CTNND1	Catenin delta-1, Cadherin-associated Src substrate, CAS, p120 catenin, p120(ctn), p120(cas)	-0.573121	-2.14742
Q15434	RBMS2	RNA-binding motif, single-stranded-interacting protein 2, Suppressor of CDC2 with RNA-binding motif 3	1.53731	-3.40182		P06744	GPI	Glucose-6-phosphate isomerase, GPI, 5.3.1.9, Autocrine motility factor, AMF, Neuroleukin, NLK, Phosphoglucose isomerase, PGI, Phosphohexose isomerase, PHI, Sperm antigen 36, SA-36	0.0516888	-0.832084
O00571	DDX3X	ATP-dependent RNA helicase DDX3X, 3.6.4.13, CAP-Rf, DEAD box protein 3, X-chromosomal, DEAD box, X isoform, DBX, Helicase-like protein 2, HLP2	0.570379	-0.912045		Q9Y450	HBS1L	HBS1-like protein, ERFS	-0.682085	-2.88631
Q9Y4C8	RBM19	Probable RNA-binding protein 19, RNA-binding motif protein 19	0.815056	-1.52847		Q9HCS7	XAB2	Pre-mRNA-splicing factor SYF1, Protein HCNP, XPA-binding protein 2	-1.0823	-2.01196
P62910	RPL32	60S ribosomal protein L32, Large ribosomal subunit protein eL32	-0.443351	-1.18217		P02545	LMNA	Prelamin-A/C	-1.7441	-0.550681
Q92841	DDX17	Probable ATP-dependent RNA helicase DDX17, 3.6.4.13, DEAD box protein 17, DEAD box protein p72, DEAD box protein p82, RNA-dependent helicase p72	0.521535	-1.28301		P35573	AGL	Glycogen debranching enzyme, Glycogen debrancher, 4-alpha-glucanotransferase, 2.4.1.25, Oligo-1,4-1,4-glucantransferase, Amylo-alpha-1,6-glucosidase, Amylo-1,6-glucosidase, 3.2.1.33, Dextrin 6-alpha-D-glucosidase	-1.07937	-1.57941
O15371	EIF3D	Eukaryotic translation initiation factor 3 subunit D, eIF3d, Eukaryotic translation initiation factor 3 subunit 7, eIF-3-zeta, eIF3 p66	0.253434	-1.3265		Q70E73	RAPH1	Ras-associated and pleckstrin homology domains-containing protein 1, RAPH1, Amyotrophic lateral sclerosis 2 chromosomal region candidate gene 18 protein, Amyotrophic lateral sclerosis 2 chromosomal region candidate gene 9 protein, Lamellipodin, Proline-rich EVH1 ligand 2, PREL-2, Protein RMO1	-0.426393	-3.42707
P51114	FXR1	RNA-binding protein FXR1, FMR1 autosomal homolog 1, hFXR1p	0.389742	-1.64204		Q14CX7	NAA25	N-alpha-acetyltransferase 25, NatB auxiliary subunit, Mitochondrial distribution and morphology protein 20, N-terminal acetyltransferase B complex subunit MDM20, NatB complex subunit MDM20, N-terminal acetyltransferase B complex subunit NAA25, p120	-0.880323	-2.16041
Q13595	TRA2A	Transformer-2 protein homolog alpha, TRA-2 alpha, TRA2-alpha, Transformer-2 protein homolog A	0.286746	-1.81118		Q16531	DDB1	DNA damage-binding protein 1, DDB p127 subunit, DNA damage-binding protein a, DDBa, Damage-specific DNA-binding protein 1, HBV X-associated protein 1, XAP-1, UV-damaged DNA-binding factor, UV-damaged DNA-binding protein 1, UV-DDB 1, XPE-binding factor, XPE-BF, Xeroderma pigmentosum group E-complementing protein, XPCe	-1.58159	-1.25334
P05455	SSB	Lupus La protein, La autoantigen, La ribonucleoprotein, Sjoegren syndrome type B antigen, SS-B	0.483401	-1.4811		P54132	BLM	RecQ-like DNA helicase BLM, 3.6.4.12, Bloom syndrome protein, DNA helicase, RecQ-like type 2, RecQ2, RecQ protein-like 3	-0.286915	-3.36539
Q96CM3	RPUSD4	Pseudouridylate synthase RPUSD4, mitochondrial, 5.4.99.-, RNA pseudouridylate synthase domain-containing protein 4	0.943135	-3.00402		A6NHR9	SMCHD1	Structural maintenance of chromosomes flexible hinge domain-containing protein 1, SMC hinge domain-containing protein 1, 3.6.1.-	-1.15943	-2.15834
P62269	RPS18	40S ribosomal protein S18, Ke-3, Ke3, Small ribosomal subunit protein uS13	-0.420079	-0.694763		Q86XL3	ANKLE2	Ankyrin repeat and LEM domain-containing protein 2, LEM domain-containing protein 4	-0.0503274	-2.81934
P31483	TIA1	Cytotoxic granule associated RNA binding protein TIA1, Nucleolysin TIA-1 isoform p40, RNA-binding protein TIA-1, T-cell-restricted intracellular antigen-1, TIA-1, p40-TIA-1	1.32918	-2.33356		Q9NSV4	DIAPH3	Protein diaphanous homolog 3, Diaphanous-related formin-3, DRF3, MDia2	0.176857	-3.05094
P62847	RPS24	40S ribosomal protein S24, Small ribosomal subunit protein eS24	0.716176	-1.33065		Q63HN8	RNF213	E3 ubiquitin-protein ligase RNF213, 2.3.2.27, 3.6.4.-, ALK lymphoma oligomerization partner on chromosome 17, E3 ubiquitin-lipopolysaccharide ligase RNF213, 2.3.2.-, Mysterin, RING finger protein 213	-0.717072	-2.29503
Q9BZE4	GTPBP4	GTP-binding protein 4, Chronic renal failure gene protein, GTP-binding protein NGB, Nucleolar GTP-binding protein 1	0.314854	-1.30903		Q12789	GTF3C1	General transcription factor 3C polypeptide 1, TF3C-alpha, TFIIIC box B-binding subunit, Transcription factor IIIC 220 kDa subunit, TFIIIC 220 kDa subunit, TFIIIC220, Transcription factor IIIC subunit alpha	-0.986506	-2.57667
Q8TDD1	DDX54	ATP-dependent RNA helicase DDX54, 3.6.4.13, ATP-dependent RNA helicase DP97, DEAD box RNA helicase 97 kDa, DEAD box protein 54	0.51026	-1.30055		P46734	MAP2K3	Dual specificity mitogen-activated protein kinase kinase 3, MAP kinase kinase 3, MAPKK 3, 2.7.12.2, MAPK/ERK kinase 3, MEK 3, Stress-activated protein kinase kinase 2, SAPK kinase 2, SAPKK-2, SAPKK2	-0.742491	-2.44569
Q8WXF1	PSPC1	Paraspeckle component 1, Paraspeckle protein 1	1.07382	-2.12656		Q96E11	MRRF	Ribosome-recycling factor, mitochondrial, RRF, Ribosome-releasing factor, mitochondrial	-1.36782	-2.34375
P17844	DDX5	Probable ATP-dependent RNA helicase DDX5, 3.6.4.13, DEAD box protein 5, RNA helicase p68	0.652701	-0.7689		P28288	ABCD3	ATP-binding cassette sub-family D member 3, 3.1.2.-, 7.6.2.-, 70 kDa peroxisomal membrane protein, PMP70	-1.93454	-1.59647
Q96QC0	PPP1R10	Serine/threonine-protein phosphatase 1 regulatory subunit 10, MHC class I region proline-rich protein CAT53, PP1-binding protein of 114 kDa, Phosphatase 1 nuclear targeting subunit, Protein FB19, p99	0.84024	-2.42323		Q14674	ESPL1	Separin, 3.4.22.49, Caspase-like protein ESPL1, Extra spindle poles-like 1 protein, Separase	0.0381335	-3.59907
Q9ULW3	ABT1	Activator of basal transcription 1, hABT1, Basal transcriptional activator	0.478474	-2.61631		P06493	CDK1	Cyclin-dependent kinase 1, CDK1, 2.7.11.22, 2.7.11.23, Cell division control protein 2 homolog, Cell division protein kinase 1, p34 protein kinase	-1.70217	-1.15844
P08708	RPS17	40S ribosomal protein S17, Small ribosomal subunit protein eS17	-0.35491	-0.822279		Q5SW79	CEP170	Centrosomal protein of 170 kDa, Cep170, KARP-1-binding protein, KARP1-binding protein	-0.824248	-3.30297
Q99848	EBNA1BP2	Probable rRNA-processing protein EBP2, EBNA1-binding protein 2, Nucleolar protein p40	0.306633	-1.38838		O14578	CIT	Citron Rho-interacting kinase, CRIK, 2.7.11.1, Serine/threonine-protein kinase 21	0.719413	-3.73977
P39023	RPL3	60S ribosomal protein L3, HIV-1 TAR RNA-binding protein B, TARBP-B, Large ribosomal subunit protein uL3	-0.149362	-0.543413		Q9C0D5	TANC1	Protein TANC1, Tetratricopeptide repeat, ankyrin repeat and coiled-coil domain-containing protein 1	-0.0596748	-3.14506
Q9UN86	G3BP2	Ras GTPase-activating protein-binding protein 2, G3BP-2, GAP SH3 domain-binding protein 2	0.418481	-1.62907		Q14008	CKAP5	Cytoskeleton-associated protein 5, Colonic and hepatic tumor overexpressed gene protein, Ch-TOG	-0.706463	-2.04338
P62263	RPS14	40S ribosomal protein S14, Small ribosomal subunit protein uS11	-0.271965	-0.754576		Q13200	PSMD2	26S proteasome non-ATPase regulatory subunit 2, 26S proteasome regulatory subunit RPN1, 26S proteasome regulatory subunit S2, 26S proteasome subunit p97, Protein 55.11, Tumor necrosis factor type 1 receptor-associated protein 2	-1.52436	-1.34163
Q12905	ILF2	Interleukin enhancer-binding factor 2, Nuclear factor of activated T-cells 45 kDa	0.178263	-1.46117		P24752	ACAT1	Acetyl-CoA acetyltransferase, mitochondrial, 2.3.1.9, Acetoacetyl-CoA thiolase, T2	-1.41275	-1.56981
Q9BUJ2	HNRNPUL1	Heterogeneous nuclear ribonucleoprotein U-like protein 1, Adenovirus early region 1B-associated protein 5, E1B-55 kDa-associated protein 5, E1B-AP5	0.282305	-1.19725		P33981	TTK	Dual specificity protein kinase TTK, 2.7.12.1, Phosphotyrosine picked threonine-protein kinase, PYT	-0.0930974	-3.27457
Q13242	SRSF9	Serine/arginine-rich splicing factor 9, Pre-mRNA-splicing factor SRp30C, Splicing factor, arginine/serine-rich 9	0.612653	-1.95933		P00367	GLUD1	Glutamate dehydrogenase 1, mitochondrial, GDH 1, 1.4.1.3	-1.40124	-1.45848
P62241	RPS8	40S ribosomal protein S8, Small ribosomal subunit protein eS8	-0.476201	-0.619859		Q8WYP5	AHCTF1	Protein ELYS, Embryonic large molecule derived from yolk sac, Protein MEL-28, Putative AT-hook-containing transcription factor 1	-1.34697	-2.01735
Q86UE4	MTDH	Protein LYRIC, 3D3/LYRIC, Astrocyte elevated gene-1 protein, AEG-1, Lysine-rich CEACAM1 co-isolated protein, Metadherin, Metastasis adhesion protein	0.095666	-1.9284		Q8IWC1	MAP7D3	MAP7 domain-containing protein 3	-0.68256	-3.17818
Q9BQG0	MYBBP1A	Myb-binding protein 1A	0.287587	-1.12148		Q12800	TFCP2	Alpha-globin transcription factor CP2, SAA3 enhancer factor, Transcription factor LSF	-1.09421	-2.62486
O43865	AHCYL1	S-adenosylhomocysteine hydrolase-like protein 1, DC-expressed AHCY-like molecule, IP(3)Rs binding protein released with IP(3), IRBIT, Putative adenosylhomocysteinase 2, S-adenosyl-L-homocysteine hydrolase 2, AdoHcyase 2	-0.748447	-0.128598		P0CW18	PRSS56	Serine protease 56, 3.4.21.-	-1.06493	-1.61796
Q12926	ELAVL2	ELAV-like protein 2, ELAV-like neuronal protein 1, Hu-antigen B, HuB, Nervous system-specific RNA-binding protein Hel-N1	0.608032	-1.79771		Q9BT17	MTG1	Mitochondrial ribosome-associated GTPase 1, GTP-binding protein 7, Mitochondrial GTPase 1	-0.186342	-3.53464
P14678	SNRPB	Small nuclear ribonucleoprotein-associated proteins B and B', snRNP-B, Sm protein B/B', Sm-B/B', SmB/B'	-0.0242727	-1.39779		P10515	DLAT	Dihydrolipoyllysine-residue acetyltransferase component of pyruvate dehydrogenase complex, mitochondrial, 2.3.1.12, 70 kDa mitochondrial autoantigen of primary biliary cirrhosis, PBC, Dihydrolipoamide acetyltransferase component of pyruvate dehydrogenase complex, M2 antigen complex 70 kDa subunit, Pyruvate dehydrogenase complex component E2, PDC-E2, PDCE2	-0.850431	-2.01434
Q13247	SRSF6	Serine/arginine-rich splicing factor 6, Pre-mRNA-splicing factor SRP55, Splicing factor, arginine/serine-rich 6	0.465147	-1.0007		Q86TU7	SETD3	Actin-histidine N-methyltransferase, 2.1.1.85, Protein-L-histidine N-tele-methyltransferase, SET domain-containing protein 3, hSETD3	-1.24932	-2.86916
Q13823	GNL2	Nucleolar GTP-binding protein 2, Autoantigen NGP-1	0.671379	-1.75106		Q9UDY2	TJP2	Tight junction protein ZO-2, Tight junction protein 2, Zona occludens protein 2, Zonula occludens protein 2	-1.11434	-2.24204
P09012	SNRPA	U1 small nuclear ribonucleoprotein A, U1 snRNP A, U1-A, U1A	-0.34904	-1.55879		Q9Y3B9	RRP15	RRP15-like protein, Ribosomal RNA-processing protein 15	-0.532897	-1.92962
Q92900	UPF1	Regulator of nonsense transcripts 1, 3.6.4.12, 3.6.4.13, ATP-dependent helicase RENT1, Nonsense mRNA reducing factor 1, NORF1, Up-frameshift suppressor 1 homolog, hUpf1	0.62185	-1.39672		Q6P2E9	EDC4	Enhancer of mRNA-decapping protein 4, Autoantigen Ge-1, Autoantigen RCD-8, Human enhancer of decapping large subunit, Hedls	-1.37921	-2.339
Q9NV06	DCAF13	DDB1- and CUL4-associated factor 13, WD repeat and SOF domain-containing protein 1	0.723073	-2.24899		Q9HD20	ATP13A1	Endoplasmic reticulum transmembrane helix translocase, 7.4.2.-, Endoplasmic reticulum P5A-ATPase	-0.879045	-2.67548
Q9NY93	DDX56	Probable ATP-dependent RNA helicase DDX56, 3.6.4.13, ATP-dependent 61 kDa nucleolar RNA helicase, DEAD box protein 21, DEAD box protein 56	0.78978	-2.13994		O60333	KIF1B	Kinesin-like protein KIF1B, Klp	0.118496	-3.82451
Q02878	RPL6	60S ribosomal protein L6, Large ribosomal subunit protein eL6, Neoplasm-related protein C140, Tax-responsive enhancer element-binding protein 107, TaxREB107	-0.26555	-0.627243		O95299	NDUFA10	NADH dehydrogenase [ubiquinone] 1 alpha subcomplex subunit 10, mitochondrial, Complex I-42kD, CI-42kD, NADH-ubiquinone oxidoreductase 42 kDa subunit	-1.21582	-2.51493
P62888	RPL30	60S ribosomal protein L30, Large ribosomal subunit protein eL30	-0.385213	-0.851115		Q6P1N0	CC2D1A	Coiled-coil and C2 domain-containing protein 1A, Akt kinase-interacting protein 1, Five prime repressor element under dual repression-binding protein 1, FRE under dual repression-binding protein 1, Freud-1, Putative NF-kappa-B-activating protein 023N	-0.593117	-3.28124
O75179	ANKRD17	Ankyrin repeat domain-containing protein 17, Gene trap ankyrin repeat protein, Serologically defined breast cancer antigen NY-BR-16	0.892302	-2.36132		Q8WXH0	SYNE2	Nesprin-2, KASH domain-containing protein 2, KASH2, Nuclear envelope spectrin repeat protein 2, Nucleus and actin connecting element protein, Protein NUANCE, Synaptic nuclear envelope protein 2, Syne-2	0.161778	-2.74945
Q8NDT2	RBM15B	Putative RNA-binding protein 15B, One-twenty two protein 3, HsOTT3, HuOTT3, RNA-binding motif protein 15B	1.37013	-2.90694		O60566	BUB1B	Mitotic checkpoint serine/threonine-protein kinase BUB1 beta, 2.7.11.1, MAD3/BUB1-related protein kinase, hBUBR1, Mitotic checkpoint kinase MAD3L, Protein SSK1	-0.670359	-2.98649
P27816	MAP4	Microtubule-associated protein 4, MAP-4	0.369753	-1.06173		O14802	POLR3A	DNA-directed RNA polymerase III subunit RPC1, RNA polymerase III subunit C1, 2.7.7.6, DNA-directed RNA polymerase III largest subunit, DNA-directed RNA polymerase III subunit A, RNA polymerase III 155 kDa subunit, RPC155, RNA polymerase III subunit C160	-0.263096	-3.27784
Q6P2Q9	PRPF8	Pre-mRNA-processing-splicing factor 8, 220 kDa U5 snRNP-specific protein, PRP8 homolog, Splicing factor Prp8, p220	0.412968	-1.05075		Q9NZM1	MYOF	Myoferlin, Fer-1-like protein 3	-1.1357	-1.38001
P62633	CNBP	CCHC-type zinc finger nucleic acid binding protein, Cellular nucleic acid-binding protein, CNBP, Zinc finger protein 9	0.363411	-1.60083		Q6P1X5	TAF2	Transcription initiation factor TFIID subunit 2, 150 kDa cofactor of initiator function, RNA polymerase II TBP-associated factor subunit B, TBP-associated factor 150 kDa, Transcription initiation factor TFIID 150 kDa subunit, TAF(II)150, TAFII-150, TAFII150	-0.294323	-3.66946
O95758	PTBP3	Polypyrimidine tract-binding protein 3, Regulator of differentiation 1, Rod1	1.24257	-2.3908		Q53EZ4	CEP55	Centrosomal protein of 55 kDa, Cep55, Up-regulated in colon cancer 6	-0.567881	-3.44785
Q8TED0	UTP15	U3 small nucleolar RNA-associated protein 15 homolog	0.717945	-1.9305		Q92621	NUP205	Nuclear pore complex protein Nup205, 205 kDa nucleoporin, Nucleoporin Nup205	-1.37539	-1.82492
P26368	U2AF2	Splicing factor U2AF 65 kDa subunit, U2 auxiliary factor 65 kDa subunit, hU2AF(65), hU2AF65, U2 snRNP auxiliary factor large subunit	0.796957	-1.50135		P52701	MSH6	DNA mismatch repair protein Msh6, hMSH6, G/T mismatch-binding protein, GTBP, GTMBP, MutS protein homolog 6, MutS-alpha 160 kDa subunit, p160	-1.23382	-1.6424
Q6DKI1	RPL7L1	60S ribosomal protein L7-like 1, Large ribosomal subunit protein uL30-like 1	0.275203	-1.77493		Q4G0N4	NADK2	NAD kinase 2, mitochondrial, 2.7.1.23, Mitochondrial NAD kinase, NAD kinase domain-containing protein 1, mitochondrial	-0.86549	-2.23625
P36578	RPL4	60S ribosomal protein L4, 60S ribosomal protein L1, Large ribosomal subunit protein uL4	0.501429	-0.4438		P11310	ACADM	Medium-chain specific acyl-CoA dehydrogenase, mitochondrial, 1.3.8.7	-1.46719	-1.49783
P46776	RPL27A	60S ribosomal protein L27a, Large ribosomal subunit protein uL15	-0.309396	-1.02923		Q8N3U4	STAG2	Cohesin subunit SA-2, SCC3 homolog 2, Stromal antigen 2	-1.98966	-2.11384
Q8TDN6	BRIX1	Ribosome biogenesis protein BRX1 homolog, Brix domain-containing protein 2	-0.111102	-1.23531		Q9ULT8	HECTD1	E3 ubiquitin-protein ligase HECTD1, 2.3.2.26, E3 ligase for inhibin receptor, EULIR, HECT domain-containing protein 1	-1.14264	-2.35756
Q14690	PDCD11	Protein RRP5 homolog, NF-kappa-B-binding protein, NFBP, Programmed cell death protein 11	0.651272	-1.43027		P21359	NF1	Neurofibromin, Neurofibromatosis-related protein NF-1	-0.735774	-3.48677
P62424	RPL7A	60S ribosomal protein L7a, Large ribosomal subunit protein eL8, PLA-X polypeptide, Surfeit locus protein 3	-0.686764	-0.49844		P27144	AK4	Adenylate kinase 4, mitochondrial, AK 4, 2.7.4.10, 2.7.4.6, Adenylate kinase 3-like, GTP:AMP phosphotransferase AK4	-1.90527	-2.06447
Q8WWM7	ATXN2L	Ataxin-2-like protein, Ataxin-2 domain protein, Ataxin-2-related protein	0.4937	-2.04237		Q12965	MYO1E	Unconventional myosin-Ie, Myosin-Ic, Unconventional myosin 1E	-1.36688	-1.64247
Q14152	EIF3A	Eukaryotic translation initiation factor 3 subunit A, eIF3a, Eukaryotic translation initiation factor 3 subunit 10, eIF-3-theta, eIF3 p167, eIF3 p180, eIF3 p185	0.519576	-0.895077		P11177	PDHB	Pyruvate dehydrogenase E1 component subunit beta, mitochondrial, PDHE1-B, 1.2.4.1	-1.38638	-2.13734
Q5BKZ1	ZNF326	DBIRD complex subunit ZNF326, Zinc finger protein 326, Zinc finger protein interacting with mRNPs and DBC1	0.568749	-1.66171		P08559	PDHA1	Pyruvate dehydrogenase E1 component subunit alpha, somatic form, mitochondrial, 1.2.4.1, PDHE1-A type I	-1.38148	-1.77688
Q9Y520	PRRC2C	Protein PRRC2C, BAT2 domain-containing protein 1, HBV X-transactivated gene 2 protein, HBV XAg-transactivated protein 2, HLA-B-associated transcript 2-like 2, Proline-rich and coiled-coil-containing protein 2C	0.840898	-1.74491		P05023	ATP1A1	Sodium/potassium-transporting ATPase subunit alpha-1, Na(+)/K(+) ATPase alpha-1 subunit, 7.2.2.13, Sodium pump subunit alpha-1	-1.68349	-0.997859
Q9GZT3	SLIRP	SRA stem-loop-interacting RNA-binding protein, mitochondrial	0.382156	-1.54348		P13804	ETFA	Electron transfer flavoprotein subunit alpha, mitochondrial, Alpha-ETF	-1.83961	-1.7481
Q9UQ80	PA2G4	Proliferation-associated protein 2G4, Cell cycle protein p38-2G4 homolog, hG4-1, ErbB3-binding protein 1	0.223416	-0.784754		Q86TC9	MYPN	Myopalladin, 145 kDa sarcomeric protein	-0.963207	-2.59628
Q15427	SF3B4	Splicing factor 3B subunit 4, Pre-mRNA-splicing factor SF3b 49 kDa subunit, Spliceosome-associated protein 49, SAP 49	0.969541	-2.70094		Q9P265	DIP2B	Disco-interacting protein 2 homolog B, DIP2 homolog B	-1.15458	-2.40639
Q14671	PUM1	Pumilio homolog 1, HsPUM, Pumilio-1	1.30391	-2.07298		Q9P2J5	LARS1	Leucine--tRNA ligase, cytoplasmic, 6.1.1.4, Leucyl-tRNA synthetase, LeuRS	-1.42468	-1.42684
P51116	FXR2	RNA-binding protein FXR2, FXR2P, FMR1 autosomal homolog 2	0.569439	-2.26367		Q03001	DST	Dystonin, 230 kDa bullous pemphigoid antigen, 230/240 kDa bullous pemphigoid antigen, Bullous pemphigoid antigen 1, BPA, Bullous pemphigoid antigen, Dystonia musculorum protein, Hemidesmosomal plaque protein	-0.361233	-3.03494
Q9BX40	LSM14B	Protein LSM14 homolog B, RNA-associated protein 55B, hRAP55B	0.413111	-3.14634		Q99798	ACO2	Aconitate hydratase, mitochondrial, Aconitase, 4.2.1.3, Citrate hydro-lyase	-1.21459	-1.85281
P11387	TOP1	DNA topoisomerase 1, 5.6.2.1, DNA topoisomerase I	-0.136538	-1.46682		Q96I59	NARS2	Probable asparagine--tRNA ligase, mitochondrial, 6.1.1.22, Asparaginyl-tRNA synthetase, AsnRS	-0.888742	-3.06067
Q8IY67	RAVER1	Ribonucleoprotein PTB-binding 1, Protein raver-1	1.05313	-2.49685		P31040	SDHA	Succinate dehydrogenase [ubiquinone] flavoprotein subunit, mitochondrial, 1.3.5.1, Flavoprotein subunit of complex II, Fp	-1.53413	-1.67354
P46782	RPS5	40S ribosomal protein S5, Small ribosomal subunit protein uS7	-0.273875	-0.923813		Q8WUM0	NUP133	Nuclear pore complex protein Nup133, 133 kDa nucleoporin, Nucleoporin Nup133	-1.0868	-2.13896
Q9NZI8	IGF2BP1	Insulin-like growth factor 2 mRNA-binding protein 1, IGF2 mRNA-binding protein 1, IMP-1, IMP1, Coding region determinant-binding protein, CRD-BP, IGF-II mRNA-binding protein 1, VICKZ family member 1, Zipcode-binding protein 1, ZBP-1	0.853034	-1.5014		P26640	VARS1	Valine--tRNA ligase, 6.1.1.9, Protein G7a, Valyl-tRNA synthetase, ValRS	-1.01838	-1.18253
Q00341	HDLBP	Vigilin, High density lipoprotein-binding protein, HDL-binding protein	0.52681	-1.2574		O95373	IPO7	Importin-7, Imp7, Ran-binding protein 7, RanBP7	-1.00736	-1.13632
Q8IX01	SUGP2	SURP and G-patch domain-containing protein 2, Arginine/serine-rich-splicing factor 14, Splicing factor, arginine/serine-rich 14	0.673874	-2.12519		Q6RFH5	WDR74	WD repeat-containing protein 74, NOP seven-associated protein 1	-0.959398	-2.58698
Q9BVJ6	UTP14A	U3 small nucleolar RNA-associated protein 14 homolog A, Antigen NY-CO-16, Serologically defined colon cancer antigen 16	0.66639	-1.89466		O15357	INPPL1	Phosphatidylinositol 3,4,5-trisphosphate 5-phosphatase 2, 3.1.3.86, Inositol polyphosphate phosphatase-like protein 1, INPPL-1, Protein 51C, SH2 domain-containing inositol 5'-phosphatase 2, SH2 domain-containing inositol phosphatase 2, SHIP-2	-0.249462	-2.69659
Q14692	BMS1	Ribosome biogenesis protein BMS1 homolog, Ribosome assembly protein BMS1 homolog	0.893705	-1.73072		Q92878	RAD50	DNA repair protein RAD50, hRAD50, 3.6.-.-	-1.4168	-1.87543
Q96E39	RBMXL1	RNA binding motif protein, X-linked-like-1, Heterogeneous nuclear ribonucleoprotein G-like 1	0.812525	-2.38447		P11021	HSPA5	Endoplasmic reticulum chaperone BiP, 3.6.4.10, 78 kDa glucose-regulated protein, GRP-78, Binding-immunoglobulin protein, BiP, Heat shock protein 70 family protein 5, HSP70 family protein 5, Heat shock protein family A member 5, Immunoglobulin heavy chain-binding protein	-1.7069	-0.519634
Q52LJ0	FAM98B	Protein FAM98B	0.207276	-2.34105		P31930	UQCRC1	Cytochrome b-c1 complex subunit 1, mitochondrial, Complex III subunit 1, Core protein I, Ubiquinol-cytochrome-c reductase complex core protein 1	-1.08449	-1.78171
Q9UGR2	ZC3H7B	Zinc finger CCCH domain-containing protein 7B, Rotavirus 'X'-associated non-structural protein, RoXaN	0.878415	-2.40192		P49748	ACADVL	Very long-chain specific acyl-CoA dehydrogenase, mitochondrial, VLCAD, 1.3.8.9	-1.69044	-1.60448
P46778	RPL21	60S ribosomal protein L21, Large ribosomal subunit protein eL21	-0.508198	-0.972332		Q13501	SQSTM1	Sequestosome-1, EBI3-associated protein of 60 kDa, EBIAP, p60, Phosphotyrosine-independent ligand for the Lck SH2 domain of 62 kDa, Ubiquitin-binding protein p62	-1.24629	-1.83886
Q9UHX1	PUF60	Poly(U)-binding-splicing factor PUF60, 60 kDa poly(U)-binding-splicing factor, FUSE-binding protein-interacting repressor, FBP-interacting repressor, Ro-binding protein 1, RoBP1, Siah-binding protein 1, Siah-BP1	0.593771	-1.66467		Q96KG9	SCYL1	N-terminal kinase-like protein, Coated vesicle-associated kinase of 90 kDa, SCY1-like protein 1, Telomerase regulation-associated protein, Telomerase transcriptional element-interacting factor, Teratoma-associated tyrosine kinase	-0.942251	-2.64755
Q8IXT5	RBM12B	RNA-binding protein 12B, RNA-binding motif protein 12B	1.23855	-2.79594		Q9Y399	MRPS2	28S ribosomal protein S2, mitochondrial, MRP-S2, S2mt, Mitochondrial small ribosomal subunit protein uS2m	-0.999626	-2.40776
O60832	DKC1	H/ACA ribonucleoprotein complex subunit DKC1, 5.4.99.-, CBF5 homolog, Dyskerin, Nopp140-associated protein of 57 kDa, Nucleolar protein NAP57, Nucleolar protein family A member 4, snoRNP protein DKC1	0.282601	-1.53399		P23258	TUBG1	Tubulin gamma-1 chain, Gamma-1-tubulin, Gamma-tubulin complex component 1, GCP-1	-1.26818	-2.12275
Q16629	SRSF7	Serine/arginine-rich splicing factor 7, Splicing factor 9G8, Splicing factor, arginine/serine-rich 7	0.69195	-1.15955		Q9NZN5	ARHGEF12	Rho guanine nucleotide exchange factor 12, Leukemia-associated RhoGEF	-0.474997	-3.7469
P67809	YBX1	Y-box-binding protein 1, YB-1, CCAAT-binding transcription factor I subunit A, CBF-A, DNA-binding protein B, DBPB, Enhancer factor I subunit A, EFI-A, Nuclease-sensitive element-binding protein 1, Y-box transcription factor	0.884454	-1.11116		P38117	ETFB	Electron transfer flavoprotein subunit beta, Beta-ETF	-2.0479	-1.65027
P27635	RPL10	60S ribosomal protein L10, Laminin receptor homolog, Large ribosomal subunit protein uL16, Protein QM, Ribosomal protein L10, Tumor suppressor QM	-0.449731	-0.797374		Q7Z4H7	HAUS6	HAUS augmin-like complex subunit 6	-0.571356	-3.79014
P30086	PEBP1	Phosphatidylethanolamine-binding protein 1, PEBP-1, HCNPpp, Neuropolypeptide h3, Prostatic-binding protein, Raf kinase inhibitor protein, RKIP	-0.432995	-1.30308		O75663	TIPRL	TIP41-like protein, Putative MAPK-activating protein PM10, Type 2A-interacting protein, TIP	-1.39951	-3.04119
Q9NW64	RBM22	Pre-mRNA-splicing factor RBM22, RNA-binding motif protein 22, Zinc finger CCCH domain-containing protein 16	0.814096	-2.18681		P50416	CPT1A	Carnitine O-palmitoyltransferase 1, liver isoform, CPT1-L, 2.3.1.21, Carnitine O-palmitoyltransferase I, liver isoform, CPT I, CPTI-L, Carnitine palmitoyltransferase 1A	-1.46876	-1.75364
Q9NY12	GAR1	H/ACA ribonucleoprotein complex subunit 1, Nucleolar protein family A member 1, snoRNP protein GAR1	0.697511	-2.28041		O15091	PRORP	Mitochondrial ribonuclease P catalytic subunit, 3.1.26.5, Mitochondrial ribonuclease P protein 3, Mitochondrial RNase P protein 3, Protein only RNase P catalytic subunit	-0.354816	-3.75929
Q9NZB2	FAM120A	Constitutive coactivator of PPAR-gamma-like protein 1, Oxidative stress-associated Src activator, Protein FAM120A	0.884745	-1.59639		Q9H3S7	PTPN23	Tyrosine-protein phosphatase non-receptor type 23, 3.1.3.48, His domain-containing protein tyrosine phosphatase, HD-PTP, Protein tyrosine phosphatase TD14, PTP-TD14	-0.930177	-3.34325
Q08170	SRSF4	Serine/arginine-rich splicing factor 4, Pre-mRNA-splicing factor SRP75, SRP001LB, Splicing factor, arginine/serine-rich 4	0.657964	-2.39919		Q5VYK3	ECPAS	Proteasome adapter and scaffold protein ECM29, Ecm29 proteasome adapter and scaffold, Proteasome-associated protein ECM29 homolog	-1.2932	-1.56443
Q6P5R6	RPL22L1	60S ribosomal protein L22-like 1, Large ribosomal subunit protein eL22-like 1	0.673411	-2.34118		Q9Y697	NFS1	Cysteine desulfurase, 2.8.1.7	-1.50868	-2.32312
Q8ND56	LSM14A	Protein LSM14 homolog A, Protein FAM61A, Protein SCD6 homolog, Putative alpha-synuclein-binding protein, AlphaSNBP, RNA-associated protein 55A, hRAP55, hRAP55A	0.765601	-2.54204		P42226	STAT6	Signal transducer and activator of transcription 6, IL-4 Stat	-1.23362	-2.73534
P61247	RPS3A	40S ribosomal protein S3a, Small ribosomal subunit protein eS1, v-fos transformation effector protein, Fte-1	-0.315676	-0.49409		O95573	ACSL3	Fatty acid CoA ligase Acsl3, Arachidonate--CoA ligase, 6.2.1.15, Long-chain acyl-CoA synthetase 3, LACS 3, Long-chain-fatty-acid--CoA ligase 3, 6.2.1.3, Medium-chain acyl-CoA ligase Acsl3, 6.2.1.2	-1.86566	-1.59564
O00541	PES1	Pescadillo homolog	-0.0795251	-1.31707		Q15031	LARS2	Leucine--tRNA ligase, mitochondrial, 6.1.1.4, Leucyl-tRNA synthetase, LeuRS	-1.43524	-2.43344
P42704	LRPPRC	Leucine-rich PPR motif-containing protein, mitochondrial, 130 kDa leucine-rich protein, LRP 130, GP130	0.821831	-0.794665		Q15437	SEC23B	Protein transport protein Sec23B, hSec23B, SEC23-related protein B	-1.97711	-2.13331
Q12849	GRSF1	G-rich sequence factor 1, GRSF-1	0.940326	-1.78814		O15230	LAMA5	Laminin subunit alpha-5, Laminin-10 subunit alpha, Laminin-11 subunit alpha, Laminin-15 subunit alpha	0.124636	-3.5183
Q13573	SNW1	SNW domain-containing protein 1, Nuclear protein SkiP, Nuclear receptor coactivator NCoA-62, Ski-interacting protein	-0.354368	-2.32721		P57678	GEMIN4	Gem-associated protein 4, Gemin-4, Component of gems 4, p97	-1.62971	-2.2556
Q9NX24	NHP2	H/ACA ribonucleoprotein complex subunit 2, Nucleolar protein family A member 2, snoRNP protein NHP2	0.24028	-2.15442		P46940	IQGAP1	Ras GTPase-activating-like protein IQGAP1, p195	-1.6449	-1.0252
Q76FK4	NOL8	Nucleolar protein 8, Nucleolar protein Nop132	0.399611	-2.63614		Q93008	USP9X	Probable ubiquitin carboxyl-terminal hydrolase FAF-X, 3.4.19.12, Deubiquitinating enzyme FAF-X, Fat facets in mammals, hFAM, Fat facets protein-related, X-linked, Ubiquitin thioesterase FAF-X, Ubiquitin-specific protease 9, X chromosome, Ubiquitin-specific-processing protease FAF-X	-1.35406	-2.18911
Q9NWH9	SLTM	SAFB-like transcription modulator, Modulator of estrogen-induced transcription	0.361736	-2.03213		O94979	SEC31A	Protein transport protein Sec31A, ABP125, ABP130, SEC31-like protein 1, SEC31-related protein A, Web1-like protein	-1.75719	-1.7378
Q9H8H0	NOL11	Nucleolar protein 11	0.175027	-2.01982		P11717	IGF2R	Cation-independent mannose-6-phosphate receptor, CI Man-6-P receptor, CI-MPR, M6PR, 300 kDa mannose 6-phosphate receptor, MPR 300, Insulin-like growth factor 2 receptor, Insulin-like growth factor II receptor, IGF-II receptor, M6P/IGF2 receptor, M6P/IGF2R, CD222	-0.958536	-2.43594
P22087	FBL	rRNA 2'-O-methyltransferase fibrillarin, 2.1.1.-, 34 kDa nucleolar scleroderma antigen, Histone-glutamine methyltransferase, U6 snRNA 2'-O-methyltransferase fibrillarin	0.355868	-1.2795		Q6UB35	MTHFD1L	Monofunctional C1-tetrahydrofolate synthase, mitochondrial, 6.3.4.3, Formyltetrahydrofolate synthetase	-1.57338	-2.00634
Q9NVN8	GNL3L	Guanine nucleotide-binding protein-like 3-like protein	1.07948	-2.2485		Q14C86	GAPVD1	GTPase-activating protein and VPS9 domain-containing protein 1, GAPex-5, Rab5-activating protein 6	-1.75468	-1.99182
P33240	CSTF2	Cleavage stimulation factor subunit 2, CF-1 64 kDa subunit, Cleavage stimulation factor 64 kDa subunit, CSTF 64 kDa subunit, CstF-64	1.00158	-2.25134		P00533	EGFR	Epidermal growth factor receptor, 2.7.10.1, Proto-oncogene c-ErbB-1, Receptor tyrosine-protein kinase erbB-1	-0.798329	-2.01767
Q9GZR7	DDX24	ATP-dependent RNA helicase DDX24, 3.6.4.13, DEAD box protein 24	0.354046	-1.96979		O15344	MID1	E3 ubiquitin-protein ligase Midline-1, 2.3.2.27, Midin, Putative transcription factor XPRF, RING finger protein 59, RING finger protein Midline-1, RING-type E3 ubiquitin transferase Midline-1, Tripartite motif-containing protein 18	-1.20885	-3.1729
Q6PKG0	LARP1	La-related protein 1, La ribonucleoprotein domain family member 1	0.557645	-1.60698		O95239	KIF4A	Chromosome-associated kinesin KIF4A, Chromokinesin-A	-1.23928	-2.63433
Q07020	RPL18	60S ribosomal protein L18, Large ribosomal subunit protein eL18	-0.828336	-0.886762		P82930	MRPS34	28S ribosomal protein S34, mitochondrial, MRP-S34, S34mt, Mitochondrial small ribosomal subunit protein mS34	-1.50087	-1.95071
Q9Y5J1	UTP18	U3 small nucleolar RNA-associated protein 18 homolog, WD repeat-containing protein 50	0.0812856	-1.8653		Q9NZJ4	SACS	Sacsin, DnaJ homolog subfamily C member 29, DNAJC29	-2.01642	-2.49549
Q9NVS2	MRPS18A	39S ribosomal protein S18a, mitochondrial, MRP-S18-a, Mrps18a, S18mt-a, 39S ribosomal protein S18-3, mitochondrial, MRP-S18-3, Mitochondrial large ribosomal subunit protein bS18a, Mitochondrial large ribosomal subunit protein mL66	0.928103	-2.22239		P31327	CPS1	Carbamoyl-phosphate synthase [ammonia], mitochondrial, 6.3.4.16, Carbamoyl-phosphate synthetase I, CPSase I	-1.31784	-0.590244
P48634	PRRC2A	Protein PRRC2A, HLA-B-associated transcript 2, Large proline-rich protein BAT2, Proline-rich and coiled-coil-containing protein 2A, Protein G2	0.850312	-2.03476		P40938	RFC3	Replication factor C subunit 3, Activator 1 38 kDa subunit, A1 38 kDa subunit, Activator 1 subunit 3, Replication factor C 38 kDa subunit, RF-C 38 kDa subunit, RFC38	-2.1676	-2.42499
P78332	RBM6	RNA-binding protein 6, Lung cancer antigen NY-LU-12, Protein G16, RNA-binding motif protein 6, RNA-binding protein DEF-3	1.03885	-2.57214		Q8TBB5	KLHDC4	Kelch domain-containing protein 4	-0.280217	-2.85243
O60869	EDF1	Endothelial differentiation-related factor 1, EDF-1, Multiprotein-bridging factor 1, MBF1	-0.216009	-1.39044		Q8WWK9	CKAP2	Cytoskeleton-associated protein 2, CTCL tumor antigen se20-10, Tumor- and microtubule-associated protein	-0.278716	-3.13607
Q86U42	PABPN1	Polyadenylate-binding protein 2, PABP-2, Poly(A)-binding protein 2, Nuclear poly(A)-binding protein 1, Poly(A)-binding protein II, PABII, Polyadenylate-binding nuclear protein 1	0.266575	-2.26449		O00116	AGPS	Alkyldihydroxyacetonephosphate synthase, peroxisomal, Alkyl-DHAP synthase, 2.5.1.26, Aging-associated gene 5 protein, Alkylglycerone-phosphate synthase	-2.65175	-2.11092
Q86W50	METTL16	RNA N6-adenosine-methyltransferase METTL16, Methyltransferase 10 domain-containing protein, Methyltransferase-like protein 16, N6-adenosine-methyltransferase METTL16, 2.1.1.348, U6 small nuclear RNA (adenine-(43)-N(6))-methyltransferase, 2.1.1.346	0.745594	-2.67482		P11498	PC	Pyruvate carboxylase, mitochondrial, 6.4.1.1, Pyruvic carboxylase, PCB	-1.9178	-1.81943
P41214	EIF2D	Eukaryotic translation initiation factor 2D, eIF2d, Hepatocellular carcinoma-associated antigen 56, Ligatin	0.542578	-2.78969		Q00653	NFKB2	Nuclear factor NF-kappa-B p100 subunit, DNA-binding factor KBF2, H2TF1, Lymphocyte translocation chromosome 10 protein, Nuclear factor of kappa light polypeptide gene enhancer in B-cells 2, Oncogene Lyt-10, Lyt10	-1.09858	-2.69152
Q03701	CEBPZ	CCAAT/enhancer-binding protein zeta, CCAAT-box-binding transcription factor, CBF, CCAAT-binding factor	0.42633	-1.91456		P16435	POR	NADPH--cytochrome P450 reductase, CPR, P450R, 1.6.2.4	-1.5148	-1.25729
Q9NZM5	NOP53	Ribosome biogenesis protein NOP53, Glioma tumor suppressor candidate region gene 2 protein, Protein interacting with carboxyl terminus 1, PICT-1, p60	0.186892	-2.1594		Q00325	SLC25A3	Phosphate carrier protein, mitochondrial, Phosphate transport protein, PTP, Solute carrier family 25 member 3	-2.16716	-1.0109
Q7Z2W4	ZC3HAV1	Zinc finger CCCH-type antiviral protein 1, ADP-ribosyltransferase diphtheria toxin-like 13, ARTD13, Inactive Poly [ADP-ribose] polymerase 13, PARP13, Zinc finger CCCH domain-containing protein 2, Zinc finger antiviral protein, ZAP	0.815811	-1.53752		P25391	LAMA1	Laminin subunit alpha-1, Laminin A chain, Laminin-1 subunit alpha, Laminin-3 subunit alpha, S-laminin subunit alpha, S-LAM alpha	-0.38078	-3.07034
P62308	SNRPG	Small nuclear ribonucleoprotein G, snRNP-G, Sm protein G, Sm-G, SmG	0.585592	-2.49136		Q9BPX3	NCAPG	Condensin complex subunit 3, Chromosome-associated protein G, Condensin subunit CAP-G, hCAP-G, Melanoma antigen NY-MEL-3, Non-SMC condensin I complex subunit G, XCAP-G homolog	-1.81943	-1.89048
P42766	RPL35	60S ribosomal protein L35, Large ribosomal subunit protein uL29	-0.968382	-1.02198		Q96AC1	FERMT2	Fermitin family homolog 2, Kindlin-2, Mitogen-inducible gene 2 protein, MIG-2, Pleckstrin homology domain-containing family C member 1, PH domain-containing family C member 1	-0.343325	-1.72453
P62266	RPS23	40S ribosomal protein S23, Small ribosomal subunit protein uS12	-0.587409	-1.16009		Q9H0H5	RACGAP1	Rac GTPase-activating protein 1, Male germ cell RacGap, MgcRacGAP, Protein CYK4 homolog, CYK4, HsCYK-4	-0.0524092	-2.47343
Q07065	CKAP4	Cytoskeleton-associated protein 4, 63-kDa cytoskeleton-linking membrane protein, Climp-63, p63	0.249421	-1.80125		Q9H9A6	LRRC40	Leucine-rich repeat-containing protein 40	-0.690407	-1.96031
O43251	RBFOX2	RNA binding protein fox-1 homolog 2, Fox-1 homolog B, Hexaribonucleotide-binding protein 2, RNA-binding motif protein 9, RNA-binding protein 9, Repressor of tamoxifen transcriptional activity	0.81035	-2.34616		P49915	GMPS	GMP synthase [glutamine-hydrolyzing], 6.3.5.2, GMP synthetase, Glutamine amidotransferase	-0.557576	-1.3874
Q12874	SF3A3	Splicing factor 3A subunit 3, SF3a60, Spliceosome-associated protein 61, SAP 61	0.0732042	-1.74835		Q8WUM4	PDCD6IP	Programmed cell death 6-interacting protein, PDCD6-interacting protein, ALG-2-interacting protein 1, ALG-2-interacting protein X, Hp95	-1.944	-1.43147
P52756	RBM5	RNA-binding protein 5, Protein G15, Putative tumor suppressor LUCA15, RNA-binding motif protein 5, Renal carcinoma antigen NY-REN-9	1.2155	-2.89429		P05556	ITGB1	Integrin beta-1, Fibronectin receptor subunit beta, Glycoprotein IIa, GPIIA, VLA-4 subunit beta, CD29	-0.928926	-1.46676
Q8N1G4	LRRC47	Leucine-rich repeat-containing protein 47	0.4044	-2.07536		Q15058	KIF14	Kinesin-like protein KIF14	-0.0422132	-3.04602
Q9NW13	RBM28	RNA-binding protein 28, RNA-binding motif protein 28	0.754313	-1.63076		O75165	DNAJC13	DnaJ homolog subfamily C member 13, Required for receptor-mediated endocytosis 8, RME-8	-1.83432	-2.95039
P78316	NOP14	Nucleolar protein 14, Nucleolar complex protein 14	0.327003	-2.09736		Q96FS4	SIPA1	Signal-induced proliferation-associated protein 1, Sipa-1, GTPase-activating protein Spa-1, p130 SPA-1	-1.50968	-3.00049
Q96PU8	QKI	KH domain-containing RNA-binding protein QKI, Protein quaking, Hqk, HqkI	0.720968	-3.21255		P50213	IDH3A	Isocitrate dehydrogenase [NAD] subunit alpha, mitochondrial, 1.1.1.41, Isocitric dehydrogenase subunit alpha, NAD(+)-specific ICDH subunit alpha	-1.6472	-1.98623
P55265	ADAR	Double-stranded RNA-specific adenosine deaminase, DRADA, 3.5.4.37, 136 kDa double-stranded RNA-binding protein, p136, Interferon-inducible protein 4, IFI-4, K88DSRBP	0.228179	-1.47793		O60488	ACSL4	Long-chain-fatty-acid--CoA ligase 4, 6.2.1.3, Arachidonate--CoA ligase, 6.2.1.15, Long-chain acyl-CoA synthetase 4, LACS 4	-1.88588	-1.85613
Q96GQ7	DDX27	Probable ATP-dependent RNA helicase DDX27, 3.6.4.13, DEAD box protein 27	0.414333	-1.61098		Q9BW27	NUP85	Nuclear pore complex protein Nup85, 85 kDa nucleoporin, FROUNT, Nucleoporin Nup75, Nucleoporin Nup85, Pericentrin-1	-1.54255	-2.22146
Q1KMD3	HNRNPUL2	Heterogeneous nuclear ribonucleoprotein U-like protein 2, Scaffold-attachment factor A2, SAF-A2	0.685736	-1.9465		P40939	HADHA	Trifunctional enzyme subunit alpha, mitochondrial, 78 kDa gastrin-binding protein, Monolysocardiolipin acyltransferase, 2.3.1.-, TP-alpha, Long-chain enoyl-CoA hydratase, 4.2.1.17, Long chain 3-hydroxyacyl-CoA dehydrogenase, 1.1.1.211	-1.72285	-1.55456
Q15269	PWP2	Periodic tryptophan protein 2 homolog	0.534758	-1.75117		Q02218	OGDH	2-oxoglutarate dehydrogenase complex component E1, E1o, OGDC-E1, OGDH-E1, 1.2.4.2, 2-oxoglutarate dehydrogenase, mitochondrial, Alpha-ketoglutarate dehydrogenase, Alpha-KGDH-E1, Thiamine diphosphate (ThDP)-dependent 2-oxoglutarate dehydrogenase	-1.3294	-1.98454
O43896	KIF1C	Kinesin-like protein KIF1C	0.968451	-2.92997		P23919	DTYMK	Thymidylate kinase, 2.7.4.9, dTMP kinase	-0.97686	-1.5642
Q9UNQ2	DIMT1	Probable dimethyladenosine transferase, 2.1.1.183, DIM1 dimethyladenosine transferase 1 homolog, DIM1 dimethyladenosine transferase 1-like, Probable 18S rRNA (adenine(1779)-N(6)/adenine(1780)-N(6))-dimethyltransferase, Probable 18S rRNA dimethylase, Probable S-adenosylmethionine-6-N',N'-adenosyl(rRNA) dimethyltransferase	-0.206284	-2.21887		P35520	CBS	Cystathionine beta-synthase, 4.2.1.22, Beta-thionase, Serine sulfhydrase	-1.98275	-1.97477
Q9BQ04	RBM4B	RNA-binding protein 4B, RNA-binding motif protein 30, RNA-binding motif protein 4B, RNA-binding protein 30	1.40335	-3.6319		O15143	ARPC1B	Actin-related protein 2/3 complex subunit 1B, Arp2/3 complex 41 kDa subunit, p41-ARC	-1.44133	-1.70303
O75691	UTP20	Small subunit processome component 20 homolog, Down-regulated in metastasis protein, Novel nucleolar protein 73, NNP73, Protein Key-1A6	0.345162	-1.59143		Q5JRX3	PITRM1	Presequence protease, mitochondrial, hPreP, 3.4.24.-, Pitrilysin metalloproteinase 1, Metalloprotease 1, hMP1	-1.76191	-2.62128
P46781	RPS9	40S ribosomal protein S9, Small ribosomal subunit protein uS4	-0.513871	-0.72841		P35606	COPB2	Coatomer subunit beta', Beta'-coat protein, Beta'-COP, p102	-1.2539	-1.49448
Q9BY77	POLDIP3	Polymerase delta-interacting protein 3, 46 kDa DNA polymerase delta interaction protein, p46, S6K1 Aly/REF-like target, SKAR	0.0398436	-1.86611		Q9HD67	MYO10	Unconventional myosin-X, Unconventional myosin-10	-1.06277	-3.71827
Q96T58	SPEN	Msx2-interacting protein, SMART/HDAC1-associated repressor protein, SPEN homolog	1.18712	-2.06087		Q02241	KIF23	Kinesin-like protein KIF23, Kinesin-like protein 5, Mitotic kinesin-like protein 1	-0.0978253	-2.47359
O95478	NSA2	Ribosome biogenesis protein NSA2 homolog, Hairy cell leukemia protein 1, TGF-beta-inducible nuclear protein 1	0.378433	-1.99457		Q15021	NCAPD2	Condensin complex subunit 1, Chromosome condensation-related SMC-associated protein 1, Chromosome-associated protein D2, hCAP-D2, Non-SMC condensin I complex subunit D2, XCAP-D2 homolog	-1.46135	-1.68088
Q9Y3Y2	CHTOP	Chromatin target of PRMT1 protein, Friend of PRMT1 protein, Small arginine- and glycine-rich protein, SRAG	0.426861	-2.08625		Q9NU22	MDN1	Midasin, Dynein-related AAA-ATPase MDN1, MIDAS-containing protein	-0.212443	-2.83948
P62899	RPL31	60S ribosomal protein L31, Large ribosomal subunit protein eL31	-0.0629905	-0.817754		O75962	TRIO	Triple functional domain protein, 2.7.11.1, PTPRF-interacting protein	-0.651686	-3.40354
O00425	IGF2BP3	Insulin-like growth factor 2 mRNA-binding protein 3, IGF2 mRNA-binding protein 3, IMP-3, IGF-II mRNA-binding protein 3, KH domain-containing protein overexpressed in cancer, hKOC, VICKZ family member 3	0.674081	-1.69388		O00159	MYO1C	Unconventional myosin-Ic, Myosin I beta, MMI-beta, MMIb	-2.10453	-1.65094
P46087	NOP2	Probable 28S rRNA (cytosine(4447)-C(5))-methyltransferase, 2.1.1.-, Nucleolar protein 1, Nucleolar protein 2 homolog, Proliferating-cell nucleolar antigen p120, Proliferation-associated nucleolar protein p120	-0.0259998	-1.24419		Q15392	DHCR24	Delta(24)-sterol reductase, 1.3.1.72, 24-dehydrocholesterol reductase, 3-beta-hydroxysterol Delta-24-reductase, Diminuto/dwarf1 homolog, Seladin-1	-0.390853	-2.07545
Q96EY7	PTCD3	Pentatricopeptide repeat domain-containing protein 3, mitochondrial, 28S ribosomal protein S39, mitochondrial, MRP-S39, Mitochondrial small ribosomal subunit protein mS39, Transformation-related gene 15 protein, TRG-15	0.554711	-1.6172		P25205	MCM3	DNA replication licensing factor MCM3, 3.6.4.12, DNA polymerase alpha holoenzyme-associated protein P1, P1-MCM3, RLF subunit beta, p102	-1.5847	-1.44871
Q969S3	ZNF622	Cytoplasmic 60S subunit biogenesis factor ZNF622, Zinc finger protein 622, Zinc finger-like protein 9	0.314372	-2.19964		Q13619	CUL4A	Cullin-4A, CUL-4A	-1.98072	-1.57695
Q8IWR0	ZC3H7A	Zinc finger CCCH domain-containing protein 7A	1.44747	-3.01086		Q6KC79	NIPBL	Nipped-B-like protein, Delangin, SCC2 homolog	-0.622214	-2.65199
Q9H7B2	RPF2	Ribosome production factor 2 homolog, Brix domain-containing protein 1, Ribosome biogenesis protein RPF2 homolog	0.185916	-1.73334		Q13045	FLII	Protein flightless-1 homolog	-1.61943	-1.83951
Q9H000	MKRN2	E3 ubiquitin-protein ligase makorin-2, 2.3.2.27, RING finger protein 62, RING-type E3 ubiquitin transferase makorin-2	0.501817	-3.2836		P28331	NDUFS1	NADH-ubiquinone oxidoreductase 75 kDa subunit, mitochondrial, 7.1.1.2, Complex I-75kD, CI-75kD	-1.87465	-2.29647
P79522	PRR3	Proline-rich protein 3, MHC class I region proline-rich protein CAT56	1.84173	-3.94923		Q14160	SCRIB	Protein scribble homolog, Scribble, hScrib, Protein LAP4	-0.654079	-2.87948
Q96MU7	YTHDC1	YTH domain-containing protein 1, Splicing factor YT521, YT521-B	0.290304	-2.15657		Q9NTI5	PDS5B	Sister chromatid cohesion protein PDS5 homolog B, Androgen-induced proliferation inhibitor, Androgen-induced prostate proliferative shutoff-associated protein AS3	-1.22283	-2.50822
P63244	RACK1	Receptor of activated protein C kinase 1, Cell proliferation-inducing gene 21 protein, Guanine nucleotide-binding protein subunit beta-2-like 1, Guanine nucleotide-binding protein subunit beta-like protein 12.3, Human lung cancer oncogene 7 protein, HLC-7, Receptor for activated C kinase, Small ribosomal subunit protein RACK1	-0.626988	-0.762486		P29401	TKT	Transketolase, TK, 2.2.1.1	-1.94982	-0.375225
Q8N3Z6	ZCCHC7	Zinc finger CCHC domain-containing protein 7, TRAMP-like complex RNA-binding factor ZCCHC7	0.964756	-3.55887		P52789	HK2	Hexokinase-2, 2.7.1.1, Hexokinase type II, HK II, Hexokinase-B, Muscle form hexokinase	-1.82835	-1.65533
Q9Y4Z0	LSM4	U6 snRNA-associated Sm-like protein LSm4, Glycine-rich protein, GRP	-0.102072	-2.40858		Q9Y490	TLN1	Talin-1	-1.04869	-1.47192
Q8IWZ3	ANKHD1	Ankyrin repeat and KH domain-containing protein 1, HIV-1 Vpr-binding ankyrin repeat protein, Multiple ankyrin repeats single KH domain, hMASK	0.483137	-2.60815		P57740	NUP107	Nuclear pore complex protein Nup107, 107 kDa nucleoporin, Nucleoporin Nup107	-1.09116	-1.97341
P61254	RPL26	60S ribosomal protein L26, Large ribosomal subunit protein uL24	-0.104143	-0.729943		P49189	ALDH9A1	4-trimethylaminobutyraldehyde dehydrogenase, TMABA-DH, TMABALDH, 1.2.1.47, Aldehyde dehydrogenase E3 isozyme, Aldehyde dehydrogenase family 9 member A1, 1.2.1.3, Gamma-aminobutyraldehyde dehydrogenase, 1.2.1.19, R-aminobutyraldehyde dehydrogenase	-2.0265	-1.8794
Q99590	SCAF11	Protein SCAF11, CTD-associated SR protein 11, Renal carcinoma antigen NY-REN-40, SC35-interacting protein 1, SR-related and CTD-associated factor 11, SRSF2-interacting protein, Serine/arginine-rich splicing factor 2-interacting protein, Splicing factor, arginine/serine-rich 2-interacting protein, Splicing regulatory protein 129, SRrp129	0.482605	-2.54002		O95347	SMC2	Structural maintenance of chromosomes protein 2, SMC protein 2, SMC-2, Chromosome-associated protein E, hCAP-E, XCAP-E homolog	-1.37591	-1.56626
Q96P11	NSUN5	28S rRNA (cytosine-C(5))-methyltransferase, 2.1.1.-, NOL1-related protein, NOL1R, NOL1/NOP2/Sun domain family member 5, Williams-Beuren syndrome chromosomal region 20A protein	0.845428	-2.32056		P42224	STAT1	Signal transducer and activator of transcription 1-alpha/beta, Transcription factor ISGF-3 components p91/p84	-1.60231	-2.27123
Q96AG4	LRRC59	Leucine-rich repeat-containing protein 59, Ribosome-binding protein p34, p34	-0.323017	-1.562		Q13085	ACACA	Acetyl-CoA carboxylase 1, ACC1, 6.4.1.2, Acetyl-Coenzyme A carboxylase alpha, ACC-alpha	-1.64092	-2.19857
O43159	RRP8	Ribosomal RNA-processing protein 8, 2.1.1.-, Cerebral protein 1, Nucleomethylin	0.523818	-2.21828		P30084	ECHS1	Enoyl-CoA hydratase, mitochondrial, mECH, mECH1, 4.2.1.17, 5.3.3.8, Enoyl-CoA hydratase 1, ECHS1, Short-chain enoyl-CoA hydratase, SCEH	-0.802266	-1.74921
O75821	EIF3G	Eukaryotic translation initiation factor 3 subunit G, eIF3g, Eukaryotic translation initiation factor 3 RNA-binding subunit, eIF-3 RNA-binding subunit, Eukaryotic translation initiation factor 3 subunit 4, eIF-3-delta, eIF3 p42, eIF3 p44	-0.0248558	-1.50983		Q9NQW6	ANLN	Anillin	-0.965378	-2.45599
P98175	RBM10	RNA-binding protein 10, G patch domain-containing protein 9, RNA-binding motif protein 10, RNA-binding protein S1-1, S1-1	0.804448	-2.11429		P11172	UMPS	Uridine 5'-monophosphate synthase, UMP synthase, Orotate phosphoribosyltransferase, OPRT, OPRTase, 2.4.2.10, Orotidine 5'-phosphate decarboxylase, ODC, OMPD, 4.1.1.23, OMPdecase	-1.45814	-1.94122
Q8NE71	ABCF1	ATP-binding cassette sub-family F member 1, ATP-binding cassette 50, TNF-alpha-stimulated ABC protein	0.291698	-1.51511		Q9H3U1	UNC45A	Protein unc-45 homolog A, Unc-45A, GCUNC-45, Smooth muscle cell-associated protein 1, SMAP-1	-1.5311	-2.16058
P20290	BTF3	Transcription factor BTF3, Nascent polypeptide-associated complex subunit beta, NAC-beta, RNA polymerase B transcription factor 3	-0.519216	-1.19715		P41250	GARS1	Glycine--tRNA ligase, 6.1.1.14, Diadenosine tetraphosphate synthetase, Ap4A synthetase, 2.7.7.-, Glycyl-tRNA synthetase, GlyRS, Glycyl-tRNA synthetase 1	-1.73703	-1.34537
Q9NRA8	EIF4ENIF1	Eukaryotic translation initiation factor 4E transporter, 4E-T, eIF4E transporter, Eukaryotic translation initiation factor 4E nuclear import factor 1	0.888123	-3.78643		Q96TA1	NIBAN2	Protein Niban 2, Meg-3, Melanoma invasion by ERK, MINERVA, Niban-like protein 1, Protein FAM129B	-1.73694	-1.8035
Q15050	RRS1	Ribosome biogenesis regulatory protein homolog	0.452459	-1.74202		Q06210	GFPT1	Glutamine--fructose-6-phosphate aminotransferase [isomerizing] 1, 2.6.1.16, D-fructose-6-phosphate amidotransferase 1, Glutamine:fructose-6-phosphate amidotransferase 1, GFAT 1, GFAT1, Hexosephosphate aminotransferase 1	-1.78358	-1.65522
Q15637	SF1	Splicing factor 1, Mammalian branch point-binding protein, BBP, mBBP, Transcription factor ZFM1, Zinc finger gene in MEN1 locus, Zinc finger protein 162	0.468719	-1.86364		P07195	LDHB	L-lactate dehydrogenase B chain, LDH-B, 1.1.1.27, LDH heart subunit, LDH-H, Renal carcinoma antigen NY-REN-46	-2.12228	-0.206174
Q8NCA5	FAM98A	Protein FAM98A	0.798903	-2.52924		A0AVT1	UBA6	Ubiquitin-like modifier-activating enzyme 6, Ubiquitin-activating enzyme 6, 6.2.1.45, Monocyte protein 4, MOP-4, Ubiquitin-activating enzyme E1-like protein 2, E1-L2	-1.2103	-2.47884
Q5T653	MRPL2	39S ribosomal protein L2, mitochondrial, L2mt, MRP-L2, Mitochondrial large ribosomal subunit protein uL2m	0.804403	-2.48416		Q9NR09	BIRC6	Baculoviral IAP repeat-containing protein 6, 2.3.2.27, BIR repeat-containing ubiquitin-conjugating enzyme, BRUCE, RING-type E3 ubiquitin transferase BIRC6, Ubiquitin-conjugating BIR domain enzyme apollon, APOLLON	-0.196069	-3.13384
O60306	AQR	RNA helicase aquarius, 3.6.4.13, Intron-binding protein of 160 kDa, IBP160	0.579076	-2.10288		P11413	G6PD	Glucose-6-phosphate 1-dehydrogenase, G6PD, 1.1.1.49	-1.98135	-1.2635
Q9BYK8	HELZ2	Helicase with zinc finger domain 2, ATP-dependent helicase PRIC285, Helicase with zinc finger 2, transcriptional coactivator, PPAR-alpha-interacting complex protein 285, PPAR-gamma DNA-binding domain-interacting protein 1, PDIP1, PPAR-gamma DBD-interacting protein 1, Peroxisomal proliferator-activated receptor A-interacting complex 285 kDa protein, 3.6.4.-	0.931044	-2.94434		Q9NUQ3	TXLNG	Gamma-taxilin, Environmental lipopolysaccharide-responding gene protein, Factor inhibiting ATF4-mediated transcription, FIAT, Lipopolysaccharide-specific response protein 5	-0.659808	-2.33789
O75153	CLUH	Clustered mitochondria protein homolog	-0.0178538	-1.37103		P06576	ATP5F1B	ATP synthase subunit beta, mitochondrial, 7.1.2.2, ATP synthase F1 subunit beta	-1.55485	-0.851009
Q9H2U1	DHX36	ATP-dependent DNA/RNA helicase DHX36, 3.6.4.12, 3.6.4.13, DEAD/H box polypeptide 36, DEAH-box protein 36, G4-resolvase-1, G4R1, MLE-like protein 1, RNA helicase associated with AU-rich element protein	0.368584	-2.2001		Q66K14	TBC1D9B	TBC1 domain family member 9B	-1.34842	-3.44878
Q9H8H2	DDX31	Probable ATP-dependent RNA helicase DDX31, 3.6.4.13, DEAD box protein 31, Helicain	0.18098	-2.20827		P55060	CSE1L	Exportin-2, Exp2, Cellular apoptosis susceptibility protein, Chromosome segregation 1-like protein, Importin-alpha re-exporter	-1.99969	-1.16569
[truncated: 508 more rows]

## Sheet: Figure 4D
Figure 4D
Complete list of candidate RBPs with estimated UV-crosslinking efficiencies included as part of Supplementary Table 2. GO-annotations were exported from PANTHER V17.0 (Thomas et al., 2003) and made available in Supplemental Table S5.
[truncated: 774 more rows]

## Sheet: Figure 5A
Figure 5A
[truncated: 34 more rows]

## Sheet: Figure 5B
Figure 5B
[truncated: 30 more rows]

## Sheet: Figure 5C
Figure 5C
[truncated: 25 more rows]

## Sheet: Figure 6A
Figure 6A
[truncated: 794 more rows]

[truncated: 23 more sheets: Figure 6B, Figure 6C, Figure 7A, Figure 7B, Figure 8A, Figure 9A, Figure 10A, Figure 11A, Figure 12A, Figure 13A, Figure 14A, Figure S2A, Figure S2B, Figure S2C, Figure S2D, Figure S2E, Figure S2F, Figure S2G, Figure S2H, Figure S3A …]
