# Supplementary material
Source: HighWire-hosted journal article supplement (doi:10.1101/rna.079848.123)
Supplement: Supplemental_Table_S1.xlsx [file Supplemental_Table_S1.xlsx]

## Sheet: Supplemental Table S1
Supplemental Table S1
List of candidate RBPs with estimated UV-crosslinking efficiencies listed on the left.
Complete MS datasets from SILAC LC-MS/MS analysis of clRNP fractions and LC-MS/MS analysis of input and clRNP fractions list on the right [Kristofich and Nicchita, 2023]; see referenced study for additional information on sample prep, SILAC or non-SILAC LC-MS/MS analysis, and data processing.
Estimated S/N ratios for candidate RBPs (i.e., those displaying significant UV-enrichment) which do not contain at least 2 unique peptide matches were not used for estimation of protein-specific UV-crosslinking efficiencies.
Assigned UniProt IDs used in this study are listed next to the UniProt IDs used in [Kristofich and Nicchitta, 2023]. For additional information, see Supplemental Table S2.										Protein yield (µg protein/% fraction), Input sample			Protein yield (µg protein/% fraction), RNP fraction			Protein UV-crosslinking efficiency (%)											SILAC LC-MS/MS analysis of clRNP fractions isolated from pooled cellular samples containing equivalent amounts of UV-crosslinked (0.4 J/cm2, 254 nm) and non-crosslinked HeLa cells ([Kristofich and Nicchitta, 2023]; Supplementary Data 2, 3).								LC-MS/MS analysis of input samples isolated from DMSO-treated, UV-crosslinked (0.4 J/cm2, 254 nm) HeLa cells ([Kristofich and Nicchitta, 2023]; Supplementary Data 8).									LC-MS/MS analysis of clRNP fractions isolated from DMSO-treated, UV-crosslinked (0.4 J/cm2, 254 nm) HeLa cells ([Kristofich and Nicchitta, 2023]; Supplementary Data 9).
Equations used to calculate values not reported previously were provided above each column, remove " to activate formula and copy/paste into cells underneath column headers [Kristofich and Nicchitta, 2023].										Replicate 1	Replicate 2	Replicate 3	Replicate 1	Replicate 2	Replicate 3	Replicate 1	Replicate 2	Replicate 3
Log10 normalization of protein UV-crosslinking efficiencies and abundances was performed using the average %CL and %TP values of three independent replicates respectively.										36.936	39.24	36.648	0.484219	0.501211	0.473555	1.312	1.277	1.292
				"=IFERROR(VLOOKUP($B9,$AC:$AG,5,FALSE),"")	"=IFERROR((VLOOKUP($B9,$AT:$AZ,5,FALSE)/SUM(AX:AX))*100,"")	"=IFERROR((VLOOKUP($B9,$AT:$AZ,6,FALSE)/SUM(AY:AY))*100,"")	"=IFERROR((VLOOKUP($B9,$AT:$AZ,7,FALSE)/SUM(AZ:AZ))*100,"")	"=IFERROR((2^$E9)/((2^$E9)+1)*F9,"")	"=IFERROR((2^$E9)/((2^$E9)+1)*G9,"")	"=IFERROR((2^$E9)/((2^$E9)+1)*H9,"")	"=IFERROR((VLOOKUP($B9,$AK:$AQ,5,FALSE)/SUM(AO:AO))*100,"")	"=IFERROR((VLOOKUP($B9,$AK:$AQ,6,FALSE)/SUM(AP:AP))*100,"")	"=IFERROR((VLOOKUP($B9,$AK:$AQ,7,FALSE)/SUM(AQ:AQ))*100,"")	"=IFERROR(($Q$7/100)*I9,"")	"=IFERROR(($R$7/100)*J9,"")	"=IFERROR(($S$7/100)*K9,"")	"=IFERROR((O9/L9)*100,"")	"=IFERROR((P9/M9)*100,"")	"=IFERROR((Q9/N9)*100,"")	"=IFERROR(AVERAGE(R9:T9),"")	"=IFERROR(STDEV(R9:T9),"")	"=IFERROR(LOG(U9,10),"")
Primary UniProt ID [Kristofich and Nicchitta, 2023]	Assigned UniProt ID	Primary gene name	Protein name	Log2(S/N)	(%TP)clRNP, R1	(%TP)clRNP, R2	(%TP)clRNP, R3	(%TPS)clRNP, R1	(%TPS)clRNP, R2	(%TPS)clRNP, R3	(%TP)input, R1	(%TP)input, R2	(%TP)input, R3	(%TPS)input, R1	(%TPS)input, R2	(%TPS)input, R3	%CL, R1	%CL, R2	%CL, R3	Average %CL	%CL SD	Log10(average %CL)					Primary UniProt ID [Kristofich and Nicchitta, 2023]	Assigned UniProt ID	Primary gene name	Protein name	# of unique peptides	Log2(S/N)	Candidate RBP?		Primary UniProt ID [Kristofich and Nicchitta, 2023]	Assigned UniProt ID	Primary gene name	Protein name	# of unique peptides	SPI, R1	SPI, R2	SPI, R3		Primary UniProt ID [Kristofich and Nicchitta, 2023]	Assigned UniProt ID	Primary gene name	Protein name	# of unique peptides	SPI, R1
P79522	P79522	PRR3	Proline-rich protein 3, MHC class I region proline-rich protein CAT56	4.94528	0.00340506	0.0039693	0.00315405	0.00329801	0.00384452	0.00305489	0.000146013	3.18872e-05	0.000159316	4.32699e-05	4.90945e-05	3.94692e-05	29.6343	153.963	24.7741	69.4572	73.2246	1.84172					P78527	P78527	PRKDC	DNA-dependent protein kinase catalytic subunit, DNA-PK catalytic subunit, DNA-PKcs, 2.7.11.1, DNPK1, p460	161	0.738248	Yes		Q15149	Q15149	PLEC	Plectin, PCN, PLTN, Hemidesmosomal protein 1, HD1, Plectin-1	284	1.92208e+10	1.02003e+10	1.53209e+10		P52272	P52272	HNRNPM	Heterogeneous nuclear ribonucleoprotein M, hnRNP M	229	3.18152e+11
Q92879	Q92879	CELF1	CUGBP Elav-like family member 1, CELF-1, 50 kDa nuclear polyadenylated RNA-binding protein, Bruno-like protein 2, CUG triplet repeat RNA-binding protein 1, CUG-BP1, CUG-BP- and ETR-3-like factor 1, Deadenylation factor CUG-BP, Embryo deadenylation element-binding protein homolog, EDEN-BP homolog, RNA-binding protein BRUNOL-2	4.00461	0.997355	0.925098	0.828085	0.938864	0.870844	0.779521	0.016146	0.0249592	0.0217754	0.0123179	0.0111207	0.0100714	76.2906	44.5553	46.2512	55.699	17.8529	1.74585					P42704	P42704	LRPPRC	Leucine-rich PPR motif-containing protein, mitochondrial, 130 kDa leucine-rich protein, LRP 130, GP130	137	2.79263	Yes		P78527	P78527	PRKDC	DNA-dependent protein kinase catalytic subunit, DNA-PK catalytic subunit, DNA-PKcs, 2.7.11.1, DNPK1, p460	242	3.6991e+10	3.4205e+10	2.43088e+10		P78527	P78527	PRKDC	DNA-dependent protein kinase catalytic subunit, DNA-PK catalytic subunit, DNA-PKcs, 2.7.11.1, DNPK1, p460	188	9.31284e+09
Q15717	Q15717	ELAVL1	ELAV-like protein 1, Hu-antigen R, HuR	4.80957	2.83847	2.9783	2.53352	2.74074	2.87575	2.44629	0.0653585	0.0895142	0.0759331	0.0359585	0.0367234	0.0316061	55.0173	41.0252	41.6236	45.8887	7.91126	1.66171					Q6P2Q9	Q6P2Q9	PRPF8	Pre-mRNA-processing-splicing factor 8, 220 kDa U5 snRNP-specific protein, PRP8 homolog, Splicing factor Prp8, p220	123	3.72364	Yes		P15924	P15924	DSP	Desmoplakin, DP, 250/210 kDa paraneoplastic pemphigus antigen	175	9.90473e+09	7.72529e+09	7.94354e+09		Q15149	Q15149	PLEC	Plectin, PCN, PLTN, Hemidesmosomal protein 1, HD1, Plectin-1	185	5.8616e+09
A0AV96	A0AV96	RBM47	RNA-binding protein 47, RNA-binding motif protein 47	5.39206	0.138387	0.132866	0.122059	0.135168	0.129776	0.11922	0.00473408	0.00408233	0.00294	0.00177341	0.00165724	0.00154032	37.4604	40.5953	52.3916	43.4824	7.87319	1.63831					P52272	P52272	HNRNPM	Heterogeneous nuclear ribonucleoprotein M, hnRNP M	113	4.41112	Yes		P35579	P35579	MYH9	Myosin, heavy polypeptide 9, non-muscle, isoform CRA_a	162	3.26197e+10	2.43507e+10	2.73378e+10		P42704	P42704	LRPPRC	Leucine-rich PPR motif-containing protein, mitochondrial, 130 kDa leucine-rich protein, LRP 130, GP130	159	5.75135e+10
Q15032	Q15032	R3HDM1	R3H domain-containing protein 1	3.94661	0.00772118	0.00838411	0.0087088	0.00725092	0.00787346	0.00817838	0.000344435	0.00027857	0.000250222	9.5132e-05	0.000100544	0.000105665	27.6197	36.093	42.2284	35.3137	7.33544	1.54794					Q15149	Q15149	PLEC	Plectin, PCN, PLTN, Hemidesmosomal protein 1, HD1, Plectin-1	110	1.05354	Yes		Q14204	Q14204	DYNC1H1	Cytoplasmic dynein 1 heavy chain 1, Cytoplasmic dynein heavy chain 1, Dynein heavy chain, cytosolic	160	6.28741e+09	4.66638e+09	5.60208e+09		P46013	P46013	MKI67	Proliferation marker protein Ki-67, Antigen identified by monoclonal antibody Ki-67, Antigen KI-67, Antigen Ki67	143	5.67551e+09
Q92945	Q92945	KHSRP	Far upstream element-binding protein 2, FUSE-binding protein 2, KH type-splicing regulatory protein, KSRP, p75	3.61481	1.92993	1.9798	2.03934	1.78428	1.83039	1.88544	0.0571036	0.0700302	0.0807533	0.0234098	0.0233741	0.0243599	40.9953	33.3772	30.1658	34.8461	5.56214	1.54215					P49327	A0A0U1RQF0	FASN	Fatty acid synthase, 1.1.1.100, 1.3.1.39, 2.3.1.38, 2.3.1.39, 2.3.1.41, 2.3.1.85, 3.1.2.14, 4.2.1.59	99	-1.31786	Yes		P52272	P52272	HNRNPM	Heterogeneous nuclear ribonucleoprotein M, hnRNP M	155	1.96409e+10	2.0592e+10	2.12424e+10		Q6P2Q9	Q6P2Q9	PRPF8	Pre-mRNA-processing-splicing factor 8, 220 kDa U5 snRNP-specific protein, PRP8 homolog, Splicing factor Prp8, p220	137	1.27956e+10
Q15434	Q15434	RBMS2	RNA-binding motif, single-stranded-interacting protein 2, Suppressor of CDC2 with RNA-binding motif 3	6.34918	0.00956739	0.00968604	0.00718114	0.00945146	0.00956867	0.00709413	0.000417634	0.000213365	0.000558375	0.000124003	0.000122192	9.16561e-05	29.6918	57.2689	16.4148	34.4585	20.84	1.5373					Q96T58	Q96T58	SPEN	Msx2-interacting protein, SMART/HDAC1-associated repressor protein, SPEN homolog	93	3.09341	Yes		P21333	P21333	FLNA	Filamin-A, FLN-A, Actin-binding protein 280, ABP-280, Alpha-filamin, Endothelial actin-binding protein, Filamin-1, Non-muscle filamin	147	1.97552e+10	1.58327e+10	1.55155e+10		Q96T58	Q96T58	SPEN	Msx2-interacting protein, SMART/HDAC1-associated repressor protein, SPEN homolog	135	6.20869e+09
Q13148	Q13148	TARDBP	TAR DNA-binding protein 43, TDP-43	5.48921	1.0016	0.988441	0.923894	0.979788	0.966914	0.903774	0.0306878	0.041284	0.0397801	0.0128548	0.0123475	0.0116768	41.889	29.9087	29.3532	33.717	7.08263	1.52785					P31327	P31327	CPS1	Carbamoyl-phosphate synthase [ammonia], mitochondrial, 6.3.4.16, Carbamoyl-phosphate synthetase I, CPSase I	93	0.0185355	Yes		Q09666	Q09666	AHNAK	Neuroblast differentiation-associated protein AHNAK, Desmoyokin	147	7.30566e+09	4.73745e+09	4.2971e+09		P15924	P15924	DSP	Desmoplakin, DP, 250/210 kDa paraneoplastic pemphigus antigen	128	3.75587e+09
Q8IWR0	Q8IWR0	ZC3H7A	Zinc finger CCCH domain-containing protein 7A	3.70133	0.02371	0.0217076	0.0204236	0.0220174	0.0201579	0.0189657	0.000912687	0.00123841	0.000774912	0.000288868	0.000257416	0.000245036	31.6503	20.786	31.6212	28.0191	6.26411	1.44745					Q08211	Q08211	DHX9	ATP-dependent RNA helicase A, 3.6.4.13, DEAH box protein 9, DExH-box helicase 9, Leukophysin, LKP, Nuclear DNA helicase II, NDH II, RNA helicase A	89	3.97618	Yes		A0A0U1RQF0	A0A0U1RQF0	FASN	Fatty acid synthase, 1.1.1.100, 1.3.1.39, 2.3.1.38, 2.3.1.39, 2.3.1.41, 2.3.1.85, 3.1.2.14, 4.2.1.59	128	2.33515e+10	1.56622e+10	2.02765e+10		P19338	P19338	NCL	Nucleolin, Protein C23	126	4.05288e+11
Q96I24	Q96I24	FUBP3	Far upstream element-binding protein 3, FUSE-binding protein 3	4.7096	0.800992	0.810438	0.863612	0.771506	0.780605	0.831822	0.0292484	0.0510006	0.0402478	0.0101222	0.00996833	0.0107471	34.6076	19.5455	26.7024	26.9518	7.53413	1.43059					P46013	P46013	MKI67	Proliferation marker protein Ki-67, Antigen identified by monoclonal antibody Ki-67, Antigen KI-67, Antigen Ki67	86	2.40484	Yes		P46013	P46013	MKI67	Proliferation marker protein Ki-67, Antigen identified by monoclonal antibody Ki-67, Antigen KI-67, Antigen Ki67	126	3.54217e+09	2.93981e+09	2.85464e+09		Q08211	Q08211	DHX9	ATP-dependent RNA helicase A, 3.6.4.13, DEAH box protein 9, DExH-box helicase 9, Leukophysin, LKP, Nuclear DNA helicase II, NDH II, RNA helicase A	120	4.02076e+10
Q01085	Q01085	TIAL1	Nucleolysin TIAR, TIA-1-related protein	5.14304	0.306039	0.323704	0.282116	0.297617	0.314795	0.274352	0.0127623	0.0188642	0.0138232	0.00390473	0.00401993	0.00354462	30.5957	21.3098	25.6426	25.8494	4.64641	1.41245					Q14152	Q14152	EIF3A	Eukaryotic translation initiation factor 3 subunit A, eIF3a, Eukaryotic translation initiation factor 3 subunit 10, eIF-3-theta, eIF3 p167, eIF3 p180, eIF3 p185	81	3.361	Yes		Q6P2Q9	Q6P2Q9	PRPF8	Pre-mRNA-processing-splicing factor 8, 220 kDa U5 snRNP-specific protein, PRP8 homolog, Splicing factor Prp8, p220	125	5.31475e+09	4.9357e+09	5.34376e+09		Q14152	Q14152	EIF3A	Eukaryotic translation initiation factor 3 subunit A, eIF3a, Eukaryotic translation initiation factor 3 subunit 10, eIF-3-theta, eIF3 p167, eIF3 p180, eIF3 p185	118	2.02297e+10
Q9BQ04	Q9BQ04	RBM4B	RNA-binding protein 4B, RNA-binding motif protein 30, RNA-binding motif protein 4B, RNA-binding protein 30	5.32776	0.00314026	0.00312947	0.00313167	0.00306397	0.00305344	0.00305559	8.11235e-05	0.00036993	0.000249179	4.01993e-05	3.89924e-05	3.94782e-05	49.5532	10.5405	15.8433	25.3123	21.16	1.40333					Q14690	Q14690	PDCD11	Protein RRP5 homolog, NF-kappa-B-binding protein, NFBP, Programmed cell death protein 11	80	3.76231	Yes		P42704	P42704	LRPPRC	Leucine-rich PPR motif-containing protein, mitochondrial, 130 kDa leucine-rich protein, LRP 130, GP130	118	1.00137e+10	8.25346e+09	9.85492e+09		P23246	P23246	SFPQ	Splicing factor, proline- and glutamine-rich, 100 kDa DNA-pairing protein, hPOMp100, DNA-binding p52/p100 complex, 100 kDa subunit, Polypyrimidine tract-binding protein-associated-splicing factor, PSF, PTB-associated-splicing factor	114	1.06227e+11
Q8TB72	Q8TB72	PUM2	Pumilio homolog 2, Pumilio-2	2.93441	0.0278049	0.0276744	0.0293131	0.0245884	0.024473	0.0259221	0.00133581	0.0010513	0.00177885	0.0003226	0.00031252	0.000334914	24.1501	29.7271	18.8276	24.2349	5.45028	1.38444					P15924	P15924	DSP	Desmoplakin, DP, 250/210 kDa paraneoplastic pemphigus antigen	78	-0.703939	Yes		P13639	P13639	EEF2	Elongation factor 2, EF-2	115	6.07552e+10	5.21071e+10	5.6919e+10		O75534	O75534	CSDE1	Cold shock domain-containing protein E1, N-ras upstream gene protein, Protein UNR	108	6.62128e+10
Q8NDT2	Q8NDT2	RBM15B	Putative RNA-binding protein 15B, One-twenty two protein 3, HsOTT3, HuOTT3, RNA-binding motif protein 15B	4.86025	0.0233945	0.0218991	0.0232118	0.0226159	0.0211703	0.0224392	0.00110258	0.00143695	0.00117756	0.000296721	0.000270345	0.000289915	26.9115	18.8137	24.6199	23.4484	4.17408	1.37011					P23246	P23246	SFPQ	Splicing factor, proline- and glutamine-rich, 100 kDa DNA-pairing protein, hPOMp100, DNA-binding p52/p100 complex, 100 kDa subunit, Polypyrimidine tract-binding protein-associated-splicing factor, PSF, PTB-associated-splicing factor	73	4.72891	Yes		Q14152	Q14152	EIF3A	Eukaryotic translation initiation factor 3 subunit A, eIF3a, Eukaryotic translation initiation factor 3 subunit 10, eIF-3-theta, eIF3 p167, eIF3 p180, eIF3 p185	114	8.04183e+09	6.57188e+09	7.7033e+09		Q00839	Q00839	HNRNPU	Heterogeneous nuclear ribonucleoprotein U, hnRNP U, GRIP120, Nuclear p120 ribonucleoprotein, Scaffold-attachment factor A, SAF-A, p120, pp120	104	1.09335e+11
P31483	P31483	TIA1	Cytotoxic granule associated RNA binding protein TIA1, Nucleolysin TIA-1 isoform p40, RNA-binding protein TIA-1, T-cell-restricted intracellular antigen-1, TIA-1, p40-TIA-1	4.58157	0.0756777	0.0752637	0.080852	0.0726437	0.0722463	0.0776106	0.00363102	0.00553347	0.00475362	0.000953086	0.000922586	0.00100273	26.2484	16.6728	21.094	21.3384	4.79249	1.32916					Q92945	Q92945	KHSRP	Far upstream element-binding protein 2, FUSE-binding protein 2, KH type-splicing regulatory protein, KSRP, p75	72	3.61481	Yes		P31327	P31327	CPS1	Carbamoyl-phosphate synthase [ammonia], mitochondrial, 6.3.4.16, Carbamoyl-phosphate synthetase I, CPSase I	110	1.81133e+10	1.20197e+10	1.48936e+10		Q09666	Q09666	AHNAK	Neuroblast differentiation-associated protein AHNAK, Desmoyokin	99	2.60052e+09
Q9UKM9	Q9UKM9	RALY	RNA-binding protein Raly, Autoantigen p542, Heterogeneous nuclear ribonucleoprotein C-like 2, hnRNP core protein C-like 2, hnRNP associated with lethal yellow protein homolog	4.89993	0.923957	0.921309	0.763173	0.894012	0.891451	0.738439	0.0485112	0.0647868	0.0486609	0.0117294	0.0113838	0.00954064	24.1788	17.5712	19.6064	20.4521	3.38404	1.31074					O75691	O75691	UTP20	Small subunit processome component 20 homolog, Down-regulated in metastasis protein, Novel nucleolar protein 73, NNP73, Protein Key-1A6	70	3.4588	Yes		P07814	P07814	EPRS1	Bifunctional glutamate/proline--tRNA ligase, Bifunctional aminoacyl-tRNA synthetase, Cell proliferation-inducing gene 32 protein, Glutamatyl-prolyl-tRNA synthetase, Glutamate--tRNA ligase, 6.1.1.17, Glutamyl-tRNA synthetase, GluRS, Proline--tRNA ligase, 6.1.1.15, Prolyl-tRNA synthetase	108	7.39775e+09	5.45082e+09	6.47363e+09		Q9NR30	Q9NR30	DDX21	Nucleolar RNA helicase 2, 3.6.4.13, DEAD box protein 21, Gu-alpha, Nucleolar RNA helicase Gu, Nucleolar RNA helicase II, RH II/Gu	97	3.00337e+10
Q14671	Q14671	PUM1	Pumilio homolog 1, HsPUM, Pumilio-1	3.67685	0.136808	0.136552	0.152361	0.126887	0.126649	0.141311	0.00854424	0.00809184	0.00872479	0.00166475	0.00161731	0.00182574	19.4839	19.9869	20.9259	20.1322	0.731901	1.30389					P19338	P19338	NCL	Nucleolin, Protein C23	69	5.36848	Yes		Q13813	Q13813	SPTAN1	Spectrin alpha chain, non-erythrocytic 1, Alpha-II spectrin, Fodrin alpha chain, Spectrin, non-erythroid alpha subunit	104	4.17834e+09	1.74996e+09	3.41053e+09		Q7KZF4	Q7KZF4	SND1	Staphylococcal nuclease domain-containing protein 1, 3.1.31.1, 100 kDa coactivator, EBNA2 coactivator p100, Tudor domain-containing protein 11, p100 co-activator	96	3.60729e+10
P52272	P52272	HNRNPM	Heterogeneous nuclear ribonucleoprotein M, hnRNP M	4.41112	5.44557	5.95167	5.3177	5.20111	5.68449	5.07898	0.336196	0.352472	0.363605	0.0682386	0.0725909	0.0656204	20.2972	20.5948	18.0472	19.6464	1.39295	1.29328					Q9BQG0	Q9BQG0	MYBBP1A	Myb-binding protein 1A	68	4.08355	Yes		Q08211	Q08211	DHX9	ATP-dependent RNA helicase A, 3.6.4.13, DEAH box protein 9, DExH-box helicase 9, Leukophysin, LKP, Nuclear DNA helicase II, NDH II, RNA helicase A	103	9.83747e+09	1.07941e+10	1.02563e+10		Q9BQG0	Q9BQG0	MYBBP1A	Myb-binding protein 1A	93	7.51496e+09
P15880	P15880	RPS2	40S ribosomal protein S2, 40S ribosomal protein S4, Protein LLRep3, Small ribosomal subunit protein uS5	5.36865	4.58317	4.04821	4.5032	4.47486	3.95255	4.39679	0.264894	0.362335	0.326047	0.0587102	0.0504741	0.0568065	22.1636	13.9302	17.4228	17.8389	4.13245	1.25137					O75534	O75534	CSDE1	Cold shock domain-containing protein E1, N-ras upstream gene protein, Protein UNR	66	4.72716	Yes		Q92616	Q92616	GCN1	eIF-2-alpha kinase activator GCN1, GCN1 eIF-2-alpha kinase activator homolog, GCN1-like protein 1, General control of amino-acid synthesis 1-like protein 1, Translational activator GCN1, HsGCN1	100	4.14012e+09	3.24513e+09	3.68235e+09		Q15233	Q15233	NONO	Non-POU domain-containing octamer-binding protein, NonO protein, 54 kDa nuclear RNA- and DNA-binding protein, p54(nrb), p54nrb, 55 kDa nuclear protein, NMT55, DNA-binding p52/p100 complex, 52 kDa subunit	92	9.10312e+10
O95758	O95758	PTBP3	Polypyrimidine tract-binding protein 3, Regulator of differentiation 1, Rod1	4.24229	0.0603225	0.0552199	0.0568049	0.0572951	0.0524486	0.0539541	0.00407642	0.0036091	0.00451398	0.000751712	0.000669768	0.000697087	18.4405	18.5578	15.4428	17.4804	1.76552	1.24255					Q7KZF4	Q7KZF4	SND1	Staphylococcal nuclease domain-containing protein 1, 3.1.31.1, 100 kDa coactivator, EBNA2 coactivator p100, Tudor domain-containing protein 11, p100 co-activator	66	4.08695	Yes		P08670	P08670	VIM	Vimentin	96	1.00783e+11	1.02547e+11	9.30499e+10		Q00341	Q00341	HDLBP	Vigilin, High density lipoprotein-binding protein, HDL-binding protein	91	9.24697e+09
Q8IXT5	Q8IXT5	RBM12B	RNA-binding protein 12B, RNA-binding motif protein 12B	4.42822	0.0224157	0.0216005	0.0206238	0.0214208	0.0206417	0.0197084	0.00212111	0.00132423	0.00135423	0.00028104	0.000263595	0.000254633	13.2497	19.9056	18.8027	17.3193	3.56731	1.23853					Q09666	Q09666	AHNAK	Neuroblast differentiation-associated protein AHNAK, Desmoyokin	66	2.45689	Yes		P19338	P19338	NCL	Nucleolin, Protein C23	95	5.50758e+10	1.0435e+11	7.29897e+10		Q14690	Q14690	PDCD11	Protein RRP5 homolog, NF-kappa-B-binding protein, NFBP, Programmed cell death protein 11	90	8.62375e+09
P52756	P52756	RBM5	RNA-binding protein 5, Protein G15, Putative tumor suppressor LUCA15, RNA-binding motif protein 5, Renal carcinoma antigen NY-REN-9	4.17821	0.0163832	0.0180088	0.0160566	0.0155256	0.0170661	0.0152161	0.00141487	0.0010884	0.00132363	0.000203696	0.000217934	0.000196592	14.3968	20.0234	14.8524	16.4242	3.12531	1.21548					Q7L2E3	Q7L2E3	DHX30	ATP-dependent RNA helicase DHX30, 3.6.4.13, DEAH box protein 30	66	1.76289	Yes		O75369	O75369	FLNB	Filamin-B, FLN-B, ABP-278, ABP-280 homolog, Actin-binding-like protein, Beta-filamin, Filamin homolog 1, Fh1, Filamin-3, Thyroid autoantigen, Truncated actin-binding protein, Truncated ABP	91	3.81558e+10	8.27333e+10	1.06076e+11		P43243	P43243	MATR3	Matrin-3	87	3.20876e+10
Q96T58	Q96T58	SPEN	Msx2-interacting protein, SMART/HDAC1-associated repressor protein, SPEN homolog	3.09341	0.10627	0.105401	0.131403	0.0951244	0.0943473	0.117622	0.00898709	0.00911093	0.00797948	0.00124803	0.00120482	0.00151967	13.8869	13.2238	19.0447	15.3852	3.18657	1.1871					Q00839	Q00839	HNRNPU	Heterogeneous nuclear ribonucleoprotein U, hnRNP U, GRIP120, Nuclear p120 ribonucleoprotein, Scaffold-attachment factor A, SAF-A, p120, pp120	63	4.48869	Yes		Q7KZF4	Q7KZF4	SND1	Staphylococcal nuclease domain-containing protein 1, 3.1.31.1, 100 kDa coactivator, EBNA2 coactivator p100, Tudor domain-containing protein 11, p100 co-activator	88	7.5415e+09	6.23119e+09	7.38624e+09		Q92945	Q92945	KHSRP	Far upstream element-binding protein 2, FUSE-binding protein 2, KH type-splicing regulatory protein, KSRP, p75	86	1.12754e+11
Q96T37	Q96T37	RBM15	RNA-binding protein 15, One-twenty two protein 1, RNA-binding motif protein 15	1.98141	0.0942433	0.0961742	0.0968246	0.0751995	0.0767403	0.0772593	0.00688923	0.00694991	0.00581905	0.000986618	0.000979973	0.00099819	14.3212	14.1005	17.1538	15.1918	1.70273	1.18161					P11940	P11940	PABPC1	Polyadenylate-binding protein 1, PABP-1, Poly(A)-binding protein 1	63	3.94498	Yes		Q9NR30	Q9NR30	DDX21	Nucleolar RNA helicase 2, 3.6.4.13, DEAD box protein 21, Gu-alpha, Nucleolar RNA helicase Gu, Nucleolar RNA helicase II, RH II/Gu	88	1.00175e+10	1.05947e+10	1.02754e+10		P13639	P13639	EEF2	Elongation factor 2, EF-2	86	1.04421e+10
O60506	O60506	SYNCRIP	Heterogeneous nuclear ribonucleoprotein Q, hnRNP Q, Glycine- and tyrosine-rich RNA-binding protein, GRY-RBP, NS1-associated protein 1, Synaptotagmin-binding, cytoplasmic RNA-interacting protein	4.27317	1.632	1.65876	1.59131	1.55175	1.57719	1.51306	0.111161	0.164754	0.136575	0.020359	0.0201407	0.0195487	18.3149	12.2247	14.3135	14.951	3.09472	1.17467					Q00341	Q00341	HDLBP	Vigilin, High density lipoprotein-binding protein, HDL-binding protein	60	3.5343	Yes		Q9BQG0	Q9BQG0	MYBBP1A	Myb-binding protein 1A	88	4.27336e+09	4.97166e+09	4.00541e+09		O00571	O00571	DDX3X	ATP-dependent RNA helicase DDX3X, 3.6.4.13, CAP-Rf, DEAD box protein 3, X-chromosomal, DEAD box, X isoform, DBX, Helicase-like protein 2, HLP2	85	2.27685e+10
P52597	P52597	HNRNPF	Heterogeneous nuclear ribonucleoprotein F, hnRNP F, Nucleolin-like protein mcs94-1	4.84274	1.10337	1.07423	0.993573	1.06622	1.03805	0.960114	0.0755815	0.107491	0.0888291	0.0139887	0.0132559	0.0124047	18.5081	12.3321	13.9646	14.935	3.20033	1.1742					Q9NZB2	Q9NZB2	FAM120A	Constitutive coactivator of PPAR-gamma-like protein 1, Oxidative stress-associated Src activator, Protein FAM120A	60	3.35508	Yes		P02545	P02545	LMNA	Prelamin-A/C	84	1.8489e+10	1.46696e+10	1.61624e+10		Q9Y4C8	Q9Y4C8	RBM19	Probable RNA-binding protein 19, RNA-binding motif protein 19	83	8.89636e+09
Q93062	Q93062	RBPMS	RNA-binding protein with multiple splicing, RBP-MS, Heart and RRM expressed sequence, Hermes	3.93017	0.000457125	0.000673029	0.000492969	0.000428984	0.000631597	0.000462621	3.32126e-05	8.07541e-05	3.58572e-05	5.62827e-06	8.06549e-06	5.97706e-06	16.9462	9.98772	16.6691	14.5343	3.93992	1.1624					Q9HCE1	Q9HCE1	MOV10	Helicase MOV-10, 3.6.4.13, Armitage homolog, Moloney leukemia virus 10 protein	57	5.05126	Yes		Q00341	Q00341	HDLBP	Vigilin, High density lipoprotein-binding protein, HDL-binding protein	83	3.53212e+09	2.78179e+09	3.37576e+09		Q9Y520	Q9Y520	PRRC2C	Protein PRRC2C, BAT2 domain-containing protein 1, HBV X-transactivated gene 2 protein, HBV XAg-transactivated protein 2, HLA-B-associated transcript 2-like 2, Proline-rich and coiled-coil-containing protein 2C	82	5.52631e+09
O75534	O75534	CSDE1	Cold shock domain-containing protein E1, N-ras upstream gene protein, Protein UNR	4.72716	1.13331	1.12788	1.15472	1.09208	1.08685	1.11271	0.0952982	0.120106	0.0933185	0.0143281	0.013879	0.0143762	15.035	11.5556	15.4056	13.9987	2.12389	1.14609					P43243	P43243	MATR3	Matrin-3	57	3.92492	Yes		Q00839	Q00839	HNRNPU	Heterogeneous nuclear ribonucleoprotein U, hnRNP U, GRIP120, Nuclear p120 ribonucleoprotein, Scaffold-attachment factor A, SAF-A, p120, pp120	82	2.12432e+10	2.40326e+10	2.07802e+10		Q9HCE1	Q9HCE1	MOV10	Helicase MOV-10, 3.6.4.13, Armitage homolog, Moloney leukemia virus 10 protein	79	8.30801e+09
P31942	P31942	HNRNPH3	Heterogeneous nuclear ribonucleoprotein H3, hnRNP H3, Heterogeneous nuclear ribonucleoprotein 2H9, hnRNP 2H9	4.89664	0.375739	0.361056	0.433901	0.363535	0.349328	0.419807	0.0305035	0.0402597	0.0402431	0.00476958	0.00446092	0.00542391	15.6362	11.0804	13.4779	13.3981	2.27895	1.12704					Q9NR30	Q9NR30	DDX21	Nucleolar RNA helicase 2, 3.6.4.13, DEAD box protein 21, Gu-alpha, Nucleolar RNA helicase Gu, Nucleolar RNA helicase II, RH II/Gu	56	4.19877	Yes		O75534	O75534	CSDE1	Cold shock domain-containing protein E1, N-ras upstream gene protein, Protein UNR	80	5.56742e+09	7.01681e+09	5.45183e+09		P36578	P36578	RPL4	60S ribosomal protein L4, 60S ribosomal protein L1, Large ribosomal subunit protein uL4	79	5.7133e+10
P62917	P62917	RPL8	60S ribosomal protein L8, Large ribosomal subunit protein uL2	5.06075	3.65602	3.55098	3.46839	3.54966	3.44768	3.36749	0.251309	0.448308	0.377443	0.0465716	0.0440269	0.043508	18.5316	9.82067	11.527	13.2931	4.6162	1.12363					Q15233	Q15233	NONO	Non-POU domain-containing octamer-binding protein, NonO protein, 54 kDa nuclear RNA- and DNA-binding protein, p54(nrb), p54nrb, 55 kDa nuclear protein, NMT55, DNA-binding p52/p100 complex, 52 kDa subunit	55	4.12998	Yes		Q01082	Q01082	SPTBN1	Spectrin beta chain, non-erythrocytic 1, Beta-II spectrin, Fodrin beta chain, Spectrin, non-erythroid beta chain 1	80	4.22306e+09	2.187e+09	3.24066e+09		Q9NW13	Q9NW13	RBM28	RNA-binding protein 28, RNA-binding motif protein 28	75	6.74178e+09
Q15233	Q15233	NONO	Non-POU domain-containing octamer-binding protein, NonO protein, 54 kDa nuclear RNA- and DNA-binding protein, p54(nrb), p54nrb, 55 kDa nuclear protein, NMT55, DNA-binding p52/p100 complex, 52 kDa subunit	4.12998	1.55811	1.47522	1.36567	1.47393	1.39551	1.29189	0.131874	0.131077	0.148003	0.0193379	0.0178207	0.0166912	14.6639	13.5957	11.2776	13.1791	1.73115	1.11988					P14866	P14866	HNRNPL	Heterogeneous nuclear ribonucleoprotein L, hnRNP L	55	4.09637	Yes		O75643	O75643	SNRNP200	U5 small nuclear ribonucleoprotein 200 kDa helicase, 3.6.4.13, Activating signal cointegrator 1 complex subunit 3-like 1, BRR2 homolog, U5 snRNP-specific 200 kDa protein, U5-200KD	77	4.72325e+09	3.91813e+09	4.22946e+09		Q96I24	Q96I24	FUBP3	Far upstream element-binding protein 3, FUSE-binding protein 3	72	4.67972e+10
Q9H6T0	Q9H6T0	ESRP2	Epithelial splicing regulatory protein 2, RNA-binding motif protein 35B, RNA-binding protein 35B	2.17824	0.032236	0.0312547	0.0288916	0.0264025	0.0255988	0.0236633	0.00233113	0.00266596	0.0025896	0.000346401	0.000326897	0.00030573	14.8598	12.2619	11.8061	12.9759	1.64732	1.11314					Q92900	Q92900	UPF1	Regulator of nonsense transcripts 1, 3.6.4.12, 3.6.4.13, ATP-dependent helicase RENT1, Nonsense mRNA reducing factor 1, NORF1, Up-frameshift suppressor 1 homolog, hUpf1	54	3.97849	Yes		Q00610	Q00610	CLTC	Clathrin heavy chain 1, Clathrin heavy chain on chromosome 17, CLH-17	77	1.45931e+10	1.11414e+10	1.29884e+10		Q7L2E3	Q7L2E3	DHX30	ATP-dependent RNA helicase DHX30, 3.6.4.13, DEAH box protein 30	72	6.62002e+09
P31943	P31943	HNRNPH1	Heterogeneous nuclear ribonucleoprotein H, hnRNP H	4.59917	1.41054	1.42534	1.42653	1.35465	1.36886	1.37	0.127782	0.160994	0.127719	0.017773	0.0174804	0.0177004	13.9089	10.8578	13.8589	12.8752	1.74732	1.10975					O00571	O00571	DDX3X	ATP-dependent RNA helicase DDX3X, 3.6.4.13, CAP-Rf, DEAD box protein 3, X-chromosomal, DEAD box, X isoform, DBX, Helicase-like protein 2, HLP2	54	3.93033	Yes		P23246	P23246	SFPQ	Splicing factor, proline- and glutamine-rich, 100 kDa DNA-pairing protein, hPOMp100, DNA-binding p52/p100 complex, 100 kDa subunit, Polypyrimidine tract-binding protein-associated-splicing factor, PSF, PTB-associated-splicing factor	75	1.11816e+10	1.09476e+10	1.10694e+10		A0A0U1RQF0	A0A0U1RQF0	FASN	Fatty acid synthase, 1.1.1.100, 1.3.1.39, 2.3.1.38, 2.3.1.39, 2.3.1.41, 2.3.1.85, 3.1.2.14, 4.2.1.59	72	2.21209e+09
Q9Y6M1	Q9Y6M1	IGF2BP2	Insulin-like growth factor 2 mRNA-binding protein 2, IGF2 mRNA-binding protein 2, IMP-2, Hepatocellular carcinoma autoantigen p62, IGF-II mRNA-binding protein 2, VICKZ family member 2	2.87974	0.00220105	0.00270332	0.00232589	0.00193777	0.00237997	0.00204768	0.000325467	0.000239804	0.000145859	2.54236e-05	3.03922e-05	2.64561e-05	7.81141	12.6737	18.1382	12.8744	5.16629	1.10973					P13639	P13639	EEF2	Elongation factor 2, EF-2	53	1.65071	Yes		P46940	P46940	IQGAP1	Ras GTPase-activating-like protein IQGAP1, p195	74	6.30776e+09	5.07373e+09	5.15776e+09		P46777	P46777	RPL5	60S ribosomal protein L5, Large ribosomal subunit protein uL18	69	1.66572e+11
P55795	P55795	HNRNPH2	Heterogeneous nuclear ribonucleoprotein H2, hnRNP H2, FTP-3, Heterogeneous nuclear ribonucleoprotein H', hnRNP H'	4.41438	0.143628	0.135414	0.132267	0.137195	0.129348	0.126342	0.0119851	0.0161082	0.0128078	0.00179999	0.00165177	0.00163234	15.0185	10.2542	12.7449	12.6726	2.38298	1.10286					Q12906	Q12906	ILF3	Interleukin enhancer-binding factor 3, Double-stranded RNA-binding protein 76, DRBP76, M-phase phosphoprotein 4, MPP4, Nuclear factor associated with dsRNA, NFAR, Nuclear factor of activated T-cells 90 kDa, NF-AT-90, Translational control protein 80, TCP80	52	2.50851	Yes		Q15233	Q15233	NONO	Non-POU domain-containing octamer-binding protein, NonO protein, 54 kDa nuclear RNA- and DNA-binding protein, p54(nrb), p54nrb, 55 kDa nuclear protein, NMT55, DNA-binding p52/p100 complex, 52 kDa subunit	74	7.70424e+09	7.6577e+09	8.64657e+09		Q8TDD1	Q8TDD1	DDX54	ATP-dependent RNA helicase DDX54, 3.6.4.13, ATP-dependent RNA helicase DP97, DEAD box RNA helicase 97 kDa, DEAD box protein 54	69	7.26031e+09
O14730	O14730	RIOK3	Serine/threonine-protein kinase RIO3, 2.7.11.1, RIO kinase 3, sudD homolog	3.06936	0.000650194	0.000841877	0.00077079	0.00058098	0.000752259	0.000688739	0.000114195	3.91857e-05	0.000138575	7.62246e-06	9.60634e-06	8.89851e-06	6.67496	24.5149	6.42145	12.5371	10.3739	1.0982					Q96I24	Q96I24	FUBP3	Far upstream element-binding protein 3, FUSE-binding protein 3	51	4.7096	Yes		P08238	P08238	HSP90AB1	Heat shock protein HSP 90-beta, HSP 90, Heat shock 84 kDa, HSP 84, HSP84	74	1.25751e+11	1.02398e+11	1.01846e+11		Q14692	Q14692	BMS1	Ribosome biogenesis protein BMS1 homolog, Ribosome assembly protein BMS1 homolog	68	6.7844e+09
P14866	P14866	HNRNPL	Heterogeneous nuclear ribonucleoprotein L, hnRNP L	4.09637	1.35591	1.27331	1.30925	1.28102	1.20298	1.23694	0.121282	0.146103	0.12386	0.016807	0.0153621	0.0159812	13.8578	10.5146	12.9027	12.425	1.72204	1.0943					Q9Y4C8	Q9Y4C8	RBM19	Probable RNA-binding protein 19, RNA-binding motif protein 19	51	4.32762	Yes		P14618	P14618	PKM	Pyruvate kinase PKM, 2.7.1.40, Cytosolic thyroid hormone-binding protein, CTHBP, Opa-interacting protein 3, OIP-3, Pyruvate kinase 2/3, Pyruvate kinase muscle isozyme, Threonine-protein kinase PKM2, 2.7.11.1, Thyroid hormone-binding protein 1, THBP1, Tumor M2-PK, Tyrosine-protein kinase PKM2, 2.7.10.2, p58	72	5.04134e+10	4.74914e+10	4.71629e+10		Q9NZB2	Q9NZB2	FAM120A	Constitutive coactivator of PPAR-gamma-like protein 1, Oxidative stress-associated Src activator, Protein FAM120A	66	9.95862e+09
Q9NVN8	Q9NVN8	GNL3L	Guanine nucleotide-binding protein-like 3-like protein	3.70521	0.0580757	0.0565939	0.0524033	0.0539402	0.0525639	0.0486717	0.00509204	0.00550324	0.00633401	0.000707695	0.000671241	0.000628838	13.8981	12.1972	9.92796	12.0077	1.99182	1.07946					Q9Y520	Q9Y520	PRRC2C	Protein PRRC2C, BAT2 domain-containing protein 1, HBV X-transactivated gene 2 protein, HBV XAg-transactivated protein 2, HLA-B-associated transcript 2-like 2, Proline-rich and coiled-coil-containing protein 2C	51	3.83562	Yes		P38646	P38646	HSPA9	Stress-70 protein, mitochondrial, 75 kDa glucose-regulated protein, GRP-75, Heat shock 70 kDa protein 9, Mortalin, MOT, Peptide-binding protein 74, PBP74	72	2.20596e+10	1.73703e+10	2.18197e+10		Q7Z2W4	Q7Z2W4	ZC3HAV1	Zinc finger CCCH-type antiviral protein 1, ADP-ribosyltransferase diphtheria toxin-like 13, ARTD13, Inactive Poly [ADP-ribose] polymerase 13, PARP13, Zinc finger CCCH domain-containing protein 2, Zinc finger antiviral protein, ZAP	66	9.27867e+09
Q96PK6	Q96PK6	RBM14	RNA-binding protein 14, Paraspeckle protein 2, PSP2, RNA-binding motif protein 14, RRM-containing coactivator activator/modulator, Synaptotagmin-interacting protein, SYT-interacting protein	4.64739	0.337825	0.348549	0.359014	0.324863	0.335175	0.345238	0.0382943	0.0384958	0.0332683	0.0042622	0.00428019	0.00446048	11.1301	11.1186	13.4076	11.8854	1.31825	1.07501					P17844	P17844	DDX5	Probable ATP-dependent RNA helicase DDX5, 3.6.4.13, DEAD box protein 5, RNA helicase p68	50	3.61851	Yes		P34932	P34932	HSPA4	Heat shock 70 kDa protein 4, HSP70RY, Heat shock 70-related protein APG-2	72	8.80028e+09	6.64335e+09	6.06462e+09		Q92900	Q92900	UPF1	Regulator of nonsense transcripts 1, 3.6.4.12, 3.6.4.13, ATP-dependent helicase RENT1, Nonsense mRNA reducing factor 1, NORF1, Up-frameshift suppressor 1 homolog, hUpf1	66	8.64145e+09
Q8WXF1	Q8WXF1	PSPC1	Paraspeckle component 1, Paraspeckle protein 1	4.58285	0.0711915	0.0710489	0.0713371	0.0683398	0.0682029	0.0684796	0.00797578	0.00715593	0.00728537	0.000896618	0.000870951	0.000884757	11.2418	12.171	12.1443	11.8524	0.528966	1.0738					Q5JTH9	Q5JTH9	RRP12	RRP12-like protein	50	2.40232	Yes		Q14690	Q14690	PDCD11	Protein RRP5 homolog, NF-kappa-B-binding protein, NFBP, Programmed cell death protein 11	71	2.06654e+09	2.24642e+09	2.19494e+09		O60506	O60506	SYNCRIP	Heterogeneous nuclear ribonucleoprotein Q, hnRNP Q, Glycine- and tyrosine-rich RNA-binding protein, GRY-RBP, NS1-associated protein 1, Synaptotagmin-binding, cytoplasmic RNA-interacting protein	64	9.53483e+10
P23246	P23246	SFPQ	Splicing factor, proline- and glutamine-rich, 100 kDa DNA-pairing protein, hPOMp100, DNA-binding p52/p100 complex, 100 kDa subunit, Polypyrimidine tract-binding protein-associated-splicing factor, PSF, PTB-associated-splicing factor	4.72891	1.81821	1.74173	1.72627	1.75214	1.67844	1.66354	0.191397	0.18739	0.189475	0.022988	0.0214336	0.021493	12.0107	11.438	11.3434	11.5974	0.361039	1.06436					P26599	P26599	PTBP1	Polypyrimidine tract-binding protein 1, PTB, 57 kDa RNA-binding protein PPTB-1, Heterogeneous nuclear ribonucleoprotein I, hnRNP I	48	4.20342	Yes		P06733	P06733	ENO1	Alpha-enolase, 4.2.1.11, 2-phospho-D-glycerate hydro-lyase, C-myc promoter-binding protein, Enolase 1, MBP-1, MPB-1, Non-neural enolase, NNE, Phosphopyruvate hydratase, Plasminogen-binding protein	71	5.75117e+10	4.50863e+10	5.72373e+10		Q99613	Q99613	EIF3C	Eukaryotic translation initiation factor 3 subunit C, eIF3c, Eukaryotic translation initiation factor 3 subunit 8, eIF3 p110	64	7.79023e+09
P26599	P26599	PTBP1	Polypyrimidine tract-binding protein 1, PTB, 57 kDa RNA-binding protein PPTB-1, Heterogeneous nuclear ribonucleoprotein I, hnRNP I	4.20342	2.18104	2.1449	1.89559	2.06875	2.03447	1.798	0.165439	0.289035	0.24884	0.027142	0.0259801	0.0232301	16.406	8.98859	9.33535	11.5766	4.18593	1.06358					P61978	P61978	HNRNPK	Heterogeneous nuclear ribonucleoprotein K, hnRNP K, Transformation up-regulated nuclear protein, TUNP	47	5.34661	Yes		P36578	P36578	RPL4	60S ribosomal protein L4, 60S ribosomal protein L1, Large ribosomal subunit protein uL4	70	1.85952e+10	2.36914e+10	2.07964e+10		P17844	P17844	DDX5	Probable ATP-dependent RNA helicase DDX5, 3.6.4.13, DEAD box protein 5, RNA helicase p68	63	3.86683e+10
Q8IY67	Q8IY67	RAVER1	Ribonucleoprotein PTB-binding 1, Protein raver-1	4.41639	0.0310151	0.0267993	0.0295901	0.0296276	0.0256004	0.0282663	0.00338794	0.00305004	0.00311844	0.000388715	0.000326917	0.000365201	11.4735	10.7184	11.711	11.301	0.518282	1.05312					P22626	P22626	HNRNPA2B1	Heterogeneous nuclear ribonucleoproteins A2/B1, hnRNP A2/B1	47	4.65584	Yes		P53396	P53396	ACLY	ATP-citrate synthase, 2.3.3.8, ATP-citrate (pro-S-)-lyase, ACL, Citrate cleavage enzyme	69	8.49416e+09	7.73984e+09	8.46066e+09		Q08J23	Q08J23	NSUN2	RNA cytosine C(5)-methyltransferase NSUN2, 2.1.1.-, Myc-induced SUN domain-containing protein, Misu, NOL1/NOP2/Sun domain family member 2, Substrate of AIM1/Aurora kinase B, mRNA cytosine C(5)-methyltransferase, tRNA cytosine C(5)-methyltransferase, 2.1.1.203, tRNA methyltransferase 4 homolog, hTrm4	63	4.83636e+09
Q9BRL6	Q9BRL6	SRSF8	Serine/arginine-rich splicing factor 8, Pre-mRNA-splicing factor SRP46, Splicing factor SRp46, Splicing factor, arginine/serine-rich 2B	3.01329	0.00286827	0.00305281	0.00301231	0.00255218	0.00271638	0.00268034	0.000266108	0.000256124	0.000486149	3.34846e-05	3.46881e-05	3.463e-05	12.5831	13.5435	7.12332	11.0833	3.4629	1.04467					Q8TDD1	Q8TDD1	DDX54	ATP-dependent RNA helicase DDX54, 3.6.4.13, ATP-dependent RNA helicase DP97, DEAD box RNA helicase 97 kDa, DEAD box protein 54	47	4.32082	Yes		P43243	P43243	MATR3	Matrin-3	69	6.71435e+09	6.3122e+09	6.657e+09		P23588	P23588	EIF4B	Eukaryotic translation initiation factor 4B, eIF-4B	62	1.49309e+10
P78332	P78332	RBM6	RNA-binding protein 6, Lung cancer antigen NY-LU-12, Protein G16, RNA-binding motif protein 6, RNA-binding protein DEF-3	4.09817	0.0226051	0.0229729	0.0253389	0.0213581	0.0217055	0.023941	0.00298284	0.00269805	0.00235434	0.000280218	0.000277179	0.000309318	9.39434	10.2733	13.1382	10.9353	1.95776	1.03883					Q7Z2W4	Q7Z2W4	ZC3HAV1	Zinc finger CCCH-type antiviral protein 1, ADP-ribosyltransferase diphtheria toxin-like 13, ARTD13, Inactive Poly [ADP-ribose] polymerase 13, PARP13, Zinc finger CCCH domain-containing protein 2, Zinc finger antiviral protein, ZAP	47	3.1889	Yes		P53621	P53621	COPA	Coatomer subunit alpha, Alpha-coat protein, Alpha-COP, HEP-COP, HEPCOP	68	4.1959e+09	3.85921e+09	3.89842e+09		P27816	P27816	MAP4	Microtubule-associated protein 4, MAP-4	62	1.03902e+10
Q9NR56	Q9NR56	MBNL1	Muscleblind-like protein 1, Triplet-expansion RNA-binding protein	1.04748	0.0963124	0.0923239	0.0854747	0.0649088	0.0622208	0.0576048	0.0079766	0.00656924	0.00808161	0.000851603	0.000794559	0.000744254	10.6763	12.0951	9.20923	10.6602	1.44302	1.02777					O43390	O43390	HNRNPR	Heterogeneous nuclear ribonucleoprotein R, hnRNP R	44	4.88509	Yes		Q9NZM1	Q9NZM1	MYOF	Myoferlin, Fer-1-like protein 3	68	2.59689e+09	2.20512e+09	2.5044e+09		P15880	P15880	RPS2	40S ribosomal protein S2, 40S ribosomal protein S4, Protein LLRep3, Small ribosomal subunit protein uS5	61	2.67767e+11
Q4G0J3	Q4G0J3	LARP7	La-related protein 7, La ribonucleoprotein domain family member 7, hLARP7, P-TEFb-interaction protein for 7SK stability, PIP7S	2.71103	0.0506297	0.0505077	0.0489011	0.0439219	0.0438161	0.0424223	0.00455796	0.00702018	0.00490194	0.000576256	0.000559531	0.000548096	12.6428	7.97033	11.1812	10.5981	2.3902	1.02523					P55265	P55265	ADAR	Double-stranded RNA-specific adenosine deaminase, DRADA, 3.5.4.37, 136 kDa double-stranded RNA-binding protein, p136, Interferon-inducible protein 4, IFI-4, K88DSRBP	44	3.53928	Yes		P14625	P14625	HSP90B1	Endoplasmin, 94 kDa glucose-regulated protein, GRP-94, Heat shock protein 90 kDa beta member 1, Tumor rejection antigen 1, gp96 homolog	68	1.55752e+10	1.34033e+10	1.47692e+10		P39023	P39023	RPL3	60S ribosomal protein L3, HIV-1 TAR RNA-binding protein B, TARBP-B, Large ribosomal subunit protein uL3	61	1.03045e+10
Q9BYJ9	Q9BYJ9	YTHDF1	YTH domain-containing family protein 1, DF1, Dermatomyositis associated with cancer putative autoantigen 1, DACA-1	2.28568	0.00270056	0.00269442	0.00208444	0.00224096	0.00223586	0.0017297	0.000346211	0.000214386	0.000239033	2.94014e-05	2.8552e-05	2.23477e-05	8.49235	13.318	9.34921	10.3865	2.57465	1.01647					Q14692	Q14692	BMS1	Ribosome biogenesis protein BMS1 homolog, Ribosome assembly protein BMS1 homolog	43	3.63035	Yes		P50990	P50990	CCT8	T-complex protein 1 subunit theta, TCP-1-theta, CCT-theta, Chaperonin containing T-complex polypeptide 1 subunit 8, Renal carcinoma antigen NY-REN-15	67	1.11594e+10	8.66948e+09	9.67558e+09		P61978	P61978	HNRNPK	Heterogeneous nuclear ribonucleoprotein K, hnRNP K, Transformation up-regulated nuclear protein, TUNP	60	4.65144e+10
P46777	P46777	RPL5	60S ribosomal protein L5, Large ribosomal subunit protein uL18	5.18992	2.85109	2.68624	2.70309	2.77507	2.61461	2.63101	0.279338	0.391184	0.35549	0.0364089	0.0333886	0.0339927	13.034	8.53527	9.56222	10.3772	2.35747	1.01608					P11498	P11498	PC	Pyruvate carboxylase, mitochondrial, 6.4.1.1, Pyruvic carboxylase, PCB	43	-0.0227387	Yes		O00571	O00571	DDX3X	ATP-dependent RNA helicase DDX3X, 3.6.4.13, CAP-Rf, DEAD box protein 3, X-chromosomal, DEAD box, X isoform, DBX, Helicase-like protein 2, HLP2	67	7.17247e+09	6.53075e+09	7.75865e+09		Q12906	Q12906	ILF3	Interleukin enhancer-binding factor 3, Double-stranded RNA-binding protein 76, DRBP76, M-phase phosphoprotein 4, MPP4, Nuclear factor associated with dsRNA, NFAR, Nuclear factor of activated T-cells 90 kDa, NF-AT-90, Translational control protein 80, TCP80	60	1.65273e+10
P07910	P07910	HNRNPC	Heterogeneous nuclear ribonucleoproteins C1/C2, hnRNP C1/C2	4.16381	2.80299	2.9056	2.95637	2.65487	2.75205	2.80015	0.261328	0.488392	0.353545	0.0348319	0.0351437	0.0361779	13.3288	7.1958	10.2329	10.2525	3.06657	1.01083					Q9UQ35	Q9UQ35	SRRM2	Serine/arginine repetitive matrix protein 2, 300 kDa nuclear matrix antigen, Serine/arginine-rich splicing factor-related nuclear matrix protein of 300 kDa, SR-related nuclear matrix protein of 300 kDa, Ser/Arg-related nuclear matrix protein of 300 kDa, Splicing coactivator subunit SRm300, Tax-responsive enhancer element-binding protein 803, TaxREB803	43	-10	No		P00558	P00558	PGK1	Phosphoglycerate kinase 1, 2.7.2.3, Cell migration-inducing gene 10 protein, Primer recognition protein 2, PRP 2	67	3.21816e+10	2.47883e+10	3.37097e+10		P55265	P55265	ADAR	Double-stranded RNA-specific adenosine deaminase, DRADA, 3.5.4.37, 136 kDa double-stranded RNA-binding protein, p136, Interferon-inducible protein 4, IFI-4, K88DSRBP	60	2.77614e+09
Q5T6F2	Q5T6F2	UBAP2	Ubiquitin-associated protein 2, UBAP-2, RNA polymerase II degradation factor UBAP2	5.18769	0.0368412	0.0385446	0.043135	0.0358573	0.0375153	0.0419831	0.00544099	0.0051113	0.00447802	0.000470448	0.00047907	0.000542421	8.64637	9.37276	12.113	10.044	1.82819	1.00191					P46777	P46777	RPL5	60S ribosomal protein L5, Large ribosomal subunit protein uL18	42	5.18992	Yes		P04406	P04406	GAPDH	Glyceraldehyde-3-phosphate dehydrogenase, GAPDH, 1.2.1.12, Peptidyl-cysteine S-nitrosylase GAPDH, 2.6.99.-	66	1.34729e+11	1.29377e+11	1.2775e+11		P22626	P22626	HNRNPA2B1	Heterogeneous nuclear ribonucleoproteins A2/B1, hnRNP A2/B1	58	2.2548e+11
P33240	P33240	CSTF2	Cleavage stimulation factor subunit 2, CF-1 64 kDa subunit, Cleavage stimulation factor 64 kDa subunit, CSTF 64 kDa subunit, CstF-64	3.82328	0.0380443	0.0395585	0.0499871	0.035534	0.0369483	0.0466888	0.00709292	0.00581413	0.00391183	0.000466206	0.00047183	0.000603219	6.57284	8.11523	15.4204	10.0362	4.72623	1.00157					Q8IWA0	Q8IWA0	WDR75	WD repeat-containing protein 75, U3 small nucleolar RNA-associated protein 17 homolog	42	5.08956	Yes		P12270	P12270	TPR	Nucleoprotein TPR, Megator, NPC-associated intranuclear protein, Translocated promoter region protein	65	2.02025e+09	1.15568e+09	1.51898e+09		Q6PKG0	Q6PKG0	LARP1	La-related protein 1, La ribonucleoprotein domain family member 1	58	4.05777e+09
Q8IUH3	Q8IUH3	RBM45	RNA-binding protein 45, Developmentally-regulated RNA-binding protein 1, RB-1, RNA-binding motif protein 45	3.01405	0.0109478	0.0103234	0.00935923	0.00974187	0.00918626	0.00832828	0.00127883	0.00150439	0.000895548	0.000127813	0.000117309	0.000107601	9.99454	7.79775	12.0151	9.93581	2.10931	0.997203					P48634	P48634	PRRC2A	Protein PRRC2A, HLA-B-associated transcript 2, Large proline-rich protein BAT2, Proline-rich and coiled-coil-containing protein 2A, Protein G2	42	3.6751	Yes		P11021	P11021	HSPA5	Endoplasmic reticulum chaperone BiP, 3.6.4.10, 78 kDa glucose-regulated protein, GRP-78, Binding-immunoglobulin protein, BiP, Heat shock protein 70 family protein 5, HSP70 family protein 5, Heat shock protein family A member 5, Immunoglobulin heavy chain-binding protein	65	2.07451e+10	1.56371e+10	1.65938e+10		P14866	P14866	HNRNPL	Heterogeneous nuclear ribonucleoprotein L, hnRNP L	57	7.92176e+10
O43390	O43390	HNRNPR	Heterogeneous nuclear ribonucleoprotein R, hnRNP R	4.88509	0.694563	0.64554	0.720156	0.671828	0.62441	0.696583	0.0817664	0.100263	0.0820409	0.00881439	0.00797371	0.00899985	10.78	7.9528	10.97	9.90091	1.68978	0.995675					P36578	P36578	RPL4	60S ribosomal protein L4, 60S ribosomal protein L1, Large ribosomal subunit protein uL4	41	3.12229	Yes		P61247	P61247	RPS3A	40S ribosomal protein S3a, Small ribosomal subunit protein eS1, v-fos transformation effector protein, Fte-1	64	1.79838e+10	2.05273e+10	1.76742e+10		O43390	O43390	HNRNPR	Heterogeneous nuclear ribonucleoprotein R, hnRNP R	57	4.05792e+10
P98179	P98179	RBM3	RNA-binding protein 3, RNA-binding motif protein 3, RNPL	4.5557	0.172583	0.190951	0.217864	0.165544	0.183163	0.208978	0.0234826	0.0257355	0.0253479	0.00217193	0.00233899	0.00269999	9.2491	9.08858	10.6517	9.66314	0.859897	0.985118					P36776	K7EJE8	LONP1	Lon protease homolog, mitochondrial, 3.4.21.53, Lon protease-like protein, LONP, Mitochondrial ATP-dependent protease Lon, Serine protease 15	41	0.154427	Yes		P22102	P22102	GART	Trifunctional purine biosynthetic protein adenosine-3, Phosphoribosylamine--glycine ligase, 6.3.4.13, Glycinamide ribonucleotide synthetase, GARS, Phosphoribosylglycinamide synthetase, Phosphoribosylformylglycinamidine cyclo-ligase, 6.3.3.1, AIR synthase, AIRS, Phosphoribosyl-aminoimidazole synthetase, Phosphoribosylglycinamide formyltransferase, 2.1.2.2, 5'-phosphoribosylglycinamide transformyla…	63	5.82881e+09	5.13784e+09	5.47941e+09		P11940	P11940	PABPC1	Polyadenylate-binding protein 1, PABP-1, Poly(A)-binding protein 1	57	2.91239e+10
Q96IZ5	Q96IZ5	RBM41	RNA-binding protein 41, RNA-binding motif protein 41	2.029	0.00253537	0.00197865	0.00224237	0.0020364	0.00158924	0.00180107	0.00038799	0.000231447	0.000179045	2.67176e-05	2.02946e-05	2.32698e-05	6.88615	8.7686	12.9966	9.55046	3.12936	0.980024					Q08J23	Q08J23	NSUN2	RNA cytosine C(5)-methyltransferase NSUN2, 2.1.1.-, Myc-induced SUN domain-containing protein, Misu, NOL1/NOP2/Sun domain family member 2, Substrate of AIM1/Aurora kinase B, mRNA cytosine C(5)-methyltransferase, tRNA cytosine C(5)-methyltransferase, 2.1.1.203, tRNA methyltransferase 4 homolog, hTrm4	41	-0.0827353	Yes		P07900	P07900	HSP90AA1	Heat shock protein HSP 90-alpha, 3.6.4.10, Heat shock 86 kDa, HSP 86, HSP86, Lipopolysaccharide-associated protein 2, LAP-2, LPS-associated protein 2, Renal carcinoma antigen NY-REN-38	63	2.49398e+10	2.2512e+10	2.35806e+10		P62917	P62917	RPL8	60S ribosomal protein L8, Large ribosomal subunit protein uL2	56	2.13599e+11
Q96EP5	Q96EP5	DAZAP1	DAZ-associated protein 1, Deleted in azoospermia-associated protein 1	5.58688	0.208994	0.218305	0.204147	0.204734	0.213855	0.199986	0.0240577	0.0306456	0.031021	0.00268611	0.00273093	0.00258382	11.1653	8.91133	8.32925	9.46862	1.4979	0.976287					P38159	P38159	RBMX	RNA-binding motif protein, X chromosome, Glycoprotein p43, Heterogeneous nuclear ribonucleoprotein G, hnRNP G	40	5.64628	Yes		P39023	P39023	RPL3	60S ribosomal protein L3, HIV-1 TAR RNA-binding protein B, TARBP-B, Large ribosomal subunit protein uL3	63	1.46104e+10	1.76883e+10	1.78547e+10		Q96PK6	Q96PK6	RBM14	RNA-binding protein 14, Paraspeckle protein 2, PSP2, RNA-binding motif protein 14, RRM-containing coactivator activator/modulator, Synaptotagmin-interacting protein, SYT-interacting protein	56	1.97371e+10
Q15427	Q15427	SF3B4	Splicing factor 3B subunit 4, Pre-mRNA-splicing factor SF3b 49 kDa subunit, Spliceosome-associated protein 49, SAP 49	4.9338	0.0133437	0.0139737	0.016631	0.0129209	0.013531	0.0161041	0.00178053	0.00227521	0.00191738	0.000169523	0.00017279	0.000208065	9.52093	7.59447	10.8515	9.3223	1.63758	0.969523					O60506	O60506	SYNCRIP	Heterogeneous nuclear ribonucleoprotein Q, hnRNP Q, Glycine- and tyrosine-rich RNA-binding protein, GRY-RBP, NS1-associated protein 1, Synaptotagmin-binding, cytoplasmic RNA-interacting protein	39	4.27317	Yes		P10809	P10809	HSPD1	60 kDa heat shock protein, mitochondrial, 5.6.1.7, 60 kDa chaperonin, Chaperonin 60, CPN60, Heat shock protein 60, HSP-60, Hsp60, HuCHA60, Mitochondrial matrix protein P1, P60 lymphocyte protein	63	3.69819e+10	2.45155e+10	3.18098e+10		Q96AE4	Q96AE4	FUBP1	Far upstream element-binding protein 1, FBP, FUSE-binding protein 1, DNA helicase V, hDH V	56	1.75061e+10
O43896	O43896	KIF1C	Kinesin-like protein KIF1C	4.64328	0.00686842	0.00779558	0.00580279	0.00660415	0.00749564	0.00557952	0.000593812	0.000999927	0.00193136	8.66465e-05	9.57193e-05	7.20874e-05	14.5916	9.57263	3.73246	9.29889	5.43473	0.968431					Q14671	Q14671	PUM1	Pumilio homolog 1, HsPUM, Pumilio-1	39	3.67685	Yes		P18206	P18206	VCL	Vinculin, Metavinculin, MV	63	4.93726e+09	2.39636e+09	3.97897e+09		O75691	O75691	UTP20	Small subunit processome component 20 homolog, Down-regulated in metastasis protein, Novel nucleolar protein 73, NNP73, Protein Key-1A6	56	2.92004e+09
Q8N3Z6	Q8N3Z6	ZCCHC7	Zinc finger CCHC domain-containing protein 7, TRAMP-like complex RNA-binding factor ZCCHC7	5.53229	0.00197389	0.00240997	0.00158157	0.00193214	0.002359	0.00154812	0.000257055	0.000358567	0.00021284	2.53496e-05	3.01244e-05	2.00017e-05	9.86156	8.40133	9.3975	9.22013	0.746103	0.964737					Q9NW13	Q9NW13	RBM28	RNA-binding protein 28, RNA-binding motif protein 28	39	3.23813	Yes		P31948	P31948	STIP1	Stress-induced-phosphoprotein 1, STI1, Hsc70/Hsp90-organizing protein, Hop, Renal carcinoma antigen NY-REN-11, Transformation-sensitive protein IEF SSP 3521	63	5.82118e+09	3.79207e+09	5.07607e+09		P61247	P61247	RPS3A	40S ribosomal protein S3a, Small ribosomal subunit protein eS1, v-fos transformation effector protein, Fte-1	56	8.11872e+09
P16989	P16989	YBX3	Y-box-binding protein 3, Cold shock domain-containing protein A, DNA-binding protein A, Single-strand DNA-binding protein NF-GMB	5.41516	0.47263	0.534541	0.450327	0.461807	0.5223	0.440015	0.0676007	0.072376	0.061927	0.00605891	0.00666977	0.00568499	8.96279	9.21546	9.18015	9.11947	0.136827	0.959969					Q99613	Q99613	EIF3C	Eukaryotic translation initiation factor 3 subunit C, eIF3c, Eukaryotic translation initiation factor 3 subunit 8, eIF3 p110	39	2.46427	Yes		P41252	P41252	IARS1	Isoleucine--tRNA ligase, cytoplasmic, 6.1.1.5, Isoleucyl-tRNA synthetase, IRS, IleRS	62	4.23417e+09	3.48871e+09	3.86047e+09		Q5JTH9	Q5JTH9	RRP12	RRP12-like protein	55	4.30692e+09
P29558	P29558	RBMS1	RNA-binding motif, single-stranded-interacting protein 1, Single-stranded DNA-binding protein MSSP-1, Suppressor of CDC2 with RNA-binding motif 2	6.06557	0.0302689	0.0311859	0.032276	0.0298236	0.0307272	0.0318012	0.00474502	0.00406034	0.00462459	0.000391286	0.000392386	0.000410871	8.24624	9.66387	8.88448	8.93153	0.709986	0.950926					Q92616	Q92616	GCN1	eIF-2-alpha kinase activator GCN1, GCN1 eIF-2-alpha kinase activator homolog, GCN1-like protein 1, General control of amino-acid synthesis 1-like protein 1, Translational activator GCN1, HsGCN1	39	0.721416	Yes		P26639	P26639	TARS1	Threonine--tRNA ligase 1, cytoplasmic, 6.1.1.3, Threonyl-tRNA synthetase, ThrRS, Threonyl-tRNA synthetase 1	62	9.29247e+09	7.53619e+09	9.14938e+09		P46087	P46087	NOP2	Probable 28S rRNA (cytosine(4447)-C(5))-methyltransferase, 2.1.1.-, Nucleolar protein 1, Nucleolar protein 2 homolog, Proliferating-cell nucleolar antigen p120, Proliferation-associated nucleolar protein p120	54	2.60983e+09
Q96CM3	Q96CM3	RPUSD4	Pseudouridylate synthase RPUSD4, mitochondrial, 5.4.99.-, RNA pseudouridylate synthase domain-containing protein 4	6.53983	0.00708675	0.00564883	0.00685329	0.0070114	0.00558876	0.00678042	0.00105886	0.000676628	0.00123701	9.19895e-05	7.13685e-05	8.7603e-05	8.68758	10.5477	7.08186	8.77237	1.73447	0.943117					Q96AE4	Q96AE4	FUBP1	Far upstream element-binding protein 1, FBP, FUSE-binding protein 1, DNA helicase V, hDH V	38	4.64642	Yes		Q7L2E3	Q7L2E3	DHX30	ATP-dependent RNA helicase DHX30, 3.6.4.13, DEAH box protein 30	62	2.12065e+09	2.10166e+09	1.96533e+09		P48634	P48634	PRRC2A	Protein PRRC2A, HLA-B-associated transcript 2, Large proline-rich protein BAT2, Proline-rich and coiled-coil-containing protein 2A, Protein G2	53	2.95552e+09
Q12849	Q12849	GRSF1	G-rich sequence factor 1, GRSF-1	3.44107	0.115359	0.126192	0.118168	0.105633	0.115553	0.108205	0.0161067	0.0164235	0.0163354	0.0013859	0.00147561	0.00139801	8.60453	8.98472	8.55817	8.71581	0.234035	0.940308					Q92879	Q92879	CELF1	CUGBP Elav-like family member 1, CELF-1, 50 kDa nuclear polyadenylated RNA-binding protein, Bruno-like protein 2, CUG triplet repeat RNA-binding protein 1, CUG-BP1, CUG-BP- and ETR-3-like factor 1, Deadenylation factor CUG-BP, Embryo deadenylation element-binding protein homolog, EDEN-BP homolog, RNA-binding protein BRUNOL-2	38	4.00461	Yes		P07355	P07355	ANXA2	Annexin A2, Annexin II, Annexin-2, Calpactin I heavy chain, Calpactin-1 heavy chain, Chromobindin-8, Lipocortin II, Placental anticoagulant protein IV, PAP-IV, Protein I, p36	62	2.13773e+10	1.82023e+10	2.216e+10		P21333	P21333	FLNA	Filamin-A, FLN-A, Actin-binding protein 280, ABP-280, Alpha-filamin, Endothelial actin-binding protein, Filamin-1, Non-muscle filamin	53	1.4013e+09
P22626	P22626	HNRNPA2B1	Heterogeneous nuclear ribonucleoproteins A2/B1, hnRNP A2/B1	4.65584	3.85937	3.92423	4.19192	3.71211	3.7745	4.03198	0.573566	0.601519	0.570989	0.0487029	0.0482004	0.0520932	8.49125	8.01312	9.12333	8.54256	0.556881	0.931588					Q6PKG0	Q6PKG0	LARP1	La-related protein 1, La ribonucleoprotein domain family member 1	38	3.56044	Yes		P55072	P55072	VCP	Transitional endoplasmic reticulum ATPase, TER ATPase, 3.6.4.6, 15S Mg(2+)-ATPase p97 subunit, Valosin-containing protein, VCP	62	8.7109e+09	4.93923e+09	6.90791e+09		Q15717	Q15717	ELAVL1	ELAV-like protein 1, Hu-antigen R, HuR	52	1.65835e+11
Q9BYK8	Q9BYK8	HELZ2	Helicase with zinc finger domain 2, ATP-dependent helicase PRIC285, Helicase with zinc finger 2, transcriptional coactivator, PPAR-alpha-interacting complex protein 285, PPAR-gamma DNA-binding domain-interacting protein 1, PDIP1, PPAR-gamma DBD-interacting protein 1, Peroxisomal proliferator-activated receptor A-interacting complex 285 kDa protein, 3.6.4.-	4.13508	0.00791662	0.00693419	0.00631654	0.00749032	0.00656079	0.0059764	0.000721299	0.00138367	0.00130541	9.8273e-05	8.37813e-05	7.72151e-05	13.6244	6.05501	5.91499	8.53148	4.41119	0.931024					O75153	O75153	CLUH	Clustered mitochondria protein homolog	38	3.24612	Yes		P09874	P09874	PARP1	Poly [ADP-ribose] polymerase, 2.4.2.30	62	5.48111e+09	4.60004e+09	4.52989e+09		Q9BZE4	Q9BZE4	GTPBP4	GTP-binding protein 4, Chronic renal failure gene protein, GTP-binding protein NGB, Nucleolar GTP-binding protein 1	52	5.13979e+09
Q9BYD1	Q9BYD1	MRPL13	39S ribosomal protein L13, mitochondrial, L13mt, MRP-L13, Mitochondrial large ribosomal subunit protein uL13m	2.6683	0.0498992	0.0475295	0.0407688	0.0431165	0.0410689	0.0352272	0.00624703	0.00561662	0.00641163	0.000565688	0.000524449	0.000455135	9.05531	9.33745	7.09859	8.49711	1.21935	0.929271					P31943	P31943	HNRNPH1	Heterogeneous nuclear ribonucleoprotein H, hnRNP H	37	4.59917	Yes		P11142	P11142	HSPA8	Heat shock cognate 71 kDa protein, 3.6.4.10, Heat shock 70 kDa protein 8, Lipopolysaccharide-associated protein 1, LAP-1, LPS-associated protein 1	62	8.56321e+10	7.01526e+10	7.21978e+10		P23396	P23396	RPS3	40S ribosomal protein S3, 4.2.99.18, Small ribosomal subunit protein uS3	52	2.25612e+10
Q9NVS2	Q9NVS2	MRPS18A	39S ribosomal protein S18a, mitochondrial, MRP-S18-a, Mrps18a, S18mt-a, 39S ribosomal protein S18-3, mitochondrial, MRP-S18-3, Mitochondrial large ribosomal subunit protein bS18a, Mitochondrial large ribosomal subunit protein mL66	3.79709	0.0429217	0.0444235	0.0387152	0.0400412	0.0414422	0.036117	0.00572865	0.00645574	0.00579395	0.000525341	0.000529217	0.000466631	9.17041	8.19762	8.05377	8.47393	0.607442	0.928085					P07910	P07910	HNRNPC	Heterogeneous nuclear ribonucleoproteins C1/C2, hnRNP C1/C2	37	4.16381	Yes		P29401	P29401	TKT	Transketolase, TK, 2.2.1.1	60	2.55684e+10	2.25416e+10	2.57634e+10		Q96T37	Q96T37	RBM15	RNA-binding protein 15, One-twenty two protein 1, RNA-binding motif protein 15	50	5.50607e+09
Q9H0J9	Q9H0J9	PARP12	Protein mono-ADP-ribosyltransferase PARP12, 2.4.2.-, ADP-ribosyltransferase diphtheria toxin-like 12, ARTD12, Poly [ADP-ribose] polymerase 12, PARP-12, Zinc finger CCCH domain-containing protein 1	2.7116	0.024825	0.0215339	0.0214421	0.0215372	0.018682	0.0186023	0.00281665	0.00370944	0.00275828	0.000282568	0.000238569	0.000240342	10.032	6.43139	8.71347	8.3923	1.82169	0.923881					P27816	P27816	MAP4	Microtubule-associated protein 4, MAP-4	37	3.78377	Yes		Q99613	Q99613	EIF3C	Eukaryotic translation initiation factor 3 subunit C, eIF3c, Eukaryotic translation initiation factor 3 subunit 8, eIF3 p110	60	3.93052e+09	3.83179e+09	4.62875e+09		Q14103	Q14103	HNRNPD	Heterogeneous nuclear ribonucleoprotein D0, hnRNP D0, AU-rich element RNA-binding protein 1	50	2.38655e+10
P19338	P19338	NCL	Nucleolin, Protein C23	5.36848	6.93702	8.04179	8.39642	6.77307	7.85173	8.19798	0.942739	1.78616	1.24936	0.0888626	0.100267	0.105918	9.42601	5.61353	8.47778	7.83911	1.98486	0.894267					Q02241	Q02241	KIF23	Kinesin-like protein KIF23, Kinesin-like protein 5, Mitotic kinesin-like protein 1	37	-0.205131	Yes		Q04637	Q04637	EIF4G1	Eukaryotic translation initiation factor 4 gamma 1, eIF-4-gamma 1, eIF-4G 1, eIF-4G1, p220	60	5.17812e+09	4.18019e+09	4.28705e+09		Q02543	Q02543	RPL18A	60S ribosomal protein L18a, Large ribosomal subunit protein eL20	50	3.88712e+10
Q14692	Q14692	BMS1	Ribosome biogenesis protein BMS1 homolog, Ribosome assembly protein BMS1 homolog	3.63035	0.116123	0.118486	0.123722	0.107447	0.109633	0.114477	0.0183722	0.0214967	0.0159033	0.0014097	0.00140001	0.00147905	7.67301	6.5127	9.30024	7.82865	1.40027	0.893687					P13010	P13010	XRCC5	X-ray repair cross-complementing protein 5, 3.6.4.-, 86 kDa subunit of Ku antigen, ATP-dependent DNA helicase 2 subunit 2, ATP-dependent DNA helicase II 80 kDa subunit, CTC box-binding factor 85 kDa subunit, CTC85, CTCBF, DNA repair protein XRCC5, Ku80, Ku86, Lupus Ku autoantigen protein p86, Nuclear factor IV, Thyroid-lupus autoantigen, TLAA, X-ray repair complementing defective repair in Chines…	36	2.98433	Yes		P23588	P23588	EIF4B	Eukaryotic translation initiation factor 4B, eIF-4B	59	8.08292e+09	8.03221e+09	8.3011e+09		O76021	O76021	RSL1D1	Ribosomal L1 domain-containing protein 1, CATX-11, Cellular senescence-inhibited gene protein, Protein PBK1	50	1.45259e+10
O75179	O75179	ANKRD17	Ankyrin repeat domain-containing protein 17, Gene trap ankyrin repeat protein, Serologically defined breast cancer antigen NY-BR-16	4.77899	0.02578	0.024377	0.0315279	0.024874	0.0235203	0.0304199	0.00426322	0.00384316	0.00494996	0.000326347	0.000300354	0.000393025	7.65494	7.81528	7.93995	7.80339	0.142874	0.892283					Q14204	Q14204	DYNC1H1	Cytoplasmic dynein 1 heavy chain 1, Cytoplasmic dynein heavy chain 1, Dynein heavy chain, cytosolic	36	-0.180861	Yes		P46777	P46777	RPL5	60S ribosomal protein L5, Large ribosomal subunit protein uL18	59	1.63192e+10	2.28536e+10	2.07683e+10		Q9UQ80	Q9UQ80	PA2G4	Proliferation-associated protein 2G4, Cell cycle protein p38-2G4 homolog, hG4-1, ErbB3-binding protein 1	49	1.31923e+10
Q9NRA8	Q9NRA8	EIF4ENIF1	Eukaryotic translation initiation factor 4E transporter, 4E-T, eIF4E transporter, Eukaryotic translation initiation factor 4E nuclear import factor 1	6.4225	0.000949756	0.000942688	0.00096234	0.000938811	0.000931825	0.00095125	0.0002123	0.000137659	0.000140617	1.23172e-05	1.18994e-05	1.22902e-05	5.8018	8.6441	8.74014	7.72868	1.66942	0.888105					P52597	P52597	HNRNPF	Heterogeneous nuclear ribonucleoprotein F, hnRNP F, Nucleolin-like protein mcs94-1	35	4.84274	Yes		Q08J23	Q08J23	NSUN2	RNA cytosine C(5)-methyltransferase NSUN2, 2.1.1.-, Myc-induced SUN domain-containing protein, Misu, NOL1/NOP2/Sun domain family member 2, Substrate of AIM1/Aurora kinase B, mRNA cytosine C(5)-methyltransferase, tRNA cytosine C(5)-methyltransferase, 2.1.1.203, tRNA methyltransferase 4 homolog, hTrm4	59	4.4008e+09	3.33884e+09	4.30049e+09		Q04637	Q04637	EIF4G1	Eukaryotic translation initiation factor 4 gamma 1, eIF-4-gamma 1, eIF-4G 1, eIF-4G1, p220	49	2.38828e+09
Q9NZB2	Q9NZB2	FAM120A	Constitutive coactivator of PPAR-gamma-like protein 1, Oxidative stress-associated Src activator, Protein FAM120A	3.35508	0.170454	0.159177	0.158731	0.155279	0.145006	0.144599	0.022629	0.0248652	0.0284946	0.00203726	0.00185173	0.00186822	9.00288	7.44706	6.55641	7.66878	1.23821	0.884726					O75179	O75179	ANKRD17	Ankyrin repeat domain-containing protein 17, Gene trap ankyrin repeat protein, Serologically defined breast cancer antigen NY-BR-16	35	4.77899	Yes		Q9Y490	Q9Y490	TLN1	Talin-1	58	2.43404e+09	1.45472e+09	2.02406e+09		Q8IX01	Q8IX01	SUGP2	SURP and G-patch domain-containing protein 2, Arginine/serine-rich-splicing factor 14, Splicing factor, arginine/serine-rich 14	48	1.70091e+09
P67809	P67809	YBX1	Y-box-binding protein 1, YB-1, CCAAT-binding transcription factor I subunit A, CBF-A, DNA-binding protein B, DBPB, Enhancer factor I subunit A, EFI-A, Nuclease-sensitive element-binding protein 1, Y-box transcription factor	3.0402	0.446565	0.554603	0.540985	0.398162	0.49449	0.482349	0.0754045	0.0837218	0.0731388	0.00522389	0.00631464	0.00623194	6.92782	7.54241	8.52071	7.66365	0.803336	0.884435					Q9UQ80	Q9UQ80	PA2G4	Proliferation-associated protein 2G4, Cell cycle protein p38-2G4 homolog, hG4-1, ErbB3-binding protein 1	35	3.49487	Yes		P02786	P02786	TFRC	Transferrin receptor protein 1, TR, TfR, TfR1, Trfr, T9, p90, CD71	57	1.11409e+10	9.61094e+09	1.10305e+10		Q9H6S0	Q9H6S0	YTHDC2	3'-5' RNA helicase YTHDC2, 3.6.4.13, YTH domain-containing protein 2, hYTHDC2	48	1.21401e+09
Q8IWA0	Q8IWA0	WDR75	WD repeat-containing protein 75, U3 small nucleolar RNA-associated protein 17 homolog	5.08956	0.0938525	0.0841107	0.0737844	0.0911748	0.0817109	0.0716792	0.0134138	0.0161545	0.0126498	0.00119621	0.00104345	0.000926096	8.91779	6.45919	7.32102	7.566	1.24747	0.878866					Q96PK6	Q96PK6	RBM14	RNA-binding protein 14, Paraspeckle protein 2, PSP2, RNA-binding motif protein 14, RRM-containing coactivator activator/modulator, Synaptotagmin-interacting protein, SYT-interacting protein	34	4.64739	Yes		P27816	P27816	MAP4	Microtubule-associated protein 4, MAP-4	57	4.71475e+09	5.31163e+09	5.17858e+09		Q99575	Q99575	POP1	Ribonucleases P/MRP protein subunit POP1, hPOP1	48	3.37951e+09
Q9UGR2	Q9UGR2	ZC3H7B	Zinc finger CCCH domain-containing protein 7B, Rotavirus 'X'-associated non-structural protein, RoXaN	4.41682	0.0247108	0.0230183	0.0242198	0.0236056	0.0219889	0.0231366	0.00371334	0.00445557	0.00372217	0.000309706	0.000280798	0.000298925	8.34035	6.30217	8.03093	7.55782	1.09837	0.878396					O60287	O60287	URB1	Nucleolar pre-ribosomal-associated protein 1, Nucleolar protein 254 kDa, URB1 ribosome biogenesis 1 homolog	34	0.789739	Yes		P26640	P26640	VARS1	Valine--tRNA ligase, 6.1.1.9, Protein G7a, Valyl-tRNA synthetase, ValRS	56	4.24249e+09	3.47266e+09	3.79772e+09		Q13310	Q13310	PABPC4	Polyadenylate-binding protein 4, PABP-4, Poly(A)-binding protein 4, Activated-platelet protein 1, APP-1, Inducible poly(A)-binding protein, iPABP	48	1.0274e+10
Q14011	Q14011	CIRBP	Cold-inducible RNA-binding protein, A18 hnRNP, Glycine-rich RNA-binding protein CIRP	6.41481	0.0595366	0.062309	0.0630854	0.0588469	0.0615871	0.0623545	0.00789322	0.0119431	0.0131766	0.000772071	0.000786468	0.000805621	9.78144	6.58514	6.11403	7.49354	1.99534	0.874687					P40939	P40939	HADHA	Trifunctional enzyme subunit alpha, mitochondrial, 78 kDa gastrin-binding protein, Monolysocardiolipin acyltransferase, 2.3.1.-, TP-alpha, Long-chain enoyl-CoA hydratase, 4.2.1.17, Long chain 3-hydroxyacyl-CoA dehydrogenase, 1.1.1.211	34	-0.189851	Yes		Q99832	Q99832	CCT7	T-complex protein 1 subunit eta, TCP-1-eta, CCT-eta, HIV-1 Nef-interacting protein	56	9.51437e+09	7.24826e+09	9.08808e+09		P13010	P13010	XRCC5	X-ray repair cross-complementing protein 5, 3.6.4.-, 86 kDa subunit of Ku antigen, ATP-dependent DNA helicase 2 subunit 2, ATP-dependent DNA helicase II 80 kDa subunit, CTC box-binding factor 85 kDa subunit, CTC85, CTCBF, DNA repair protein XRCC5, Ku80, Ku86, Lupus Ku autoantigen protein p86, Nuclear factor IV, Thyroid-lupus autoantigen, TLAA, X-ray repair complementing defective repair in Chines…	48	3.64155e+09
Q92804	Q92804	TAF15	TATA-binding protein-associated factor 2N, 68 kDa TATA-binding protein-associated factor, TAF(II)68, TAFII68, RNA-binding protein 56	6.58324	0.112099	0.107313	0.097026	0.110942	0.106205	0.0960246	0.0161449	0.0175072	0.0221971	0.00145556	0.00135624	0.00124064	9.01557	7.74679	5.58917	7.45051	1.7323	0.872186					O00411	O00411	POLRMT	DNA-directed RNA polymerase, mitochondrial, MtRPOL, 2.7.7.6	34	-5.11982	Yes		Q86VP6	Q86VP6	CAND1	Cullin-associated NEDD8-dissociated protein 1, Cullin-associated and neddylation-dissociated protein 1, TBP-interacting protein of 120 kDa A, TBP-interacting protein 120A, p120 CAND1	55	4.43196e+09	3.72743e+09	3.66733e+09		P35579	P35579	MYH9	Myosin, heavy polypeptide 9, non-muscle, isoform CRA_a	48	1.25704e+09
Q99729	Q99729	HNRNPAB	Heterogeneous nuclear ribonucleoprotein A/B, hnRNP A/B, APOBEC1-binding protein 1, ABBP-1	4.65522	0.306842	0.288511	0.310239	0.29513	0.277498	0.298397	0.0482508	0.0525098	0.0516078	0.0038721	0.00354365	0.00385529	8.02496	6.74856	7.47036	7.41463	0.640023	0.870089					A0AV96	A0AV96	RBM47	RNA-binding protein 47, RNA-binding motif protein 47	33	5.39206	Yes		Q9P2J5	Q9P2J5	LARS1	Leucine--tRNA ligase, cytoplasmic, 6.1.1.4, Leucyl-tRNA synthetase, LeuRS	55	2.57803e+09	1.86815e+09	2.11336e+09		Q8WXF1	Q8WXF1	PSPC1	Paraspeckle component 1, Paraspeckle protein 1	47	4.15929e+09
Q00577	Q00577	PURA	Transcriptional activator protein Pur-alpha, Purine-rich single-stranded DNA-binding protein alpha	7.5099	0.0263642	0.0282254	0.0226259	0.0262203	0.0280714	0.0225024	0.00467031	0.00454151	0.00432185	0.00034401	0.000358471	0.000290731	7.3659	7.89321	6.72702	7.32871	0.583988	0.865027					P15880	P15880	RPS2	40S ribosomal protein S2, 40S ribosomal protein S4, Protein LLRep3, Small ribosomal subunit protein uS5	33	5.36865	Yes		Q9Y520	Q9Y520	PRRC2C	Protein PRRC2C, BAT2 domain-containing protein 1, HBV X-transactivated gene 2 protein, HBV XAg-transactivated protein 2, HLA-B-associated transcript 2-like 2, Proline-rich and coiled-coil-containing protein 2C	55	1.12564e+09	9.52726e+08	1.07522e+09		P07910	P07910	HNRNPC	Heterogeneous nuclear ribonucleoproteins C1/C2, hnRNP C1/C2	47	1.63762e+11
P35637	P35637	FUS	RNA-binding protein FUS, 75 kDa DNA-pairing protein, Oncogene FUS, Oncogene TLS, POMp75, Translocated in liposarcoma protein	5.03471	0.423301	0.402262	0.394631	0.410769	0.390353	0.382949	0.0727169	0.0634244	0.0748829	0.0053893	0.00498481	0.0049477	7.41134	7.85946	6.60725	7.29268	0.634483	0.862887					Q15269	Q15269	PWP2	Periodic tryptophan protein 2 homolog	33	3.46815	Yes		P49792	P49792	RANBP2	E3 SUMO-protein ligase RanBP2, 2.3.2.-, 358 kDa nucleoporin, Nuclear pore complex protein Nup358, Nucleoporin Nup358, Ran-binding protein 2, RanBP2, p270	55	2.49297e+09	2.1827e+09	1.96202e+09		Q9NZI8	Q9NZI8	IGF2BP1	Insulin-like growth factor 2 mRNA-binding protein 1, IGF2 mRNA-binding protein 1, IMP-1, IMP1, Coding region determinant-binding protein, CRD-BP, IGF-II mRNA-binding protein 1, VICKZ family member 1, Zipcode-binding protein 1, ZBP-1	47	1.06446e+10
O14979	O14979	HNRNPDL	Heterogeneous nuclear ribonucleoprotein D-like, hnRNP D-like, hnRNP DL, AU-rich element RNA-binding factor, JKT41-binding protein, Protein laAUF1	7.48431	0.152712	0.161921	0.161295	0.151863	0.161022	0.1604	0.0316131	0.0275902	0.0258212	0.00199245	0.00205625	0.00207236	6.3026	7.45282	8.0258	7.26041	0.877567	0.860961					O75533	O75533	SF3B1	Splicing factor 3B subunit 1, Pre-mRNA-splicing factor SF3b 155 kDa subunit, SF3b155, Spliceosome-associated protein 155, SAP 155	33	3.0454	Yes		Q5VYK3	Q5VYK3	ECPAS	Proteasome adapter and scaffold protein ECM29, Ecm29 proteasome adapter and scaffold, Proteasome-associated protein ECM29 homolog	54	1.78912e+09	1.42292e+09	1.56641e+09		Q13148	Q13148	TARDBP	TAR DNA-binding protein 43, TDP-43	46	5.85175e+10
Q8WVV9	Q8WVV9	HNRNPLL	Heterogeneous nuclear ribonucleoprotein L-like, hnRNPLL, Stromal RNA-regulating factor	3.16789	0.0169194	0.0169351	0.0158387	0.0152253	0.0152394	0.0142528	0.00237902	0.00291726	0.00282949	0.000199756	0.000194607	0.000184146	8.39654	6.67088	6.50812	7.19185	1.04647	0.85684					Q99575	Q99575	POP1	Ribonucleases P/MRP protein subunit POP1, hPOP1	33	3.00149	Yes		P61978	P61978	HNRNPK	Heterogeneous nuclear ribonucleoprotein K, hnRNP K, Transformation up-regulated nuclear protein, TUNP	54	1.31103e+10	1.37983e+10	1.29561e+10		P52597	P52597	HNRNPF	Heterogeneous nuclear ribonucleoprotein F, hnRNP F, Nucleolin-like protein mcs94-1	46	6.44634e+10
Q9NZI8	Q9NZI8	IGF2BP1	Insulin-like growth factor 2 mRNA-binding protein 1, IGF2 mRNA-binding protein 1, IMP-1, IMP1, Coding region determinant-binding protein, CRD-BP, IGF-II mRNA-binding protein 1, VICKZ family member 1, Zipcode-binding protein 1, ZBP-1	3.4699	0.182195	0.222577	0.163954	0.167113	0.204152	0.150382	0.0338904	0.0325904	0.0280869	0.00219252	0.00260703	0.00194293	6.46944	7.99937	6.91758	7.1288	0.786534	0.853016					P24928	P24928	POLR2A	DNA-directed RNA polymerase II subunit RPB1, RNA polymerase II subunit B1, 2.7.7.6, DNA-directed RNA polymerase II subunit A, DNA-directed RNA polymerase III largest subunit, RNA-directed RNA polymerase II subunit RPB1, 2.7.7.48	33	0.932952	Yes		P49368	P49368	CCT3	T-complex protein 1 subunit gamma, TCP-1-gamma, CCT-gamma, hTRiC5	54	1.13864e+10	9.04072e+09	1.01719e+10		Q9NVN8	Q9NVN8	GNL3L	Guanine nucleotide-binding protein-like 3-like protein	46	3.39302e+09
P48634	P48634	PRRC2A	Protein PRRC2A, HLA-B-associated transcript 2, Large proline-rich protein BAT2, Proline-rich and coiled-coil-containing protein 2A, Protein G2	3.6751	0.0505874	0.0550188	0.0557951	0.0469146	0.0510243	0.0517443	0.0101831	0.00788777	0.00962263	0.000615519	0.000651581	0.000668536	6.04455	8.26065	6.94754	7.08424	1.11436	0.850294					Q07065	Q07065	CKAP4	Cytoskeleton-associated protein 4, 63-kDa cytoskeleton-linking membrane protein, Climp-63, p63	32	4.10996	Yes		P07237	P07237	P4HB	Protein disulfide-isomerase, PDI, 5.3.4.1, Cellular thyroid hormone-binding protein, Prolyl 4-hydroxylase subunit beta, p55	54	8.47703e+09	5.33884e+09	7.15263e+09		Q8TED0	Q8TED0	UTP15	U3 small nucleolar RNA-associated protein 15 homolog	46	3.1531e+09
Q13151	Q13151	HNRNPA0	Heterogeneous nuclear ribonucleoprotein A0, hnRNP A0	5.03463	0.240329	0.239424	0.222759	0.233214	0.232335	0.216164	0.0380179	0.049094	0.0399545	0.00305977	0.00296692	0.00279284	8.04824	6.04335	6.99006	7.02722	1.00296	0.846783					D3DTW3	Q9NZI8	IGF2BP1	Insulin-like growth factor 2 mRNA-binding protein 1, IGF2 mRNA-binding protein 1, IMP-1, IMP1, Coding region determinant-binding protein, CRD-BP, IGF-II mRNA-binding protein 1, VICKZ family member 1, Zipcode-binding protein 1, ZBP-1	32	3.4699	Yes		Q14683	Q14683	SMC1A	Structural maintenance of chromosomes protein 1A, SMC protein 1A, SMC-1-alpha, SMC-1A, Sb1.8	54	2.80217e+09	2.5303e+09	2.22436e+09		P18124	P18124	RPL7	60S ribosomal protein L7, Large ribosomal subunit protein uL30	46	2.11192e+10
Q96P11	Q96P11	NSUN5	28S rRNA (cytosine-C(5))-methyltransferase, 2.1.1.-, NOL1-related protein, NOL1R, NOL1/NOP2/Sun domain family member 5, Williams-Beuren syndrome chromosomal region 20A protein	3.478	0.0292226	0.0283953	0.0262401	0.0268159	0.0260568	0.0240791	0.00556041	0.00465229	0.0041285	0.000351825	0.000332745	0.000311101	6.32732	7.15229	7.53546	7.00502	0.617385	0.845409					Q96KR1	Q96KR1	ZFR	Zinc finger RNA-binding protein, hZFR, M-phase phosphoprotein homolog	32	3.17353	Yes		Q92900	Q92900	UPF1	Regulator of nonsense transcripts 1, 3.6.4.12, 3.6.4.13, ATP-dependent helicase RENT1, Nonsense mRNA reducing factor 1, NORF1, Up-frameshift suppressor 1 homolog, hUpf1	53	2.47954e+09	2.12683e+09	2.4242e+09		Q92616	Q92616	GCN1	eIF-2-alpha kinase activator GCN1, GCN1 eIF-2-alpha kinase activator homolog, GCN1-like protein 1, General control of amino-acid synthesis 1-like protein 1, Translational activator GCN1, HsGCN1	46	6.11924e+08
Q9Y520	Q9Y520	PRRC2C	Protein PRRC2C, BAT2 domain-containing protein 1, HBV X-transactivated gene 2 protein, HBV XAg-transactivated protein 2, HLA-B-associated transcript 2-like 2, Proline-rich and coiled-coil-containing protein 2C	3.83562	0.0945896	0.0972762	0.116744	0.088398	0.0909087	0.109102	0.0192677	0.0163078	0.0184045	0.00115978	0.0011609	0.0014096	6.01929	7.11872	7.65902	6.93234	0.835603	0.84088					P38646	P38646	HSPA9	Stress-70 protein, mitochondrial, 75 kDa glucose-regulated protein, GRP-75, Heat shock 70 kDa protein 9, Mortalin, MOT, Peptide-binding protein 74, PBP74	32	1.11579	Yes		O43707	O43707	ACTN4	Alpha-actinin-4, Non-muscle alpha-actinin 4	53	8.99002e+09	5.1728e+09	6.81955e+09		P31327	P31327	CPS1	Carbamoyl-phosphate synthase [ammonia], mitochondrial, 6.3.4.16, Carbamoyl-phosphate synthetase I, CPSase I	46	1.15263e+09
Q96QC0	Q96QC0	PPP1R10	Serine/threonine-protein phosphatase 1 regulatory subunit 10, MHC class I region proline-rich protein CAT53, PP1-binding protein of 114 kDa, Phosphatase 1 nuclear targeting subunit, Protein FB19, p99	5.37111	0.0214582	0.0205878	0.0194626	0.0209519	0.0201021	0.0190034	0.00380168	0.00423397	0.00328599	0.000274889	0.000256703	0.000245524	7.23074	6.06294	7.47185	6.92184	0.753536	0.840222					P62917	P62917	RPL8	60S ribosomal protein L8, Large ribosomal subunit protein uL2	31	5.06075	Yes		P25705	P25705	ATP5F1A	ATP synthase subunit alpha, mitochondrial, ATP synthase F1 subunit alpha	53	1.27268e+10	1.03488e+10	1.07914e+10		Q9UKM9	Q9UKM9	RALY	RNA-binding protein Raly, Autoantigen p542, Heterogeneous nuclear ribonucleoprotein C-like 2, hnRNP core protein C-like 2, hnRNP associated with lethal yellow protein homolog	45	5.39813e+10
O43823	O43823	AKAP8	A-kinase anchor protein 8, AKAP-8, A-kinase anchor protein 95 kDa, AKAP 95	2.81498	0.0226857	0.0237816	0.0246727	0.019863	0.0208226	0.0216028	0.00411828	0.00331773	0.00438286	0.000260603	0.000265905	0.000279108	6.32796	8.01465	6.36818	6.90359	0.962414	0.839075					Q9UKM9	Q9UKM9	RALY	RNA-binding protein Raly, Autoantigen p542, Heterogeneous nuclear ribonucleoprotein C-like 2, hnRNP core protein C-like 2, hnRNP associated with lethal yellow protein homolog	31	4.89993	Yes		O75153	O75153	CLUH	Clustered mitochondria protein homolog	52	2.70993e+09	2.33815e+09	2.41096e+09		Q4G0J3	Q4G0J3	LARP7	La-related protein 7, La ribonucleoprotein domain family member 7, hLARP7, P-TEFb-interaction protein for 7SK stability, PIP7S	45	2.95799e+09
Q5JSZ5	Q5JSZ5	PRRC2B	Protein PRRC2B, HLA-B-associated transcript 2-like 1, Proline-rich coiled-coil protein 2B	3.80401	0.0050384	0.00551909	0.00611267	0.00470178	0.00515035	0.00570427	0.00137922	0.00073589	0.00103179	6.16873e-05	6.577e-05	7.36992e-05	4.47263	8.93747	7.14284	6.85098	2.24668	0.835753					Q15717	Q15717	ELAVL1	ELAV-like protein 1, Hu-antigen R, HuR	31	4.80957	Yes		P46087	P46087	NOP2	Probable 28S rRNA (cytosine(4447)-C(5))-methyltransferase, 2.1.1.-, Nucleolar protein 1, Nucleolar protein 2 homolog, Proliferating-cell nucleolar antigen p120, Proliferation-associated nucleolar protein p120	52	3.22743e+09	3.59341e+09	3.16818e+09		Q15269	Q15269	PWP2	Periodic tryptophan protein 2 homolog	45	3.36103e+09
Q07666	Q07666	KHDRBS1	KH domain-containing, RNA-binding, signal transduction-associated protein 1, GAP-associated tyrosine phosphoprotein p62, Src-associated in mitosis 68 kDa protein, Sam68, p21 Ras GTPase-activating protein-associated p62, p68	5.9831	0.159296	0.171967	0.157974	0.156817	0.169291	0.155515	0.0349995	0.0246397	0.03781	0.00205744	0.00216184	0.00200926	5.8785	8.77381	5.3141	6.65547	1.85612	0.823179					P21333	P21333	FLNA	Filamin-A, FLN-A, Actin-binding protein 280, ABP-280, Alpha-filamin, Endothelial actin-binding protein, Filamin-1, Non-muscle filamin	31	1.11796	Yes		P23396	P23396	RPS3	40S ribosomal protein S3, 4.2.99.18, Small ribosomal subunit protein uS3	52	2.08191e+10	2.40974e+10	2.01822e+10		P07814	P07814	EPRS1	Bifunctional glutamate/proline--tRNA ligase, Bifunctional aminoacyl-tRNA synthetase, Cell proliferation-inducing gene 32 protein, Glutamatyl-prolyl-tRNA synthetase, Glutamate--tRNA ligase, 6.1.1.17, Glutamyl-tRNA synthetase, GluRS, Proline--tRNA ligase, 6.1.1.15, Prolyl-tRNA synthetase	45	7.88707e+08
Q9BWF3	Q9BWF3	RBM4	RNA-binding protein 4, Lark homolog, hLark, RNA-binding motif protein 4, RNA-binding motif protein 4a	1.91182	0.0862572	0.0867171	0.0965437	0.0681467	0.0685101	0.0762735	0.0141296	0.014581	0.0129501	0.000894085	0.000874874	0.000985453	6.32774	6.0001	7.60963	6.64582	0.850605	0.822549					O14578	O14578	CIT	Citron Rho-interacting kinase, CRIK, 2.7.11.1, Serine/threonine-protein kinase 21	31	1.05411	Yes		P47897	P47897	QARS1	Glutamine--tRNA ligase, 6.1.1.18, Glutaminyl-tRNA synthetase, GlnRS	52	3.01785e+09	2.32203e+09	2.66728e+09		P51991	P51991	HNRNPA3	Heterogeneous nuclear ribonucleoprotein A3, hnRNP A3	44	4.03389e+10
P42704	P42704	LRPPRC	Leucine-rich PPR motif-containing protein, mitochondrial, 130 kDa leucine-rich protein, LRP 130, GP130	2.79263	0.984416	0.939365	0.88131	0.860261	0.820891	0.770159	0.171406	0.141274	0.168686	0.0112866	0.0104828	0.00995045	6.58473	7.42017	5.8988	6.63457	0.761909	0.821813					P51991	P51991	HNRNPA3	Heterogeneous nuclear ribonucleoprotein A3, hnRNP A3	30	6.10006	Yes		P14866	P14866	HNRNPL	Heterogeneous nuclear ribonucleoprotein L, hnRNP L	51	7.08539e+09	8.53555e+09	7.23611e+09		Q9NYF8	Q9NYF8	BCLAF1	Bcl-2-associated transcription factor 1, Btf, BCLAF1 and THRAP3 family member 1	44	3.3081e+09
Q9HCE1	Q9HCE1	MOV10	Helicase MOV-10, 3.6.4.13, Armitage homolog, Moloney leukemia virus 10 protein	5.05126	0.142202	0.12644	0.123685	0.138039	0.122739	0.120064	0.0239737	0.0255012	0.0256001	0.00181107	0.00156737	0.00155123	7.55441	6.14627	6.05946	6.58671	0.839173	0.818669					P09651	P09651	HNRNPA1	Heterogeneous nuclear ribonucleoprotein A1, hnRNP A1, Helix-destabilizing protein, Single-strand RNA-binding protein, hnRNP core protein A1	30	6.03306	Yes		P22626	P22626	HNRNPA2B1	Heterogeneous nuclear ribonucleoproteins A2/B1, hnRNP A2/B1	51	3.35083e+10	3.51417e+10	3.33581e+10		Q92879	Q92879	CELF1	CUGBP Elav-like family member 1, CELF-1, 50 kDa nuclear polyadenylated RNA-binding protein, Bruno-like protein 2, CUG triplet repeat RNA-binding protein 1, CUG-BP1, CUG-BP- and ETR-3-like factor 1, Deadenylation factor CUG-BP, Embryo deadenylation element-binding protein homolog, EDEN-BP homolog, RNA-binding protein BRUNOL-2	43	5.82695e+10
Q7Z2W4	Q7Z2W4	ZC3HAV1	Zinc finger CCCH-type antiviral protein 1, ADP-ribosyltransferase diphtheria toxin-like 13, ARTD13, Inactive Poly [ADP-ribose] polymerase 13, PARP13, Zinc finger CCCH domain-containing protein 2, Zinc finger antiviral protein, ZAP	3.1889	0.158816	0.158505	0.169035	0.143121	0.142841	0.152331	0.031606	0.0278101	0.0276051	0.00187775	0.00182408	0.00196812	5.94112	6.55906	7.12954	6.54324	0.594367	0.815793					P31942	P31942	HNRNPH3	Heterogeneous nuclear ribonucleoprotein H3, hnRNP H3, Heterogeneous nuclear ribonucleoprotein 2H9, hnRNP 2H9	30	4.89664	Yes		O00410	O00410	IPO5	Importin-5, Imp5, Importin subunit beta-3, Karyopherin beta-3, Ran-binding protein 5, RanBP5	51	5.21284e+09	3.61523e+09	4.57571e+09		Q8NC51	Q8NC51	SERBP1	Plasminogen activator inhibitor 1 RNA-binding protein, PAI1 RNA-binding protein 1, PAI-RBP1, SERPINE1 mRNA-binding protein 1	43	6.16847e+10
Q9Y4C8	Q9Y4C8	RBM19	Probable RNA-binding protein 19, RNA-binding motif protein 19	4.32762	0.152272	0.144716	0.15193	0.145048	0.137851	0.144723	0.0350769	0.0323573	0.0214184	0.00190304	0.00176035	0.00186982	5.42533	5.44036	8.72996	6.53188	1.9036	0.815038					Q9BZE4	Q9BZE4	GTPBP4	GTP-binding protein 4, Chronic renal failure gene protein, GTP-binding protein NGB, Nucleolar GTP-binding protein 1	30	4.54202	Yes		P26038	P26038	MSN	Moesin, Membrane-organizing extension spike protein	51	1.59096e+10	1.34336e+10	1.61245e+10		Q13823	Q13823	GNL2	Nucleolar GTP-binding protein 2, Autoantigen NGP-1	43	4.0673e+09
Q9NW64	Q9NW64	RBM22	Pre-mRNA-splicing factor RBM22, RNA-binding motif protein 22, Zinc finger CCCH domain-containing protein 16	4.09403	0.0342434	0.0368012	0.0327138	0.0323491	0.0347654	0.0309042	0.00702919	0.00661392	0.00587009	0.00042442	0.000443954	0.000399282	6.03797	6.71243	6.80196	6.51745	0.417654	0.814078					Q9BUJ2	Q9BUJ2	HNRNPUL1	Heterogeneous nuclear ribonucleoprotein U-like protein 1, Adenovirus early region 1B-associated protein 5, E1B-55 kDa-associated protein 5, E1B-AP5	30	4.24106	Yes		P55265	P55265	ADAR	Double-stranded RNA-specific adenosine deaminase, DRADA, 3.5.4.37, 136 kDa double-stranded RNA-binding protein, p136, Interferon-inducible protein 4, IFI-4, K88DSRBP	51	2.11451e+09	1.82753e+09	1.88955e+09		Q9BVJ6	Q9BVJ6	UTP14A	U3 small nucleolar RNA-associated protein 14 homolog A, Antigen NY-CO-16, Serologically defined colon cancer antigen 16	43	2.85357e+09
Q96E39	Q96E39	RBMXL1	RNA binding motif protein, X-linked-like-1, Heterogeneous nuclear ribonucleoprotein G-like 1	4.52083	0.0212458	0.0207174	0.0217501	0.0203589	0.0198526	0.0208422	0.00419215	0.0046928	0.00349361	0.000267109	0.000253518	0.000269281	6.37166	5.40227	7.7078	6.49391	1.15762	0.812506					Q96GQ7	Q96GQ7	DDX27	Probable ATP-dependent RNA helicase DDX27, 3.6.4.13, DEAD box protein 27	30	3.46508	Yes		P48643	P48643	CCT5	T-complex protein 1 subunit epsilon, TCP-1-epsilon, CCT-epsilon	51	1.18515e+10	7.67527e+09	1.03427e+10		Q96GQ7	Q96GQ7	DDX27	Probable ATP-dependent RNA helicase DDX27, 3.6.4.13, DEAD box protein 27	43	3.24059e+09
O43251	O43251	RBFOX2	RNA binding protein fox-1 homolog 2, Fox-1 homolog B, Hexaribonucleotide-binding protein 2, RNA-binding motif protein 9, RNA-binding protein 9, Repressor of tamoxifen transcriptional activity	3.98059	0.0227668	0.0224481	0.0266168	0.0214105	0.0211108	0.0250311	0.00462258	0.00434011	0.00455743	0.000280906	0.000269586	0.000323402	6.07682	6.21148	7.09615	6.46149	0.553742	0.810332					Q8NE71	Q8NE71	ABCF1	ATP-binding cassette sub-family F member 1, ATP-binding cassette 50, TNF-alpha-stimulated ABC protein	30	3.19298	Yes		Q02790	Q02790	FKBP4	Peptidyl-prolyl cis-trans isomerase FKBP4, PPIase FKBP4, 5.2.1.8, 51 kDa FK506-binding protein, FKBP51, 52 kDa FK506-binding protein, 52 kDa FKBP, FKBP-52, 59 kDa immunophilin, p59, FK506-binding protein 4, FKBP-4, FKBP59, HSP-binding immunophilin, HBI, Immunophilin FKBP52, Rotamase	51	8.5339e+09	6.23312e+09	7.21484e+09		O75153	O75153	CLUH	Clustered mitochondria protein homolog	43	2.11333e+09
P98175	P98175	RBM10	RNA-binding protein 10, G patch domain-containing protein 9, RNA-binding motif protein 10, RNA-binding protein S1-1, S1-1	3.2785	0.0402306	0.0414959	0.0434645	0.0364719	0.0376191	0.0394037	0.00726897	0.00799948	0.00779089	0.000478512	0.000480395	0.000509096	6.58294	6.00533	6.5345	6.37426	0.320414	0.80443					Q9H6S0	Q9H6S0	YTHDC2	3'-5' RNA helicase YTHDC2, 3.6.4.13, YTH domain-containing protein 2, hYTHDC2	30	2.44984	Yes		P17844	P17844	DDX5	Probable ATP-dependent RNA helicase DDX5, 3.6.4.13, DEAD box protein 5, RNA helicase p68	51	1.07989e+10	8.88867e+09	1.01535e+10		O43143	O43143	DHX15	ATP-dependent RNA helicase DHX15, 3.6.4.13, ATP-dependent RNA helicase #46, DEAH box protein 15, Splicing factor Prp43, hPrp43	43	1.78653e+09
Q5T653	Q5T653	MRPL2	39S ribosomal protein L2, mitochondrial, L2mt, MRP-L2, Mitochondrial large ribosomal subunit protein uL2m	3.64087	0.0172002	0.0177896	0.0158045	0.0159237	0.0164693	0.0146315	0.00256391	0.00379052	0.00348531	0.000208919	0.000210313	0.00018904	8.14847	5.5484	5.42389	6.37359	1.53835	0.804384					Q04637	Q04637	EIF4G1	Eukaryotic translation initiation factor 4 gamma 1, eIF-4-gamma 1, eIF-4G 1, eIF-4G1, p220	30	2.00479	Yes		P11940	P11940	PABPC1	Polyadenylate-binding protein 1, PABP-1, Poly(A)-binding protein 1	50	1.31607e+10	1.23292e+10	1.25977e+10		Q9UQ35	Q9UQ35	SRRM2	Serine/arginine repetitive matrix protein 2, 300 kDa nuclear matrix antigen, Serine/arginine-rich splicing factor-related nuclear matrix protein of 300 kDa, SR-related nuclear matrix protein of 300 kDa, Ser/Arg-related nuclear matrix protein of 300 kDa, Splicing coactivator subunit SRm300, Tax-responsive enhancer element-binding protein 803, TaxREB803	43	3.5981e+09
Q8NCA5	Q8NCA5	FAM98A	Protein FAM98A	3.76823	0.0154764	0.0136621	0.0141415	0.0144182	0.0127279	0.0131746	0.00221835	0.00267843	0.00397284	0.000189166	0.000162536	0.000170216	8.52733	6.06832	4.28448	6.29338	2.13036	0.798884					Q96T37	Q96T37	RBM15	RNA-binding protein 15, One-twenty two protein 1, RNA-binding motif protein 15	30	1.98141	Yes		O75691	O75691	UTP20	Small subunit processome component 20 homolog, Down-regulated in metastasis protein, Novel nucleolar protein 73, NNP73, Protein Key-1A6	50	1.53052e+09	1.5558e+09	1.4041e+09		Q8IWA0	Q8IWA0	WDR75	WD repeat-containing protein 75, U3 small nucleolar RNA-associated protein 17 homolog	42	5.48324e+09
Q9NS39	Q9NS39	ADARB2	Double-stranded RNA-specific editase B2, 3.5.-.-, RNA-dependent adenosine deaminase 3, RNA-editing deaminase 2, RNA-editing enzyme 2, dsRNA adenosine deaminase B2	3.17593	0.000247611	0.000280415	0.000268538	0.000222943	0.000252479	0.000241785	3.66716e-05	6.1156e-05	5.55493e-05	2.92501e-06	3.22415e-06	3.12386e-06	7.97622	5.27201	5.62359	6.2906	1.47033	0.798692					Q14103	Q14103	HNRNPD	Heterogeneous nuclear ribonucleoprotein D0, hnRNP D0, AU-rich element RNA-binding protein 1	29	4.64119	Yes		P78371	P78371	CCT2	T-complex protein 1 subunit beta, TCP-1-beta, CCT-beta	50	1.02119e+10	6.30388e+09	8.21439e+09		Q15397	Q15397	PUM3	Pumilio homolog 3, HBV X-transactivated gene 5 protein, HBV XAg-transactivated protein 5, Minor histocompatibility antigen HA-8, HLA-HA8	42	1.59108e+09
Q9NUL3	Q9NUL3	STAU2	Double-stranded RNA-binding protein Staufen homolog 2	3.13948	0.0119457	0.0121258	0.0109303	0.0107282	0.01089	0.00981629	0.00262957	0.00196051	0.00197919	0.000140755	0.000139065	0.000126826	5.35277	7.0933	6.408	6.28469	0.876794	0.798284					Q13823	Q13823	GNL2	Nucleolar GTP-binding protein 2, Autoantigen NGP-1	29	4.32914	Yes		P13010	P13010	XRCC5	X-ray repair cross-complementing protein 5, 3.6.4.-, 86 kDa subunit of Ku antigen, ATP-dependent DNA helicase 2 subunit 2, ATP-dependent DNA helicase II 80 kDa subunit, CTC box-binding factor 85 kDa subunit, CTC85, CTCBF, DNA repair protein XRCC5, Ku80, Ku86, Lupus Ku autoantigen protein p86, Nuclear factor IV, Thyroid-lupus autoantigen, TLAA, X-ray repair complementing defective repair in Chines…	49	5.56611e+09	4.6188e+09	5.45408e+09		Q9BUJ2	Q9BUJ2	HNRNPUL1	Heterogeneous nuclear ribonucleoprotein U-like protein 1, Adenovirus early region 1B-associated protein 5, E1B-55 kDa-associated protein 5, E1B-AP5	42	5.69016e+09
Q5VYS8	Q5VYS8	TUT7	Terminal uridylyltransferase 7, TUTase 7, 2.7.7.52, Zinc finger CCHC domain-containing protein 6	3.80024	0.0097829	0.00788741	0.00866493	0.00912769	0.00735916	0.0080846	0.00162292	0.00167947	0.00177813	0.000119755	9.39764e-05	0.000104453	7.37902	5.5956	5.87432	6.28298	0.959372	0.798166					P23396	P23396	RPS3	40S ribosomal protein S3, 4.2.99.18, Small ribosomal subunit protein uS3	29	4.15361	Yes		K7EJE8	K7EJE8	LONP1	Lon protease homolog, mitochondrial, 3.4.21.53, Lon protease-like protein, LONP, Mitochondrial ATP-dependent protease Lon, Serine protease 15	49	3.10057e+09	2.13101e+09	2.79409e+09		O75533	O75533	SF3B1	Splicing factor 3B subunit 1, Pre-mRNA-splicing factor SF3b 155 kDa subunit, SF3b155, Spliceosome-associated protein 155, SAP 155	42	1.42268e+09
P26368	P26368	U2AF2	Splicing factor U2AF 65 kDa subunit, U2 auxiliary factor 65 kDa subunit, hU2AF(65), hU2AF65, U2 snRNP auxiliary factor large subunit	3.75359	0.167902	0.169147	0.144725	0.156313	0.157472	0.134736	0.0263116	0.0369689	0.0312986	0.00205083	0.00201091	0.00174079	7.79439	5.43946	5.56188	6.26525	1.32569	0.796938					Q14684	Q14684	RRP1B	Ribosomal RNA processing protein 1 homolog B, RRP1-like protein B	29	2.31209	Yes		P30101	P30101	PDIA3	Protein disulfide-isomerase A3, 5.3.4.1, 58 kDa glucose-regulated protein, 58 kDa microsomal protein, p58, Disulfide isomerase ER-60, Endoplasmic reticulum resident protein 57, ER protein 57, ERp57, Endoplasmic reticulum resident protein 60, ER protein 60, ERp60	49	1.53449e+10	1.16207e+10	1.34876e+10		Q5BKZ1	Q5BKZ1	ZNF326	DBIRD complex subunit ZNF326, Zinc finger protein 326, Zinc finger protein interacting with mRNPs and DBC1	41	3.72684e+09
Q9NY93	Q9NY93	DDX56	Probable ATP-dependent RNA helicase DDX56, 3.6.4.13, ATP-dependent 61 kDa nucleolar RNA helicase, DEAD box protein 21, DEAD box protein 56	4.64671	0.0376472	0.035576	0.0341515	0.036202	0.0342103	0.0328404	0.00800252	0.0066978	0.00703653	0.00047497	0.000436865	0.000424298	5.93526	6.52251	6.02993	6.16257	0.315296	0.789762					Q15058	Q15058	KIF14	Kinesin-like protein KIF14	29	-0.129068	Yes		P22314	P22314	UBA1	Ubiquitin-like modifier-activating enzyme 1, 6.2.1.45, Protein A1S9, Ubiquitin-activating enzyme E1	49	5.73456e+09	3.39493e+09	4.37228e+09		Q8NE71	Q8NE71	ABCF1	ATP-binding cassette sub-family F member 1, ATP-binding cassette 50, TNF-alpha-stimulated ABC protein	41	3.01304e+09
Q96AE4	Q96AE4	FUBP1	Far upstream element-binding protein 1, FBP, FUSE-binding protein 1, DNA helicase V, hDH V	4.64642	0.29964	0.302466	0.300108	0.288135	0.290853	0.288585	0.0634224	0.0523577	0.0703222	0.00378033	0.00371419	0.00372852	5.96055	7.09387	5.30205	6.11882	0.906333	0.786668					Q8NC51	Q8NC51	SERBP1	Plasminogen activator inhibitor 1 RNA-binding protein, PAI1 RNA-binding protein 1, PAI-RBP1, SERPINE1 mRNA-binding protein 1	28	4.77313	Yes		P20700	P20700	LMNB1	Lamin-B1	49	4.86548e+09	3.27775e+09	3.95854e+09		P09874	P09874	PARP1	Poly [ADP-ribose] polymerase, 2.4.2.30	41	9.84904e+08
Q96EU6	Q96EU6	RRP36	Ribosomal RNA processing protein 36 homolog	10	0.0103417	0.0103929	0.00906877	0.0103316	0.0103828	0.00905992	0.00219606	0.00199781	0.00216673	0.00013555	0.000132588	0.000117054	6.17243	6.63665	5.40233	6.07047	0.623444	0.783223					Q8TED0	Q8TED0	UTP15	U3 small nucleolar RNA-associated protein 15 homolog	28	4.33167	Yes		P35573	P35573	AGL	Glycogen debranching enzyme, Glycogen debrancher, 4-alpha-glucanotransferase, 2.4.1.25, Oligo-1,4-1,4-glucantransferase, Amylo-alpha-1,6-glucosidase, Amylo-1,6-glucosidase, 3.2.1.33, Dextrin 6-alpha-D-glucosidase	48	1.74803e+09	1.3808e+09	1.48752e+09		Q14671	Q14671	PUM1	Pumilio homolog 1, HsPUM, Pumilio-1	40	7.99288e+09
Q6NZY4	Q6NZY4	ZCCHC8	Zinc finger CCHC domain-containing protein 8, TRAMP-like complex RNA-binding factor ZCCHC8	3.73936	0.0016101	0.00166927	0.00273633	0.00149794	0.00155298	0.00254571	0.0004281	0.000315483	0.000455343	1.9653e-05	1.98316e-05	3.28906e-05	4.59074	6.28612	7.22326	6.03337	1.33433	0.78056					P39023	P39023	RPL3	60S ribosomal protein L3, HIV-1 TAR RNA-binding protein B, TARBP-B, Large ribosomal subunit protein uL3	28	4.05691	Yes		P50991	P50991	CCT4	T-complex protein 1 subunit delta, TCP-1-delta, CCT-delta, Stimulator of TAR RNA-binding	48	1.01034e+10	7.44653e+09	1.00188e+10		P26599	P26599	PTBP1	Polypyrimidine tract-binding protein 1, PTB, 57 kDa RNA-binding protein PPTB-1, Heterogeneous nuclear ribonucleoprotein I, hnRNP I	40	1.27425e+11
Q7KZF4	Q7KZF4	SND1	Staphylococcal nuclease domain-containing protein 1, 3.1.31.1, 100 kDa coactivator, EBNA2 coactivator p100, Tudor domain-containing protein 11, p100 co-activator	4.08695	0.617432	0.604351	0.55267	0.583119	0.570765	0.521956	0.129089	0.106659	0.12643	0.00765052	0.00728867	0.00674367	5.92656	6.83363	5.33392	6.03137	0.755325	0.780416					P46087	P46087	NOP2	Probable 28S rRNA (cytosine(4447)-C(5))-methyltransferase, 2.1.1.-, Nucleolar protein 1, Nucleolar protein 2 homolog, Proliferating-cell nucleolar antigen p120, Proliferation-associated nucleolar protein p120	28	3.37346	Yes		P12956	P12956	XRCC6	X-ray repair cross-complementing protein 6, 3.6.4.-, 4.2.99.-, 5'-deoxyribose-5-phosphate lyase Ku70, 5'-dRP lyase Ku70, 70 kDa subunit of Ku antigen, ATP-dependent DNA helicase 2 subunit 1, ATP-dependent DNA helicase II 70 kDa subunit, CTC box-binding factor 75 kDa subunit, CTC75, CTCBF, DNA repair protein XRCC6, Lupus Ku autoantigen protein p70, Ku70, Thyroid-lupus autoantigen, TLAA, X-ray repa…	48	5.14495e+09	4.33429e+09	5.35927e+09		Q92841	Q92841	DDX17	Probable ATP-dependent RNA helicase DDX17, 3.6.4.13, DEAD box protein 17, DEAD box protein p72, DEAD box protein p82, RNA-dependent helicase p72	40	8.52286e+09
P09651	P09651	HNRNPA1	Heterogeneous nuclear ribonucleoprotein A1, hnRNP A1, Helix-destabilizing protein, Single-strand RNA-binding protein, hnRNP core protein A1	6.03306	3.352	3.26865	3.35337	3.30158	3.21949	3.30293	0.600005	0.820577	0.728858	0.0433167	0.0411129	0.0426738	7.21939	5.01024	5.85489	6.02817	1.11472	0.780186					P98175	P98175	RBM10	RNA-binding protein 10, G patch domain-containing protein 9, RNA-binding motif protein 10, RNA-binding protein S1-1, S1-1	28	3.2785	Yes		Q9HCE1	Q9HCE1	MOV10	Helicase MOV-10, 3.6.4.13, Armitage homolog, Moloney leukemia virus 10 protein	48	1.40057e+09	1.48982e+09	1.4956e+09		P24928	P24928	POLR2A	DNA-directed RNA polymerase II subunit RPB1, RNA polymerase II subunit B1, 2.7.7.6, DNA-directed RNA polymerase II subunit A, DNA-directed RNA polymerase III largest subunit, RNA-directed RNA polymerase II subunit RPB1, 2.7.7.48	40	1.52948e+09
P43243	P43243	MATR3	Matrin-3	3.92492	0.54922	0.535569	0.56385	0.515293	0.502485	0.52902	0.11493	0.108046	0.113947	0.00676065	0.00641674	0.00683494	5.88239	5.93892	5.99833	5.93988	0.0579752	0.773778					P34897	P34897	SHMT2	Serine hydroxymethyltransferase, mitochondrial, SHMT, 2.1.2.1, Glycine hydroxymethyltransferase, Serine methylase	28	-0.0586842	Yes		Q6PKG0	Q6PKG0	LARP1	La-related protein 1, La ribonucleoprotein domain family member 1	48	1.59199e+09	1.26664e+09	1.47381e+09		O15042	O15042	U2SURP	U2 snRNP-associated SURP motif-containing protein, 140 kDa Ser/Arg-rich domain protein, U2-associated protein SR140	40	2.82604e+09
Q00839	Q00839	HNRNPU	Heterogeneous nuclear ribonucleoprotein U, hnRNP U, GRIP120, Nuclear p120 ribonucleoprotein, Scaffold-attachment factor A, SAF-A, p120, pp120	4.48869	1.8714	1.76099	1.6868	1.7916	1.6859	1.61487	0.363623	0.411366	0.355693	0.0235058	0.0215289	0.0208642	6.46432	5.23352	5.86579	5.85454	0.615475	0.767493					Q13283	Q13283	G3BP1	Ras GTPase-activating protein-binding protein 1, G3BP-1, 3.6.4.12, 3.6.4.13, ATP-dependent DNA helicase VIII, hDH VIII, GAP SH3 domain-binding protein 1	27	5.07124	Yes		P55060	P55060	CSE1L	Exportin-2, Exp2, Cellular apoptosis susceptibility protein, Chromosome segregation 1-like protein, Importin-alpha re-exporter	47	4.46745e+09	3.75982e+09	3.7408e+09		P08621	P08621	SNRNP70	U1 small nuclear ribonucleoprotein 70 kDa, U1 snRNP 70 kDa, U1-70K, snRNP70	39	5.52134e+09
Q8ND56	Q8ND56	LSM14A	Protein LSM14 homolog A, Protein FAM61A, Protein SCD6 homolog, Putative alpha-synuclein-binding protein, AlphaSNBP, RNA-associated protein 55A, hRAP55, hRAP55A	4.62675	0.0131305	0.0126108	0.014157	0.0126197	0.0121202	0.0136063	0.00301357	0.0030683	0.0025301	0.000165571	0.000154775	0.000175793	5.49418	5.04432	6.94807	5.82886	0.995028	0.765583					O15371	O15371	EIF3D	Eukaryotic translation initiation factor 3 subunit D, eIF3d, Eukaryotic translation initiation factor 3 subunit 7, eIF-3-zeta, eIF3 p66	27	4.71527	Yes		P00966	P00966	ASS1	Argininosuccinate synthase, 6.3.4.5, Citrulline--aspartate ligase	47	1.28185e+10	9.80537e+09	1.23614e+10		P78344	P78344	EIF4G2	Eukaryotic translation initiation factor 4 gamma 2, eIF-4-gamma 2, eIF-4G 2, eIF4G 2, Death-associated protein 5, DAP-5, p97	39	1.0712e+09
P62841	P62841	RPS15	40S ribosomal protein S15, RIG protein, Small ribosomal subunit protein uS19	5.04989	0.47541	0.457114	0.428605	0.461479	0.443719	0.416046	0.0747134	0.128898	0.113766	0.0060546	0.0056663	0.00537531	8.10377	4.39594	4.72489	5.74154	2.05235	0.759028					Q13310	Q13310	PABPC4	Polyadenylate-binding protein 4, PABP-4, Poly(A)-binding protein 4, Activated-platelet protein 1, APP-1, Inducible poly(A)-binding protein, iPABP	27	4.55271	Yes		Q5JTH9	Q5JTH9	RRP12	RRP12-like protein	47	1.60355e+09	1.8368e+09	1.66491e+09		P12956	P12956	XRCC6	X-ray repair cross-complementing protein 6, 3.6.4.-, 4.2.99.-, 5'-deoxyribose-5-phosphate lyase Ku70, 5'-dRP lyase Ku70, 70 kDa subunit of Ku antigen, ATP-dependent DNA helicase 2 subunit 1, ATP-dependent DNA helicase II 70 kDa subunit, CTC box-binding factor 75 kDa subunit, CTC75, CTCBF, DNA repair protein XRCC6, Lupus Ku autoantigen protein p70, Ku70, Thyroid-lupus autoantigen, TLAA, X-ray repa…	39	2.59581e+09
Q14103	Q14103	HNRNPD	Heterogeneous nuclear ribonucleoprotein D0, hnRNP D0, AU-rich element RNA-binding protein 1	4.64119	0.408488	0.417371	0.500365	0.392749	0.401289	0.481086	0.106039	0.114133	0.0802441	0.00515286	0.00512446	0.00621563	4.85942	4.48989	7.74591	5.69841	1.78279	0.755754					Q9UGR2	Q9UGR2	ZC3H7B	Zinc finger CCCH domain-containing protein 7B, Rotavirus 'X'-associated non-structural protein, RoXaN	27	4.41682	Yes		P36871	P36871	PGM1	Phosphoglucomutase-1, PGM 1, 5.4.2.2, Glucose phosphomutase 1	47	6.33723e+09	5.87541e+09	5.63293e+09		P31942	P31942	HNRNPH3	Heterogeneous nuclear ribonucleoprotein H3, hnRNP H3, Heterogeneous nuclear ribonucleoprotein 2H9, hnRNP 2H9	38	2.19522e+10
Q9NW13	Q9NW13	RBM28	RNA-binding protein 28, RNA-binding motif protein 28	3.23813	0.115394	0.110859	0.111793	0.104336	0.100236	0.101081	0.0227728	0.0261115	0.0213229	0.00136889	0.00128002	0.00130596	6.0111	4.90212	6.12468	5.6793	0.675449	0.754295					Q8IX01	Q8IX01	SUGP2	SURP and G-patch domain-containing protein 2, Arginine/serine-rich-splicing factor 14, Splicing factor, arginine/serine-rich 14	27	4.34828	Yes		P15880	P15880	RPS2	40S ribosomal protein S2, 40S ribosomal protein S4, Protein LLRep3, Small ribosomal subunit protein uS5	46	1.54754e+10	2.11682e+10	1.90482e+10		Q99729	Q99729	HNRNPAB	Heterogeneous nuclear ribonucleoprotein A/B, hnRNP A/B, APOBEC1-binding protein 1, ABBP-1	38	1.7927e+10
P51991	P51991	HNRNPA3	Heterogeneous nuclear ribonucleoprotein A3, hnRNP A3	6.10006	0.690451	0.650879	0.716216	0.68053	0.641527	0.705925	0.136983	0.207666	0.142208	0.00892856	0.0081923	0.00912055	6.51803	3.94493	6.41353	5.6255	1.45635	0.750161					Q5BKZ1	Q5BKZ1	ZNF326	DBIRD complex subunit ZNF326, Zinc finger protein 326, Zinc finger protein interacting with mRNPs and DBC1	27	4.05162	Yes		O60506	O60506	SYNCRIP	Heterogeneous nuclear ribonucleoprotein Q, hnRNP Q, Glycine- and tyrosine-rich RNA-binding protein, GRY-RBP, NS1-associated protein 1, Synaptotagmin-binding, cytoplasmic RNA-interacting protein	46	6.49413e+09	9.6252e+09	7.97895e+09		P62280	P62280	RPS11	40S ribosomal protein S11, Small ribosomal subunit protein uS17	38	3.00742e+10
Q02543	Q02543	RPL18A	60S ribosomal protein L18a, Large ribosomal subunit protein eL20	4.66155	0.665329	0.486364	0.563489	0.640039	0.467877	0.542071	0.111609	0.140729	0.141567	0.00839731	0.0059748	0.00700355	7.52387	4.2456	4.94717	5.57221	1.7262	0.746028					Q1KMD3	Q1KMD3	HNRNPUL2	Heterogeneous nuclear ribonucleoprotein U-like protein 2, Scaffold-attachment factor A2, SAF-A2	27	3.53057	Yes		Q92598	Q92598	HSPH1	Heat shock protein 105 kDa, Antigen NY-CO-25, Heat shock 110 kDa protein	46	3.23605e+09	2.87169e+09	3.25623e+09		O60841	O60841	EIF5B	Eukaryotic translation initiation factor 5B, eIF-5B, 3.6.5.3, Translation initiation factor IF-2	38	1.68161e+09
Q86W50	Q86W50	METTL16	RNA N6-adenosine-methyltransferase METTL16, Methyltransferase 10 domain-containing protein, Methyltransferase-like protein 16, N6-adenosine-methyltransferase METTL16, 2.1.1.348, U6 small nuclear RNA (adenine-(43)-N(6))-methyltransferase, 2.1.1.346	4.72125	0.009081	0.00851379	0.00947104	0.0087493	0.00820281	0.0091251	0.00278368	0.00186681	0.00169284	0.000114791	0.00010475	0.000117896	4.12371	5.61116	6.9644	5.56642	1.42087	0.745576					O15042	O15042	U2SURP	U2 snRNP-associated SURP motif-containing protein, 140 kDa Ser/Arg-rich domain protein, U2-associated protein SR140	27	2.99536	Yes		Q9BZE4	Q9BZE4	GTPBP4	GTP-binding protein 4, Chronic renal failure gene protein, GTP-binding protein NGB, Nucleolar GTP-binding protein 1	46	2.75226e+09	2.94923e+09	2.90223e+09		Q14204	Q14204	DYNC1H1	Cytoplasmic dynein 1 heavy chain 1, Cytoplasmic dynein heavy chain 1, Dynein heavy chain, cytosolic	38	6.27288e+08
P49207	P49207	RPL34	60S ribosomal protein L34, Large ribosomal subunit protein eL34	5.38329	0.552808	0.490983	0.460494	0.539874	0.479494	0.449719	0.0985469	0.141908	0.117268	0.00708314	0.00612314	0.00581037	7.18759	4.31488	4.95479	5.48575	1.50816	0.739236					P23588	P23588	EIF4B	Eukaryotic translation initiation factor 4B, eIF-4B	27	2.44262	Yes		Q7Z2W4	Q7Z2W4	ZC3HAV1	Zinc finger CCCH-type antiviral protein 1, ADP-ribosyltransferase diphtheria toxin-like 13, ARTD13, Inactive Poly [ADP-ribose] polymerase 13, PARP13, Zinc finger CCCH domain-containing protein 2, Zinc finger antiviral protein, ZAP	46	1.84646e+09	1.62471e+09	1.61274e+09		P78332	P78332	RBM6	RNA-binding protein 6, Lung cancer antigen NY-LU-12, Protein G16, RNA-binding motif protein 6, RNA-binding protein DEF-3	37	1.32068e+09
Q96DH6	Q96DH6	MSI2	RNA-binding protein Musashi homolog 2, Musashi-2	1.69536	0.00506923	0.00561656	0.00572901	0.00387325	0.00429145	0.00437737	0.000591457	0.00136213	0.00152463	5.08171e-05	5.48018e-05	5.65556e-05	8.59184	4.02325	3.70947	5.44152	2.73277	0.73572					O60841	O60841	EIF5B	Eukaryotic translation initiation factor 5B, eIF-5B, 3.6.5.3, Translation initiation factor IF-2	27	1.1712	Yes		O60841	O60841	EIF5B	Eukaryotic translation initiation factor 5B, eIF-5B, 3.6.5.3, Translation initiation factor IF-2	46	2.92971e+09	2.74865e+09	2.35551e+09		Q9UGR2	Q9UGR2	ZC3H7B	Zinc finger CCCH domain-containing protein 7B, Rotavirus 'X'-associated non-structural protein, RoXaN	37	1.4437e+09
O95985	O95985	TOP3B	DNA topoisomerase 3-beta-1, 5.6.2.1, DNA topoisomerase III beta-1	3.26345	0.00886926	0.00826641	0.00772195	0.00803276	0.00748676	0.00699365	0.0024039	0.00143157	0.00171798	0.00010539	9.56059e-05	9.0358e-05	4.38411	6.6784	5.25954	5.44068	1.15782	0.735654					P18124	P18124	RPL7	60S ribosomal protein L7, Large ribosomal subunit protein uL30	26	4.64166	Yes		P11586	P11586	MTHFD1	C-1-tetrahydrofolate synthase, cytoplasmic, C1-THF synthase, Epididymis secretory sperm binding protein, Methylenetetrahydrofolate dehydrogenase, 1.5.1.5, Methenyltetrahydrofolate cyclohydrolase, 3.5.4.9, Formyltetrahydrofolate synthetase, 6.3.4.3	46	3.17515e+09	1.86739e+09	3.05992e+09		P98175	P98175	RBM10	RNA-binding protein 10, G patch domain-containing protein 9, RNA-binding motif protein 10, RNA-binding protein S1-1, S1-1	37	2.35043e+09
Q9UKA9	Q9UKA9	PTBP2	Polypyrimidine tract-binding protein 2, Neural polypyrimidine tract-binding protein, Neurally-enriched homolog of PTB, PTB-like protein	-0.642607	0.0190314	0.0183098	0.0158818	0.0074308	0.00714904	0.00620104	0.0017058	0.00126051	0.0024446	9.74922e-05	9.12933e-05	8.01175e-05	5.71533	7.24255	3.27732	5.41173	1.99997	0.733336					P55795	P55795	HNRNPH2	Heterogeneous nuclear ribonucleoprotein H2, hnRNP H2, FTP-3, Heterogeneous nuclear ribonucleoprotein H', hnRNP H'	26	4.41438	Yes		O95347	O95347	SMC2	Structural maintenance of chromosomes protein 2, SMC protein 2, SMC-2, Chromosome-associated protein E, hCAP-E, XCAP-E homolog	46	1.82496e+09	1.61775e+09	1.31561e+09		O00425	O00425	IGF2BP3	Insulin-like growth factor 2 mRNA-binding protein 3, IGF2 mRNA-binding protein 3, IMP-3, IGF-II mRNA-binding protein 3, KH domain-containing protein overexpressed in cancer, hKOC, VICKZ family member 3	37	4.65725e+09
Q9ULX6	Q9ULX6	AKAP8L	A-kinase anchor protein 8-like, AKAP8-like protein, Helicase A-binding protein 95, HAP95, Homologous to AKAP95 protein, HA95, Neighbor of A-kinase-anchoring protein 95, Neighbor of AKAP95	3.59964	0.00757692	0.00929082	0.00861066	0.00699953	0.00858282	0.00795449	0.00216893	0.00173966	0.00183027	9.18338e-05	0.000109603	0.000102772	4.23406	6.30022	5.61512	5.38313	1.05243	0.731035					Q92841	Q92841	DDX17	Probable ATP-dependent RNA helicase DDX17, 3.6.4.13, DEAD box protein 17, DEAD box protein p72, DEAD box protein p82, RNA-dependent helicase p72	26	4.3349	Yes		P0DMV8	P0DMV8	HSPA1A	Heat shock 70 kDa protein 1A, Heat shock 70 kDa protein 1, HSP70-1, HSP70.1	46	3.1383e+10	2.3904e+10	2.83956e+10		Q15424	Q15424	SAFB	Scaffold attachment factor B1, SAF-B, SAF-B1, HSP27 estrogen response element-TATA box-binding protein, HSP27 ERE-TATA-binding protein	37	2.92763e+09
O95900	O95900	TRUB2	Pseudouridylate synthase TRUB2, mitochondrial, 5.4.99.-, TruB pseudouridine synthase homolog 2, tRNA pseudouridine 55 synthase TRUB2, Psi55 synthase TRUB2, 5.4.99.25	2.78377	0.00332987	0.00287843	0.00280842	0.00290765	0.00251345	0.00245232	0.00090293	0.00048231	0.000619342	3.81483e-05	3.20968e-05	3.16839e-05	4.22495	6.6548	5.11574	5.33183	1.22925	0.726876					Q15365	Q15365	PCBP1	Poly(rC)-binding protein 1, Alpha-CP1, Heterogeneous nuclear ribonucleoprotein E1, hnRNP E1, Nucleic acid-binding protein SUB2.3	26	4.22259	Yes		Q15393	Q15393	SF3B3	Splicing factor 3B subunit 3, Pre-mRNA-splicing factor SF3b 130 kDa subunit, SF3b130, STAF130, Spliceosome-associated protein 130, SAP 130	46	4.07997e+09	4.24011e+09	3.14639e+09		O14979	O14979	HNRNPDL	Heterogeneous nuclear ribonucleoprotein D-like, hnRNP D-like, hnRNP DL, AU-rich element RNA-binding factor, JKT41-binding protein, Protein laAUF1	36	8.92203e+09
Q9NV06	Q9NV06	DCAF13	DDB1- and CUL4-associated factor 13, WD repeat and SOF domain-containing protein 1	4.95111	0.0258533	0.0225339	0.022799	0.0250437	0.0218283	0.0220851	0.00567202	0.0053105	0.00592794	0.000328574	0.000278747	0.000285339	5.79288	5.24898	4.81347	5.28511	0.490705	0.723054					P26368	P26368	U2AF2	Splicing factor U2AF 65 kDa subunit, U2 auxiliary factor 65 kDa subunit, hU2AF(65), hU2AF65, U2 snRNP auxiliary factor large subunit	26	3.75359	Yes		Q9UQE7	Q9UQE7	SMC3	Structural maintenance of chromosomes protein 3, SMC protein 3, SMC-3, Basement membrane-associated chondroitin proteoglycan, Bamacan, Chondroitin sulfate proteoglycan 6, Chromosome-associated polypeptide, hCAP	46	1.51303e+09	1.34087e+09	1.22343e+09		Q14444	Q14444	CAPRIN1	Caprin-1, Cell cycle-associated protein 1, Cytoplasmic activation- and proliferation-associated protein 1, GPI-anchored membrane protein 1, GPI-anchored protein p137, GPI-p137, p137GPI, Membrane component chromosome 11 surface marker 1, RNA granule protein 105	36	7.28583e+09
Q96PU8	Q96PU8	QKI	KH domain-containing RNA-binding protein QKI, Protein quaking, Hqk, HqkI	6.21284	0.00132789	0.00216698	0.00156125	0.00131022	0.00213815	0.00154049	0.00110689	0.000277168	0.00045497	1.71901e-05	2.73042e-05	1.99031e-05	1.55301	9.85113	4.37459	5.25958	4.21925	0.720951					Q9NVN8	Q9NVN8	GNL3L	Guanine nucleotide-binding protein-like 3-like protein	26	3.70521	Yes		O43390	O43390	HNRNPR	Heterogeneous nuclear ribonucleoprotein R, hnRNP R	45	4.77688e+09	5.85752e+09	4.79296e+09		Q14258	Q14258	TRIM25	E3 ubiquitin/ISG15 ligase TRIM25, 6.3.2.n3, Estrogen-responsive finger protein, RING finger protein 147, RING-type E3 ubiquitin transferase, 2.3.2.27, RING-type E3 ubiquitin transferase TRIM25, Tripartite motif-containing protein 25, Ubiquitin/ISG15-conjugating enzyme TRIM25, Zinc finger protein 147	36	2.07483e+09
O14578	O14578	CIT	Citron Rho-interacting kinase, CRIK, 2.7.11.1, Serine/threonine-protein kinase 21	1.05411	0.00112547	0.000889999	0.00119987	0.000759636	0.000600704	0.000809852	0.000224054	0.00013486	0.000187314	9.96643e-06	7.67099e-06	1.04633e-05	4.44823	5.68811	5.58595	5.24077	0.688251	0.719395					Q8IWR0	Q8IWR0	ZC3H7A	Zinc finger CCCH domain-containing protein 7A	26	3.70133	Yes		Q92945	Q92945	KHSRP	Far upstream element-binding protein 2, FUSE-binding protein 2, KH type-splicing regulatory protein, KSRP, p75	45	3.33605e+09	4.09128e+09	4.71774e+09		Q8TEQ6	Q8TEQ6	GEMIN5	Gem-associated protein 5, Gemin5	36	8.3465e+08
Q8TED0	Q8TED0	UTP15	U3 small nucleolar RNA-associated protein 15 homolog	4.33167	0.0539693	0.0455656	0.0453044	0.0514158	0.0434097	0.0431608	0.0109053	0.0144086	0.00989394	0.000674575	0.000554342	0.000557638	6.18578	3.84729	5.63616	5.22308	1.22275	0.717926					F8WD15	O00425	IGF2BP3	Insulin-like growth factor 2 mRNA-binding protein 3, IGF2 mRNA-binding protein 3, IMP-3, IGF-II mRNA-binding protein 3, KH domain-containing protein overexpressed in cancer, hKOC, VICKZ family member 3	26	3.16005	Yes		O43143	O43143	DHX15	ATP-dependent RNA helicase DHX15, 3.6.4.13, ATP-dependent RNA helicase #46, DEAH box protein 15, Splicing factor Prp43, hPrp43	45	3.67891e+09	3.18654e+09	3.7096e+09		O00411	O00411	POLRMT	DNA-directed RNA polymerase, mitochondrial, MtRPOL, 2.7.7.6	36	1.40175e+09
P62847	P62847	RPS24	40S ribosomal protein S24, Small ribosomal subunit protein eS24	4.12677	0.198198	0.19393	0.18031	0.187467	0.18343	0.170547	0.0405984	0.0401316	0.0593857	0.00245957	0.0023424	0.00220347	6.0583	5.8368	3.71044	5.20185	1.29633	0.716157					Q9P275	Q9P275	USP36	Ubiquitin carboxyl-terminal hydrolase 36, 3.4.19.12, Deubiquitinating enzyme 36, Ubiquitin thioesterase 36, Ubiquitin-specific-processing protease 36	26	3.01893	Yes		Q99575	Q99575	POP1	Ribonucleases P/MRP protein subunit POP1, hPOP1	45	1.51451e+09	1.62757e+09	1.45899e+09		Q9P275	Q9P275	USP36	Ubiquitin carboxyl-terminal hydrolase 36, 3.4.19.12, Deubiquitinating enzyme 36, Ubiquitin thioesterase 36, Ubiquitin-specific-processing protease 36	35	1.11948e+09
Q9NY12	Q9NY12	GAR1	H/ACA ribonucleoprotein complex subunit 1, Nucleolar protein family A member 1, snoRNP protein GAR1	4.36921	0.0215718	0.0225247	0.0189514	0.0205762	0.0214851	0.0180767	0.00585184	0.00473337	0.00514494	0.000269959	0.000274365	0.000233551	4.61324	5.7964	4.53944	4.98303	0.705366	0.697493					Q9HAV4	Q9HAV4	XPO5	Exportin-5, Exp5, Ran-binding protein 21	26	2.2987	Yes		P78344	P78344	EIF4G2	Eukaryotic translation initiation factor 4 gamma 2, eIF-4-gamma 2, eIF-4G 2, eIF4G 2, Death-associated protein 5, DAP-5, p97	45	2.39686e+09	1.61235e+09	2.10166e+09		Q14684	Q14684	RRP1B	Ribosomal RNA processing protein 1 homolog B, RRP1-like protein B	35	1.44877e+09
Q9BUL9	Q9BUL9	RPP25	Ribonuclease P protein subunit p25, RNase P protein subunit p25	3.94865	0.00271739	0.00274832	0.00281888	0.0025521	0.00258115	0.00264742	0.000779313	0.000523263	0.000788888	3.34836e-05	3.29613e-05	3.42047e-05	4.29655	6.29919	4.33581	4.97718	1.14506	0.696984					Q14157	Q14157	UBAP2L	Ubiquitin-associated protein 2-like, Protein NICE-4, RNA polymerase II degradation factor UBAP2L	26	1.44836	Yes		P13667	P13667	PDIA4	Protein disulfide-isomerase A4, 5.3.4.1, Endoplasmic reticulum resident protein 70, ER protein 70, ERp70, Endoplasmic reticulum resident protein 72, ER protein 72, ERp-72, ERp72	45	3.50609e+09	2.54444e+09	2.70667e+09		P30876	P30876	POLR2B	DNA-directed RNA polymerase II subunit RPB2, 2.7.7.6, DNA-directed RNA polymerase II 140 kDa polypeptide, DNA-directed RNA polymerase II subunit B, RNA polymerase II subunit 2, RNA polymerase II subunit B2	35	8.91547e+08
Q9P2E3	Q9P2E3	ZNFX1	NFX1-type zinc finger-containing protein 1	1.89181	0.0147851	0.0116746	0.0112604	0.0116467	0.00919644	0.00887021	0.00274792	0.00240068	0.0026306	0.000152805	0.000117438	0.000114603	5.56075	4.89187	4.35654	4.93639	0.603339	0.693409					O76021	O76021	RSL1D1	Ribosomal L1 domain-containing protein 1, CATX-11, Cellular senescence-inhibited gene protein, Protein PBK1	25	4.95474	Yes		P15311	P15311	EZR	Ezrin, Cytovillin, Villin-2, p81	45	6.17305e+09	4.65134e+09	5.46882e+09		P11387	P11387	TOP1	DNA topoisomerase 1, 5.6.2.1, DNA topoisomerase I	35	1.22334e+09
Q15365	Q15365	PCBP1	Poly(rC)-binding protein 1, Alpha-CP1, Heterogeneous nuclear ribonucleoprotein E1, hnRNP E1, Nucleic acid-binding protein SUB2.3	4.22259	0.494573	0.519838	0.435991	0.469429	0.493409	0.413825	0.115007	0.118559	0.129635	0.0061589	0.00630083	0.00534661	5.35522	5.3145	4.12435	4.93136	0.699182	0.692966					Q99729	Q99729	HNRNPAB	Heterogeneous nuclear ribonucleoprotein A/B, hnRNP A/B, APOBEC1-binding protein 1, ABBP-1	25	4.65522	Yes		Q02543	Q02543	RPL18A	60S ribosomal protein L18a, Large ribosomal subunit protein eL20	45	6.52031e+09	8.22163e+09	8.27057e+09		Q13283	Q13283	G3BP1	Ras GTPase-activating protein-binding protein 1, G3BP-1, 3.6.4.12, 3.6.4.13, ATP-dependent DNA helicase VIII, hDH VIII, GAP SH3 domain-binding protein 1	34	7.95247e+09
Q16629	Q16629	SRSF7	Serine/arginine-rich splicing factor 7, Splicing factor 9G8, Splicing factor, arginine/serine-rich 7	3.23031	0.282528	0.301097	0.285549	0.255321	0.272103	0.258052	0.0615131	0.0724183	0.0738439	0.00334982	0.00347475	0.00333403	5.4457	4.79817	4.51497	4.91961	0.477098	0.691931					O60306	O60306	AQR	RNA helicase aquarius, 3.6.4.13, Intron-binding protein of 160 kDa, IBP160	25	3.40713	Yes		Q8TDD1	Q8TDD1	DDX54	ATP-dependent RNA helicase DDX54, 3.6.4.13, ATP-dependent RNA helicase DP97, DEAD box RNA helicase 97 kDa, DEAD box protein 54	45	4.17916e+09	2.68055e+09	1.91351e+09		P50914	P50914	RPL14	60S ribosomal protein L14, CAG-ISL 7, Large ribosomal subunit protein eL14	34	1.68018e+10
Q8NC51	Q8NC51	SERBP1	Plasminogen activator inhibitor 1 RNA-binding protein, PAI1 RNA-binding protein 1, PAI-RBP1, SERPINE1 mRNA-binding protein 1	4.77313	1.05581	1.04178	1.03203	1.01856	1.00502	0.995614	0.235949	0.24603	0.347432	0.0133635	0.0128341	0.0128633	5.66372	5.21648	3.7024	4.86087	1.02788	0.686714					Q4G0J3	Q4G0J3	LARP7	La-related protein 7, La ribonucleoprotein domain family member 7, hLARP7, P-TEFb-interaction protein for 7SK stability, PIP7S	25	2.71103	Yes		Q9NTJ3	Q9NTJ3	SMC4	Structural maintenance of chromosomes protein 4, SMC protein 4, SMC-4, Chromosome-associated polypeptide C, hCAP-C, XCAP-C homolog	45	2.02912e+09	1.62407e+09	1.65293e+09		O15371	O15371	EIF3D	Eukaryotic translation initiation factor 3 subunit D, eIF3d, Eukaryotic translation initiation factor 3 subunit 7, eIF-3-zeta, eIF3 p66	34	4.40276e+09
Q8N5L8	Q8N5L8	RPP25L	Ribonuclease P protein subunit p25-like protein, RNase P protein subunit-like p25, Rpp25-like protein	10	0.00568564	0.00488587	0.00423854	0.00568009	0.0048811	0.00423441	0.00112129	0.00136606	0.00163144	7.45228e-05	6.23316e-05	5.47085e-05	6.64619	4.56287	3.35338	4.85415	1.66562	0.686113					Q9C0J8	Q9C0J8	WDR33	pre-mRNA 3' end processing protein WDR33, WD repeat-containing protein 33, WD repeat-containing protein of 146 kDa	25	2.3031	Yes		Q8NC51	Q8NC51	SERBP1	Plasminogen activator inhibitor 1 RNA-binding protein, PAI1 RNA-binding protein 1, PAI-RBP1, SERPINE1 mRNA-binding protein 1	44	1.37844e+10	1.43735e+10	2.02976e+10		Q7KZ85	Q7KZ85	SUPT6H	Transcription elongation factor SPT6, hSPT6, Histone chaperone suppressor of Ty6, Tat-cotransactivator 2 protein, Tat-CT2 protein	34	6.38406e+08
Q1KMD3	Q1KMD3	HNRNPUL2	Heterogeneous nuclear ribonucleoprotein U-like protein 2, Scaffold-attachment factor A2, SAF-A2	3.53057	0.0435233	0.0446554	0.0498478	0.0400569	0.0410989	0.0458778	0.0117769	0.0110661	0.0110918	0.000525547	0.000524833	0.000592741	4.46253	4.74272	5.34396	4.84974	0.450359	0.685718					Q9UII4	Q9UII4	HERC5	E3 ISG15--protein ligase HERC5, 2.3.2.-, Cyclin-E-binding protein 1, HECT domain and RCC1-like domain-containing protein 5	25	0.918672	Yes		O75533	O75533	SF3B1	Splicing factor 3B subunit 1, Pre-mRNA-splicing factor SF3b 155 kDa subunit, SF3b155, Spliceosome-associated protein 155, SAP 155	44	2.09273e+09	1.79591e+09	1.82383e+09		Q9H0J9	Q9H0J9	PARP12	Protein mono-ADP-ribosyltransferase PARP12, 2.4.2.-, ADP-ribosyltransferase diphtheria toxin-like 12, ARTD12, Poly [ADP-ribose] polymerase 12, PARP-12, Zinc finger CCCH domain-containing protein 1	33	1.45038e+09
Q9BZE1	Q9BZE1	MRPL37	39S ribosomal protein L37, mitochondrial, L37mt, MRP-L37, 39S ribosomal protein L2, mitochondrial, L2mt, MRP-L2, Mitochondrial large ribosomal subunit protein mL37	2.91423	0.0326043	0.0294166	0.0271283	0.0287857	0.0259713	0.023951	0.0075105	0.00658733	0.00695434	0.000377668	0.000331654	0.000309447	5.02854	5.03473	4.44969	4.83765	0.335997	0.684635					Q7L0Y3	Q7L0Y3	TRMT10C	tRNA methyltransferase 10 homolog C, HBV pre-S2 trans-regulated protein 2, Mitochondrial ribonuclease P protein 1, Mitochondrial RNase P protein 1, RNA (guanine-9-)-methyltransferase domain-containing protein 1, Renal carcinoma antigen NY-REN-49, mRNA methyladenosine-N(1)-methyltransferase, 2.1.1.-, tRNA (adenine(9)-N(1))-methyltransferase, 2.1.1.218, tRNA (guanine(9)-N(1))-methyltransferase, 2.1…	25	0.153824	Yes		Q16531	Q16531	DDB1	DNA damage-binding protein 1, DDB p127 subunit, DNA damage-binding protein a, DDBa, Damage-specific DNA-binding protein 1, HBV X-associated protein 1, XAP-1, UV-damaged DNA-binding factor, UV-damaged DNA-binding protein 1, UV-DDB 1, XPE-binding factor, XPE-BF, Xeroderma pigmentosum group E-complementing protein, XPCe	44	3.53566e+09	3.05951e+09	3.18559e+09		P05455	P05455	SSB	Lupus La protein, La autoantigen, La ribonucleoprotein, Sjoegren syndrome type B antigen, SS-B	33	3.83693e+09
Q13243	Q13243	SRSF5	Serine/arginine-rich splicing factor 5, Delayed-early protein HRS, Pre-mRNA-splicing factor SRP40, Splicing factor, arginine/serine-rich 5	2.98538	0.0490368	0.0539034	0.0507662	0.043539	0.0478599	0.0450745	0.00958516	0.0124207	0.016314	0.000571231	0.000611171	0.000582363	5.95954	4.92059	3.5697	4.81661	1.19831	0.682742					P54886	P54886	ALDH18A1	Delta-1-pyrroline-5-carboxylate synthase, P5CS, Aldehyde dehydrogenase family 18 member A1, Glutamate 5-kinase, GK, 2.7.2.11, Gamma-glutamyl kinase, Gamma-glutamyl phosphate reductase, GPR, 1.2.1.41, Glutamate-5-semialdehyde dehydrogenase, Glutamyl-gamma-semialdehyde dehydrogenase	25	-0.13144	Yes		P06744	P06744	GPI	Glucose-6-phosphate isomerase, GPI, 5.3.1.9, Autocrine motility factor, AMF, Neuroleukin, NLK, Phosphoglucose isomerase, PGI, Phosphohexose isomerase, PHI, Sperm antigen 36, SA-36	44	9.51458e+09	6.58973e+09	9.69628e+09		Q15459	Q15459	SF3A1	Splicing factor 3A subunit 1, SF3a120, Spliceosome-associated protein 114, SAP 114	33	2.64231e+09
Q9H7E2	Q9H7E2	TDRD3	Tudor domain-containing protein 3	3.09502	0.00122066	0.00129497	0.00230575	0.00109277	0.00115929	0.00206418	0.000503999	0.000458601	0.00032431	1.43371e-05	1.48042e-05	2.66691e-05	2.84467	3.22811	8.22336	4.76538	3.00083	0.678097					P35579	P35579	MYH9	Myosin, heavy polypeptide 9, non-muscle, isoform CRA_a	25	-0.929892	Yes		Q01813	Q01813	PFKP	ATP-dependent 6-phosphofructokinase, platelet type, ATP-PFK, PFK-P, 2.7.1.11, 6-phosphofructokinase type C, Phosphofructo-1-kinase isozyme C, PFK-C, Phosphohexokinase	44	6.7234e+09	5.67178e+09	6.24147e+09		Q9H0D6	Q9H0D6	XRN2	5'-3' exoribonuclease 2, 3.1.13.-, DHM1-like protein, DHP protein	33	1.35926e+09
Q9BVS4	Q9BVS4	RIOK2	Serine/threonine-protein kinase RIO2, 2.7.11.1, RIO kinase 2	3.33125	0.0370122	0.0389998	0.0445929	0.0336672	0.0354751	0.0405628	0.00906062	0.0077816	0.0146169	0.000441713	0.000453017	0.000524071	4.87509	5.82164	3.58538	4.7607	1.12251	0.677671					Q01085	Q01085	TIAL1	Nucleolysin TIAR, TIA-1-related protein	24	5.14304	Yes		P26358	P26358	DNMT1	DNA (cytosine-5)-methyltransferase 1, Dnmt1, 2.1.1.37, CXXC-type zinc finger protein 9, DNA methyltransferase HsaI, DNA MTase HsaI, M.HsaI, MCMT	44	1.22685e+09	1.18462e+09	1.01596e+09		A0AV96	A0AV96	RBM47	RNA-binding protein 47, RNA-binding motif protein 47	32	8.08512e+09
O00425	O00425	IGF2BP3	Insulin-like growth factor 2 mRNA-binding protein 3, IGF2 mRNA-binding protein 3, IMP-3, IGF-II mRNA-binding protein 3, KH domain-containing protein overexpressed in cancer, hKOC, VICKZ family member 3	3.16005	0.0797146	0.0792187	0.0845553	0.071694	0.0712479	0.0760476	0.0208522	0.0221249	0.0177328	0.000940625	0.000909835	0.000982535	4.51091	4.11227	5.54076	4.72132	0.737121	0.674063					Q02543	Q02543	RPL18A	60S ribosomal protein L18a, Large ribosomal subunit protein eL20	24	4.66155	Yes		Q9Y5B9	Q9Y5B9	SUPT16H	FACT complex subunit SPT16, Chromatin-specific transcription elongation factor 140 kDa subunit, FACT 140 kDa subunit, FACTp140, Facilitates chromatin transcription complex subunit SPT16, hSPT16	44	2.49954e+09	2.63139e+09	2.44776e+09		Q12849	Q12849	GRSF1	G-rich sequence factor 1, GRSF-1	32	6.73974e+09
Q8IX01	Q8IX01	SUGP2	SURP and G-patch domain-containing protein 2, Arginine/serine-rich-splicing factor 14, Splicing factor, arginine/serine-rich 14	4.34828	0.0291132	0.0266409	0.0301431	0.0277508	0.0253941	0.0287325	0.00778353	0.00752144	0.0071831	0.000364091	0.000324283	0.000371224	4.67771	4.31145	5.16802	4.71906	0.429777	0.673855					Q15397	Q15397	PUM3	Pumilio homolog 3, HBV X-transactivated gene 5 protein, HBV XAg-transactivated protein 5, Minor histocompatibility antigen HA-8, HLA-HA8	24	3.26667	Yes		Q12906	Q12906	ILF3	Interleukin enhancer-binding factor 3, Double-stranded RNA-binding protein 76, DRBP76, M-phase phosphoprotein 4, MPP4, Nuclear factor associated with dsRNA, NFAR, Nuclear factor of activated T-cells 90 kDa, NF-AT-90, Translational control protein 80, TCP80	44	5.92709e+09	4.70817e+09	5.18155e+09		O15226	O15226	NKRF	NF-kappa-B-repressing factor, NFkB-repressing factor, NRF, Protein ITBA4	32	1.86195e+09
Q6P5R6	Q6P5R6	RPL22L1	60S ribosomal protein L22-like 1, Large ribosomal subunit protein eL22-like 1	4.45538	0.0195615	0.0177629	0.01425	0.0187087	0.0169885	0.0136288	0.00415501	0.00495574	0.00456537	0.000245459	0.000216943	0.000176084	5.90753	4.37761	3.85695	4.71403	1.06588	0.673392					P12956	P12956	XRCC6	X-ray repair cross-complementing protein 6, 3.6.4.-, 4.2.99.-, 5'-deoxyribose-5-phosphate lyase Ku70, 5'-dRP lyase Ku70, 70 kDa subunit of Ku antigen, ATP-dependent DNA helicase 2 subunit 1, ATP-dependent DNA helicase II 70 kDa subunit, CTC box-binding factor 75 kDa subunit, CTC75, CTCBF, DNA repair protein XRCC6, Lupus Ku autoantigen protein p70, Ku70, Thyroid-lupus autoantigen, TLAA, X-ray repa…	24	3.13043	Yes		Q9UQ80	Q9UQ80	PA2G4	Proliferation-associated protein 2G4, Cell cycle protein p38-2G4 homolog, hG4-1, ErbB3-binding protein 1	44	1.01313e+10	9.5856e+09	9.05434e+09		Q96KR1	Q96KR1	ZFR	Zinc finger RNA-binding protein, hZFR, M-phase phosphoprotein homolog	32	1.69639e+09
Q13823	Q13823	GNL2	Nucleolar GTP-binding protein 2, Autoantigen NGP-1	4.32914	0.0696169	0.0659449	0.0662198	0.0663176	0.0628196	0.0630815	0.0169547	0.0170866	0.0191799	0.000870087	0.000802206	0.000815013	5.13184	4.69494	4.2493	4.69203	0.441274	0.67136					Q9NQ55	Q9NQ55	PPAN	Suppressor of SWI4 1 homolog, Ssf-1, Brix domain-containing protein 3, Peter Pan homolog	24	3.02172	Yes		P33992	P33992	MCM5	DNA replication licensing factor MCM5, 3.6.4.12, CDC46 homolog, P1-CDC46	44	2.43337e+09	2.57675e+09	2.65137e+09		Q6P158	Q6P158	DHX57	Putative ATP-dependent RNA helicase DHX57, 3.6.4.13, DEAH box protein 57	32	1.02509e+09
Q9BVJ6	Q9BVJ6	UTP14A	U3 small nucleolar RNA-associated protein 14 homolog A, Antigen NY-CO-16, Serologically defined colon cancer antigen 16	4.05325	0.0488424	0.0487107	0.0465789	0.0460675	0.0459433	0.0439326	0.0143768	0.0127567	0.0111031	0.000604406	0.000586697	0.00056761	4.20403	4.59913	5.11215	4.63844	0.455338	0.666372					Q9NYF8	Q9NYF8	BCLAF1	Bcl-2-associated transcription factor 1, Btf, BCLAF1 and THRAP3 family member 1	24	2.3156	Yes		Q8TEQ6	Q8TEQ6	GEMIN5	Gem-associated protein 5, Gemin5	43	1.52744e+09	1.40654e+09	1.43035e+09		O75643	O75643	SNRNP200	U5 small nuclear ribonucleoprotein 200 kDa helicase, 3.6.4.13, Activating signal cointegrator 1 complex subunit 3-like 1, BRR2 homolog, U5 snRNP-specific 200 kDa protein, U5-200KD	32	7.07445e+08
P47914	P47914	RPL29	60S ribosomal protein L29, Cell surface heparin-binding protein HIP, Large ribosomal subunit protein eL29	5.55146	0.263813	0.314736	0.270441	0.258305	0.308165	0.264795	0.066527	0.101701	0.0701432	0.00338896	0.00393527	0.00342115	5.09412	3.86947	4.87738	4.61366	0.653536	0.664045					P18583	P18583	SON	Protein SON, Bax antagonist selected in saccharomyces 1, BASS1, Negative regulatory element-binding protein, NRE-binding protein, Protein DBP-5, SON3	24	0.781022	Yes		P04843	P04843	RPN1	Dolichyl-diphosphooligosaccharide--protein glycosyltransferase subunit 1, Dolichyl-diphosphooligosaccharide--protein glycosyltransferase 67 kDa subunit, Ribophorin I, RPN-I, Ribophorin-1	43	3.75634e+09	3.02719e+09	3.35732e+09		Q01085	Q01085	TIAL1	Nucleolysin TIAR, TIA-1-related protein	31	1.788e+10
Q08170	Q08170	SRSF4	Serine/arginine-rich splicing factor 4, Pre-mRNA-splicing factor SRP75, SRP001LB, Splicing factor, arginine/serine-rich 4	4.59784	0.0139158	0.013787	0.0144764	0.0133639	0.0132403	0.0139023	0.00302566	0.00403168	0.00490858	0.000175334	0.000169078	0.000179617	5.79492	4.19374	3.65925	4.5493	1.11134	0.657945					Q13148	Q13148	TARDBP	TAR DNA-binding protein 43, TDP-43	23	5.48921	Yes		Q9NW13	Q9NW13	RBM28	RNA-binding protein 28, RNA-binding motif protein 28	43	1.33041e+09	1.52548e+09	1.24572e+09		Q1KMD3	Q1KMD3	HNRNPUL2	Heterogeneous nuclear ribonucleoprotein U-like protein 2, Scaffold-attachment factor A2, SAF-A2	31	2.5428e+09
P61978	P61978	HNRNPK	Heterogeneous nuclear ribonucleoprotein K, hnRNP K, Transformation up-regulated nuclear protein, TUNP	5.34661	0.796152	0.813262	0.820622	0.777055	0.793755	0.800938	0.224411	0.236186	0.221769	0.010195	0.0101362	0.0103481	4.54298	4.29165	4.66617	4.50027	0.190881	0.653238					Q8WXF1	Q8WXF1	PSPC1	Paraspeckle component 1, Paraspeckle protein 1	23	4.58285	Yes		P18124	P18124	RPL7	60S ribosomal protein L7, Large ribosomal subunit protein uL30	43	1.60718e+10	1.88793e+10	1.58692e+10		Q9Y2W1	Q9Y2W1	THRAP3	Thyroid hormone receptor-associated protein 3, BCLAF1 and THRAP3 family member 2, Thyroid hormone receptor-associated protein complex 150 kDa component, Trap150	31	3.62347e+09
P17844	P17844	DDX5	Probable ATP-dependent RNA helicase DDX5, 3.6.4.13, DEAD box protein 5, RNA helicase p68	3.61851	0.661857	0.629335	0.618976	0.612027	0.581954	0.572375	0.184845	0.152147	0.173797	0.00802979	0.00743155	0.00739508	4.34406	4.88446	4.25502	4.49451	0.340623	0.652682					Q03701	Q03701	CEBPZ	CCAAT/enhancer-binding protein zeta, CCAAT-box-binding transcription factor, CBF, CCAAT-binding factor	23	4.00791	Yes		O76021	O76021	RSL1D1	Ribosomal L1 domain-containing protein 1, CATX-11, Cellular senescence-inhibited gene protein, Protein PBK1	43	5.39053e+09	6.95505e+09	5.75592e+09		Q03701	Q03701	CEBPZ	CCAAT/enhancer-binding protein zeta, CCAAT-box-binding transcription factor, CBF, CCAAT-binding factor	31	1.62728e+09
Q14690	Q14690	PDCD11	Protein RRP5 homolog, NF-kappa-B-binding protein, NFBP, Programmed cell death protein 11	3.76231	0.147606	0.136253	0.128818	0.137475	0.126901	0.119977	0.0353732	0.0384518	0.0375707	0.00180367	0.00162053	0.0015501	5.09898	4.21444	4.12582	4.47974	0.5381	0.651253					Q15020	Q15020	SART3	Squamous cell carcinoma antigen recognized by T-cells 3, SART-3, Tat-interacting protein of 110 kDa, Tip110, p110 nuclear RNA-binding protein	23	1.93949	Yes		P11387	P11387	TOP1	DNA topoisomerase 1, 5.6.2.1, DNA topoisomerase I	43	2.11086e+09	2.0406e+09	1.83118e+09		Q15020	Q15020	SART3	Squamous cell carcinoma antigen recognized by T-cells 3, SART-3, Tat-interacting protein of 110 kDa, Tip110, p110 nuclear RNA-binding protein	31	1.41774e+09
P35268	P35268	RPL22	60S ribosomal protein L22, EBER-associated protein, EAP, Epstein-Barr virus small RNA-associated protein, Heparin-binding protein HBp15, Large ribosomal subunit protein eL22	5.035	0.626382	0.546181	0.508184	0.607842	0.530015	0.493143	0.139396	0.186331	0.164381	0.00797489	0.0067683	0.00637141	5.72105	3.63241	3.87601	4.40982	1.14207	0.644421					Q8TEQ6	Q8TEQ6	GEMIN5	Gem-associated protein 5, Gemin5	23	1.74599	Yes		Q5T4S7	Q5T4S7	UBR4	E3 ubiquitin-protein ligase UBR4, 2.3.2.27, 600 kDa retinoblastoma protein-associated factor, N-recognin-4, RING-type E3 ubiquitin transferase UBR4, Retinoblastoma-associated factor of 600 kDa, RBAF600, p600, Zinc finger UBR1-type protein 1	43	1.35079e+09	1.32089e+09	1.46674e+09		Q9BVP2	Q9BVP2	GNL3	Guanine nucleotide-binding protein-like 3, E2-induced gene 3 protein, Novel nucleolar protein 47, NNP47, Nucleolar GTP-binding protein 3, Nucleostemin	31	2.65082e+09
Q08211	Q08211	DHX9	ATP-dependent RNA helicase A, 3.6.4.13, DEAH box protein 9, DExH-box helicase 9, Leukophysin, LKP, Nuclear DNA helicase II, NDH II, RNA helicase A	3.97618	0.688204	0.624671	0.592106	0.647087	0.587351	0.556731	0.168389	0.184761	0.175556	0.00848979	0.00750047	0.00719296	5.04177	4.05954	4.09725	4.39952	0.55652	0.643405					Q6P158	Q6P158	DHX57	Putative ATP-dependent RNA helicase DHX57, 3.6.4.13, DEAH box protein 57	23	1.06956	Yes		Q9UHB6	Q9UHB6	LIMA1	LIM domain and actin-binding protein 1, Epithelial protein lost in neoplasm	43	2.98287e+09	2.71794e+09	2.20053e+09		O00541	O00541	PES1	Pescadillo homolog	31	1.90418e+09
P38159	P38159	RBMX	RNA-binding motif protein, X chromosome, Glycoprotein p43, Heterogeneous nuclear ribonucleoprotein G, hnRNP G	5.64628	0.410383	0.43847	0.508203	0.402349	0.429886	0.498255	0.134532	0.150531	0.115275	0.00527882	0.00548965	0.00643745	3.92385	3.64686	5.58443	4.38505	1.04789	0.641974					Q9H0H5	Q9H0H5	RACGAP1	Rac GTPase-activating protein 1, Male germ cell RacGap, MgcRacGAP, Protein CYK4 homolog, CYK4, HsCYK-4	23	-0.0743437	Yes		Q12931	Q12931	TRAP1	Heat shock protein 75 kDa, mitochondrial, HSP 75, TNFR-associated protein 1, Tumor necrosis factor type 1 receptor-associated protein, TRAP-1	42	4.28488e+09	3.4104e+09	4.29012e+09		A0A384MDY0	A0A384MDY0	CTNNA1	Catenin (Cadherin-associated protein), alpha 1, 102kDa, isoform CRA_b, Epididymis secretory sperm binding protein	31	4.58738e+08
O75127	O75127	PTCD1	Pentatricopeptide repeat-containing protein 1, mitochondrial	1.32159	0.00205901	0.00244926	0.00263526	0.00147063	0.00174936	0.0018822	0.000606173	0.00049326	0.000480058	1.92946e-05	2.23393e-05	2.43181e-05	3.18302	4.52891	5.06566	4.2592	0.969867	0.629328					P08238	P08238	HSP90AB1	Heat shock protein HSP 90-beta, HSP 90, Heat shock 84 kDa, HSP 84, HSP84	23	-0.819508	Yes		P34897	P34897	SHMT2	Serine hydroxymethyltransferase, mitochondrial, SHMT, 2.1.2.1, Glycine hydroxymethyltransferase, Serine methylase	42	6.18677e+09	4.82326e+09	5.70887e+09		P26368	P26368	U2AF2	Splicing factor U2AF 65 kDa subunit, U2 auxiliary factor 65 kDa subunit, hU2AF(65), hU2AF65, U2 snRNP auxiliary factor large subunit	30	9.80953e+09
Q92900	Q92900	UPF1	Regulator of nonsense transcripts 1, 3.6.4.12, 3.6.4.13, ATP-dependent helicase RENT1, Nonsense mRNA reducing factor 1, NORF1, Up-frameshift suppressor 1 homolog, hUpf1	3.97849	0.147909	0.136917	0.127847	0.139086	0.128749	0.12022	0.0424425	0.0364048	0.0414949	0.00182481	0.00164413	0.00155324	4.29947	4.51624	3.74322	4.18631	0.398742	0.621831					Q00610	Q00610	CLTC	Clathrin heavy chain 1, Clathrin heavy chain on chromosome 17, CLH-17	23	-0.942047	Yes		Q96AE4	Q96AE4	FUBP1	Far upstream element-binding protein 1, FBP, FUSE-binding protein 1, DNA helicase V, hDH V	42	3.7052e+09	3.05882e+09	4.10834e+09		P38159	P38159	RBMX	RNA-binding motif protein, X chromosome, Glycoprotein p43, Heterogeneous nuclear ribonucleoprotein G, hnRNP G	30	2.39762e+10
Q13242	Q13242	SRSF9	Serine/arginine-rich splicing factor 9, Pre-mRNA-splicing factor SRp30C, Splicing factor, arginine/serine-rich 9	4.79761	0.0300922	0.0319242	0.0439115	0.0290477	0.0308161	0.0423874	0.0124967	0.0104696	0.00998003	0.000381106	0.000393522	0.000547645	3.04965	3.75873	5.48741	4.0986	1.25391	0.612635					Q9NY93	Q9NY93	DDX56	Probable ATP-dependent RNA helicase DDX56, 3.6.4.13, ATP-dependent 61 kDa nucleolar RNA helicase, DEAD box protein 21, DEAD box protein 56	22	4.64671	Yes		P16615	P16615	ATP2A2	Sarcoplasmic/endoplasmic reticulum calcium ATPase 2, SERCA2, SR Ca(2+)-ATPase 2, 7.2.2.10, Calcium pump 2, Calcium-transporting ATPase sarcoplasmic reticulum type, slow twitch skeletal muscle isoform, Endoplasmic reticulum class 1/2 Ca(2+) ATPase	42	2.99201e+09	3.34504e+09	2.65694e+09		Q71RC2	Q71RC2	LARP4	La-related protein 4, La ribonucleoprotein domain family member 4	30	2.52826e+09
Q12926	Q12926	ELAVL2	ELAV-like protein 2, ELAV-like neuronal protein 1, Hu-antigen B, HuB, Nervous system-specific RNA-binding protein Hel-N1	4.50733	0.0521133	0.0563413	0.0451484	0.0499184	0.0539683	0.0432468	0.0175027	0.0135424	0.0167553	0.00065493	0.000689175	0.000558749	3.74187	5.08901	3.33475	4.05521	0.918146	0.608013					Q9GZR7	Q9GZR7	DDX24	ATP-dependent RNA helicase DDX24, 3.6.4.13, DEAD box protein 24	22	4.24556	Yes		P54577	P54577	YARS1	Tyrosine--tRNA ligase, cytoplasmic, 6.1.1.1, Tyrosyl-tRNA synthetase, TyrRS	42	3.50363e+09	2.27494e+09	2.12748e+09		Q15050	Q15050	RRS1	Ribosome biogenesis regulatory protein homolog	30	2.61504e+09
P84103	P84103	SRSF3	Serine/arginine-rich splicing factor 3, Pre-mRNA-splicing factor SRP20, Splicing factor, arginine/serine-rich 3	2.30029	0.239713	0.268038	0.303743	0.199259	0.222804	0.252483	0.0811841	0.0646229	0.0730205	0.00261427	0.0028452	0.00326208	3.22018	4.40278	4.46735	4.0301	0.702156	0.605316					Q9BYK8	Q9BYK8	HELZ2	Helicase with zinc finger domain 2, ATP-dependent helicase PRIC285, Helicase with zinc finger 2, transcriptional coactivator, PPAR-alpha-interacting complex protein 285, PPAR-gamma DNA-binding domain-interacting protein 1, PDIP1, PPAR-gamma DBD-interacting protein 1, Peroxisomal proliferator-activated receptor A-interacting complex 285 kDa protein, 3.6.4.-	22	4.13508	Yes		Q15029	Q15029	EFTUD2	116 kDa U5 small nuclear ribonucleoprotein component, Elongation factor Tu GTP-binding domain-containing protein 2, SNU114 homolog, hSNU114, U5 snRNP-specific protein, 116 kDa, U5-116 kDa	42	4.63148e+09	5.0085e+09	4.14765e+09		Q99848	Q99848	EBNA1BP2	Probable rRNA-processing protein EBP2, EBNA1-binding protein 2, Nucleolar protein p40	30	3.89264e+09
Q9NUQ6	Q9NUQ6	SPATS2L	SPATS2-like protein, DNA polymerase-transactivated protein 6, Stress granule and nucleolar protein, SGNP	2.63797	0.00547486	0.00533819	0.00496553	0.00471704	0.0045993	0.00427821	0.00142203	0.00121475	0.00193941	6.18876e-05	5.8733e-05	5.52745e-05	4.35207	4.835	2.85007	4.01238	1.03515	0.603402					Q9BVJ6	Q9BVJ6	UTP14A	U3 small nucleolar RNA-associated protein 14 homolog A, Antigen NY-CO-16, Serologically defined colon cancer antigen 16	22	4.05325	Yes		P54136	P54136	RARS1	Arginine--tRNA ligase, cytoplasmic, 6.1.1.19, Arginyl-tRNA synthetase, ArgRS	41	2.96005e+09	2.20001e+09	2.60702e+09		Q07065	Q07065	CKAP4	Cytoskeleton-associated protein 4, 63-kDa cytoskeleton-linking membrane protein, Climp-63, p63	30	9.56141e+08
Q9BRZ2	Q9BRZ2	TRIM56	E3 ubiquitin-protein ligase TRIM56, 2.3.2.27, RING finger protein 109, Tripartite motif-containing protein 56	4.99443	0.00049185	0.000496907	0.000489593	0.00047689	0.000481793	0.000474701	0.000257768	0.000122033	0.000134438	6.25679e-06	6.1525e-06	6.13314e-06	2.4273	5.04168	4.56207	4.01035	1.39178	0.603182					O60832	O60832	DKC1	H/ACA ribonucleoprotein complex subunit DKC1, 5.4.99.-, CBF5 homolog, Dyskerin, Nopp140-associated protein of 57 kDa, Nucleolar protein NAP57, Nucleolar protein family A member 4, snoRNP protein DKC1	22	3.99723	Yes		Q14692	Q14692	BMS1	Ribosome biogenesis protein BMS1 homolog, Ribosome assembly protein BMS1 homolog	41	1.07332e+09	1.25587e+09	9.29099e+08		P62081	P62081	RPS7	40S ribosomal protein S7, Small ribosomal subunit protein eS7	30	5.13466e+09
O95707	O95707	POP4	Ribonuclease P protein subunit p29, hPOP4	10	0.000618419	0.000623149	0.000413288	0.000617815	0.000622541	0.000412885	0.000178862	0.000162847	0.000213225	8.10574e-06	7.94985e-06	5.33448e-06	4.53183	4.88178	2.50181	3.97181	1.28502	0.598988					P78344	P78344	EIF4G2	Eukaryotic translation initiation factor 4 gamma 2, eIF-4-gamma 2, eIF-4G 2, eIF4G 2, Death-associated protein 5, DAP-5, p97	22	3.26126	Yes		Q16658	Q16658	FSCN1	Fascin, 55 kDa actin-bundling protein, Singed-like protein, p55	41	9.03276e+09	9.21618e+09	8.57631e+09		P62424	P62424	RPL7A	60S ribosomal protein L7a, Large ribosomal subunit protein eL8, PLA-X polypeptide, Surfeit locus protein 3	30	3.19687e+09
Q9UII4	Q9UII4	HERC5	E3 ISG15--protein ligase HERC5, 2.3.2.-, Cyclin-E-binding protein 1, HECT domain and RCC1-like domain-containing protein 5	0.918672	0.0238438	0.0193004	0.0200151	0.0155944	0.012623	0.0130904	0.00374046	0.0057923	0.004793	0.000204599	0.000161195	0.000169128	5.46989	2.78292	3.52864	3.92715	1.3871	0.594077					Q14498	Q14498	RBM39	RNA-binding protein 39, CAPER alpha, CAPERalpha, Hepatocellular carcinoma protein 1, RNA-binding motif protein 39, RNA-binding region-containing protein 2, Splicing factor HCC1	22	2.67536	Yes		P17987	P17987	TCP1	T-complex protein 1 subunit alpha, TCP-1-alpha, CCT-alpha	41	7.47909e+09	5.06475e+09	6.47292e+09		Q8IWR0	Q8IWR0	ZC3H7A	Zinc finger CCCH domain-containing protein 7A	29	1.38523e+09
Q9UHX1	Q9UHX1	PUF60	Poly(U)-binding-splicing factor PUF60, 60 kDa poly(U)-binding-splicing factor, FUSE-binding protein-interacting repressor, FBP-interacting repressor, Ro-binding protein 1, RoBP1, Siah-binding protein 1, Siah-BP1	3.82546	0.0684314	0.068736	0.070156	0.0639224	0.064207	0.0655334	0.0253099	0.0181708	0.0214528	0.000838663	0.000819923	0.000846692	3.31357	4.51232	3.94676	3.92422	0.599693	0.593753					P30876	P30876	POLR2B	DNA-directed RNA polymerase II subunit RPB2, 2.7.7.6, DNA-directed RNA polymerase II 140 kDa polypeptide, DNA-directed RNA polymerase II subunit B, RNA polymerase II subunit 2, RNA polymerase II subunit B2	22	1.78008	Yes		P11388	P11388	TOP2A	DNA topoisomerase 2-alpha, 5.6.2.2, DNA topoisomerase II, alpha isozyme	41	2.58777e+09	2.13555e+09	2.14219e+09		Q8IXT5	Q8IXT5	RBM12B	RNA-binding protein 12B, RNA-binding motif protein 12B	29	1.30962e+09
Q86TG7	Q86TG7	PEG10	Retrotransposon-derived protein PEG10, Embryonal carcinoma differentiation-regulated protein, Mammalian retrotransposon-derived protein 2, Myelin expression factor 3-like protein 1, MEF3-like protein 1, Paternally expressed gene 10 protein, Retrotransposon gag domain-containing protein 3, Retrotransposon-derived gag-like polyprotein, Ty3/Gypsy-like protein	4.07877	0.00585232	0.00671416	0.0064391	0.00552533	0.00633903	0.00607933	0.00234141	0.00168316	0.00210497	7.24924e-05	8.09494e-05	7.8545e-05	3.0961	4.80937	3.7314	3.87895	0.866114	0.588715					P08621	P08621	SNRNP70	U1 small nuclear ribonucleoprotein 70 kDa, U1 snRNP 70 kDa, U1-70K, snRNP70	22	1.23386	Yes		P62701	P62701	RPS4X	40S ribosomal protein S4, X isoform, SCR10, Single copy abundant mRNA protein, Small ribosomal subunit protein eS4	41	1.72175e+10	1.94889e+10	1.95402e+10		P55795	P55795	HNRNPH2	Heterogeneous nuclear ribonucleoprotein H2, hnRNP H2, FTP-3, Heterogeneous nuclear ribonucleoprotein H', hnRNP H'	29	8.39135e+09
Q7Z417	Q7Z417	NUFIP2	FMR1-interacting protein NUFIP2, 82 kDa FMRP-interacting protein, 82-FIP, Cell proliferation-inducing gene 1 protein, FMRP-interacting protein 2, Nuclear FMR1-interacting protein 2	3.27224	0.0216048	0.0259264	0.0256819	0.0195783	0.0234946	0.0232731	0.00806293	0.00730033	0.00697936	0.000256868	0.000300026	0.000300688	3.18579	4.10976	4.30824	3.86793	0.599032	0.587479					Q9BVP2	Q9BVP2	GNL3	Guanine nucleotide-binding protein-like 3, E2-induced gene 3 protein, Novel nucleolar protein 47, NNP47, Nucleolar GTP-binding protein 3, Nucleostemin	22	1.06086	Yes		P35221	A0A384MDY0	CTNNA1	Catenin (Cadherin-associated protein), alpha 1, 102kDa, isoform CRA_b, Epididymis secretory sperm binding protein	41	1.85073e+09	1.17297e+09	1.50903e+09		O75179	O75179	ANKRD17	Ankyrin repeat domain-containing protein 17, Gene trap ankyrin repeat protein, Serologically defined breast cancer antigen NY-BR-16	29	1.50617e+09
P49750	P49750	YLPM1	YLP motif-containing protein 1, Nuclear protein ZAP3, ZAP113	1.2095	0.0040908	0.00500536	0.00482947	0.00285587	0.00349434	0.00337155	0.00109896	0.00102792	0.00114209	3.7469e-05	4.46227e-05	4.35604e-05	3.40948	4.34106	3.8141	3.85488	0.467126	0.586011					P07814	P07814	EPRS1	Bifunctional glutamate/proline--tRNA ligase, Bifunctional aminoacyl-tRNA synthetase, Cell proliferation-inducing gene 32 protein, Glutamatyl-prolyl-tRNA synthetase, Glutamate--tRNA ligase, 6.1.1.17, Glutamyl-tRNA synthetase, GluRS, Proline--tRNA ligase, 6.1.1.15, Prolyl-tRNA synthetase	22	0.735596	Yes		Q8NE71	Q8NE71	ABCF1	ATP-binding cassette sub-family F member 1, ATP-binding cassette 50, TNF-alpha-stimulated ABC protein	40	1.78819e+09	1.79093e+09	1.77396e+09		Q9UII4	Q9UII4	HERC5	E3 ISG15--protein ligase HERC5, 2.3.2.-, Cyclin-E-binding protein 1, HECT domain and RCC1-like domain-containing protein 5	29	1.39305e+09
P62308	P62308	SNRPG	Small nuclear ribonucleoprotein G, snRNP-G, Sm protein G, Sm-G, SmG	4.60015	0.00828106	0.0122836	0.00954466	0.00795315	0.0117972	0.00916671	0.00318108	0.00328797	0.00320875	0.000104345	0.00015065	0.000118434	3.28018	4.58185	3.69097	3.851	0.665426	0.585574					Q9H0D6	Q9H0D6	XRN2	5'-3' exoribonuclease 2, 3.1.13.-, DHM1-like protein, DHP protein	22	0.454583	Yes		O15067	O15067	PFAS	Phosphoribosylformylglycinamidine synthase, FGAM synthase, FGAMS, 6.3.5.3, Formylglycinamide ribonucleotide amidotransferase, FGAR amidotransferase, FGAR-AT, Formylglycinamide ribotide amidotransferase, Phosphoribosylformylglycineamide amidotransferase	40	1.98133e+09	1.25609e+09	1.80162e+09		Q9UHX1	Q9UHX1	PUF60	Poly(U)-binding-splicing factor PUF60, 60 kDa poly(U)-binding-splicing factor, FUSE-binding protein-interacting repressor, FBP-interacting repressor, Ro-binding protein 1, RoBP1, Siah-binding protein 1, Siah-BP1	29	3.99804e+09
Q9BQC6	Q9BQC6	MRPL57	Ribosomal protein 63, mitochondrial, hMRP63, Mitochondrial large ribosomal subunit protein mL63, Mitochondrial ribosomal protein 63, Mitochondrial ribosomal protein L57	5.98261	0.00183288	0.00285059	0.00111448	0.00180434	0.00280621	0.00109713	0.00072148	0.000934545	0.000321525	2.3673e-05	3.58353e-05	1.4175e-05	3.28117	3.83452	4.40866	3.84145	0.563778	0.584495					P49411	P49411	TUFM	Elongation factor Tu, mitochondrial, EF-Tu, P43	22	0.127378	Yes		P40227	P40227	CCT6A	T-complex protein 1 subunit zeta, TCP-1-zeta, Acute morphine dependence-related protein 2, CCT-zeta-1, HTR3, Tcp20	40	6.87466e+09	5.11443e+09	6.27034e+09		O60306	O60306	AQR	RNA helicase aquarius, 3.6.4.13, Intron-binding protein of 160 kDa, IBP160	29	1.65301e+09
Q9HCJ3	Q9HCJ3	RAVER2	Ribonucleoprotein PTB-binding 2, Protein raver-2	-0.255081	0.0107719	0.0106239	0.00780834	0.00491103	0.00484355	0.00355992	0.0015286	0.001242	0.00203371	6.44327e-05	6.18522e-05	4.59942e-05	4.21516	4.98006	2.26159	3.81894	1.40188	0.581943					P68104	P68104	EEF1A1	Elongation factor 1-alpha 1, EF-1-alpha-1, Elongation factor Tu, EF-Tu, Eukaryotic elongation factor 1 A-1, eEF1A-1, Leukocyte receptor cluster member 7	22	-0.303405	Yes		P04075	P04075	ALDOA	Fructose-bisphosphate aldolase A, 4.1.2.13, Lung cancer antigen NY-LU-1, Muscle-type aldolase	40	2.68905e+10	2.16396e+10	2.3222e+10		Q8WWM7	Q8WWM7	ATXN2L	Ataxin-2-like protein, Ataxin-2 domain protein, Ataxin-2-related protein	29	1.16954e+09
O60306	O60306	AQR	RNA helicase aquarius, 3.6.4.13, Intron-binding protein of 160 kDa, IBP160	3.40713	0.0282933	0.0257378	0.0215373	0.025856	0.0235206	0.019682	0.00811311	0.00726587	0.00829427	0.00033923	0.000300358	0.000254291	4.18126	4.13382	3.06587	3.79365	0.630724	0.579057					Q14444	Q14444	CAPRIN1	Caprin-1, Cell cycle-associated protein 1, Cytoplasmic activation- and proliferation-associated protein 1, GPI-anchored membrane protein 1, GPI-anchored protein p137, GPI-p137, p137GPI, Membrane component chromosome 11 surface marker 1, RNA granule protein 105	21	5.55058	Yes		Q14980	Q14980	NUMA1	Nuclear mitotic apparatus protein 1, Nuclear matrix protein-22, NMP-22, Nuclear mitotic apparatus protein, NuMA protein, SP-H antigen	40	9.66339e+08	7.85356e+08	7.63294e+08		Q9C0J8	Q9C0J8	WDR33	pre-mRNA 3' end processing protein WDR33, WD repeat-containing protein 33, WD repeat-containing protein of 146 kDa	29	7.58191e+08
Q9UH17	Q9UH17	APOBEC3B	DNA dC->dU-editing enzyme APOBEC-3B, A3B, 3.5.4.38, Phorbolin-1-related protein, Phorbolin-2/3	3.22055	0.00590459	0.00455844	0.00426994	0.00533252	0.0041168	0.00385624	0.00152614	0.00156158	0.00150099	6.99626e-05	5.25715e-05	4.98226e-05	4.58427	3.36656	3.31932	3.75672	0.71707	0.574809					P16989	P16989	YBX3	Y-box-binding protein 3, Cold shock domain-containing protein A, DNA-binding protein A, Single-strand DNA-binding protein NF-GMB	21	5.41516	Yes		P33176	P33176	KIF5B	Kinesin-1 heavy chain, Conventional kinesin heavy chain, Ubiquitous kinesin heavy chain, UKHC	40	1.87757e+09	1.56083e+09	1.64236e+09		Q9NQ55	Q9NQ55	PPAN	Suppressor of SWI4 1 homolog, Ssf-1, Brix domain-containing protein 3, Peter Pan homolog	29	2.51996e+09
Q9P031	Q9P031	CCDC59	Thyroid transcription factor 1-associated protein 26, TTF-1-associated protein 26, Coiled-coil domain-containing protein 59, TTF-1-associated protein BR2	3.91699	0.00559341	0.00518767	0.00648706	0.00524611	0.00486556	0.00608427	0.00191491	0.00216288	0.00165345	6.8829e-05	6.21332e-05	7.86088e-05	3.59438	2.87271	4.75424	3.74044	0.949228	0.572923					P35637	P35637	FUS	RNA-binding protein FUS, 75 kDa DNA-pairing protein, Oncogene FUS, Oncogene TLS, POMp75, Translocated in liposarcoma protein	21	5.03471	Yes		P08133	P08133	ANXA6	Annexin A6, 67 kDa calelectrin, Annexin VI, Annexin-6, Calphobindin-II, CPB-II, Chromobindin-20, Lipocortin VI, Protein III, p68, p70	40	1.5636e+09	9.56986e+08	1.27884e+09		Q07955	Q07955	SRSF1	Serine/arginine-rich splicing factor 1, Alternative-splicing factor 1, ASF-1, Splicing factor, arginine/serine-rich 1, pre-mRNA-splicing factor SF2, P33 subunit	29	3.88661e+09
Q9H9L3	Q9H9L3	ISG20L2	Interferon-stimulated 20 kDa exonuclease-like 2, 3.1.-.-	10	0.000512987	0.000408897	0.000473335	0.000512486	0.000408498	0.000472873	0.000177187	0.000154953	0.000150674	6.72382e-06	5.21652e-06	6.10952e-06	3.79476	3.36652	4.0548	3.73869	0.347548	0.57272					Q9UHX1	Q9UHX1	PUF60	Poly(U)-binding-splicing factor PUF60, 60 kDa poly(U)-binding-splicing factor, FUSE-binding protein-interacting repressor, FBP-interacting repressor, Ro-binding protein 1, RoBP1, Siah-binding protein 1, Siah-BP1	21	3.82546	Yes		Q9H0A0	Q9H0A0	NAT10	RNA cytidine acetyltransferase, 2.3.1.-, 18S rRNA cytosine acetyltransferase, N-acetyltransferase 10, N-acetyltransferase-like protein, hALP	39	2.20202e+09	2.10003e+09	2.01504e+09		O00267	O00267	SUPT5H	Transcription elongation factor SPT5, hSPT5, DRB sensitivity-inducing factor 160 kDa subunit, DSIF p160, DRB sensitivity-inducing factor large subunit, DSIF large subunit, Tat-cotransactivator 1 protein, Tat-CT1 protein	29	8.44585e+08
Q99996	Q99996	AKAP9	A-kinase anchor protein 9, AKAP-9, A-kinase anchor protein 350 kDa, AKAP 350, hgAKAP 350, A-kinase anchor protein 450 kDa, AKAP 450, AKAP 120-like protein, Centrosome- and Golgi-localized PKN-associated protein, CG-NAP, Protein hyperion, Protein kinase A-anchoring protein 9, PRKA9, Protein yotiao	10	0.00477937	0.004756	0.00560577	0.00477471	0.00475136	0.0056003	0.00169779	0.00148112	0.0021253	6.26442e-05	6.06749e-05	7.23559e-05	3.68975	4.09655	3.40451	3.73027	0.347798	0.57174					Q12849	Q12849	GRSF1	G-rich sequence factor 1, GRSF-1	21	3.44107	Yes		Q12965	Q12965	MYO1E	Unconventional myosin-Ie, Myosin-Ic, Unconventional myosin 1E	39	1.34914e+09	1.31645e+09	1.32691e+09		O00567	O00567	NOP56	Nucleolar protein 56, Nucleolar protein 5A	29	1.85572e+09
O00571	O00571	DDX3X	ATP-dependent RNA helicase DDX3X, 3.6.4.13, CAP-Rf, DEAD box protein 3, X-chromosomal, DEAD box, X isoform, DBX, Helicase-like protein 2, HLP2	3.93033	0.389711	0.370121	0.359177	0.365722	0.347338	0.337068	0.122772	0.111787	0.132804	0.00479828	0.00443551	0.00435492	3.90828	3.96784	3.2792	3.71844	0.381558	0.570361					P61247	P61247	RPS3A	40S ribosomal protein S3a, Small ribosomal subunit protein eS1, v-fos transformation effector protein, Fte-1	21	3.42975	Yes		P62917	P62917	RPL8	60S ribosomal protein L8, Large ribosomal subunit protein uL2	39	1.46817e+10	2.61909e+10	2.20508e+10		Q02878	Q02878	RPL6	60S ribosomal protein L6, Large ribosomal subunit protein eL6, Neoplasm-related protein C140, Tax-responsive enhancer element-binding protein 107, TaxREB107	29	5.9032e+09
Q9UPY3	Q9UPY3	DICER1	Endoribonuclease Dicer, 3.1.26.3, Helicase with RNase motif, Helicase MOI	3.72951	0.000664579	0.000825455	0.000657861	0.00061799	0.000767588	0.000611742	0.000230245	0.00019936	0.000291902	8.10803e-06	9.80209e-06	7.90371e-06	3.52147	4.91679	2.70766	3.71531	1.11725	0.569995					O95985	O95985	TOP3B	DNA topoisomerase 3-beta-1, 5.6.2.1, DNA topoisomerase III beta-1	21	3.26345	Yes		Q14103	Q14103	HNRNPD	Heterogeneous nuclear ribonucleoprotein D0, hnRNP D0, AU-rich element RNA-binding protein 1	39	6.19488e+09	6.66785e+09	4.68799e+09		Q2NL82	Q2NL82	TSR1	Pre-rRNA-processing protein TSR1 homolog	29	7.6255e+08
P51116	P51116	FXR2	RNA-binding protein FXR2, FXR2P, FMR1 autosomal homolog 2	4.88232	0.0144192	0.0158441	0.0166748	0.0139463	0.0153245	0.016128	0.00631497	0.00419568	0.00583755	0.000182976	0.000195694	0.000208374	2.89749	4.66418	3.56954	3.71041	0.891729	0.569421					Q9BZE1	Q9BZE1	MRPL37	39S ribosomal protein L37, mitochondrial, L37mt, MRP-L37, 39S ribosomal protein L2, mitochondrial, L2mt, MRP-L2, Mitochondrial large ribosomal subunit protein mL37	21	2.91423	Yes		Q14697	Q14697	GANAB	Neutral alpha-glucosidase AB, 3.2.1.207, Alpha-glucosidase 2, Glucosidase II subunit alpha	39	3.86901e+09	2.55825e+09	3.76786e+09		P31943	P31943	HNRNPH1	Heterogeneous nuclear ribonucleoprotein H, hnRNP H	28	8.24094e+10
Q5BKZ1	Q5BKZ1	ZNF326	DBIRD complex subunit ZNF326, Zinc finger protein 326, Zinc finger protein interacting with mRNPs and DBC1	4.05162	0.0637894	0.0615954	0.07146	0.0601615	0.0580922	0.0673958	0.0209606	0.0238979	0.0205192	0.000789319	0.000741838	0.000870754	3.76572	3.10419	4.24361	3.70451	0.572167	0.56873					Q14151	Q14151	SAFB2	Scaffold attachment factor B2, SAF-B2	21	2.60691	Yes		Q13428	Q13428	TCOF1	Treacle protein, Treacher Collins syndrome protein	39	1.92177e+09	2.42358e+09	1.72838e+09		Q96EP5	Q96EP5	DAZAP1	DAZ-associated protein 1, Deleted in azoospermia-associated protein 1	28	1.22103e+10
O75494	O75494	SRSF10	Serine/arginine-rich splicing factor 10, 40 kDa SR-repressor protein, SRrp40, FUS-interacting serine-arginine-rich protein 1, Splicing factor SRp38, Splicing factor, arginine/serine-rich 13A, TLS-associated protein with Ser-Arg repeats, TASR, TLS-associated protein with SR repeats, TLS-associated serine-arginine protein, TLS-associated SR protein	2.6966	0.0318587	0.0381188	0.0378961	0.0276011	0.0330246	0.0328317	0.0107244	0.0103217	0.0116828	0.000362126	0.000421724	0.000424185	3.37665	4.08579	3.63084	3.69776	0.359274	0.567938					Q9Y2W1	Q9Y2W1	THRAP3	Thyroid hormone receptor-associated protein 3, BCLAF1 and THRAP3 family member 2, Thyroid hormone receptor-associated protein complex 150 kDa component, Trap150	21	1.90665	Yes		P04083	P04083	ANXA1	Annexin A1, Annexin I, Annexin-1, Calpactin II, Calpactin-2, Chromobindin-9, Lipocortin I, Phospholipase A2 inhibitory protein, p35	39	5.27899e+09	3.45253e+09	4.68768e+09		P35637	P35637	FUS	RNA-binding protein FUS, 75 kDa DNA-pairing protein, Oncogene FUS, Oncogene TLS, POMp75, Translocated in liposarcoma protein	28	2.47309e+10
Q6PKG0	Q6PKG0	LARP1	La-related protein 1, La ribonucleoprotein domain family member 1	3.56044	0.0694537	0.0696227	0.0840882	0.0640267	0.0641825	0.0775177	0.0272504	0.021681	0.0252272	0.00084003	0.00081961	0.00100153	3.08264	3.78031	3.97004	3.611	0.467301	0.557627					Q8N3C0	Q8N3C0	ASCC3	Activating signal cointegrator 1 complex subunit 3, 3.6.4.12, ASC-1 complex subunit p200, ASC1p200, Helicase, ATP binding 1, Trip4 complex subunit p200	21	1.75941	Yes		P49411	P49411	TUFM	Elongation factor Tu, mitochondrial, EF-Tu, P43	39	5.82187e+09	5.26226e+09	5.10365e+09		Q9NWH9	Q9NWH9	SLTM	SAFB-like transcription modulator, Modulator of estrogen-induced transcription	28	9.29145e+08
Q96EY7	Q96EY7	PTCD3	Pentatricopeptide repeat domain-containing protein 3, mitochondrial, 28S ribosomal protein S39, mitochondrial, MRP-S39, Mitochondrial small ribosomal subunit protein mS39, Transformation-related gene 15 protein, TRG-15	3.18842	0.0807431	0.053722	0.0791571	0.0727615	0.0484115	0.0713323	0.0243274	0.0282888	0.0198172	0.000954631	0.000618214	0.000921613	3.92411	2.18536	4.65058	3.58668	1.26677	0.554693					Q14966	Q14966	ZNF638	Zinc finger protein 638, Cutaneous T-cell lymphoma-associated antigen se33-1, CTCL-associated antigen se33-1, Nuclear protein 220, Zinc finger matrin-like protein	21	0.828418	Yes		P00338	P00338	LDHA	L-lactate dehydrogenase A chain, LDH-A, 1.1.1.27, Cell proliferation-inducing gene 19 protein, LDH muscle subunit, LDH-M, Renal carcinoma antigen NY-REN-59	39	3.57476e+10	3.19168e+10	3.47493e+10		Q9H7B2	Q9H7B2	RPF2	Ribosome production factor 2 homolog, Brix domain-containing protein 1, Ribosome biogenesis protein RPF2 homolog	28	1.46851e+09
Q9H6S0	Q9H6S0	YTHDC2	3'-5' RNA helicase YTHDC2, 3.6.4.13, YTH domain-containing protein 2, hYTHDC2	2.44984	0.0207794	0.020272	0.0180377	0.0175645	0.0171357	0.015247	0.00576482	0.00636512	0.00606027	0.000230446	0.000218822	0.000196992	3.99746	3.43784	3.25054	3.56195	0.388617	0.551687					P49748	P49748	ACADVL	Very long-chain specific acyl-CoA dehydrogenase, mitochondrial, VLCAD, 1.3.8.9	21	0.279389	Yes		P23921	P23921	RRM1	Ribonucleoside-diphosphate reductase large subunit, 1.17.4.1, Ribonucleoside-diphosphate reductase subunit M1, Ribonucleotide reductase large subunit	39	2.55639e+09	1.70616e+09	2.38285e+09		P62753	P62753	RPS6	40S ribosomal protein S6, Phosphoprotein NP33, Small ribosomal subunit protein eS6	28	1.14966e+10
O75152	O75152	ZC3H11A	Zinc finger CCCH domain-containing protein 11A	3.60107	0.0118207	0.0112116	0.0146678	0.0109208	0.010358	0.0135511	0.00447937	0.0044962	0.0038717	0.000143281	0.000132271	0.00017508	3.19868	2.94185	4.52205	3.55419	0.84797	0.550741					P53396	P53396	ACLY	ATP-citrate synthase, 2.3.3.8, ATP-citrate (pro-S-)-lyase, ACL, Citrate cleavage enzyme	21	-1.7378	Yes		P55786	P55786	NPEPPS	Puromycin-sensitive aminopeptidase, PSA, 3.4.11.14, Cytosol alanyl aminopeptidase, AAP-S	39	2.10183e+09	1.40503e+09	1.79645e+09		Q8IY81	Q8IY81	FTSJ3	pre-rRNA 2'-O-ribose RNA methyltransferase FTSJ3, 2.1.1.-, Protein ftsJ homolog 3, Putative rRNA methyltransferase 3	28	1.68046e+09
Q96SI9	Q96SI9	STRBP	Spermatid perinuclear RNA-binding protein	3.38472	0.0108599	0.00991316	0.0113729	0.009911	0.00904699	0.0103792	0.00363265	0.00334122	0.00378683	0.000130032	0.00011553	0.000134099	3.57955	3.45772	3.54119	3.52615	0.0622916	0.547301					Q86YZ3	Q86YZ3	HRNR	Hornerin	21	-10	No		P60174	P60174	TPI1	Triosephosphate isomerase, TIM, 5.3.1.1, Methylglyoxal synthase, 4.2.3.3, Triose-phosphate isomerase	39	3.13071e+10	2.5165e+10	2.99546e+10		P40429	P40429	RPL13A	60S ribosomal protein L13a, 23 kDa highly basic protein, Large ribosomal subunit protein uL13	28	4.35199e+09
Q92576	Q92576	PHF3	PHD finger protein 3	4.29829	0.00135443	0.00132191	0.00142251	0.00128892	0.00125797	0.0013537	0.000474406	0.000387582	0.000618402	1.69106e-05	1.60643e-05	1.74898e-05	3.56459	4.14476	2.82823	3.51252	0.659806	0.545619					P14923	P14923	JUP	Junction plakoglobin, Catenin gamma, Desmoplakin III, Desmoplakin-3	21	-10	No		P12268	P12268	IMPDH2	Inosine-5'-monophosphate dehydrogenase 2, IMP dehydrogenase 2, IMPD 2, IMPDH 2, 1.1.1.205, Inosine-5'-monophosphate dehydrogenase type II, IMP dehydrogenase II, IMPDH-II	39	4.87354e+09	4.13026e+09	3.83476e+09		P62269	P62269	RPS18	40S ribosomal protein S18, Ke-3, Ke3, Small ribosomal subunit protein uS13	28	3.47157e+09
P41214	P41214	EIF2D	Eukaryotic translation initiation factor 2D, eIF2d, Hepatocellular carcinoma-associated antigen 56, Ligatin	5.32237	0.00484931	0.00442598	0.00417651	0.00473107	0.00431806	0.00407468	0.00170567	0.00153695	0.00162649	6.20716e-05	5.51417e-05	5.26448e-05	3.63914	3.58774	3.2367	3.48786	0.219022	0.542559					O14979	O14979	HNRNPDL	Heterogeneous nuclear ribonucleoprotein D-like, hnRNP D-like, hnRNP DL, AU-rich element RNA-binding factor, JKT41-binding protein, Protein laAUF1	20	7.48431	Yes		O14980	O14980	XPO1	Exportin-1, Exp1, Chromosome region maintenance 1 protein homolog	38	2.83649e+09	2.4934e+09	2.51407e+09		P27635	P27635	RPL10	60S ribosomal protein L10, Laminin receptor homolog, Large ribosomal subunit protein uL16, Protein QM, Ribosomal protein L10, Tumor suppressor QM	28	3.07132e+09
Q86TB9	Q86TB9	PATL1	Protein PAT1 homolog 1, PAT1-like protein 1, Protein PAT1 homolog b, Pat1b, hPat1b	4.00954	0.00329626	0.00297325	0.00347208	0.00310357	0.00279944	0.00326911	0.00175758	0.000732942	0.00131724	4.07188e-05	3.57488e-05	4.22369e-05	2.31676	4.87744	3.20647	3.46689	1.30005	0.53994					P62280	P62280	RPS11	40S ribosomal protein S11, Small ribosomal subunit protein uS17	20	4.66634	Yes		Q7Z6Z7	Q7Z6Z7	HUWE1	E3 ubiquitin-protein ligase HUWE1, 2.3.2.26, ARF-binding protein 1, ARF-BP1, HECT, UBA and WWE domain-containing protein 1, HECT-type E3 ubiquitin transferase HUWE1, Homologous to E6AP carboxyl terminus homologous protein 9, HectH9, Large structure of UREB1, LASU1, Mcl-1 ubiquitin ligase E3, Mule, Upstream regulatory element-binding protein 1, URE-B1, URE-binding protein 1	38	1.08975e+09	1.04654e+09	1.13712e+09		Q9H0A0	Q9H0A0	NAT10	RNA cytidine acetyltransferase, 2.3.1.-, 18S rRNA cytosine acetyltransferase, N-acetyltransferase 10, N-acetyltransferase-like protein, hALP	28	5.35536e+08
Q71RC2	Q71RC2	LARP4	La-related protein 4, La ribonucleoprotein domain family member 4	2.61618	0.0432742	0.0443757	0.0475263	0.037206	0.038153	0.0408618	0.0162817	0.0126793	0.0150418	0.000488142	0.000487213	0.000527934	2.9981	3.8426	3.50978	3.45016	0.425395	0.537839					P31483	P31483	TIA1	Cytotoxic granule associated RNA binding protein TIA1, Nucleolysin TIA-1 isoform p40, RNA-binding protein TIA-1, T-cell-restricted intracellular antigen-1, TIA-1, p40-TIA-1	20	4.58157	Yes		P35606	P35606	COPB2	Coatomer subunit beta', Beta'-coat protein, Beta'-COP, p102	38	2.09575e+09	1.62964e+09	1.88805e+09		P08670	P08670	VIM	Vimentin	28	1.53956e+09
Q9NR30	Q9NR30	DDX21	Nucleolar RNA helicase 2, 3.6.4.13, DEAD box protein 21, Gu-alpha, Nucleolar RNA helicase Gu, Nucleolar RNA helicase II, RH II/Gu	4.19877	0.514064	0.4857	0.481811	0.487516	0.460617	0.456929	0.17147	0.181349	0.175883	0.00639621	0.00588208	0.00590352	3.73022	3.24352	3.35651	3.44342	0.25472	0.536989					P05455	P05455	SSB	Lupus La protein, La autoantigen, La ribonucleoprotein, Sjoegren syndrome type B antigen, SS-B	20	4.5784	Yes		O95373	O95373	IPO7	Importin-7, Imp7, Ran-binding protein 7, RanBP7	38	4.72427e+09	4.19801e+09	3.88311e+09		P02751	P02751	FN1	Fibronectin, FN, Cold-insoluble globulin, CIG	28	2.34464e+09
Q15269	Q15269	PWP2	Periodic tryptophan protein 2 homolog	3.46815	0.0575281	0.0468407	0.0478492	0.0527606	0.0429589	0.0438838	0.0173723	0.0196134	0.0162213	0.000692219	0.000548585	0.000566979	3.98461	2.79699	3.49526	3.42562	0.596863	0.534739					O00541	O00541	PES1	Pescadillo homolog	20	4.05255	Yes		O00159	O00159	MYO1C	Unconventional myosin-Ic, Myosin I beta, MMI-beta, MMIb	38	1.33436e+09	1.26489e+09	1.31616e+09		Q9BYK8	Q9BYK8	HELZ2	Helicase with zinc finger domain 2, ATP-dependent helicase PRIC285, Helicase with zinc finger 2, transcriptional coactivator, PPAR-alpha-interacting complex protein 285, PPAR-gamma DNA-binding domain-interacting protein 1, PDIP1, PPAR-gamma DBD-interacting protein 1, Peroxisomal proliferator-activated receptor A-interacting complex 285 kDa protein, 3.6.4.-	27	4.62521e+08
Q12906	Q12906	ILF3	Interleukin enhancer-binding factor 3, Double-stranded RNA-binding protein 76, DRBP76, M-phase phosphoprotein 4, MPP4, Nuclear factor associated with dsRNA, NFAR, Nuclear factor of activated T-cells 90 kDa, NF-AT-90, Translational control protein 80, TCP80	2.50851	0.282885	0.269987	0.280736	0.240602	0.229632	0.238775	0.101455	0.0805896	0.0886923	0.0031567	0.0029324	0.00308497	3.11144	3.63869	3.47828	3.40947	0.270277	0.532687					Q5VYS8	Q5VYS8	TUT7	Terminal uridylyltransferase 7, TUTase 7, 2.7.7.52, Zinc finger CCHC domain-containing protein 6	20	3.80024	Yes		Q13200	Q13200	PSMD2	26S proteasome non-ATPase regulatory subunit 2, 26S proteasome regulatory subunit RPN1, 26S proteasome regulatory subunit S2, 26S proteasome subunit p97, Protein 55.11, Tumor necrosis factor type 1 receptor-associated protein 2	38	3.16251e+09	2.21734e+09	2.60171e+09		Q92804	Q92804	TAF15	TATA-binding protein-associated factor 2N, 68 kDa TATA-binding protein-associated factor, TAF(II)68, TAFII68, RNA-binding protein 56	27	6.54926e+09
Q9NYL2	Q9NYL2	MAP3K20	Mitogen-activated protein kinase kinase kinase 20, 2.7.11.25, Human cervical cancer suppressor gene 4 protein, HCCS-4, Leucine zipper- and sterile alpha motif-containing kinase, MLK-like mitogen-activated protein triple kinase, Mitogen-activated protein kinase kinase kinase MLT, Mixed lineage kinase 7, Mixed lineage kinase-related kinase, MLK-related kinase, MRK, Sterile alpha motif- and leucine …	2.2896	0.00295976	0.00343466	0.00300661	0.00245719	0.00285145	0.00249608	0.00114047	0.000818804	0.00112242	3.22383e-05	3.6413e-05	3.22494e-05	2.82675	4.4471	2.8732	3.38235	0.922392	0.529218					Q7Z478	Q7Z478	DHX29	ATP-dependent RNA helicase DHX29, 3.6.4.13, DEAH box protein 29, Nucleic acid helicase DDXx	20	3.70222	Yes		Q15397	Q15397	PUM3	Pumilio homolog 3, HBV X-transactivated gene 5 protein, HBV XAg-transactivated protein 5, Minor histocompatibility antigen HA-8, HLA-HA8	38	7.08108e+08	7.49038e+08	7.97026e+08		O43823	O43823	AKAP8	A-kinase anchor protein 8, AKAP-8, A-kinase anchor protein 95 kDa, AKAP 95	27	1.32539e+09
Q00341	Q00341	HDLBP	Vigilin, High density lipoprotein-binding protein, HDL-binding protein	3.5343	0.158273	0.155164	0.150518	0.145698	0.142836	0.138559	0.0604598	0.0476157	0.0577827	0.00191156	0.00182401	0.00179018	3.1617	3.83069	3.09812	3.3635	0.405842	0.526792					Q7Z417	Q7Z417	NUFIP2	FMR1-interacting protein NUFIP2, 82 kDa FMRP-interacting protein, 82-FIP, Cell proliferation-inducing gene 1 protein, FMRP-interacting protein 2, Nuclear FMR1-interacting protein 2	20	3.27224	Yes		Q9BUJ2	Q9BUJ2	HNRNPUL1	Heterogeneous nuclear ribonucleoprotein U-like protein 1, Adenovirus early region 1B-associated protein 5, E1B-55 kDa-associated protein 5, E1B-AP5	38	3.05555e+09	3.43676e+09	4.63696e+09		P09651	P09651	HNRNPA1	Heterogeneous nuclear ribonucleoprotein A1, hnRNP A1, Helix-destabilizing protein, Single-strand RNA-binding protein, hnRNP core protein A1	27	1.95837e+11
Q13057	Q13057	COASY	Bifunctional coenzyme A synthase, CoA synthase, NBP, POV-2, Phosphopantetheine adenylyltransferase, 2.7.7.3, Dephospho-CoA pyrophosphorylase, Pantetheine-phosphate adenylyltransferase, PPAT, Dephospho-CoA kinase, DPCK, 2.7.1.24, Dephosphocoenzyme A kinase, DPCOAK	2.78952	0.0445304	0.0409847	0.0343037	0.0389036	0.035806	0.0299692	0.0168124	0.0103119	0.0151296	0.000510415	0.000457242	0.000387202	3.03595	4.43412	2.55923	3.3431	0.974452	0.524149					O15226	O15226	NKRF	NF-kappa-B-repressing factor, NFkB-repressing factor, NRF, Protein ITBA4	20	2.83429	Yes		P49915	P49915	GMPS	GMP synthase [glutamine-hydrolyzing], 6.3.5.2, GMP synthetase, Glutamine amidotransferase	38	2.87771e+09	2.01358e+09	2.29189e+09		O95985	O95985	TOP3B	DNA topoisomerase 3-beta-1, 5.6.2.1, DNA topoisomerase III beta-1	27	5.18178e+08
O43159	O43159	RRP8	Ribosomal RNA-processing protein 8, 2.1.1.-, Cerebral protein 1, Nucleomethylin	3.73913	0.0164656	0.0172062	0.0165021	0.0153185	0.0160075	0.0153524	0.00584649	0.00574013	0.00656263	0.000200979	0.000204416	0.000198353	3.43759	3.56117	3.02247	3.34041	0.282194	0.5238					Q8IY81	Q8IY81	FTSJ3	pre-rRNA 2'-O-ribose RNA methyltransferase FTSJ3, 2.1.1.-, Protein ftsJ homolog 3, Putative rRNA methyltransferase 3	20	2.33501	Yes		Q92841	Q92841	DDX17	Probable ATP-dependent RNA helicase DDX17, 3.6.4.13, DEAD box protein 17, DEAD box protein p72, DEAD box protein p82, RNA-dependent helicase p72	38	3.48946e+09	2.68739e+09	2.95801e+09		Q9GZR7	Q9GZR7	DDX24	ATP-dependent RNA helicase DDX24, 3.6.4.13, DEAD box protein 24	27	1.20195e+09
Q92841	Q92841	DDX17	Probable ATP-dependent RNA helicase DDX17, 3.6.4.13, DEAD box protein 17, DEAD box protein p72, DEAD box protein p82, RNA-dependent helicase p72	4.3349	0.145879	0.146989	0.124534	0.138992	0.140049	0.118654	0.0597295	0.0459999	0.0506321	0.00182358	0.00178843	0.00153301	3.05306	3.88789	3.02775	3.3229	0.489464	0.521517					O76094	O76094	SRP72	Signal recognition particle subunit SRP72, SRP72, Signal recognition particle 72 kDa protein	20	1.87931	Yes		P55884	P55884	EIF3B	Eukaryotic translation initiation factor 3 subunit B, eIF3b, Eukaryotic translation initiation factor 3 subunit 9, Prt1 homolog, hPrt1, eIF-3-eta, eIF3 p110, eIF3 p116	37	3.08657e+09	2.61055e+09	2.73469e+09		O60832	O60832	DKC1	H/ACA ribonucleoprotein complex subunit DKC1, 5.4.99.-, CBF5 homolog, Dyskerin, Nopp140-associated protein of 57 kDa, Nucleolar protein NAP57, Nucleolar protein family A member 4, snoRNP protein DKC1	27	3.00243e+09
Q14152	Q14152	EIF3A	Eukaryotic translation initiation factor 3 subunit A, eIF3a, Eukaryotic translation initiation factor 3 subunit 10, eIF-3-theta, eIF3 p167, eIF3 p180, eIF3 p185	3.361	0.346257	0.329133	0.393234	0.315545	0.299941	0.358356	0.137653	0.11249	0.131857	0.00413995	0.00383024	0.00462996	3.00753	3.40495	3.51135	3.30794	0.265549	0.519558					Q9UPN3	Q9UPN3	MACF1	Microtubule-actin cross-linking factor 1, isoforms 1/2/3/4/5, 620 kDa actin-binding protein, ABP620, Actin cross-linking family protein 7, Macrophin-1, Trabeculin-alpha	20	0.99357	Yes		P38919	P38919	EIF4A3	Eukaryotic initiation factor 4A-III, eIF-4A-III, eIF4A-III, 3.6.4.13, ATP-dependent RNA helicase DDX48, ATP-dependent RNA helicase eIF4A-3, DEAD box protein 48, Eukaryotic initiation factor 4A-like NUK-34, Eukaryotic translation initiation factor 4A isoform 3, Nuclear matrix protein 265, NMP 265, hNMP 265	37	5.5997e+09	4.62036e+09	5.43339e+09		P18583	P18583	SON	Protein SON, Bax antagonist selected in saccharomyces 1, BASS1, Negative regulatory element-binding protein, NRE-binding protein, Protein DBP-5, SON3	27	1.16333e+09
Q14694	Q14694	USP10	Ubiquitin carboxyl-terminal hydrolase 10, 3.4.19.12, Deubiquitinating enzyme 10, Ubiquitin thioesterase 10, Ubiquitin-specific-processing protease 10	3.02411	0.0174525	0.0190574	0.0174107	0.015542	0.0169712	0.0155047	0.0069735	0.00628318	0.00578147	0.000203911	0.000216722	0.000200321	2.92408	3.44923	3.46488	3.2794	0.307815	0.515794					P11310	P11310	ACADM	Medium-chain specific acyl-CoA dehydrogenase, mitochondrial, 1.3.8.7	20	0.525253	Yes		P11413	P11413	G6PD	Glucose-6-phosphate 1-dehydrogenase, G6PD, 1.1.1.49	37	3.37254e+09	2.75992e+09	3.42212e+09		Q86UP2	Q86UP2	KTN1	Kinectin, CG-1 antigen, Kinesin receptor	27	3.83969e+08
Q8TDD1	Q8TDD1	DDX54	ATP-dependent RNA helicase DDX54, 3.6.4.13, ATP-dependent RNA helicase DP97, DEAD box RNA helicase 97 kDa, DEAD box protein 54	4.32082	0.124269	0.120274	0.115921	0.118347	0.114543	0.110397	0.0715352	0.0458829	0.0327534	0.00155272	0.00146271	0.00142633	2.17056	3.18792	4.35476	3.23775	1.09295	0.510243					P14618	P14618	PKM	Pyruvate kinase PKM, 2.7.1.40, Cytosolic thyroid hormone-binding protein, CTHBP, Opa-interacting protein 3, OIP-3, Pyruvate kinase 2/3, Pyruvate kinase muscle isozyme, Threonine-protein kinase PKM2, 2.7.11.1, Thyroid hormone-binding protein 1, THBP1, Tumor M2-PK, Tyrosine-protein kinase PKM2, 2.7.10.2, p58	20	-1.23972	Yes		Q9NYF8	Q9NYF8	BCLAF1	Bcl-2-associated transcription factor 1, Btf, BCLAF1 and THRAP3 family member 1	37	1.39208e+09	1.24987e+09	1.49419e+09		P63244	P63244	RACK1	Receptor of activated protein C kinase 1, Cell proliferation-inducing gene 21 protein, Guanine nucleotide-binding protein subunit beta-2-like 1, Guanine nucleotide-binding protein subunit beta-like protein 12.3, Human lung cancer oncogene 7 protein, HLC-7, Receptor for activated C kinase, Small ribosomal subunit protein RACK1	27	2.27059e+09
Q9UK61	Q9UK61	TASOR	Protein TASOR, CTCL tumor antigen se89-1, Retinoblastoma-associated protein RAP140, Transgene activation suppressor protein	1.89905	0.000552921	0.000534734	0.00149959	0.000436016	0.000421675	0.00118253	0.000280485	0.000263234	0.000273025	5.72054e-06	5.38479e-06	1.52782e-05	2.03951	2.04563	5.59591	3.22702	2.05152	0.508801					Q96QC0	Q96QC0	PPP1R10	Serine/threonine-protein phosphatase 1 regulatory subunit 10, MHC class I region proline-rich protein CAT53, PP1-binding protein of 114 kDa, Phosphatase 1 nuclear targeting subunit, Protein FB19, p99	19	5.37111	Yes		Q9NZI8	Q9NZI8	IGF2BP1	Insulin-like growth factor 2 mRNA-binding protein 1, IGF2 mRNA-binding protein 1, IMP-1, IMP1, Coding region determinant-binding protein, CRD-BP, IGF-II mRNA-binding protein 1, VICKZ family member 1, Zipcode-binding protein 1, ZBP-1	37	1.97991e+09	1.90398e+09	1.64088e+09		Q9Y5B9	Q9Y5B9	SUPT16H	FACT complex subunit SPT16, Chromatin-specific transcription elongation factor 140 kDa subunit, FACT 140 kDa subunit, FACTp140, Facilitates chromatin transcription complex subunit SPT16, hSPT16	27	6.55778e+08
Q01844	Q01844	EWSR1	RNA-binding protein EWS, EWS oncogene, Ewing sarcoma breakpoint region 1 protein	4.85169	0.0605931	0.0631467	0.0600143	0.0585648	0.0610329	0.0580054	0.0238972	0.0238579	0.0242772	0.00076837	0.00077939	0.00074943	3.21531	3.2668	3.08697	3.18969	0.0926069	0.503749					Q12926	Q12926	ELAVL2	ELAV-like protein 2, ELAV-like neuronal protein 1, Hu-antigen B, HuB, Nervous system-specific RNA-binding protein Hel-N1	19	4.50733	Yes		P41091	P41091	EIF2S3	Eukaryotic translation initiation factor 2 subunit 3, 3.6.5.3, Eukaryotic translation initiation factor 2 subunit gamma X, eIF-2-gamma X, eIF-2gX	37	6.70321e+09	6.0719e+09	5.89457e+09		P08238	P08238	HSP90AB1	Heat shock protein HSP 90-beta, HSP 90, Heat shock 84 kDa, HSP 84, HSP84	27	5.58832e+09
Q13283	Q13283	G3BP1	Ras GTPase-activating protein-binding protein 1, G3BP-1, 3.6.4.12, 3.6.4.13, ATP-dependent DNA helicase VIII, hDH VIII, GAP SH3 domain-binding protein 1	5.07124	0.136117	0.134192	0.138333	0.132185	0.130316	0.134337	0.0584356	0.0495346	0.0542052	0.00173426	0.00166413	0.00173563	2.96782	3.35954	3.20196	3.17644	0.197102	0.501941					Q8IWZ3	Q8IWZ3	ANKHD1	Ankyrin repeat and KH domain-containing protein 1, HIV-1 Vpr-binding ankyrin repeat protein, Multiple ankyrin repeats single KH domain, hMASK	19	4.41391	Yes		Q96GQ7	Q96GQ7	DDX27	Probable ATP-dependent RNA helicase DDX27, 3.6.4.13, DEAD box protein 27	37	1.43172e+09	1.48282e+09	1.37821e+09		Q8NDT2	Q8NDT2	RBM15B	Putative RNA-binding protein 15B, One-twenty two protein 3, HsOTT3, HuOTT3, RNA-binding motif protein 15B	26	1.3668e+09
Q9H000	Q9H000	MKRN2	E3 ubiquitin-protein ligase makorin-2, 2.3.2.27, RING finger protein 62, RING-type E3 ubiquitin transferase makorin-2	6.15279	0.00144883	0.00124339	0.00112428	0.00142875	0.00122615	0.0011087	0.000544363	0.000429633	0.000587503	1.87452e-05	1.5658e-05	1.43244e-05	3.44351	3.6445	2.43819	3.1754	0.646304	0.501798					P78332	P78332	RBM6	RNA-binding protein 6, Lung cancer antigen NY-LU-12, Protein G16, RNA-binding motif protein 6, RNA-binding protein DEF-3	19	4.09817	Yes		P62280	P62280	RPS11	40S ribosomal protein S11, Small ribosomal subunit protein uS17	37	1.13638e+10	1.27571e+10	1.34733e+10		P62847	P62847	RPS24	40S ribosomal protein S24, Small ribosomal subunit protein eS24	26	1.15795e+10
P36578	P36578	RPL4	60S ribosomal protein L4, 60S ribosomal protein L1, Large ribosomal subunit protein uL4	3.12229	0.977903	0.978119	0.964249	0.877168	0.877362	0.864921	0.318297	0.405525	0.355971	0.0115084	0.0112039	0.0111748	3.61564	2.76282	3.13924	3.17256	0.427386	0.50141					P63244	P63244	RACK1	Receptor of activated protein C kinase 1, Cell proliferation-inducing gene 21 protein, Guanine nucleotide-binding protein subunit beta-2-like 1, Guanine nucleotide-binding protein subunit beta-like protein 12.3, Human lung cancer oncogene 7 protein, HLC-7, Receptor for activated C kinase, Small ribosomal subunit protein RACK1	19	3.43429	Yes		O43175	O43175	PHGDH	D-3-phosphoglycerate dehydrogenase, 3-PGDH, 1.1.1.95, 2-oxoglutarate reductase, 1.1.1.399, Malate dehydrogenase, 1.1.1.37	37	1.3316e+10	1.0704e+10	1.22206e+10		Q9BZE1	Q9BZE1	MRPL37	39S ribosomal protein L37, mitochondrial, L37mt, MRP-L37, 39S ribosomal protein L2, mitochondrial, L2mt, MRP-L2, Mitochondrial large ribosomal subunit protein mL37	26	1.90488e+09
Q14151	Q14151	SAFB2	Scaffold attachment factor B2, SAF-B2	2.60691	0.0194349	0.0203572	0.0211359	0.0166945	0.0174868	0.0181556	0.00645854	0.00696884	0.00803843	0.000219031	0.000223306	0.00023457	3.39134	3.20435	2.91811	3.17127	0.238343	0.501233					O00567	O00567	NOP56	Nucleolar protein 56, Nucleolar protein 5A	19	3.23579	Yes		Q14978	Q14978	NOLC1	Nucleolar and coiled-body phosphoprotein 1, 140 kDa nucleolar phosphoprotein, Nopp140, Hepatitis C virus NS5A-transactivated protein 13, HCV NS5A-transactivated protein 13, Nucleolar 130 kDa protein, Nucleolar phosphoprotein p130	37	5.80677e+09	7.73858e+09	6.51726e+09		Q8WTT2	Q8WTT2	NOC3L	Nucleolar complex protein 3 homolog, NOC3 protein homolog, Factor for adipocyte differentiation 24, NOC3-like protein, Nucleolar complex-associated protein 3-like protein	26	1.41448e+09
Q15366	Q15366	PCBP2	Poly(rC)-binding protein 2, Alpha-CP2, Heterogeneous nuclear ribonucleoprotein E2, hnRNP E2	4.4989	0.122847	0.123416	0.0971592	0.117644	0.118189	0.093044	0.0506804	0.0398855	0.0454274	0.00154349	0.00150927	0.00120213	3.04553	3.78402	2.64626	3.1586	0.577242	0.499495					P67809	P67809	YBX1	Y-box-binding protein 1, YB-1, CCAAT-binding transcription factor I subunit A, CBF-A, DNA-binding protein B, DBPB, Enhancer factor I subunit A, EFI-A, Nuclease-sensitive element-binding protein 1, Y-box transcription factor	19	3.0402	Yes		Q9Y4C8	Q9Y4C8	RBM19	Probable RNA-binding protein 19, RNA-binding motif protein 19	37	2.04923e+09	1.89037e+09	1.2513e+09		O60287	O60287	URB1	Nucleolar pre-ribosomal-associated protein 1, Nucleolar protein 254 kDa, URB1 ribosome biogenesis 1 homolog	26	5.48756e+08
P11940	P11940	PABPC1	Polyadenylate-binding protein 1, PABP-1, Poly(A)-binding protein 1	3.94498	0.498491	0.575059	0.610466	0.468098	0.539997	0.573246	0.225273	0.211038	0.215635	0.00614145	0.00689576	0.00740634	2.72623	3.26755	3.43467	3.14281	0.370324	0.497319					O43823	O43823	AKAP8	A-kinase anchor protein 8, AKAP-8, A-kinase anchor protein 95 kDa, AKAP 95	19	2.81498	Yes		Q86UP2	Q86UP2	KTN1	Kinectin, CG-1 antigen, Kinesin receptor	37	1.22102e+09	8.09052e+08	9.15832e+08		Q9Y2X3	Q9Y2X3	NOP58	Nucleolar protein 58, Nucleolar protein 5	26	1.44804e+09
Q8WWM7	Q8WWM7	ATXN2L	Ataxin-2-like protein, Ataxin-2 domain protein, Ataxin-2-related protein	4.73119	0.0200181	0.0206649	0.0244437	0.0192918	0.0199151	0.0235567	0.0111674	0.00656877	0.00947626	0.000253108	0.000254315	0.000304353	2.26649	3.87158	3.21175	3.11661	0.806765	0.493682					Q71RC2	Q71RC2	LARP4	La-related protein 4, La ribonucleoprotein domain family member 4	19	2.61618	Yes		P06576	P06576	ATP5F1B	ATP synthase subunit beta, mitochondrial, 7.1.2.2, ATP synthase F1 subunit beta	37	1.00561e+10	6.65385e+09	7.99049e+09		Q9BXP5	Q9BXP5	SRRT	Serrate RNA effector molecule homolog, Arsenite-resistance protein 2	26	8.44808e+08
O76021	O76021	RSL1D1	Ribosomal L1 domain-containing protein 1, CATX-11, Cellular senescence-inhibited gene protein, Protein PBK1	4.95474	0.248629	0.247061	0.260697	0.240862	0.239343	0.252554	0.0922704	0.119049	0.0985236	0.00316012	0.00305641	0.00326299	3.42484	2.56735	3.31189	3.10136	0.465903	0.491552					Q9NYY8	Q9NYY8	FASTKD2	FAST kinase domain-containing protein 2, mitochondrial	19	2.45976	Yes		Q92878	Q92878	RAD50	DNA repair protein RAD50, hRAD50, 3.6.-.-	37	8.72711e+08	7.10826e+08	7.51444e+08		Q14978	Q14978	NOLC1	Nucleolar and coiled-body phosphoprotein 1, 140 kDa nucleolar phosphoprotein, Nopp140, Hepatitis C virus NS5A-transactivated protein 13, HCV NS5A-transactivated protein 13, Nucleolar 130 kDa protein, Nucleolar phosphoprotein p130	26	1.20684e+09
O15234	O15234	CASC3	Protein CASC3, Cancer susceptibility candidate gene 3 protein, Metastatic lymph node gene 51 protein, MLN 51, Protein barentsz, Btz	10	0.00288858	0.00380374	0.00418857	0.00288576	0.00380003	0.00418448	0.0016376	0.00136966	0.00157199	3.78612e-05	4.85264e-05	5.40635e-05	2.31199	3.54294	3.43918	3.09804	0.682709	0.491087					P25705	P25705	ATP5F1A	ATP synthase subunit alpha, mitochondrial, ATP synthase F1 subunit alpha	19	0.526803	Yes		Q13310	Q13310	PABPC4	Polyadenylate-binding protein 4, PABP-4, Poly(A)-binding protein 4, Activated-platelet protein 1, APP-1, Inducible poly(A)-binding protein, iPABP	37	5.68481e+09	5.74404e+09	5.79885e+09		O95758	O95758	PTBP3	Polypyrimidine tract-binding protein 3, Regulator of differentiation 1, Rod1	25	3.52428e+09
Q86U38	Q86U38	NOP9	Nucleolar protein 9	0.843194	0.0100635	0.00943043	0.00961983	0.00646168	0.00605521	0.00617682	0.00252003	0.00287218	0.00250196	8.47773e-05	7.7325e-05	7.98045e-05	3.36413	2.6922	3.18968	3.08201	0.348666	0.488833					Q6UB35	Q6UB35	MTHFD1L	Monofunctional C1-tetrahydrofolate synthase, mitochondrial, 6.3.4.3, Formyltetrahydrofolate synthetase	19	0.0930657	Yes		Q9NZB2	Q9NZB2	FAM120A	Constitutive coactivator of PPAR-gamma-like protein 1, Oxidative stress-associated Src activator, Protein FAM120A	37	1.32201e+09	1.45267e+09	1.6647e+09		Q16629	Q16629	SRSF7	Serine/arginine-rich splicing factor 7, Splicing factor 9G8, Splicing factor, arginine/serine-rich 7	25	1.65064e+10
Q01130	Q01130	SRSF2	Serine/arginine-rich splicing factor 2, Protein PR264, Splicing component, 35 kDa, Splicing factor SC35, SC-35, Splicing factor, arginine/serine-rich 2	5.82783	0.0939982	0.126836	0.102876	0.092372	0.124641	0.101096	0.0407526	0.0494411	0.0433902	0.00121192	0.00159167	0.00130616	2.97385	3.21933	3.01027	3.06781	0.132472	0.486829					Q2NL82	Q2NL82	TSR1	Pre-rRNA-processing protein TSR1 homolog	19	-0.911682	Yes		P33993	P33993	MCM7	DNA replication licensing factor MCM7, 3.6.4.12, CDC47 homolog, P1.1-MCM3	37	2.16618e+09	1.79495e+09	2.17022e+09		P47914	P47914	RPL29	60S ribosomal protein L29, Cell surface heparin-binding protein HIP, Large ribosomal subunit protein eL29	25	1.5413e+10
Q9C0J8	Q9C0J8	WDR33	pre-mRNA 3' end processing protein WDR33, WD repeat-containing protein 33, WD repeat-containing protein of 146 kDa	2.3031	0.0129774	0.0117426	0.0125814	0.0107909	0.00976409	0.0104616	0.00525911	0.00364143	0.00444075	0.000141576	0.000124687	0.000135164	2.69202	3.42413	3.04372	3.05329	0.366151	0.484768					Q9H0A0	Q9H0A0	NAT10	RNA cytidine acetyltransferase, 2.3.1.-, 18S rRNA cytosine acetyltransferase, N-acetyltransferase 10, N-acetyltransferase-like protein, hALP	19	-1.29704	Yes		P51991	P51991	HNRNPA3	Heterogeneous nuclear ribonucleoprotein A3, hnRNP A3	36	8.00266e+09	1.21322e+10	8.30803e+09		Q7Z417	Q7Z417	NUFIP2	FMR1-interacting protein NUFIP2, 82 kDa FMRP-interacting protein, 82-FIP, Cell proliferation-inducing gene 1 protein, FMRP-interacting protein 2, Nuclear FMR1-interacting protein 2	25	1.26224e+09
P05455	P05455	SSB	Lupus La protein, La autoantigen, La ribonucleoprotein, Sjoegren syndrome type B antigen, SS-B	4.5784	0.0656739	0.0803968	0.0971444	0.0630355	0.0771669	0.0932416	0.0316313	0.0346731	0.0327886	0.000827025	0.000985421	0.00120468	2.61458	2.84203	3.67408	3.04357	0.557761	0.483383					Q5T6F2	Q5T6F2	UBAP2	Ubiquitin-associated protein 2, UBAP-2, RNA polymerase II degradation factor UBAP2	18	5.18769	Yes		P58107	P58107	EPPK1	Epiplakin, 450 kDa epidermal antigen	36	4.44422e+09	4.49397e+09	3.37681e+09		Q13895	Q13895	BYSL	Bystin	25	8.74967e+08
Q8IWZ3	Q8IWZ3	ANKHD1	Ankyrin repeat and KH domain-containing protein 1, HIV-1 Vpr-binding ankyrin repeat protein, Multiple ankyrin repeats single KH domain, hMASK	4.41391	0.00585241	0.00611913	0.0060948	0.00559017	0.00584493	0.00582169	0.00249088	0.00218602	0.00271905	7.3343e-05	7.46398e-05	7.52162e-05	2.94447	3.41441	2.76627	3.04171	0.334836	0.483118					Q12905	Q12905	ILF2	Interleukin enhancer-binding factor 2, Nuclear factor of activated T-cells 45 kDa	18	4.74542	Yes		Q15021	Q15021	NCAPD2	Condensin complex subunit 1, Chromosome condensation-related SMC-associated protein 1, Chromosome-associated protein D2, hCAP-D2, Non-SMC condensin I complex subunit D2, XCAP-D2 homolog	36	1.43487e+09	1.07568e+09	1.14403e+09		Q9NVP1	Q9NVP1	DDX18	ATP-dependent RNA helicase DDX18, 3.6.4.13, DEAD box protein 18, Myc-regulated DEAD box protein, MrDb	25	1.11796e+09
Q99590	Q99590	SCAF11	Protein SCAF11, CTD-associated SR protein 11, Renal carcinoma antigen NY-REN-40, SC35-interacting protein 1, SR-related and CTD-associated factor 11, SRSF2-interacting protein, Serine/arginine-rich splicing factor 2-interacting protein, Splicing factor, arginine/serine-rich 2-interacting protein, Splicing regulatory protein 129, SRrp129	4.28984	0.00655162	0.00670066	0.00798106	0.00623297	0.00637476	0.00759288	0.00301327	0.00293081	0.00270806	8.17765e-05	8.14056e-05	9.81e-05	2.71388	2.77758	3.62253	3.038	0.507219	0.482587					O95758	O95758	PTBP3	Polypyrimidine tract-binding protein 3, Regulator of differentiation 1, Rod1	18	4.24229	Yes		P41250	P41250	GARS1	Glycine--tRNA ligase, 6.1.1.14, Diadenosine tetraphosphate synthetase, Ap4A synthetase, 2.7.7.-, Glycyl-tRNA synthetase, GlyRS, Glycyl-tRNA synthetase 1	36	3.12101e+09	2.29949e+09	2.49247e+09		Q9UG63	Q9UG63	ABCF2	ATP-binding cassette sub-family F member 2, Iron-inhibited ABC transporter 2	25	1.1513e+09
P50914	P50914	RPL14	60S ribosomal protein L14, CAG-ISL 7, Large ribosomal subunit protein eL14	4.63482	0.287583	0.272351	0.29504	0.276455	0.261813	0.283624	0.101607	0.121094	0.132419	0.0036271	0.00334335	0.00366442	3.56972	2.76096	2.76729	3.03266	0.465123	0.481823					Q8N1G4	Q8N1G4	LRRC47	Leucine-rich repeat-containing protein 47	18	4.15924	Yes		Q14444	Q14444	CAPRIN1	Caprin-1, Cell cycle-associated protein 1, Cytoplasmic activation- and proliferation-associated protein 1, GPI-anchored membrane protein 1, GPI-anchored protein p137, GPI-p137, p137GPI, Membrane component chromosome 11 surface marker 1, RNA granule protein 105	36	3.75942e+09	3.23602e+09	4.06897e+09		Q7L014	Q7L014	DDX46	Probable ATP-dependent RNA helicase DDX46, 3.6.4.13, DEAD box protein 46, PRP5 homolog	25	8.76503e+08
Q7L2E3	Q7L2E3	DHX30	ATP-dependent RNA helicase DHX30, 3.6.4.13, DEAH box protein 30	1.76289	0.11331	0.109376	0.0978434	0.0875211	0.0844823	0.0755747	0.0362995	0.035974	0.0336405	0.00114828	0.00107884	0.000976425	3.16334	2.99894	2.90253	3.0216	0.131876	0.480237					Q9H2U1	Q9H2U1	DHX36	ATP-dependent DNA/RNA helicase DHX36, 3.6.4.12, 3.6.4.13, DEAD/H box polypeptide 36, DEAH-box protein 36, G4-resolvase-1, G4R1, MLE-like protein 1, RNA helicase associated with AU-rich element protein	18	3.75899	Yes		P24928	P24928	POLR2A	DNA-directed RNA polymerase II subunit RPB1, RNA polymerase II subunit B1, 2.7.7.6, DNA-directed RNA polymerase II subunit A, DNA-directed RNA polymerase III largest subunit, RNA-directed RNA polymerase II subunit RPB1, 2.7.7.48	36	7.17504e+08	3.9621e+08	6.59585e+08		Q7L0Y3	Q7L0Y3	TRMT10C	tRNA methyltransferase 10 homolog C, HBV pre-S2 trans-regulated protein 2, Mitochondrial ribonuclease P protein 1, Mitochondrial RNase P protein 1, RNA (guanine-9-)-methyltransferase domain-containing protein 1, Renal carcinoma antigen NY-REN-49, mRNA methyladenosine-N(1)-methyltransferase, 2.1.1.-, tRNA (adenine(9)-N(1))-methyltransferase, 2.1.1.218, tRNA (guanine(9)-N(1))-methyltransferase, 2.1…	25	7.36623e+08
Q9ULW3	Q9ULW3	ABT1	Activator of basal transcription 1, hABT1, Basal transcriptional activator	6.57644	0.00589327	0.00488032	0.00599292	0.00583216	0.00482971	0.00593078	0.00274621	0.00246031	0.00205178	7.65179e-05	6.16754e-05	7.66257e-05	2.78631	2.50682	3.73459	3.00924	0.643529	0.478456					Q96EY7	Q96EY7	PTCD3	Pentatricopeptide repeat domain-containing protein 3, mitochondrial, 28S ribosomal protein S39, mitochondrial, MRP-S39, Mitochondrial small ribosomal subunit protein mS39, Transformation-related gene 15 protein, TRG-15	18	3.18842	Yes		Q13823	Q13823	GNL2	Nucleolar GTP-binding protein 2, Autoantigen NGP-1	36	9.9051e+08	9.98227e+08	1.12052e+09		P42696	P42696	RBM34	RNA-binding protein 34, RNA-binding motif protein 34	25	1.34066e+09
Q92615	Q92615	LARP4B	La-related protein 4B, La ribonucleoprotein domain family member 4B, La ribonucleoprotein domain family member 5, La-related protein 5	3.80219	0.00826834	0.00826099	0.00725187	0.00771527	0.00770842	0.0067668	0.00329173	0.00309459	0.00333876	0.000101224	9.84365e-05	8.7427e-05	3.07511	3.18092	2.61855	2.95819	0.29886	0.471026					Q9BXJ9	Q9BXJ9	NAA15	N-alpha-acetyltransferase 15, NatA auxiliary subunit, Gastric cancer antigen Ga19, N-terminal acetyltransferase, NMDA receptor-regulated protein 1, Protein tubedown-1, Tbdn100	18	2.5128	Yes		P16435	P16435	POR	NADPH--cytochrome P450 reductase, CPR, P450R, 1.6.2.4	36	3.53608e+09	2.96709e+09	3.18913e+09		Q9HAV4	Q9HAV4	XPO5	Exportin-5, Exp5, Ran-binding protein 21	25	4.45903e+08
Q15637	Q15637	SF1	Splicing factor 1, Mammalian branch point-binding protein, BBP, mBBP, Transcription factor ZFM1, Zinc finger gene in MEN1 locus, Zinc finger protein 162	3.35111	0.0317126	0.0343807	0.0339937	0.0288822	0.0313122	0.0309597	0.0139462	0.011035	0.0160867	0.000378935	0.000399857	0.0004	2.71713	3.62352	2.48653	2.94239	0.601038	0.4687					Q86UP2	Q86UP2	KTN1	Kinectin, CG-1 antigen, Kinesin receptor	18	2.48044	Yes		P25205	P25205	MCM3	DNA replication licensing factor MCM3, 3.6.4.12, DNA polymerase alpha holoenzyme-associated protein P1, P1-MCM3, RLF subunit beta, p102	36	2.37351e+09	1.864e+09	1.99995e+09		P46781	P46781	RPS9	40S ribosomal protein S9, Small ribosomal subunit protein uS4	25	2.80568e+09
Q96QD9	Q96QD9	FYTTD1	UAP56-interacting factor, Forty-two-three domain-containing protein 1, Protein 40-2-3	3.5266	0.000452673	0.000417116	0.000401472	0.00041653	0.000383811	0.000369416	0.000197724	0.000221822	0.00012495	5.46487e-06	4.90127e-06	4.77286e-06	2.76388	2.20955	3.81982	2.93108	0.818054	0.467028					P06748	P06748	NPM1	Nucleophosmin, NPM, Nucleolar phosphoprotein B23, Nucleolar protein NO38, Numatrin	18	2.42323	Yes		P40939	P40939	HADHA	Trifunctional enzyme subunit alpha, mitochondrial, 78 kDa gastrin-binding protein, Monolysocardiolipin acyltransferase, 2.3.1.-, TP-alpha, Long-chain enoyl-CoA hydratase, 4.2.1.17, Long chain 3-hydroxyacyl-CoA dehydrogenase, 1.1.1.211	36	1.84227e+09	1.44623e+09	1.59972e+09		P62701	P62701	RPS4X	40S ribosomal protein S4, X isoform, SCR10, Single copy abundant mRNA protein, Small ribosomal subunit protein eS4	25	2.2603e+09
Q13247	Q13247	SRSF6	Serine/arginine-rich splicing factor 6, Pre-mRNA-splicing factor SRP55, Splicing factor, arginine/serine-rich 6	3.75277	0.237956	0.238237	0.241995	0.221523	0.221785	0.225283	0.0874284	0.111029	0.101075	0.00290638	0.00283219	0.00291066	3.3243	2.55085	2.87971	2.91829	0.388166	0.465128					Q9NVP1	Q9NVP1	DDX18	ATP-dependent RNA helicase DDX18, 3.6.4.13, DEAD box protein 18, Myc-regulated DEAD box protein, MrDb	18	1.96993	Yes		Q7KZ85	Q7KZ85	SUPT6H	Transcription elongation factor SPT6, hSPT6, Histone chaperone suppressor of Ty6, Tat-cotransactivator 2 protein, Tat-CT2 protein	36	4.27483e+08	3.43524e+08	4.50491e+08		P14618	P14618	PKM	Pyruvate kinase PKM, 2.7.1.40, Cytosolic thyroid hormone-binding protein, CTHBP, Opa-interacting protein 3, OIP-3, Pyruvate kinase 2/3, Pyruvate kinase muscle isozyme, Threonine-protein kinase PKM2, 2.7.11.1, Thyroid hormone-binding protein 1, THBP1, Tumor M2-PK, Tyrosine-protein kinase PKM2, 2.7.10.2, p58	25	1.32471e+09
Q9NVU7	Q9NVU7	SDAD1	Protein SDA1 homolog, Nucleolar protein 130, SDA1 domain-containing protein 1, hSDA	3.16408	0.00652518	0.00730719	0.00604834	0.00587028	0.00657381	0.0054413	0.0021749	0.0031213	0.00288708	7.70181e-05	8.39475e-05	7.03016e-05	3.54123	2.6895	2.43504	2.88859	0.579344	0.460686					Q9UG63	Q9UG63	ABCF2	ATP-binding cassette sub-family F member 2, Iron-inhibited ABC transporter 2	18	1.95125	Yes		P62424	P62424	RPL7A	60S ribosomal protein L7a, Large ribosomal subunit protein eL8, PLA-X polypeptide, Surfeit locus protein 3	36	1.63956e+10	2.11505e+10	1.80793e+10		Q8TB72	Q8TB72	PUM2	Pumilio homolog 2, Pumilio-2	24	1.62448e+09
P62280	P62280	RPS11	40S ribosomal protein S11, Small ribosomal subunit protein uS17	4.66634	0.514757	0.446235	0.509346	0.495253	0.429327	0.490047	0.194516	0.218363	0.230622	0.00649772	0.00548251	0.00633141	3.34045	2.51073	2.74536	2.86552	0.427713	0.457203					A5YKK6	A5YKK6	CNOT1	CCR4-NOT transcription complex subunit 1, CCR4-associated factor 1, Negative regulator of transcription subunit 1 homolog, NOT1H, hNOT1	18	1.63677	Yes		P27824	P27824	CANX	Calnexin, IP90, Major histocompatibility complex class I antigen-binding protein p88, p90	36	4.8975e+09	3.34436e+09	3.48892e+09		P49207	P49207	RPL34	60S ribosomal protein L34, Large ribosomal subunit protein eL34	24	3.22973e+10
Q9NYF8	Q9NYF8	BCLAF1	Bcl-2-associated transcription factor 1, Btf, BCLAF1 and THRAP3 family member 1	2.3156	0.0566223	0.0587221	0.0712981	0.0471507	0.0488992	0.0593716	0.0238285	0.0213939	0.0255759	0.000618617	0.000624443	0.000767081	2.59613	2.91879	2.99923	2.83805	0.213336	0.45302					O75694	O75694	NUP155	Nuclear pore complex protein Nup155, 155 kDa nucleoporin, Nucleoporin Nup155	18	0.0921787	Yes		Q14566	Q14566	MCM6	DNA replication licensing factor MCM6, 3.6.4.12, p105MCM	36	2.16737e+09	1.90861e+09	1.92856e+09		Q12926	Q12926	ELAVL2	ELAV-like protein 2, ELAV-like neuronal protein 1, Hu-antigen B, HuB, Nervous system-specific RNA-binding protein Hel-N1	24	3.04467e+09
Q15050	Q15050	RRS1	Ribosome biogenesis regulatory protein homolog	3.2418	0.0447596	0.0465193	0.0400878	0.0404803	0.0420719	0.0362552	0.0170414	0.0193665	0.0179326	0.000531102	0.000537258	0.000468418	3.11654	2.77416	2.6121	2.83427	0.257531	0.452441					P60709	P60709	ACTB	Actin, cytoplasmic 1, 3.6.4.-, Beta-actin	18	-1.07935	Yes		Q9UHD8	Q9UHD8	SEPTIN9	Septin-9, MLL septin-like fusion protein MSF-A, MLL septin-like fusion protein, Ovarian/Breast septin, Ov/Br septin, Septin D1	36	2.33702e+09	2.03973e+09	2.09778e+09		Q14151	Q14151	SAFB2	Scaffold attachment factor B2, SAF-B2	24	1.13546e+09
O15226	O15226	NKRF	NF-kappa-B-repressing factor, NFkB-repressing factor, NRF, Protein ITBA4	2.83429	0.0318696	0.0309013	0.0305545	0.0279505	0.0271013	0.0267971	0.012775	0.0122171	0.0127789	0.000366711	0.000346084	0.000346219	2.87053	2.83278	2.70931	2.80421	0.0843258	0.44781					P62841	P62841	RPS15	40S ribosomal protein S15, RIG protein, Small ribosomal subunit protein uS19	17	5.04989	Yes		Q96PK6	Q96PK6	RBM14	RNA-binding protein 14, Paraspeckle protein 2, PSP2, RNA-binding motif protein 14, RRM-containing coactivator activator/modulator, Synaptotagmin-interacting protein, SYT-interacting protein	35	2.23719e+09	2.24899e+09	1.94359e+09		Q8N1G4	Q8N1G4	LRRC47	Leucine-rich repeat-containing protein 47	24	1.04454e+09
Q92667	Q92667	AKAP1	A-kinase anchor protein 1, mitochondrial, A-kinase anchor protein 149 kDa, AKAP 149, Dual specificity A-kinase-anchoring protein 1, D-AKAP-1, Protein kinase A-anchoring protein 1, PRKA1, Spermatid A-kinase anchor protein 84, S-AKAP84	4.99338	0.00073212	0.000989039	0.0014566	0.000709835	0.000958935	0.00141226	0.00072437	0.000335567	0.000531752	9.31304e-06	1.22456e-05	1.82464e-05	1.28567	3.64923	3.43137	2.78876	1.30626	0.445411					P62269	P62269	RPS18	40S ribosomal protein S18, Ke-3, Ke3, Small ribosomal subunit protein uS13	17	4.72098	Yes		P08195	P08195	SLC3A2	4F2 cell-surface antigen heavy chain, 4F2hc, 4F2 heavy chain antigen, Lymphocyte activation antigen 4F2 large subunit, Solute carrier family 3 member 2, CD98	35	1.42755e+10	9.91917e+09	1.47281e+10		P51114	P51114	FXR1	RNA-binding protein FXR1, FMR1 autosomal homolog 1, hFXR1p	24	2.70962e+09
Q96KR1	Q96KR1	ZFR	Zinc finger RNA-binding protein, hZFR, M-phase phosphoprotein homolog	3.17353	0.0290358	0.0264884	0.0270357	0.0261388	0.0238455	0.0243382	0.0124664	0.0115078	0.0106093	0.00034294	0.000304507	0.000314449	2.75091	2.64608	2.9639	2.78696	0.161946	0.445131					P27635	P27635	RPL10	60S ribosomal protein L10, Laminin receptor homolog, Large ribosomal subunit protein uL16, Protein QM, Ribosomal protein L10, Tumor suppressor QM	17	3.95294	Yes		Q14839	Q14839	CHD4	Chromodomain-helicase-DNA-binding protein 4, CHD-4, 3.6.4.12, ATP-dependent helicase CHD4, Mi-2 autoantigen 218 kDa protein, Mi2-beta	35	1.6834e+09	1.28888e+09	1.60149e+09		Q8TDN6	Q8TDN6	BRIX1	Ribosome biogenesis protein BRX1 homolog, Brix domain-containing protein 2	24	2.36973e+09
Q8IXM3	Q8IXM3	MRPL41	39S ribosomal protein L41, mitochondrial, L41mt, MRP-L41, 39S ribosomal protein L27 homolog, Bcl-2-interacting mitochondrial ribosomal protein L41, Cell proliferation-inducing gene 3 protein, MRP-L27 homolog, Mitochondrial large ribosomal subunit protein mL41	10	0.00238768	0.00310343	0.00349479	0.00238535	0.00310041	0.00349138	0.00123001	0.00160268	0.00135893	3.12959e-05	3.95922e-05	4.51086e-05	2.54435	2.47037	3.31942	2.77805	0.4703	0.44374					P30419	P30419	NMT1	Glycylpeptide N-tetradecanoyltransferase 1, 2.3.1.97, Myristoyl-CoA:protein N-myristoyltransferase 1, HsNMT1, NMT 1, Type I N-myristoyltransferase, Peptide N-myristoyltransferase 1, Protein-lysine myristoyltransferase NMT1, 2.3.1.-	17	3.63827	Yes		P56192	P56192	MARS1	Methionine--tRNA ligase, cytoplasmic, 6.1.1.10, Methionyl-tRNA synthetase, MetRS	35	1.91067e+09	1.35114e+09	1.6743e+09		P58107	P58107	EPPK1	Epiplakin, 450 kDa epidermal antigen	24	3.26853e+09
Q8NDF8	Q8NDF8	TENT4B	Terminal nucleotidyltransferase 4B, Non-canonical poly(A) RNA polymerase PAPD5, 2.7.7.19, PAP-associated domain-containing protein 5, Terminal guanylyltransferase, 2.7.7.-, Terminal uridylyltransferase 3, TUTase 3, Topoisomerase-related function protein 4-2, TRF4-2	2.98818	0.000819494	0.000782678	0.000871711	0.000727774	0.000695078	0.000774147	0.000287027	0.000584928	0.000289085	9.5484e-06	8.87615e-06	1.0002e-05	3.32665	1.51748	3.45987	2.768	1.08503	0.442166					Q9UH17	Q9UH17	APOBEC3B	DNA dC->dU-editing enzyme APOBEC-3B, A3B, 3.5.4.38, Phorbolin-1-related protein, Phorbolin-2/3	17	3.22055	Yes		Q7L1Q6	Q7L1Q6	BZW1	eIF5-mimic protein 2, Basic leucine zipper and W2 domain-containing protein 1, Protein Orf	35	3.52462e+09	3.39668e+09	3.44362e+09		Q01082	Q01082	SPTBN1	Spectrin beta chain, non-erythrocytic 1, Beta-II spectrin, Fodrin beta chain, Spectrin, non-erythroid beta chain 1	24	2.65724e+08
O75319	O75319	DUSP11	RNA/RNP complex-1-interacting phosphatase, 3.1.3.-, Dual specificity protein phosphatase 11, Phosphatase that interacts with RNA/RNP complex 1	0.966697	0.00402207	0.00390439	0.00329906	0.00266067	0.00258282	0.00218239	0.00137882	0.00114663	0.000985496	3.4908e-05	3.29827e-05	2.81965e-05	2.53173	2.8765	2.86114	2.75646	0.194771	0.440351					Q14694	Q14694	USP10	Ubiquitin carboxyl-terminal hydrolase 10, 3.4.19.12, Deubiquitinating enzyme 10, Ubiquitin thioesterase 10, Ubiquitin-specific-processing protease 10	17	3.02411	Yes		Q14684	Q14684	RRP1B	Ribosomal RNA processing protein 1 homolog B, RRP1-like protein B	35	1.19318e+09	1.22803e+09	1.08224e+09		P31483	P31483	TIA1	Cytotoxic granule associated RNA binding protein TIA1, Nucleolysin TIA-1 isoform p40, RNA-binding protein TIA-1, T-cell-restricted intracellular antigen-1, TIA-1, p40-TIA-1	23	4.42139e+09
Q9Y324	Q9Y324	FCF1	rRNA-processing protein FCF1 homolog	1.38648	0.00465988	0.00495265	0.00223649	0.00337063	0.0035824	0.00161772	0.00131143	0.00131203	0.00160156	4.42226e-05	4.57472e-05	2.09009e-05	3.37209	3.48676	1.30504	2.72129	1.22785	0.434775					Q14258	Q14258	TRIM25	E3 ubiquitin/ISG15 ligase TRIM25, 6.3.2.n3, Estrogen-responsive finger protein, RING finger protein 147, RING-type E3 ubiquitin transferase, 2.3.2.27, RING-type E3 ubiquitin transferase TRIM25, Tripartite motif-containing protein 25, Ubiquitin/ISG15-conjugating enzyme TRIM25, Zinc finger protein 147	17	2.34996	Yes		Q14974	Q14974	KPNB1	Importin subunit beta-1, Importin-90, Karyopherin subunit beta-1, Nuclear factor p97, Pore targeting complex 97 kDa subunit, PTAC97	35	4.46947e+09	2.80552e+09	3.67436e+09		P67809	P67809	YBX1	Y-box-binding protein 1, YB-1, CCAAT-binding transcription factor I subunit A, CBF-A, DNA-binding protein B, DBPB, Enhancer factor I subunit A, EFI-A, Nuclease-sensitive element-binding protein 1, Y-box transcription factor	23	2.60901e+10
Q9Y2W1	Q9Y2W1	THRAP3	Thyroid hormone receptor-associated protein 3, BCLAF1 and THRAP3 family member 2, Thyroid hormone receptor-associated protein complex 150 kDa component, Trap150	1.90665	0.0620202	0.0620165	0.0758984	0.0489616	0.0489587	0.0599177	0.0259832	0.0270268	0.0234949	0.000642377	0.000625203	0.000774137	2.47228	2.31327	3.29491	2.69349	0.526885	0.430315					Q9H6T0	Q9H6T0	ESRP2	Epithelial splicing regulatory protein 2, RNA-binding motif protein 35B, RNA-binding protein 35B	17	2.17824	Yes		P78347	P78347	GTF2I	General transcription factor II-I, GTFII-I, TFII-I, Bruton tyrosine kinase-associated protein 135, BAP-135, BTK-associated protein 135, SRF-Phox1-interacting protein, SPIN, Williams-Beuren syndrome chromosomal region 6 protein	35	1.76834e+09	1.35696e+09	1.58045e+09		Q8WVV9	Q8WVV9	HNRNPLL	Heterogeneous nuclear ribonucleoprotein L-like, hnRNPLL, Stromal RNA-regulating factor	23	9.88498e+08
Q9NQ55	Q9NQ55	PPAN	Suppressor of SWI4 1 homolog, Ssf-1, Brix domain-containing protein 3, Peter Pan homolog	3.02172	0.0431323	0.0401438	0.0360962	0.0384036	0.0357427	0.0321388	0.0156231	0.019755	0.0163844	0.000503855	0.000456434	0.000415234	3.22507	2.31047	2.53432	2.68996	0.476749	0.429745					Q15459	Q15459	SF3A1	Splicing factor 3A subunit 1, SF3a120, Spliceosome-associated protein 114, SAP 114	17	2.03338	Yes		P07910	P07910	HNRNPC	Heterogeneous nuclear ribonucleoproteins C1/C2, hnRNP C1/C2	34	1.5267e+10	2.85327e+10	2.06547e+10		Q96QC0	Q96QC0	PPP1R10	Serine/threonine-protein phosphatase 1 regulatory subunit 10, MHC class I region proline-rich protein CAT53, PP1-binding protein of 114 kDa, Phosphatase 1 nuclear targeting subunit, Protein FB19, p99	23	1.25367e+09
Q9Y3Y2	Q9Y3Y2	CHTOP	Chromatin target of PRMT1 protein, Friend of PRMT1 protein, Small arginine- and glycine-rich protein, SRAG	3.90294	0.0179352	0.0190654	0.016507	0.0168114	0.0178707	0.0154726	0.00697501	0.00901293	0.00860976	0.000220566	0.000228209	0.000199906	3.16223	2.53202	2.32186	2.67204	0.437331	0.426842					Q9BWF3	Q9BWF3	RBM4	RNA-binding protein 4, Lark homolog, hLark, RNA-binding motif protein 4, RNA-binding motif protein 4a	17	1.91182	Yes		P50395	P50395	GDI2	Rab GDP dissociation inhibitor beta, Rab GDI beta, Guanosine diphosphate dissociation inhibitor 2, GDI-2	34	7.68802e+09	6.92539e+09	7.37404e+09		Q9NY93	Q9NY93	DDX56	Probable ATP-dependent RNA helicase DDX56, 3.6.4.13, ATP-dependent 61 kDa nucleolar RNA helicase, DEAD box protein 21, DEAD box protein 56	23	2.1995e+09
Q03701	Q03701	CEBPZ	CCAAT/enhancer-binding protein zeta, CCAAT-box-binding transcription factor, CBF, CCAAT-binding factor	4.00791	0.027853	0.0249501	0.0272318	0.026223	0.02349	0.0256382	0.0123606	0.0115658	0.012598	0.000344046	0.000299967	0.000331245	2.78341	2.59357	2.62934	2.66877	0.100881	0.426312					O43143	O43143	DHX15	ATP-dependent RNA helicase DHX15, 3.6.4.13, ATP-dependent RNA helicase #46, DEAH box protein 15, Splicing factor Prp43, hPrp43	17	0.926371	Yes		P52597	P52597	HNRNPF	Heterogeneous nuclear ribonucleoprotein F, hnRNP F, Nucleolin-like protein mcs94-1	34	4.41555e+09	6.27981e+09	5.18955e+09		Q9NV06	Q9NV06	DCAF13	DDB1- and CUL4-associated factor 13, WD repeat and SOF domain-containing protein 1	23	1.51045e+09
Q8WUA2	Q8WUA2	PPIL4	Peptidyl-prolyl cis-trans isomerase-like 4, PPIase, 5.2.1.8, Cyclophilin-like protein PPIL4, Rotamase PPIL4	0.23396	0.00289704	0.00304669	0.00374182	0.00156572	0.00164659	0.00202228	0.000948565	0.000760845	0.000872662	2.05422e-05	2.1027e-05	2.61278e-05	2.16561	2.76363	2.99404	2.64109	0.427594	0.421784					Q7L2J0	Q7L2J0	MEPCE	7SK snRNA methylphosphate capping enzyme, MePCE, 2.1.1.-, Bicoid-interacting protein 3 homolog, Bin3 homolog	17	0.753719	Yes		Q96I24	Q96I24	FUBP3	Far upstream element-binding protein 3, FUSE-binding protein 3	34	1.70872e+09	2.97954e+09	2.35134e+09		Q13247	Q13247	SRSF6	Serine/arginine-rich splicing factor 6, Pre-mRNA-splicing factor SRP55, Splicing factor, arginine/serine-rich 6	23	1.39024e+10
Q99700	Q99700	ATXN2	Ataxin-2, Spinocerebellar ataxia type 2 protein, Trinucleotide repeat-containing gene 13 protein	3.42657	0.00484771	0.00517841	0.00646837	0.00443522	0.00473778	0.00591798	0.00291263	0.00246894	0.00222648	5.81901e-05	6.05014e-05	7.64603e-05	1.99785	2.4505	3.43413	2.62749	0.734317	0.419542					O00410	O00410	IPO5	Importin-5, Imp5, Importin subunit beta-3, Karyopherin beta-3, Ran-binding protein 5, RanBP5	17	-0.829605	Yes		P08621	P08621	SNRNP70	U1 small nuclear ribonucleoprotein 70 kDa, U1 snRNP 70 kDa, U1-70K, snRNP70	34	2.67689e+09	2.8451e+09	2.48324e+09		Q14157	Q14157	UBAP2L	Ubiquitin-associated protein 2-like, Protein NICE-4, RNA polymerase II degradation factor UBAP2L	23	2.64155e+09
Q9UN86	Q9UN86	G3BP2	Ras GTPase-activating protein-binding protein 2, G3BP-2, GAP SH3 domain-binding protein 2	4.66138	0.0500287	0.0524573	0.0449259	0.0481269	0.0504632	0.043218	0.0229037	0.0221334	0.0254438	0.000631424	0.000644414	0.000558377	2.75687	2.9115	2.19455	2.62097	0.377301	0.418462					P50991	P50991	CCT4	T-complex protein 1 subunit delta, TCP-1-delta, CCT-delta, Stimulator of TAR RNA-binding	17	-1.15078	Yes		P26641	P26641	EEF1G	Elongation factor 1-gamma, EF-1-gamma, eEF-1B gamma	34	1.33542e+10	1.09919e+10	1.24876e+10		P22087	P22087	FBL	rRNA 2'-O-methyltransferase fibrillarin, 2.1.1.-, 34 kDa nucleolar scleroderma antigen, Histone-glutamine methyltransferase, U6 snRNA 2'-O-methyltransferase fibrillarin	23	6.32401e+09
Q9Y580	Q9Y580	RBM7	RNA-binding protein 7, RNA-binding motif protein 7	-1.04776	0.00729209	0.0087782	0.00779099	0.00237735	0.00286185	0.00254	0.0012532	0.00127392	0.00131508	3.11909e-05	3.65458e-05	3.28168e-05	2.48889	2.86876	2.49542	2.61769	0.217458	0.417918					Q9NSD9	Q9NSD9	FARSB	Phenylalanine--tRNA ligase beta subunit, 6.1.1.20, Phenylalanyl-tRNA synthetase beta subunit, PheRS	17	-10	No		P22234	P22234	PAICS	Bifunctional phosphoribosylaminoimidazole carboxylase/phosphoribosylaminoimidazole succinocarboxamide synthetase, PAICS, Phosphoribosylaminoimidazole carboxylase, 4.1.1.21, AIR carboxylase, AIRC, Phosphoribosylaminoimidazole succinocarboxamide synthetase, 6.3.2.6, SAICAR synthetase	34	4.63518e+09	3.9404e+09	4.17452e+09		Q14498	Q14498	RBM39	RNA-binding protein 39, CAPER alpha, CAPERalpha, Hepatocellular carcinoma protein 1, RNA-binding motif protein 39, RNA-binding region-containing protein 2, Splicing factor HCC1	23	3.15458e+09
Q6P158	Q6P158	DHX57	Putative ATP-dependent RNA helicase DHX57, 3.6.4.13, DEAH box protein 57	1.06956	0.0175457	0.0153629	0.0159355	0.0118836	0.0104052	0.010793	0.00557213	0.00523231	0.00554574	0.000155912	0.000132874	0.000139446	2.79808	2.53949	2.51447	2.61735	0.157018	0.417861					P62081	P62081	RPS7	40S ribosomal protein S7, Small ribosomal subunit protein eS7	16	5.0491	Yes		Q9UKM9	Q9UKM9	RALY	RNA-binding protein Raly, Autoantigen p542, Heterogeneous nuclear ribonucleoprotein C-like 2, hnRNP core protein C-like 2, hnRNP associated with lethal yellow protein homolog	34	2.83407e+09	3.78495e+09	2.84285e+09		P83731	P83731	RPL24	60S ribosomal protein L24, 60S ribosomal protein L30, Large ribosomal subunit protein eL24	23	1.18858e+10
Q5JTH9	Q5JTH9	RRP12	RRP12-like protein	2.40232	0.0737184	0.0691831	0.0657081	0.061992	0.0581781	0.0552559	0.0274482	0.0314403	0.0284981	0.000813334	0.000742935	0.000713906	2.96316	2.363	2.5051	2.61042	0.313635	0.41671					P51114	P51114	FXR1	RNA-binding protein FXR1, FMR1 autosomal homolog 1, hFXR1p	16	4.9414	Yes		O15042	O15042	U2SURP	U2 snRNP-associated SURP motif-containing protein, 140 kDa Ser/Arg-rich domain protein, U2-associated protein SR140	34	7.2501e+09	6.99402e+09	6.07104e+09		Q6DKI1	Q6DKI1	RPL7L1	60S ribosomal protein L7-like 1, Large ribosomal subunit protein uL30-like 1	23	1.62243e+09
Q86XZ4	Q86XZ4	SPATS2	Spermatogenesis-associated serine-rich protein 2, Serine-rich spermatocytes and round spermatid 59 kDa protein, p59scr	3.86564	0.00148946	0.00213421	0.00206608	0.00139384	0.00199721	0.00193345	0.000944835	0.000796122	0.000940388	1.82872e-05	2.55043e-05	2.49801e-05	1.9355	3.20357	2.65636	2.59848	0.636015	0.414719					Q8NDT2	Q8NDT2	RBM15B	Putative RNA-binding protein 15B, One-twenty two protein 3, HsOTT3, HuOTT3, RNA-binding motif protein 15B	16	4.86025	Yes		P27635	P27635	RPL10	60S ribosomal protein L10, Laminin receptor homolog, Large ribosomal subunit protein uL16, Protein QM, Ribosomal protein L10, Tumor suppressor QM	34	8.58055e+09	9.40907e+09	9.95761e+09		P61353	P61353	RPL27	60S ribosomal protein L27, Large ribosomal subunit protein eL27	23	1.55886e+10
Q96GQ7	Q96GQ7	DDX27	Probable ATP-dependent RNA helicase DDX27, 3.6.4.13, DEAD box protein 27	3.46508	0.0554667	0.0538503	0.0513927	0.050861	0.0493789	0.0471253	0.0245069	0.0253813	0.0235908	0.000667297	0.000630568	0.000608859	2.72289	2.48438	2.58091	2.59606	0.119977	0.414315					P40429	P40429	RPL13A	60S ribosomal protein L13a, 23 kDa highly basic protein, Large ribosomal subunit protein uL13	16	4.81615	Yes		P31689	P31689	DNAJA1	DnaJ homolog subfamily A member 1, DnaJ protein homolog 2, HSDJ, Heat shock 40 kDa protein 4, Heat shock protein J2, HSJ-2, Human DnaJ protein 2, hDj-2	34	3.31184e+09	2.58929e+09	3.27097e+09		Q9Y5J1	Q9Y5J1	UTP18	U3 small nucleolar RNA-associated protein 18 homolog, WD repeat-containing protein 50	23	7.17871e+08
Q9BX40	Q9BX40	LSM14B	Protein LSM14 homolog B, RNA-associated protein 55B, hRAP55B	7.52791	0.000924665	0.00182309	0.00155224	0.000919682	0.00181327	0.00154387	0.000734634	0.000706654	0.000700615	1.20662e-05	2.31554e-05	1.99468e-05	1.64248	3.27677	2.84705	2.58877	0.847207	0.413093					Q8WWM7	Q8WWM7	ATXN2L	Ataxin-2-like protein, Ataxin-2 domain protein, Ataxin-2-related protein	16	4.73119	Yes		Q96T58	Q96T58	SPEN	Msx2-interacting protein, SMART/HDAC1-associated repressor protein, SPEN homolog	34	5.25035e+08	5.32276e+08	4.66175e+08		Q9BY77	Q9BY77	POLDIP3	Polymerase delta-interacting protein 3, 46 kDa DNA polymerase delta interaction protein, p46, S6K1 Aly/REF-like target, SKAR	23	6.7419e+08
Q6P2Q9	Q6P2Q9	PRPF8	Pre-mRNA-processing-splicing factor 8, 220 kDa U5 snRNP-specific protein, PRP8 homolog, Splicing factor Prp8, p220	3.72364	0.219013	0.179839	0.175188	0.203601	0.167184	0.16286	0.0909733	0.0844841	0.0914688	0.00267124	0.00213494	0.00210415	2.93629	2.52703	2.30041	2.58791	0.322286	0.412949					P11387	P11387	TOP1	DNA topoisomerase 1, 5.6.2.1, DNA topoisomerase I	16	4.67163	Yes		P49588	P49588	AARS1	Alanine--tRNA ligase, cytoplasmic, 6.1.1.7, Alanyl-tRNA synthetase, AlaRS, Renal carcinoma antigen NY-REN-42	34	1.61684e+09	1.00506e+09	1.36203e+09		P62899	P62899	RPL31	60S ribosomal protein L31, Large ribosomal subunit protein eL31	23	7.0271e+09
Q9Y5A9	Q9Y5A9	YTHDF2	YTH domain-containing family protein 2, DF2, CLL-associated antigen KW-14, High-glucose-regulated protein 8, Renal carcinoma antigen NY-REN-2	3.56733	0.011641	0.00974954	0.0101572	0.0107354	0.00899107	0.00936698	0.00585248	0.00446889	0.00439627	0.000140848	0.000114816	0.000121021	2.40664	2.56923	2.75282	2.57623	0.173194	0.410985					Q9H8H0	Q9H8H0	NOL11	Nucleolar protein 11	16	4.67134	Yes		P46781	P46781	RPS9	40S ribosomal protein S9, Small ribosomal subunit protein uS4	34	9.90413e+09	1.23083e+10	1.05445e+10		Q13813	Q13813	SPTAN1	Spectrin alpha chain, non-erythrocytic 1, Alpha-II spectrin, Fodrin alpha chain, Spectrin, non-erythroid alpha subunit	23	1.67749e+09
P23588	P23588	EIF4B	Eukaryotic translation initiation factor 4B, eIF-4B	2.44262	0.255561	0.277342	0.446889	0.215855	0.234252	0.377456	0.138356	0.137487	0.142089	0.00283201	0.0029914	0.00487674	2.0469	2.17577	3.43216	2.55161	0.765298	0.406814					Q99848	Q99848	EBNA1BP2	Probable rRNA-processing protein EBP2, EBNA1-binding protein 2, Nucleolar protein p40	16	4.53217	Yes		Q13263	Q13263	TRIM28	Transcription intermediary factor 1-beta, TIF1-beta, E3 SUMO-protein ligase TRIM28, 2.3.2.27, KRAB-associated protein 1, KAP-1, KRAB-interacting protein 1, KRIP-1, Nuclear corepressor KAP-1, RING finger protein 96, RING-type E3 ubiquitin transferase TIF1-beta, Tripartite motif-containing protein 28	34	2.91741e+09	2.19578e+09	2.91907e+09		P42285	P42285	MTREX	Exosome RNA helicase MTR4, 3.6.4.13, ATP-dependent RNA helicase DOB1, ATP-dependent RNA helicase SKIV2L2, Superkiller viralicidic activity 2-like 2, TRAMP-like complex helicase	23	4.80998e+08
Q9Y3A2	Q9Y3A2	UTP11	Probable U3 small nucleolar RNA-associated protein 11, U3 snoRNA-associated protein 11, UTP11-like protein	10	0.00781089	0.00723412	0.00699967	0.00780327	0.00722706	0.00699284	0.00325347	0.00446405	0.00371633	0.000102379	9.22896e-05	9.03475e-05	3.14677	2.0674	2.43109	2.54842	0.549165	0.406271					P22087	P22087	FBL	rRNA 2'-O-methyltransferase fibrillarin, 2.1.1.-, 34 kDa nucleolar scleroderma antigen, Histone-glutamine methyltransferase, U6 snRNA 2'-O-methyltransferase fibrillarin	16	3.47303	Yes		O75694	O75694	NUP155	Nuclear pore complex protein Nup155, 155 kDa nucleoporin, Nucleoporin Nup155	34	1.61716e+09	1.09555e+09	1.41382e+09		P11388	P11388	TOP2A	DNA topoisomerase 2-alpha, 5.6.2.2, DNA topoisomerase II, alpha isozyme	23	5.74947e+08
Q99575	Q99575	POP1	Ribonucleases P/MRP protein subunit POP1, hPOP1	3.00149	0.0578445	0.0575009	0.0581056	0.0514232	0.0511178	0.0516554	0.0259241	0.0278591	0.0249734	0.000674673	0.000652774	0.000667387	2.60249	2.34313	2.67239	2.53934	0.173482	0.40472					P46781	P46781	RPS9	40S ribosomal protein S9, Small ribosomal subunit protein uS4	16	3.44666	Yes		P62333	P62333	PSMC6	26S proteasome regulatory subunit 10B, 26S proteasome AAA-ATPase subunit RPT4, Proteasome 26S subunit ATPase 6, Proteasome subunit p42	34	1.63478e+09	8.94472e+08	1.35416e+09		P60842	P60842	EIF4A1	Eukaryotic initiation factor 4A-I, eIF-4A-I, eIF4A-I, 3.6.4.13, ATP-dependent RNA helicase eIF4A-1	23	3.14055e+09
Q8N1G4	Q8N1G4	LRRC47	Leucine-rich repeat-containing protein 47	4.15924	0.0178787	0.0169857	0.016797	0.0169311	0.0160854	0.0159067	0.00916538	0.00709445	0.00896245	0.000222136	0.00020541	0.000205515	2.42364	2.89537	2.29306	2.53736	0.316847	0.404381					Q92499	Q92499	DDX1	ATP-dependent RNA helicase DDX1, 3.6.4.13, DEAD box protein 1, DEAD box protein retinoblastoma, DBP-RB	16	3.22496	Yes		P40926	P40926	MDH2	Malate dehydrogenase, mitochondrial, 1.1.1.37	34	6.49763e+09	5.30344e+09	5.91249e+09		P38919	P38919	EIF4A3	Eukaryotic initiation factor 4A-III, eIF-4A-III, eIF4A-III, 3.6.4.13, ATP-dependent RNA helicase DDX48, ATP-dependent RNA helicase eIF4A-3, DEAD box protein 48, Eukaryotic initiation factor 4A-like NUK-34, Eukaryotic translation initiation factor 4A isoform 3, Nuclear matrix protein 265, NMP 265, hNMP 265	23	5.93327e+08
Q96GW9	Q96GW9	MARS2	Methionine--tRNA ligase, mitochondrial, 6.1.1.10, Methionyl-tRNA synthetase 2, Mitochondrial methionyl-tRNA synthetase, MtMetRS	2.87887	0.000527678	0.000465854	0.000372426	0.000464527	0.000410102	0.000327855	0.000153196	0.000369721	0.000193154	6.09459e-06	5.237e-06	4.23589e-06	3.97828	1.41647	2.19301	2.52925	1.31359	0.402993					Q8TB72	Q8TB72	PUM2	Pumilio homolog 2, Pumilio-2	16	2.93441	Yes		O00567	O00567	NOP56	Nucleolar protein 56, Nucleolar protein 5A	33	2.38582e+09	2.31442e+09	2.26849e+09		P38646	P38646	HSPA9	Stress-70 protein, mitochondrial, 75 kDa glucose-regulated protein, GRP-75, Heat shock 70 kDa protein 9, Mortalin, MOT, Peptide-binding protein 74, PBP74	23	6.88051e+08
Q76FK4	Q76FK4	NOL8	Nucleolar protein 8, Nucleolar protein Nop132	5.46896	0.00464904	0.00458521	0.00444741	0.00454639	0.00448397	0.00434922	0.00257297	0.0022754	0.00208594	5.96487e-05	5.72603e-05	5.61919e-05	2.31828	2.51649	2.69384	2.50953	0.187876	0.399593					Q6Y7W6	Q6Y7W6	GIGYF2	GRB10-interacting GYF protein 2, PERQ amino acid-rich with GYF domain-containing protein 2, Trinucleotide repeat-containing gene 15 protein	16	2.91572	Yes		Q96AC1	Q96AC1	FERMT2	Fermitin family homolog 2, Kindlin-2, Mitogen-inducible gene 2 protein, MIG-2, Pleckstrin homology domain-containing family C member 1, PH domain-containing family C member 1	33	1.15494e+09	9.22352e+08	1.22783e+09		Q00610	Q00610	CLTC	Clathrin heavy chain 1, Clathrin heavy chain on chromosome 17, CLH-17	23	5.12771e+08
Q9P275	Q9P275	USP36	Ubiquitin carboxyl-terminal hydrolase 36, 3.4.19.12, Deubiquitinating enzyme 36, Ubiquitin thioesterase 36, Ubiquitin-specific-processing protease 36	3.01893	0.0191613	0.0198707	0.0207795	0.017057	0.0176885	0.0184975	0.00946389	0.00946473	0.00887872	0.000223788	0.000225882	0.000238987	2.36465	2.38657	2.69169	2.48097	0.182818	0.394621					Q9Y2X3	Q9Y2X3	NOP58	Nucleolar protein 58, Nucleolar protein 5	16	2.43667	Yes		Q14247	Q14247	CTTN	Src substrate cortactin, Amplaxin, Oncogene EMS1	33	2.01905e+09	2.37318e+09	1.31755e+09		Q5T6F2	Q5T6F2	UBAP2	Ubiquitin-associated protein 2, UBAP-2, RNA polymerase II degradation factor UBAP2	22	2.15241e+09
Q14444	Q14444	CAPRIN1	Caprin-1, Cell cycle-associated protein 1, Cytoplasmic activation- and proliferation-associated protein 1, GPI-anchored membrane protein 1, GPI-anchored protein p137, GPI-p137, p137GPI, Membrane component chromosome 11 surface marker 1, RNA granule protein 105	5.55058	0.124706	0.120935	0.119529	0.122101	0.118408	0.117032	0.0643504	0.0553907	0.0696483	0.00160196	0.00151208	0.00151205	2.48944	2.72984	2.17098	2.46342	0.280332	0.391538					P60842	P60842	EIF4A1	Eukaryotic initiation factor 4A-I, eIF-4A-I, eIF4A-I, 3.6.4.13, ATP-dependent RNA helicase eIF4A-1	16	2.1407	Yes		O15371	O15371	EIF3D	Eukaryotic translation initiation factor 3 subunit D, eIF3d, Eukaryotic translation initiation factor 3 subunit 7, eIF-3-zeta, eIF3 p66	33	2.78245e+09	2.81865e+09	2.66333e+09		Q07666	Q07666	KHDRBS1	KH domain-containing, RNA-binding, signal transduction-associated protein 1, GAP-associated tyrosine phosphoprotein p62, Src-associated in mitosis 68 kDa protein, Sam68, p21 Ras GTPase-activating protein-associated p62, p68	22	9.30674e+09
P51114	P51114	FXR1	RNA-binding protein FXR1, FMR1 autosomal homolog 1, hFXR1p	4.9414	0.0463786	0.0453028	0.0421685	0.0449168	0.0438748	0.0408394	0.0234013	0.0219443	0.0230617	0.000589308	0.000560282	0.000527645	2.51827	2.5532	2.28798	2.45315	0.144104	0.389724					Q07955	Q07955	SRSF1	Serine/arginine-rich splicing factor 1, Alternative-splicing factor 1, ASF-1, Splicing factor, arginine/serine-rich 1, pre-mRNA-splicing factor SF2, P33 subunit	16	1.86008	Yes		Q93009	Q93009	USP7	Ubiquitin carboxyl-terminal hydrolase 7, 3.4.19.12, Deubiquitinating enzyme 7, Herpesvirus-associated ubiquitin-specific protease, Ubiquitin thioesterase 7, Ubiquitin-specific-processing protease 7	33	1.04848e+09	6.8099e+08	8.23538e+08		P78316	P78316	NOP14	Nucleolar protein 14, Nucleolar complex protein 14	22	8.46684e+08
Q15424	Q15424	SAFB	Scaffold attachment factor B1, SAF-B, SAF-B1, HSP27 estrogen response element-TATA box-binding protein, HSP27 ERE-TATA-binding protein	2.75689	0.05011	0.0495823	0.0548834	0.043652	0.0431923	0.0478102	0.0213425	0.0251938	0.0256323	0.000572714	0.000551565	0.000617708	2.68345	2.18929	2.40988	2.42754	0.247555	0.385166					Q969Z0	Q969Z0	TBRG4	FAST kinase domain-containing protein 4, Cell cycle progression restoration protein 2, Cell cycle progression protein 2, Protein TBRG4, Transforming growth factor beta regulator 4	16	1.77397	Yes		P62906	P62906	RPL10A	60S ribosomal protein L10a, CSA-19, Large ribosomal subunit protein uL1, Neural precursor cell expressed developmentally down-regulated protein 6, NEDD-6	33	9.40201e+09	9.91493e+09	8.839e+09		Q14966	Q14966	ZNF638	Zinc finger protein 638, Cutaneous T-cell lymphoma-associated antigen se33-1, CTCL-associated antigen se33-1, Nuclear protein 220, Zinc finger matrin-like protein	22	4.08509e+08
Q9GZT3	Q9GZT3	SLIRP	SRA stem-loop-interacting RNA-binding protein, mitochondrial	4.12223	0.0559636	0.0563434	0.056342	0.0529245	0.0532837	0.0532824	0.0275762	0.0306763	0.0275816	0.00069437	0.000680433	0.000688409	2.51801	2.21811	2.4959	2.41067	0.167131	0.382138					O75643	O75643	SNRNP200	U5 small nuclear ribonucleoprotein 200 kDa helicase, 3.6.4.13, Activating signal cointegrator 1 complex subunit 3-like 1, BRR2 homolog, U5 snRNP-specific 200 kDa protein, U5-200KD	16	1.35991	Yes		Q15269	Q15269	PWP2	Periodic tryptophan protein 2 homolog	33	1.01491e+09	1.14585e+09	9.47678e+08		Q9H8H0	Q9H8H0	NOL11	Nucleolar protein 11	22	7.97249e+08
Q15397	Q15397	PUM3	Pumilio homolog 3, HBV X-transactivated gene 5 protein, HBV XAg-transactivated protein 5, Minor histocompatibility antigen HA-8, HLA-HA8	3.26667	0.0272333	0.0260724	0.0255484	0.0246699	0.0236184	0.0231437	0.0121208	0.0128212	0.0136426	0.00032367	0.000301607	0.000299017	2.67037	2.3524	2.19178	2.40485	0.243569	0.381088					P46940	P46940	IQGAP1	Ras GTPase-activating-like protein IQGAP1, p195	16	0.0726593	Yes		Q7L014	Q7L014	DDX46	Probable ATP-dependent RNA helicase DDX46, 3.6.4.13, DEAD box protein 46, PRP5 homolog	33	1.50128e+09	1.25104e+09	1.30176e+09		Q8IZ69	Q8IZ69	TRMT2A	tRNA (uracil-5-)-methyltransferase homolog A, 2.1.1.35, mRNA (uracil-5-)-methyltransferase TRMT2A, 2.1.1.-	22	7.23969e+08
O94913	O94913	PCF11	Pre-mRNA cleavage complex 2 protein Pcf11, Pre-mRNA cleavage complex II protein Pcf11	2.77368	0.000483236	0.000454774	0.000466303	0.000421587	0.000396756	0.000406814	0.00028603	0.000187085	0.000207474	5.53122e-06	5.06657e-06	5.25604e-06	1.93379	2.70817	2.53335	2.39177	0.406138	0.378719					Q9NU22	Q9NU22	MDN1	Midasin, Dynein-related AAA-ATPase MDN1, MIDAS-containing protein	16	-0.267436	Yes		Q9H6S0	Q9H6S0	YTHDC2	3'-5' RNA helicase YTHDC2, 3.6.4.13, YTH domain-containing protein 2, hYTHDC2	33	3.36787e+08	3.71861e+08	3.54051e+08		P46783	P46783	RPS10	40S ribosomal protein S10, Small ribosomal subunit protein eS10	22	2.39192e+09
O95478	O95478	NSA2	Ribosome biogenesis protein NSA2 homolog, Hairy cell leukemia protein 1, TGF-beta-inducible nuclear protein 1	3.87008	0.0207942	0.019636	0.018466	0.0194631	0.0183791	0.017284	0.00865318	0.0113178	0.0104081	0.000255356	0.000234701	0.000223309	2.951	2.07374	2.14554	2.39009	0.487089	0.378415					P06576	P06576	ATP5F1B	ATP synthase subunit beta, mitochondrial, 7.1.2.2, ATP synthase F1 subunit beta	16	-0.52439	Yes		Q14258	Q14258	TRIM25	E3 ubiquitin/ISG15 ligase TRIM25, 6.3.2.n3, Estrogen-responsive finger protein, RING finger protein 147, RING-type E3 ubiquitin transferase, 2.3.2.27, RING-type E3 ubiquitin transferase TRIM25, Tripartite motif-containing protein 25, Ubiquitin/ISG15-conjugating enzyme TRIM25, Zinc finger protein 147	33	1.19824e+09	9.64481e+08	1.203e+09		Q9P2E9	Q9P2E9	RRBP1	Ribosome-binding protein 1, 180 kDa ribosome receptor homolog, RRp, ES/130-related protein, Ribosome receptor protein	22	3.73784e+08
Q9P2N5	Q9P2N5	RBM27	RNA-binding protein 27, RNA-binding motif protein 27	3.82564	0.00469252	0.00523927	0.00413861	0.00438337	0.0048941	0.00386594	0.00272377	0.00215323	0.00232673	5.75098e-05	6.24976e-05	4.9948e-05	2.11141	2.90251	2.1467	2.38687	0.446904	0.377829					Q14974	Q14974	KPNB1	Importin subunit beta-1, Importin-90, Karyopherin subunit beta-1, Nuclear factor p97, Pore targeting complex 97 kDa subunit, PTAC97	16	-1.07201	Yes		P11498	P11498	PC	Pyruvate carboxylase, mitochondrial, 6.4.1.1, Pyruvic carboxylase, PCB	33	9.96035e+08	8.23038e+08	8.37284e+08		Q92499	Q92499	DDX1	ATP-dependent RNA helicase DDX1, 3.6.4.13, DEAD box protein 1, DEAD box protein retinoblastoma, DBP-RB	22	9.36346e+08
Q14157	Q14157	UBAP2L	Ubiquitin-associated protein 2-like, Protein NICE-4, RNA polymerase II degradation factor UBAP2L	1.44836	0.0452134	0.0560218	0.0734965	0.0330885	0.0409984	0.053787	0.029034	0.0242251	0.0198439	0.000434121	0.00052355	0.000694927	1.49522	2.16119	3.50197	2.38613	1.02211	0.377693					P42696	P42696	RBM34	RNA-binding protein 34, RNA-binding motif protein 34	16	-1.41325	Yes		P26373	P26373	RPL13	60S ribosomal protein L13, Breast basic conserved protein 1, Large ribosomal subunit protein eL13	33	1.16176e+10	1.59321e+10	1.45021e+10		P46778	P46778	RPL21	60S ribosomal protein L21, Large ribosomal subunit protein eL21	22	1.64003e+09
Q13310	Q13310	PABPC4	Polyadenylate-binding protein 4, PABP-4, Poly(A)-binding protein 4, Activated-platelet protein 1, APP-1, Inducible poly(A)-binding protein, iPABP	4.55271	0.175852	0.194511	0.193534	0.168665	0.186562	0.185625	0.0973077	0.0983205	0.0992585	0.00221289	0.00238239	0.00239827	2.27412	2.42309	2.41619	2.37113	0.0840878	0.374955					Q92804	Q92804	TAF15	TATA-binding protein-associated factor 2N, 68 kDa TATA-binding protein-associated factor, TAF(II)68, TAFII68, RNA-binding protein 56	15	6.58324	Yes		Q07065	Q07065	CKAP4	Cytoskeleton-associated protein 4, 63-kDa cytoskeleton-linking membrane protein, Climp-63, p63	33	1.36226e+09	5.8763e+08	8.20024e+08		Q7L1Q6	Q7L1Q6	BZW1	eIF5-mimic protein 2, Basic leucine zipper and W2 domain-containing protein 1, Protein Orf	22	6.5462e+08
P62995	P62995	TRA2B	Transformer-2 protein homolog beta, TRA-2 beta, TRA2-beta, hTRA2-beta, Splicing factor, arginine/serine-rich 10, Transformer-2 protein homolog B	5.02222	0.0612349	0.0631009	0.074103	0.0594068	0.0612171	0.0718908	0.0312023	0.0378879	0.0365194	0.000779417	0.000781742	0.000928829	2.49795	2.0633	2.54339	2.36821	0.265035	0.374421					Q96EP5	Q96EP5	DAZAP1	DAZ-associated protein 1, Deleted in azoospermia-associated protein 1	15	5.58688	Yes		P62081	P62081	RPS7	40S ribosomal protein S7, Small ribosomal subunit protein eS7	33	8.09065e+09	9.85509e+09	9.16097e+09		P26640	P26640	VARS1	Valine--tRNA ligase, 6.1.1.9, Protein G7a, Valyl-tRNA synthetase, ValRS	22	5.06198e+08
Q6Y7W6	Q6Y7W6	GIGYF2	GRB10-interacting GYF protein 2, PERQ amino acid-rich with GYF domain-containing protein 2, Trinucleotide repeat-containing gene 15 protein	2.91572	0.00986163	0.0101997	0.00889696	0.00870769	0.00900616	0.00785589	0.00594102	0.00369159	0.00506751	0.000114245	0.000115009	0.000101498	1.92299	3.11543	2.00292	2.34711	0.66658	0.370534					Q9NV06	Q9NV06	DCAF13	DDB1- and CUL4-associated factor 13, WD repeat and SOF domain-containing protein 1	15	4.95111	Yes		Q99460	Q99460	PSMD1	26S proteasome non-ATPase regulatory subunit 1, 26S proteasome regulatory subunit RPN2, 26S proteasome regulatory subunit S1, 26S proteasome subunit p112	33	2.44078e+09	1.71789e+09	1.96593e+09		P22102	P22102	GART	Trifunctional purine biosynthetic protein adenosine-3, Phosphoribosylamine--glycine ligase, 6.3.4.13, Glycinamide ribonucleotide synthetase, GARS, Phosphoribosylglycinamide synthetase, Phosphoribosylformylglycinamidine cyclo-ligase, 6.3.3.1, AIR synthase, AIRS, Phosphoribosyl-aminoimidazole synthetase, Phosphoribosylglycinamide formyltransferase, 2.1.2.2, 5'-phosphoribosylglycinamide transformyla…	22	2.90506e+08
P27816	P27816	MAP4	Microtubule-associated protein 4, MAP-4	3.78377	0.177841	0.148053	0.176187	0.165803	0.138031	0.16426	0.080703	0.0909189	0.0886414	0.00217533	0.00176266	0.00212224	2.69548	1.93872	2.39419	2.3428	0.380989	0.369734					P50914	P50914	RPL14	60S ribosomal protein L14, CAG-ISL 7, Large ribosomal subunit protein eL14	15	4.63482	Yes		P49736	P49736	MCM2	DNA replication licensing factor MCM2, 3.6.4.12, Minichromosome maintenance protein 2 homolog, Nuclear protein BM28	33	1.64235e+09	1.03344e+09	1.35639e+09		P11142	P11142	HSPA8	Heat shock cognate 71 kDa protein, 3.6.4.10, Heat shock 70 kDa protein 8, Lipopolysaccharide-associated protein 1, LAP-1, LPS-associated protein 1	22	1.69786e+09
Q8N8A6	Q8N8A6	DDX51	ATP-dependent RNA helicase DDX51, 3.6.4.13, DEAD box protein 51	5.22771	0.00148695	0.00157952	0.00144271	0.0014483	0.00153846	0.00140521	0.000918896	0.000622031	0.00101658	1.90017e-05	1.96461e-05	1.81553e-05	2.06788	3.15838	1.78592	2.33739	0.724841	0.368732					Q9NWH9	Q9NWH9	SLTM	SAFB-like transcription modulator, Modulator of estrogen-induced transcription	15	4.40002	Yes		Q99623	Q99623	PHB2	Prohibitin-2, B-cell receptor-associated protein BAP37, D-prohibitin, Repressor of estrogen receptor activity	33	9.03814e+09	8.64597e+09	1.01083e+10		P04406	P04406	GAPDH	Glyceraldehyde-3-phosphate dehydrogenase, GAPDH, 1.2.1.12, Peptidyl-cysteine S-nitrosylase GAPDH, 2.6.99.-	22	1.61665e+09
Q9H2U1	Q9H2U1	DHX36	ATP-dependent DNA/RNA helicase DHX36, 3.6.4.12, 3.6.4.13, DEAD/H box polypeptide 36, DEAH-box protein 36, G4-resolvase-1, G4R1, MLE-like protein 1, RNA helicase associated with AU-rich element protein	3.75899	0.0132811	0.0113624	0.0120862	0.0123676	0.0105809	0.0112549	0.00660055	0.0059971	0.00632749	0.000162263	0.000135118	0.000145413	2.45832	2.25305	2.29812	2.3365	0.107883	0.368565					Q02878	Q02878	RPL6	60S ribosomal protein L6, Large ribosomal subunit protein eL6, Neoplasm-related protein C140, Tax-responsive enhancer element-binding protein 107, TaxREB107	15	4.06367	Yes		Q9P275	Q9P275	USP36	Ubiquitin carboxyl-terminal hydrolase 36, 3.4.19.12, Deubiquitinating enzyme 36, Ubiquitin thioesterase 36, Ubiquitin-specific-processing protease 36	32	5.5289e+08	5.52945e+08	5.1871e+08		Q9NSD9	Q9NSD9	FARSB	Phenylalanine--tRNA ligase beta subunit, 6.1.1.20, Phenylalanyl-tRNA synthetase beta subunit, PheRS	22	9.45478e+08
Q9NRW3	Q9NRW3	APOBEC3C	DNA dC->dU-editing enzyme APOBEC-3C, A3C, 3.5.4.38, APOBEC1-like, Phorbolin I	4.12942	0.00326937	0.00224925	0.0022023	0.00309266	0.00212768	0.00208327	0.00130932	0.00131662	0.00147161	4.05757e-05	2.71705e-05	2.69158e-05	3.09898	2.06365	1.829	2.33054	0.675749	0.367457					Q15032	Q15032	R3HDM1	R3H domain-containing protein 1	15	3.94661	Yes		Q9H583	Q9H583	HEATR1	HEAT repeat-containing protein 1, Protein BAP28, U3 small nucleolar RNA-associated protein 10 homolog	32	1.08262e+09	8.44207e+08	7.56779e+08		Q9H6T0	Q9H6T0	ESRP2	Epithelial splicing regulatory protein 2, RNA-binding motif protein 35B, RNA-binding protein 35B	21	1.88336e+09
Q5TC82	Q5TC82	RC3H1	Roquin-1, Roquin, 2.3.2.27, RING finger and C3H zinc finger protein 1, RING finger and CCCH-type zinc finger domain-containing protein 1, RING finger protein 198	1.83366	0.00315295	0.00282992	0.00304552	0.00246218	0.00220992	0.00237829	0.00161008	0.00139666	0.0010396	3.23038e-05	2.82207e-05	3.07275e-05	2.00635	2.02058	2.9557	2.32754	0.544049	0.366898					Q9H7B2	Q9H7B2	RPF2	Ribosome production factor 2 homolog, Brix domain-containing protein 1, Ribosome biogenesis protein RPF2 homolog	15	3.66898	Yes		P15170	P15170	GSPT1	Eukaryotic peptide chain release factor GTP-binding subunit ERF3A, Eukaryotic peptide chain release factor subunit 3a, eRF3a, G1 to S phase transition protein 1 homolog	32	2.93852e+09	2.4642e+09	2.86439e+09		P16989	P16989	YBX3	Y-box-binding protein 3, Cold shock domain-containing protein A, DNA-binding protein A, Single-strand DNA-binding protein NF-GMB	21	2.7613e+10
Q9BRJ7	Q9BRJ7	NUDT16L1	Tudor-interacting repair regulator protein, NUDT16-like protein 1, Protein syndesmos	10	0.00217733	0.00228087	0.00125563	0.0021752	0.00227865	0.0012544	0.000775049	0.00112787	0.00226358	2.85387e-05	2.90983e-05	1.62069e-05	3.68218	2.57994	0.715984	2.32603	1.49931	0.366616					O00566	O00566	MPHOSPH10	U3 small nucleolar ribonucleoprotein protein MPP10, M phase phosphoprotein 10	15	3.48953	Yes		P60842	P60842	EIF4A1	Eukaryotic initiation factor 4A-I, eIF-4A-I, eIF4A-I, 3.6.4.13, ATP-dependent RNA helicase eIF4A-1	32	2.42721e+10	1.79503e+10	2.30056e+10		Q13151	Q13151	HNRNPA0	Heterogeneous nuclear ribonucleoprotein A0, hnRNP A0	21	1.4041e+10
Q7L2J0	Q7L2J0	MEPCE	7SK snRNA methylphosphate capping enzyme, MePCE, 2.1.1.-, Bicoid-interacting protein 3 homolog, Bin3 homolog	0.753719	0.0170826	0.0166168	0.0173357	0.0107231	0.0104307	0.0108819	0.00782045	0.00509202	0.00559715	0.000140687	0.0001332	0.000140595	1.79896	2.61585	2.5119	2.3089	0.444673	0.363406					Q96P11	Q96P11	NSUN5	28S rRNA (cytosine-C(5))-methyltransferase, 2.1.1.-, NOL1-related protein, NOL1R, NOL1/NOP2/Sun domain family member 5, Williams-Beuren syndrome chromosomal region 20A protein	15	3.478	Yes		P60228	P60228	EIF3E	Eukaryotic translation initiation factor 3 subunit E, eIF3e, Eukaryotic translation initiation factor 3 subunit 6, Viral integration site protein INT-6 homolog, eIF-3 p48	32	3.28228e+09	1.9941e+09	2.90818e+09		Q9NW64	Q9NW64	RBM22	Pre-mRNA-splicing factor RBM22, RNA-binding motif protein 22, Zinc finger CCCH domain-containing protein 16	21	2.00063e+09
P62633	P62633	CNBP	CCHC-type zinc finger nucleic acid binding protein, Cellular nucleic acid-binding protein, CNBP, Zinc finger protein 9	4.35506	0.0421152	0.0419014	0.0569865	0.0401531	0.0399493	0.0543316	0.0230903	0.0258504	0.026276	0.000526809	0.000510153	0.000701964	2.28152	1.97348	2.67151	2.30883	0.349814	0.363393					Q96SI9	Q96SI9	STRBP	Spermatid perinuclear RNA-binding protein	15	3.38472	Yes		Q9BVP2	Q9BVP2	GNL3	Guanine nucleotide-binding protein-like 3, E2-induced gene 3 protein, Novel nucleolar protein 47, NNP47, Nucleolar GTP-binding protein 3, Nucleostemin	32	1.60586e+09	1.72918e+09	1.68484e+09		P62841	P62841	RPS15	40S ribosomal protein S15, RIG protein, Small ribosomal subunit protein uS19	21	2.77754e+10
Q9NWH9	Q9NWH9	SLTM	SAFB-like transcription modulator, Modulator of estrogen-induced transcription	4.40002	0.0159035	0.0176228	0.0177854	0.0151843	0.0168258	0.016981	0.00999279	0.00975304	0.00811621	0.000199217	0.000214866	0.000219395	1.99361	2.20307	2.70317	2.29995	0.364566	0.361718					Q9H0J9	Q9H0J9	PARP12	Protein mono-ADP-ribosyltransferase PARP12, 2.4.2.-, ADP-ribosyltransferase diphtheria toxin-like 12, ARTD12, Poly [ADP-ribose] polymerase 12, PARP-12, Zinc finger CCCH domain-containing protein 1	15	2.7116	Yes		P23284	P23284	PPIB	Peptidyl-prolyl cis-trans isomerase B, PPIase B, 5.2.1.8, CYP-S1, Cyclophilin B, Rotamase B, S-cyclophilin, SCYLP	32	1.65848e+10	1.81424e+10	1.63948e+10		Q96SI9	Q96SI9	STRBP	Spermatid perinuclear RNA-binding protein	21	6.34478e+08
Q15646	Q15646	OASL	2'-5'-oligoadenylate synthase-like protein, 2'-5'-OAS-related protein, 2'-5'-OAS-RP, 59 kDa 2'-5'-oligoadenylate synthase-like protein, Thyroid receptor-interacting protein 14, TR-interacting protein 14, TRIP-14, p59 OASL, p59OASL	1.3192	0.000733337	0.000960797	0.000680035	0.000523529	0.000685913	0.000485477	0.000266682	0.000319591	0.000396137	6.8687e-06	8.75911e-06	6.27236e-06	2.57562	2.74072	1.58338	2.29991	0.625997	0.36171					P26038	P26038	MSN	Moesin, Membrane-organizing extension spike protein	15	2.63267	Yes		Q13283	Q13283	G3BP1	Ras GTPase-activating protein-binding protein 1, G3BP-1, 3.6.4.12, 3.6.4.13, ATP-dependent DNA helicase VIII, hDH VIII, GAP SH3 domain-binding protein 1	32	3.41387e+09	2.89389e+09	3.16676e+09		Q14694	Q14694	USP10	Ubiquitin carboxyl-terminal hydrolase 10, 3.4.19.12, Deubiquitinating enzyme 10, Ubiquitin thioesterase 10, Ubiquitin-specific-processing protease 10	21	1.01965e+09
Q6PJT7	Q6PJT7	ZC3H14	Zinc finger CCCH domain-containing protein 14, Mammalian suppressor of tau pathology-2, MSUT-2, Renal carcinoma antigen NY-REN-37	3.30496	0.00863385	0.00950991	0.0117525	0.00784052	0.00863608	0.0106726	0.00584094	0.00446805	0.00518053	0.000102868	0.000110283	0.00013789	1.76115	2.46826	2.66169	2.29703	0.474061	0.361167					Q92973	Q92973	TNPO1	Transportin-1, Importin beta-2, Karyopherin beta-2, M9 region interaction protein, MIP	15	1.6118	Yes		P62753	P62753	RPS6	40S ribosomal protein S6, Phosphoprotein NP33, Small ribosomal subunit protein eS6	32	8.80768e+09	1.12685e+10	9.67567e+09		Q15637	Q15637	SF1	Splicing factor 1, Mammalian branch point-binding protein, BBP, mBBP, Transcription factor ZFM1, Zinc finger gene in MEN1 locus, Zinc finger protein 162	21	1.85278e+09
P22087	P22087	FBL	rRNA 2'-O-methyltransferase fibrillarin, 2.1.1.-, 34 kDa nucleolar scleroderma antigen, Histone-glutamine methyltransferase, U6 snRNA 2'-O-methyltransferase fibrillarin	3.47303	0.108243	0.0995179	0.0929276	0.0993006	0.0912962	0.0852503	0.0509084	0.0540936	0.0526288	0.00130282	0.00116585	0.00110143	2.55915	2.15525	2.09283	2.26908	0.253143	0.355849					P49792	P49792	RANBP2	E3 SUMO-protein ligase RanBP2, 2.3.2.-, 358 kDa nucleoporin, Nuclear pore complex protein Nup358, Nucleoporin Nup358, Ran-binding protein 2, RanBP2, p270	15	1.3634	Yes		P30876	P30876	POLR2B	DNA-directed RNA polymerase II subunit RPB2, 2.7.7.6, DNA-directed RNA polymerase II 140 kDa polypeptide, DNA-directed RNA polymerase II subunit B, RNA polymerase II subunit 2, RNA polymerase II subunit B2	32	8.89607e+08	9.11883e+08	8.02857e+08		Q9H2U1	Q9H2U1	DHX36	ATP-dependent DNA/RNA helicase DHX36, 3.6.4.12, 3.6.4.13, DEAD/H box polypeptide 36, DEAH-box protein 36, G4-resolvase-1, G4R1, MLE-like protein 1, RNA helicase associated with AU-rich element protein	21	7.75936e+08
Q9GZR7	Q9GZR7	DDX24	ATP-dependent RNA helicase DDX24, 3.6.4.13, DEAD box protein 24	4.24556	0.0205728	0.0199556	0.0185395	0.0195426	0.0189563	0.0176111	0.0107241	0.0104278	0.0110109	0.000256399	0.000242072	0.000227536	2.39086	2.32142	2.06646	2.25958	0.170809	0.354028					Q63HN8	Q63HN8	RNF213	E3 ubiquitin-protein ligase RNF213, 2.3.2.27, 3.6.4.-, ALK lymphoma oligomerization partner on chromosome 17, E3 ubiquitin-lipopolysaccharide ligase RNF213, 2.3.2.-, Mysterin, RING finger protein 213	15	1.19658	Yes		P00367	P00367	GLUD1	Glutamate dehydrogenase 1, mitochondrial, GDH 1, 1.4.1.3	32	2.4559e+09	1.67442e+09	1.96836e+09		Q7L2J0	Q7L2J0	MEPCE	7SK snRNA methylphosphate capping enzyme, MePCE, 2.1.1.-, Bicoid-interacting protein 3 homolog, Bin3 homolog	21	9.98036e+08
Q96I51	Q96I51	RCC1L	RCC1-like G exchanging factor-like protein, RCC1-like, Williams-Beuren syndrome chromosomal region 16 protein	2.10562	0.00601305	0.00557679	0.00498399	0.00487933	0.00452532	0.00404429	0.00251706	0.0023366	0.00300424	6.40168e-05	5.77884e-05	5.22523e-05	2.54331	2.47318	1.73928	2.25193	0.445343	0.352554					Q12931	Q12931	TRAP1	Heat shock protein 75 kDa, mitochondrial, HSP 75, TNFR-associated protein 1, Tumor necrosis factor type 1 receptor-associated protein, TRAP-1	15	0.679159	Yes		O00541	O00541	PES1	Pescadillo homolog	32	3.04601e+09	2.82066e+09	2.57915e+09		O15213	O15213	WDR46	WD repeat-containing protein 46, WD repeat-containing protein BING4	21	1.43348e+09
O75691	O75691	UTP20	Small subunit processome component 20 homolog, Down-regulated in metastasis protein, Novel nucleolar protein 73, NNP73, Protein Key-1A6	3.4588	0.0499801	0.0499162	0.0436946	0.0458134	0.0457549	0.0400519	0.0261981	0.0266305	0.0240339	0.000601072	0.00058429	0.00051747	2.29433	2.19406	2.15308	2.21383	0.0726687	0.345143					P08559	P08559	PDHA1	Pyruvate dehydrogenase E1 component subunit alpha, somatic form, mitochondrial, 1.2.4.1, PDHE1-A type I	15	0.487558	Yes		Q8WUM4	Q8WUM4	PDCD6IP	Programmed cell death 6-interacting protein, PDCD6-interacting protein, ALG-2-interacting protein 1, ALG-2-interacting protein X, Hp95	32	2.61476e+09	2.18219e+09	1.69301e+09		Q6PK04	Q6PK04	CCDC137	Coiled-coil domain-containing protein 137	21	9.54827e+08
Q9H2Y7	Q9H2Y7	ZNF106	Zinc finger protein 106, Zfp-106, Zinc finger protein 474	5.15283	0.000701615	0.000810994	0.000787052	0.000682432	0.000788821	0.000765534	0.000419756	0.000359183	0.000588355	8.95351e-06	1.00732e-05	9.8907e-06	2.13303	2.80449	1.68108	2.2062	0.56527	0.343644					P50213	P50213	IDH3A	Isocitrate dehydrogenase [NAD] subunit alpha, mitochondrial, 1.1.1.41, Isocitric dehydrogenase subunit alpha, NAD(+)-specific ICDH subunit alpha	15	-0.218008	Yes		P68104	P68104	EEF1A1	Elongation factor 1-alpha 1, EF-1-alpha-1, Elongation factor Tu, EF-Tu, Eukaryotic elongation factor 1 A-1, eEF1A-1, Leukocyte receptor cluster member 7	32	8.31545e+10	8.13559e+10	9.20414e+10		P84098	P84098	RPL19	60S ribosomal protein L19, Large ribosomal subunit protein eL19	21	4.1103e+09
O95613	O95613	PCNT	Pericentrin, Kendrin, Pericentrin-B	3.40065	0.000162418	0.000207906	0.000198533	0.000148369	0.000189922	0.00018136	0.000510745	4.41313e-05	0.000337236	1.9466e-06	2.4253e-06	2.34318e-06	0.381129	5.49565	0.694819	2.19053	2.86661	0.34055					Q9H307	Q9H307	PNN	Pinin, 140 kDa nuclear and cell adhesion-related phosphoprotein, Desmosome-associated protein, Domain-rich serine protein, DRS protein, DRSP, Melanoma metastasis clone A protein, Nuclear protein SDK3, SR-like protein	15	-0.639787	Yes		O43242	O43242	PSMD3	26S proteasome non-ATPase regulatory subunit 3, 26S proteasome regulatory subunit RPN3, 26S proteasome regulatory subunit S3, Proteasome subunit p58	32	2.60423e+09	2.37215e+09	2.61619e+09		Q9H6R4	Q9H6R4	NOL6	Nucleolar protein 6, Nucleolar RNA-associated protein, Nrap	21	5.22104e+08
P46013	P46013	MKI67	Proliferation marker protein Ki-67, Antigen identified by monoclonal antibody Ki-67, Antigen KI-67, Antigen Ki67	2.40484	0.0971435	0.103765	0.115796	0.0817135	0.0872835	0.0974035	0.0606318	0.0503205	0.0488626	0.00107208	0.00111461	0.00125845	1.76818	2.21502	2.57549	2.18623	0.404425	0.339696					P07437	P07437	TUBB	Tubulin beta chain, Tubulin beta-5 chain	15	-0.839935	Yes		P14735	P14735	IDE	Insulin-degrading enzyme, 3.4.24.56, Abeta-degrading protease, Insulin protease, Insulinase, Insulysin	32	7.24261e+08	5.41512e+08	6.56038e+08		Q7Z478	Q7Z478	DHX29	ATP-dependent RNA helicase DHX29, 3.6.4.13, DEAH box protein 29, Nucleic acid helicase DDXx	21	4.14476e+08
Q7Z739	Q7Z739	YTHDF3	YTH domain-containing family protein 3, DF3	3.52317	0.0152744	0.0140856	0.0178876	0.0140521	0.0129585	0.0164562	0.0097176	0.00874103	0.00786955	0.000184364	0.00016548	0.000212615	1.89722	1.89314	2.70174	2.16403	0.465673	0.335264					O43175	O43175	PHGDH	D-3-phosphoglycerate dehydrogenase, 3-PGDH, 1.1.1.95, 2-oxoglutarate reductase, 1.1.1.399, Malate dehydrogenase, 1.1.1.37	15	-1.69798	Yes		P00505	P00505	GOT2	Aspartate aminotransferase, mitochondrial, mAspAT, 2.6.1.1, 2.6.1.7, Fatty acid-binding protein, FABP-1, Glutamate oxaloacetate transaminase 2, Kynurenine aminotransferase 4, Kynurenine aminotransferase IV, Kynurenine--oxoglutarate transaminase 4, Kynurenine--oxoglutarate transaminase IV, Plasma membrane-associated fatty acid-binding protein, FABPpm, Transaminase A	32	5.30679e+09	5.72151e+09	5.7888e+09		Q13435	Q13435	SF3B2	Splicing factor 3B subunit 2, Pre-mRNA-splicing factor SF3b 145 kDa subunit, SF3b145, Spliceosome-associated protein 145, SAP 145	21	6.2211e+08
P78316	P78316	NOP14	Nucleolar protein 14, Nucleolar complex protein 14	4.26932	0.014492	0.0121604	0.014668	0.0137776	0.0115609	0.0139448	0.00806569	0.0080849	0.00782536	0.000180762	0.000147633	0.000180167	2.24112	1.82603	2.30235	2.12317	0.259143	0.326984					Q00577	Q00577	PURA	Transcriptional activator protein Pur-alpha, Purine-rich single-stranded DNA-binding protein alpha	14	7.5099	Yes		P08758	P08758	ANXA5	Annexin A5, Anchorin CII, Annexin V, Annexin-5, Calphobindin I, CPB-I, Endonexin II, Lipocortin V, Placental anticoagulant protein 4, PP4, Placental anticoagulant protein I, PAP-I, Thromboplastin inhibitor, Vascular anticoagulant-alpha, VAC-alpha	32	5.56131e+09	2.97101e+09	4.91898e+09		Q13206	Q13206	DDX10	Probable ATP-dependent RNA helicase DDX10, 3.6.4.13, DEAD box protein 10	21	2.41578e+09
Q9GZR2	Q9GZR2	REXO4	RNA exonuclease 4, 3.1.-.-, Exonuclease XPMC2, Prevents mitotic catastrophe 2 protein homolog, hPMC2	8.30817	0.00537182	0.00615295	0.00447377	0.00535493	0.0061336	0.0044597	0.00347376	0.00313774	0.00311968	7.02567e-05	7.83261e-05	5.76193e-05	2.0225	2.49626	1.84697	2.12191	0.335867	0.326726					Q15366	Q15366	PCBP2	Poly(rC)-binding protein 2, Alpha-CP2, Heterogeneous nuclear ribonucleoprotein E2, hnRNP E2	14	4.4989	Yes		P43246	P43246	MSH2	DNA mismatch repair protein Msh2, hMSH2, MutS protein homolog 2	32	1.27272e+09	1.04211e+09	1.0856e+09		Q9BXJ9	Q9BXJ9	NAA15	N-alpha-acetyltransferase 15, NatA auxiliary subunit, Gastric cancer antigen Ga19, N-terminal acetyltransferase, NMDA receptor-regulated protein 1, Protein tubedown-1, Tbdn100	21	6.51648e+08
P24928	P24928	POLR2A	DNA-directed RNA polymerase II subunit RPB1, RNA polymerase II subunit B1, 2.7.7.6, DNA-directed RNA polymerase II subunit A, DNA-directed RNA polymerase III largest subunit, RNA-directed RNA polymerase II subunit RPB1, 2.7.7.48	0.932952	0.0261789	0.0217661	0.0241548	0.0171802	0.0142842	0.0158518	0.0122816	0.00678191	0.0112901	0.000225404	0.000182409	0.000204806	1.8353	2.68964	1.81403	2.11299	0.499508	0.324898					P62753	P62753	RPS6	40S ribosomal protein S6, Phosphoprotein NP33, Small ribosomal subunit protein eS6	14	4.46676	Yes		P06748	P06748	NPM1	Nucleophosmin, NPM, Nucleolar phosphoprotein B23, Nucleolar protein NO38, Numatrin	31	4.33718e+10	5.18568e+10	4.31799e+10		P62241	P62241	RPS8	40S ribosomal protein S8, Small ribosomal subunit protein eS8	21	3.97963e+09
Q9NY61	Q9NY61	AATF	Protein AATF, Apoptosis-antagonizing transcription factor, Rb-binding protein Che-1	3.93409	0.00484787	0.00678205	0.00464626	0.00455019	0.0063656	0.00436096	0.0032355	0.00332281	0.00275912	5.96984e-05	8.12887e-05	5.63436e-05	1.84511	2.44638	2.04208	2.11119	0.306536	0.324528					Q8IY67	Q8IY67	RAVER1	Ribonucleoprotein PTB-binding 1, Protein raver-1	14	4.41639	Yes		P07195	P07195	LDHB	L-lactate dehydrogenase B chain, LDH-B, 1.1.1.27, LDH heart subunit, LDH-H, Renal carcinoma antigen NY-REN-46	31	3.96456e+10	3.51161e+10	3.42666e+10		P06748	P06748	NPM1	Nucleophosmin, NPM, Nucleolar phosphoprotein B23, Nucleolar protein NO38, Numatrin	21	7.58799e+09
O15213	O15213	WDR46	WD repeat-containing protein 46, WD repeat-containing protein BING4	0.942242	0.0245358	0.0213132	0.0224873	0.0161375	0.0140179	0.0147902	0.0087603	0.00907587	0.00991957	0.000211724	0.000179009	0.000191089	2.41685	1.97236	1.92638	2.1052	0.270878	0.323293					Q9H8H2	Q9H8H2	DDX31	Probable ATP-dependent RNA helicase DDX31, 3.6.4.13, DEAD box protein 31, Helicain	14	4.04002	Yes		P42285	P42285	MTREX	Exosome RNA helicase MTR4, 3.6.4.13, ATP-dependent RNA helicase DOB1, ATP-dependent RNA helicase SKIV2L2, Superkiller viralicidic activity 2-like 2, TRAMP-like complex helicase	31	1.09749e+09	9.28219e+08	9.90026e+08		Q92973	Q92973	TNPO1	Transportin-1, Importin beta-2, Karyopherin beta-2, M9 region interaction protein, MIP	21	5.96824e+08
Q14498	Q14498	RBM39	RNA-binding protein 39, CAPER alpha, CAPERalpha, Hepatocellular carcinoma protein 1, RNA-binding motif protein 39, RNA-binding region-containing protein 2, Splicing factor HCC1	2.67536	0.0539946	0.0521052	0.0496301	0.0466862	0.0450525	0.0429125	0.0280943	0.0290425	0.0260532	0.000612523	0.00057532	0.000554429	2.18024	1.98096	2.12806	2.09642	0.10334	0.321479					P33240	P33240	CSTF2	Cleavage stimulation factor subunit 2, CF-1 64 kDa subunit, Cleavage stimulation factor 64 kDa subunit, CSTF 64 kDa subunit, CstF-64	14	3.82328	Yes		Q92621	Q92621	NUP205	Nuclear pore complex protein Nup205, 205 kDa nucleoporin, Nucleoporin Nup205	31	9.29592e+08	8.3322e+08	8.6013e+08		P26038	P26038	MSN	Moesin, Membrane-organizing extension spike protein	21	1.23165e+09
P09001	P09001	MRPL3	39S ribosomal protein L3, mitochondrial, L3mt, MRP-L3, Mitochondrial large ribosomal subunit protein uL3m	2.45744	0.0124087	0.0104645	0.0100441	0.0104974	0.0088527	0.00849704	0.00634665	0.00536463	0.00570373	0.000137726	0.000113049	0.000109782	2.17006	2.1073	1.92474	2.06737	0.127446	0.315418					Q8N163	Q8N163	CCAR2	Cell cycle and apoptosis regulator protein 2, Cell division cycle and apoptosis regulator protein 2, DBIRD complex subunit KIAA1967, Deleted in breast cancer gene 1 protein, DBC-1, DBC.1, NET35, p30 DBC	14	3.59652	Yes		P32754	P32754	HPD	4-hydroxyphenylpyruvate dioxygenase, 1.13.11.27, 4-hydroxyphenylpyruvic acid oxidase, 4HPPD, HPD, HPPDase	31	3.16881e+09	2.44743e+09	2.79835e+09		Q13242	Q13242	SRSF9	Serine/arginine-rich splicing factor 9, Pre-mRNA-splicing factor SRp30C, Splicing factor, arginine/serine-rich 9	20	1.75811e+09
Q9BZE4	Q9BZE4	GTPBP4	GTP-binding protein 4, Chronic renal failure gene protein, GTP-binding protein NGB, Nucleolar GTP-binding protein 1	4.54202	0.0879739	0.0771719	0.0791109	0.084353	0.0739956	0.0758548	0.0471108	0.0504818	0.0496773	0.00110671	0.000944924	0.000980044	2.34917	1.87181	1.97282	2.0646	0.251565	0.314836					Q8WTT2	Q8WTT2	NOC3L	Nucleolar complex protein 3 homolog, NOC3 protein homolog, Factor for adipocyte differentiation 24, NOC3-like protein, Nucleolar complex-associated protein 3-like protein	14	3.32156	Yes		P49748	P49748	ACADVL	Very long-chain specific acyl-CoA dehydrogenase, mitochondrial, VLCAD, 1.3.8.9	31	1.52176e+09	1.31686e+09	1.51888e+09		O75152	O75152	ZC3H11A	Zinc finger CCCH domain-containing protein 11A	20	6.90615e+08
Q15020	Q15020	SART3	Squamous cell carcinoma antigen recognized by T-cells 3, SART-3, Tat-interacting protein of 110 kDa, Tip110, p110 nuclear RNA-binding protein	1.93949	0.0242663	0.0174345	0.0229625	0.0192482	0.0138292	0.0182139	0.0115388	0.0101533	0.0103856	0.000252536	0.000176598	0.000235324	2.18858	1.73932	2.26586	2.06458	0.284325	0.314833					Q9H6R4	Q9H6R4	NOL6	Nucleolar protein 6, Nucleolar RNA-associated protein, Nrap	14	3.23367	Yes		Q2NL82	Q2NL82	TSR1	Pre-rRNA-processing protein TSR1 homolog	31	1.37848e+09	1.30903e+09	1.41791e+09		Q9UN86	Q9UN86	G3BP2	Ras GTPase-activating protein-binding protein 2, G3BP-2, GAP SH3 domain-binding protein 2	20	2.92288e+09
Q969S3	Q969S3	ZNF622	Cytoplasmic 60S subunit biogenesis factor ZNF622, Zinc finger protein 622, Zinc finger-like protein 9	4.13836	0.0105797	0.0109911	0.0103123	0.0100112	0.0104005	0.00975819	0.0064251	0.00661191	0.00590813	0.000131347	0.000132815	0.000126076	2.04428	2.00872	2.13394	2.06231	0.0645281	0.314354					Q8WVV9	Q8WVV9	HNRNPLL	Heterogeneous nuclear ribonucleoprotein L-like, hnRNPLL, Stromal RNA-regulating factor	14	3.16789	Yes		P27708	P27708	CAD	CAD protein, Glutamine-dependent carbamoyl-phosphate synthase, 6.3.5.5, Aspartate carbamoyltransferase, 2.1.3.2, Dihydroorotase, 3.5.2.3	31	2.95343e+09	3.08155e+09	1.74089e+09		Q86V81	Q86V81	ALYREF	THO complex subunit 4, Tho4, Ally of AML-1 and LEF-1, Aly/REF export factor, Transcriptional coactivator Aly/REF, bZIP-enhancing factor BEF	20	7.4344e+09
P83731	P83731	RPL24	60S ribosomal protein L24, 60S ribosomal protein L30, Large ribosomal subunit protein eL24	5.69076	0.20344	0.222864	0.16483	0.199577	0.218631	0.1617	0.107	0.144531	0.115995	0.00261845	0.00279192	0.00208916	2.44714	1.93171	1.80109	2.05998	0.341594	0.313863					Q5QJE6	Q5QJE6	DNTTIP2	Deoxynucleotidyltransferase terminal-interacting protein 2, Estrogen receptor-binding protein, LPTS-interacting protein 2, LPTS-RP2, Terminal deoxynucleotidyltransferase-interacting factor 2, TdIF2, TdT-interacting factor 2	14	2.84962	Yes		Q9UG63	Q9UG63	ABCF2	ATP-binding cassette sub-family F member 2, Iron-inhibited ABC transporter 2	31	1.52483e+09	1.22208e+09	1.38739e+09		Q12905	Q12905	ILF2	Interleukin enhancer-binding factor 2, Nuclear factor of activated T-cells 45 kDa	20	2.58918e+09
Q96QR8	Q96QR8	PURB	Transcriptional activator protein Pur-beta, Purine-rich element-binding protein B	3.90485	0.00889747	0.00909685	0.00780035	0.00834064	0.00852754	0.00731218	0.00530462	0.00599094	0.00417361	0.000109429	0.000108897	9.44734e-05	2.0629	1.81769	2.26359	2.04806	0.22332	0.311343					P82675	P82675	MRPS5	28S ribosomal protein S5, mitochondrial, MRP-S5, S5mt, Mitochondrial small ribosomal subunit protein uS5m	14	2.69888	Yes		Q9Y678	Q9Y678	COPG1	Coatomer subunit gamma-1, Gamma-1-coat protein, Gamma-1-COP	31	1.72771e+09	1.32205e+09	1.34302e+09		O75369	O75369	FLNB	Filamin-B, FLN-B, ABP-278, ABP-280 homolog, Actin-binding-like protein, Beta-filamin, Filamin homolog 1, Fh1, Filamin-3, Thyroid autoantigen, Truncated actin-binding protein, Truncated ABP	20	7.68977e+10
Q6IQ49	Q6IQ49	SDE2	Splicing regulator SDE2, Replication stress response regulator SDE2	4.64321	0.00221516	0.00171657	0.001977	0.00212992	0.00165052	0.00190093	0.00135542	0.00112671	0.00111863	2.79446e-05	2.10771e-05	2.456e-05	2.06169	1.87067	2.19553	2.04263	0.163268	0.31019					Q7KZ85	Q7KZ85	SUPT6H	Transcription elongation factor SPT6, hSPT6, Histone chaperone suppressor of Ty6, Tat-cotransactivator 2 protein, Tat-CT2 protein	14	2.44422	Yes		Q9P2E9	Q9P2E9	RRBP1	Ribosome-binding protein 1, 180 kDa ribosome receptor homolog, RRp, ES/130-related protein, Ribosome receptor protein	31	9.90298e+08	6.88957e+08	6.90636e+08		Q5QJE6	Q5QJE6	DNTTIP2	Deoxynucleotidyltransferase terminal-interacting protein 2, Estrogen receptor-binding protein, LPTS-interacting protein 2, LPTS-RP2, Terminal deoxynucleotidyltransferase-interacting factor 2, TdIF2, TdT-interacting factor 2	20	4.30838e+08
O75616	O75616	ERAL1	GTPase Era, mitochondrial, H-ERA, hERA, Conserved ERA-like GTPase, CEGA, ERA-W, ERA-like protein 1	2.03271	0.00911138	0.00952778	0.00831028	0.00732194	0.00765656	0.00667817	0.00524468	0.00433369	0.00431586	9.60638e-05	9.77742e-05	8.62819e-05	1.83164	2.25614	1.99918	2.02899	0.213814	0.30728					P09874	P09874	PARP1	Poly [ADP-ribose] polymerase, 2.4.2.30	14	1.92194	Yes		P31939	P31939	ATIC	Bifunctional purine biosynthesis protein ATIC, AICAR transformylase/inosine monophosphate cyclohydrolase, ATIC, Phosphoribosylaminoimidazolecarboxamide formyltransferase, 2.1.2.3, 5-aminoimidazole-4-carboxamide ribonucleotide formyltransferase, AICAR formyltransferase, AICAR transformylase, Inosine 5'-monophosphate cyclohydrolase, IMP cyclohydrolase, 3.5.4.10, IMP synthase, Inosinicase	31	2.21401e+09	1.76204e+09	1.8065e+09		Q9H307	Q9H307	PNN	Pinin, 140 kDa nuclear and cell adhesion-related phosphoprotein, Desmosome-associated protein, Domain-rich serine protein, DRS protein, DRSP, Melanoma metastasis clone A protein, Nuclear protein SDK3, SR-like protein	20	9.77486e+08
Q99848	Q99848	EBNA1BP2	Probable rRNA-processing protein EBP2, EBNA1-binding protein 2, Nucleolar protein p40	4.53217	0.0666274	0.0657755	0.0669447	0.0638671	0.0630505	0.0641712	0.0383603	0.0446408	0.0396765	0.000837937	0.000805155	0.000829092	2.18439	1.80363	2.08963	2.02588	0.198221	0.306614					Q14978	Q14978	NOLC1	Nucleolar and coiled-body phosphoprotein 1, 140 kDa nucleolar phosphoprotein, Nopp140, Hepatitis C virus NS5A-transactivated protein 13, HCV NS5A-transactivated protein 13, Nucleolar 130 kDa protein, Nucleolar phosphoprotein p130	14	1.49516	Yes		Q14008	Q14008	CKAP5	Cytoskeleton-associated protein 5, Colonic and hepatic tumor overexpressed gene protein, Ch-TOG	31	6.41608e+08	4.06696e+08	5.37798e+08		P26373	P26373	RPL13	60S ribosomal protein L13, Breast basic conserved protein 1, Large ribosomal subunit protein eL13	20	2.29222e+09
Q8TBF4	Q8TBF4	ZCRB1	Zinc finger CCHC-type and RNA-binding motif-containing protein 1, U11/U12 small nuclear ribonucleoprotein 31 kDa protein, U11/U12 snRNP 31 kDa protein, U11/U12-31K	3.26093	0.0029387	0.0035121	0.00288521	0.0026611	0.00318033	0.00261266	0.00217783	0.00177757	0.00156491	3.49136e-05	4.06128e-05	3.37555e-05	1.60313	2.28474	2.15702	2.01497	0.362328	0.304268					P49750	P49750	YLPM1	YLP motif-containing protein 1, Nuclear protein ZAP3, ZAP113	14	1.2095	Yes		Q9H0D6	Q9H0D6	XRN2	5'-3' exoribonuclease 2, 3.1.13.-, DHM1-like protein, DHP protein	31	9.21228e+08	6.40186e+08	8.82144e+08		P15311	P15311	EZR	Ezrin, Cytovillin, Villin-2, p81	20	6.30577e+08
Q99613	Q99613	EIF3C	Eukaryotic translation initiation factor 3 subunit C, eIF3c, Eukaryotic translation initiation factor 3 subunit 8, eIF3 p110	2.46427	0.13334	0.123174	0.12519	0.112884	0.104278	0.105984	0.0672792	0.0655885	0.0792301	0.00148104	0.00133163	0.00136932	2.20133	2.03028	1.72828	1.98663	0.239528	0.298117					Q86U38	Q86U38	NOP9	Nucleolar protein 9	14	0.843194	Yes		P54886	P54886	ALDH18A1	Delta-1-pyrroline-5-carboxylate synthase, P5CS, Aldehyde dehydrogenase family 18 member A1, Glutamate 5-kinase, GK, 2.7.2.11, Gamma-glutamyl kinase, Gamma-glutamyl phosphate reductase, GPR, 1.2.1.41, Glutamate-5-semialdehyde dehydrogenase, Glutamyl-gamma-semialdehyde dehydrogenase	31	2.51352e+09	2.10625e+09	1.942e+09		P15170	P15170	GSPT1	Eukaryotic peptide chain release factor GTP-binding subunit ERF3A, Eukaryotic peptide chain release factor subunit 3a, eRF3a, G1 to S phase transition protein 1 homolog	20	4.5423e+08
Q9UPT8	Q9UPT8	ZC3H4	Zinc finger CCCH domain-containing protein 4	1.01847	0.00214113	0.00216562	0.00243683	0.0014335	0.00144989	0.00163147	0.00110132	0.00120194	0.000782143	1.88075e-05	1.85151e-05	2.10786e-05	1.70772	1.54044	2.69498	1.98105	0.623917	0.296895					Q99798	Q99798	ACO2	Aconitate hydratase, mitochondrial, Aconitase, 4.2.1.3, Citrate hydro-lyase	14	0.36646	Yes		P62937	P62937	PPIA	Peptidyl-prolyl cis-trans isomerase A, PPIase A, 5.2.1.8, Cyclophilin A, Cyclosporin A-binding protein, Rotamase A	31	6.39929e+10	7.4389e+10	6.91864e+10		P41252	P41252	IARS1	Isoleucine--tRNA ligase, cytoplasmic, 6.1.1.5, Isoleucyl-tRNA synthetase, IRS, IleRS	20	2.8024e+08
Q8N3C0	Q8N3C0	ASCC3	Activating signal cointegrator 1 complex subunit 3, 3.6.4.12, ASC-1 complex subunit p200, ASC1p200, Helicase, ATP binding 1, Trip4 complex subunit p200	1.75941	0.00734729	0.0062835	0.00580968	0.00567197	0.00485075	0.00448497	0.00308422	0.00306275	0.00387112	7.44163e-05	6.1944e-05	5.79458e-05	2.41281	2.0225	1.49687	1.97739	0.45963	0.296093					P04406	P04406	GAPDH	Glyceraldehyde-3-phosphate dehydrogenase, GAPDH, 1.2.1.12, Peptidyl-cysteine S-nitrosylase GAPDH, 2.6.99.-	14	-3.12546	Yes		Q8IWA0	Q8IWA0	WDR75	WD repeat-containing protein 75, U3 small nucleolar RNA-associated protein 17 homolog	31	7.83647e+08	9.4377e+08	7.39024e+08		P10809	P10809	HSPD1	60 kDa heat shock protein, mitochondrial, 5.6.1.7, 60 kDa chaperonin, Chaperonin 60, CPN60, Heat shock protein 60, HSP-60, Hsp60, HuCHA60, Mitochondrial matrix protein P1, P60 lymphocyte protein	20	6.90754e+08
Q9H501	Q9H501	ESF1	ESF1 homolog, ABT1-associated protein	1.55109	0.00641015	0.00692402	0.00515797	0.00477923	0.00516236	0.00384564	0.00271775	0.00351658	0.00287859	6.27035e-05	6.59233e-05	4.96856e-05	2.30718	1.87464	1.72604	1.96929	0.301912	0.294309					Q02413	Q02413	DSG1	Desmoglein-1, Cadherin family member 4, Desmosomal glycoprotein 1, DG1, DGI, Pemphigus foliaceus antigen	14	-10	No		P05023	P05023	ATP1A1	Sodium/potassium-transporting ATPase subunit alpha-1, Na(+)/K(+) ATPase alpha-1 subunit, 7.2.2.13, Sodium pump subunit alpha-1	31	6.19139e+09	6.24109e+09	5.18138e+09		P07355	P07355	ANXA2	Annexin A2, Annexin II, Annexin-2, Calpactin I heavy chain, Calpactin-1 heavy chain, Chromobindin-8, Lipocortin II, Placental anticoagulant protein IV, PAP-IV, Protein I, p36	20	4.52645e+08
Q6PK04	Q6PK04	CCDC137	Coiled-coil domain-containing protein 137	1.28741	0.0163431	0.0171296	0.0159158	0.0115934	0.0121513	0.0112904	0.00693393	0.00967444	0.00697734	0.000152105	0.000155173	0.000145871	2.19364	1.60395	2.09064	1.96274	0.314966	0.292863					P98160	P98160	HSPG2	Basement membrane-specific heparan sulfate proteoglycan core protein, HSPG, Perlecan, PLC	14	-10	No		P52701	P52701	MSH6	DNA mismatch repair protein Msh6, hMSH6, G/T mismatch-binding protein, GTBP, GTMBP, MutS protein homolog 6, MutS-alpha 160 kDa subunit, p160	31	1.38401e+09	1.45387e+09	1.15528e+09		Q96P11	Q96P11	NSUN5	28S rRNA (cytosine-C(5))-methyltransferase, 2.1.1.-, NOL1-related protein, NOL1R, NOL1/NOP2/Sun domain family member 5, Williams-Beuren syndrome chromosomal region 20A protein	19	1.7073e+09
Q8NE71	Q8NE71	ABCF1	ATP-binding cassette sub-family F member 1, ATP-binding cassette 50, TNF-alpha-stimulated ABC protein	3.19298	0.051572	0.050967	0.0512498	0.0464885	0.0459431	0.046198	0.0306086	0.0306553	0.0303648	0.000609929	0.000586694	0.000596879	1.99267	1.91384	1.96569	1.9574	0.0400641	0.29168					Q13151	Q13151	HNRNPA0	Heterogeneous nuclear ribonucleoprotein A0, hnRNP A0	13	5.03463	Yes		Q16881	Q16881	TXNRD1	Thioredoxin reductase 1, cytoplasmic, TR, 1.8.1.9, Gene associated with retinoic and interferon-induced mortality 12 protein, GRIM-12, Gene associated with retinoic and IFN-induced mortality 12 protein, KM-102-derived reductase-like factor, Peroxidase TXNRD1, 1.11.1.2, Thioredoxin reductase TR1	31	3.82448e+09	3.04254e+09	3.37338e+09		Q5VYS8	Q5VYS8	TUT7	Terminal uridylyltransferase 7, TUTase 7, 2.7.7.52, Zinc finger CCHC domain-containing protein 6	19	5.71556e+08
Q96MU7	Q96MU7	YTHDC1	YTH domain-containing protein 1, Splicing factor YT521, YT521-B	4.04319	0.011951	0.0101231	0.0113305	0.0112676	0.00954417	0.0106825	0.00684721	0.00657498	0.0074981	0.00014783	0.000121879	0.000138018	2.15899	1.85368	1.84071	1.95113	0.18013	0.290285					Q13242	Q13242	SRSF9	Serine/arginine-rich splicing factor 9, Pre-mRNA-splicing factor SRp30C, Splicing factor, arginine/serine-rich 9	13	4.79761	Yes		P23526	P23526	AHCY	Adenosylhomocysteinase, AdoHcyase, 3.13.2.1, S-adenosyl-L-homocysteine hydrolase	31	4.96599e+09	4.10217e+09	4.6226e+09		Q15365	Q15365	PCBP1	Poly(rC)-binding protein 1, Alpha-CP1, Heterogeneous nuclear ribonucleoprotein E1, hnRNP E1, Nucleic acid-binding protein SUB2.3	19	2.8895e+10
Q9BQG0	Q9BQG0	MYBBP1A	Myb-binding protein 1A	4.08355	0.128628	0.118278	0.110269	0.121464	0.111691	0.104128	0.0731477	0.0850997	0.0685604	0.0015936	0.00142629	0.00134533	2.17861	1.67602	1.96225	1.93896	0.252101	0.287569					Q9UN86	Q9UN86	G3BP2	Ras GTPase-activating protein-binding protein 2, G3BP-2, GAP SH3 domain-binding protein 2	13	4.66138	Yes		Q8N1F7	Q8N1F7	NUP93	Nuclear pore complex protein Nup93, 93 kDa nucleoporin, Nucleoporin Nup93	31	1.10052e+09	8.67658e+08	1.01166e+09		P84103	P84103	SRSF3	Serine/arginine-rich splicing factor 3, Pre-mRNA-splicing factor SRP20, Splicing factor, arginine/serine-rich 3	19	1.4005e+10
Q13595	Q13595	TRA2A	Transformer-2 protein homolog alpha, TRA-2 alpha, TRA2-alpha, Transformer-2 protein homolog A	5.38678	0.022441	0.0242102	0.0232824	0.0219171	0.0236451	0.0227389	0.0128547	0.0177756	0.0157104	0.000287553	0.000301947	0.000293787	2.23694	1.69866	1.87001	1.93521	0.274996	0.286727					Q8IXT5	Q8IXT5	RBM12B	RNA-binding protein 12B, RNA-binding motif protein 12B	13	4.42822	Yes		Q9UIG0	Q9UIG0	BAZ1B	Tyrosine-protein kinase BAZ1B, 2.7.10.2, Bromodomain adjacent to zinc finger domain protein 1B, Williams syndrome transcription factor, Williams-Beuren syndrome chromosomal region 10 protein, Williams-Beuren syndrome chromosomal region 9 protein, hWALp2	31	9.53732e+08	9.01085e+08	9.32397e+08		Q96EY7	Q96EY7	PTCD3	Pentatricopeptide repeat domain-containing protein 3, mitochondrial, 28S ribosomal protein S39, mitochondrial, MRP-S39, Mitochondrial small ribosomal subunit protein mS39, Transformation-related gene 15 protein, TRG-15	19	4.71734e+09
O43432	O43432	EIF4G3	Eukaryotic translation initiation factor 4 gamma 3, eIF-4-gamma 3, eIF-4G 3, eIF4G 3, eIF-4-gamma II, eIF4GII	10	0.000144602	0.000249644	8.30867e-05	0.000144461	0.000249401	8.30056e-05	0.000133308	8.76985e-05	0.000148631	1.89533e-06	3.18485e-06	1.07243e-06	1.42176	3.63159	0.721538	1.92496	1.51888	0.284422					P62241	P62241	RPS8	40S ribosomal protein S8, Small ribosomal subunit protein eS8	13	4.41779	Yes		P28288	P28288	ABCD3	ATP-binding cassette sub-family D member 3, 3.1.2.-, 7.6.2.-, 70 kDa peroxisomal membrane protein, PMP70	30	1.52331e+09	1.46721e+09	1.44801e+09		Q6PJT7	Q6PJT7	ZC3H14	Zinc finger CCCH domain-containing protein 14, Mammalian suppressor of tau pathology-2, MSUT-2, Renal carcinoma antigen NY-REN-37	19	5.04424e+08
O60832	O60832	DKC1	H/ACA ribonucleoprotein complex subunit DKC1, 5.4.99.-, CBF5 homolog, Dyskerin, Nopp140-associated protein of 57 kDa, Nucleolar protein NAP57, Nucleolar protein family A member 4, snoRNP protein DKC1	3.99723	0.0513903	0.0419858	0.0443884	0.0483618	0.0395116	0.0417726	0.0285621	0.0292964	0.0298722	0.000634507	0.000504563	0.000539702	2.2215	1.72227	1.8067	1.91682	0.267212	0.282582					Q9NW64	Q9NW64	RBM22	Pre-mRNA-splicing factor RBM22, RNA-binding motif protein 22, Zinc finger CCCH domain-containing protein 16	13	4.09403	Yes		Q5BKZ1	Q5BKZ1	ZNF326	DBIRD complex subunit ZNF326, Zinc finger protein 326, Zinc finger protein interacting with mRNPs and DBC1	30	1.22454e+09	1.39616e+09	1.19877e+09		Q969S3	Q969S3	ZNF622	Cytoplasmic 60S subunit biogenesis factor ZNF622, Zinc finger protein 622, Zinc finger-like protein 9	19	6.18107e+08
Q9BUJ2	Q9BUJ2	HNRNPUL1	Heterogeneous nuclear ribonucleoprotein U-like protein 1, Adenovirus early region 1B-associated protein 5, E1B-55 kDa-associated protein 5, E1B-AP5	4.24106	0.0973942	0.0919932	0.0989271	0.0925024	0.0873727	0.0939583	0.0523022	0.0588269	0.0793705	0.00121363	0.00111575	0.00121394	2.32042	1.89667	1.52946	1.91552	0.395817	0.282286					O43159	O43159	RRP8	Ribosomal RNA-processing protein 8, 2.1.1.-, Cerebral protein 1, Nucleomethylin	13	3.73913	Yes		P63244	P63244	RACK1	Receptor of activated protein C kinase 1, Cell proliferation-inducing gene 21 protein, Guanine nucleotide-binding protein subunit beta-2-like 1, Guanine nucleotide-binding protein subunit beta-like protein 12.3, Human lung cancer oncogene 7 protein, HLC-7, Receptor for activated C kinase, Small ribosomal subunit protein RACK1	30	1.06952e+10	9.3186e+09	1.02711e+10		Q12874	Q12874	SF3A3	Splicing factor 3A subunit 3, SF3a60, Spliceosome-associated protein 61, SAP 61	19	9.85026e+08
Q9BYD3	Q9BYD3	MRPL4	39S ribosomal protein L4, mitochondrial, L4mt, MRP-L4, Mitochondrial large ribosomal subunit protein uL4m	2.10658	0.00588015	0.00577804	0.00587416	0.00477208	0.00468922	0.00476722	0.00358949	0.00252968	0.00390139	6.26097e-05	5.98813e-05	6.15925e-05	1.74425	2.36715	1.57873	1.89671	0.415732	0.278001					O75152	O75152	ZC3H11A	Zinc finger CCCH domain-containing protein 11A	13	3.60107	Yes		Q03701	Q03701	CEBPZ	CCAAT/enhancer-binding protein zeta, CCAAT-box-binding transcription factor, CBF, CCAAT-binding factor	30	7.22116e+08	6.75694e+08	7.35999e+08		Q9UHB9	Q9UHB9	SRP68	Signal recognition particle subunit SRP68, SRP68, Signal recognition particle 68 kDa protein	19	7.31375e+08
Q9UKV8	Q9UKV8	AGO2	Protein argonaute-2, Argonaute2, hAgo2, 3.1.26.n2, Argonaute RISC catalytic component 2, Eukaryotic translation initiation factor 2C 2, eIF-2C 2, eIF2C 2, PAZ Piwi domain protein, PPD, Protein slicer	2.55623	0.00475636	0.00415455	0.00389707	0.0040652	0.00355084	0.00333078	0.00261635	0.00235567	0.00252598	5.33354e-05	4.53442e-05	4.30336e-05	2.03854	1.9249	1.70364	1.88903	0.170307	0.276238					Q13895	Q13895	BYSL	Bystin	13	3.35358	Yes		Q9Y262	Q9Y262	EIF3L	Eukaryotic translation initiation factor 3 subunit L, eIF3l, Eukaryotic translation initiation factor 3 subunit 6-interacting protein, Eukaryotic translation initiation factor 3 subunit E-interacting protein	30	3.40671e+09	2.85861e+09	3.24758e+09		Q969Z0	Q969Z0	TBRG4	FAST kinase domain-containing protein 4, Cell cycle progression restoration protein 2, Cell cycle progression protein 2, Protein TBRG4, Transforming growth factor beta regulator 4	19	6.24794e+08
Q6DKI1	Q6DKI1	RPL7L1	60S ribosomal protein L7-like 1, Large ribosomal subunit protein uL30-like 1	4.70515	0.02777	0.0271399	0.0214599	0.0267447	0.0261378	0.0206676	0.0170185	0.0177691	0.0155872	0.00035089	0.00033378	0.000267026	2.06181	1.87843	1.7131	1.88445	0.174433	0.275185					Q15050	Q15050	RRS1	Ribosome biogenesis regulatory protein homolog	13	3.2418	Yes		Q15459	Q15459	SF3A1	Splicing factor 3A subunit 1, SF3a120, Spliceosome-associated protein 114, SAP 114	30	2.28185e+09	1.75224e+09	2.02377e+09		Q8IWX8	Q8IWX8	CHERP	Calcium homeostasis endoplasmic reticulum protein, ERPROT 213-21, SR-related CTD-associated factor 6	19	9.30122e+08
Q8IVS2	Q8IVS2	MCAT	Malonyl-CoA-acyl carrier protein transacylase, mitochondrial, MCT, 2.3.1.39, Mitochondrial malonyl CoA:ACP acyltransferase, Mitochondrial malonyltransferase, [Acyl-carrier-protein] malonyltransferase	1.70019	0.00243635	0.00235195	0.00186046	0.00186301	0.00179848	0.00142264	0.00135422	0.000891076	0.00156472	2.44427e-05	2.29666e-05	1.83806e-05	1.80493	2.5774	1.17469	1.85234	0.702554	0.26772					Q16629	Q16629	SRSF7	Serine/arginine-rich splicing factor 7, Splicing factor 9G8, Splicing factor, arginine/serine-rich 7	13	3.23031	Yes		O00411	O00411	POLRMT	DNA-directed RNA polymerase, mitochondrial, MtRPOL, 2.7.7.6	30	5.85189e+08	4.64034e+08	5.52827e+08		Q9Y285	Q9Y285	FARSA	Phenylalanine--tRNA ligase alpha subunit, 6.1.1.20, CML33, Phenylalanyl-tRNA synthetase alpha subunit, PheRS	19	1.09539e+09
Q86U42	Q86U42	PABPN1	Polyadenylate-binding protein 2, PABP-2, Poly(A)-binding protein 2, Nuclear poly(A)-binding protein 1, Poly(A)-binding protein II, PABII, Polyadenylate-binding nuclear protein 1	4.82408	0.00796367	0.00832219	0.00761377	0.00769211	0.00803841	0.00735415	0.00475703	0.00603628	0.00552392	0.000100921	0.00010265	9.50156e-05	2.1215	1.70056	1.72007	1.84738	0.237598	0.266556					Q9UGP8	Q9UGP8	SEC63	Translocation protein SEC63 homolog	13	2.92309	Yes		P13797	P13797	PLS3	Plastin-3, T-plastin	30	2.90241e+09	1.94493e+09	2.29992e+09		Q86XP3	Q86XP3	DDX42	ATP-dependent RNA helicase DDX42, 3.6.4.13, DEAD box protein 42, RNA helicase-like protein, RHELP, RNA helicase-related protein, RNAHP, SF3b DEAD box protein, Splicing factor 3B-associated 125 kDa protein, SF3b125	19	3.9483e+08
P08621	P08621	SNRNP70	U1 small nuclear ribonucleoprotein 70 kDa, U1 snRNP 70 kDa, U1-70K, snRNP70	1.23386	0.0945047	0.0875297	0.0942249	0.0663107	0.0614166	0.0661144	0.0458207	0.0486995	0.0425054	0.000869997	0.00078429	0.000854198	1.8987	1.61047	2.00962	1.8396	0.206033	0.264722					Q15424	Q15424	SAFB	Scaffold attachment factor B1, SAF-B, SAF-B1, HSP27 estrogen response element-TATA box-binding protein, HSP27 ERE-TATA-binding protein	13	2.75689	Yes		O60610	O60610	DIAPH1	Protein diaphanous homolog 1, Diaphanous-related formin-1, DRF1	30	8.94782e+08	6.53001e+08	7.4607e+08		P46782	P46782	RPS5	40S ribosomal protein S5, Small ribosomal subunit protein uS7	19	3.02084e+09
Q86V81	Q86V81	ALYREF	THO complex subunit 4, Tho4, Ally of AML-1 and LEF-1, Aly/REF export factor, Transcriptional coactivator Aly/REF, bZIP-enhancing factor BEF	5.00246	0.127249	0.132574	0.118551	0.123399	0.128563	0.114965	0.0663468	0.106363	0.0978462	0.001619	0.00164175	0.00148535	2.44021	1.54353	1.51804	1.83393	0.525209	0.263382					Q9BYD1	Q9BYD1	MRPL13	39S ribosomal protein L13, mitochondrial, L13mt, MRP-L13, Mitochondrial large ribosomal subunit protein uL13m	13	2.6683	Yes		P62269	P62269	RPS18	40S ribosomal protein S18, Ke-3, Ke3, Small ribosomal subunit protein uS13	30	1.07261e+10	1.34639e+10	1.12056e+10		Q9BY44	Q9BY44	EIF2A	Eukaryotic translation initiation factor 2A, eIF-2A, 65 kDa eukaryotic translation initiation factor 2A	19	5.97665e+08
Q14562	Q14562	DHX8	ATP-dependent RNA helicase DHX8, 3.6.4.13, DEAH box protein 8, RNA helicase HRH1	0.817292	0.00797083	0.0069548	0.0060554	0.00508504	0.00443686	0.00386308	0.00362204	0.00309637	0.00276124	6.67157e-05	5.66587e-05	4.9911e-05	1.84194	1.82984	1.80756	1.82644	0.0174397	0.261606					Q9P2E9	Q9P2E9	RRBP1	Ribosome-binding protein 1, 180 kDa ribosome receptor homolog, RRp, ES/130-related protein, Ribosome receptor protein	13	2.4071	Yes		Q02878	Q02878	RPL6	60S ribosomal protein L6, Large ribosomal subunit protein eL6, Neoplasm-related protein C140, Tax-responsive enhancer element-binding protein 107, TaxREB107	30	1.26293e+10	1.61283e+10	1.25919e+10		P62829	P62829	RPL23	60S ribosomal protein L23, 60S ribosomal protein L17, Large ribosomal subunit protein uL14	19	1.5768e+09
Q13895	Q13895	BYSL	Bystin	3.35358	0.0149761	0.0162219	0.0197566	0.0136416	0.0147763	0.017996	0.011269	0.0100263	0.0115828	0.000178978	0.000188694	0.000232508	1.58823	1.88198	2.00737	1.82586	0.215133	0.261467					Q9BRJ2	Q9BRJ2	MRPL45	39S ribosomal protein L45, mitochondrial, L45mt, MRP-L45, Mitochondrial large ribosomal subunit protein mL45	13	2.17674	Yes		Q13435	Q13435	SF3B2	Splicing factor 3B subunit 2, Pre-mRNA-splicing factor SF3b 145 kDa subunit, SF3b145, Spliceosome-associated protein 145, SAP 145	30	1.51543e+09	1.25188e+09	1.20793e+09		P54136	P54136	RARS1	Arginine--tRNA ligase, cytoplasmic, 6.1.1.19, Arginyl-tRNA synthetase, ArgRS	19	3.21233e+08
Q53EP0	Q53EP0	FNDC3B	Fibronectin type III domain-containing protein 3B, Factor for adipocyte differentiation 104, HCV NS5A-binding protein 37	2.61658	0.000514857	0.000471328	0.000428128	0.000442677	0.00040525	0.000368107	0.000301711	0.000283873	0.000275834	5.80792e-06	5.17504e-06	4.75594e-06	1.92499	1.82301	1.7242	1.82407	0.100398	0.261041					O00267	O00267	SUPT5H	Transcription elongation factor SPT5, hSPT5, DRB sensitivity-inducing factor 160 kDa subunit, DSIF p160, DRB sensitivity-inducing factor large subunit, DSIF large subunit, Tat-cotransactivator 1 protein, Tat-CT1 protein	13	2.1149	Yes		Q9BXP5	Q9BXP5	SRRT	Serrate RNA effector molecule homolog, Arsenite-resistance protein 2	30	1.27833e+09	1.0927e+09	1.22536e+09		P49792	P49792	RANBP2	E3 SUMO-protein ligase RanBP2, 2.3.2.-, 358 kDa nucleoporin, Nuclear pore complex protein Nup358, Nucleoporin Nup358, Ran-binding protein 2, RanBP2, p270	19	3.08243e+08
Q9NYY8	Q9NYY8	FASTKD2	FAST kinase domain-containing protein 2, mitochondrial	2.45976	0.00857688	0.00770826	0.00671144	0.00725761	0.0065226	0.00567911	0.0049835	0.00411977	0.00490143	9.52199e-05	8.32936e-05	7.33741e-05	1.9107	2.0218	1.49699	1.80983	0.276563	0.257639					P18621	P18621	RPL17	60S ribosomal protein L17, 60S ribosomal protein L23, Large ribosomal subunit protein uL22, PD-1	13	2.01398	Yes		Q8IX01	Q8IX01	SUGP2	SURP and G-patch domain-containing protein 2, Arginine/serine-rich-splicing factor 14, Splicing factor, arginine/serine-rich 14	30	4.54722e+08	4.39415e+08	4.19649e+08		P26639	P26639	TARS1	Threonine--tRNA ligase 1, cytoplasmic, 6.1.1.3, Threonyl-tRNA synthetase, ThrRS, Threonyl-tRNA synthetase 1	19	3.61299e+08
Q13123	Q13123	IK	Protein Red, Cytokine IK, IK factor, Protein RER	2.66516	0.0122671	0.0105854	0.0320609	0.0105965	0.00914379	0.0276947	0.0130887	0.0110794	0.0108555	0.000139026	0.000116766	0.000357815	1.06218	1.0539	3.29617	1.80408	1.29219	0.256257					Q9P2E3	Q9P2E3	ZNFX1	NFX1-type zinc finger-containing protein 1	13	1.89181	Yes		Q15020	Q15020	SART3	Squamous cell carcinoma antigen recognized by T-cells 3, SART-3, Tat-interacting protein of 110 kDa, Tip110, p110 nuclear RNA-binding protein	30	6.7411e+08	5.93172e+08	6.06747e+08		P02786	P02786	TFRC	Transferrin receptor protein 1, TR, TfR, TfR1, Trfr, T9, p90, CD71	19	2.95644e+08
O15371	O15371	EIF3D	Eukaryotic translation initiation factor 3 subunit D, eIF3d, Eukaryotic translation initiation factor 3 subunit 7, eIF-3-zeta, eIF3 p66	4.71527	0.0753588	0.0652848	0.0627286	0.0725952	0.0628906	0.0604282	0.0476276	0.0482466	0.0455881	0.000952449	0.000803113	0.000780732	1.99978	1.6646	1.71258	1.79232	0.181262	0.253416					P60228	P60228	EIF3E	Eukaryotic translation initiation factor 3 subunit E, eIF3e, Eukaryotic translation initiation factor 3 subunit 6, Viral integration site protein INT-6 homolog, eIF-3 p48	13	1.34754	Yes		O00429	O00429	DNM1L	Dynamin-1-like protein, 3.6.5.5, Dnm1p/Vps1p-like protein, DVLP, Dynamin family member proline-rich carboxyl-terminal domain less, Dymple, Dynamin-like protein, Dynamin-like protein 4, Dynamin-like protein IV, HdynIV, Dynamin-related protein 1	30	1.13533e+09	8.89781e+08	1.23192e+09		P02545	P02545	LMNA	Prelamin-A/C	19	3.27941e+08
Q9BYD6	Q9BYD6	MRPL1	39S ribosomal protein L1, mitochondrial, L1mt, MRP-L1, Mitochondrial large ribosomal subunit protein uL1m	3.76661	0.00303494	0.00296425	0.00292391	0.00282721	0.00276136	0.00272378	0.00211003	0.00204078	0.00190308	3.7093e-05	3.52626e-05	3.51913e-05	1.75793	1.72789	1.84917	1.77833	0.0631599	0.250013					O75127	O75127	PTCD1	Pentatricopeptide repeat-containing protein 1, mitochondrial	13	1.32159	Yes		O75083	O75083	WDR1	WD repeat-containing protein 1, Actin-interacting protein 1, AIP1, NORI-1	30	2.55455e+09	2.45199e+09	2.17893e+09		Q12986	Q12986	NFX1	Transcriptional repressor NF-X1, 2.3.2.-, Nuclear transcription factor, X box-binding protein 1	19	4.12032e+08
Q07065	Q07065	CKAP4	Cytoskeleton-associated protein 4, 63-kDa cytoskeleton-linking membrane protein, Climp-63, p63	4.10996	0.0163655	0.0191631	0.0247952	0.0154696	0.0181141	0.0234378	0.0233181	0.0100584	0.0140363	0.000202962	0.000231317	0.000302816	0.870405	2.29973	2.15738	1.77584	0.787353	0.249404					Q9Y2Z4	Q9Y2Z4	YARS2	Tyrosine--tRNA ligase, mitochondrial, 6.1.1.1, Tyrosyl-tRNA synthetase, TyrRS	13	1.27158	Yes		P33991	P33991	MCM4	DNA replication licensing factor MCM4, 3.6.4.12, CDC21 homolog, P1-CDC21	30	1.68445e+09	1.04717e+09	1.57995e+09		P35052	P35052	GPC1	Glypican-1	19	6.01323e+08
Q14258	Q14258	TRIM25	E3 ubiquitin/ISG15 ligase TRIM25, 6.3.2.n3, Estrogen-responsive finger protein, RING finger protein 147, RING-type E3 ubiquitin transferase, 2.3.2.27, RING-type E3 ubiquitin transferase TRIM25, Tripartite motif-containing protein 25, Ubiquitin/ISG15-conjugating enzyme TRIM25, Zinc finger protein 147	2.34996	0.0355133	0.0289576	0.0281623	0.0296896	0.0242089	0.0235441	0.0205105	0.016509	0.0205917	0.000389527	0.000309148	0.00030419	1.89916	1.87261	1.47725	1.74967	0.236301	0.242957					Q06830	Q06830	PRDX1	Peroxiredoxin-1, 1.11.1.24, Natural killer cell-enhancing factor A, NKEF-A, Proliferation-associated gene protein, PAG, Thioredoxin peroxidase 2, Thioredoxin-dependent peroxide reductase 2, Thioredoxin-dependent peroxiredoxin 1	13	0.645858	Yes		P49790	P49790	NUP153	Nuclear pore complex protein Nup153, 153 kDa nucleoporin, Nucleoporin Nup153	30	8.1813e+08	8.14397e+08	6.66288e+08		Q8IY67	Q8IY67	RAVER1	Ribonucleoprotein PTB-binding 1, Protein raver-1	18	1.81203e+09
Q5C9Z4	Q5C9Z4	NOM1	Nucleolar MIF4G domain-containing protein 1, SGD1 homolog	0.377302	0.00219176	0.00213055	0.00223465	0.00123837	0.00120379	0.00126261	0.000842343	0.00102762	0.00090424	1.62474e-05	1.53723e-05	1.63129e-05	1.92884	1.49591	1.80404	1.74293	0.222839	0.24128					Q92621	Q92621	NUP205	Nuclear pore complex protein Nup205, 205 kDa nucleoporin, Nucleoporin Nup205	13	0.629357	Yes		Q9Y265	Q9Y265	RUVBL1	RuvB-like 1, 3.6.4.12, 49 kDa TATA box-binding protein-interacting protein, 49 kDa TBP-interacting protein, 54 kDa erythrocyte cytosolic protein, ECP-54, INO80 complex subunit H, Nuclear matrix protein 238, NMP 238, Pontin 52, TIP49a, TIP60-associated protein 54-alpha, TAP54-alpha	30	2.49081e+09	2.00264e+09	2.17394e+09		Q00577	Q00577	PURA	Transcriptional activator protein Pur-alpha, Purine-rich single-stranded DNA-binding protein alpha	18	1.5403e+09
Q9NX24	Q9NX24	NHP2	H/ACA ribonucleoprotein complex subunit 2, Nucleolar protein family A member 2, snoRNP protein NHP2	4.82722	0.00973914	0.00922238	0.0095614	0.00940774	0.00890857	0.00923605	0.00712457	0.00821605	0.00568382	0.00012343	0.000113762	0.00011933	1.73245	1.38464	2.09947	1.73885	0.357458	0.240262					P35221	A0A384MDY0	CTNNA1	Catenin (Cadherin-associated protein), alpha 1, 102kDa, isoform CRA_b, Epididymis secretory sperm binding protein	13	0.549257	Yes		P62805	P62805	H4C1; H4C2; H4C3; H4C4; H4C5; H4C6; H4C8; H4C9; H4C11; H4C12; H4C13; H4C14; H4C15; H4C16	Histone H4	30	8.23218e+10	1.20091e+11	9.12764e+10		Q9P2E3	Q9P2E3	ZNFX1	NFX1-type zinc finger-containing protein 1	18	8.63808e+08
O76094	O76094	SRP72	Signal recognition particle subunit SRP72, SRP72, Signal recognition particle 72 kDa protein	1.87931	0.00989512	0.0107418	0.00903227	0.00778032	0.00844604	0.00710188	0.00705555	0.00423229	0.00762496	0.000102078	0.000107856	9.17563e-05	1.44677	2.54841	1.20337	1.73285	0.716701	0.238761					P31040	P31040	SDHA	Succinate dehydrogenase [ubiquinone] flavoprotein subunit, mitochondrial, 1.3.5.1, Flavoprotein subunit of complex II, Fp	13	0.387646	Yes		Q01518	Q01518	CAP1	Adenylyl cyclase-associated protein 1, CAP 1	30	2.53905e+09	1.78474e+09	2.05978e+09		Q13243	Q13243	SRSF5	Serine/arginine-rich splicing factor 5, Delayed-early protein HRS, Pre-mRNA-splicing factor SRP40, Splicing factor, arginine/serine-rich 5	18	2.86493e+09
Q9BRU9	Q9BRU9	UTP23	rRNA-processing protein UTP23 homolog	4.7437	0.00107012	0.00124025	0.000592057	0.00103161	0.00119562	0.000570754	0.0005658	0.000849773	0.000814104	1.35347e-05	1.52681e-05	7.37414e-06	2.39214	1.79673	0.905799	1.69822	0.748053	0.229995					O76031	O76031	CLPX	ATP-dependent Clp protease ATP-binding subunit clpX-like, mitochondrial	13	0.200564	Yes		P53618	P53618	COPB1	Coatomer subunit beta, Beta-coat protein, Beta-COP	29	1.36999e+09	1.19446e+09	1.1559e+09		P49750	P49750	YLPM1	YLP motif-containing protein 1, Nuclear protein ZAP3, ZAP113	18	2.39001e+08
P55265	P55265	ADAR	Double-stranded RNA-specific adenosine deaminase, DRADA, 3.5.4.37, 136 kDa double-stranded RNA-binding protein, p136, Interferon-inducible protein 4, IFI-4, K88DSRBP	3.53928	0.0475172	0.0472185	0.0465511	0.0437537	0.0434787	0.0428642	0.0361944	0.0312817	0.0323434	0.000574049	0.000555223	0.000553805	1.58602	1.77491	1.71227	1.69107	0.0962164	0.228161					Q96RP9	Q96RP9	GFM1	Elongation factor G, mitochondrial, EF-Gmt, Elongation factor G 1, mitochondrial, mEF-G 1, Elongation factor G1, hEFG1	13	0.198522	Yes		P26599	P26599	PTBP1	Polypyrimidine tract-binding protein 1, PTB, 57 kDa RNA-binding protein PPTB-1, Heterogeneous nuclear ribonucleoprotein I, hnRNP I	29	9.66514e+09	1.68859e+10	1.45377e+10		P62995	P62995	TRA2B	Transformer-2 protein homolog beta, TRA-2 beta, TRA2-beta, hTRA2-beta, Splicing factor, arginine/serine-rich 10, Transformer-2 protein homolog B	18	3.57759e+09
Q9NTZ6	Q9NTZ6	RBM12	RNA-binding protein 12, RNA-binding motif protein 12, SH3/WW domain anchor protein in the nucleus, SWAN	3.89501	0.00673211	0.00676976	0.00617748	0.00630809	0.00634337	0.00578839	0.00570682	0.00440019	0.0042141	8.27621e-05	8.10049e-05	7.4786e-05	1.45023	1.84094	1.77466	1.68861	0.209085	0.22753					Q9Y490	Q9Y490	TLN1	Talin-1	13	-0.31717	Yes		Q15424	Q15424	SAFB	Scaffold attachment factor B1, SAF-B, SAF-B1, HSP27 estrogen response element-TATA box-binding protein, HSP27 ERE-TATA-binding protein	29	1.24685e+09	1.47187e+09	1.49748e+09		Q6Y7W6	Q6Y7W6	GIGYF2	GRB10-interacting GYF protein 2, PERQ amino acid-rich with GYF domain-containing protein 2, Trinucleotide repeat-containing gene 15 protein	18	5.76156e+08
Q7KZ85	Q7KZ85	SUPT6H	Transcription elongation factor SPT6, hSPT6, Histone chaperone suppressor of Ty6, Tat-cotransactivator 2 protein, Tat-CT2 protein	2.44422	0.0109271	0.00999604	0.0110069	0.00923098	0.00844442	0.00929839	0.00731728	0.00588008	0.00771103	0.00012111	0.000107835	0.000120135	1.65513	1.83391	1.55797	1.68233	0.139968	0.225912					P22102	P22102	GART	Trifunctional purine biosynthetic protein adenosine-3, Phosphoribosylamine--glycine ligase, 6.3.4.13, Glycinamide ribonucleotide synthetase, GARS, Phosphoribosylglycinamide synthetase, Phosphoribosylformylglycinamidine cyclo-ligase, 6.3.3.1, AIR synthase, AIRS, Phosphoribosyl-aminoimidazole synthetase, Phosphoribosylglycinamide formyltransferase, 2.1.2.2, 5'-phosphoribosylglycinamide transformyla…	13	-1.01227	Yes		O94979	O94979	SEC31A	Protein transport protein Sec31A, ABP125, ABP130, SEC31-like protein 1, SEC31-related protein A, Web1-like protein	29	1.21827e+09	9.11224e+08	1.07614e+09		O76094	O76094	SRP72	Signal recognition particle subunit SRP72, SRP72, Signal recognition particle 72 kDa protein	18	5.78113e+08
Q9UQ80	Q9UQ80	PA2G4	Proliferation-associated protein 2G4, Cell cycle protein p38-2G4 homolog, hG4-1, ErbB3-binding protein 1	3.49487	0.225802	0.232336	0.233482	0.207405	0.213406	0.214459	0.173419	0.164076	0.154983	0.00272115	0.00272519	0.00277081	1.56912	1.66093	1.78782	1.67262	0.109819	0.223398					P50990	P50990	CCT8	T-complex protein 1 subunit theta, TCP-1-theta, CCT-theta, Chaperonin containing T-complex polypeptide 1 subunit 8, Renal carcinoma antigen NY-REN-15	13	-1.01593	Yes		P40429	P40429	RPL13A	60S ribosomal protein L13a, 23 kDa highly basic protein, Large ribosomal subunit protein uL13	29	5.54308e+09	6.62387e+09	5.56471e+09		O00566	O00566	MPHOSPH10	U3 small nucleolar ribonucleoprotein protein MPP10, M phase phosphoprotein 10	18	7.86082e+08
Q9ULX3	Q9ULX3	NOB1	RNA-binding protein NOB1, 3.1.-.-, Phosphorylation regulatory protein HP-10, Protein ART-4	3.26991	0.0158132	0.0167352	0.0153232	0.0143278	0.0151632	0.0138838	0.0106801	0.0110052	0.0120691	0.000187981	0.000193634	0.000179379	1.76011	1.75948	1.48626	1.66862	0.157925	0.222357					P07355	P07355	ANXA2	Annexin A2, Annexin II, Annexin-2, Calpactin I heavy chain, Calpactin-1 heavy chain, Chromobindin-8, Lipocortin II, Placental anticoagulant protein IV, PAP-IV, Protein I, p36	13	-1.05324	Yes		Q99848	Q99848	EBNA1BP2	Probable rRNA-processing protein EBP2, EBNA1-binding protein 2, Nucleolar protein p40	29	2.24105e+09	2.60799e+09	2.31797e+09		Q9H8H2	Q9H8H2	DDX31	Probable ATP-dependent RNA helicase DDX31, 3.6.4.13, DEAD box protein 31, Helicain	18	4.77361e+08
O60524	O60524	NEMF	Ribosome quality control complex subunit NEMF, Antigen NY-CO-1, Nuclear export mediator factor, Serologically defined colon cancer antigen 1	1.96528	0.00515255	0.00490631	0.0045527	0.00410206	0.00390602	0.0036245	0.00325051	0.00341821	0.00259442	5.3819e-05	4.98799e-05	4.68286e-05	1.65571	1.45924	1.80497	1.63997	0.173402	0.214837					P53621	P53621	COPA	Coatomer subunit alpha, Alpha-coat protein, Alpha-COP, HEP-COP, HEPCOP	13	-1.79597	Yes		O00267	O00267	SUPT5H	Transcription elongation factor SPT5, hSPT5, DRB sensitivity-inducing factor 160 kDa subunit, DSIF p160, DRB sensitivity-inducing factor large subunit, DSIF large subunit, Tat-cotransactivator 1 protein, Tat-CT1 protein	29	8.14033e+08	8.46308e+08	7.70864e+08		Q5T8P6	Q5T8P6	RBM26	RNA-binding protein 26, CTCL tumor antigen se70-2, RNA-binding motif protein 26	18	6.17296e+08
Q07955	Q07955	SRSF1	Serine/arginine-rich splicing factor 1, Alternative-splicing factor 1, ASF-1, Splicing factor, arginine/serine-rich 1, pre-mRNA-splicing factor SF2, P33 subunit	1.86008	0.0665241	0.0810209	0.128641	0.0521569	0.0635228	0.100858	0.0572371	0.0598948	0.0556417	0.000684299	0.000811186	0.00130309	1.19555	1.35435	2.34193	1.63061	0.621115	0.21235					P51116	P51116	FXR2	RNA-binding protein FXR2, FXR2P, FMR1 autosomal homolog 2	12	4.88232	Yes		Q16513	Q16513	PKN2	Serine/threonine-protein kinase N2, 2.7.11.13, PKN gamma, Protein kinase C-like 2, Protein-kinase C-related kinase 2	29	8.38099e+08	6.71473e+08	7.32583e+08		Q96D46	Q96D46	NMD3	60S ribosomal export protein NMD3, hNMD3	18	4.50019e+08
O00566	O00566	MPHOSPH10	U3 small nucleolar ribonucleoprotein protein MPP10, M phase phosphoprotein 10	3.48953	0.0134548	0.0125064	0.0143038	0.0123548	0.0114839	0.0131345	0.0101248	0.0100196	0.00935124	0.000162095	0.00014665	0.000169697	1.60097	1.46364	1.8147	1.62644	0.176912	0.211237					Q8TDN6	Q8TDN6	BRIX1	Ribosome biogenesis protein BRX1 homolog, Brix domain-containing protein 2	12	4.44131	Yes		Q71RC2	Q71RC2	LARP4	La-related protein 4, La ribonucleoprotein domain family member 4	29	9.51195e+08	7.40743e+08	8.78768e+08		Q15061	Q15061	WDR43	WD repeat-containing protein 43, U3 small nucleolar RNA-associated protein 5 homolog	18	5.67441e+08
O95793	O95793	STAU1	Double-stranded RNA-binding protein Staufen homolog 1	1.5458	0.000536773	0.000682439	0.000552061	0.000399829	0.000508332	0.000411217	0.000384096	0.00031732	0.000362929	5.24575e-06	6.4914e-06	5.31292e-06	1.36574	2.04569	1.4639	1.62511	0.367525	0.210883					P62424	P62424	RPL7A	60S ribosomal protein L7a, Large ribosomal subunit protein eL8, PLA-X polypeptide, Surfeit locus protein 3	12	4.20469	Yes		Q15050	Q15050	RRS1	Ribosome biogenesis regulatory protein homolog	29	9.95578e+08	1.13142e+09	1.04765e+09		Q969X6	Q969X6	UTP4	U3 small nucleolar RNA-associated protein 4 homolog, Cirhin, UTP4 small subunit processome component	18	5.35734e+08
Q8NHQ9	Q8NHQ9	DDX55	ATP-dependent RNA helicase DDX55, 3.6.4.13, DEAD box protein 55	2.07302	0.00278484	0.00321073	0.00204354	0.00225009	0.00259419	0.00165113	0.00192158	0.00170859	0.00153256	2.95211e-05	3.31278e-05	2.13326e-05	1.53629	1.93889	1.39196	1.62238	0.283448	0.210153					P62847	P62847	RPS24	40S ribosomal protein S24, Small ribosomal subunit protein eS24	12	4.12677	Yes		P52948	P52948	NUP98	Nuclear pore complex protein Nup98-Nup96, 3.4.21.-	29	8.44836e+08	6.23195e+08	6.23957e+08		P62888	P62888	RPL30	60S ribosomal protein L30, Large ribosomal subunit protein eL30	18	2.9364e+09
Q52LJ0	Q52LJ0	FAM98B	Protein FAM98B	5.53479	0.00608206	0.00555216	0.00563613	0.00595364	0.00543493	0.00551712	0.00493721	0.00389174	0.00485125	7.81117e-05	6.9404e-05	7.12812e-05	1.5821	1.78337	1.46934	1.6116	0.15908	0.207258					Q86TG7	Q86TG7	PEG10	Retrotransposon-derived protein PEG10, Embryonal carcinoma differentiation-regulated protein, Mammalian retrotransposon-derived protein 2, Myelin expression factor 3-like protein 1, MEF3-like protein 1, Paternally expressed gene 10 protein, Retrotransposon gag domain-containing protein 3, Retrotransposon-derived gag-like polyprotein, Ty3/Gypsy-like protein	12	4.07877	Yes		Q9BVJ6	Q9BVJ6	UTP14A	U3 small nucleolar RNA-associated protein 14 homolog A, Antigen NY-CO-16, Serologically defined colon cancer antigen 16	29	8.39909e+08	7.45266e+08	6.48664e+08		Q9UPN3	Q9UPN3	MACF1	Microtubule-actin cross-linking factor 1, isoforms 1/2/3/4/5, 620 kDa actin-binding protein, ABP620, Actin cross-linking family protein 7, Macrophin-1, Trabeculin-alpha	18	1.11385e+08
Q9BQ70	Q9BQ70	TCF25	Transcription factor 25, TCF-25, Nuclear localized protein 1	2.30254	0.00121157	0.00141282	0.000931598	0.00100737	0.0011747	0.000774586	0.000905756	0.000663311	0.000959679	1.32167e-05	1.5001e-05	1.00076e-05	1.45919	2.26153	1.04281	1.58784	0.61946	0.200808					Q96AG4	Q96AG4	LRRC59	Leucine-rich repeat-containing protein 59, Ribosome-binding protein p34, p34	12	4.02674	Yes		P31942	P31942	HNRNPH3	Heterogeneous nuclear ribonucleoprotein H3, hnRNP H3, Heterogeneous nuclear ribonucleoprotein 2H9, hnRNP 2H9	29	1.78204e+09	2.35203e+09	2.35107e+09		Q63HN8	Q63HN8	RNF213	E3 ubiquitin-protein ligase RNF213, 2.3.2.27, 3.6.4.-, ALK lymphoma oligomerization partner on chromosome 17, E3 ubiquitin-lipopolysaccharide ligase RNF213, 2.3.2.-, Mysterin, RING finger protein 213	18	7.43896e+07
Q16540	Q16540	MRPL23	39S ribosomal protein L23, mitochondrial, L23mt, MRP-L23, L23 mitochondrial-related protein, Mitochondrial large ribosomal subunit protein uL23m, Ribosomal protein L23-like	10	0.00519178	0.00571357	0.00540578	0.00518672	0.00570799	0.0054005	0.00432934	0.00413442	0.00491547	6.80497e-05	7.2891e-05	6.97745e-05	1.57183	1.76303	1.41949	1.58478	0.172136	0.199969					Q9ULX6	Q9ULX6	AKAP8L	A-kinase anchor protein 8-like, AKAP8-like protein, Helicase A-binding protein 95, HAP95, Homologous to AKAP95 protein, HA95, Neighbor of A-kinase-anchoring protein 95, Neighbor of AKAP95	12	3.59964	Yes		Q9NSD9	Q9NSD9	FARSB	Phenylalanine--tRNA ligase beta subunit, 6.1.1.20, Phenylalanyl-tRNA synthetase beta subunit, PheRS	29	2.49559e+09	2.41921e+09	2.56128e+09		P39019	P39019	RPS19	40S ribosomal protein S19, Small ribosomal subunit protein eS19	18	1.48152e+09
Q9NX05	Q9NX05	FAM120C	Constitutive coactivator of PPAR-gamma-like protein 2, Protein FAM120C, Tumor antigen BJ-HCC-21	3.22155	0.000888861	0.000837982	0.000787774	0.000802797	0.000756844	0.000711497	0.000942107	0.000689235	0.000416896	1.05327e-05	9.6649e-06	9.19255e-06	1.11799	1.40226	2.205	1.57509	0.563732	0.197304					P08865	P08865	RPSA	40S ribosomal protein SA, 37 kDa laminin receptor precursor, 37LRP, 37/67 kDa laminin receptor, LRP/LR, 67 kDa laminin receptor, 67LR, Colon carcinoma laminin-binding protein, Laminin receptor 1, LamR, Laminin-binding protein precursor p40, LBP/p40, Multidrug resistance-associated protein MGr1-Ag, NEM/1CHD4, Small ribosomal subunit protein uS2	12	3.50946	Yes		P18669	P18669	PGAM1	Phosphoglycerate mutase 1, 5.4.2.11, 5.4.2.4, BPG-dependent PGAM 1, Phosphoglycerate mutase isozyme B, PGAM-B	29	7.74184e+09	4.56982e+09	6.68387e+09		O95347	O95347	SMC2	Structural maintenance of chromosomes protein 2, SMC protein 2, SMC-2, Chromosome-associated protein E, hCAP-E, XCAP-E homolog	18	1.21266e+08
Q9NV31	Q9NV31	IMP3	U3 small nucleolar ribonucleoprotein protein IMP3, U3 snoRNP protein IMP3, BRMS2	4.01128	0.00237449	0.00229106	0.00257235	0.00223584	0.00215728	0.00242215	0.00198469	0.0018577	0.00179632	2.93342e-05	2.75485e-05	3.12942e-05	1.47802	1.48294	1.74212	1.56769	0.151079	0.195261					Q9Y285	Q9Y285	FARSA	Phenylalanine--tRNA ligase alpha subunit, 6.1.1.20, CML33, Phenylalanyl-tRNA synthetase alpha subunit, PheRS	12	3.46961	Yes		P50454	P50454	SERPINH1	Serpin H1, 47 kDa heat shock protein, Arsenic-transactivated protein 3, AsTP3, Cell proliferation-inducing gene 14 protein, Collagen-binding protein, Colligin, Rheumatoid arthritis-related antigen RA-A47	29	6.52398e+09	4.54872e+09	6.0196e+09		P46940	P46940	IQGAP1	Ras GTPase-activating-like protein IQGAP1, p195	18	1.97093e+08
P82675	P82675	MRPS5	28S ribosomal protein S5, mitochondrial, MRP-S5, S5mt, Mitochondrial small ribosomal subunit protein uS5m	2.69888	0.0157778	0.0169115	0.0141906	0.0136721	0.0146545	0.0122968	0.00983445	0.0127728	0.0116865	0.000179379	0.000187138	0.000158874	1.82398	1.46513	1.35947	1.54953	0.243484	0.1902					Q15637	Q15637	SF1	Splicing factor 1, Mammalian branch point-binding protein, BBP, mBBP, Transcription factor ZFM1, Zinc finger gene in MEN1 locus, Zinc finger protein 162	12	3.35111	Yes		Q8WWI1	Q8WWI1	LMO7	LIM domain only protein 7, LMO-7, F-box only protein 20, LOMP	29	1.10137e+09	7.64157e+08	6.60665e+08		P06733	P06733	ENO1	Alpha-enolase, 4.2.1.11, 2-phospho-D-glycerate hydro-lyase, C-myc promoter-binding protein, Enolase 1, MBP-1, MPB-1, Non-neural enolase, NNE, Phosphopyruvate hydratase, Plasminogen-binding protein	18	8.35838e+08
Q9NZM5	Q9NZM5	NOP53	Ribosome biogenesis protein NOP53, Glioma tumor suppressor candidate region gene 2 protein, Protein interacting with carboxyl terminus 1, PICT-1, p60	4.74529	0.00837398	0.00994342	0.00704377	0.00807298	0.00958602	0.00679059	0.00629513	0.00877679	0.00571245	0.000105918	0.000122413	8.77344e-05	1.68253	1.39474	1.53585	1.53771	0.143904	0.186873					Q6PJT7	Q6PJT7	ZC3H14	Zinc finger CCCH domain-containing protein 14, Mammalian suppressor of tau pathology-2, MSUT-2, Renal carcinoma antigen NY-REN-37	12	3.30496	Yes		Q15717	Q15717	ELAVL1	ELAV-like protein 1, Hu-antigen R, HuR	28	3.81831e+09	5.22957e+09	4.43614e+09		Q86YZ3	Q86YZ3	HRNR	Hornerin	18	5.39466e+08
Q9H7B2	Q9H7B2	RPF2	Ribosome production factor 2 homolog, Brix domain-containing protein 1, Ribosome biogenesis protein RPF2 homolog	3.66898	0.0251354	0.0215745	0.0222706	0.0233033	0.020002	0.0206473	0.0153699	0.0187602	0.0213066	0.00030574	0.000255426	0.000266763	1.98921	1.36153	1.25202	1.53425	0.397792	0.185897					Q15061	Q15061	WDR43	WD repeat-containing protein 43, U3 small nucleolar RNA-associated protein 5 homolog	12	3.26216	Yes		Q99729	Q99729	HNRNPAB	Heterogeneous nuclear ribonucleoprotein A/B, hnRNP A/B, APOBEC1-binding protein 1, ABBP-1	28	2.81886e+09	3.06771e+09	3.01502e+09		P52756	P52756	RBM5	RNA-binding protein 5, Protein G15, Putative tumor suppressor LUCA15, RNA-binding motif protein 5, Renal carcinoma antigen NY-REN-9	17	9.57171e+08
P18583	P18583	SON	Protein SON, Bax antagonist selected in saccharomyces 1, BASS1, Negative regulatory element-binding protein, NRE-binding protein, Protein DBP-5, SON3	0.781022	0.0199118	0.019082	0.0260127	0.0125869	0.0120623	0.0164434	0.0118926	0.012262	0.0109966	0.00016514	0.000154036	0.000212449	1.3886	1.2562	1.93196	1.52558	0.358102	0.183436					Q9UHB9	Q9UHB9	SRP68	Signal recognition particle subunit SRP68, SRP68, Signal recognition particle 68 kDa protein	12	3.11651	Yes		Q9HAV4	Q9HAV4	XPO5	Exportin-5, Exp5, Ran-binding protein 21	28	9.47121e+08	7.96395e+08	8.92056e+08		P33240	P33240	CSTF2	Cleavage stimulation factor subunit 2, CF-1 64 kDa subunit, Cleavage stimulation factor 64 kDa subunit, CSTF 64 kDa subunit, CstF-64	17	2.2227e+09
Q14966	Q14966	ZNF638	Zinc finger protein 638, Cutaneous T-cell lymphoma-associated antigen se33-1, CTCL-associated antigen se33-1, Nuclear protein 220, Zinc finger matrin-like protein	0.828418	0.00699214	0.00744965	0.0102435	0.00447312	0.0047658	0.00655311	0.00481305	0.00524409	0.00389821	5.86873e-05	6.08593e-05	8.46662e-05	1.21934	1.16053	2.17193	1.51727	0.567717	0.181061					Q8IWX8	Q8IWX8	CHERP	Calcium homeostasis endoplasmic reticulum protein, ERPROT 213-21, SR-related CTD-associated factor 6	12	3.00256	Yes		P05455	P05455	SSB	Lupus La protein, La autoantigen, La ribonucleoprotein, Sjoegren syndrome type B antigen, SS-B	28	1.84793e+09	2.02566e+09	1.91557e+09		Q5JSZ5	Q5JSZ5	PRRC2B	Protein PRRC2B, HLA-B-associated transcript 2-like 1, Proline-rich coiled-coil protein 2B	17	2.94363e+08
Q9H8H2	Q9H8H2	DDX31	Probable ATP-dependent RNA helicase DDX31, 3.6.4.13, DEAD box protein 31, Helicain	4.04002	0.00817063	0.00806767	0.00678046	0.0077024	0.00760534	0.00639189	0.00586539	0.0068516	0.00585549	0.000101056	9.71202e-05	8.25833e-05	1.72291	1.41748	1.41036	1.51692	0.178433	0.180962					Q9UKV8	Q9UKV8	AGO2	Protein argonaute-2, Argonaute2, hAgo2, 3.1.26.n2, Argonaute RISC catalytic component 2, Eukaryotic translation initiation factor 2C 2, eIF-2C 2, eIF2C 2, PAZ Piwi domain protein, PPD, Protein slicer	12	2.55623	Yes		Q13148	Q13148	TARDBP	TAR DNA-binding protein 43, TDP-43	28	1.79281e+09	2.41188e+09	2.32402e+09		O43251	O43251	RBFOX2	RNA binding protein fox-1 homolog 2, Fox-1 homolog B, Hexaribonucleotide-binding protein 2, RNA-binding motif protein 9, RNA-binding protein 9, Repressor of tamoxifen transcriptional activity	17	1.33013e+09
Q12905	Q12905	ILF2	Interleukin enhancer-binding factor 2, Nuclear factor of activated T-cells 45 kDa	4.74542	0.0443171	0.0366616	0.0439079	0.0427243	0.035344	0.0423298	0.0330542	0.0356279	0.0350642	0.000560542	0.000451343	0.000546901	1.69583	1.26683	1.55971	1.50746	0.219223	0.178244					Q9BZZ5	Q9BZZ5	API5	Apoptosis inhibitor 5, API-5, Antiapoptosis clone 11 protein, AAC-11, Cell migration-inducing gene 8 protein, Fibroblast growth factor 2-interacting factor, FIF, Protein XAGL	12	2.26513	Yes		Q92973	Q92973	TNPO1	Transportin-1, Importin beta-2, Karyopherin beta-2, M9 region interaction protein, MIP	28	2.56371e+09	2.06903e+09	2.32467e+09		Q9NUL3	Q9NUL3	STAU2	Double-stranded RNA-binding protein Staufen homolog 2	17	6.97915e+08
Q9NSV4	Q9NSV4	DIAPH3	Protein diaphanous homolog 3, Diaphanous-related formin-3, DRF3, MDia2	1.14116	0.00152183	0.00161573	0.00126167	0.00104709	0.00111169	0.000868084	0.00109419	0.000913313	0.000660576	1.37378e-05	1.41963e-05	1.12156e-05	1.25552	1.55438	1.69786	1.50258	0.225671	0.176839					P62701	P62701	RPS4X	40S ribosomal protein S4, X isoform, SCR10, Single copy abundant mRNA protein, Small ribosomal subunit protein eS4	12	1.68569	Yes		Q13619	Q13619	CUL4A	Cullin-4A, CUL-4A	28	1.60986e+09	1.40374e+09	1.629e+09		Q01844	Q01844	EWSR1	RNA-binding protein EWS, EWS oncogene, Ewing sarcoma breakpoint region 1 protein	17	3.54009e+09
Q9H8H0	Q9H8H0	NOL11	Nucleolar protein 11	4.67134	0.0136459	0.0109047	0.00988778	0.0131306	0.0104929	0.00951439	0.0101554	0.00872334	0.0097841	0.000172273	0.000133995	0.000122926	1.69636	1.53605	1.25638	1.49627	0.222672	0.175009					A3KMH1	A3KMH1	VWA8	von Willebrand factor A domain-containing protein 8, PEX7-binding protein 2, P7BP2	12	1.27473	Yes		P52789	P52789	HK2	Hexokinase-2, 2.7.1.1, Hexokinase type II, HK II, Hexokinase-B, Muscle form hexokinase	28	1.46451e+09	1.14553e+09	1.26592e+09		Q86U38	Q86U38	NOP9	Nucleolar protein 9	17	5.87949e+08
Q15459	Q15459	SF3A1	Splicing factor 3A subunit 1, SF3a120, Spliceosome-associated protein 114, SAP 114	2.03338	0.0452264	0.0464473	0.0545412	0.0363474	0.0373286	0.0438335	0.0390587	0.029993	0.0346407	0.000476878	0.000476686	0.000566329	1.22093	1.58932	1.63487	1.48171	0.226987	0.170762					P0DMV9	P0DMV9	HSPA1B	Heat shock 70 kDa protein 1B, Heat shock 70 kDa protein 2, HSP70-2, HSP70.2	12	1.1536	Yes		Q9Y2W1	Q9Y2W1	THRAP3	Thyroid hormone receptor-associated protein 3, BCLAF1 and THRAP3 family member 2, Thyroid hormone receptor-associated protein complex 150 kDa component, Trap150	28	1.51796e+09	1.57895e+09	1.37261e+09		Q01130	Q01130	SRSF2	Serine/arginine-rich splicing factor 2, Protein PR264, Splicing component, 35 kDa, Splicing factor SC35, SC-35, Splicing factor, arginine/serine-rich 2	17	5.49176e+09
Q8IY37	Q8IY37	DHX37	Probable ATP-dependent RNA helicase DHX37, 3.6.4.13, DEAH box protein 37	3.09342	0.00360401	0.00353205	0.00448707	0.00322604	0.00316163	0.00401649	0.0031446	0.0033289	0.00279705	4.23256e-05	4.0374e-05	5.1893e-05	1.34598	1.21283	1.85527	1.47136	0.339078	0.167719					O15213	O15213	WDR46	WD repeat-containing protein 46, WD repeat-containing protein BING4	12	0.942242	Yes		P51659	P51659	HSD17B4	Peroxisomal multifunctional enzyme type 2, MFE-2, 17-beta-hydroxysteroid dehydrogenase 4, 17-beta-HSD 4, D-bifunctional protein, DBP, Multifunctional protein 2, MFP-2, Short chain dehydrogenase/reductase family 8C member 1	28	1.59474e+09	1.61727e+09	1.51076e+09		Q92615	Q92615	LARP4B	La-related protein 4B, La ribonucleoprotein domain family member 4B, La ribonucleoprotein domain family member 5, La-related protein 5	17	4.8307e+08
P62753	P62753	RPS6	40S ribosomal protein S6, Phosphoprotein NP33, Small ribosomal subunit protein eS6	4.46676	0.196778	0.20994	0.19326	0.188264	0.200857	0.184898	0.150762	0.192883	0.165618	0.00247002	0.00256494	0.00238889	1.63836	1.32979	1.44241	1.47019	0.156145	0.167372					Q15056	Q15056	EIF4H	Eukaryotic translation initiation factor 4H, eIF-4H, Williams-Beuren syndrome chromosomal region 1 protein	12	0.450088	Yes		Q9BQ52	Q9BQ52	ELAC2	Zinc phosphodiesterase ELAC protein 2, 3.1.26.11, ElaC homolog protein 2, Heredity prostate cancer protein 2, Ribonuclease Z 2, RNase Z 2, tRNA 3 endonuclease 2, tRNase Z 2	28	1.29314e+09	1.0287e+09	1.09203e+09		O95478	O95478	NSA2	Ribosome biogenesis protein NSA2 homolog, Hairy cell leukemia protein 1, TGF-beta-inducible nuclear protein 1	17	1.21488e+09
Q8WTT2	Q8WTT2	NOC3L	Nucleolar complex protein 3 homolog, NOC3 protein homolog, Factor for adipocyte differentiation 24, NOC3-like protein, Nucleolar complex-associated protein 3-like protein	3.32156	0.0242105	0.0207865	0.0191795	0.0220091	0.0188963	0.0174355	0.0183226	0.0156946	0.0174249	0.000288759	0.000241306	0.000225266	1.57597	1.53751	1.29278	1.46876	0.153607	0.166949					Q9NSE4	Q9NSE4	IARS2	Isoleucine--tRNA ligase, mitochondrial, 6.1.1.5, Isoleucyl-tRNA synthetase, IleRS	12	0.387393	Yes		P50914	P50914	RPL14	60S ribosomal protein L14, CAG-ISL 7, Large ribosomal subunit protein eL14	28	5.936e+09	7.0745e+09	7.73614e+09		Q13595	Q13595	TRA2A	Transformer-2 protein homolog alpha, TRA-2 alpha, TRA2-alpha, Transformer-2 protein homolog A	17	1.31109e+09
P18124	P18124	RPL7	60S ribosomal protein L7, Large ribosomal subunit protein uL30	4.64166	0.361481	0.357925	0.300521	0.347557	0.344139	0.288946	0.275103	0.323156	0.271632	0.00455995	0.00439465	0.00373318	1.65754	1.35992	1.37436	1.46394	0.167821	0.165523					P11142	P11142	HSPA8	Heat shock cognate 71 kDa protein, 3.6.4.10, Heat shock 70 kDa protein 8, Lipopolysaccharide-associated protein 1, LAP-1, LPS-associated protein 1	12	0.227426	Yes		O00231	O00231	PSMD11	26S proteasome non-ATPase regulatory subunit 11, 26S proteasome regulatory subunit RPN6, 26S proteasome regulatory subunit S9, 26S proteasome regulatory subunit p44.5	28	2.70584e+09	1.91415e+09	2.30755e+09		Q9NYY8	Q9NYY8	FASTKD2	FAST kinase domain-containing protein 2, mitochondrial	17	5.01096e+08
Q9P2D0	Q9P2D0	IBTK	Inhibitor of Bruton tyrosine kinase, IBtk	2.92959	0.00145691	0.00123974	0.00103784	0.00128787	0.0010959	0.000917424	0.000970642	0.000971223	0.000985224	1.68969e-05	1.39946e-05	1.18531e-05	1.74079	1.44093	1.20309	1.4616	0.269448	0.16483					O95373	O95373	IPO7	Importin-7, Imp7, Ran-binding protein 7, RanBP7	12	0.217931	Yes		Q92499	Q92499	DDX1	ATP-dependent RNA helicase DDX1, 3.6.4.13, DEAD box protein 1, DEAD box protein retinoblastoma, DBP-RB	28	2.00029e+09	1.52162e+09	1.61602e+09		Q15056	Q15056	EIF4H	Eukaryotic translation initiation factor 4H, eIF-4H, Williams-Beuren syndrome chromosomal region 1 protein	17	2.42062e+09
P82914	P82914	MRPS15	28S ribosomal protein S15, mitochondrial, MRP-S15, S15mt, Mitochondrial small ribosomal subunit protein uS15m	2.67215	0.00196431	0.00157956	0.00175455	0.00169792	0.00136535	0.00151661	0.0013174	0.00147056	0.00131533	2.22767e-05	1.74355e-05	1.95946e-05	1.69096	1.18564	1.48971	1.45544	0.254398	0.162993					P10809	P10809	HSPD1	60 kDa heat shock protein, mitochondrial, 5.6.1.7, 60 kDa chaperonin, Chaperonin 60, CPN60, Heat shock protein 60, HSP-60, Hsp60, HuCHA60, Mitochondrial matrix protein P1, P60 lymphocyte protein	12	-0.509875	Yes		P11310	P11310	ACADM	Medium-chain specific acyl-CoA dehydrogenase, mitochondrial, 1.3.8.7	28	2.21501e+09	1.49968e+09	1.85567e+09		Q8N163	Q8N163	CCAR2	Cell cycle and apoptosis regulator protein 2, Cell division cycle and apoptosis regulator protein 2, DBIRD complex subunit KIAA1967, Deleted in breast cancer gene 1 protein, DBC-1, DBC.1, NET35, p30 DBC	17	6.0764e+08
Q5T8P6	Q5T8P6	RBM26	RNA-binding protein 26, CTCL tumor antigen se70-2, RNA-binding motif protein 26	2.79014	0.0105658	0.0120278	0.0103142	0.00923121	0.0105086	0.00901142	0.00955709	0.00770003	0.00861317	0.000121113	0.000134195	0.000116428	1.26726	1.74278	1.35174	1.45393	0.253696	0.162543					P41250	P41250	GARS1	Glycine--tRNA ligase, 6.1.1.14, Diadenosine tetraphosphate synthetase, Ap4A synthetase, 2.7.7.-, Glycyl-tRNA synthetase, GlyRS, Glycyl-tRNA synthetase 1	12	-0.591574	Yes		O15226	O15226	NKRF	NF-kappa-B-repressing factor, NFkB-repressing factor, NRF, Protein ITBA4	28	7.46329e+08	7.13743e+08	7.46564e+08		O75821	O75821	EIF3G	Eukaryotic translation initiation factor 3 subunit G, eIF3g, Eukaryotic translation initiation factor 3 RNA-binding subunit, eIF-3 RNA-binding subunit, Eukaryotic translation initiation factor 3 subunit 4, eIF-3-delta, eIF3 p42, eIF3 p44	17	1.31861e+09
Q8WXH0	Q8WXH0	SYNE2	Nesprin-2, KASH domain-containing protein 2, KASH2, Nuclear envelope spectrin repeat protein 2, Nucleus and actin connecting element protein, Protein NUANCE, Synaptic nuclear envelope protein 2, Syne-2	0.527952	0.00224361	0.00390894	0.00214231	0.00132481	0.00230815	0.00126499	0.00205266	0.00106292	0.00222629	1.73814e-05	2.94751e-05	1.63437e-05	0.846777	2.77303	0.734124	1.45131	1.14603	0.16176					P15170	P15170	GSPT1	Eukaryotic peptide chain release factor GTP-binding subunit ERF3A, Eukaryotic peptide chain release factor subunit 3a, eRF3a, G1 to S phase transition protein 1 homolog	12	-0.810016	Yes		Q8TED0	Q8TED0	UTP15	U3 small nucleolar RNA-associated protein 15 homolog	28	6.37096e+08	8.41776e+08	5.78021e+08		Q9NU22	Q9NU22	MDN1	Midasin, Dynein-related AAA-ATPase MDN1, MIDAS-containing protein	17	1.05056e+08
Q92552	Q92552	MRPS27	28S ribosomal protein S27, mitochondrial, MRP-S27, S27mt, Mitochondrial ribosomal protein S27, Mitochondrial small ribosomal subunit protein mS27	2.02271	0.0957342	0.0964934	0.0823596	0.0768273	0.0774366	0.0660941	0.0599015	0.0806836	0.0592878	0.00100797	0.000988865	0.000853936	1.68272	1.22561	1.44032	1.44955	0.228696	0.161234					P58107	P58107	EPPK1	Epiplakin, 450 kDa epidermal antigen	12	-1.11352	Yes		Q9Y230	Q9Y230	RUVBL2	RuvB-like 2, 3.6.4.12, 48 kDa TATA box-binding protein-interacting protein, 48 kDa TBP-interacting protein, 51 kDa erythrocyte cytosolic protein, ECP-51, INO80 complex subunit J, Repressing pontin 52, Reptin 52, TIP49b, TIP60-associated protein 54-beta, TAP54-beta	28	2.83879e+09	2.25631e+09	2.32226e+09		P08708	P08708	RPS17	40S ribosomal protein S17, Small ribosomal subunit protein eS17	17	3.20526e+09
Q15029	Q15029	EFTUD2	116 kDa U5 small nuclear ribonucleoprotein component, Elongation factor Tu GTP-binding domain-containing protein 2, SNU114 homolog, hSNU114, U5 snRNP-specific protein, 116 kDa, U5-116 kDa	2.20207	0.105747	0.105265	0.107939	0.0868685	0.0864722	0.0886686	0.0792776	0.0857302	0.0709951	0.00113971	0.00110425	0.0011456	1.43762	1.28805	1.61363	1.44644	0.162967	0.160299					P35052	P35052	GPC1	Glypican-1	12	-10	No		Q03252	Q03252	LMNB2	Lamin-B2	28	1.59176e+09	1.70123e+09	1.51688e+09		P18621	P18621	RPL17	60S ribosomal protein L17, 60S ribosomal protein L23, Large ribosomal subunit protein uL22, PD-1	17	2.3756e+09
Q86UK7	Q86UK7	ZNF598	E3 ubiquitin-protein ligase ZNF598, 2.3.2.27, Zinc finger protein 598	3.00318	0.00240198	0.00201176	0.00224367	0.00213562	0.00178867	0.00199486	0.00197495	0.00143149	0.00196495	2.80193e-05	2.28413e-05	2.57736e-05	1.41874	1.59563	1.31167	1.44201	0.143405	0.158969					Q5D862	Q5D862	FLG2	Filaggrin-2, FLG-2, Intermediate filament-associated and psoriasis-susceptibility protein, Ifapsoriasin	12	-10	No		Q10471	Q10471	GALNT2	Polypeptide N-acetylgalactosaminyltransferase 2, 2.4.1.41, Polypeptide GalNAc transferase 2, GalNAc-T2, pp-GaNTase 2, Protein-UDP acetylgalactosaminyltransferase 2, UDP-GalNAc:polypeptide N-acetylgalactosaminyltransferase 2	28	1.35168e+09	1.35776e+09	1.40616e+09		P62750	P62750	RPL23A	60S ribosomal protein L23a, Large ribosomal subunit protein uL23	17	1.58263e+09
Q9P015	Q9P015	MRPL15	39S ribosomal protein L15, mitochondrial, L15mt, MRP-L15, Mitochondrial large ribosomal subunit protein uL15m	2.75991	0.00666019	0.00800846	0.00555171	0.00580341	0.00697824	0.00483753	0.00561618	0.00470227	0.00588022	7.61408e-05	8.91122e-05	6.25009e-05	1.35574	1.89509	1.0629	1.43791	0.422135	0.157732					P83731	P83731	RPL24	60S ribosomal protein L24, 60S ribosomal protein L30, Large ribosomal subunit protein eL24	11	5.69076	Yes		P14868	P14868	DARS1	Aspartate--tRNA ligase, cytoplasmic, 6.1.1.12, Aspartyl-tRNA synthetase, AspRS, Cell proliferation-inducing gene 40 protein	28	1.72573e+09	1.26076e+09	1.34902e+09		Q9BUQ8	Q9BUQ8	DDX23	Probable ATP-dependent RNA helicase DDX23, 3.6.4.13, 100 kDa U5 snRNP-specific protein, DEAD box protein 23, PRP28 homolog, U5-100kD	17	3.10973e+08
Q6UN15	Q6UN15	FIP1L1	Pre-mRNA 3'-end-processing factor FIP1, hFip1, FIP1-like 1 protein, Factor interacting with PAP, Rearranged in hypereosinophilia	0.527673	0.00309235	0.00274163	0.00365034	0.00182583	0.00161875	0.00215528	0.00198616	0.00164967	0.00151254	2.39549e-05	2.06714e-05	2.78462e-05	1.20609	1.25306	1.84102	1.43339	0.353797	0.156364					P49207	P49207	RPL34	60S ribosomal protein L34, Large ribosomal subunit protein eL34	11	5.38329	Yes		O95831	O95831	AIFM1	Apoptosis-inducing factor 1, mitochondrial, 1.6.99.-, Programmed cell death protein 8	28	2.09559e+09	1.7266e+09	1.72974e+09		P26641	P26641	EEF1G	Elongation factor 1-gamma, EF-1-gamma, eEF-1B gamma	17	9.87603e+08
Q8IY81	Q8IY81	FTSJ3	pre-rRNA 2'-O-ribose RNA methyltransferase FTSJ3, 2.1.1.-, Protein ftsJ homolog 3, Putative rRNA methyltransferase 3	2.33501	0.0287632	0.0325332	0.0263094	0.0240055	0.0271519	0.0219576	0.0206528	0.0266674	0.0192727	0.000314952	0.00034673	0.000283692	1.52498	1.3002	1.47198	1.43239	0.117507	0.156061					P35268	P35268	RPL22	60S ribosomal protein L22, EBER-associated protein, EAP, Epstein-Barr virus small RNA-associated protein, Heparin-binding protein HBp15, Large ribosomal subunit protein eL22	11	5.035	Yes		P62191	P62191	PSMC1	26S proteasome regulatory subunit 4, P26s4, 26S proteasome AAA-ATPase subunit RPT2, Proteasome 26S subunit ATPase 1	28	2.18599e+09	1.73861e+09	2.12187e+09		P62826	P62826	RAN	GTP-binding nuclear protein Ran, 3.6.5.-, Androgen receptor-associated protein 24, GTPase Ran, Ras-like protein TC4, Ras-related nuclear protein	17	1.15523e+09
P50750	P50750	CDK9	Cyclin-dependent kinase 9, 2.7.11.22, 2.7.11.23, C-2K, Cell division cycle 2-like protein kinase 4, Cell division protein kinase 9, Serine/threonine-protein kinase PITALRE, Tat-associated kinase complex catalytic subunit	5.03276	0.00232964	0.00191421	0.00164966	0.00226059	0.00185747	0.00160076	0.0018834	0.00148988	0.00191543	2.96589e-05	2.37198e-05	2.06818e-05	1.57475	1.59206	1.07975	1.41552	0.290919	0.150916					Q6DKI1	Q6DKI1	RPL7L1	60S ribosomal protein L7-like 1, Large ribosomal subunit protein uL30-like 1	11	4.70515	Yes		Q07955	Q07955	SRSF1	Serine/arginine-rich splicing factor 1, Alternative-splicing factor 1, ASF-1, Splicing factor, arginine/serine-rich 1, pre-mRNA-splicing factor SF2, P33 subunit	27	3.34385e+09	3.49915e+09	3.25068e+09		Q13428	Q13428	TCOF1	Treacle protein, Treacher Collins syndrome protein	17	2.02677e+08
P78563	P78563	ADARB1	Double-stranded RNA-specific editase 1, 3.5.4.37, RNA-editing deaminase 1, RNA-editing enzyme 1, dsRNA adenosine deaminase	10	0.000580966	0.00109115	0.00100987	0.000580399	0.00109008	0.00100889	0.00109472	0.000700608	0.000850314	7.61484e-06	1.39204e-05	1.30348e-05	0.695594	1.9869	1.53294	1.40515	0.655069	0.147721					P30086	P30086	PEBP1	Phosphatidylethanolamine-binding protein 1, PEBP-1, HCNPpp, Neuropolypeptide h3, Prostatic-binding protein, Raf kinase inhibitor protein, RKIP	11	4.63436	Yes		P38159	P38159	RBMX	RNA-binding motif protein, X chromosome, Glycoprotein p43, Heterogeneous nuclear ribonucleoprotein G, hnRNP G	27	7.85947e+09	8.79425e+09	6.73455e+09		P30101	P30101	PDIA3	Protein disulfide-isomerase A3, 5.3.4.1, 58 kDa glucose-regulated protein, 58 kDa microsomal protein, p58, Disulfide isomerase ER-60, Endoplasmic reticulum resident protein 57, ER protein 57, ERp57, Endoplasmic reticulum resident protein 60, ER protein 60, ERp60	17	4.62535e+08
P61353	P61353	RPL27	60S ribosomal protein L27, Large ribosomal subunit protein eL27	5.29526	0.266819	0.26831	0.211391	0.260193	0.261647	0.206141	0.209556	0.263563	0.203985	0.00341373	0.00334123	0.00266334	1.62903	1.26772	1.30566	1.4008	0.19856	0.146377					P78316	P78316	NOP14	Nucleolar protein 14, Nucleolar complex protein 14	11	4.26932	Yes		Q13045	Q13045	FLII	Protein flightless-1 homolog	27	8.66281e+08	7.94059e+08	8.75949e+08		P08195	P08195	SLC3A2	4F2 cell-surface antigen heavy chain, 4F2hc, 4F2 heavy chain antigen, Lymphocyte activation antigen 4F2 large subunit, Solute carrier family 3 member 2, CD98	17	4.95481e+08
Q8IXZ2	Q8IXZ2	ZC3H3	Zinc finger CCCH domain-containing protein 3, Smad-interacting CPSF-like factor	10	0.000269008	0.000240228	0.000220415	0.000268745	0.000239994	0.0002202	0.000184943	0.000265957	0.000249869	3.52594e-06	3.06472e-06	2.84498e-06	1.9065	1.15234	1.13859	1.39914	0.439437	0.145862					P46782	P46782	RPS5	40S ribosomal protein S5, Small ribosomal subunit protein uS7	11	4.05975	Yes		Q08945	Q08945	SSRP1	FACT complex subunit SSRP1, Chromatin-specific transcription elongation factor 80 kDa subunit, Facilitates chromatin transcription complex 80 kDa subunit, FACT 80 kDa subunit, FACTp80, Facilitates chromatin transcription complex subunit SSRP1, Recombination signal sequence recognition protein 1, Structure-specific recognition protein 1, hSSRP1, T160	27	2.24494e+09	2.14955e+09	2.17206e+09		P62937	P62937	PPIA	Peptidyl-prolyl cis-trans isomerase A, PPIase A, 5.2.1.8, Cyclophilin A, Cyclosporin A-binding protein, Rotamase A	17	1.4305e+09
Q9BX10	Q9BX10	GTPBP2	GTP-binding protein 2	3.46797	0.000214178	0.000234876	0.000257345	0.000196427	0.000215409	0.000236016	0.000267789	0.000195013	0.000167611	2.57712e-06	2.75077e-06	3.04932e-06	0.962368	1.41056	1.81929	1.3974	0.428611	0.145322					Q5JSZ5	Q5JSZ5	PRRC2B	Protein PRRC2B, HLA-B-associated transcript 2-like 1, Proline-rich coiled-coil protein 2B	11	3.80401	Yes		Q9P258	Q9P258	RCC2	Protein RCC2, RCC1-like protein TD-60, Telophase disk protein of 60 kDa	27	2.47901e+09	2.41622e+09	2.47658e+09		P50991	P50991	CCT4	T-complex protein 1 subunit delta, TCP-1-delta, CCT-delta, Stimulator of TAR RNA-binding	17	3.36109e+08
Q8NEJ9	Q8NEJ9	NGDN	Neuroguidin, Centromere accumulated nuclear protein 1, CANu1, EIF4E-binding protein	1.65666	0.00186881	0.00195327	0.00190928	0.0014188	0.00148293	0.00144953	0.00123674	0.00145523	0.0013842	1.86147e-05	1.8937e-05	1.87279e-05	1.50515	1.3013	1.35297	1.38647	0.10597	0.141912					Q92615	Q92615	LARP4B	La-related protein 4B, La ribonucleoprotein domain family member 4B, La ribonucleoprotein domain family member 5, La-related protein 5	11	3.80219	Yes		Q9BXJ9	Q9BXJ9	NAA15	N-alpha-acetyltransferase 15, NatA auxiliary subunit, Gastric cancer antigen Ga19, N-terminal acetyltransferase, NMDA receptor-regulated protein 1, Protein tubedown-1, Tbdn100	27	1.70809e+09	1.51733e+09	1.64435e+09		Q08945	Q08945	SSRP1	FACT complex subunit SSRP1, Chromatin-specific transcription elongation factor 80 kDa subunit, Facilitates chromatin transcription complex 80 kDa subunit, FACT 80 kDa subunit, FACTp80, Facilitates chromatin transcription complex subunit SSRP1, Recombination signal sequence recognition protein 1, Structure-specific recognition protein 1, hSSRP1, T160	17	4.85337e+08
Q9Y3A4	Q9Y3A4	RRP7A	Ribosomal RNA-processing protein 7 homolog A, Gastric cancer antigen Zg14	3.82886	0.00327378	0.00366598	0.00241157	0.00305855	0.00342496	0.00225302	0.00271851	0.00285747	0.00253654	4.01281e-05	4.37367e-05	2.9109e-05	1.47611	1.53061	1.14759	1.38477	0.207204	0.141377					Q9NVS2	Q9NVS2	MRPS18A	39S ribosomal protein S18a, mitochondrial, MRP-S18-a, Mrps18a, S18mt-a, 39S ribosomal protein S18-3, mitochondrial, MRP-S18-3, Mitochondrial large ribosomal subunit protein bS18a, Mitochondrial large ribosomal subunit protein mL66	11	3.79709	Yes		P35580	P35580	MYH10	Myosin-10, Cellular myosin heavy chain, type B, Myosin heavy chain 10, Myosin heavy chain, non-muscle IIb, Non-muscle myosin heavy chain B, NMMHC-B, Non-muscle myosin heavy chain IIb, NMMHC II-b, NMMHC-IIB	27	9.73948e+08	1.0011e+09	8.64847e+08		Q15032	Q15032	R3HDM1	R3H domain-containing protein 1	16	4.51103e+08
Q9BVP2	Q9BVP2	GNL3	Guanine nucleotide-binding protein-like 3, E2-induced gene 3 protein, Novel nucleolar protein 47, NNP47, Nucleolar GTP-binding protein 3, Nucleostemin	1.06086	0.0453721	0.045434	0.0443886	0.0306703	0.0307122	0.0300055	0.0274876	0.0295983	0.0288394	0.000402395	0.000392195	0.000387671	1.46391	1.32506	1.34424	1.37774	0.0752425	0.139166					Q13247	Q13247	SRSF6	Serine/arginine-rich splicing factor 6, Pre-mRNA-splicing factor SRP55, Splicing factor, arginine/serine-rich 6	11	3.75277	Yes		Q9BY44	Q9BY44	EIF2A	Eukaryotic translation initiation factor 2A, eIF-2A, 65 kDa eukaryotic translation initiation factor 2A	27	1.64355e+09	1.40213e+09	1.4889e+09		P98179	P98179	RBM3	RNA-binding protein 3, RNA-binding motif protein 3, RNPL	16	1.0083e+10
Q14684	Q14684	RRP1B	Ribosomal RNA processing protein 1 homolog B, RRP1-like protein B	2.31209	0.0247975	0.0255303	0.0260265	0.020641	0.021251	0.021664	0.0204239	0.02102	0.0185246	0.00027081	0.000271375	0.000279899	1.32595	1.29103	1.51096	1.37598	0.118194	0.138612					Q9Y4P3	Q9Y4P3	TBL2	Transducin beta-like protein 2, WS beta-transducin repeats protein, WS-betaTRP, Williams-Beuren syndrome chromosomal region 13 protein	11	3.68591	Yes		Q9NVN8	Q9NVN8	GNL3L	Guanine nucleotide-binding protein-like 3-like protein	27	2.97482e+08	3.21508e+08	3.70043e+08		Q9NVS2	Q9NVS2	MRPS18A	39S ribosomal protein S18a, mitochondrial, MRP-S18-a, Mrps18a, S18mt-a, 39S ribosomal protein S18-3, mitochondrial, MRP-S18-3, Mitochondrial large ribosomal subunit protein bS18a, Mitochondrial large ribosomal subunit protein mL66	16	2.50766e+09
Q8N884	Q8N884	CGAS	Cyclic GMP-AMP synthase, cGAMP synthase, cGAS, h-cGAS, 2.7.7.86, 2'3'-cGAMP synthase, Mab-21 domain-containing protein 1	10	0.00113556	0.000917618	0.00114229	0.00113445	0.000916723	0.00114118	0.000933841	0.00106756	0.00104137	1.4884e-05	1.17065e-05	1.4744e-05	1.59385	1.09657	1.41584	1.36875	0.251958	0.136325					Q7Z739	Q7Z739	YTHDF3	YTH domain-containing family protein 3, DF3	11	3.52317	Yes		Q8IY81	Q8IY81	FTSJ3	pre-rRNA 2'-O-ribose RNA methyltransferase FTSJ3, 2.1.1.-, Protein ftsJ homolog 3, Putative rRNA methyltransferase 3	27	1.20656e+09	1.55795e+09	1.12595e+09		Q86W50	Q86W50	METTL16	RNA N6-adenosine-methyltransferase METTL16, Methyltransferase 10 domain-containing protein, Methyltransferase-like protein 16, N6-adenosine-methyltransferase METTL16, 2.1.1.348, U6 small nuclear RNA (adenine-(43)-N(6))-methyltransferase, 2.1.1.346	16	5.30548e+08
Q6P6C2	Q6P6C2	ALKBH5	RNA demethylase ALKBH5, 1.14.11.53, Alkylated DNA repair protein alkB homolog 5, Alpha-ketoglutarate-dependent dioxygenase alkB homolog 5	3.84506	0.000147547	6.65127e-05	9.67409e-05	0.000137947	6.21855e-05	9.04471e-05	7.28718e-05	7.60789e-05	0.00021261	1.80987e-06	7.94108e-07	1.16858e-06	2.48364	1.0438	0.549634	1.35902	1.0048	0.133227					Q9NVU7	Q9NVU7	SDAD1	Protein SDA1 homolog, Nucleolar protein 130, SDA1 domain-containing protein 1, hSDA	11	3.16408	Yes		Q9Y2X3	Q9Y2X3	NOP58	Nucleolar protein 58, Nucleolar protein 5	27	1.81101e+09	1.91778e+09	1.68743e+09		P51116	P51116	FXR2	RNA-binding protein FXR2, FXR2P, FMR1 autosomal homolog 2	16	8.42427e+08
Q9H9Y2	Q9H9Y2	RPF1	Ribosome production factor 1, Brix domain-containing protein 5, Ribosome biogenesis protein RPF1	2.88491	0.00432697	0.00368054	0.00414268	0.00381103	0.00324168	0.00364872	0.00317621	0.00347363	0.00382171	5.00007e-05	4.13963e-05	4.71414e-05	1.57423	1.19173	1.23352	1.33316	0.209814	0.124882					Q8IY37	Q8IY37	DHX37	Probable ATP-dependent RNA helicase DHX37, 3.6.4.13, DEAH box protein 37	11	3.09342	Yes		P05198	P05198	EIF2S1	Eukaryotic translation initiation factor 2 subunit 1, Eukaryotic translation initiation factor 2 subunit alpha, eIF-2-alpha, eIF-2A, eIF-2alpha	27	2.46038e+09	1.71429e+09	2.01656e+09		O43159	O43159	RRP8	Ribosomal RNA-processing protein 8, 2.1.1.-, Cerebral protein 1, Nucleomethylin	16	9.61989e+08
O15230	O15230	LAMA5	Laminin subunit alpha-5, Laminin-10 subunit alpha, Laminin-11 subunit alpha, Laminin-15 subunit alpha	0.136531	0.000579564	0.00056345	0.00057996	0.000303484	0.000295046	0.000303691	0.000321873	0.000224186	0.000363514	3.9817e-06	3.76773e-06	3.92369e-06	1.23704	1.68063	1.07938	1.33235	0.311749	0.124618					P26641	P26641	EEF1G	Elongation factor 1-gamma, EF-1-gamma, eEF-1B gamma	11	3.0847	Yes		Q9H7B2	Q9H7B2	RPF2	Ribosome production factor 2 homolog, Brix domain-containing protein 1, Ribosome biogenesis protein RPF2 homolog	27	8.97925e+08	1.096e+09	1.24477e+09		Q76FK4	Q76FK4	NOL8	Nucleolar protein 8, Nucleolar protein Nop132	16	2.71616e+08
Q8N983	Q8N983	MRPL43	39S ribosomal protein L43, mitochondrial, L43mt, MRP-L43, Mitochondrial large ribosomal subunit protein mL43, Mitochondrial ribosomal protein bMRP36a	-1.16103	0.0116486	0.0133687	0.00951626	0.00359951	0.00413103	0.0029406	0.00390039	0.00321206	0.00344405	4.72256e-05	5.27532e-05	3.79925e-05	1.21079	1.64235	1.10313	1.31876	0.285361	0.120165					P62899	P62899	RPL31	60S ribosomal protein L31, Large ribosomal subunit protein eL31	11	3.05987	Yes		P42166	P42166	TMPO	Lamina-associated polypeptide 2, isoform alpha, Thymopoietin isoform alpha, TP alpha, Thymopoietin-related peptide isoform alpha, TPRP isoform alpha	27	2.50019e+09	2.10075e+09	1.90715e+09		Q9GZT3	Q9GZT3	SLIRP	SRA stem-loop-interacting RNA-binding protein, mitochondrial	16	3.26962e+09
Q9HC36	Q9HC36	MRM3	rRNA methyltransferase 3, mitochondrial, 2.1.1.-, 16S rRNA (guanosine(1370)-2'-O)-methyltransferase, 16S rRNA [Gm1370] 2'-O-methyltransferase, RNA methyltransferase-like protein 1	3.00829	0.004231	0.00390778	0.00376347	0.00376328	0.0034758	0.00334744	0.00443616	0.00451857	0.00232508	4.93743e-05	4.43859e-05	4.32489e-05	1.113	0.982301	1.86011	1.31847	0.473603	0.120069					O75521	O75521	ECI2	Enoyl-CoA delta isomerase 2, 5.3.3.8, DRS-1, Delta(3),delta(2)-enoyl-CoA isomerase, D3,D2-enoyl-CoA isomerase, Diazepam-binding inhibitor-related protein 1, DBI-related protein 1, Dodecenoyl-CoA isomerase, Hepatocellular carcinoma-associated antigen 88, Peroxisomal 3,2-trans-enoyl-CoA isomerase, pECI, Renal carcinoma antigen NY-REN-1	11	2.85503	Yes		Q9HB71	Q9HB71	CACYBP	Calcyclin-binding protein, CacyBP, hCacyBP, S100A6-binding protein, Siah-interacting protein	27	4.62861e+09	3.85042e+09	4.30249e+09		Q9ULX3	Q9ULX3	NOB1	RNA-binding protein NOB1, 3.1.-.-, Phosphorylation regulatory protein HP-10, Protein ART-4	16	9.23872e+08
O60333	O60333	KIF1B	Kinesin-like protein KIF1B, Klp	1.13266	0.000233213	0.000170374	0.000263526	0.000160165	0.000117009	0.000180984	0.000146623	0.000126453	0.000176326	2.10137e-06	1.4942e-06	2.33831e-06	1.43318	1.18163	1.32613	1.31364	0.126239	0.118478					Q9BXP5	Q9BXP5	SRRT	Serrate RNA effector molecule homolog, Arsenite-resistance protein 2	11	2.75042	Yes		P17812	P17812	CTPS1	CTP synthase 1, 6.3.4.2, CTP synthetase 1, UTP--ammonia ligase 1	27	2.12051e+09	2.15345e+09	2.42261e+09		P82675	P82675	MRPS5	28S ribosomal protein S5, mitochondrial, MRP-S5, S5mt, Mitochondrial small ribosomal subunit protein uS5m	16	9.21804e+08
Q96GA3	Q96GA3	LTV1	Protein LTV1 homolog	4.9702	0.00247077	0.00290662	0.00296842	0.00239439	0.00281676	0.00287665	0.002602	0.00310805	0.00236079	3.14143e-05	3.597e-05	3.71663e-05	1.20731	1.15732	1.57432	1.31298	0.227699	0.118259					Q9NUQ6	Q9NUQ6	SPATS2L	SPATS2-like protein, DNA polymerase-transactivated protein 6, Stress granule and nucleolar protein, SGNP	11	2.63797	Yes		Q9Y4L1	Q9Y4L1	HYOU1	Hypoxia up-regulated protein 1, 150 kDa oxygen-regulated protein, ORP-150, 170 kDa glucose-regulated protein, GRP-170	27	9.8038e+08	7.93208e+08	8.9234e+08		Q16630	Q16630	CPSF6	Cleavage and polyadenylation specificity factor subunit 6, Cleavage and polyadenylation specificity factor 68 kDa subunit, CPSF 68 kDa subunit, Cleavage factor Im complex 68 kDa subunit, CFIm68, Pre-mRNA cleavage factor Im 68 kDa subunit, Protein HPBRII-4/7	16	4.17467e+08
Q6IN84	Q6IN84	MRM1	rRNA methyltransferase 1, mitochondrial, 2.1.1.-, 16S rRNA (guanosine(1145)-2'-O)-methyltransferase, 16S rRNA [Gm1145] 2'-O-methyltransferase	2.46222	0.000882544	0.000776922	0.000806387	0.00074699	0.000657591	0.000682531	0.000659349	0.000759479	0.000657966	9.80051e-06	8.39744e-06	8.8183e-06	1.48639	1.10568	1.34024	1.31077	0.192057	0.117527					Q9NYL2	Q9NYL2	MAP3K20	Mitogen-activated protein kinase kinase kinase 20, 2.7.11.25, Human cervical cancer suppressor gene 4 protein, HCCS-4, Leucine zipper- and sterile alpha motif-containing kinase, MLK-like mitogen-activated protein triple kinase, Mitogen-activated protein kinase kinase kinase MLT, Mixed lineage kinase 7, Mixed lineage kinase-related kinase, MLK-related kinase, MRK, Sterile alpha motif- and leucine …	11	2.2896	Yes		P12814	P12814	ACTN1	Alpha-actinin-1, Alpha-actinin cytoskeletal isoform, F-actin cross-linking protein, Non-muscle alpha-actinin-1	27	1.78924e+09	9.24157e+08	1.4195e+09		Q9NXH9	Q9NXH9	TRMT1	tRNA (guanine(26)-N(2))-dimethyltransferase, 2.1.1.216, tRNA 2,2-dimethylguanosine-26 methyltransferase, tRNA(guanine-26,N(2)-N(2)) methyltransferase, tRNA(m(2,2)G26)dimethyltransferase	16	4.76131e+08
Q9H0D6	Q9H0D6	XRN2	5'-3' exoribonuclease 2, 3.1.13.-, DHM1-like protein, DHP protein	0.454583	0.0232654	0.0243189	0.0236279	0.0134504	0.0140595	0.01366	0.0157688	0.010958	0.0150996	0.000176469	0.000179539	0.000176487	1.11911	1.63843	1.16882	1.30878	0.28656	0.116868					P82933	P82933	MRPS9	28S ribosomal protein S9, mitochondrial, MRP-S9, S9mt, Mitochondrial small ribosomal subunit protein uS9m	11	1.29535	Yes		O95757	O95757	HSPA4L	Heat shock 70 kDa protein 4L, Heat shock 70-related protein APG-1, Heat-shock protein family A member 4-like protein, HSPA4-like protein, Osmotic stress protein 94	27	1.02436e+09	7.83313e+08	8.84044e+08		Q14683	Q14683	SMC1A	Structural maintenance of chromosomes protein 1A, SMC protein 1A, SMC-1-alpha, SMC-1A, Sb1.8	16	2.74144e+09
O60287	O60287	URB1	Nucleolar pre-ribosomal-associated protein 1, Nucleolar protein 254 kDa, URB1 ribosome biogenesis 1 homolog	0.789739	0.00939265	0.00862762	0.00776461	0.00595056	0.00546588	0.00491914	0.00552217	0.00526291	0.00556885	7.80713e-05	6.97993e-05	6.35553e-05	1.41378	1.32625	1.14126	1.29376	0.139132	0.111855					Q7L8L6	Q7L8L6	FASTKD5	FAST kinase domain-containing protein 5, mitochondrial	11	0.865593	Yes		P08237	P08237	PFKM	ATP-dependent 6-phosphofructokinase, muscle type, ATP-PFK, PFK-M, 2.7.1.11, 6-phosphofructokinase type A, Phosphofructo-1-kinase isozyme A, PFK-A, Phosphohexokinase	27	4.01734e+09	3.77182e+09	3.286e+09		Q14137	Q14137	BOP1	Ribosome biogenesis protein BOP1, Block of proliferation 1 protein	16	4.74594e+08
Q15056	Q15056	EIF4H	Eukaryotic translation initiation factor 4H, eIF-4H, Williams-Beuren syndrome chromosomal region 1 protein	0.450088	0.0414318	0.0424059	0.0910584	0.0239214	0.0244838	0.0525742	0.044245	0.0377854	0.0291329	0.000313849	0.000312658	0.000679258	0.709343	0.827458	2.33159	1.28946	0.904437	0.110409					Q14562	Q14562	DHX8	ATP-dependent RNA helicase DHX8, 3.6.4.13, DEAH box protein 8, RNA helicase HRH1	11	0.817292	Yes		P45974	P45974	USP5	Ubiquitin carboxyl-terminal hydrolase 5, 3.4.19.12, Deubiquitinating enzyme 5, Isopeptidase T, Ubiquitin thioesterase 5, Ubiquitin-specific-processing protease 5	27	1.16117e+09	8.11639e+08	9.2421e+08		Q9UNX4	Q9UNX4	WDR3	WD repeat-containing protein 3	16	3.24834e+08
P48200	P48200	IREB2	Iron-responsive element-binding protein 2, IRE-BP 2, Iron regulatory protein 2, IRP2	1.1174	0.000212535	0.000195774	0.000334043	0.00014548	0.000134007	0.000228652	0.000263412	0.000133787	0.000166196	1.9087e-06	1.71128e-06	2.95418e-06	0.724604	1.2791	1.77753	1.26041	0.526711	0.100513					P13804	P13804	ETFA	Electron transfer flavoprotein subunit alpha, mitochondrial, Alpha-ETF	11	0.606842	Yes		P35998	P35998	PSMC2	26S proteasome regulatory subunit 7, 26S proteasome AAA-ATPase subunit RPT1, Proteasome 26S subunit ATPase 2	27	2.04023e+09	1.49781e+09	1.60346e+09		P12270	P12270	TPR	Nucleoprotein TPR, Megator, NPC-associated intranuclear protein, Translocated promoter region protein	16	3.82217e+08
P62854	P62854	RPS26	40S ribosomal protein S26, Small ribosomal subunit protein eS26	2.46128	0.106579	0.10801	0.081694	0.0901997	0.0914107	0.0691393	0.0759332	0.100376	0.0848209	0.00118342	0.00116731	0.00089328	1.5585	1.16295	1.05314	1.2582	0.265806	0.0997481					Q9H9A6	Q9H9A6	LRRC40	Leucine-rich repeat-containing protein 40	11	-0.100852	Yes		Q99615	Q99615	DNAJC7	DnaJ homolog subfamily C member 7, Tetratricopeptide repeat protein 2, TPR repeat protein 2	27	1.38788e+09	1.0013e+09	1.13293e+09		Q9Y490	Q9Y490	TLN1	Talin-1	16	3.68753e+08
O75683	O75683	SURF6	Surfeit locus protein 6	2.55444	0.00744474	0.00899266	0.00647692	0.00636177	0.00768452	0.00553474	0.00559635	0.00832129	0.00659013	8.34664e-05	9.81314e-05	7.15088e-05	1.49144	1.17928	1.08509	1.25194	0.212698	0.0975828					Q9NUL7	Q9NUL7	DDX28	Probable ATP-dependent RNA helicase DDX28, 3.6.4.13, Mitochondrial DEAD box protein 28	11	-0.155967	Yes		O95573	O95573	ACSL3	Fatty acid CoA ligase Acsl3, Arachidonate--CoA ligase, 6.2.1.15, Long-chain acyl-CoA synthetase 3, LACS 3, Long-chain-fatty-acid--CoA ligase 3, 6.2.1.3, Medium-chain acyl-CoA ligase Acsl3, 6.2.1.2	26	1.50939e+09	1.44965e+09	1.48801e+09		P11021	P11021	HSPA5	Endoplasmic reticulum chaperone BiP, 3.6.4.10, 78 kDa glucose-regulated protein, GRP-78, Binding-immunoglobulin protein, BiP, Heat shock protein 70 family protein 5, HSP70 family protein 5, Heat shock protein family A member 5, Immunoglobulin heavy chain-binding protein	16	4.77875e+08
Q86UE4	Q86UE4	MTDH	Protein LYRIC, 3D3/LYRIC, Astrocyte elevated gene-1 protein, AEG-1, Lysine-rich CEACAM1 co-isolated protein, Metadherin, Metastasis adhesion protein	5.5765	0.0100412	0.013317	0.0111367	0.00983512	0.0130436	0.0109081	0.0130488	0.0118342	0.0104959	0.000129037	0.000166567	0.000140932	0.988879	1.4075	1.34274	1.24637	0.225336	0.0956481					P07900	P07900	HSP90AA1	Heat shock protein HSP 90-alpha, 3.6.4.10, Heat shock 86 kDa, HSP 86, HSP86, Lipopolysaccharide-associated protein 2, LAP-2, LPS-associated protein 2, Renal carcinoma antigen NY-REN-38	11	-0.339088	Yes		P46063	P46063	RECQL	ATP-dependent DNA helicase Q1, 3.6.4.12, DNA helicase, RecQ-like type 1, RecQ1, DNA-dependent ATPase Q1, RecQ protein-like 1	26	1.15347e+09	1.01167e+09	1.03778e+09		P00558	P00558	PGK1	Phosphoglycerate kinase 1, 2.7.2.3, Cell migration-inducing gene 10 protein, Primer recognition protein 2, PRP 2	16	1.00988e+09
Q16630	Q16630	CPSF6	Cleavage and polyadenylation specificity factor subunit 6, Cleavage and polyadenylation specificity factor 68 kDa subunit, CPSF 68 kDa subunit, Cleavage factor Im complex 68 kDa subunit, CFIm68, Pre-mRNA cleavage factor Im 68 kDa subunit, Protein HPBRII-4/7	3.08183	0.00714547	0.00729543	0.00732848	0.00639068	0.0065248	0.00655436	0.00855545	0.00495387	0.00810785	8.38458e-05	8.33217e-05	8.46824e-05	0.980028	1.68195	1.04445	1.23548	0.387999	0.0918346					Q6YN16	Q6YN16	HSDL2	Hydroxysteroid dehydrogenase-like protein 2, 1.-.-.-, Short chain dehydrogenase/reductase family 13C member 1	11	-0.440786	Yes		Q9NVP1	Q9NVP1	DDX18	ATP-dependent RNA helicase DDX18, 3.6.4.13, DEAD box protein 18, Myc-regulated DEAD box protein, MrDb	26	1.24775e+09	1.19889e+09	1.30507e+09		P29401	P29401	TKT	Transketolase, TK, 2.2.1.1	16	4.33317e+08
Q9BRJ2	Q9BRJ2	MRPL45	39S ribosomal protein L45, mitochondrial, L45mt, MRP-L45, Mitochondrial large ribosomal subunit protein mL45	2.17674	0.0131661	0.0117293	0.0104966	0.0107815	0.0096049	0.00859551	0.00963469	0.0100226	0.0110537	0.000141453	0.000122655	0.000111054	1.46816	1.22378	1.00467	1.2322	0.23186	0.0906829					Q9UKA9	Q9UKA9	PTBP2	Polypyrimidine tract-binding protein 2, Neural polypyrimidine tract-binding protein, Neurally-enriched homolog of PTB, PTB-like protein	11	-0.642607	Yes		O43865	O43865	AHCYL1	S-adenosylhomocysteine hydrolase-like protein 1, DC-expressed AHCY-like molecule, IP(3)Rs binding protein released with IP(3), IRBIT, Putative adenosylhomocysteinase 2, S-adenosyl-L-homocysteine hydrolase 2, AdoHcyase 2	26	2.76229e+10	6.02653e+10	4.2463e+10		P60709	P60709	ACTB	Actin, cytoplasmic 1, 3.6.4.-, Beta-actin	16	5.54464e+09
Q13601	Q13601	KRR1	KRR1 small subunit processome component homolog, HIV-1 Rev-binding protein 2, KRR-R motif-containing protein 1, Rev-interacting protein 1, Rip-1	2.06839	0.00787728	0.00799875	0.00679765	0.00636072	0.0064588	0.00548895	0.0066979	0.00629816	0.00632172	8.34527e-05	8.24789e-05	7.09172e-05	1.24595	1.30957	1.1218	1.22578	0.0954976	0.0884109					Q8IZ69	Q8IZ69	TRMT2A	tRNA (uracil-5-)-methyltransferase homolog A, 2.1.1.35, mRNA (uracil-5-)-methyltransferase TRMT2A, 2.1.1.-	11	-2.6207	Yes		P06493	P06493	CDK1	Cyclin-dependent kinase 1, CDK1, 2.7.11.22, 2.7.11.23, Cell division control protein 2 homolog, Cell division protein kinase 1, p34 protein kinase	26	4.59627e+09	3.68776e+09	3.88546e+09		Q9BWF3	Q9BWF3	RBM4	RNA-binding protein 4, Lark homolog, hLark, RNA-binding motif protein 4, RNA-binding motif protein 4a	15	5.03949e+09
Q9Y5J1	Q9Y5J1	UTP18	U3 small nucleolar RNA-associated protein 18 homolog, WD repeat-containing protein 50	4.47653	0.0122873	0.0135702	0.0139217	0.0117591	0.0129869	0.0133232	0.0139338	0.0139463	0.0130311	0.000154279	0.000165842	0.000172136	1.10723	1.18915	1.32096	1.20578	0.107834	0.0812675					Q08945	Q08945	SSRP1	FACT complex subunit SSRP1, Chromatin-specific transcription elongation factor 80 kDa subunit, Facilitates chromatin transcription complex 80 kDa subunit, FACT 80 kDa subunit, FACTp80, Facilitates chromatin transcription complex subunit SSRP1, Recombination signal sequence recognition protein 1, Structure-specific recognition protein 1, hSSRP1, T160	11	-6.24921	No		Q9Y285	Q9Y285	FARSA	Phenylalanine--tRNA ligase alpha subunit, 6.1.1.20, CML33, Phenylalanyl-tRNA synthetase alpha subunit, PheRS	26	1.04222e+09	7.26078e+08	1.07187e+09		Q96E39	Q96E39	RBMXL1	RNA binding motif protein, X-linked-like-1, Heterogeneous nuclear ribonucleoprotein G-like 1	15	1.24127e+09
Q9NUL7	Q9NUL7	DDX28	Probable ATP-dependent RNA helicase DDX28, 3.6.4.13, Mitochondrial DEAD box protein 28	-0.155967	0.00469801	0.00514065	0.00494662	0.00222216	0.00243152	0.00233975	0.00227723	0.00282884	0.00244794	2.91547e-05	3.10506e-05	3.02295e-05	1.28027	1.09764	1.2349	1.20427	0.095086	0.0807237					Q12986	Q12986	NFX1	Transcriptional repressor NF-X1, 2.3.2.-, Nuclear transcription factor, X box-binding protein 1	11	-10	No		Q4G0J3	Q4G0J3	LARP7	La-related protein 7, La ribonucleoprotein domain family member 7, hLARP7, P-TEFb-interaction protein for 7SK stability, PIP7S	26	2.66281e+08	4.1013e+08	2.8638e+08		Q8IWZ3	Q8IWZ3	ANKHD1	Ankyrin repeat and KH domain-containing protein 1, HIV-1 Vpr-binding ankyrin repeat protein, Multiple ankyrin repeats single KH domain, hMASK	15	3.41922e+08
P23396	P23396	RPS3	40S ribosomal protein S3, 4.2.99.18, Small ribosomal subunit protein uS3	4.15361	0.386163	0.348339	0.33826	0.36562	0.329808	0.320265	0.356364	0.412475	0.345457	0.00479693	0.00421165	0.00413782	1.34608	1.02107	1.19778	1.18831	0.16271	0.0749294					Q07666	Q07666	KHDRBS1	KH domain-containing, RNA-binding, signal transduction-associated protein 1, GAP-associated tyrosine phosphoprotein p62, Src-associated in mitosis 68 kDa protein, Sam68, p21 Ras GTPase-activating protein-associated p62, p68	10	5.9831	Yes		P62750	P62750	RPL23A	60S ribosomal protein L23a, Large ribosomal subunit protein uL23	26	6.97905e+09	7.60932e+09	7.35916e+09		P62633	P62633	CNBP	CCHC-type zinc finger nucleic acid binding protein, Cellular nucleic acid-binding protein, CNBP, Zinc finger protein 9	15	2.46054e+09
Q12874	Q12874	SF3A3	Splicing factor 3A subunit 3, SF3a60, Spliceosome-associated protein 61, SAP 61	4.19609	0.0168599	0.0172164	0.0156813	0.0159877	0.0163257	0.01487	0.0198091	0.0135228	0.0202219	0.000209759	0.000208479	0.000192121	1.0589	1.54168	0.950062	1.18355	0.314889	0.073186					Q76FK4	Q76FK4	NOL8	Nucleolar protein 8, Nucleolar protein Nop132	10	5.46896	Yes		Q9Y3F4	Q9Y3F4	STRAP	Serine-threonine kinase receptor-associated protein, MAP activator with WD repeats, UNR-interacting protein, WD-40 repeat protein PT-WD	26	2.72239e+09	1.96028e+09	2.15895e+09		Q8N3C0	Q8N3C0	ASCC3	Activating signal cointegrator 1 complex subunit 3, 3.6.4.12, ASC-1 complex subunit p200, ASC1p200, Helicase, ATP binding 1, Trip4 complex subunit p200	15	4.29258e+08
Q9Y6K0	Q9Y6K0	CEPT1	Choline/ethanolaminephosphotransferase 1, hCEPT1, 2.7.8.1, 2.7.8.2, 1-alkenyl-2-acylglycerol choline phosphotransferase, 2.7.8.22	3.97103	0.000964775	0.000887339	0.00105835	0.000906942	0.000834148	0.000994907	0.000928888	0.00108707	0.00103705	1.18991e-05	1.06521e-05	1.28542e-05	1.281	0.979892	1.23949	1.16679	0.163188	0.0669945					P41214	P41214	EIF2D	Eukaryotic translation initiation factor 2D, eIF2d, Hepatocellular carcinoma-associated antigen 56, Ligatin	10	5.32237	Yes		Q9GZR7	Q9GZR7	DDX24	ATP-dependent RNA helicase DDX24, 3.6.4.13, DEAD box protein 24	26	6.26515e+08	6.09208e+08	6.43274e+08		Q15029	Q15029	EFTUD2	116 kDa U5 small nuclear ribonucleoprotein component, Elongation factor Tu GTP-binding domain-containing protein 2, SNU114 homolog, hSNU114, U5 snRNP-specific protein, 116 kDa, U5-116 kDa	15	6.17818e+09
Q7Z6E9	Q7Z6E9	RBBP6	E3 ubiquitin-protein ligase RBBP6, 2.3.2.27, Proliferation potential-related protein, Protein P2P-R, RING-type E3 ubiquitin transferase RBBP6, Retinoblastoma-binding Q protein 1, RBQ-1, Retinoblastoma-binding protein 6, p53-associated cellular protein of testis	3.14256	0.00272802	0.00335523	0.0029922	0.00245052	0.00301393	0.00268783	0.00332563	0.00318113	0.00270835	3.21509e-05	3.84879e-05	3.47268e-05	0.966761	1.20988	1.28221	1.15295	0.165253	0.0618115					P62995	P62995	TRA2B	Transformer-2 protein homolog beta, TRA-2 beta, TRA2-beta, hTRA2-beta, Splicing factor, arginine/serine-rich 10, Transformer-2 protein homolog B	10	5.02222	Yes		Q15046	Q15046	KARS1	Lysine--tRNA ligase, 2.7.7.-, 6.1.1.6, Lysyl-tRNA synthetase, LysRS	26	1.68321e+09	1.20436e+09	1.34951e+09		P82933	P82933	MRPS9	28S ribosomal protein S9, mitochondrial, MRP-S9, S9mt, Mitochondrial small ribosomal subunit protein uS9m	15	4.82255e+08
Q13427	Q13427	PPIG	Peptidyl-prolyl cis-trans isomerase G, PPIase G, Peptidyl-prolyl isomerase G, 5.2.1.8, CASP10, Clk-associating RS-cyclophilin, CARS-Cyp, CARS-cyclophilin, SR-cyclophilin, SR-cyp, SRcyp, Cyclophilin G, Rotamase G	1.13051	0.00218786	0.00213518	0.00188409	0.00150187	0.00146571	0.00129334	0.00160399	0.0016023	0.00161244	1.97045e-05	1.87171e-05	1.671e-05	1.22847	1.16814	1.03632	1.14431	0.0982667	0.0585433					Q01844	Q01844	EWSR1	RNA-binding protein EWS, EWS oncogene, Ewing sarcoma breakpoint region 1 protein	10	4.85169	Yes		O60306	O60306	AQR	RNA helicase aquarius, 3.6.4.13, Intron-binding protein of 160 kDa, IBP160	26	4.73976e+08	4.24484e+08	4.84565e+08		Q9Y2R4	Q9Y2R4	DDX52	Probable ATP-dependent RNA helicase DDX52, 3.6.4.13, ATP-dependent RNA helicase ROK1-like, DEAD box protein 52	15	3.85843e+08
Q9Y2R9	Q9Y2R9	MRPS7	28S ribosomal protein S7, mitochondrial, MRP-S7, S7mt, Mitochondrial small ribosomal subunit protein uS7m, bMRP-27a, bMRP27a	2.09299	0.00397367	0.00453658	0.004994	0.00321912	0.00367514	0.00404571	0.00527421	0.00381401	0.00383371	4.22349e-05	4.69316e-05	5.22705e-05	0.800782	1.23051	1.36345	1.13158	0.294088	0.0536846					P98179	P98179	RBM3	RNA-binding protein 3, RNA-binding motif protein 3, RNPL	10	4.5557	Yes		O14979	O14979	HNRNPDL	Heterogeneous nuclear ribonucleoprotein D-like, hnRNP D-like, hnRNP DL, AU-rich element RNA-binding factor, JKT41-binding protein, Protein laAUF1	26	1.84687e+09	1.61187e+09	1.50852e+09		Q9BQ39	Q9BQ39	DDX50	ATP-dependent RNA helicase DDX50, 3.6.4.13, DEAD box protein 50, Gu-beta, Nucleolar protein Gu2	15	2.1411e+08
Q9Y6K5	Q9Y6K5	OAS3	2'-5'-oligoadenylate synthase 3, (2-5')oligo(A) synthase 3, 2-5A synthase 3, 2.7.7.84, p100 OAS, p100OAS	2.29555	0.00125296	0.00107252	0.00128479	0.00104093	0.000891026	0.00106737	0.00135185	0.00109694	0.00103375	1.3657e-05	1.13784e-05	1.37905e-05	1.01024	1.03728	1.33402	1.12718	0.179635	0.0519933					Q96E39	Q96E39	RBMXL1	RNA binding motif protein, X-linked-like-1, Heterogeneous nuclear ribonucleoprotein G-like 1	10	4.52083	Yes		P46778	P46778	RPL21	60S ribosomal protein L21, Large ribosomal subunit protein eL21	26	5.32363e+09	6.86054e+09	6.49602e+09		Q9H0H5	Q9H0H5	RACGAP1	Rac GTPase-activating protein 1, Male germ cell RacGap, MgcRacGAP, Protein CYK4 homolog, CYK4, HsCYK-4	15	2.92815e+08
P06744	P06744	GPI	Glucose-6-phosphate isomerase, GPI, 5.3.1.9, Autocrine motility factor, AMF, Neuroleukin, NLK, Phosphoglucose isomerase, PGI, Phosphohexose isomerase, PHI, Sperm antigen 36, SA-36	0.630068	0.252601	0.186827	0.181426	0.15345	0.113494	0.110213	0.162862	0.112796	0.165971	0.00201326	0.00144932	0.00142395	1.23617	1.2849	0.857951	1.12634	0.233707	0.0516702					Q9Y5J1	Q9Y5J1	UTP18	U3 small nucleolar RNA-associated protein 18 homolog, WD repeat-containing protein 50	10	4.47653	Yes		Q86XP3	Q86XP3	DDX42	ATP-dependent RNA helicase DDX42, 3.6.4.13, DEAD box protein 42, RNA helicase-like protein, RHELP, RNA helicase-related protein, RNAHP, SF3b DEAD box protein, Splicing factor 3B-associated 125 kDa protein, SF3b125	26	8.78343e+08	7.18609e+08	6.83353e+08		P30419	P30419	NMT1	Glycylpeptide N-tetradecanoyltransferase 1, 2.3.1.97, Myristoyl-CoA:protein N-myristoyltransferase 1, HsNMT1, NMT 1, Type I N-myristoyltransferase, Peptide N-myristoyltransferase 1, Protein-lysine myristoyltransferase NMT1, 2.3.1.-	15	4.20798e+08
Q8IZ69	Q8IZ69	TRMT2A	tRNA (uracil-5-)-methyltransferase homolog A, 2.1.1.35, mRNA (uracil-5-)-methyltransferase TRMT2A, 2.1.1.-	-2.6207	0.0123916	0.00967321	0.0097274	0.00173298	0.0013528	0.00136038	0.00215616	0.00136577	0.00171095	2.27367e-05	1.72753e-05	1.75761e-05	1.0545	1.26488	1.02728	1.11555	0.130035	0.0474891					Q99590	Q99590	SCAF11	Protein SCAF11, CTD-associated SR protein 11, Renal carcinoma antigen NY-REN-40, SC35-interacting protein 1, SR-related and CTD-associated factor 11, SRSF2-interacting protein, Serine/arginine-rich splicing factor 2-interacting protein, Splicing factor, arginine/serine-rich 2-interacting protein, Splicing regulatory protein 129, SRrp129	10	4.28984	Yes		P48634	P48634	PRRC2A	Protein PRRC2A, HLA-B-associated transcript 2, Large proline-rich protein BAT2, Proline-rich and coiled-coil-containing protein 2A, Protein G2	26	5.94904e+08	4.60816e+08	5.6217e+08		Q02241	Q02241	KIF23	Kinesin-like protein KIF23, Kinesin-like protein 5, Mitotic kinesin-like protein 1	15	2.81912e+08
Q9NXH9	Q9NXH9	TRMT1	tRNA (guanine(26)-N(2))-dimethyltransferase, 2.1.1.216, tRNA 2,2-dimethylguanosine-26 methyltransferase, tRNA(guanine-26,N(2)-N(2)) methyltransferase, tRNA(m(2,2)G26)dimethyltransferase	3.28246	0.00814958	0.0071756	0.00683401	0.00739008	0.00650687	0.00619711	0.00807392	0.00712975	0.00835528	9.69578e-05	8.30927e-05	8.00667e-05	1.20088	1.16544	0.958277	1.1082	0.131038	0.0446167					P19525	P19525	EIF2AK2	Interferon-induced, double-stranded RNA-activated protein kinase, 2.7.11.1, Eukaryotic translation initiation factor 2-alpha kinase 2, eIF-2A protein kinase 2, Interferon-inducible RNA-dependent protein kinase, P1/eIF-2A protein kinase, Protein kinase RNA-activated, PKR, Protein kinase R, Tyrosine-protein kinase EIF2AK2, 2.7.10.2, p68 kinase	10	4.23563	Yes		O60264	O60264	SMARCA5	SWI/SNF-related matrix-associated actin-dependent regulator of chromatin subfamily A member 5, SWI/SNF-related matrix-associated actin-dependent regulator of chromatin A5, 3.6.4.-, Sucrose nonfermenting protein 2 homolog, hSNF2H	26	1.74391e+09	1.53767e+09	1.53861e+09		Q9Y2Z4	Q9Y2Z4	YARS2	Tyrosine--tRNA ligase, mitochondrial, 6.1.1.1, Tyrosyl-tRNA synthetase, TyrRS	15	3.71138e+08
Q9UHB9	Q9UHB9	SRP68	Signal recognition particle subunit SRP68, SRP68, Signal recognition particle 68 kDa protein	3.11651	0.0125184	0.0114872	0.011201	0.0112242	0.0102997	0.010043	0.0138331	0.0119266	0.0114392	0.000147262	0.000131527	0.000129756	1.06456	1.1028	1.13431	1.10055	0.0349291	0.0416112					P52756	P52756	RBM5	RNA-binding protein 5, Protein G15, Putative tumor suppressor LUCA15, RNA-binding motif protein 5, Renal carcinoma antigen NY-REN-9	10	4.17821	Yes		P37837	P37837	TALDO1	Transaldolase, 2.2.1.2	26	2.89285e+09	2.04398e+09	2.80207e+09		Q9Y295	Q9Y295	DRG1	Developmentally-regulated GTP-binding protein 1, DRG-1, Neural precursor cell expressed developmentally down-regulated protein 3, NEDD-3, Translation factor GTPase DRG1, TRAFAC GTPase DRG1, 3.6.5.-	15	2.65222e+08
Q8WWY3	Q8WWY3	PRPF31	U4/U6 small nuclear ribonucleoprotein Prp31, Pre-mRNA-processing factor 31, Serologically defined breast cancer antigen NY-BR-99, U4/U6 snRNP 61 kDa protein, Protein 61K, hPrp31	3.61597	0.00572603	0.00616839	0.00471741	0.00529423	0.00570322	0.00436166	0.00610601	0.00651286	0.00542434	6.94602e-05	7.28302e-05	5.63527e-05	1.13757	1.11825	1.03889	1.09824	0.0522993	0.0406959					Q9GZT3	Q9GZT3	SLIRP	SRA stem-loop-interacting RNA-binding protein, mitochondrial	10	4.12223	Yes		Q29RF7	Q29RF7	PDS5A	Sister chromatid cohesion protein PDS5 homolog A, Cell proliferation-inducing gene 54 protein, Sister chromatid cohesion protein 112, SCC-112	26	7.72716e+08	6.7617e+08	6.73588e+08		P62263	P62263	RPS14	40S ribosomal protein S14, Small ribosomal subunit protein uS11	15	4.45776e+09
P82933	P82933	MRPS9	28S ribosomal protein S9, mitochondrial, MRP-S9, S9mt, Mitochondrial small ribosomal subunit protein uS9m	1.29535	0.00825439	0.00785627	0.00759925	0.00586484	0.00558197	0.00539935	0.00725763	0.00620214	0.00645918	7.69466e-05	7.12817e-05	6.97596e-05	1.06022	1.14931	1.08001	1.09651	0.0467829	0.040013					O43251	O43251	RBFOX2	RNA binding protein fox-1 homolog 2, Fox-1 homolog B, Hexaribonucleotide-binding protein 2, RNA-binding motif protein 9, RNA-binding protein 9, Repressor of tamoxifen transcriptional activity	10	3.98059	Yes		O75874	O75874	IDH1	Isocitrate dehydrogenase [NADP] cytoplasmic, IDH, IDH1, 1.1.1.42, Cytosolic NADP-isocitrate dehydrogenase, IDPc, NADP(+)-specific ICDH, Oxalosuccinate decarboxylase	26	1.99288e+09	1.55347e+09	1.76519e+09		Q9HC35	Q9HC35	EML4	Echinoderm microtubule-associated protein-like 4, EMAP-4, Restrictedly overexpressed proliferation-associated protein, Ropp 120	15	2.75962e+08
Q9BY77	Q9BY77	POLDIP3	Polymerase delta-interacting protein 3, 46 kDa DNA polymerase delta interaction protein, p46, S6K1 Aly/REF-like target, SKAR	4.1769	0.0115396	0.0129377	0.011925	0.010935	0.0122598	0.0113003	0.0126611	0.0134816	0.0146925	0.000143468	0.000156558	0.000145999	1.13313	1.16128	0.993703	1.09604	0.0897344	0.0398252					O95478	O95478	NSA2	Ribosome biogenesis protein NSA2 homolog, Hairy cell leukemia protein 1, TGF-beta-inducible nuclear protein 1	10	3.87008	Yes		P09960	P09960	LTA4H	Leukotriene A-4 hydrolase, LTA-4 hydrolase, 3.3.2.6, Leukotriene A(4) hydrolase, Tripeptide aminopeptidase LTA4H, 3.4.11.4	26	1.78401e+09	1.36162e+09	1.3885e+09		A5YKK6	A5YKK6	CNOT1	CCR4-NOT transcription complex subunit 1, CCR4-associated factor 1, Negative regulator of transcription subunit 1 homolog, NOT1H, hNOT1	15	1.33794e+08
Q14674	Q14674	ESPL1	Separin, 3.4.22.49, Caspase-like protein ESPL1, Extra spindle poles-like 1 protein, Separase	1.64527	0.000300229	0.000302889	0.000230996	0.0002275	0.000229516	0.000175039	0.00027006	0.000225823	0.000259327	2.98481e-06	2.93092e-06	2.2615e-06	1.10524	1.29788	0.872065	1.09173	0.213231	0.0381151					Q8NCA5	Q8NCA5	FAM98A	Protein FAM98A	10	3.76823	Yes		P39748	P39748	FEN1	Flap endonuclease 1, FEN-1, 3.1.-.-, DNase IV, Flap structure-specific endonuclease 1, Maturation factor 1, MF1, hFEN-1	26	2.14085e+09	1.74666e+09	1.929e+09		P08865	P08865	RPSA	40S ribosomal protein SA, 37 kDa laminin receptor precursor, 37LRP, 37/67 kDa laminin receptor, LRP/LR, 67 kDa laminin receptor, 67LR, Colon carcinoma laminin-binding protein, Laminin receptor 1, LamR, Laminin-binding protein precursor p40, LBP/p40, Multidrug resistance-associated protein MGr1-Ag, NEM/1CHD4, Small ribosomal subunit protein uS2	15	9.77322e+08
P48651	P48651	PTDSS1	Phosphatidylserine synthase 1, PSS-1, PtdSer synthase 1, 2.7.8.29, Serine-exchange enzyme I	4.15859	0.0017269	0.00124266	0.00160354	0.00163534	0.00117677	0.00151851	0.00162498	0.00185848	0.00175022	2.14556e-05	1.50273e-05	1.96191e-05	1.32036	0.808579	1.12095	1.0833	0.257961	0.0347478					Q7L014	Q7L014	DDX46	Probable ATP-dependent RNA helicase DDX46, 3.6.4.13, DEAD box protein 46, PRP5 homolog	10	3.59837	Yes		Q9UQ35	Q9UQ35	SRRM2	Serine/arginine repetitive matrix protein 2, 300 kDa nuclear matrix antigen, Serine/arginine-rich splicing factor-related nuclear matrix protein of 300 kDa, SR-related nuclear matrix protein of 300 kDa, Ser/Arg-related nuclear matrix protein of 300 kDa, Splicing coactivator subunit SRm300, Tax-responsive enhancer element-binding protein 803, TaxREB803	26	1.1717e+09	6.98332e+08	1.04285e+09		Q9Y3A5	Q9Y3A5	SBDS	Ribosome maturation protein SBDS, Shwachman-Bodian-Diamond syndrome protein	15	3.97395e+08
Q969Z0	Q969Z0	TBRG4	FAST kinase domain-containing protein 4, Cell cycle progression restoration protein 2, Cell cycle progression protein 2, Protein TBRG4, Transforming growth factor beta regulator 4	1.77397	0.0106941	0.00907682	0.00893265	0.00827461	0.00702321	0.00691166	0.00944334	0.00759781	0.00975264	0.000108563	8.96864e-05	8.92987e-05	1.14962	1.18042	0.915636	1.08189	0.144805	0.0341849					Q9ULX3	Q9ULX3	NOB1	RNA-binding protein NOB1, 3.1.-.-, Phosphorylation regulatory protein HP-10, Protein ART-4	10	3.26991	Yes		Q16891	Q16891	IMMT	MICOS complex subunit MIC60, Cell proliferation-inducing gene 4/52 protein, Mitochondrial inner membrane protein, Mitofilin, p87/89	26	1.19446e+09	6.09587e+08	9.32941e+08		Q9Y3I0	Q9Y3I0	RTCB	RNA-splicing ligase RtcB homolog, 6.5.1.8, 3'-phosphate/5'-hydroxy nucleic acid ligase	15	3.93354e+08
O75369	O75369	FLNB	Filamin-B, FLN-B, ABP-278, ABP-280 homolog, Actin-binding-like protein, Beta-filamin, Filamin homolog 1, Fh1, Filamin-3, Thyroid autoantigen, Truncated actin-binding protein, Truncated ABP	0.87405	1.3162	1.19898	1.74777	0.851572	0.775731	1.13079	0.653118	1.41614	1.81569	0.0111726	0.00990608	0.0146098	1.71066	0.699512	0.804642	1.0716	0.555929	0.0300346					P26373	P26373	RPL13	60S ribosomal protein L13, Breast basic conserved protein 1, Large ribosomal subunit protein eL13	10	3.14043	Yes		P40763	P40763	STAT3	Signal transducer and activator of transcription 3, Acute-phase response factor	25	1.8264e+09	1.59805e+09	1.87397e+09		P05556	P05556	ITGB1	Integrin beta-1, Fibronectin receptor subunit beta, Glycoprotein IIa, GPIIA, VLA-4 subunit beta, CD29	15	3.55596e+08
Q9Y4W6	Q9Y4W6	AFG3L2	AFG3-like protein 2, 3.4.24.-, Paraplegin-like protein	1.12835	0.00476854	0.00875279	0.0133349	0.00327186	0.0060056	0.00914954	0.00970294	0.00655829	0.00746343	4.29268e-05	7.66915e-05	0.000118212	0.44241	1.16938	1.58388	1.06522	0.57782	0.0274413					P26196	P26196	DDX6	Probable ATP-dependent RNA helicase DDX6, 3.6.4.13, ATP-dependent RNA helicase p54, DEAD box protein 6, Oncogene RCK	10	3.08152	Yes		P05556	P05556	ITGB1	Integrin beta-1, Fibronectin receptor subunit beta, Glycoprotein IIa, GPIIA, VLA-4 subunit beta, CD29	25	2.03437e+09	1.95553e+09	1.99356e+09		P0DMV8	P0DMV8	HSPA1A	Heat shock 70 kDa protein 1A, Heat shock 70 kDa protein 1, HSP70-1, HSP70.1	15	4.31137e+08
Q14683	Q14683	SMC1A	Structural maintenance of chromosomes protein 1A, SMC protein 1A, SMC-1-alpha, SMC-1A, Sb1.8	1.25422	0.0469232	0.0488161	0.0497326	0.0330627	0.0343964	0.0350422	0.0479652	0.043311	0.0380743	0.000433782	0.000439243	0.000452745	0.904369	1.01416	1.18911	1.03588	0.143607	0.015309					Q9Y295	Q9Y295	DRG1	Developmentally-regulated GTP-binding protein 1, DRG-1, Neural precursor cell expressed developmentally down-regulated protein 3, NEDD-3, Translation factor GTPase DRG1, TRAFAC GTPase DRG1, 3.6.5.-	10	2.79761	Yes		P17655	P17655	CAPN2	Calpain-2 catalytic subunit, 3.4.22.53, Calcium-activated neutral proteinase 2, CANP 2, Calpain M-type, Calpain large polypeptide L2, Calpain-2 large subunit, Millimolar-calpain, M-calpain	25	1.03297e+09	8.52802e+08	8.38475e+08		P14923	P14923	JUP	Junction plakoglobin, Catenin gamma, Desmoplakin III, Desmoplakin-3	15	8.23772e+08
P78345	P78345	RPP38	Ribonuclease P protein subunit p38, RNaseP protein p38	4.05846	0.000693233	0.000938249	0.000705784	0.000653983	0.000885126	0.000665822	0.00112187	0.00131958	0.000588345	8.58025e-06	1.13031e-05	8.60242e-06	0.764817	0.856562	1.46214	1.02784	0.378901	0.0119251					O95900	O95900	TRUB2	Pseudouridylate synthase TRUB2, mitochondrial, 5.4.99.-, TruB pseudouridine synthase homolog 2, tRNA pseudouridine 55 synthase TRUB2, Psi55 synthase TRUB2, 5.4.99.25	10	2.78377	Yes		P05388	P05388	RPLP0	60S acidic ribosomal protein P0, 60S ribosomal protein L10E, Large ribosomal subunit protein uL10	25	7.45186e+09	7.55617e+09	7.44346e+09		P98160	P98160	HSPG2	Basement membrane-specific heparan sulfate proteoglycan core protein, HSPG, Perlecan, PLC	15	1.95851e+08
Q9BYG3	Q9BYG3	NIFK	MKI67 FHA domain-interacting nucleolar phosphoprotein, Nucleolar phosphoprotein Nopp34, Nucleolar protein interacting with the FHA domain of pKI-67, hNIFK	2.96265	0.0123583	0.0123721	0.0110625	0.0109532	0.0109654	0.00980474	0.0123421	0.0132443	0.014829	0.000143706	0.000140029	0.000126677	1.16436	1.05728	0.854256	1.0253	0.157504	0.0108494					Q9P015	Q9P015	MRPL15	39S ribosomal protein L15, mitochondrial, L15mt, MRP-L15, Mitochondrial large ribosomal subunit protein uL15m	10	2.75991	Yes		O60832	O60832	DKC1	H/ACA ribonucleoprotein complex subunit DKC1, 5.4.99.-, CBF5 homolog, Dyskerin, Nopp140-associated protein of 57 kDa, Nucleolar protein NAP57, Nucleolar protein family A member 4, snoRNP protein DKC1	25	1.66863e+09	1.71154e+09	1.74519e+09		O14776	O14776	TCERG1	Transcription elongation regulator 1, TATA box-binding protein-associated factor 2S, Transcription factor CA150	15	2.77677e+09
O14647	O14647	CHD2	Chromodomain-helicase-DNA-binding protein 2, CHD-2, 3.6.4.12, ATP-dependent helicase CHD2	1.83178	0.000100761	0.000107092	6.43299e-05	7.86634e-05	8.36059e-05	5.02217e-05	9.86713e-05	8.65746e-05	8.2567e-05	1.03206e-06	1.06765e-06	6.48865e-07	1.04596	1.23321	0.785864	1.02168	0.22466	0.00931446					Q9BY44	Q9BY44	EIF2A	Eukaryotic translation initiation factor 2A, eIF-2A, 65 kDa eukaryotic translation initiation factor 2A	10	2.53661	Yes		P39019	P39019	RPS19	40S ribosomal protein S19, Small ribosomal subunit protein eS19	25	1.21744e+10	1.30096e+10	1.33791e+10		P29558	P29558	RBMS1	RNA-binding motif, single-stranded-interacting protein 1, Single-stranded DNA-binding protein MSSP-1, Suppressor of CDC2 with RNA-binding motif 2	14	1.76843e+09
Q9Y2R4	Q9Y2R4	DDX52	Probable ATP-dependent RNA helicase DDX52, 3.6.4.13, ATP-dependent RNA helicase ROK1-like, DEAD box protein 52	1.62598	0.00660418	0.00626173	0.00549075	0.00498809	0.00472944	0.00414712	0.00556141	0.00651186	0.00579042	6.54437e-05	6.03949e-05	5.35808e-05	1.17675	0.92746	0.925336	1.00985	0.144543	0.0042558					P09001	P09001	MRPL3	39S ribosomal protein L3, mitochondrial, L3mt, MRP-L3, Mitochondrial large ribosomal subunit protein uL3m	10	2.45744	Yes		Q9NWH9	Q9NWH9	SLTM	SAFB-like transcription modulator, Modulator of estrogen-induced transcription	25	5.83789e+08	5.69789e+08	4.74163e+08		Q9BYD1	Q9BYD1	MRPL13	39S ribosomal protein L13, mitochondrial, L13mt, MRP-L13, Mitochondrial large ribosomal subunit protein uL13m	14	2.91531e+09
Q9NUQ8	Q9NUQ8	ABCF3	ATP-binding cassette sub-family F member 3	2.55399	0.00410998	0.00470234	0.00566288	0.00351195	0.00401812	0.0048389	0.00597595	0.00494916	0.0052331	4.60768e-05	5.13114e-05	6.25186e-05	0.771037	1.03677	1.19468	1.00083	0.214094	0.000359308					P38919	P38919	EIF4A3	Eukaryotic initiation factor 4A-III, eIF-4A-III, eIF4A-III, 3.6.4.13, ATP-dependent RNA helicase DDX48, ATP-dependent RNA helicase eIF4A-3, DEAD box protein 48, Eukaryotic initiation factor 4A-like NUK-34, Eukaryotic translation initiation factor 4A isoform 3, Nuclear matrix protein 265, NMP 265, hNMP 265	10	2.44665	Yes		Q96T88	Q96T88	UHRF1	E3 ubiquitin-protein ligase UHRF1, 2.3.2.27, Inverted CCAAT box-binding protein of 90 kDa, Nuclear protein 95, Nuclear zinc finger protein Np95, HuNp95, hNp95, RING finger protein 106, RING-type E3 ubiquitin transferase UHRF1, Transcription factor ICBP90, Ubiquitin-like PHD and RING finger domain-containing protein 1, hUHRF1, Ubiquitin-like-containing PHD and RING finger domains protein 1	25	6.12822e+08	4.88662e+08	6.42239e+08		Q5T653	Q5T653	MRPL2	39S ribosomal protein L2, mitochondrial, L2mt, MRP-L2, Mitochondrial large ribosomal subunit protein uL2m	14	1.00491e+09
P30876	P30876	POLR2B	DNA-directed RNA polymerase II subunit RPB2, 2.7.7.6, DNA-directed RNA polymerase II 140 kDa polypeptide, DNA-directed RNA polymerase II subunit B, RNA polymerase II subunit 2, RNA polymerase II subunit B2	1.78008	0.0152599	0.0140128	0.014311	0.0118187	0.0108528	0.0110838	0.0152275	0.0156087	0.0137425	0.000155062	0.00013859	0.000143202	1.0183	0.887906	1.04204	0.982749	0.0829896	-0.00755732					P84103	P84103	SRSF3	Serine/arginine-rich splicing factor 3, Pre-mRNA-splicing factor SRP20, Splicing factor, arginine/serine-rich 3	10	2.30029	Yes		P25786	P25786	PSMA1	Proteasome subunit alpha type-1, 30 kDa prosomal protein, PROS-30, Macropain subunit C2, Multicatalytic endopeptidase complex subunit C2, Proteasome component C2, Proteasome nu chain	25	5.45294e+09	4.98358e+09	5.05751e+09		Q9ULX6	Q9ULX6	AKAP8L	A-kinase anchor protein 8-like, AKAP8-like protein, Helicase A-binding protein 95, HAP95, Homologous to AKAP95 protein, HA95, Neighbor of A-kinase-anchoring protein 95, Neighbor of AKAP95	14	4.42674e+08
Q8N163	Q8N163	CCAR2	Cell cycle and apoptosis regulator protein 2, Cell division cycle and apoptosis regulator protein 2, DBIRD complex subunit KIAA1967, Deleted in breast cancer gene 1 protein, DBC-1, DBC.1, NET35, p30 DBC	3.59652	0.0104005	0.0116531	0.0109165	0.00960638	0.0107633	0.010083	0.0147329	0.0117261	0.0145552	0.000126036	0.000137447	0.000130272	0.855473	1.17214	0.895022	0.974213	0.17255	-0.0113463					P30101	P30101	PDIA3	Protein disulfide-isomerase A3, 5.3.4.1, 58 kDa glucose-regulated protein, 58 kDa microsomal protein, p58, Disulfide isomerase ER-60, Endoplasmic reticulum resident protein 57, ER protein 57, ERp57, Endoplasmic reticulum resident protein 60, ER protein 60, ERp60	10	2.05113	Yes		P60709	P60709	ACTB	Actin, cytoplasmic 1, 3.6.4.-, Beta-actin	25	2.944e+11	2.35388e+11	3.10632e+11		Q86TG7	Q86TG7	PEG10	Retrotransposon-derived protein PEG10, Embryonal carcinoma differentiation-regulated protein, Mammalian retrotransposon-derived protein 2, Myelin expression factor 3-like protein 1, MEF3-like protein 1, Paternally expressed gene 10 protein, Retrotransposon gag domain-containing protein 3, Retrotransposon-derived gag-like polyprotein, Ty3/Gypsy-like protein	14	3.41916e+08
O00267	O00267	SUPT5H	Transcription elongation factor SPT5, hSPT5, DRB sensitivity-inducing factor 160 kDa subunit, DSIF p160, DRB sensitivity-inducing factor large subunit, DSIF large subunit, Tat-cotransactivator 1 protein, Tat-CT1 protein	2.1149	0.0144561	0.0113893	0.0125559	0.0117447	0.00925312	0.0102009	0.0139339	0.0144862	0.0131948	0.000154091	0.000118162	0.000131796	1.10587	0.815689	0.998842	0.973467	0.146745	-0.011679					O75616	O75616	ERAL1	GTPase Era, mitochondrial, H-ERA, hERA, Conserved ERA-like GTPase, CEGA, ERA-W, ERA-like protein 1	10	2.03271	Yes		Q9BUQ8	Q9BUQ8	DDX23	Probable ATP-dependent RNA helicase DDX23, 3.6.4.13, 100 kDa U5 snRNP-specific protein, DEAD box protein 23, PRP28 homolog, U5-100kD	25	1.03795e+09	1.04394e+09	9.35408e+08		Q99590	Q99590	SCAF11	Protein SCAF11, CTD-associated SR protein 11, Renal carcinoma antigen NY-REN-40, SC35-interacting protein 1, SR-related and CTD-associated factor 11, SRSF2-interacting protein, Serine/arginine-rich splicing factor 2-interacting protein, Splicing factor, arginine/serine-rich 2-interacting protein, Splicing regulatory protein 129, SRrp129	14	3.82772e+08
O75153	O75153	CLUH	Clustered mitochondria protein homolog	3.24612	0.0361724	0.0362883	0.0319897	0.0327235	0.0328283	0.0289396	0.0463862	0.040022	0.0412682	0.000429332	0.000419218	0.000373899	0.925559	1.04747	0.906023	0.959683	0.0766487	-0.0178721					Q92552	Q92552	MRPS27	28S ribosomal protein S27, mitochondrial, MRP-S27, S27mt, Mitochondrial ribosomal protein S27, Mitochondrial small ribosomal subunit protein mS27	10	2.02271	Yes		Q00325	Q00325	SLC25A3	Phosphate carrier protein, mitochondrial, Phosphate transport protein, PTP, Solute carrier family 25 member 3	25	5.36718e+09	6.3259e+09	5.39966e+09		Q99700	Q99700	ATXN2	Ataxin-2, Spinocerebellar ataxia type 2 protein, Trinucleotide repeat-containing gene 13 protein	14	2.83223e+08
Q8IWX8	Q8IWX8	CHERP	Calcium homeostasis endoplasmic reticulum protein, ERPROT 213-21, SR-related CTD-associated factor 6	3.00256	0.0159202	0.0146091	0.0162185	0.0141541	0.0129885	0.0144193	0.0202155	0.0209364	0.0159641	0.000185702	0.000165863	0.000186297	0.918609	0.792223	1.16698	0.959271	0.190658	-0.0180588					P26639	P26639	TARS1	Threonine--tRNA ligase 1, cytoplasmic, 6.1.1.3, Threonyl-tRNA synthetase, ThrRS, Threonyl-tRNA synthetase 1	10	1.80462	Yes		Q96KR1	Q96KR1	ZFR	Zinc finger RNA-binding protein, hZFR, M-phase phosphoprotein homolog	25	7.28302e+08	6.72307e+08	6.19814e+08		Q14562	Q14562	DHX8	ATP-dependent RNA helicase DHX8, 3.6.4.13, DEAH box protein 8, RNA helicase HRH1	14	4.65688e+08
Q9BQ39	Q9BQ39	DDX50	ATP-dependent RNA helicase DDX50, 3.6.4.13, DEAD box protein 50, Gu-beta, Nucleolar protein Gu2	4.0116	0.00366475	0.00362726	0.0029939	0.0034508	0.0034155	0.00281912	0.00511307	0.00507366	0.00322846	4.52745e-05	4.36159e-05	3.6423e-05	0.885468	0.859655	1.12818	0.957768	0.148147	-0.0187395					Q9Y262	Q9Y262	EIF3L	Eukaryotic translation initiation factor 3 subunit L, eIF3l, Eukaryotic translation initiation factor 3 subunit 6-interacting protein, Eukaryotic translation initiation factor 3 subunit E-interacting protein	10	1.34709	Yes		Q14C86	Q14C86	GAPVD1	GTPase-activating protein and VPS9 domain-containing protein 1, GAPex-5, Rab5-activating protein 6	25	6.89979e+08	5.31269e+08	5.64793e+08		Q13123	Q13123	IK	Protein Red, Cytokine IK, IK factor, Protein RER	14	7.16694e+08
Q7Z2T5	Q7Z2T5	TRMT1L	TRMT1-like protein, 2.1.1.-	-1.45064	0.00319309	0.00255726	0.00340388	0.000855301	0.000684987	0.000911765	0.00123061	0.00099857	0.00110042	1.12216e-05	8.74728e-06	1.178e-05	0.91187	0.875981	1.0705	0.952782	0.103511	-0.0210063					Q9UPT8	Q9UPT8	ZC3H4	Zinc finger CCCH domain-containing protein 4	10	1.01847	Yes		Q6UB35	Q6UB35	MTHFD1L	Monofunctional C1-tetrahydrofolate synthase, mitochondrial, 6.3.4.3, Formyltetrahydrofolate synthetase	25	6.84067e+08	4.41188e+08	6.02068e+08		O60524	O60524	NEMF	Ribosome quality control complex subunit NEMF, Antigen NY-CO-1, Nuclear export mediator factor, Serologically defined colon cancer antigen 1	14	3.01033e+08
Q8NAV1	Q8NAV1	PRPF38A	Pre-mRNA-splicing factor 38A	0.320771	0.00221981	0.00209439	0.00201308	0.00123279	0.00116314	0.00111798	0.00166339	0.00134953	0.00184433	1.61742e-05	1.48532e-05	1.44443e-05	0.972363	1.10062	0.783175	0.952054	0.159696	-0.0213384					P24752	P24752	ACAT1	Acetyl-CoA acetyltransferase, mitochondrial, 2.3.1.9, Acetoacetyl-CoA thiolase, T2	10	0.969526	Yes		P37802	P37802	TAGLN2	Transgelin-2, Epididymis tissue protein Li 7e, SM22-alpha homolog	25	4.51145e+09	3.06577e+09	3.88256e+09		Q9BRJ2	Q9BRJ2	MRPL45	39S ribosomal protein L45, mitochondrial, L45mt, MRP-L45, Mitochondrial large ribosomal subunit protein mL45	14	7.69215e+08
Q9H8Y5	Q9H8Y5	ANKZF1	Ankyrin repeat and zinc finger domain-containing protein 1, Zinc finger protein 744	6.37384	0.000753007	0.000805789	0.000305632	0.000744035	0.000796189	0.000301991	0.000939508	0.000843409	0.000645134	9.76174e-06	1.01673e-05	3.90172e-06	1.03903	1.2055	0.604792	0.949775	0.310142	-0.0223795					O75369	O75369	FLNB	Filamin-B, FLN-B, ABP-278, ABP-280 homolog, Actin-binding-like protein, Beta-filamin, Filamin homolog 1, Fh1, Filamin-3, Thyroid autoantigen, Truncated actin-binding protein, Truncated ABP	10	0.87405	Yes		Q96TA1	Q96TA1	NIBAN2	Protein Niban 2, Meg-3, Melanoma invasion by ERK, MINERVA, Niban-like protein 1, Protein FAM129B	25	1.07397e+09	7.37666e+08	9.43945e+08		Q9UBU9	Q9UBU9	NXF1	Nuclear RNA export factor 1, Tip-associated protein, Tip-associating protein, mRNA export factor TAP	14	1.79621e+08
Q8NEY8	Q8NEY8	PPHLN1	Periphilin-1, CDC7 expression repressor, CR, Gastric cancer antigen Ga50	2.15046	0.00267559	0.00277904	0.00417359	0.00218373	0.00226816	0.00340634	0.00405711	0.00353095	0.00333025	2.86505e-05	2.89644e-05	4.401e-05	0.706181	0.8203	1.32152	0.949334	0.327334	-0.0225812					P62249	P62249	RPS16	40S ribosomal protein S16, Small ribosomal subunit protein uS9	10	0.793215	Yes		P07737	P07737	PFN1	Profilin-1, Epididymis tissue protein Li 184a, Profilin I	25	1.87063e+10	1.96041e+10	1.66517e+10		P19525	P19525	EIF2AK2	Interferon-induced, double-stranded RNA-activated protein kinase, 2.7.11.1, Eukaryotic translation initiation factor 2-alpha kinase 2, eIF-2A protein kinase 2, Interferon-inducible RNA-dependent protein kinase, P1/eIF-2A protein kinase, Protein kinase RNA-activated, PKR, Protein kinase R, Tyrosine-protein kinase EIF2AK2, 2.7.10.2, p68 kinase	14	3.44e+08
Q5QJE6	Q5QJE6	DNTTIP2	Deoxynucleotidyltransferase terminal-interacting protein 2, Estrogen receptor-binding protein, LPTS-interacting protein 2, LPTS-RP2, Terminal deoxynucleotidyltransferase-interacting factor 2, TdIF2, TdT-interacting factor 2	2.84962	0.00737433	0.00932207	0.0089762	0.00647591	0.00818635	0.00788263	0.0108643	0.0128058	0.00821317	8.4964e-05	0.00010454	0.000101844	0.782046	0.816348	1.24	0.946132	0.255077	-0.024048					Q9H583	Q9H583	HEATR1	HEAT repeat-containing protein 1, Protein BAP28, U3 small nucleolar RNA-associated protein 10 homolog	10	0.583954	Yes		Q06830	Q06830	PRDX1	Peroxiredoxin-1, 1.11.1.24, Natural killer cell-enhancing factor A, NKEF-A, Proliferation-associated gene protein, PAG, Thioredoxin peroxidase 2, Thioredoxin-dependent peroxide reductase 2, Thioredoxin-dependent peroxiredoxin 1	25	3.2339e+10	3.0458e+10	2.96795e+10		Q8IYB7	Q8IYB7	DIS3L2	DIS3-like exonuclease 2, hDIS3L2, 3.1.13.-	14	1.63785e+08
P14678	P14678	SNRPB	Small nuclear ribonucleoprotein-associated proteins B and B', snRNP-B, Sm protein B/B', Sm-B/B', SmB/B'	4.80931	0.0328452	0.0286306	0.0293835	0.0317141	0.0276446	0.0283716	0.0415575	0.0402281	0.0382622	0.000416089	0.000353022	0.000366561	1.00124	0.87755	0.958022	0.945603	0.0627725	-0.0242911					P11388	P11388	TOP2A	DNA topoisomerase 2-alpha, 5.6.2.2, DNA topoisomerase II, alpha isozyme	10	0.465708	Yes		Q96HC4	Q96HC4	PDLIM5	PDZ and LIM domain protein 5, Enigma homolog, Enigma-like PDZ and LIM domains protein	25	1.54499e+09	1.23923e+09	1.2097e+09		Q9UNQ2	Q9UNQ2	DIMT1	Probable dimethyladenosine transferase, 2.1.1.183, DIM1 dimethyladenosine transferase 1 homolog, DIM1 dimethyladenosine transferase 1-like, Probable 18S rRNA (adenine(1779)-N(6)/adenine(1780)-N(6))-dimethyltransferase, Probable 18S rRNA dimethylase, Probable S-adenosylmethionine-6-N',N'-adenosyl(rRNA) dimethyltransferase	14	1.89683e+08
P40429	P40429	RPL13A	60S ribosomal protein L13a, 23 kDa highly basic protein, Large ribosomal subunit protein uL13	4.81615	0.0744897	0.0828087	0.0718341	0.0719361	0.07997	0.0693716	0.0948816	0.11338	0.0952507	0.000943802	0.00102122	0.000896281	0.994715	0.9007	0.940971	0.945462	0.0471684	-0.024356					P38117	P38117	ETFB	Electron transfer flavoprotein subunit beta, Beta-ETF	10	0.341135	Yes		Q96QK1	Q96QK1	VPS35	Vacuolar protein sorting-associated protein 35, hVPS35, Maternal-embryonic 3, Vesicle protein sorting 35	25	1.07774e+09	1.00068e+09	9.73133e+08		P26196	P26196	DDX6	Probable ATP-dependent RNA helicase DDX6, 3.6.4.13, ATP-dependent RNA helicase p54, DEAD box protein 6, Oncogene RCK	14	3.82965e+08
O75821	O75821	EIF3G	Eukaryotic translation initiation factor 3 subunit G, eIF3g, Eukaryotic translation initiation factor 3 RNA-binding subunit, eIF-3 RNA-binding subunit, Eukaryotic translation initiation factor 3 subunit 4, eIF-3-delta, eIF3 p42, eIF3 p44	3.5293	0.0225696	0.0234875	0.0268395	0.0207706	0.0216154	0.0247002	0.0293037	0.0345334	0.0289131	0.000272511	0.000276028	0.000319126	0.929952	0.799308	1.10374	0.944335	0.152727	-0.024874					O75390	O75390	CS	Citrate synthase, mitochondrial, 2.3.3.1, Citrate (Si)-synthase	10	0.272535	Yes		P52209	P52209	PGD	6-phosphogluconate dehydrogenase, decarboxylating, 1.1.1.44	25	2.36856e+09	2.25928e+09	2.4329e+09		O60716	O60716	CTNND1	Catenin delta-1, Cadherin-associated Src substrate, CAS, p120 catenin, p120(ctn), p120(cas)	14	1.31137e+08
P46087	P46087	NOP2	Probable 28S rRNA (cytosine(4447)-C(5))-methyltransferase, 2.1.1.-, Nucleolar protein 1, Nucleolar protein 2 homolog, Proliferating-cell nucleolar antigen p120, Proliferation-associated nucleolar protein p120	3.37346	0.0446705	0.0484254	0.0433136	0.0407395	0.0441639	0.039502	0.0552444	0.0615082	0.0542296	0.000534502	0.000563974	0.000510366	0.967523	0.916907	0.941121	0.94185	0.0253157	-0.0260181					P49368	P49368	CCT3	T-complex protein 1 subunit gamma, TCP-1-gamma, CCT-gamma, hTRiC5	10	0.216557	Yes		P61604	P61604	HSPE1	10 kDa heat shock protein, mitochondrial, Hsp10, 10 kDa chaperonin, Chaperonin 10, CPN10, Early-pregnancy factor, EPF	25	8.29209e+09	8.85816e+09	6.45045e+09		P62277	P62277	RPS13	40S ribosomal protein S13, Small ribosomal subunit protein uS15	14	1.76808e+09
O00442	O00442	RTCA	RNA 3'-terminal phosphate cyclase, RNA cyclase, RNA-3'-phosphate cyclase, 6.5.1.4, RNA terminal phosphate cyclase domain-containing protein 1, RTC domain-containing protein 1	2.5894	0.00626493	0.00635295	0.00594146	0.0053723	0.00544778	0.00509492	0.00756582	0.00805452	0.00639157	7.04846e-05	6.95681e-05	6.58263e-05	0.931618	0.863715	1.02989	0.941742	0.0835502	-0.0260681					P40763	P40763	STAT3	Signal transducer and activator of transcription 3, Acute-phase response factor	10	0.131708	Yes		Q9UMS4	Q9UMS4	PRPF19	Pre-mRNA-processing factor 19, 2.3.2.27, Nuclear matrix protein 200, PRP19/PSO4 homolog, hPso4, RING-type E3 ubiquitin transferase PRP19, Senescence evasion factor	25	2.7517e+09	1.89581e+09	2.53138e+09		Q9H9A6	Q9H9A6	LRRC40	Leucine-rich repeat-containing protein 40	14	2.1437e+08
Q9BZI7	Q9BZI7	UPF3B	Regulator of nonsense transcripts 3B, Nonsense mRNA reducing factor 3B, Up-frameshift suppressor 3 homolog B, hUpf3B, Up-frameshift suppressor 3 homolog on chromosome X, hUpf3p-X	4.34477	0.000591409	0.000609016	0.00040747	0.000563669	0.000580449	0.000388357	0.000555162	0.000943613	0.000718756	7.39533e-06	7.41234e-06	5.01757e-06	1.3321	0.785527	0.698092	0.938574	0.343599	-0.0275315					P08670	P08670	VIM	Vimentin	10	0.028218	Yes		Q99459	Q99459	CDC5L	Cell division cycle 5-like protein, Cdc5-like protein, Pombe cdc5-related protein	25	1.40151e+09	1.52461e+09	1.11308e+09		Q12788	Q12788	TBL3	Transducin beta-like protein 3, WD repeat-containing protein SAZD	14	9.32371e+07
Q9Y285	Q9Y285	FARSA	Phenylalanine--tRNA ligase alpha subunit, 6.1.1.20, CML33, Phenylalanyl-tRNA synthetase alpha subunit, PheRS	3.46961	0.018749	0.00852613	0.0106771	0.0171966	0.0078202	0.00979311	0.0178398	0.0124282	0.0183471	0.00022562	9.9864e-05	0.000126527	1.2647	0.803525	0.689628	0.919284	0.304511	-0.0365503					Q5JTZ9	Q5JTZ9	AARS2	Alanine--tRNA ligase, mitochondrial, 6.1.1.7, Alanyl-tRNA synthetase, AlaRS	10	0.0252562	Yes		P35237	P35237	SERPINB6	Serpin B6, Cytoplasmic antiproteinase, CAP, Peptidase inhibitor 6, PI-6, Placental thrombin inhibitor	25	2.24279e+09	1.59596e+09	1.85055e+09		P35573	P35573	AGL	Glycogen debranching enzyme, Glycogen debrancher, 4-alpha-glucanotransferase, 2.4.1.25, Oligo-1,4-1,4-glucantransferase, Amylo-alpha-1,6-glucosidase, Amylo-1,6-glucosidase, 3.2.1.33, Dextrin 6-alpha-D-glucosidase	14	1.52913e+08
Q9NVP1	Q9NVP1	DDX18	ATP-dependent RNA helicase DDX18, 3.6.4.13, DEAD box protein 18, Myc-regulated DEAD box protein, MrDb	1.96993	0.0191353	0.0204241	0.0174568	0.015244	0.0162707	0.0139069	0.0213579	0.0205213	0.0223387	0.000200001	0.000207777	0.000179677	0.936429	1.0125	0.804329	0.917752	0.105333	-0.0372748					Q9NYK5	Q9NYK5	MRPL39	39S ribosomal protein L39, mitochondrial, L39mt, MRP-L39, 39S ribosomal protein L5, mitochondrial, L5mt, MRP-L5, Mitochondrial large ribosomal subunit protein mL39	10	-0.119172	Yes		O14776	O14776	TCERG1	Transcription elongation regulator 1, TATA box-binding protein-associated factor 2S, Transcription factor CA150	25	1.01224e+09	1.0888e+09	9.27293e+08		P07237	P07237	P4HB	Protein disulfide-isomerase, PDI, 5.3.4.1, Cellular thyroid hormone-binding protein, Prolyl 4-hydroxylase subunit beta, p55	14	2.06611e+08
Q9H089	Q9H089	LSG1	Large subunit GTPase 1 homolog, hLsg1, 3.6.1.-	3.85433	0.00149965	0.00161856	0.00125064	0.00140267	0.00151389	0.00116976	0.00221392	0.00171372	0.00194097	1.8403e-05	1.93324e-05	1.51133e-05	0.831241	1.1281	0.778649	0.912662	0.188416	-0.03969					O14980	O14980	XPO1	Exportin-1, Exp1, Chromosome region maintenance 1 protein homolog	10	-0.179998	Yes		P14923	P14923	JUP	Junction plakoglobin, Catenin gamma, Desmoplakin III, Desmoplakin-3	25	1.4344e+09	1.59038e+09	1.07578e+09		Q99832	Q99832	CCT7	T-complex protein 1 subunit eta, TCP-1-eta, CCT-eta, HIV-1 Nef-interacting protein	14	1.27516e+08
Q15058	Q15058	KIF14	Kinesin-like protein KIF14	-0.129068	0.00154139	0.0010628	0.00135013	0.000736246	0.000507646	0.000644886	0.000881121	0.000881966	0.000935429	9.65954e-06	6.48264e-06	8.33193e-06	1.09628	0.735021	0.890707	0.907336	0.181202	-0.0422319					P06733	P06733	ENO1	Alpha-enolase, 4.2.1.11, 2-phospho-D-glycerate hydro-lyase, C-myc promoter-binding protein, Enolase 1, MBP-1, MPB-1, Non-neural enolase, NNE, Phosphopyruvate hydratase, Plasminogen-binding protein	10	-0.795352	Yes		P09651	P09651	HNRNPA1	Heterogeneous nuclear ribonucleoprotein A1, hnRNP A1, Helix-destabilizing protein, Single-strand RNA-binding protein, hnRNP core protein A1	24	3.50529e+10	4.79394e+10	4.25811e+10		P53396	P53396	ACLY	ATP-citrate synthase, 2.3.3.8, ATP-citrate (pro-S-)-lyase, ACL, Citrate cleavage enzyme	14	1.52206e+08
Q9BTC0	Q9BTC0	DIDO1	Death-inducer obliterator 1, DIO-1, hDido1, Death-associated transcription factor 1, DATF-1	2.74125	0.000969174	0.00145924	0.00134306	0.000843086	0.0012694	0.00116833	0.00166807	0.00171314	0.00136168	1.10613e-05	1.62102e-05	1.50948e-05	0.663119	0.946225	1.10854	0.905963	0.225425	-0.0428897					Q9UPQ9	Q9UPQ9	TNRC6B	Trinucleotide repeat-containing gene 6B protein	10	-10	No		P31943	P31943	HNRNPH1	Heterogeneous nuclear ribonucleoprotein H, hnRNP H	24	7.46515e+09	9.40555e+09	7.46153e+09		Q9Y6E2	Q9Y6E2	BZW2	eIF5-mimic protein 1, Basic leucine zipper and W2 domain-containing protein 2	14	3.07475e+08
Q86XL3	Q86XL3	ANKLE2	Ankyrin repeat and LEM domain-containing protein 2, LEM domain-containing protein 4	1.16352	0.00153098	0.00154917	0.00142301	0.00105846	0.00107103	0.000983816	0.00171139	0.00145679	0.00137963	1.3887e-05	1.36771e-05	1.27109e-05	0.811446	0.938851	0.92133	0.890542	0.0690572	-0.0503455					P39019	P39019	RPS19	40S ribosomal protein S19, Small ribosomal subunit protein eS19	9	6.33715	Yes		P98175	P98175	RBM10	RNA-binding protein 10, G patch domain-containing protein 9, RNA-binding motif protein 10, RNA-binding protein S1-1, S1-1	24	4.2466e+08	4.67343e+08	4.55157e+08		P34932	P34932	HSPA4	Heat shock 70 kDa protein 4, HSP70RY, Heat shock 70-related protein APG-2	14	2.85691e+08
Q9H0H5	Q9H0H5	RACGAP1	Rac GTPase-activating protein 1, Male germ cell RacGap, MgcRacGAP, Protein CYK4 homolog, CYK4, HsCYK-4	-0.0743437	0.00501189	0.00362585	0.00438056	0.00244139	0.00176623	0.00213386	0.00379341	0.00190059	0.00439184	3.2031e-05	2.25547e-05	2.75694e-05	0.844386	1.18672	0.627743	0.886283	0.281834	-0.0524276					P29558	P29558	RBMS1	RNA-binding motif, single-stranded-interacting protein 1, Single-stranded DNA-binding protein MSSP-1, Suppressor of CDC2 with RNA-binding motif 2	9	6.06557	Yes		O00425	O00425	IGF2BP3	Insulin-like growth factor 2 mRNA-binding protein 3, IGF2 mRNA-binding protein 3, IMP-3, IGF-II mRNA-binding protein 3, KH domain-containing protein overexpressed in cancer, hKOC, VICKZ family member 3	24	1.21821e+09	1.29257e+09	1.03598e+09		Q8IUH3	Q8IUH3	RBM45	RNA-binding protein 45, Developmentally-regulated RNA-binding protein 1, RB-1, RNA-binding motif protein 45	13	6.39615e+08
Q9Y2X3	Q9Y2X3	NOP58	Nucleolar protein 58, Nucleolar protein 5	2.43667	0.024785	0.022652	0.0271812	0.0209208	0.0191203	0.0229433	0.0309994	0.0328265	0.0288836	0.00027448	0.000244166	0.000296428	0.885439	0.743809	1.02628	0.885177	0.141237	-0.0529699					P62910	P62910	RPL32	60S ribosomal protein L32, Large ribosomal subunit protein eL32	9	5.60175	Yes		P78316	P78316	NOP14	Nucleolar protein 14, Nucleolar complex protein 14	24	4.71206e+08	4.72333e+08	4.57171e+08		Q9GZR2	Q9GZR2	REXO4	RNA exonuclease 4, 3.1.-.-, Exonuclease XPMC2, Prevents mitotic catastrophe 2 protein homolog, hPMC2	13	3.13844e+08
Q9BZZ5	Q9BZZ5	API5	Apoptosis inhibitor 5, API-5, Antiapoptosis clone 11 protein, AAC-11, Cell migration-inducing gene 8 protein, Fibroblast growth factor 2-interacting factor, FIF, Protein XAGL	2.26513	0.0062914	0.00566335	0.00666071	0.00520798	0.00468808	0.00551369	0.0100591	0.00608082	0.00743099	6.83287e-05	5.98668e-05	7.12369e-05	0.679274	0.984518	0.958647	0.874146	0.169259	-0.0584159					Q13595	Q13595	TRA2A	Transformer-2 protein homolog alpha, TRA-2 alpha, TRA2-alpha, Transformer-2 protein homolog A	9	5.38678	Yes		P62277	P62277	RPS13	40S ribosomal protein S13, Small ribosomal subunit protein uS15	24	8.86911e+09	9.95625e+09	8.89132e+09		Q9NTZ6	Q9NTZ6	RBM12	RNA-binding protein 12, RNA-binding motif protein 12, SH3/WW domain anchor protein in the nucleus, SWAN	13	3.93317e+08
Q9C0D5	Q9C0D5	TANC1	Protein TANC1, Tetratricopeptide repeat, ankyrin repeat and coiled-coil domain-containing protein 1	1.15965	0.000625466	0.000534725	0.000944542	0.000432065	0.000369382	0.000652478	0.000677401	0.000719952	0.000750853	5.66869e-06	4.71701e-06	8.43002e-06	0.836829	0.655184	1.12273	0.87158	0.235701	-0.0596928					P61353	P61353	RPL27	60S ribosomal protein L27, Large ribosomal subunit protein eL27	9	5.29526	Yes		Q02218	Q02218	OGDH	2-oxoglutarate dehydrogenase complex component E1, E1o, OGDC-E1, OGDH-E1, 1.2.4.2, 2-oxoglutarate dehydrogenase, mitochondrial, Alpha-ketoglutarate dehydrogenase, Alpha-KGDH-E1, Thiamine diphosphate (ThDP)-dependent 2-oxoglutarate dehydrogenase	24	7.01046e+08	4.5669e+08	6.58509e+08		Q9P015	Q9P015	MRPL15	39S ribosomal protein L15, mitochondrial, L15mt, MRP-L15, Mitochondrial large ribosomal subunit protein uL15m	13	3.89115e+08
O96013	O96013	PAK4	Serine/threonine-protein kinase PAK 4, 2.7.11.1, p21-activated kinase 4, PAK-4	10	0.000187259	0.000194731	0.000239486	0.000187077	0.000194541	0.000239252	0.000363583	0.000299517	0.00027914	2.45445e-06	2.48428e-06	3.09113e-06	0.675071	0.829429	1.10738	0.870626	0.219079	-0.0601682					Q86V81	Q86V81	ALYREF	THO complex subunit 4, Tho4, Ally of AML-1 and LEF-1, Aly/REF export factor, Transcriptional coactivator Aly/REF, bZIP-enhancing factor BEF	9	5.00246	Yes		P18621	P18621	RPL17	60S ribosomal protein L17, 60S ribosomal protein L23, Large ribosomal subunit protein uL22, PD-1	24	6.57792e+09	7.1735e+09	8.29572e+09		O75683	O75683	SURF6	Surfeit locus protein 6	13	4.34951e+08
Q69YN4	Q69YN4	VIRMA	Protein virilizer homolog	2.90337	0.000790559	0.00089305	0.000419084	0.000697352	0.000787759	0.000369674	0.00105887	0.000859949	0.000841431	9.14925e-06	1.00597e-05	4.77618e-06	0.864061	1.1698	0.567626	0.867162	0.301099	-0.0618997					P08708	P08708	RPS17	40S ribosomal protein S17, Small ribosomal subunit protein eS17	9	4.6802	Yes		P21399	P21399	ACO1	Cytoplasmic aconitate hydratase, Aconitase, 4.2.1.3, Citrate hydro-lyase, Ferritin repressor protein, Iron regulatory protein 1, IRP1, Iron-responsive element-binding protein 1, IRE-BP 1	24	7.56901e+08	4.02652e+08	5.88301e+08		Q86UE4	Q86UE4	MTDH	Protein LYRIC, 3D3/LYRIC, Astrocyte elevated gene-1 protein, AEG-1, Lysine-rich CEACAM1 co-isolated protein, Metadherin, Metastasis adhesion protein	13	5.86649e+08
P62899	P62899	RPL31	60S ribosomal protein L31, Large ribosomal subunit protein eL31	3.05987	0.120278	0.119902	0.0921973	0.107398	0.107063	0.082325	0.123731	0.179942	0.15277	0.00140907	0.00136719	0.00106364	1.13882	0.759797	0.696234	0.864949	0.239296	-0.0630095					P46776	P46776	RPL27A	60S ribosomal protein L27a, Large ribosomal subunit protein uL15	9	4.46271	Yes		P46060	P46060	RANGAP1	Ran GTPase-activating protein 1, RanGAP1	24	1.54479e+09	1.01502e+09	1.32697e+09		Q9BZZ5	Q9BZZ5	API5	Apoptosis inhibitor 5, API-5, Antiapoptosis clone 11 protein, AAC-11, Cell migration-inducing gene 8 protein, Fibroblast growth factor 2-interacting factor, FIF, Protein XAGL	13	3.67569e+08
Q96D46	Q96D46	NMD3	60S ribosomal export protein NMD3, hNMD3	3.28464	0.00770263	0.00639803	0.00628318	0.00698577	0.00580258	0.00569842	0.00958467	0.00927776	0.0091066	9.16533e-05	7.40989e-05	7.36236e-05	0.956248	0.798672	0.808464	0.854461	0.0882858	-0.0683075					P62888	P62888	RPL30	60S ribosomal protein L30, Large ribosomal subunit protein eL30	9	4.45516	Yes		P83731	P83731	RPL24	60S ribosomal protein L24, 60S ribosomal protein L30, Large ribosomal subunit protein eL24	24	6.25106e+09	8.44374e+09	6.7766e+09		Q06787	Q06787	FMR1	Fragile X messenger ribonucleoprotein 1, Fragile X messenger ribonucleoprotein, FMRP, Protein FMR-1	13	6.28422e+08
O75533	O75533	SF3B1	Splicing factor 3B subunit 1, Pre-mRNA-splicing factor SF3b 155 kDa subunit, SF3b155, Spliceosome-associated protein 155, SAP 155	3.0454	0.024351	0.0213778	0.0249806	0.0217201	0.0190681	0.0222817	0.0358215	0.0307406	0.0312184	0.000284968	0.0002435	0.00028788	0.795521	0.792112	0.922148	0.836594	0.0741118	-0.0774853					Q96MU7	Q96MU7	YTHDC1	YTH domain-containing protein 1, Splicing factor YT521, YT521-B	9	4.04319	Yes		Q15084	Q15084	PDIA6	Protein disulfide-isomerase A6, 5.3.4.1, Endoplasmic reticulum protein 5, ER protein 5, ERp5, Protein disulfide isomerase P5, Thioredoxin domain-containing protein 7	24	2.63513e+09	1.60086e+09	2.39144e+09		Q9HCD5	Q9HCD5	NCOA5	Nuclear receptor coactivator 5, NCoA-5, Coactivator independent of AF-2, CIA	13	1.53343e+08
O00541	O00541	PES1	Pescadillo homolog	4.05255	0.0325923	0.031627	0.0338896	0.0307398	0.0298294	0.0319633	0.0521389	0.0482811	0.0441472	0.000403307	0.000380921	0.000412966	0.773523	0.788965	0.935429	0.832639	0.0893532	-0.0795432					Q9BQ39	Q9BQ39	DDX50	ATP-dependent RNA helicase DDX50, 3.6.4.13, DEAD box protein 50, Gu-beta, Nucleolar protein Gu2	9	4.0116	Yes		P27797	P27797	CALR	Calreticulin, CRP55, Calregulin, Endoplasmic reticulum resident protein 60, ERp60, HACBP, grp60	24	8.53831e+09	6.96429e+09	6.42995e+09		Q96PZ0	Q96PZ0	PUS7	Pseudouridylate synthase 7 homolog, 5.4.99.-	13	2.57601e+08
Q9UBU9	Q9UBU9	NXF1	Nuclear RNA export factor 1, Tip-associated protein, Tip-associating protein, mRNA export factor TAP	3.24032	0.00307443	0.00206838	0.00292207	0.00278023	0.00187045	0.00264244	0.0048477	0.00367941	0.00311783	3.64766e-05	2.38857e-05	3.41404e-05	0.752451	0.649173	1.09501	0.83221	0.233372	-0.0797673					Q96QR8	Q96QR8	PURB	Transcriptional activator protein Pur-beta, Purine-rich element-binding protein B	9	3.90485	Yes		Q8TDN6	Q8TDN6	BRIX1	Ribosome biogenesis protein BRX1 homolog, Brix domain-containing protein 2	24	3.15748e+09	3.70917e+09	3.32877e+09		O60869	O60869	EDF1	Endothelial differentiation-related factor 1, EDF-1, Multiprotein-bridging factor 1, MBF1	13	1.23712e+09
O00567	O00567	NOP56	Nucleolar protein 56, Nucleolar protein 5A	3.23579	0.031763	0.0234513	0.0288742	0.0287149	0.0212008	0.0261033	0.0408384	0.0396157	0.0388295	0.000376739	0.000270734	0.000337255	0.922512	0.683399	0.868553	0.824821	0.125411	-0.0836402					Q5T653	Q5T653	MRPL2	39S ribosomal protein L2, mitochondrial, L2mt, MRP-L2, Mitochondrial large ribosomal subunit protein uL2m	9	3.64087	Yes		Q8TCS8	Q8TCS8	PNPT1	Polyribonucleotide nucleotidyltransferase 1, mitochondrial, 2.7.7.8, 3'-5' RNA exonuclease OLD35, PNPase old-35, Polynucleotide phosphorylase 1, PNPase 1, Polynucleotide phosphorylase-like protein	24	1.25115e+09	1.30545e+09	9.83068e+08		Q9BSC4	Q9BSC4	NOL10	Nucleolar protein 10	13	3.03769e+08
Q9UG63	Q9UG63	ABCF2	ATP-binding cassette sub-family F member 2, Iron-inhibited ABC transporter 2	1.95125	0.019706	0.0191566	0.0173723	0.0156572	0.0152207	0.0138029	0.0261006	0.0209183	0.0237479	0.000205422	0.000194368	0.000178334	0.787038	0.929177	0.750946	0.822387	0.0942273	-0.0849237					Q9UNX4	Q9UNX4	WDR3	WD repeat-containing protein 3	9	3.46578	Yes		P62829	P62829	RPL23	60S ribosomal protein L23, 60S ribosomal protein L17, Large ribosomal subunit protein uL14	24	8.14669e+09	9.59501e+09	8.07988e+09		P46776	P46776	RPL27A	60S ribosomal protein L27a, Large ribosomal subunit protein uL15	13	2.26964e+09
P84098	P84098	RPL19	60S ribosomal protein L19, Large ribosomal subunit protein eL19	5.35093	0.070353	0.0650042	0.0661448	0.0686704	0.0634495	0.0645629	0.0925962	0.113111	0.108811	0.000900956	0.000810251	0.000834153	0.972994	0.716334	0.766608	0.818645	0.136013	-0.0869044					Q96D46	Q96D46	NMD3	60S ribosomal export protein NMD3, hNMD3	9	3.28464	Yes		P18583	P18583	SON	Protein SON, Bax antagonist selected in saccharomyces 1, BASS1, Negative regulatory element-binding protein, NRE-binding protein, Protein DBP-5, SON3	24	6.94775e+08	7.16368e+08	6.42438e+08		Q96AG4	Q96AG4	LRRC59	Leucine-rich repeat-containing protein 59, Ribosome-binding protein p34, p34	13	6.32811e+08
P19525	P19525	EIF2AK2	Interferon-induced, double-stranded RNA-activated protein kinase, 2.7.11.1, Eukaryotic translation initiation factor 2-alpha kinase 2, eIF-2A protein kinase 2, Interferon-inducible RNA-dependent protein kinase, P1/eIF-2A protein kinase, Protein kinase RNA-activated, PKR, Protein kinase R, Tyrosine-protein kinase EIF2AK2, 2.7.10.2, p68 kinase	4.23563	0.00588799	0.00532229	0.00556698	0.0055912	0.00505401	0.00528637	0.00899501	0.00871346	0.00767554	7.33565e-05	6.45397e-05	6.82998e-05	0.815524	0.74069	0.889837	0.81535	0.0745739	-0.0886557					Q8IUH3	Q8IUH3	RBM45	RNA-binding protein 45, Developmentally-regulated RNA-binding protein 1, RB-1, RNA-binding motif protein 45	9	3.01405	Yes		P62241	P62241	RPS8	40S ribosomal protein S8, Small ribosomal subunit protein eS8	24	1.19938e+10	1.65763e+10	1.34884e+10		P62910	P62910	RPL32	60S ribosomal protein L32, Large ribosomal subunit protein eL32	13	1.10048e+09
Q06787	Q06787	FMR1	Fragile X messenger ribonucleoprotein 1, Fragile X messenger ribonucleoprotein, FMRP, Protein FMR-1	-2.15269	0.0107562	0.0109283	0.0100357	0.00197487	0.00200645	0.00184258	0.0032053	0.00258489	0.00372772	2.59103e-05	2.56224e-05	2.38062e-05	0.808357	0.991237	0.638624	0.812739	0.176347	-0.0900487					Q969X6	Q969X6	UTP4	U3 small nucleolar RNA-associated protein 4 homolog, Cirhin, UTP4 small subunit processome component	9	2.76251	Yes		P08559	P08559	PDHA1	Pyruvate dehydrogenase E1 component subunit alpha, somatic form, mitochondrial, 1.2.4.1, PDHE1-A type I	24	1.08889e+09	8.22586e+08	1.01828e+09		P20290	P20290	BTF3	Transcription factor BTF3, Nascent polypeptide-associated complex subunit beta, NAC-beta, RNA polymerase B transcription factor 3	13	9.5051e+08
Q9NX20	Q9NX20	MRPL16	39S ribosomal protein L16, mitochondrial, L16mt, MRP-L16, Mitochondrial large ribosomal subunit protein uL16m	10	0.00175374	0.00163123	0.00139016	0.00175203	0.00162963	0.00138881	0.00264924	0.00230433	0.0027571	2.29866e-05	2.08104e-05	1.79434e-05	0.867668	0.903102	0.650807	0.807192	0.136588	-0.0930231					P62826	P62826	RAN	GTP-binding nuclear protein Ran, 3.6.5.-, Androgen receptor-associated protein 24, GTPase Ran, Ras-like protein TC4, Ras-related nuclear protein	9	2.41989	Yes		P40925	P40925	MDH1	Malate dehydrogenase, cytoplasmic, 1.1.1.37, Aromatic alpha-keto acid reductase, KAR, 1.1.1.96, Cytosolic malate dehydrogenase	24	3.87788e+09	3.63676e+09	3.7768e+09		P53621	P53621	COPA	Coatomer subunit alpha, Alpha-coat protein, Alpha-COP, HEP-COP, HEPCOP	13	3.07695e+09
P33981	P33981	TTK	Dual specificity protein kinase TTK, 2.7.12.1, Phosphotyrosine picked threonine-protein kinase, PYT	1.26737	0.000399293	0.000452644	0.000379866	0.000282103	0.000319796	0.000268378	0.000748688	0.000323416	0.000522204	3.7012e-06	4.08379e-06	3.46744e-06	0.494358	1.2627	0.664001	0.807021	0.403646	-0.0931152					Q13435	Q13435	SF3B2	Splicing factor 3B subunit 2, Pre-mRNA-splicing factor SF3b 145 kDa subunit, SF3b145, Spliceosome-associated protein 145, SAP 145	9	2.32931	Yes		O00232	O00232	PSMD12	26S proteasome non-ATPase regulatory subunit 12, 26S proteasome regulatory subunit RPN5, 26S proteasome regulatory subunit p55	24	1.39137e+09	1.1669e+09	1.26231e+09		P49591	P49591	SARS1	Serine--tRNA ligase, cytoplasmic, 6.1.1.11, Seryl-tRNA synthetase, SerRS, Seryl-tRNA(Ser/Sec) synthetase	13	1.88112e+08
P30419	P30419	NMT1	Glycylpeptide N-tetradecanoyltransferase 1, 2.3.1.97, Myristoyl-CoA:protein N-myristoyltransferase 1, HsNMT1, NMT 1, Type I N-myristoyltransferase, Peptide N-myristoyltransferase 1, Protein-lysine myristoyltransferase NMT1, 2.3.1.-	3.63827	0.00720248	0.00705292	0.00725811	0.00666705	0.00652861	0.00671854	0.0133451	0.00914919	0.0101655	8.74717e-05	8.33704e-05	8.68035e-05	0.655459	0.911232	0.853903	0.806865	0.134218	-0.0931994					Q9Y2R9	Q9Y2R9	MRPS7	28S ribosomal protein S7, mitochondrial, MRP-S7, S7mt, Mitochondrial small ribosomal subunit protein uS7m, bMRP-27a, bMRP27a	9	2.09299	Yes		O00469	O00469	PLOD2	Procollagen-lysine,2-oxoglutarate 5-dioxygenase 2, 1.14.11.4, Lysyl hydroxylase 2, LH2	24	8.37586e+08	6.81468e+08	7.84768e+08		Q14008	Q14008	CKAP5	Cytoskeleton-associated protein 5, Colonic and hepatic tumor overexpressed gene protein, Ch-TOG	13	1.0698e+08
O43148	O43148	RNMT	mRNA cap guanine-N7 methyltransferase, 2.1.1.56, RG7MT1, mRNA (guanine-N(7))-methyltransferase, mRNA cap methyltransferase, hCMT1, hMet, hcm1p	3.56886	0.00126007	0.00125911	0.00127099	0.00116213	0.00116125	0.00117221	0.00252178	0.00191009	0.00147029	1.52472e-05	1.48292e-05	1.5145e-05	0.604619	0.776362	1.03007	0.803683	0.214037	-0.094915					P62244	P62244	RPS15A	40S ribosomal protein S15a, Small ribosomal subunit protein uS8	9	2.08227	Yes		Q9Y263	Q9Y263	PLAA	Phospholipase A-2-activating protein, PLA2P, PLAP	24	5.59355e+08	4.84467e+08	4.6522e+08		Q9Y3F4	Q9Y3F4	STRAP	Serine-threonine kinase receptor-associated protein, MAP activator with WD repeats, UNR-interacting protein, WD-40 repeat protein PT-WD	13	2.30257e+08
P55081	P55081	MFAP1	Microfibrillar-associated protein 1, Spliceosome B complex protein MFAP1	1.60457	0.00590055	0.00594753	0.00836771	0.0044404	0.00447576	0.00629704	0.00743562	0.00926066	0.00809313	5.82581e-05	5.71554e-05	8.13577e-05	0.7835	0.617185	1.00527	0.801985	0.194701	-0.0958339					Q96DH6	Q96DH6	MSI2	RNA-binding protein Musashi homolog 2, Musashi-2	9	1.69536	Yes		Q9Y617	Q9Y617	PSAT1	Phosphoserine aminotransferase, 2.6.1.52, Phosphohydroxythreonine aminotransferase, PSAT	24	1.7372e+09	1.37124e+09	1.56641e+09		P62249	P62249	RPS16	40S ribosomal protein S16, Small ribosomal subunit protein uS9	13	1.51378e+09
Q02241	Q02241	KIF23	Kinesin-like protein KIF23, Kinesin-like protein 5, Mitotic kinesin-like protein 1	-0.205131	0.00482527	0.00387834	0.00454167	0.0022414	0.00180154	0.00210966	0.00410053	0.00289019	0.0030914	2.94072e-05	2.30056e-05	2.72569e-05	0.717156	0.795991	0.8817	0.798283	0.0822963	-0.0978434					P62937	P62937	PPIA	Peptidyl-prolyl cis-trans isomerase A, PPIase A, 5.2.1.8, Cyclophilin A, Cyclosporin A-binding protein, Rotamase A	9	1.12932	Yes		O14818	O14818	PSMA7	Proteasome subunit alpha type-7, Proteasome subunit RC6-1, Proteasome subunit XAPC7	24	3.02153e+09	2.63106e+09	2.81097e+09		P17987	P17987	TCP1	T-complex protein 1 subunit alpha, TCP-1-alpha, CCT-alpha	13	1.23428e+09
Q9NP92	Q9NP92	MRPS30	39S ribosomal protein S30, mitochondrial, MRP-S30, S30mt, Mitochondrial large ribosomal subunit protein mL65, Mitochondrial large ribosomal subunit protein mS30, Programmed cell death protein 9	2.12827	0.00165677	0.00164784	0.00152075	0.00134836	0.00134109	0.00123766	0.00265581	0.00183221	0.00201959	1.76905e-05	1.71257e-05	1.59906e-05	0.666104	0.934706	0.791775	0.797528	0.134394	-0.0982539					Q13206	Q13206	DDX10	Probable ATP-dependent RNA helicase DDX10, 3.6.4.13, DEAD box protein 10	9	0.891159	Yes		Q13616	Q13616	CUL1	Cullin-1, CUL-1	24	7.48589e+08	6.24242e+08	7.1519e+08		P62244	P62244	RPS15A	40S ribosomal protein S15a, Small ribosomal subunit protein uS8	13	8.21031e+08
Q9Y4Z0	Q9Y4Z0	LSM4	U6 snRNA-associated Sm-like protein LSm4, Glycine-rich protein, GRP	5.27573	0.00262405	0.00256912	0.00215201	0.00255802	0.00250447	0.00209786	0.00417185	0.00378728	0.0037509	3.35612e-05	3.19821e-05	2.71044e-05	0.804468	0.844463	0.722609	0.790513	0.0621141	-0.102091					Q6PI48	Q6PI48	DARS2	Aspartate--tRNA ligase, mitochondrial, 6.1.1.12, Aspartyl-tRNA synthetase, AspRS	9	0.681489	Yes		P31153	P31153	MAT2A	S-adenosylmethionine synthase isoform type-2, AdoMet synthase 2, 2.5.1.6, Methionine adenosyltransferase 2, MAT 2, Methionine adenosyltransferase II, MAT-II	24	2.5435e+09	2.56239e+09	3.20645e+09		P52701	P52701	MSH6	DNA mismatch repair protein Msh6, hMSH6, G/T mismatch-binding protein, GTBP, GTMBP, MutS protein homolog 6, MutS-alpha 160 kDa subunit, p160	13	8.92899e+07
P61254	P61254	RPL26	60S ribosomal protein L26, Large ribosomal subunit protein uL24	2.88749	0.135852	0.118948	0.122158	0.119679	0.104787	0.107615	0.158524	0.211764	0.188437	0.00157019	0.00133813	0.00139039	0.990506	0.631897	0.737853	0.786752	0.184237	-0.104162					P52292	P52292	KPNA2	Importin subunit alpha-1, Karyopherin subunit alpha-2, RAG cohort protein 1, SRP1-alpha	9	0.617741	Yes		P50570	P50570	DNM2	Dynamin-2, 3.6.5.5	24	7.63084e+08	4.74795e+08	7.07009e+08		P48643	P48643	CCT5	T-complex protein 1 subunit epsilon, TCP-1-epsilon, CCT-epsilon	13	2.31475e+08
Q10713	Q10713	PMPCA	Mitochondrial-processing peptidase subunit alpha, Alpha-MPP, Inactive zinc metalloprotease alpha, P-55	3.92281	0.048736	0.0509169	0.0327716	0.0457213	0.0477674	0.0307444	0.0621804	0.0835838	0.0603331	0.000599864	0.00060999	0.000397218	0.964715	0.729794	0.658375	0.784295	0.160277	-0.105521					O15091	O15091	PRORP	Mitochondrial ribonuclease P catalytic subunit, 3.1.26.5, Mitochondrial ribonuclease P protein 3, Mitochondrial RNase P protein 3, Protein only RNase P catalytic subunit	9	0.482465	Yes		P43490	P43490	NAMPT	Nicotinamide phosphoribosyltransferase, NAmPRTase, Nampt, 2.4.2.12, Pre-B-cell colony-enhancing factor 1, Pre-B cell-enhancing factor, Visfatin	24	1.56272e+09	1.14691e+09	1.35155e+09		P55072	P55072	VCP	Transitional endoplasmic reticulum ATPase, TER ATPase, 3.6.4.6, 15S Mg(2+)-ATPase p97 subunit, Valosin-containing protein, VCP	13	2.38958e+08
P46783	P46783	RPS10	40S ribosomal protein S10, Small ribosomal subunit protein eS10	5.37266	0.0409407	0.0429285	0.041158	0.0399758	0.0419168	0.040188	0.073441	0.0562298	0.0779212	0.000524483	0.000535278	0.000519229	0.714155	0.951947	0.666351	0.777484	0.152968	-0.109308					Q15031	Q15031	LARS2	Leucine--tRNA ligase, mitochondrial, 6.1.1.4, Leucyl-tRNA synthetase, LeuRS	9	0.230497	Yes		P62195	P62195	PSMC5	26S proteasome regulatory subunit 8, 26S proteasome AAA-ATPase subunit RPT6, Proteasome 26S subunit ATPase 5, Proteasome subunit p45, Thyroid hormone receptor-interacting protein 1, TRIP1, p45/SUG	24	1.04479e+09	9.3544e+08	1.10262e+09		Q9UPQ9	Q9UPQ9	TNRC6B	Trinucleotide repeat-containing gene 6B protein	13	7.48512e+07
Q8TDN6	Q8TDN6	BRIX1	Ribosome biogenesis protein BRX1 homolog, Brix domain-containing protein 2	4.44131	0.0405609	0.0359654	0.0318249	0.0387761	0.0343828	0.0304245	0.0540469	0.0634897	0.0569783	0.000508743	0.000439068	0.000393085	0.941298	0.691558	0.689885	0.774247	0.144673	-0.11112					O95573	O95573	ACSL3	Fatty acid CoA ligase Acsl3, Arachidonate--CoA ligase, 6.2.1.15, Long-chain acyl-CoA synthetase 3, LACS 3, Long-chain-fatty-acid--CoA ligase 3, 6.2.1.3, Medium-chain acyl-CoA ligase Acsl3, 6.2.1.2	9	0.175758	Yes		Q9UGI8	Q9UGI8	TES	Testin, TESS	24	1.07863e+09	9.93157e+08	9.34397e+08		Q14011	Q14011	CIRBP	Cold-inducible RNA-binding protein, A18 hnRNP, Glycine-rich RNA-binding protein CIRP	12	3.47837e+09
Q01081	Q01081	U2AF1	Splicing factor U2AF 35 kDa subunit, U2 auxiliary factor 35 kDa subunit, U2 small nuclear RNA auxiliary factor 1, U2 snRNP auxiliary factor small subunit	2.49373	0.00780381	0.0104672	0.0100924	0.00662718	0.00888903	0.00857072	0.0175842	0.014948	0.010371	8.69486e-05	0.000113513	0.000110734	0.49447	0.759387	1.06772	0.77386	0.2869	-0.111338					Q9BSC4	Q9BSC4	NOL10	Nucleolar protein 10	9	-0.042095	Yes		P07954	P07954	FH	Fumarate hydratase, mitochondrial, Fumarase, HsFH, 4.2.1.2	24	1.93976e+09	1.53308e+09	1.6193e+09		Q8ND56	Q8ND56	LSM14A	Protein LSM14 homolog A, Protein FAM61A, Protein SCD6 homolog, Putative alpha-synuclein-binding protein, AlphaSNBP, RNA-associated protein 55A, hRAP55, hRAP55A	12	7.67139e+08
Q9P2E9	Q9P2E9	RRBP1	Ribosome-binding protein 1, 180 kDa ribosome receptor homolog, RRp, ES/130-related protein, Ribosome receptor protein	2.4071	0.00639778	0.0093773	0.0111084	0.00538292	0.0078898	0.00934632	0.016951	0.0117928	0.0118216	7.06239e-05	0.000100753	0.000120754	0.416634	0.854355	1.02148	0.764155	0.312346	-0.116819					P78371	P78371	CCT2	T-complex protein 1 subunit beta, TCP-1-beta, CCT-beta	9	-0.925345	Yes		Q9Y6E2	Q9Y6E2	BZW2	eIF5-mimic protein 1, Basic leucine zipper and W2 domain-containing protein 2	24	1.31757e+09	1.37214e+09	1.24277e+09		Q9BVS4	Q9BVS4	RIOK2	Serine/threonine-protein kinase RIO2, 2.7.11.1, RIO kinase 2	12	2.1624e+09
Q9H6R0	Q9H6R0	DHX33	ATP-dependent RNA helicase DHX33, 3.6.4.13, DEAH box protein 33	3.48883	0.0026857	0.00175251	0.00208761	0.00246604	0.00160917	0.00191686	0.00318989	0.00353613	0.00369838	3.23544e-05	2.05491e-05	2.47659e-05	1.01428	0.58112	0.669641	0.755014	0.228853	-0.122045					Q8N983	Q8N983	MRPL43	39S ribosomal protein L43, mitochondrial, L43mt, MRP-L43, Mitochondrial large ribosomal subunit protein mL43, Mitochondrial ribosomal protein bMRP36a	9	-1.16103	Yes		O43684	O43684	BUB3	Mitotic checkpoint protein BUB3	24	2.17435e+09	2.24951e+09	1.87193e+09		P35268	P35268	RPL22	60S ribosomal protein L22, EBER-associated protein, EAP, Epstein-Barr virus small RNA-associated protein, Heparin-binding protein HBp15, Large ribosomal subunit protein eL22	12	3.65958e+10
P27708	P27708	CAD	CAD protein, Glutamine-dependent carbamoyl-phosphate synthase, 6.3.5.5, Aspartate carbamoyltransferase, 2.1.3.2, Dihydroorotase, 3.5.2.3	-1.49599	0.0645393	0.0747255	0.117903	0.0168926	0.0195587	0.03086	0.0505542	0.0527468	0.0297987	0.00022163	0.000249765	0.000398711	0.438402	0.473516	1.33802	0.749979	0.509559	-0.124951					Q86VP1	Q86VP1	TAX1BP1	Tax1-binding protein 1, TRAF6-binding protein	9	-1.43471	Yes		P55084	P55084	HADHB	Trifunctional enzyme subunit beta, mitochondrial, TP-beta, 3-ketoacyl-CoA thiolase, 2.3.1.155, 2.3.1.16, Acetyl-CoA acyltransferase, Beta-ketothiolase	24	1.40916e+09	1.23247e+09	1.37674e+09		Q9NUQ6	Q9NUQ6	SPATS2L	SPATS2-like protein, DNA polymerase-transactivated protein 6, Stress granule and nucleolar protein, SGNP	12	3.19863e+08
Q9HCD5	Q9HCD5	NCOA5	Nuclear receptor coactivator 5, NCoA-5, Coactivator independent of AF-2, CIA	4.53327	0.00262466	0.00265781	0.00257393	0.002516	0.00254778	0.00246737	0.0058073	0.00344468	0.00442942	3.301e-05	3.25351e-05	3.18785e-05	0.568422	0.944502	0.719698	0.744207	0.189234	-0.128306					Q7Z2T5	Q7Z2T5	TRMT1L	TRMT1-like protein, 2.1.1.-	9	-1.45064	Yes		Q8NBS9	Q8NBS9	TXNDC5	Thioredoxin domain-containing protein 5, 1.8.4.-, 5.3.4.1, Endoplasmic reticulum resident protein 46, ER protein 46, ERp46, Thioredoxin-like protein p46	24	2.80013e+09	2.11619e+09	2.23934e+09		Q9P031	Q9P031	CCDC59	Thyroid transcription factor 1-associated protein 26, TTF-1-associated protein 26, Coiled-coil domain-containing protein 59, TTF-1-associated protein BR2	12	3.2679e+08
[truncated: 3,390 more rows]
[truncated: 2 more columns]
