# Supplementary material
Source: HighWire-hosted journal article supplement (doi:10.1101/rna.079848.123)
Supplement: Supplemental_Table_S2.xlsx [file Supplemental_Table_S2.xlsx]

## Sheet: Supplemental Table S2
Supplemental Table S2
Human reference proteome was downloaded from UniProt on 2023/05/03.
One UniProt ID was selected for each primary gene name based on annotation score. In the event of a tie, the UniProt ID containing the highest number of mapped Pfam IDs was chosen; typically, these contain the most complete/annotated protein sequence.
Pfam and InterPro data was download from the InterPro website on 2023/05/03. Current release data indicated above each list.
Complete lists of assigned UniProt ID and mapped Pfam and InterPro IDs are included to the right. Note that UniProt IDs are repeated for each mapped ID.
						Duplicates Removed					Current release: 1/3/2023 7:00:00 PM						Current release: 1/3/2023 7:00:00 PM													Current release: 5/9/2023 10:09:00 PM
UniProt ID	Entry name	Primary gene name	Annotation score	Assigned UniProt ID		Assigned UniProt ID	Primary gene name	Protein name	Annotation score		Pfam ID	Type	Name	Description	Pfam Clan		Pfam clan ID	Name	Description	Reference 1	Reference 2	Reference 3	Reference 4	Reference 5	Reference 6	Reference 7				ENTRY_AC (InterPro ID)	ENTRY_TYPE	ENTRY_NAME					Assigned UniProt ID	Mapped Pfam ID		Assigned UniProt ID	Mapped Pfam clan ID		Assigned Uniprot ID	Mapped InterPro ID
A0A023I7H5	A0A023I7H5_HUMAN	ATP6	2	A0A023I7H5		A0A023I7H5	ATP6	ATP synthase subunit a	2		PF00001	Family	7tm_1	7 transmembrane receptor (rhodopsin family)	CL0192		CL0001	EGF	Members of this clan all belong to the EGF superfamily. This particular superfamily is characterised as having least 6 cysteine residues. These cysteines form disulphide bonds, in the order 1-3, 2-4, 5-6, which are essential for the stability of the EGF fold. These disulphide bonds are stacked in a ladder-like arrangement. The Laminin EGF family is distinguished by having an an additional disulph…	[1]. Structure and function of epidermal growth factor-like regions in proteins. Appella E, Weber IT, Blasi F FEBS Lett 231, 1-4, (1988). PMID: 3282918	[2]. Domain structure and organisation in extracellular matrix proteins. Hohenester E, Engel J Matrix Biol 21, 115-128, (2002). PMID: 11852228									IPR000126	Active_site	Serine proteases, V8 family, serine active site				1	P18583	PF01585		A0A023I7N5	CL0425		A0A023I7H5	IPR000568
A0A023I7L8	A0A023I7L8_HUMAN	ATP6	2	A0A023I7H5		A0A023I7N5	ND1	NADH-ubiquinone oxidoreductase chain 1, 7.1.1.2	2		PF00002	Family	7tm_2	7 transmembrane receptor (Secretin family)	CL0192		CL0003	SAM	SAM domains are found in a diverse set of proteins, which include scaffolding proteins, transcription regulators, translational regulators tyrosine kinases and serine/threonine kinases [1-3]. SAM domains are found in all eukaryotes and some bacteria [3] . Structures of SAM domains reveal a common five helical structure. The SAM domain is involved in a variety of functions. The most widespread fun…	[1]. SAM: a novel motif in yeast sterile and Drosophila polyhomeotic proteins. Ponting CP Protein Sci 4, 1928-1930, (1995). PMID: 8528090	[2]. SAM as a protein interaction domain involved in developmental regulation. Schultz J, Ponting CP, Hofmann K, Bork P Protein Sci 6, 249-253, (1997). PMID: 9007998	[3]. SAM domains: uniform structure, diversity of function. Kim CA, Bowie JU Trends Biochem Sci 28, 625-628, (2003). PMID: 14659692								IPR000138	Active_site	Hydroxymethylglutaryl-CoA lyase, active site				1	P18583	PF14709		A0A023I8C2	CL0714		A0A023I7H5	IPR023011
A0A023I7N7	A0A023I7N7_HUMAN	ATP6	2	A0A023I7H5		A0A023I8C2	COX1	Cytochrome c oxidase subunit 1, 7.1.1.9	3		PF00003	Domain	7tm_3	7 transmembrane sweet-taste receptor of 3 GCPR	CL0192		CL0004	Concanavalin	This superfamily includes a diverse range of carbohydrate binding domains and glycosyl hydrolase enzymes that share a common structure.											IPR000169	Active_site	Cysteine peptidase, cysteine active site				1	P18583	PF17069		A0A023QXN0	CL0255		A0A023I7H5	IPR035908
A0A023I7V4	A0A023I7V4_HUMAN	ATP6	2	A0A023I7H5		A0A023Q4K2	COX3	Cytochrome c oxidase subunit 3	2		PF00004	Domain	AAA	ATPase family associated with various cellular activities (AAA)	CL0023		CL0005	Kazal	Kazal domains are found in both serine protease inhibitors and extracellular regions of agrins. The structure of the Kazal domain is a small alpha/beta fold. Typically the Kazal domain consists of 2 short-helices and a 3-stranded anti-parallel sheet. The fold is contains several disulphide bonds.	[1]. Protein inhibitors of proteinases. Laskowski M Jr, Kato I Annu Rev Biochem 49, 593-626, (1980). PMID: 6996568										IPR000180	Active_site	Membrane dipeptidase, active site				0	A0A023I7H5	PF00119		A0A023T787	CL0221		A0A023I7H5	IPR045083
A0A023I889	A0A023I889_HUMAN	ATP6	2	A0A023I7H5		A0A023QXN0	ATP8	ATP synthase protein 8	2		PF00005	Domain	ABC_tran	ABC transporter	CL0023		CL0006	C1	The members of this clan are all variations of the protein kinase C1 domain that is characterised by a rich cysteine and histidine content. The C1 domain is the N-terminal region of conservation found in protein kinase C domains. This domain is involved in binding many ligands, which include diacylglycerol, phorbol esters and zinc [1].	[1]. The protein kinase C family. Azzi A, Boscoboinik D, Hensey C Eur J Biochem 208, 547-557, (1992). PMID: 1396661										IPR000189	Active_site	Prokaryotic transglycosylase, active site				0	A0A023I7N5	PF00146		A0A024QYU1	CL0384		A0A023I7N5	IPR001694
A0A023I8F1	A0A023I8F1_HUMAN	ATP6	2	A0A023I7H5		A0A023T6R1	FLJ10292	Mago nashi protein, Mago-nashi homolog, isoform CRA_c	1		PF00006	Domain	ATP-synt_ab	ATP synthase alpha/beta family, nucleotide-binding domain	CL0023		CL0007	KH	The KH domain is thought to be the second most prevalent RNA binding motif in proteins. The motif is characterised by a conserved GXXXGXXG in the middle of the domain. Structures of KH reveal that the KH domain is arranged as either a beta-alpha-alpha-beta-beta (mini-KH domain) or beta-alpha-alpha-beta-beta-alpha (maxi-KH domain). The secondary elements are separated by at least four loop segment…											IPR000590	Active_site	Hydroxymethylglutaryl-coenzyme A synthase, active site				0	A0A023I8C2	PF00115		A0A024QYU9	CL0020		A0A023I7N5	IPR018086
A0A023I8F6	A0A023I8F6_HUMAN	ATP6	2	A0A023I7H5		A0A023T787	RBM8	RNA-binding protein 8A	3		PF00007	Domain	Cys_knot	Cystine-knot domain	CL0079		CL0009	ENTH_VHS	This clan includes the related ENTH and ANTH domains as well as the VHS domain. The ENTH domain is approximately 150 residues in length and is a solenoid of alpha-helices. The various ENTH domains have various lipid specificities but the key feature that distinguishes it functionally from ANTH domains is its ability to bend membranes. It does this by folding an additional N-terminal helix on lipi…	[1]. Curvature of clathrin-coated pits driven by epsin. Ford MG, Mills IG, Peter BJ, Vallis Y, Praefcke GJ, Evans PR, McMahon HT Nature 419, 361-366, (2002). PMID: 12353027	[2]. EpsinR: an AP1/clathrin interacting protein involved in vesicle trafficking. Mills IG, Praefcke GJ, Vallis Y, Peter BJ, Olesen LE, Gallop JL, Butler PJ, Evans PR, McMahon HT J Cell Biol 160, 213-222, (2003). PMID: 12538641	[3]. Contrasting membrane interaction mechanisms of AP180 N-terminal homology (ANTH) and epsin N-terminal homology (ENTH) domains. Stahelin RV, Long F, Peter BJ, Murray D, De Camilli P, McMahon HT, Cho W J Biol Chem 278, 28993-28999, (2003). PMID: 12740367	[4]. Simultaneous binding of PtdIns(4,5)P2 and clathrin by AP180 in the nucleation of clathrin lattices on membranes. Ford MG, Pearse BM, Higgins MK, Vallis Y, Owen DJ, Gibson A, Hopkins CR, Evans PR, McMahon HT Science 291, 1051-1055, (2001). PMID: 11161218	[5]. VHS domain -- a longshoreman of vesicle lines. Lohi O, Poussu A, Mao Y, Quiocho F, Lehto VP FEBS Lett 513, 19-23, (2002). PMID: 11911875						IPR001252	Active_site	Malate dehydrogenase, active site				0	A0A023Q4K2	PF00510		A0A024QYU9	CL0123		A0A023I8C2	IPR000883
A0A023I8J4	A0A023I8J4_HUMAN	ATP6	2	A0A023I7H5		A0A024QYU1	MIR16	Membrane interacting protein of RGS16, isoform CRA_a	1		PF00008	Domain	EGF	EGF-like domain	CL0001		CL0010	SH3	Src homology-3 (SH3) domains are comprised of about 60 amino acids, performing either an assembly or regulatory role. For example, SH3 domains in the Grb2 adaptor protein are essential for protein-protein interactions and signal transduction in the p21 Ras-dependent growth factor signaling pathway. Alternatively, SH3 performs a regulatory role in the Src family of tyrosine kinases. SH3 domains bi…	[1]. The structure and function of proline recognition domains. Zarrinpar A, Bhattacharyya RP, Lim WA (). PMID: 12709533										IPR001345	Active_site	Phosphoglycerate/bisphosphoglycerate mutase, active site				0	A0A023QXN0	PF00895		A0A024QYV1	CL0015		A0A023I8C2	IPR023615
A0A023I8R5	A0A023I8R5_HUMAN	ATP6	2	A0A023I7H5		A0A024QYU9	EIF3S8	Eukaryotic translation initiation factor 3 subunit C, eIF3c, Eukaryotic translation initiation factor 3 subunit 8, eIF3 p110	3		PF00009	Domain	GTP_EFTU	Elongation factor Tu GTP binding domain	CL0023		CL0011	Ig	Members of the immunoglobulin superfamily are found in hundreds of proteins of different functions. Examples include antibodies, the giant muscle kinase titin and receptor tyrosine kinases. Immunoglobulin-like domains may be involved in protein-protein and protein-ligand interactions. The superfamily can be divided into discrete structural sets, by the presence or absence of beta-strands in the s…	[1]. The immunoglobulin superfamily--domains for cell surface recognition. Williams AF, Barclay AN Annu Rev Immunol 6, 381-405, (1988). PMID: 3289571	[2]. Many of the immunoglobulin superfamily domains in cell adhesion molecules and surface receptors belong to a new structural set which is close to that containing variable domains. Harpaz Y, Chothia C J Mol Biol 238, 528-539, (1994). PMID: 8176743									IPR001497	Active_site	Methylated-DNA-[protein]-cysteine S-methyltransferase, active site				0	A0A023T6R1	PF02792		A0A024QYV3	CL0023		A0A023I8C2	IPR023616
A0A023I8Y9	A0A023I8Y9_HUMAN	ATP6	2	A0A023I7H5		A0A024QYV0	GUSBL2	Glucuronidase, beta-like 2, isoform CRA_f	1		PF00010	Domain	HLH	Helix-loop-helix DNA-binding domain			CL0012	Histone	Members of this clan all possess a histone fold. Generally proteins in this clan are DNA binding.											IPR001555	Active_site	Phosphoribosylglycinamide formyltransferase, active site				0	A0A023T787	PF00076		A0A024QYW5	CL0167		A0A023I8C2	IPR033944
A0A023I930	A0A023I930_HUMAN	ATP6	2	A0A023I7H5		A0A024QYV1	TSCOT	Thymic stromal co-transporter, isoform CRA_a	2		PF00011	Domain	HSP20	Hsp20/alpha crystallin family	CL0190		CL0013	Beta-lactamase	This superfamily contains proteins that have a beta-lactamase fold. This includes beta-lactamases as well as Dala-Dala carboxypeptidases and glutaminases.											IPR001579	Active_site	Glycosyl hydrolases family 18 (GH18) active site				0	A0A024QYU1	PF03009		A0A024QZ15	CL0015		A0A023I8C2	IPR036927
A0A023I989	A0A023I989_HUMAN	ATP6	2	A0A023I7H5		A0A024QYV3	RABL5	RAB, member RAS oncogene family-like 5, isoform CRA_a	1		PF00012	Family	HSP70	Hsp70 protein	CL0108		CL0014	Glutaminase_I	Most members of this clan are glutaminase enzymes. This superfamily is shown to be related in [1]. The clan also contains the DJ-1/PfpI family that includes the peptidase PfpI that has a catalytic Cys-His-Glu triad that differs from the class I GAT Cys-His-Glu triad.	[1]. The synthetase domains of cobalamin biosynthesis amidotransferases cobB and cobQ belong to a new family of ATP-dependent amidoligases, related to dethiobiotin synthetase. Galperin MY, Grishin NV Proteins 41, 238-247, (2000). PMID: 10966576										IPR001586	Active_site	Beta-lactamase, class-C active site				0	A0A024QYU9	PF01399		A0A024QZ18	CL0466		A0A023Q4K2	IPR000298
A0A023Q2S3	A0A023Q2S3_HUMAN	ATP6	2	A0A023I7H5		A0A024QYV6	C7orf19	Chromosome 7 open reading frame 19, isoform CRA_a	1		PF00013	Domain	KH_1	KH domain	CL0007		CL0015	MFS	The major facilitator superfamily (MFS) is one of the two largest families of membrane transporters found on Earth [1]. It is present ubiquitously in bacteria, archaea, and eukarya and includes members that can function by solute uniport, solute/cation symport, solute/cation antiport and/or solute/solute antiport with inwardly and/or outwardly directed polarity [1]. All permeases of the MFS posse…	[1]. Major facilitator superfamily. Pao SS, Paulsen IT, Saier MH Jr Microbiol Mol Biol Rev 62, 1-34, (1998). PMID: 9529885										IPR001969	Active_site	Aspartic peptidase, active site				0	A0A024QYU9	PF05470		A0A024QZ50	CL0016		A0A023Q4K2	IPR013833
A0A023Q788	A0A023Q788_HUMAN	ATP6	2	A0A023I7H5		A0A024QYV8	CP110	CP110 protein, isoform CRA_a	1		PF00014	Domain	Kunitz_BPTI	Kunitz/Bovine pancreatic trypsin inhibitor domain			CL0016	PKinase	This superfamily includes the Serine/Threonine- and Tyrosine- protein kinases as well as related kinases that act on non-protein substrates.	[1]. Protein kinase catalytic domain sequence database: identification of conserved features of primary structure and classification of family members. Hanks SK, Quinn AM Methods Enzymol 200, 38-62, (1991). PMID: 1956325	[2]. Protein kinases 6. The eukaryotic protein kinase superfamily: kinase (catalytic) domain structure and classification. Hanks SK, Hunter T FASEB J 9, 576-596, (1995). PMID: 7768349	[3]. The protein kinases of budding yeast: six score and more. Hunter T, Plowman GD Trends Biochem Sci 22, 18-22, (1997). PMID: 9020587								IPR002071	Active_site	Thermonuclease active site				0	A0A024QYV1	PF07690		A0A024QZ87	CL0053		A0A023Q4K2	IPR024791
A0A023Q7H2	A0A023Q7H2_HUMAN	ATP6	2	A0A023I7H5		A0A024QYW1	DKFZp434N035	Uncharacterized protein	1		PF00015	Family	MCPsignal	Methyl-accepting chemotaxis protein (MCP) signalling domain			CL0018	bZIP	This family of eukaryotic transcription factors contain a basic region adjacent to a leucine zipper.	[1]. bZIP transcription factors in Arabidopsis. Jakoby M, Weisshaar B, Droge-Laser W, Vicente-Carbajosa J, Tiedemann J, Kroj T, Parcy F Trends Plant Sci 7, 106-111, (2002). PMID: 11906833	[2]. bZIP proteins of human gammaherpesviruses. Sinclair AJ J Gen Virol 84, 1941-1949, (2003). PMID: 12867624	[3]. Transcription factors 1: bZIP proteins. Hurst HC Protein Profile 2, 101-168, (1995). PMID: 7780801								IPR002137	Active_site	Beta-lactamase, class-D active site				0	A0A024QYV3	PF08477		A0A024QZ98	CL0221		A0A023Q4K2	IPR033945
A0A023Q9F0	A0A023Q9F0_HUMAN	ATP6	2	A0A023I7H5		A0A024QYW5	LMO6	LIM domain only 6, isoform CRA_a	1		PF00016	Domain	RuBisCO_large	Ribulose bisphosphate carboxylase large chain, catalytic domain			CL0020	TPR	Tetratricopeptide-like repeats are found in a numerous and diverse proteins involved in such functions as cell cycle regulation, transcriptional control, mitochondrial and peroxisomal protein transport, neurogenesis and protein folding.	[1]. Tetratrico peptide repeat interactions: to TPR or not to TPR? Lamb JR, Tugendreich S, Hieter P Trends Biochem Sci 20, 257-259, (1995). PMID: 7667876	[2]. The structure of the tetratricopeptide repeats of protein phosphatase 5: implications for TPR-mediated protein-protein interactions. Das AK, Cohen PW, Barford D EMBO J 17, 1192-1199, (1998). PMID: 9482716	[3]. Tetratricopeptide-like repeats in type-III-secretion chaperones and regulators. Pallen MJ, Francis MS, Futterer K FEMS Microbiol Lett 223, 53-60, (2003). PMID: 12799000	[4]. Structural and functional analysis of Nro1/Ett1: a protein involved in translation termination in S. cerevisiae and in O2-mediated gene control in S. pombe. Rispal D, Henri J, van Tilbeurgh H, Graille M, Seraphin B (). PMID: 21610214							IPR002168	Active_site	Lipase, GDXG, putative histidine active site				0	A0A024QYV6	PF07856		A0A024QZB2	CL0361		A0A023Q4K2	IPR035973
A0A023QD05	A0A023QD05_HUMAN	ATP6	2	A0A023I7H5		A0A024QYZ2	ECOP	EGFR-coamplified and overexpressed protein, isoform CRA_a	1		PF00017	Domain	SH2	SH2 domain	CL0541		CL0021	OB	The OB (oligonucleotide/oligosaccharide binding) was defined by Murzin [1]. The common part of the OB-fold, has a five-stranded beta-sheet coiled to form a closed beta-barrel. This barrel is capped by an alpha-helix located between the third and fourth strands [1].	[1]. OB(oligonucleotide/oligosaccharide binding)-fold: common structural and functional solution for non-homologous sequences. Murzin AG EMBO J 12, 861-867, (1993). PMID: 8458342										IPR002471	Active_site	Peptidase S9, serine active site				0	A0A024QYV8	PF16025		A0A024QZB9	CL0361		A0A023QXN0	IPR001421
A0A023QE67	A0A023QE67_HUMAN	ATP6	2	A0A023I7H5		A0A024QZ15	HCP1	Heme carrier protein 1, isoform CRA_a	2		PF00018	Domain	SH3_1	SH3 domain	CL0010		CL0022	LRR	Each Leucine Rich Repeat is composed of a beta-alpha unit. These units form elongated non-globular structures. Leucine Rich Repeats are often flanked by cysteine rich domains. This Pfam entry contains Leucine Rich Repeats not recognised by the Pfam:PF00560 model.	[1]. The leucine-rich repeat: a versatile binding motif. Kobe B, Deisenhofer J Trends Biochem Sci 19, 415-421, (1994). PMID: 7817399	[2]. Crystal structure of porcine ribonuclease inhibitor, a protein with leucine-rich repeats. Kobe B, Deisenhofer J Nature 366, 751-756, (1993). PMID: 8264799									IPR004164	Active_site	Coenzyme A transferase active site				0	A0A024QYW5	PF00412		A0A024QZC7	CL0361		A0A023QXN0	IPR039017
A0A023QEM9	A0A023QEM9_HUMAN	ATP6	2	A0A023I7H5		A0A024QZ18	FLJ21687	PDZ domain containing, X chromosome, isoform CRA_a	1		PF00019	Domain	TGF_beta	Transforming growth factor beta like domain	CL0079		CL0023	P-loop_NTPase	AAA family proteins often perform chaperone-like functions that assist in the assembly, operation, or disassembly of protein complexes [2].	[1]. A 200-amino acid ATPase module in search of a basic function. Confalonieri F, Duguet M Bioessays 17, 639-650, (1995). PMID: 7646486	[2]. AAA+: A class of chaperone-like ATPases associated with the assembly, operation, and disassembly of protein complexes. Neuwald AF, Aravind L, Spouge JL, Koonin EV Genome Res 9, 27-43, (1999). PMID: 9927482	[3]. Classification and evolution of P-loop GTPases and related ATPases. Leipe DD, Wolf YI, Koonin EV, Aravind L J Mol Biol. 317, 41-72, (2002). PMID: 11916378	[4]. STAND, a class of P-loop NTPases including animal and plant regulators of programmed cell death: multiple, complex domain architectures, unusual phyletic patterns, and evolution by horizontal gene transfer. Leipe DD, Koonin EV, Aravind L J Mol Biol. 343, 1-28, (2004). PMID: 15381417	[5]. Evolution and classification of P-loop kinases and related proteins. Leipe DD, Koonin EV, Aravind L J Mol Biol. 333, 781-815, (2003). PMID: 14568537						IPR006650	Active_site	Adenosine/AMP deaminase active site				0	A0A024QYW5	PF06297		A0A024QZC8	CL0361		A0A023T6R1	IPR004023
A0A023QEV0	A0A023QEV0_HUMAN	ATP6	2	A0A023I7H5		A0A024QZ31	LOC130074	Myelin-associated neurite-outgrowth inhibitor	1		PF00020	Domain	TNFR_c6	TNFR/NGFR cysteine-rich region	CL0607		CL0025	His_Kinase_A	This is the dimerisation and phospho-acceptor domain of a sub-family of histidine kinases. It shares sequence similarity with Pfam:PF00512 and Pfam:PF07536. It is usually found adjacent to a C-terminal ATPase domain (Pfam:PF02518). This domain is found in a wide range of Bacteria and also several Archaea. It comprises one of the fundamental units of the two-component signal transduction system [2…	[1]. The histidine protein kinase superfamily. Grebe TW, Stock JB Adv Microb Physiol 41, 139-227, (1999). PMID: 10500846	[2]. Two-component signal transduction pathways in Arabidopsis. Hwang I, Chen HC, Sheen J Plant Physiol 129, 500-515, (2002). PMID: 12068096	[3]. Plant two-component signaling systems and the role of response regulators. Lohrmann J, Harter K Plant Physiol 128, 363-369, (2002). PMID: 11842140	[4]. Fungal histidine kinases. Santos JL, Shiozaki K (). PMID: 11752677	[5]. Histidine kinases and response regulator proteins in two-component signaling systems. West AH, Stock AM Trends Biochem Sci 26, 369-376, (2001). PMID: 11406410	[6]. Two-component systems in Pseudomonas aeruginosa: why so many?. Rodrigue A, Quentin Y, Lazdunski A, Mejean V, Foglino M Trends Microbiol 8, 498-504, (2000). PMID: 11121759	[7]. Two-component signal transduction. Stock AM, Robinson VL, Goudreau PN Annu Rev Biochem 69, 183-215, (2000). PMID: 10966457				IPR008255	Active_site	Pyridine nucleotide-disulphide oxidoreductase, class-II, active site				0	A0A024QZ15	PF07690		A0A024QZD2	CL0266		A0A023T6R1	IPR036605
A0A023QFT6	A0A023QFT6_HUMAN	ATP6	2	A0A023I7H5		A0A024QZ50	FLJ25006	Protein kinase domain-containing protein	1		PF00021	Domain	UPAR_LY6	u-PAR/Ly-6 domain	CL0117		CL0026	CU_oxidase	Many of the proteins in this family contain multiple similar copies of this plastocyanin-like domain.	[1]. The blue oxidases, ascorbate oxidase, laccase and ceruloplasmin. Modelling and structural relationships. Messerschmidt A, Huber R Eur J Biochem 187, 341-352, (1990). PMID: 2404764	[2]. Refined crystal structure of ascorbate oxidase at 1.9 A resolution. Messerschmidt A, Ladenstein R, Huber R, Bolognesi M, Avigliano L, Petruzzelli R, Rossi A, Finazzi-Agro A J Mol Biol 224, 179-205, (1992). PMID: 1548698	[3]. Natural engineering principles of electron tunnelling in biological oxidation-reduction. Page CC, Moser CC, Chen X, Dutton PL Nature 402, 47-52, (1999). PMID: 10573417	[4]. X-ray absorption studies and homology modeling define the structural features that specify the nature of the copper site in rusticyanin. Grossmann JG, Ingledew WJ, Harvey I, Strange RW, Hasnain SS Biochemistry 34, 8406-8414, (1995). PMID: 7599131							IPR008259	Active_site	FMN-dependent alpha-hydroxy acid dehydrogenase, active site				0	A0A024QZ18	PF00595		A0A024QZD2	CL0541		A0A023T787	IPR000504
A0A023QGP6	A0A023QGP6_HUMAN	ATP6	2	A0A023I7H5		A0A024QZ60	C17orf63	Chromosome 17 open reading frame 63, isoform CRA_a	1		PF00022	Family	Actin	Actin	CL0108		CL0027	RdRP	This clan represents the replicative RNA dependent RNA polymerase. from a variety of RNA viruses [1].	[1]. The phylogeny of RNA-dependent RNA polymerases of positive-strand RNA viruses. Koonin EV J Gen Virol 72, 2197-2206, (1991). PMID: 1895057										IPR008261	Active_site	Iodothyronine deiodinase, active site				0	A0A024QZ31	PF14944		A0A024QZD5	CL0221		A0A023T787	IPR008111
A0A023QHY5	A0A023QHY5_HUMAN	ATP6	2	A0A023I7H5		A0A024QZ75	THRAP1	Mediator of RNA polymerase II transcription subunit 13	3		PF00023	Repeat	Ank	Ankyrin repeat	CL0465		CL0028	AB_hydrolase	This catalytic domain is found in a very wide range of enzymes.	[1]. The alpha/beta hydrolase fold Ollis DL, Cheah E, Cygler M, Dijkstra B, Frolow F, Franken SM, Harel M, Remington SJ, Silman I, Schrag J, Sussman JL, Verschueren KHG, Goldman A Protein Eng 5, 197-211, (1992). PMID: 1409539										IPR008263	Active_site	Glycoside hydrolase, family 16, active site				0	A0A024QZ50	PF00069		A0A024QZE4	CL0079		A0A023T787	IPR012677
A0A023QLJ8	A0A023QLJ8_HUMAN	ATP6	2	A0A023I7H5		A0A024QZ87	MGC34647	Interleukin-34	2		PF00024	Domain	PAN_1	PAN domain	CL0168		CL0029	Cupin	This clan represents the conserved barrel domain of the 'cupin' superfamily [1] ('cupa' is the Latin term for a small barrel). The cupin fold is found in a wide variety of enzymes, but notably contains the non-enzymatic seed storage proteins also.	[1]. Cupins: a new superfamily of functionally diverse proteins that include germins and plant storage proteins. Dunwell JM Biotechnol Genet Eng Rev 15, 1-32, (1998). PMID: 9573603										IPR008265	Active_site	Lipase, GDSL, active site				0	A0A024QZ60	PF15258		A0A024QZE6	CL0015		A0A023T787	IPR033744
A0A023QMV4	A0A023QMV4_HUMAN	ATP6	2	A0A023I7H5		A0A024QZ98	RP11-78J21.1	Heterogeneous nuclear ribonucleoprotein A1-like, isoform CRA_b	1		PF00025	Domain	Arf	ADP-ribosylation factor family	CL0023		CL0030	Ion_channel	This superfamily contains a diverse range of ion channels that share a pair of transmembrane helices in common. This clan is classified as the VIC (Voltage-gated Ion Channel) superfamily in TCDB.											IPR008266	Active_site	Tyrosine-protein kinase, active site				0	A0A024QZ75	PF06333		A0A024QZE9	CL0190		A0A023T787	IPR035979
A0A023QR14	A0A023QR14_HUMAN	ATP6	2	A0A023I7H5		A0A024QZ99	MGC3020	Up-regulated in lung cancer 3	1		PF00026	Family	Asp	Eukaryotic aspartyl protease	CL0129		CL0031	Phosphatase	This family includes tyrosine and dual specificity phosphatase enzymes.	[1]. The structure and mechanism of protein phosphatases: insights into catalysis and regulation. Barford D, Das AK, Egloff MP Annu Rev Biophys Biomol Struct 27, 133-164, (1998). PMID: 9646865										IPR008268	Active_site	Peptidase S16, active site				0	A0A024QZ75	PF18296		A0A024QZF7	CL0431		A0A024QYU1	IPR017946
A0A023QTT5	A0A023QTT5_HUMAN	ATP6	2	A0A023I7H5		A0A024QZA7	MGC13024	Protein orai-3	2		PF00027	Domain	cNMP_binding	Cyclic nucleotide-binding domain	CL0029		CL0032	Dim_A_B_barrel	This superfamily of proteins possess a Ferredoxin-like fold. Pairs of these assemble into a beta barrel. The function of this barrel is quite varied and includes Muconolactone isomerase as well as monooxygenases.											IPR008270	Active_site	Glycosyl hydrolases family 25, active site				0	A0A024QZ87	PF15036		A0A024QZJ5	CL0196		A0A024QYU1	IPR030395
A0A023QW19	A0A023QW19_HUMAN	ATP6	2	A0A023I7H5		A0A024QZB2	MGC13138	Zinc finger protein 764	1		PF00028	Domain	Cadherin	Cadherin domain	CL0159		CL0033	POZ	The POZ domain is found in a variety of transcription factors. POZ domains are also found in the tetramerisation domain of voltage gated K+ channels. In general these domains mediate homo-oligomerisation.	[1]. The BTB domain, found primarily in zinc finger proteins, defines an evolutionarily conserved family that includes several developmentally regulated genes in Drosophila. Zollman S, Godt D, Prive GG, Couderc JL, Laski FA Proc Natl Acad Sci U S A 91, 10717-10721, (1994). PMID: 7938017	[2]. The POZ domain: a conserved protein-protein interaction motif. Bardwell VJ, Treisman R Genes Dev 8, 1664-1677, (1994). PMID: 7958847									IPR008271	Active_site	Serine/threonine-protein kinase, active site				0	A0A024QZ98	PF00076		A0A024QZJ5	CL0221		A0A024QYU9	IPR000717
A0A023QYE6	A0A023QYE6_HUMAN	ATP6	2	A0A023I7H5		A0A024QZB5	MGC3121	Tantalus-like domain-containing protein	1		PF00029	Domain	Connexin	Connexin	CL0375		CL0034	Amidohydrolase	This family includes a large family of metal dependent amidohydrolase enzymes [1].	[1]. An evolutionary treasure: unification of a broad set of amidohydrolases related to urease. Holm L, Sander C Proteins 28, 72-82, (1997). PMID: 9144792										IPR008272	Active_site	4-hydroxybenzoyl-CoA thioesterase, active site				0	A0A024QZ98	PF11627		A0A024QZJ8	CL0016		A0A024QYU9	IPR008905
A0A023QZN9	A0A023QZN9_HUMAN	ATP6	2	A0A023I7H5		A0A024QZB9	ZNF553	Zinc finger protein 553, isoform CRA_a	1		PF00030	Domain	Crystall	Beta/Gamma crystallin	CL0333		CL0035	Peptidase_MH	This clan contains peptidases belonging to MEROPS clan MH, MC and MF. We also include Nicastrin that is part of the gamma secretase complex and not known to be a peptidase.											IPR011767	Active_site	Glutaredoxin active site				0	A0A024QZA7	PF07856		A0A024QZK5	CL0288		A0A024QYU9	IPR027516
A0A023R5M9	A0A023R5M9_HUMAN	ATP6	2	A0A023I7H5		A0A024QZC4	P8	p8 protein (Candidate of metastasis 1), isoform CRA_a	3		PF00031	Domain	Cystatin	Cystatin domain	CL0121		CL0036	TIM_barrel	This large superfamily of TIM barrel enzymes all contain a common phosphate binding site. The phosphate is found in a variety of cofactors and ligands such as FMN [1,2].	[1]. Homology among (betaalpha)(8) barrels: implications for the evolution of metabolic pathways. Copley RR, Bork P J Mol Biol 303, 627-641, (2000). PMID: 11054297	[2]. Divergent evolution of a beta/alpha-barrel subclass: detection of numerous phosphate-binding sites by motif search. Bork P, Gellerich J, Groth H, Hooft R, Martin F Protein Sci 4, 268-274, (1995). PMID: 7757015									IPR012999	Active_site	Pyridine nucleotide-disulphide oxidoreductase, class I, active site				0	A0A024QZB2	PF00096		A0A024QZK8	CL0221		A0A024QYU9	IPR036388
A0A059QB80	A0A059QB80_HUMAN	ATP6	2	A0A023I7H5		A0A024QZC5	FBS1	Fibrosin 1, isoform CRA_a	1		PF00032	Domain	Cytochrom_B_C	Cytochrome b(C-terminal)/b6/petD			CL0037	Lysozyme	Barley chitinase, bacterial chitosanase, and lysozymes from phage and animals all hydrolyse related polysaccharides. The proteins little amino-acid similarity, but have a structurally invariant core consisting of two helices and a three-stranded beta-sheet which form the substrate-binding and catalytic cleft [1].	[1]. Chitinases, chitosanases, and lysozymes can be divided into procaryotic and eucaryotic families sharing a conserved core. Monzingo AF, Marcotte EM, Hart PJ, Robertus JD Nat Struct Biol 3, 133-140, (1996). PMID: 8564539										IPR013808	Active_site	Transglutaminase, active site				0	A0A024QZB2	PF01352		A0A024QZM5	CL0031		A0A024QYU9	IPR036390
A0A059QGJ9	A0A059QGJ9_HUMAN	ATP6	2	A0A023I7H5		A0A024QZC7	FLJ32130	Zinc finger protein 785	1		PF00033	Domain	Cytochrome_B	Cytochrome b/b6/petB	CL0328		CL0039	HUP	The HUP class contains the HIGH-signature proteins, UspA superfamily and the PP-ATPase superfamily [1]. The HIGH superfamily has the HIGH Nucleotidyl transferases and the class I tRNA synthetases both of which have the HIGH and the KMSKS motif [1],[2]. The PP-loop ATPase named after the ATP PyroPhosphatase domain, was initially identified as a conserved amino acid sequence motif in four distinct …	[1]. Monophyly of class I aminoacyl tRNA synthetase, USPA, ETFP, photolyase, and PP-ATPase nucleotide-binding domains: implications for protein evolution in the RNA. Aravind L, Anantharaman V, Koonin EV Proteins 48, 1-14, (2002). PMID: 12012333	[2]. Evolution of aminoacyl-tRNA synthetases--analysis of unique domain architectures and phylogenetic trees reveals a complex history of horizontal gene transfer events. Wolf YI, Aravind L, Grishin NV, Koonin EV Genome Res 9, 689-710, (1999). PMID: 10447505	[3]. A P-loop-like motif in a widespread ATP pyrophosphatase domain: implications for the evolution of sequence motifs and enzyme activity. Bork P, Koonin EV Proteins 20, 347-355, (1994). PMID: 7731953								IPR016129	Active_site	Peptidase family C14A, His active site				0	A0A024QZB5	PF15386		A0A024QZN6	CL0020		A0A024QYV1	IPR001958
A0A059QIY9	A0A059QIY9_HUMAN	ATP6	2	A0A023I7H5		A0A024QZC8	FLJ23436	C2H2-type domain-containing protein	2		PF00034	Domain	Cytochrom_C	Cytochrome c	CL0318		CL0040	tRNA_synt_II	Aminoacyl-tRNA synthetases are key components of the protein translation machinery that catalyse two basic reactions. First, the activation of amino acids via the formation of aminoacyl adenylates and second, linking the activated amino acid to the cognate tRNAs. The aminoacyl-tRNA synthetases generate AMP as the second end product of this reaction, which differentiates them from the majority of …	[1]. Evolution of aminoacyl-tRNA synthetases--analysis of unique domain architectures and phylogenetic trees reveals a complex history of horizontal gene transfer events. Wolf YI, Aravind L, Grishin NV, Koonin EV Genome Res 9, 689-710, (1999). PMID: 10447505										IPR016130	Active_site	Protein-tyrosine phosphatase, active site				0	A0A024QZB9	PF00096		A0A024QZN6	CL0229		A0A024QYV1	IPR011701
A0A059QJ47	A0A059QJ47_HUMAN	ATP6	2	A0A023I7H5		A0A024QZD2	SH2B	SH2-B homolog, isoform CRA_c	2		PF00035	Domain	dsrm	Double-stranded RNA binding motif	CL0196		CL0041	Death	The death domain superfamily is composed of three families: the death domain (DD); the death effector domain (DED) and the caspase recruitment domain (CARD). All of the members perform a pivotal role in signalling events that regulate apoptosis. Protein-protein interactions are mediated by self-self associations, in which CARD-CARD, DD-DD and DED-DED contacts are formed exclusively The three fami…	[1]. The death domain superfamily: a tale of two interfaces?. Weber CH, Vincenz C Trends Biochem Sci 26, 475-481, (2001). PMID: 11504623										IPR017440	Active_site	ATP-citrate lyase/succinyl-CoA ligase, active site				0	A0A024QZC4	PF10195		A0A024QZP0	CL0317		A0A024QYV1	IPR036259
A0A059QLQ9	A0A059QLQ9_HUMAN	ATP6	2	A0A023I7H5		A0A024QZD5	SNRP70	U1 small nuclear ribonucleoprotein 70 kDa	2		PF00036	Domain	EF-hand_1	EF hand	CL0220		CL0042	Flavoprotein	Members of this clan are FMN or FAD-binding redox proteins. Flavoproteins act in various electron-transport systems as functional analogues of ferredoxin. They are characterised by an open twisted alpha/beta structure consisting of five parallel beta-sheets connected by alpha-helices which surround the sheet.											IPR017950	Active_site	Urease active site				0	A0A024QZC5	PF15336		A0A024QZP0	CL0511		A0A024QYV3	IPR027417
A0A059QLY9	A0A059QLY9_HUMAN	ATP6	2	A0A023I7H5		A0A024QZE4	NTF5	Neurotrophin 5 (Neurotrophin 4/5), isoform CRA_a	2		PF00037	Domain	Fer4	4Fe-4S binding domain	CL0344		CL0043	Chelatase	Metallated tetrapyrroles are used as prosthetic groups in proteins involved in biologically important processes such as photosynthesis, oxygen transport, drug metabolism and nitric oxide synthesis. In living organisms, metallation is catalysed by a group of enzymes called chelatases. This clan contains ferrochelatase (heme) and cobalt chelatase [1].	[1]. Metal binding to Bacillus subtilis ferrochelatase and interaction between metal sites. Lecerof D, Fodje MN, Alvarez Leon R, Olsson U, Hansson A, Sigfridsson E, Ryde U, Hansson M, Al-Karadaghi S J Biol Inorg Chem 8, 452-458, (2003). PMID: 12761666										IPR018040	Active_site	Pectinesterase, Tyr active site				0	A0A024QZC7	PF00096		A0A024QZP6	CL0012		A0A024QYV6	IPR012446
A0A059QPL3	A0A059QPL3_HUMAN	ATP6	2	A0A023I7H5		A0A024QZE6	C16orf58	Chromosome 16 open reading frame 58, isoform CRA_a	1		PF00038	Coiled-coil	Filament	Intermediate filament protein			CL0044	Ferritin	The members of this clan all share a distinctive four helical bundle. The four helices are arranged antiparallel with a left-handed twist. This helical bundle is distinguished from others by the long connection between the second and third helices. Some of the members contain a Fe or Mn dimer at the centre of the helical bundle. The ferritin fold was first described by Murzin AG and Chothia C, Cu…											IPR018053	Active_site	Glycoside hydrolase, family 32, active site				0	A0A024QZC7	PF01352		A0A024QZP6	CL0223		A0A024QYV6	IPR038350
A0A059QQB7	A0A059QQB7_HUMAN	ATP6	2	A0A023I7H5		A0A024QZE9	FLJ20643	PIH1 domain-containing protein 1	1		PF00039	Domain	fn1	Fibronectin type I domain	CL0451		CL0045	Rubredoxin	The Rubredoxin clan is comprised of three families:Rubredoxin, COX5B and desulforedoxin.Rubredoxin domains are small domains (5-6 kDa) and bind one iron atom tetrahedrally bound by four cysteine residues.Similar, desulforedoxin domains are small (4 kDa), but usually form homodimers. Each monomer binds one iron atom, but in a distorted tetrahedral arrangement. COX5B domains are membrane-anchored r…											IPR018057	Active_site	Deoxyribonuclease I, active site				0	A0A024QZC8	PF00096		A0A024QZQ1	CL0085		A0A024QYV8	IPR033207
A0A059QQM1	A0A059QQM1_HUMAN	ATP6	2	A0A023I7H5		A0A024QZF7	FLJ22688	Protein fuzzy homolog	1		PF00040	Domain	fn2	Fibronectin type II domain	CL0602		CL0046	Thiolase	Thiolases are ubiquitous and form a large superfamily. Thiolases can function either degradatively, in the beta-oxidation pathway of fatty acids, or biosynthetically. Biosynthetic thiolases catalyse the formation of acetoacetyl-CoA from two molecules of acetyl-CoA . This is one of the fundamental categories of carbon skeletal assembly patterns in biological systems and is the first step in a wide…	[1]. A biosynthetic thiolase in complex with a reaction intermediate: the crystal structure provides new insights into the catalytic mechanism. Modis Y, Wierenga RK Structure Fold Des 7, 1279-1290, (1999). PMID: 10545327										IPR018085	Active_site	Uracil-DNA glycosylase, active site				0	A0A024QZC8	PF05001		A0A024QZR9	CL0062		A0A024QYW5	IPR001781
A0A059QQT5	A0A059QQT5_HUMAN	ATP6	2	A0A023I7H5		A0A024QZG5	MGC2474	KRAB domain-containing protein	1		PF00041	Domain	fn3	Fibronectin type III domain	CL0159		CL0047	CuAO_N2_N3	Copper amine oxidase (CuAO) are comprised of three of four domains. In the case of the four domain CuAO, the N-terminal domain (termed N1, and is not present in the three domain CuAO) and the C-terminal catalytic domain sandwich two repeated domains (termed N2 and N3). The function of these two homologous domains is uncertain. N2 and N3 both have a cystatin-like fold [1].	[1]. Visualization of dioxygen bound to copper during enzyme catalysis. Wilmot CM, Hajdu J, McPherson MJ, Knowles PF, Phillips SE Science 286, 1724-1728, (1999). PMID: 10576737										IPR018088	Active_site	Chalcone/stilbene synthase, active site				0	A0A024QZD2	PF00017		A0A024QZS3	CL0525		A0A024QYW5	IPR010442
A0A059QQZ9	A0A059QQZ9_HUMAN	ATP6	2	A0A023I7H5		A0A024QZH6	SR-A1	Serine arginine-rich pre-mRNA splicing factor SR-A1, isoform CRA_a	1		PF00042	Domain	Globin	Globin	CL0090		CL0048	LolA_LolB	Gram-negative bacteria lipoproteins are anchored to the periplasmic surface of the inner or outer membrane depending on the sorting signal, which is the residue at position 2 of the polypeptide. Five Lol proteins are involved in the sorting and membrane localisation of lipoprotein. An ATP-binding cassette (ABC) transporter, LolCDE, releases outer membrane-specific lipoproteins from the inner memb…	[1]. Crystal structures of bacterial lipoprotein localization factors, LolA and LolB. Takeda K, Miyatake H, Yokota N, Matsuyama S, Tokuda H, Miki K EMBO J 22, 3199-3209, (2003). PMID: 12839983	[2]. Sorting of lipoproteins to the outer membrane in E. coli. Tokuda H, Matsuyama S Biochim Biophys Acta 1693, 5-13, (2004). PMID: 15276320									IPR018089	Active_site	Orotidine 5'-phosphate decarboxylase, active site				0	A0A024QZD2	PF00169		A0A024QZU5	CL0127		A0A024QYW5	IPR033723
A0A059QR26	A0A059QR26_HUMAN	ATP6	2	A0A023I7H5		A0A024QZI8	C16orf45	Chromosome 16 open reading frame 45, isoform CRA_a	1		PF00043	Domain	GST_C	Glutathione S-transferase, C-terminal domain	CL0497		CL0049	Tudor	This clan covers the Tudor domain 'royal family' [1]. This includes chromo, MBT, PWWP and tudor domains. The chromo domain is a comprised of approximately 50 amino acid residues. There are usually one to three Chromo domains found in a single protein. In some chromo domain containing proteins, a second related chromo domain has been found and is referred to as the Chromo-shadow domain. The struct…	[1]. The Tudor domain 'Royal Family': Tudor, plant Agenet, Chromo, PWWP and MBT domains. Maurer-Stroh S, Dickens NJ, Hughes-Davies L, Kouzarides T, Eisenhaber F, Ponting CP Trends Biochem Sci 28, 69-74, (2003). PMID: 12575993	[2]. Molecular biology of the chromo domain: an ancient chromatin module comes of age. Eissenberg JC Gene 275, 19-29, (2001). PMID: 11574148									IPR018114	Active_site	Serine proteases, trypsin family, histidine active site				0	A0A024QZD2	PF08916		A0A024QZU5	CL0632		A0A024QYW5	IPR033725
A0A059QR71	A0A059QR71_HUMAN	ATP6	2	A0A023I7H5		A0A024QZJ5	ACF	Apobec-1 complementation factor, isoform CRA_b	2		PF00044	Domain	Gp_dh_N	Glyceraldehyde 3-phosphate dehydrogenase, NAD binding domain	CL0063		CL0050	HotDog	The HotDog fold was first observed in the structure of Escherichia coli beta-hydroxydecanoyl thiol ester dehydratase (FabA), where Leesong et al. noticed that each subunit of this dimeric enzyme contained a mixed alpha + beta 'hot dog' fold. They described the seven-stranded antiparallel beta-sheet as the 'bun', which wraps around a five-turn alpha-helical 'sausage', This superfamily contains a d…	[1]. The Hotdog fold: wrapping up a superfamily of thioesterases and dehydratases. Dillon SC, Bateman A BMC Bioinformatics 5, 109-109, (2004). PMID: 15307895										IPR018117	Active_site	DNA methylase, C-5 cytosine-specific, active site				0	A0A024QZD5	PF00076		A0A024QZX9	CL0028		A0A024QYW5	IPR033726
A0A059QSI6	A0A059QSI6_HUMAN	ATP6	2	A0A023I7H5		A0A024QZJ8	CDC2	Cell division cycle 2, G1 to S and G2 to M, isoform CRA_c	2		PF00045	Repeat	Hemopexin	Hemopexin			CL0051	NTF2	This superfamily contains a variety of enzymes such as Scytalone dehydratase, Delta-5-3-ketosteroid isomerase, Limonene-1,2-epoxide hydrolase among others. The family also includes presumed non-enzymatic homologues such as NTF2.	[1]. Identification of protein fold and catalytic residues of gamma-hexachlorocyclohexane dehydrochlorinase LinA. Nagata Y, Mori K, Takagi M, Murzin AG, Damborsky J Proteins 45, 471-477, (2001). PMID: 11746694										IPR018120	Active_site	Glycoside hydrolase family 1, active site				0	A0A024QZD5	PF12220		A0A024QZY1	CL0172		A0A024QYW5	IPR033727
A0A059QWC2	A0A059QWC2_HUMAN	ATP6	2	A0A023I7H5		A0A024QZK1	C10orf107	Chromosome 10 open reading frame 107, isoform CRA_a	1		PF00046	Domain	Homeodomain	Homeodomain	CL0123		CL0052	NTN	In the N-terminal nucleophile aminohydrolases (Ntn hydrolases) the N-terminal residue provides two catalytic groups, nucleophile and proton donor. These enzymes use the side chain of the amino-terminal residue, incorporated in a beta-sheet, as the nucleophile in the catalytic attack at the carbonyl carbon. The nucleophile is cysteine in GAT, serine in penicillin acylase, and threonine in the prot…	[1]. A protein catalytic framework with an N-terminal nucleophile is capable of self-activation. Brannigan JA, Dodson G, Duggleby HJ, Moody PC, Smith JL, Tomchick DR, Murzin AG Nature 378, 416-419, (1995). PMID: 7477383	[2]. Detecting distant homology with Meta-BASIC. Ginalski K, von Grotthuss M, Grishin NV, Rychlewski L Nucleic Acids Res. 32, 576-581, (2004). PMID: 15215454	[3]. Peptidase family U34 belongs to the superfamily of N-terminal nucleophile hydrolases. Pei J, Grishin NV Protein Sci 12, 1131-1135, (2003). PMID: 12717035								IPR018129	Active_site	Phosphoenolpyruvate carboxylase, Lys active site				0	A0A024QZE4	PF00243		A0A024QZY1	CL0497		A0A024QYW5	IPR047120
A0A059RGC7	A0A059RGC7_HUMAN	ATP6	2	A0A023I7H5		A0A024QZK5	MAWBP	Epididymis secretory protein Li 306, Epididymis secretory sperm binding protein, MAWD binding protein, isoform CRA_b	1		PF00047	Domain	ig	Immunoglobulin domain	CL0011		CL0053	4H_Cytokine	Cytokines are regulatory peptides that can be produced by various cells for communicating and orchestrating the large multicellular system. Cytokines are key mediators of hematopoiesis, immunity, allergy, inflammation, tissue remodeling, angiogenesis, and embryonic development [2]. This superfamily includes both the long and short chain helical cytokines.	[1]. Sequence conservation in families whose members have little or no sequence similarity: the four-helical cytokines and cytochromes. Hill EE, Morea V, Chothia C J Mol Biol 322, 205-233, (2002). PMID: 12215425	[2]. Phylogeny of a growth hormone-like cytokine superfamily based upon 3D structure. Ouyang S, He F J Mol Evol 56, 131-136, (2003). PMID: 12574859									IPR018148	Active_site	Methylglyoxal synthase, active site				0	A0A024QZE6	PF04884		A0A024QZZ4	CL0361		A0A024QZ15	IPR005829
A0A059RHL4	A0A059RHL4_HUMAN	ATP6	2	A0A023I7H5		A0A024QZK8	HNRPH3	Heterogeneous nuclear ribonucleoprotein H3 (2H9), isoform CRA_a	1		PF00048	Domain	IL8	Small cytokines (intecrine/chemokine), interleukin-8 like			CL0054	Knottin_1	This clan includes a number of toxin families that share the knottin structure. These families come from scorpions, plants and arthropods.											IPR018177	Active_site	L-lactate dehydrogenase, active site				0	A0A024QZE9	PF08190		A0A024QZZ7	CL0012		A0A024QZ15	IPR011701
A0A059RHU8	A0A059RHU8_HUMAN	ATP6	2	A0A023I7H5		A0A024QZK9	KIAA1641	KIAA1641, isoform CRA_c	1		PF00049	Domain	Insulin	Insulin/IGF/Relaxin family	CL0239		CL0055	Nucleoplasmin	This large superfamily includes nucleoplasmin as well as a wide range of viral coat and capsid proteins that share a jelly roll topology.											IPR018187	Active_site	Asp/Glu racemase, active site 1				0	A0A024QZE9	PF18201		A0A024R017	CL0012		A0A024QZ15	IPR020846
A0A059RIN6	A0A059RIN6_HUMAN	ATP6	2	A0A023I7H5		A0A024QZL0	C10orf35	Chromosome 10 open reading frame 35, isoform CRA_a	1		PF00050	Domain	Kazal_1	Kazal-type serine protease inhibitor domain	CL0005		CL0056	C_Lectin	This clan contains domains that have a C-type lectin fold. Many of these are known or expected to mediate interactions with sugars.											IPR018188	Active_site	Ribonuclease T2, His active site 1				0	A0A024QZF7	PF19036		A0A024R032	CL0010		A0A024QZ15	IPR036259
A0A059RIS0	A0A059RIS0_HUMAN	ATP6	2	A0A023I7H5		A0A024QZL1	PRG1	Proteoglycan 1, secretory granule, isoform CRA_a	1		PF00051	Domain	Kringle	Kringle domain	CL0602		CL0057	Met_repress	This superfamily contains many antitoxin families, all of which carry a ribbon-helix-helix DNA-binding motif with the beta-ribbon located in and recognising the major groove of operator DNA [1].	[1]. Crystal structure of omega transcriptional repressor encoded by Streptococcus pyogenes plasmid pSM19035 at 1.5 A resolution. Murayama K, Orth P, de la Hoz AB, Alonso JC, Saenger W J Mol Biol 314, 789-796, (2001). PMID: 11733997	[2]. Bacterial persistence and toxin-antitoxin Loci. Gerdes K, Maisonneuve E Annu Rev Microbiol. 66, 103-123, (2012). PMID: 22994490									IPR018201	Active_site	Beta-ketoacyl synthase, active site				0	A0A024QZF7	PF19037		A0A024R049	CL0016		A0A024QZ18	IPR001478
A0A059RJ29	A0A059RJ29_HUMAN	ATP6	2	A0A023I7H5		A0A024QZM5	KIAA1274	KIAA1274, isoform CRA_a	1		PF00052	Domain	Laminin_B	Laminin B (Domain IV)	CL0202		CL0058	Glyco_hydro_tim	This large superfamily contains a range of glycosyl hydrolase enzymes that possess a TIM barrel fold. This CLAN merges clans GH-A, GH-D, GH-H and GH-K from CAZy.	[1]. [New program PSI protein classifier automatizes the PSI-BLAST results analysis]. Naumov DG, Karreras M Mol Biol (Mosk). 43, 709-721, (2009). PMID: 19807035										IPR018202	Active_site	Serine carboxypeptidase, serine active site				0	A0A024QZF7	PF19038		A0A024R054	CL0172		A0A024QZ18	IPR030031
A0A059RKH8	A0A059RKH8_HUMAN	ATP6	2	A0A023I7H5		A0A024QZN6	RAI17	Retinoic acid induced 17, isoform CRA_a	1		PF00053	Domain	Laminin_EGF	Laminin EGF domain	CL0001		CL0059	6_Hairpin	This Clan includes CAZy clans GH-L, GH-M and GH-G. The members of this clan share a common structure composed of 6 helical hairpins. Most members of this superfamily are glycosyl hydrolase enzymes.											IPR018204	Active_site	Tryptophan synthase, alpha chain, active site				0	A0A024QZG5	PF01352		A0A024R061	CL0431		A0A024QZ18	IPR036034
A0A059RL82	A0A059RL82_HUMAN	ATP6	2	A0A023I7H5		A0A024QZN7	C10orf70	Chromosome 10 open reading frame 70, isoform CRA_b	2		PF00054	Domain	Laminin_G_1	Laminin G domain	CL0004		CL0060	DNA_clamp	Sliding DNA clamps are ring-shaped proteins that allow DNA polymerase to achieve high processivity during chromosome replication by tethering the polymerase catalytic subunit to DNA. All of the structures share a 12-fold symmetry around the ring consisting of a simple structural repeat, though there is structural divergence in some of the repeats. Bacterial beta-clamps contain six repeats per sub…	[1]. Evolutionary clues to DNA polymerase III beta clamp structural mechanisms. Neuwald AF Nucleic Acids Res 31, 4503-4516, (2003). PMID: 12888511	[2]. PSI-BLAST searches using hidden markov models of structural repeats: prediction of an unusual sliding DNA clamp and of beta-propellers in UV-damaged DNA-binding protein. Neuwald AF, Poleksic A Nucleic Acids Res 28, 3570-3580, (2000). PMID: 10982878									IPR018208	Active_site	Glycoside hydrolase family 11, active site 1				0	A0A024QZI8	PF12130		A0A024R061	CL0445		A0A024QZ31	IPR029247
A0A059RLI7	A0A059RLI7_HUMAN	ATP6	2	A0A023I7H5		A0A024QZP0	C10orf56	Chromosome 10 open reading frame 56, isoform CRA_a	1		PF00055	Domain	Laminin_N	Laminin N-terminal (Domain VI)	CL0202		CL0061	PLP_aminotran	This superfamily contains a variety of PLP-dependent enzymes.											IPR018209	Active_site	Pyruvate kinase, active site				0	A0A024QZJ5	PF00076		A0A024R073	CL0023		A0A024QZ50	IPR000719
A0A059RMA1	A0A059RMA1_HUMAN	ATP6	2	A0A023I7H5		A0A024QZP6	H2AFY2	Core histone macro-H2A	3		PF00056	Domain	Ldh_1_N	lactate/malate dehydrogenase, NAD binding domain	CL0063		CL0062	APC	This large superfamily contains a variety of transporters including amino acid permeases that according to TCDB belong to the APC (Amino acid-Polyamine-organoCation) superfamily.											IPR018215	Active_site	ClpP, Ser active site				0	A0A024QZJ5	PF14709		A0A024R073	CL0381		A0A024QZ50	IPR008271
A0A059RND0	A0A059RND0_HUMAN	ATP6	2	A0A023I7H5		A0A024QZP9	C10orf27	Chromosome 10 open reading frame 27, isoform CRA_a	1		PF00057	Repeat	Ldl_recept_a	Low-density lipoprotein receptor domain class A			CL0063	NADP_Rossmann	A class of redox enzymes are two domain proteins. One domain, termed the catalytic domain, confers substrate specificity and the precise reaction of the enzyme. The other domain, which is common to this class of redox enzymes, is a Rossmann-fold domain. The Rossmann domain binds nicotinamide adenine dinucleotide (NAD+) and it is this cofactor that reversibly accepts a hydride ion, which is lost o…	[1]. The geometry of domain combination in proteins. Bashton M, Chothia C J Mol Biol 315, 927-939, (2002). PMID: 11812158										IPR018221	Active_site	Glycoside hydrolase family 9, His active site				0	A0A024QZJ8	PF00069		A0A024R073	CL0398		A0A024QZ50	IPR011009
A0A059RNF3	A0A059RNF3_HUMAN	ATP6	2	A0A023I7H5		A0A024QZQ1	SIRT1	Sirtuin (Silent mating type information regulation 2 homolog) 1 (S. cerevisiae), isoform CRA_a	5		PF00058	Repeat	Ldl_recept_b	Low-density lipoprotein receptor repeat class B	CL0186		CL0064	CPA_AT	This Clan contains transporter proteins that belong to the CPA superfamily and AT superfamily according to TCDB [1].	[1]. Phylogeny as a guide to structure and function of membrane transport proteins. Chang AB, Lin R, Keith Studley W, Tran CV, Saier MH Jr Mol Membr Biol 21, 171-181, (2004). PMID: 15204625										IPR018225	Active_site	Transaldolase, active site				0	A0A024QZK1	PF14769		A0A024R0B7	CL0412		A0A024QZ60	IPR029340
A0A059RNJ2	A0A059RNJ2_HUMAN	ATP6	2	A0A023I7H5		A0A024QZR9	FLJ90709	Amino acid transporter transmembrane domain-containing protein	1		PF00059	Domain	Lectin_C	Lectin C-type domain	CL0056		CL0065	Cyclin	This Clan contains cyclins, Transcription factor IIB (TFIIB), and the Retinoblastoma tumour suppressor proteins. These were predicted to be related by sequence [1].	[1]. Evidence for a protein domain superfamily shared by the cyclins, TFIIB and RB/p107. Gibson TJ, Thompson JD, Blocker A, Kouzarides T Nucleic Acids Res 22, 946-952, (1994). PMID: 8152925	[2]. The cyclin box fold: protein recognition in cell-cycle and transcription control. Noble ME, Endicott JA, Brown NR, Johnson LN Trends Biochem Sci 22, 482-487, (1997). PMID: 9433129									IPR018239	Active_site	NAD-dependent DNA ligase, active site				0	A0A024QZK5	PF02567		A0A024R0G3	CL0361		A0A024QZ75	IPR009401
A0A059RP18	A0A059RP18_HUMAN	ATP6	2	A0A023I7H5		A0A024QZS2	FLJ33641	Protein GAPT	2		PF00060	Family	Lig_chan	Ligand-gated ion channel	CL0030		CL0066	Trefoil	This family corresponds to a large set of related beta-trefoil proteins [1]. The beta-trefoil is formed by six two-stranded hairpins [2]. Three of these form a barrel structure and the other three are in a triangular array that caps the barrel. The arrangement of the secondary structures gives the molecules a pseudo 3-fold axis.	[1]. Identification of distant homologues of fibroblast growth factors suggests a common ancestor for all beta-trefoil proteins. Ponting CP, Russell RB J Mol Biol 302, 1041-1047, (2000). PMID: 11183773	[2]. beta-Trefoil fold. Patterns of structure and sequence in the Kunitz inhibitors interleukins-1 beta and 1 alpha and fibroblast growth factors. Murzin AG, Lesk AM, Chothia C J Mol Biol 223, 531-543, (1992). PMID: 1738162									IPR018274	Active_site	PEP-utilising enzyme, active site				0	A0A024QZK8	PF00076		A0A024R0I4	CL0065		A0A024QZ75	IPR041285
A0A059RPS5	A0A059RPS5_HUMAN	ATP6	2	A0A023I7H5		A0A024QZS3	PPAP2A	Phosphatidic acid phosphatase type 2A, isoform CRA_a	2		PF00061	Domain	Lipocalin	Lipocalin / cytosolic fatty-acid binding protein family	CL0116		CL0067	SIS	This catalytic domain catalyses isomerisation reactions of a variety of sugars [1].	[1]. The SIS domain: a phosphosugar-binding domain. Bateman A Trends Biochem Sci 24, 94-95, (1999). PMID: 10203754										IPR018299	Active_site	Alkaline phosphatase, active site				0	A0A024QZK9	PF14915		A0A024R0J9	CL0004		A0A024QZ87	IPR020415
A0A059RPU4	A0A059RPU4_HUMAN	ATP6	2	A0A023I7H5		A0A024QZU5	PECI	Peroxisomal D3,D2-enoyl-CoA isomerase, isoform CRA_a	1		PF00062	Domain	Lys	C-type lysozyme/alpha-lactalbumin family	CL0037		CL0068	RIIa	This clan includes both the RIIa dimerisation motif as well as the Dpy-30-like motif [1].	[1]. The Saccharomyces cerevisiae Set1 complex includes an Ash2 homologue and methylates histone 3 lysine 4. Roguev A, Schaft D, Shevchenko A, Pijnappel WW, Wilm M, Aasland R, Stewart AF EMBO J 20, 7137-7148, (2001). PMID: 11742990										IPR018372	Active_site	Chloramphenicol acetyltransferase, active site				0	A0A024QZL0	PF15378		A0A024R0J9	CL0023		A0A024QZ87	IPR038328
A0A059RR79	A0A059RR79_HUMAN	ATP6	2	A0A023I7H5		A0A024QZW6	MGC40222	Uncharacterized protein	1		PF00063	Domain	Myosin_head	Myosin head (motor domain)	CL0023		CL0069	GFP	This superfamily has an unusual fold of an 11 stranded beta barrel enclosing an alpha-helix. This superfamily includes green fluorescent protein as well as a domain from nidogen.											IPR018508	Active_site	3-dehydroquinate dehydratase, active site				0	A0A024QZL1	PF04360		A0A024R0P7	CL0361		A0A024QZ98	IPR000504
A0A059RRH2	A0A059RRH2_HUMAN	ATP6	2	A0A023I7H5		A0A024QZX9	LOC221955	sn-1-specific diacylglycerol lipase, 3.1.1.116	1		PF00064	Repeat	Neur	Neuraminidase	CL0434		CL0070	ACT	These domains are involved in binding to amino-acids and causing allosteric regulation of linked enzyme domains [1]. The relationship between these two families was first noticed in [2].	[1]. Regulatory potential, phyletic distribution and evolution of ancient, intracellular small-molecule-binding domains. Anantharaman V, Koonin EV, Aravind L J Mol Biol 307, 1271-1292, (2001). PMID: 11292341	[2]. Distant homology recognition using structural classification of proteins. Murzin AG, Bateman A Proteins 1, 105-112, (1997). PMID: 9485501									IPR018510	Active_site	Diaminopimelate epimerase, active site				0	A0A024QZM5	PF14566		A0A024R0Q9	CL0016		A0A024QZ98	IPR012677
A0A059RS84	A0A059RS84_HUMAN	ATP6	2	A0A023I7H5		A0A024QZY1	JTV1	Aminoacyl tRNA synthase complex-interacting multifunctional protein 2, Multisynthase complex auxiliary component p38, Protein JTV-1	3		PF00066	Domain	Notch	LNR domain			CL0071	His_phosphatase	The histidine phosphatase superfamily is so named because catalysis centres on a conserved His residue that is transiently phosphorylated during the catalytic cycle. Other conserved residues contribute to a 'phosphate pocket' and interact with the phospho group of substrate before, during and after its transfer to the His residue. Structure and sequence analyses show that different families contr…	[1]. The histidine phosphatase superfamily: structure and function. Rigden DJ Biochem J. 409, 333-348, (2008). PMID: 18092946										IPR018521	Active_site	DNA topoisomerase I, active site				0	A0A024QZN6	PF02891		A0A024R0S9	CL0023		A0A024QZ98	IPR021662
A0A059RTC0	A0A059RTC0_HUMAN	ATP6	2	A0A023I7H5		A0A024QZY6	C6orf146	Chromosome 6 open reading frame 146, isoform CRA_a	1		PF00067	Domain	p450	Cytochrome P450			CL0072	Ubiquitin	This family includes proteins that share the ubiquitin fold. It currently unites four SCOP superfamilies.											IPR018524	Active_site	DNA/RNA non-specific endonuclease, active site				0	A0A024QZN6	PF18028		A0A024R0T1	CL0063		A0A024QZ98	IPR034845
A0A059RTL6	A0A059RTL6_HUMAN	ATP6	2	A0A023I7H5		A0A024QZY9	C6orf32	Chromosome 6 open reading frame 32, isoform CRA_c	1		PF00068	Domain	Phospholip_A2_1	Phospholipase A2	CL0629		CL0073	P53-like	This clan contains a variety of DNA-binding domains that contain an immunoglobulin-like fold. It includes the DNA-binding domains of NF-kappaB, NFAT, p53, STAT-1, the T-domain and the Runt domain [1].	[1]. The Ig fold of the core binding factor alpha Runt domain is a member of a family of structurally and functionally related Ig-fold DNA-binding domains. Berardi MJ, Sun C, Zehr M, Abildgaard F, Peng J, Speck NA, Bushweller JH Structure Fold Des 7, 1247-1256, (1999). PMID: 10545320										IPR019756	Active_site	Peptidase S26A, signal peptidase I, serine active site				0	A0A024QZN7	PF09360		A0A024R0V8	CL0172		A0A024QZ98	IPR035979
A0A059RU34	A0A059RU34_HUMAN	ATP6	2	A0A023I7H5		A0A024QZZ4	ZNF322A	Zinc finger protein 322A, isoform CRA_a	2		PF00069	Domain	Pkinase	Protein kinase domain	CL0016		CL0074	Matrix	This clan brings together matrix proteins from a variety of retroviruses.											IPR019757	Active_site	Peptidase S26A, signal peptidase I, lysine active site				0	A0A024QZN7	PF10660		A0A024R0W7	CL0167		A0A024QZA7	IPR012446
A0A059RUY3	A0A059RUY3_HUMAN	ATP6	2	A0A023I7H5		A0A024QZZ7	HIST1H2BD	Histone H2B	2		PF00070	Domain	Pyr_redox	Pyridine nucleotide-disulphide oxidoreductase	CL0063		CL0075	Defensin	This clan includes diverse defensins as well as myotoxins.											IPR019772	Active_site	Ferrochelatase, active site				0	A0A024QZP0	PF13696		A0A024R0Z2	CL0392		A0A024QZA7	IPR038350
A0A059RVW3	A0A059RVW3_HUMAN	ATP6	2	A0A023I7H5		A0A024R002	RP3-398D13.1	Uncharacterized protein	1		PF00071	Domain	Ras	Ras family	CL0023		CL0076	FAD_Lum_binding	Riboflavin nucleotide coenzymes and flavin adenine dinucleotide (FAD) are essential cofactors for a large number of flavoproteins involved in a diverse set of redox reactions. There are thought to be four different FAD-binding folds [1].The FAD-binding fold of this clan is a cylindrical beta-fold. More specifically, the domain forms a flattened six-stranded antiparallel beta-barrel organised into…	[1]. Sequence-structure analysis of FAD-containing proteins. Dym O, Eisenberg D Protein Sci 10, 1712-1728, (2001). PMID: 11514662										IPR019779	Active_site	Galactose-1-phosphate uridyl transferase, class I His-active site				0	A0A024QZP0	PF17180		A0A024R0Z5	CL0453		A0A024QZB2	IPR001909
A0A059RW04	A0A059RW04_HUMAN	ATP6	2	A0A023I7H5		A0A024R017	HIST1H2AC	Histone H2A	2		PF00072	Domain	Response_reg	Response regulator receiver domain	CL0304		CL0077	FAD_PCMH	The FAD-binding domains contained in this family fall within the PCMH (p-cresol methyl-hydroxylase) family of FAD binding proteins as defined in [1]. In this family, the structure of the FAD binding domain is comprised of two subdomains. Both of these subdomains have an alpha-beta fold. The first subdomain is comprised of three parallel beta strands, surrounded by alpha helices. The second subdom…	[1]. Sequence-structure analysis of FAD-containing proteins. Dym O, Eisenberg D Protein Sci 10, 1712-1728, (2001). PMID: 11514662										IPR019794	Active_site	Peroxidase, active site				0	A0A024QZP6	PF00125		A0A024R118	CL0063		A0A024QZB2	IPR013087
A0A059RXE0	A0A059RXE0_HUMAN	ATP6	2	A0A023I7H5		A0A024R032	FYB	FYN binding protein (FYB-120/130), isoform CRA_b	1		PF00073	Domain	Rhv	picornavirus capsid protein	CL0055		CL0078	DNA_ligase	This superfamily contains both ATP-dependent and NAD dependent DNA ligase enzymes. The family also includes mRNA capping enzymes. The members of this clan were shown to be related by sequence in [1].	[1]. Gleaning non-trivial structural, functional and evolutionary information about proteins by iterative database searches. Aravind L, Koonin EV J Mol Biol 287, 1023-1040, (1999). PMID: 10222208										IPR019796	Active_site	Glucose-6-phosphate dehydrogenase, active site				0	A0A024QZP6	PF01661		A0A024R128	CL0651		A0A024QZB2	IPR036051
A0A059S1D9	A0A059S1D9_HUMAN	ATP6	2	A0A023I7H5		A0A024R048	FLJ30596	NAD kinase 2, mitochondrial, 2.7.1.23, NAD kinase domain-containing protein 1, mitochondrial	3		PF00074	Domain	RnaseA	Pancreatic ribonuclease			CL0079	Cystine-knot	The cytokine families in this clan have the cystine-knot fold. In this 6 cysteines form three disulphide bridges that are interlinked.	[1]. The cystine-knot growth-factor superfamily. Sun PD, Davies DR Annu Rev Biophys Biomol Struct 24, 269-291, (1995). PMID: 7663117	[2]. A structural superfamily of growth factors containing a cystine knot motif. McDonald NQ, Hendrickson WA Cell 73, 421-424, (1993). PMID: 8490958									IPR019800	Active_site	Glycoside hydrolase, family 3, active site				0	A0A024QZP6	PF16211		A0A024R141	CL0125		A0A024QZB2	IPR036236
A0A059S701	A0A059S701_HUMAN	ATP6	2	A0A023I7H5		A0A024R049	MGC42105	Protein kinase domain-containing protein	1		PF00075	Domain	RNase_H	RNase H	CL0219		CL0080	Beta-tent	This clan contains TCTP, Mss4 and SelR families [1]. The common fold of members of this superfamily has been termed the beta-tent fold [2]. This fold contains two four stranded antiparallel beta sheets. These are oriented at right angles and pinned together at their tip by a zinc ion [2].	[1]. Structure of TCTP reveals unexpected relationship with guanine nucleotide-free chaperones. Thaw P, Baxter NJ, Hounslow AM, Price C, Waltho JP, Craven CJ Nat Struct Biol 8, 701-704, (2001). PMID: 11473261	[2]. The thalidomide-binding domain of cereblon defines the CULT domain family and is a new member of the beta-tent fold. Lupas AN, Zhu H, Korycinski M (). PMID: 25569776									IPR019810	Active_site	Citrate synthase active site				0	A0A024QZP9	PF15256		A0A024R154	CL0525		A0A024QZB5	IPR026320
A0A059S7N3	A0A059S7N3_HUMAN	ATP6	2	A0A023I7H5		A0A024R054	SEPP1	Selenoprotein P, plasma, 1	1		PF00076	Domain	RRM_1	RNA recognition motif. (a.k.a. RRM, RBD, or RNP domain)	CL0221		CL0081	MBD-like	This clan contains proteins with a distinctive three stranded DNA-binding domain [1].	[1]. Major groove recognition by three-stranded beta-sheets: affinity determinants and conserved structural features. Connolly KM, Ilangovan U, Wojciak JM, Iwahara M, Clubb RT J Mol Biol 300, 841-856, (2000). PMID: 10891272										IPR019826	Active_site	Carboxylesterase type B, active site				0	A0A024QZQ1	PF02146		A0A024R158	CL0023		A0A024QZB5	IPR028149
A0A059VCQ6	A0A059VCQ6_HUMAN	ATP6	2	A0A023I7H5		A0A024R057	SSX8	Synovial sarcoma, X breakpoint 8, isoform CRA_a	1		PF00077	Domain	RVP	Retroviral aspartyl protease	CL0129		CL0082	MIF	This clan groups 5-(carboxymethyl)-2-hydroxymuconate isomerase (CHMI) and 4-oxalocrotonate tautomerase (4-OT) with macrophage inhibitory factor (MIF). Interestingly they all share an amino-terminal proline. Members of this clan for homotrimers [1].	[1]. Crystal structure of human D-dopachrome tautomerase, a homologue of macrophage migration inhibitory factor, at 1.54 A resolution. Sugimoto H, Taniguchi M, Nakagawa A, Tanaka I, Suzuki M, Nishihira J Biochemistry 38, 3268-3279, (1999). PMID: 10079069										IPR020003	Active_site	ATPase, alpha/beta subunit, nucleotide-binding domain, active site				0	A0A024QZR9	PF01490		A0A024R161	CL0392		A0A024QZB9	IPR013087
A0A060BKR4	A0A060BKR4_HUMAN	ATP6	2	A0A023I7H5		A0A024R061	SYBL1	Synaptobrevin-like 1, isoform CRA_e	2		PF00078	Domain	RVT_1	Reverse transcriptase (RNA-dependent DNA polymerase)	CL0027		CL0083	Omega_toxin	This clan contains a set of related small protein toxins and what appears to be the functionally distinct Albumin I domain. All members of this clan have a knottin-like fold. Additional information about this clan may be found from [1].	[1]. The KNOTTIN website and database: a new information system dedicated to the knottin scaffold. Gelly JC, Gracy J, Kaas Q, Le-Nguyen D, Heitz A, Chiche L (). PMID: 14681383										IPR020548	Active_site	Fructose-1,6-bisphosphatase, active site				0	A0A024QZS2	PF11770		A0A024R163	CL0221		A0A024QZB9	IPR036236
A0A068BKC1	A0A068BKC1_HUMAN	ATP6	2	A0A023I7H5		A0A024R073	CPSF3L	Cleavage and polyadenylation specific factor 3-like, isoform CRA_c	1		PF00079	Domain	Serpin	Serpin (serine protease inhibitor)			CL0084	ADP-ribosyl	The members of this clan all represent ADP-ribosylating catalytic domains. The structurally conserved regions are located at the NAD binding region [1]. According to SCOP, the ADP-ribosylation domain is thought to have an "unusual fold".	[1]. The PARP superfamily. Ame JC, Spenlehauer C, de Murcia G Bioessays 26, 882-893, (2004). PMID: 15273990										IPR020610	Active_site	Thiolase, active site				0	A0A024QZS3	PF01569		A0A024R171	CL0123		A0A024QZC4	IPR018792
A0A068BNY9	A0A068BNY9_HUMAN	ATP6	2	A0A023I7H5		A0A024R096	C1orf119	Protein kish	2		PF00080	Domain	Sod_Cu	Copper/zinc superoxide dismutase (SODC)			CL0085	FAD_DHS	The members of this family adopt a Rossmann fold, similar to CLAN:CL0063. However, the members of this family are distinguished in that the FAD/NAD cofactor is bound in the opposite direction. In this arrangement, the adenosine moiety is found bound at the second half of the fold. In addition, the conserved GxGxxG motif found in classical NADP binding Rossmann folds is absent. Finally, another di…	[1]. Sequence-structure analysis of FAD-containing proteins. Dym O, Eisenberg D Protein Sci 10, 1712-1728, (2001). PMID: 11514662										IPR020615	Active_site	Thiolase, acyl-enzyme intermediate active site				0	A0A024QZU5	PF00378		A0A024R172	CL0063		A0A024QZC5	IPR023246
A0A068BQR7	A0A068BQR7_HUMAN	ATP6	2	A0A023I7H5		A0A024R0A3	MGC10334	Uncharacterized protein	1		PF00081	Domain	Sod_Fe_N	Iron/manganese superoxide dismutases, alpha-hairpin domain			CL0086	FAD_oxidored	The members of this clan adopt a TIM barrel fold, which is reminiscent of flavin mononucleotide binding proteins, rather than one similar to other flavin adenine dinucleotide binding domains. However, the way the FAD cofactor binds in quite different compared to the binding of FMN in the TIM-barrel structures [1].	[1]. Sequence-structure analysis of FAD-containing proteins. Dym O, Eisenberg D Protein Sci 10, 1712-1728, (2001). PMID: 11514662										IPR020625	Active_site	Schiff base-forming aldolase, active site				0	A0A024QZU5	PF00887		A0A024R172	CL0296		A0A024QZC7	IPR001909
A0A068BUM1	A0A068BUM1_HUMAN	ATP6	2	A0A023I7H5		A0A024R0B3	C1orf86	Chromosome 1 open reading frame 86, isoform CRA_c	1		PF00082	Domain	Peptidase_S8	Subtilase family			CL0087	Acyl-CoA_dh	The Acyl-CoA dehydrogenase FAD binding domain forms an mostly alpha helical domain, comprised of four helices arranged in up-and-down bundle. In Acyl-CoA oxidase II this domain appears to have been duplicated.	[1]. Sequence-structure analysis of FAD-containing proteins. Dym O, Eisenberg D Protein Sci 10, 1712-1728, (2001). PMID: 11514662										IPR020827	Active_site	Asparaginase/glutaminase, active site 1				0	A0A024QZX9	PF01764		A0A024R183	CL0016		A0A024QZC7	IPR013087
A0A068BUX7	A0A068BUX7_HUMAN	ATP6	2	A0A023I7H5		A0A024R0B7	TMEM77	Transmembrane protein 77, isoform CRA_a	2		PF00083	Family	Sugar_tr	Sugar (and other) transporter	CL0015		CL0088	Alk_phosphatase	The members of this clan all share a common structure of their catalytic domains, which contain conserved metal binding residues [1].	[1]. Conserved core structure and active site residues in alkaline phosphatase superfamily enzymes. Galperin MY, Jedrzejas MJ Proteins 45, 318-324, (2001). PMID: 11746679										IPR020830	Active_site	Glyceraldehyde 3-phosphate dehydrogenase, active site				0	A0A024QZY1	PF14497		A0A024R187	CL0158		A0A024QZC7	IPR036051
A0A068BXU9	A0A068BXU9_HUMAN	ATP6	2	A0A023I7H5		A0A024R0B8	FLJ21657	Transmembrane protein 267	1		PF00084	Domain	Sushi	Sushi repeat (SCR repeat)	CL0001		CL0089	GlnB-like	The members of this clan are characterised by the fact the domains, each comprised of four beta-strand and two alpha helices, tend to form tetrameric structures [1].	[1]. Crystal structure of ATP phosphoribosyltransferase from Mycobacterium tuberculosis. Cho Y, Sharma V, Sacchettini JC J Biol Chem 278, 8333-8339, (2003). PMID: 12511575										IPR020861	Active_site	Triosephosphate isomerase, active site				0	A0A024QZY1	PF16780		A0A024R1A2	CL0390		A0A024QZC7	IPR036236
A0A068BYY3	A0A068BYY3_HUMAN	ATP6	2	A0A023I7H5		A0A024R0B9	C1orf62	Chromosome 1 open reading frame 62, isoform CRA_c	1		PF00085	Domain	Thioredoxin	Thioredoxin	CL0172		CL0090	Globin	The globin fold is an evolutionary conserved six helical fold that is found in bacteria and eukaryotes.											IPR020878	Active_site	Ribulose bisphosphate carboxylase, large chain, active site				0	A0A024QZY1	PF18569		A0A024R1A3	CL0063		A0A024QZC8	IPR000684
A0A068C1D0	A0A068C1D0_HUMAN	ATP6	2	A0A023I7H5		A0A024R0G3	FLJ37549	C2H2-type domain-containing protein	1		PF00086	Domain	Thyroglobulin_1	Thyroglobulin type-1 repeat			CL0091	NAD_Ferredoxin	The Ferredoxin / Ferric reductase-like NAD binding domain is adopts a Rossmann like fold. However, these families have been excluded from the classical NAD(P) binding Rossmann clan (CLAN:CL0063), due to a divergence of the GxGxxG motif. In this clan, the motif phosphate binding motif is G-T/S-G-A/I-P. The changes in the motif are a reflection of the different way that the NAD(P)H is bound by this…	[1]. The three-dimensional structure of flavodoxin reductase from Escherichia coli at 1.7 A resolution. Ingelman M, Bianchi V, Eklund H J Mol Biol 268, 147-157, (1997). PMID: 9149148	[2]. Sequence-structure analysis of FAD-containing proteins. Dym O, Eisenberg D Protein Sci 10, 1712-1728, (2001). PMID: 11514662									IPR020940	Active_site	Thymidylate synthase, active site				0	A0A024QZY6	PF15344		A0A024R1B8	CL0125		A0A024QZC8	IPR013087
A0A068C3D5	A0A068C3D5_HUMAN	ATP6	2	A0A023I7H5		A0A024R0I4	FLJ13265	Cyclin N-terminal domain-containing protein	1		PF00087	Domain	Toxin_TOLIP	Snake toxin and toxin-like protein	CL0117		CL0092	ADF	For motile cells such as Amoeba to move, there must be the rapid recycling of their actin cytoskeleton to enable a dynamic change in their shape. Gelsolin (PFAM:PF00626) and Cofilin (PFAM:PF00241) are two key domain families in this process. Both of these domain are structural and functional similar [1,2]. In particular, the beta sheet found at the core of the domain is structurally well conserve…	[1]. Gelsolin and ADF/cofilin enhance the actin dynamics of motile cells. Southwick FS Proc Natl Acad Sci U S A 97, 6936-6938, (2000). PMID: 10860951	[2]. Tertiary structure of destrin and structural similarity between two actin-regulating protein families. Hatanaka H, Ogura K, Moriyama K, Ichikawa S, Yahara I, Inagaki F Cell 85, 1047-1055, (1996). PMID: 8674111									IPR022313	Active_site	Phenylalanine/histidine ammonia-lyases, active site				0	A0A024QZY9	PF15903		A0A024R1C8	CL0023		A0A024QZC8	IPR036236
A0A068C9R9	A0A068C9R9_HUMAN	ATP6	2	A0A023I7H5		A0A024R0J9	HNRPUL1	Heterogeneous nuclear ribonucleoprotein U-like 1, isoform CRA_a	1		PF00088	Domain	Trefoil	Trefoil (P-type) domain	CL0630		CL0093	Peptidase_CD	The members of this clan are all endopeptidase that have the catalytic dyad histidine followed by cysteine. The catalytic histidine is preceded by a block of hydrophobic residues and a glycine, where as the cysteine is preceded by a block of hydrophobic residues and a glutamine and an alanine. The members with a know structure adopt an alpha/beta fold [1].	[1]. Identification of the active site of legumain links it to caspases, clostripain and gingipains in a new clan of cysteine endopeptidases. Chen JM, Rawlings ND, Stevens RA, Barrett AJ FEBS Lett 441, 361-365, (1998). PMID: 9891971										IPR022398	Active_site	Peptidase S8, subtilisin, His-active site				0	A0A024QZZ4	PF00096		A0A024R1D8	CL0016		A0A024QZD2	IPR000980
A0A068CBC4	A0A068CBC4_HUMAN	ATP6	2	A0A023I7H5		A0A024R0K4	FLJ10241	Distal membrane-arm assembly complex protein 2	1		PF00089	Domain	Trypsin	Trypsin	CL0124		CL0094	Peptidase_ME	All members of this clan are characterised by a HXXEH motif, which is is involved in zinc binding. Furthermore all members adopt an alpha and beta fold. More specifically, there us a four to six stranded antiparallel beta sheet surrounded by five helices. However, LuxS (PFAM:PF02664) is not a peptidase, although its hydrolytic mechanism of catalysis appears to be conserved [1].	[1]. Crystal structure of the quorum-sensing protein LuxS reveals a catalytic metal site. Hilgers MT, Ludwig ML Proc Natl Acad Sci U S A 98, 11169-11174, (2001). PMID: 11553770										IPR022415	Active_site	ATP:guanido phosphotransferase active site				0	A0A024QZZ7	PF00125		A0A024R1D8	CL0266		A0A024QZD2	IPR001849
A0A068CCX5	A0A068CCX5_HUMAN	ATP6	2	A0A023I7H5		A0A024R0L2	MGC20255	CCD97-like C-terminal domain-containing protein	1		PF00090	Domain	TSP_1	Thrombospondin type 1 domain	CL0692		CL0095	Peptidase_ML	This clan contains HybD-like domains. HybD is a nickel binding endopeptidase. Structural and sequences analyses have highlighted the presence of two highly conserved motifs that are shared with germination proteases and HybD [1]. Members of this clan adopt an alpha/beta fold, comprised of a central beta sheet, surrounded by alpha helices.	[1]. Peptidase family U34 belongs to the superfamily of N-terminal nucleophile hydrolases. Pei J, Grishin NV Protein Sci 12, 1131-1135, (2003). PMID: 12717035										IPR022469	Active_site	6-pyruvoyl tetrahydropterin synthase, histidine active site				0	A0A024R017	PF00125		A0A024R1D8	CL0272		A0A024QZD2	IPR011993
A0A075C7R9	A0A075C7R9_HUMAN	ATP6	2	A0A023I7H5		A0A024R0P7	LOC163131	Hypothetical BC331191_1, isoform CRA_a	1		PF00091	Domain	Tubulin	Tubulin/FtsZ family, GTPase domain	CL0566		CL0096	Pept_Inhib_IE	The members of this clan are all cystine rich domains, which form a knottin scaffold. This clan should also contain alpha-amylase but currently this family is a singleton and can not be put into Pfam. Also see [1].	[1]. The KNOTTIN website and database: a new information system dedicated to the knottin scaffold. Gelly JC, Gracy J, Kaas Q, Le-Nguyen D, Heitz A, Chiche L (). PMID: 14681383										IPR022470	Active_site	6-pyruvoyl tetrahydropterin synthase, cysteine active site				0	A0A024R017	PF16211		A0A024R1H0	CL0063		A0A024QZD2	IPR015012
A0A075C7X8	A0A075C7X8_HUMAN	ATP6	2	A0A023I7H5		A0A024R0Q0	FLJ12886	Nonsense-mediated mRNA decay factor SMG9	2		PF00092	Domain	VWA	von Willebrand factor type A domain	CL0128		CL0097	TypeIII_Chap	The translocation of pathogenic proteins into a host cell is mediated by the type III secretory system. A component of this system is a chaperone, which binds to the protein which is going to be secreted in the bacterial cytosol and is involved in translocation of the secreted protein, although the chaperone is not translocated itself. An individual chaperone associates with one or two specific p…	[1]. Structure of the Yersinia type III secretory system chaperone SycE. Birtalan S, Ghosh P Nat Struct Biol 8, 974-978, (2001). PMID: 11685245										IPR023005	Active_site	Nucleoside diphosphate kinase, active site				0	A0A024R032	PF07653		A0A024R1H1	CL0172		A0A024QZD2	IPR030523
A0A075C811	A0A075C811_HUMAN	ATP6	2	A0A023I7H5		A0A024R0Q9	ADCK4	AarF domain containing kinase 4, isoform CRA_b	2		PF00093	Domain	VWC	von Willebrand factor type C domain	CL0451		CL0098	SPOUT	A distinct class of methylases that includes the SpoU and TrmD superfamilies and two superfamilies of predicted methylases defined by the YbeA and MJ0421 proteins in bacteria and archaea, respectively [1] (PFAM:PF00588 PFAM:PF01746). SPOUT is structurally distinct compared to more classical methyltransferases [1]. More specifically, the members of this clan form alpha/beta knots. Knots are extrem…	[1]. SPOUT: a class of methyltransferases that includes spoU and trmD RNA methylase superfamilies, and novel superfamilies of predicted prokaryotic RNA methylases. Anantharaman V, Koonin EV, Aravind L J Mol Microbiol Biotechnol. 4, 71-75, (2002). PMID: 11763972	[2]. Structure of the YibK methyltransferase from Haemophilus influenzae (HI0766): a cofactor bound at a site formed by a knot. Lim K, Zhang H, Tempczyk A, Krajewski W, Bonander N, Toedt J, Howard A, Eisenstein E, Herzberg O Proteins 51, 56-67, (2003). PMID: 12596263	[3]. Structural and evolutionary bioinformatics of the SPOUT superfamily of methyltransferases. Tkaczuk KL, Dunin-Horkawicz S, Purta E, Bujnicki JM (). PMID: 17338813								IPR023011	Active_site	ATP synthase, F0 complex, subunit A, active site				0	A0A024R032	PF14603		A0A024R1J8	CL0072		A0A024QZD2	IPR035057
A0A075C8F1	A0A075C8F1_HUMAN	ATP6	2	A0A023I7H5		A0A024R0S9	MYOHD1	Myosin head domain containing 1, isoform CRA_b	2		PF00094	Domain	VWD	von Willebrand factor type D domain			CL0099	ALDH-like	The aldehyde dehydrogenases (ALDHs) are a superfamily of multimeric enzymes which catalyse the oxidation of a broad range of aldehydes into their corresponding carboxylic acids with the reduction of their cofactor, NAD(P) into NAD(P)H. The way that the NAD is bound is distinct from other NAD(P)-dependent oxidoreductases. The domain represented by this clan consists of two similar subdomains.											IPR023013	Active_site	N-acetyl-gamma-glutamyl-phosphate reductase, active site				0	A0A024R049	PF00069		A0A024R1J8	CL0266		A0A024QZD2	IPR036290
A0A075C9B0	A0A075C9B0_HUMAN	ATP6	2	A0A023I7H5		A0A024R0T1	MGC4172	Short-chain dehydrogenase/reductase, isoform CRA_b	1		PF00095	Domain	WAP	WAP-type (Whey Acidic Protein) 'four-disulfide core'			CL0100	C1q_TNF	The members of the C1q and TNF superfamily are involved in a diverse set of functions, which include: defense, inflammation, apoptosis, autoimmunity differentiation, organogenesis, hibernation and insulin-resistant obesity [1]. Both C1q and TNF domains form a compact jelly-roll beta- sandwich. The core of these structures are conserved between the two families and corresponds to the detectable se…	[1]. C1q and tumor necrosis factor superfamily: modularity and versatility. Kishore U, Gaboriaud C, Waters P, Shrive AK, Greenhough TJ, Reid KB, Sim RB, Arlaud GJ Trends Immunol 25, 551-561, (2004). PMID: 15364058										IPR023232	Active_site	Glycoside hydrolase, family 2, active site				0	A0A024R054	PF04592		A0A024R1J8	CL0632		A0A024QZD2	IPR036860
A0A075QTM4	A0A075QTM4_HUMAN	ATP6	2	A0A023I7H5		A0A024R0V8	SEPW1	Selenoprotein W, 1	1		PF00096	Domain	zf-C2H2	Zinc finger, C2H2 type	CL0361		CL0101	PELOTA	The members of this clan are all involved in binding to ribose sugar of RNA[1]. Indeed, the key RNA binding residues are conserved across the different families [1]. Members of this clan form mixed alpha-helical and beta-sheet structures [1][2].	[1]. Comparative genomics and evolution of proteins involved in RNA metabolism. Anantharaman V, Koonin EV, Aravind L Nucleic Acids Res. 30, 1427-1464, (2002). PMID: 11917006	[2]. The structure of the RlmB 23S rRNA methyltransferase reveals a new methyltransferase fold with a unique knot. Michel G, Sauve V, Larocque R, Li Y, Matte A, Cygler M Structure (Camb) 10, 1303-1315, (2002). PMID: 12377117									IPR023313	Active_site	Ubiquitin-conjugating enzyme, active site				0	A0A024R061	PF00957		A0A024R1J8	CL0719		A0A024QZD5	IPR000504
A0A075QVS9	A0A075QVS9_HUMAN	ATP6	2	A0A023I7H5		A0A024R0W7	PRICKLE1	Prickle-like 1 (Drosophila), isoform CRA_a	5		PF00097	Domain	zf-C3HC4	Zinc finger, C3HC4 type (RING finger)	CL0229		CL0103	Gal_mutarotase	This clan is composed of a beta-sandwich that was first observed in domain 5 of beta-galactosidase, then as the central domain of copper amine oxidase, the C-terminal domain of chondroitinase, the C-terminal domain of hyaluronate lyase, the N-terminal domain of maltose phosphorylase and in Galactose Mutarotase [1]. All these enzymes act on a sugar substrate.	[1]. High resolution X-ray structure of galactose mutarotase from Lactococcus lactis. Thoden JB, Holden HM J Biol Chem 277, 20854-20861, (2002). PMID: 11907040										IPR023406	Active_site	DNA topoisomerase, type IA, active site				0	A0A024R061	PF13774		A0A024R1L5	CL0192		A0A024QZD5	IPR012677
A0A075X6H8	A0A075X6H8_HUMAN	ATP6	2	A0A023I7H5		A0A024R0X0	AP1GBP1	AP1 gamma subunit binding protein 1, isoform CRA_d	1		PF00098	Domain	zf-CCHC	Zinc knuckle	CL0511		CL0104	Glyoxalase	This clan contains the VOC metalloenzyme superfamily [1]. The known types of reactions that are catalysed include isomerizations (glyoxalase I), epimerizations (methylmalonyl-CoA epimerase), oxidative cleavage of C-C bonds (extradiol dioxygenase), and nucleophilic substitutions (fosfomycin resistance proteins) [1].	[1]. Mechanistic diversity in a metalloenzyme superfamily. Armstrong RN Biochemistry 39, 13625-13632, (2000). PMID: 11076500										IPR023411	Active_site	Ribonuclease A, active site				0	A0A024R073	PF07521		A0A024R1M3	CL0602		A0A024QZD5	IPR022023
A0A075X6T8	A0A075X6T8_HUMAN	ATP6	2	A0A023I7H5		A0A024R0Z2	FLJ13236	DnaJ homolog subfamily C member 22	1		PF00100	Family	Zona_pellucida	Zona pellucida-like domain	CL0159		CL0105	Hybrid	This superfamily contains proteins with a hybrid motif [1]. This motif is embedded in structurally diverse proteins.	[1]. New folds for all-beta proteins. Chothia C, Murzin AG Structure 1, 217-222, (1993). PMID: 8081735										IPR023650	Active_site	Beta-lactamase, class-A active site				0	A0A024R073	PF10996		A0A024R1M5	CL0033		A0A024QZD5	IPR034143
A0A075X6V4	A0A075X6V4_HUMAN	ATP6	2	A0A023I7H5		A0A024R0Z5	TEGT	Bax inhibitor 1, Testis-enhanced gene transcript protein, Transmembrane BAX inhibitor motif-containing protein 6	3		PF00101	Domain	RuBisCO_small	Ribulose bisphosphate carboxylase, small chain			CL0106	6PGD_C	This helical domain is found associated with Rossmann domains.											IPR023827	Active_site	Peptidase S8, subtilisin, Asp-active site				0	A0A024R073	PF16661		A0A024R1M5	CL0361		A0A024QZD5	IPR035979
A0A075X6V9	A0A075X6V9_HUMAN	ATP6	2	A0A023I7H5		A0A024R115	FAM113B	Family with sequence similarity 113, member B, isoform CRA_a	1		PF00102	Domain	Y_phosphatase	Protein-tyrosine phosphatase	CL0031		CL0107	KOW	This superfamily includes proteins involved in translation that have a KOW like SH3-fold.											IPR023828	Active_site	Peptidase S8, subtilisin, Ser-active site				0	A0A024R096	PF06842		A0A024R1P7	CL0123		A0A024QZE4	IPR002072
A0A076MIK7	A0A076MIK7_HUMAN	ATP6	2	A0A023I7H5		A0A024R118	METTL7A	Methyltransferase like 7A, isoform CRA_a	1		PF00103	Domain	Hormone_1	Somatotropin hormone family	CL0053		CL0108	Actin_ATPase	The actin-like ATPase domain forms an alpha/beta canonical fold. The domain can be subdivided into 1A, 1B, 2A and 2B subdomains. Subdomains 1A and 1B share the same RNAseH-like fold (a five-stranded beta-sheet decorated by a number of alpha-helices). Domains 1A and 2A are conserved in all members of this superfamily, whereas domain 1B and 2B have a variable structure and are even missing from som…	[1]. The structure of the cytoplasmic domain of EpsL, an inner membrane component of the type II secretion system of Vibrio cholerae: an unusual member of the actin-like ATPase superfamily. Abendroth J, Bagdasarian M, Sandkvist M, Hol WG J Mol Biol 344, 619-633, (2004). PMID: 15533433										IPR024708	Active_site	Catalase active site				0	A0A024R0B3	PF15751		A0A024R1P7	CL0202		A0A024QZE4	IPR019846
A0A076MLZ1	A0A076MLZ1_HUMAN	ATP6	2	A0A023I7H5		A0A024R123	PLEKHA9	Pleckstrin homology domain containing, family A (Phosphoinositide binding specific) member 9, isoform CRA_a	1		PF00104	Domain	Hormone_recep	Ligand-binding domain of nuclear hormone receptor			CL0109	CDA	This clan contains both free nucleotide and nucleic acid deaminases that act on adenosine, cytosine, guanine and cytidine, and are collectively known as the deaminase superfamily. The conserved fold consists of a three-layered alpha/beta/alpha structure with 3 helices and 4 strands in the 2134 order [1,2].This superfamily is further divided into two major divisions based on the presence of a heli…	[1]. Crystal structure of Bacillus subtilis guanine deaminase: the first domain-swapped structure in the cytidine deaminase superfamily. Liaw SH, Chang YJ, Lai CT, Chang HC, Chang GG J Biol Chem 279, 35479-35485, (2004). PMID: 15180998	[2]. Evolution of the deaminase fold and multiple origins of eukaryotic editing and mutagenic nucleic acid deaminases from bacterial toxin systems. Iyer LM, Zhang D, Rogozin IB, Aravind L (). PMID: 21890906									IPR025660	Active_site	Cysteine peptidase, histidine active site				0	A0A024R0B7	PF10277		A0A024R1Q3	CL0023		A0A024QZE4	IPR020408
A0A096VTP9	A0A096VTP9_HUMAN	ATP6	2	A0A023I7H5		A0A024R128	C12orf44	Autophagy-related protein 101	2		PF00105	Domain	zf-C4	Zinc finger, C4 type (two domains)	CL0167		CL0110	GT-A	This is the GT-A clan that contains diverse glycosyltransferases that possess a Rossmann like fold [1].	[1]. Three monophyletic superfamilies account for the majority of the known glycosyltransferases. Liu J, Mushegian A Protein Sci 12, 1418-1431, (2003). PMID: 12824488										IPR025661	Active_site	Cysteine peptidase, asparagine active site				0	A0A024R0B9	PF12443		A0A024R1U9	CL0525		A0A024QZE4	IPR020432
A0A096VTU4	A0A096VTU4_HUMAN	ATP6	2	A0A023I7H5		A0A024R129	C12orf25	Chromosome 12 open reading frame 25, isoform CRA_a	1		PF00106	Domain	adh_short	short chain dehydrogenase	CL0063		CL0111	GT-C	This is the GT-C clan that contains diverse glycosyltransferases that possess 8-13 predicted transmembrane segments [1].	[1]. Three monophyletic superfamilies account for the majority of the known glycosyltransferases. Liu J, Mushegian A Protein Sci 12, 1418-1431, (2003). PMID: 12824488										IPR027475	Active_site	Asparaginase/glutaminase, active site 2				0	A0A024R0G3	PF00096		A0A024R1Y5	CL0023		A0A024QZE4	IPR029034
A0A096VW93	A0A096VW93_HUMAN	ATP6	2	A0A023I7H5		A0A024R131	C12orf41	KAT8 regulatory NSL complex subunit 2, NSL complex protein NSL2, Non-specific lethal 2 homolog	2		PF00107	Domain	ADH_zinc_N	Zinc-binding dehydrogenase	CL0063		CL0112	Yip1	Yip1 and YIF1 are members of an integral membrane complex which bind to Ras-like GTPases and are required for membrane fusion of ER derived vesicles with the Golgi [1].	[1]. The Yip1p.Yif1p complex is required for the fusion competence of endoplasmic reticulum-derived vesicles. Barrowman J, Wang W, Zhang Y, Ferro-Novick S J Biol Chem. 278, 19878-19884, (2003). PMID: 12657649										IPR028301	Active_site	Serine proteases, V8 family, histidine active site				0	A0A024R0I4	PF00134		A0A024R1Y5	CL0080		A0A024QZE6	IPR006968
A0A096VY74	A0A096VY74_HUMAN	ATP6	2	A0A023I7H5		A0A024R141	CTSL2	Cathepsin L2, isoform CRA_a	1		PF00108	Domain	Thiolase_N	Thiolase, N-terminal domain	CL0046		CL0113	GT-B	This is the GT-B clan that contains diverse glycosyltransferases that possess a Rossmann like fold [1].	[1]. Three monophyletic superfamilies account for the majority of the known glycosyltransferases. Liu J, Mushegian A Protein Sci 12, 1418-1431, (2003). PMID: 12824488										IPR029759	Active_site	Glutathione peroxidase active site				0	A0A024R0J9	PF00622		A0A024R1Y7	CL0378		A0A024QZE9	IPR012981
A0A096VYY1	A0A096VYY1_HUMAN	ATP6	2	A0A023I7H5		A0A024R154	RP11-35N6.1	Plasticity related gene 3, isoform CRA_a	2		PF00109	Domain	ketoacyl-synt	Beta-ketoacyl synthase, N-terminal domain	CL0046		CL0114	HMG-box	This clan includes the DNA-binding HMG-box proteins as well as the YABBY-like transcription factors.											IPR030390	Active_site	RNA methyltransferase TrmA, active site				0	A0A024R0J9	PF13671		A0A024R1Z9	CL0059		A0A024QZE9	IPR041442
A0A096VZZ3	A0A096VZZ3_HUMAN	ATP6	2	A0A023I7H5		A0A024R158	SMC2L1	Structural maintenance of chromosomes protein	3		PF00110	Family	wnt	wnt family			CL0115	Steroid_dh	This clan includes several enzymes, including steroid dehydrogenases and isoprenylcysteine carboxyl methyltransferase enzymes. These protein contain a varying number of transmembrane regions.											IPR030458	Active_site	Glycosyl hydrolases family 31, active site				0	A0A024R0L2	PF09747		A0A024R216	CL0049		A0A024QZF7	IPR026069
A0A096W0M4	A0A096W0M4_HUMAN	ATP6	2	A0A023I7H5		A0A024R161	DNAJC25-GNG10	Guanine nucleotide-binding protein subunit gamma	2		PF00111	Domain	Fer2	2Fe-2S iron-sulfur cluster binding domain	CL0486		CL0116	Calycin	The calycin structural superfamily [1-3] includes the lipocalins, the fatty acid-binding proteins (FABPs).	[1]. The lipocalin protein family: structural and sequence overview. Flower DR, North AC, Sansom CE Biochim Biophys Acta 1482, 9-24, (2000). PMID: 11058743	[2]. Structural relationship of streptavidin to the calycin protein superfamily. Flower DR FEBS Lett 333, 99-102, (1993). PMID: 8224179	[3]. Structure and sequence relationships in the lipocalins and related proteins. Flower DR, North AC, Attwood TK Protein Sci 2, 753-761, (1993). PMID: 7684291								IPR030475	Active_site	Ribonucleotide reductase small subunit, acitve site				0	A0A024R0P7	PF00096		A0A024R228	CL0007		A0A024QZF7	IPR043970
A0A096WTX2	A0A096WTX2_HUMAN	ATP6	2	A0A023I7H5		A0A024R163	ROD1	ROD1 regulator of differentiation 1 (S. pombe), isoform CRA_b	1		PF00112	Domain	Peptidase_C1	Papain family cysteine protease	CL0125		CL0117	uPAR_Ly6_toxin	This superfamily contains snake toxins as well as extracellular cysteine rich domains.											IPR030656	Active_site	Delta-aminolevulinic acid dehydratase, active site				0	A0A024R0P7	PF01352		A0A024R235	CL0260		A0A024QZF7	IPR043971
A0A096WX18	A0A096WX18_HUMAN	ATP6	2	A0A023I7H5		A0A024R171	C9orf30	Chromosome 9 open reading frame 30, isoform CRA_a	1		PF00113	Domain	Enolase_C	Enolase, C-terminal TIM barrel domain	CL0256		CL0118	Ribokinase	All of these enzymes are phosphotransferases that have an alcohol group as an acceptor (EC:2.7.1.-). However, 4-amino-5-hydroxymethyl-2-methylpyrimidine phosphate kinase (HMPP kinase) catalyses two phosphorylation reactions: one to a hydroxymethyl group of hydroxymethyl pyrimidine (HMP) and the second to the phosphomethyl group of HMPP [1]. The common structural feature for the enzymes in this su…	[1]. Crystal structure of an aminoimidazole riboside kinase from Salmonella enterica: implications for the evolution of the ribokinase superfamily. Zhang Y, Dougherty M, Downs DM, Ealick SE Structure (Camb) 12, 1809-1821, (2004). PMID: 15458630										IPR031158	Active_site	Glycosyl hydrolases family 10, active site				0	A0A024R0P7	PF13912		A0A024R235	CL0511		A0A024QZF7	IPR043972
A0A096Y7G3	A0A096Y7G3_HUMAN	ATP6	2	A0A023I7H5		A0A024R172	LTB4DH	Prostaglandin reductase 1, 1.3.1.48, 1.3.1.74, 15-oxoprostaglandin 13-reductase, Dithiolethione-inducible gene 1 protein, Leukotriene B4 12-hydroxydehydrogenase, NAD(P)H-dependent alkenal/one oxidoreductase	5		PF00114	Domain	Pilin	Pilin (bacterial filament)	CL0327		CL0121	Cystatin	This superfamily includes cystatins and cathelicidins [1]. The cystatin superfamily comprises cysteine protease inhibitors that play key regulatory roles in protein degradation processes. The progenitor of this superfamily was most probably intracellular and lacked a signal peptide and disulfide bridges, much like the extant Giardia cystatin. A primordial gene duplication produced two ancestral e…	[1]. Sweet-tasting protein monellin is related to the cystatin family of thiol proteinase inhibitors. Murzin AG J Mol Biol 230, 689-694, (1993). PMID: 8464079	[2]. Phylogenomic analysis of the cystatin superfamily in eukaryotes and prokaryotes. Kordis D, Turk V (). PMID: 19919722									IPR031337	Active_site	KDPG/KHG aldolase, active site 1				0	A0A024R0Q0	PF10220		A0A024R244	CL0016		A0A024QZG5	IPR001909
A0A096Y961	A0A096Y961_HUMAN	ATP6	2	A0A023I7H5		A0A024R175	ZNF673	Zinc finger protein 673, isoform CRA_a	1		PF00115	Family	COX1	Cytochrome C and Quinol oxidase polypeptide I	CL0714		CL0122	UTRA	This clan includes chorismate lyase as well as the UTRA domain	[1]. HutC/FarR-like bacterial transcription factors of the GntR family contain a small molecule-binding domain of the chorismate lyase fold. Aravind L, Anantharaman V FEMS Microbiol Lett 222, 17-23, (2003). PMID: 12757941										IPR031338	Active_site	KDPG/KHG aldolase, active site 2				0	A0A024R0Q9	PF03109		A0A024R244	CL0541		A0A024QZG5	IPR036051
A0A096YAI4	A0A096YAI4_HUMAN	ATP6	2	A0A023I7H5		A0A024R183	PCTK1	PCTAIRE protein kinase 1, isoform CRA_b	2		PF00116	Domain	COX2	Cytochrome C oxidase subunit II, periplasmic domain	CL0026		CL0123	HTH	This family contains a diverse range of mostly DNA-binding domains that contain a helix-turn-helix motif.	[1]. The helix-turn-helix DNA binding motif. Brennan RG, Matthews BW J Biol Chem 264, 1903-1906, (1989). PMID: 2644244	[2]. The winged-helix DNA-binding motif: another helix-turn-helix takeoff. Brennan RG Cell 74, 773-776, (1993). PMID: 8374950	[3]. Structural classification of HTH DNA-binding domains and protein-DNA interaction modes. Wintjens R, Rooman M J Mol Biol 262, 294-313, (1996). PMID: 8831795								IPR033112	Active_site	Phospholipase A2, aspartic acid active site				0	A0A024R0S9	PF00063		A0A024R259	CL0020		A0A024QZH6	IPR042841
A0A097PY54	A0A097PY54_HUMAN	ATP6	2	A0A023I7H5		A0A024R187	LOC150223	Carbohydrate deacetylase	2		PF00117	Domain	GATase	Glutamine amidotransferase class-I	CL0014		CL0124	Peptidase_PA	This clan contains a diverse set of peptidases with the trypsin fold.											IPR033113	Active_site	Phospholipase A2, histidine active site				0	A0A024R0T1	PF00106		A0A024R282	CL0465		A0A024QZI8	IPR022735
A0A097PYQ8	A0A097PYQ8_HUMAN	ATP6	2	A0A023I7H5		A0A024R188	C9orf125	Chromosome 9 open reading frame 125, isoform CRA_a	1		PF00118	Family	Cpn60_TCP1	TCP-1/cpn60 chaperonin family			CL0125	Peptidase_CA	This clan includes peptidases with the papain-like fold.											IPR033116	Active_site	Serine proteases, trypsin family, serine active site				0	A0A024R0V8	PF10262		A0A024R292	CL0063		A0A024QZI8	IPR040127
A0A097PYS3	A0A097PYS3_HUMAN	ATP6	2	A0A023I7H5		A0A024R1A2	PHF16	PHD finger protein 16, isoform CRA_a	1		PF00119	Domain	ATP-synt_A	ATP synthase A chain			CL0126	Peptidase_MA	Clan MA is one of two zinc-dependent metallopeptidases that contain the HEXXH motif. The two histidines are zinc ligands. The structures of this clan show the active site is between its two sub-domains.											IPR033119	Active_site	Glycoside hydrolase family 11, active site 2				0	A0A024R0W7	PF00412		A0A024R294	CL0123		A0A024QZJ5	IPR000504
A0A097PZD5	A0A097PZD5_HUMAN	ATP6	2	A0A023I7H5		A0A024R1A3	UBE1	E1 ubiquitin-activating enzyme, 6.2.1.45, Ubiquitin-activating enzyme E1	3		PF00120	Domain	Gln-synt_C	Glutamine synthetase, catalytic domain	CL0286		CL0127	ClpP_crotonase	This family includes several peptidases of peptidase clan SK as well as crotonase like proteins.	[1]. Consistency analysis of similarity between multiple alignments: prediction of protein function and fold structure from analysis of local sequence motifs. Kunin V, Chan B, Sitbon E, Lithwick G, Pietrokovski S J Mol Biol 307, 939-949, (2001). PMID: 11273712	[2]. Crystal structure of the carboxyltransferase domain of acetyl-coenzyme A carboxylase. Zhang H, Yang Z, Shen Y, Tong L Science 299, 2064-2067, (2003). PMID: 12663926									IPR033124	Active_site	Serine carboxypeptidases, histidine active site				0	A0A024R0W7	PF06297		A0A024R2A8	CL0123		A0A024QZJ5	IPR006535
A0A097Q1B9	A0A097Q1B9_HUMAN	ATP6	2	A0A023I7H5		A0A024R1B8	C22orf13	Chromosome 22 open reading frame 13, isoform CRA_a	1		PF00121	Domain	TIM	Triosephosphate isomerase	CL0036		CL0128	vWA-like	To add.	[1]. Distribution and evolution of von Willebrand/integrin A domains: widely dispersed domains with roles in cell adhesion and elsewhere. Whittaker CA, Hynes RO Mol Biol Cell 13, 3369-3387, (2002). PMID: 12388743										IPR033126	Active_site	Glycosyl hydrolases family 9, Asp/Glu active sites				0	A0A024R0Z2	PF00226		A0A024R2Q1	CL0431		A0A024QZJ5	IPR012677
A0A097Q1W7	A0A097Q1W7_HUMAN	ATP6	2	A0A023I7H5		A0A024R1C5	FLJ33814	Coiled-coil domain-containing protein 117	1		PF00122	Family	E1-E2_ATPase	E1-E2 ATPase			CL0129	Peptidase_AA	This clan contains aspartic peptidases, including the pepsins and retropepsins. These enzymes contains a catalytic dyad composed of two aspartates. In the retropepsins one is provided by each copy of a homodimeric protein, whereas in the pepsin-like peptidases these aspartates come from a single protein composed of two duplicated domains.											IPR033127	Active_site	Ubiquitin-activating enzyme E1, Cys active site				0	A0A024R0Z2	PF05154		A0A024R2Q3	CL0020		A0A024QZJ5	IPR034538
A0A097Q3H9	A0A097Q3H9_HUMAN	ATP6	2	A0A023I7H5		A0A024R1C8	RRP22	RAS-related on chromosome 22, isoform CRA_a	1		PF00123	Family	Hormone_2	Peptide hormone			CL0130	Peptidase_AD	Members of this clan are peptidases that are integral membrane proteins. The catalytic aspartate is in the conserved GXGD motif.											IPR033128	Active_site	Adenylosuccinate synthase, active site				0	A0A024R0Z5	PF01027		A0A024R2R3	CL0517		A0A024QZJ5	IPR035979
A0A097Q3M6	A0A097Q3M6_HUMAN	ATP6	2	A0A023I7H5		A0A024R1D4	DKFZp434K191	POM121-like protein 1	1		PF00124	Family	Photo_RC	Photosynthetic reaction centre protein			CL0131	DoxD-like	The families in this clan are all membrane proteins. The DoxD family is found on enzymes involved in elemental sulphur oxidation [1]. The other families in this clan are poorly characterised.	[1]. The terminal quinol oxidase of the hyperthermophilic archaeon Acidianus ambivalens exhibits a novel subunit structure and gene organization. Purschke WG, Schmidt CL, Petersen A, Schafer G J Bacteriol 179, 1344-1353, (1997). PMID: 9023221										IPR033129	Active_site	Phosphoenolpyruvate carboxylase, His active site				0	A0A024R118	PF08241		A0A024R2S0	CL0416		A0A024QZJ5	IPR044461
A0A097Q610	A0A097Q610_HUMAN	ATP6	2	A0A023I7H5		A0A024R1D8	ADRBK2	G protein-coupled receptor kinase, 2.7.11.-	2		PF00125	Domain	Histone	Core histone H2A/H2B/H3/H4	CL0012		CL0132	AbrB	This superfamily includes the DNA-binding domain of AbrB as well as the presumed DNA-binding protein MraZ (per. comm. A Andreeva and A Murzin).											IPR033130	Active_site	Ribonuclease T2, His active site 2				0	A0A024R123	PF08718		A0A024R2T8	CL0263		A0A024QZJ8	IPR000719
A0A097QB54	A0A097QB54_HUMAN	ATP6	2	A0A023I7H5		A0A024R1E4	MTP18	Mitochondrial fission process protein 1, Mitochondrial 18 kDa protein	2		PF00126	Domain	HTH_1	Bacterial regulatory helix-turn-helix protein, lysR family	CL0123		CL0133	AT14A-like	This clan contains plant proteins. DUF677 family members are AT14A-like proteins that have sequence similarity to fungal, insect and human integrins [1]. The other members of this clan are poorly characterised.	[1]. Isolation and characterization of a cDNA clone from Arabidopsis thaliana with partial sequence similarity to integrins. Nagpal P, Quatrano RS Gene 230, 33-40, (1999). PMID: 10196471										IPR033131	Active_site	Pectinesterase, Asp active site				0	A0A024R128	PF07855		A0A024R2X2	CL0016		A0A024QZJ8	IPR011009
A0A097QCA4	A0A097QCA4_HUMAN	ATP6	2	A0A023I7H5		A0A024R1H0	RP5-1119A7.4	FAD-dependent oxidoreductase domain-containing protein 2	1		PF00127	Domain	Copper-bind	Copper binding proteins, plastocyanin/azurin family	CL0026		CL0135	Arrestin_N-like	The families in this clan are involved in vacuolar protein trafficking, G protein signal termination and sporulation. The Arrestin N terminal domain has an Ig-like beta sandwich fold which binds to receptors and impairs their capacity to active G proteins [1]. Arrestins have also been implicated in the endocytosis of receptors and cross talk with other signalling pathways [2].	[1]. X-ray crystal structure of arrestin from bovine rod outer segments. Granzin J, Wilden U, Choe HW, Labahn J, Krafft B, Buldt G Nature 391, 918-921, (1998). PMID: 9495348	[2]. Endocytosis of G protein-coupled receptors: roles of G protein-coupled receptor kinases and beta-arrestin proteins. Claing A, Laporte SA, Caron MG, Lefkowitz RJ Prog Neurobiol 66, 61-79, (2002). PMID: 11900882	[3]. Human orthologs of yeast vacuolar protein sorting proteins Vps26, 29, and 35: assembly into multimeric complexes. Haft CR, de la Luz Sierra M, Bafford R, Lesniak MA, Barr VA, Taylor SI Mol Biol Cell 11, 4105-4116, (2000). PMID: 11102511	[4]. A novel sporulation-control gene (spo0M) of Bacillus subtilis with a sigmaH-regulated promoter. Han WD, Kawamoto S, Hosoya Y, Fujita M, Sadaie Y, Suzuki K, Ohashi Y, Kawamura F, Ochi K Gene 217, 31-40, (1998). PMID: 9795118							IPR033134	Active_site	Asp/Glu racemase, active site 2				0	A0A024R131	PF13891		A0A024R328	CL0006		A0A024QZJ8	IPR017441
A0A097QD97	A0A097QD97_HUMAN	ATP6	2	A0A023I7H5		A0A024R1H1	SELM	Selenoprotein M	1		PF00128	Domain	Alpha-amylase	Alpha amylase, catalytic domain	CL0058		CL0136	Plasmid-antitox	The families in this clan are plasmid encoded anti-toxins involved in plasmid maintenance. The plasmid encodes both a toxin and an antitoxin. Upon loss of the plasmid the antitoxin is inactivated more rapidly than the toxin. This allows the toxin to interact with its target thus killing the cell or impeding growth.	[1]. New connections in the prokaryotic toxin-antitoxin network: relationship with the eukaryotic nonsense-mediated RNA decay system. Anantharaman V, Aravind L (). PMID: 14659018	[2]. A new plasmid-encoded proteic killer gene system: cloning, sequencing, and analyzing hig locus of plasmid Rts1. Tian QB, Ohnishi M, Tabuchi A, Terawaki Y Biochem Biophys Res Commun 220, 280-284, (1996). PMID: 8645296	[3]. Axe-Txe, a broad-spectrum proteic toxin-antitoxin system specified by a multidrug-resistant, clinical isolate of Enterococcus faecium. Grady R, Hayes F Mol Microbiol 47, 1419-1432, (2003). PMID: 12603745								IPR033135	Active_site	ClpP, histidine active site				0	A0A024R141	PF00112		A0A024R328	CL0016		A0A024QZK1	IPR032727
A0A0A0QMI3	A0A0A0QMI3_HUMAN	ATP6	2	A0A023I7H5		A0A024R1J8	NF2	Neurofibromin 2 (Bilateral acoustic neuroma), isoform CRA_a	5		PF00129	Domain	MHC_I	Class I Histocompatibility antigen, domains alpha 1 and 2	CL0343		CL0137	HAD	This clan represents the haloacid dehalogenase (HAD) superfamily that includes a diverse range of enzymes that use an asp carboxylate as a nucleophile [1].	[1]. Computer analysis of bacterial haloacid dehalogenases defines a large superfamily of hydrolases with diverse specificity. Application of an iterative approach to database search. Koonin EV, Tatusov RL J Mol Biol 244, 125-132, (1994). PMID: 7966317	[2]. The catalytic domain of the P-type ATPase has the haloacid dehalogenase fold. Aravind L, Galperin MY, Koonin EV Trends Biochem Sci 23, 127-129, (1998). PMID: 9584613									IPR033139	Active_site	Peptidase family C14A, cysteine active site				0	A0A024R141	PF08246		A0A024R333	CL0186		A0A024QZK5	IPR003719
A0A0B5H1L7	A0A0B5H1L7_HUMAN	ATP6	2	A0A023I7H5		A0A024R1L3	RP5-1104E15.5	Mab-21-like HhH/H2TH-like domain-containing protein	2		PF00130	Domain	C1_1	Phorbol esters/diacylglycerol binding domain (C1 domain)	CL0006		CL0139	GADPH_aa-bio_dh	This clan contains the C terminal domains of dehydrogenase enzymes involved in the biosynthesis of arginine, aspartate and aspartate derived amino acids. It also contains the C terminal domain of GAPDH, a dehydrogenase involved in glycolysis and gluconeogenesis.	[1]. [Levels of DNA and RNA in the carcinomatous tissue of the collum uteri before and after application of Cytembena (author's transl)]. Novotna J, Jandova A, Janouskova M, Laurova L, Skoda V Cesk Gynekol 41, 733-734, (1976). PMID: 1036977	[2]. Crystal structure of glycosomal glyceraldehyde-3-phosphate dehydrogenase from Leishmania mexicana: implications for structure-based drug design and a new position for the inorganic phosphate binding site. Kim H, Feil IK, Verlinde CL, Petra PH, Hol WG Biochemistry 34, 14975-14986, (1995). PMID: 7578111									IPR033140	Active_site	Lipase, GDXG, putative serine active site				0	A0A024R154	PF01569		A0A024R355	CL0219		A0A024QZK8	IPR000504
A0A0D4BJ88	A0A0D4BJ88_HUMAN	ATP6	2	A0A023I7H5		A0A024R1L5	C22orf5	Chromosome 22 open reading frame 5, isoform CRA_b	1		PF00131	Domain	Metallothio	Metallothionein	CL0461		CL0140	Viral_NABP	This clan contains viral nucleic acid binding protein families. Two of the families in this clan are known to contain zinc finger motifs [1][2].	[1]. The p23 protein of citrus tristeza virus controls asymmetrical RNA accumulation. Satyanarayana T, Gowda S, Ayllon MA, Albiach-Marti MR, Rabindran S, Dawson WO J Virol 76, 473-483, (2002). PMID: 11752137	[2]. The 12 kDa protein of potato virus M displays properties of a nucleic acid-binding regulatory protein. Gramstat A, Courtpozanis A, Rohde W FEBS Lett 276, 34-38, (1990). PMID: 2265707									IPR033379	Active_site	Histidine acid phosphatase active site				0	A0A024R158	PF02463		A0A024R355	CL0306		A0A024QZK8	IPR012677
A0A0D4BKT5	A0A0D4BKT5_HUMAN	ATP6	2	A0A023I7H5		A0A024R1M3	MGC17330	HGFL gene, isoform CRA_a	2		PF00132	Repeat	Hexapep	Bacterial transferase hexapeptide (six repeats)	CL0536		CL0141	MtN3-like	The clan forms a large and diverse family of proteins with seven transmembrane helices, common topology and, most likely, similar function. Their coding genes exist in all eukaryota and in several prokaryota. Some are responsible for metabolic diseases (cystinosis, congenital disorder of glycosylation), others are candidate genes for genetic disorders (cleft lip and palate, certain forms of cance…	[1]. Use of a subtractive hybridization approach to identify new Medicago truncatula genes induced during root nodule development. Gamas P, Niebel Fd, Lescure N, Cullimore J Mol Plant Microbe Interact 9, 233-242, (1996). PMID: 8634476	[2]. Molecular cloning and characterization of a novel stromal cell-derived cDNA encoding a protein that facilitates gene activation of recombination activating gene (RAG)-1 in human lymphoid progenitors. Tagoh H, Kishi H, Muraguchi A Biochem Biophys Res Commun 221, 744-749, (1996). PMID: 8630032	[3]. Cystinosin, MPDU1, SWEETs and KDELR belong to a well-defined protein family with putative function of cargo receptors involved in vesicle trafficking. Saudek V (). PMID: 22363504								IPR033524	Active_site	Leu/Phe/Val dehydrogenases active site				0	A0A024R158	PF06470		A0A024R390	CL0219		A0A024QZK8	IPR034969
A0A0D4BLE5	A0A0D4BLE5_HUMAN	ATP6	2	A0A023I7H5		A0A024R1M5	ZNF278	Zinc finger protein 278, isoform CRA_c	2		PF00133	Family	tRNA-synt_1	tRNA synthetases class I (I, L, M and V)	CL0039		CL0142	Membrane_trans	This clan contains membrane proteins involved in the transport of molecules including amino acids sugars and signalling molecules. It also includes integral membrane cell cycle proteins and some putative ammonia monooxygenases.	[1]. Nucleotide sequences of the fecBCDE genes and locations of the proteins suggest a periplasmic-binding-protein-dependent transport mechanism for iron(III) dicitrate in Escherichia coli. Staudenmaier H, Van Hove B, Yaraghi Z, Braun V J Bacteriol 171, 2626-2633, (1989). PMID: 2651410	[2]. Structure and mechanism of ABC transporters. Schmitt L, Tampe R Curr Opin Struct Biol 12, 754-760, (2002). PMID: 12504680	[3]. Nucleotide sequence and analysis of the mgl operon of Escherichia coli K12. Hogg RW, Voelker C, Von Carlowitz I Mol Gen Genet 229, 453-459, (1991). PMID: 1719366	[4]. Structural similarity among Escherichia coli FtsW and RodA proteins and Bacillus subtilis SpoVE protein, which function in cell division, cell elongation, and spore formation, respectively. Ikeda M, Sato T, Wachi M, Jung HK, Ishino F, Kobayashi Y, Matsuhashi M J Bacteriol 171, 6375-6378, (1989). PMID: 2509435							IPR033693	Active_site	Pyroglutamyl peptidase I, Glu active site				0	A0A024R161	PF00226		A0A024R390	CL0221		A0A024QZK8	IPR034970
A0A0D4BLN4	A0A0D4BLN4_HUMAN	ATP6	2	A0A023I7H5		A0A024R1M6	MGC3731	Nucleolar protein 12	2		PF00134	Domain	Cyclin_N	Cyclin, N-terminal domain	CL0065		CL0143	B_Fructosidase	This beta fructosidase superfamily [4] is composed of glycosyl hydrolase families. The members of this clan adopt a five-bladed beta-propeller fold [2-3]. The beta-fructosidase superfamily is also known as furanosidase superfamily [4].	[1]. Cloning, nucleotide sequence, and expression in Escherichia coli of levansucrase genes from the plant pathogens Pseudomonas syringae pv. glycinea and P. syringae pv. phaseolicola. Hettwer U, Jaeckel FR, Boch J, Meyer M, Rudolph K, Ullrich MS Appl Environ Microbiol 64, 3180-3187, (1998). PMID: 9726857	[2]. Cellvibrio japonicus alpha-L-arabinanase 43A has a novel five-blade beta-propeller fold. Nurizzo D, Turkenburg JP, Charnock SJ, Roberts SM, Dodson EJ, McKie VA, Taylor EJ, Gilbert HJ, Davies GJ Nat Struct Biol 9, 665-668, (2002). PMID: 12198486	[3]. The three-dimensional structure of invertase (beta-fructosidase) from Thermotoga maritima reveals a bimodular arrangement and an evolutionary relationship between retaining and inverting glycosidases. Alberto F, Bignon C, Sulzenbacher G, Henrissat B, Czjzek M J Biol Chem 279, 18903-18910, (2004). PMID: 14973124	[4]. beta-fructosidase superfamily: homology with some alpha-L-arabinases and beta-D-xylosidases. Naumoff DG Proteins. 42, 66-76, (2001). PMID: 11093261							IPR033694	Active_site	Pyroglutamyl peptidase I, Cys active site				0	A0A024R161	PF00631		A0A024R395	CL0163		A0A024QZK8	IPR035979
A0A0D4WP22	A0A0D4WP22_HUMAN	ATP6	2	A0A023I7H5		A0A024R1P7	UNC84B	Unc-84 homolog B (C. elegans), isoform CRA_b	2		PF00135	Domain	COesterase	Carboxylesterase family	CL0028		CL0144	Periplas_BP	This clan includes proteins involved in chemotaxis, membrane transport of sugars and allocrites, and the LacI family transcriptional regulators. It also includes some antigenic basic membrane lipoproteins.	[1]. Crystal structure of the lactose operon repressor and its complexes with DNA and inducer. Lewis M, Chang G, Horton NC, Kercher MA, Pace HC, Schumacher MA, Brennan RG, Lu P Science 271, 1247-1254, (1996). PMID: 8638105	[2]. 1.7 A X-ray structure of the periplasmic ribose receptor from Escherichia coli. Mowbray SL, Cole LB J Mol Biol 225, 155-175, (1992). PMID: 1583688	[3]. Heterogeneity of BmpA (P39) among European isolates of Borrelia burgdorferi sensu lato and influence of interspecies variability on serodiagnosis. Roessler D, Hauser U, Wilske B J Clin Microbiol 35, 2752-2758, (1997). PMID: 9350727								IPR000048	Binding_site	IQ motif, EF-hand binding site				0	A0A024R163	PF11835		A0A024R3A8	CL0221		A0A024QZK9	IPR039497
A0A0D4WPX0	A0A0D4WPX0_HUMAN	ATP6	2	A0A023I7H5		A0A024R1Q3	C22orf18	Centromere protein M	1		PF00136	Family	DNA_pol_B	DNA polymerase family B	CL0194		CL0145	Golgi-transport	This clan contains families that are involved in intracellular transport and signalling. Arfaptins are proteins which interact with small GTPases involved in vesicular budding at the Golgi complex. They form an elongated dimer of three helix coiled coils and are structurally very similar to the BAR domain [1][2]. The Sec34 family is involved in tethering vesicles to the Golgi [3].	[1]. The structural basis of Arfaptin-mediated cross-talk between Rac and Arf signalling pathways. Tarricone C, Xiao B, Justin N, Walker PA, Rittinger K, Gamblin SJ, Smerdon SJ Nature 411, 215-219, (2001). PMID: 11346801	[2]. The BAR-domain family of proteins: a case of bending and binding?. Habermann B EMBO Rep 5, 250-255, (2004). PMID: 14993925	[3]. The Sec34/35 Golgi transport complex is related to the exocyst, defining a family of complexes involved in multiple steps of membrane traffic. Whyte JR, Munro S Dev Cell 1, 527-537, (2001). PMID: 11703943								IPR000222	Binding_site	PPM-type phosphatase, divalent cation binding				0	A0A024R163	PF13893		A0A024R3C2	CL0491		A0A024QZL0	IPR027953
A0A0D4WSH3	A0A0D4WSH3_HUMAN	ATP6	2	A0A023I7H5		A0A024R1R8	TMA7B	Translation machinery-associated protein 7B	1		PF00137	Family	ATP-synt_C	ATP synthase subunit C			CL0146	Herpes_glyco	This clan contains herpes envelope glycoproteins [1][2].	[1]. The UL49.5 gene of pseudorabies virus codes for an O-glycosylated structural protein of the viral envelope. Jons A, Granzow H, Kuchling R, Mettenleiter TC J Virol 70, 1237-1241, (1996). PMID: 8551587	[2]. gpUL73 (gN) genomic variants of human cytomegalovirus isolates are clustered into four distinct genotypes. Pignatelli S, Dal Monte P, Landini MP J Gen Virol 82, 2777-2784, (2001). PMID: 11602789									IPR000634	Binding_site	Serine/threonine dehydratase, pyridoxal-phosphate-binding site				0	A0A024R171	PF13873		A0A024R3C4	CL0113		A0A024QZL1	IPR007455
A0A0E3D7F5	A0A0E3D7F5_HUMAN	ATP6	2	A0A023I7H5		A0A024R1T2	KRTHA5	Keratin, hair, acidic, 5, isoform CRA_a	1		PF00139	Domain	Lectin_legB	Legume lectin domain	CL0004		CL0147	Traffic	The members of this clan are involved in protein trafficking. The Sec20 family are integral membrane proteins involved in ER to Golgi transport [1] and V-SNARES are involved in membrane fusion [2].	[1]. The Saccharomyces cerevisiae v-SNARE Vti1p is required for multiple membrane transport pathways to the vacuole. Fischer von Mollard G, Stevens TH Mol Biol Cell 10, 1719-1732, (1999). PMID: 10359592	[2]. The TIP1 gene of Saccharomyces cerevisiae encodes an 80 kDa cytoplasmic protein that interacts with the cytoplasmic domain of Sec20p. Sweet DJ, Pelham HR EMBO J 12, 2831-2840, (1993). PMID: 8334998									IPR001216	Binding_site	Cysteine synthase/cystathionine beta-synthase, pyridoxal-phosphate attachment site				0	A0A024R172	PF00107		A0A024R3C4	CL0159		A0A024QZM5	IPR003595
A0A0E3GNG5	A0A0E3GNG5_HUMAN	ATP6	2	A0A023I7H5		A0A024R1U9	G6PC	glucose-6-phosphatase, 3.1.3.9	2		PF00140	Family	Sigma70_r1_2	Sigma-70 factor, region 1.2			CL0148	Viral_Gag	This clan contains Gag proteins which are involved in viral assembly and replication [1][2].	[1]. Point mutations in the P30 domain of the gag gene of Moloney murine leukemia virus. Hsu HW, Schwartzberg P, Goff SP Virology 142, 211-214, (1985). PMID: 2414902	[2]. p24 antigen capture assay for quantification of human immunodeficiency virus using readily available inexpensive reagents. Wehrly K, Chesebro B Methods 12, 288-293, (1997). PMID: 9245608									IPR001431	Binding_site	Peptidase M16, zinc-binding site				0	A0A024R172	PF16884		A0A024R3F5	CL0361		A0A024QZM5	IPR029021
A0A0E3JPD9	A0A0E3JPD9_HUMAN	ATP6	2	A0A023I7H5		A0A024R1X2	WIRE	WIRE protein, isoform CRA_a	1		PF00141	Domain	peroxidase	Peroxidase	CL0617		CL0149	CoA-acyltrans	All characterised families in this clan are involved in CoA-dependent acyltransferase. All families have a characteristic HXXXD motif.											IPR001505	Binding_site	Copper centre Cu(A)				0	A0A024R183	PF00069		A0A024R3G4	CL0713		A0A024QZN6	IPR004181
A0A0E3T137	A0A0E3T137_HUMAN	ATP6	2	A0A023I7H5		A0A024R1X7	TMEM99	Transmembrane protein 99, isoform CRA_a	1		PF00142	Domain	Fer4_NifH	4Fe-4S iron sulfur cluster binding proteins, NifH/frxC family	CL0023		CL0151	PK_TIM	This superfamily consists of a number of TIM barrel domains found in enzymes such as pyruvate kinase, malate synthase and citrate lyase.											IPR001882	Binding_site	Biotin-binding site				0	A0A024R183	PF12330		A0A024R3G7	CL0016		A0A024QZN6	IPR013083
A0A0E3X754	A0A0E3X754_HUMAN	ATP6	2	A0A023I7H5		A0A024R1Y5	LGP2	RNA helicase, 3.6.4.13	3		PF00143	Domain	Interferon	Interferon alpha/beta domain	CL0053		CL0153	dUTPase	This clan contains dUTPase and many viral proteins that appear to be related. dUTPases are important in virus replication.											IPR001917	Binding_site	Aminotransferase, class-II, pyridoxal-phosphate binding site				0	A0A024R187	PF04794		A0A024R3H3	CL0029		A0A024QZN6	IPR040797
A0A0E3X7Q1	A0A0E3X7Q1_HUMAN	ATP6	2	A0A023I7H5		A0A024R1Y7	LGP1	Homolog of mouse LGP1, isoform CRA_a	1		PF00144	Domain	Beta-lactamase	Beta-lactamase	CL0013		CL0154	C2	This superfamily includes C2 domains and C2-like domains.	[1]. Extending the C2 domain family: C2s in PKCs delta, epsilon, eta, theta, phospholipases, GAPs, and perforin. Ponting CP, Parker PJ Protein Sci 5, 162-166, (1996). PMID: 8771209	[2]. Identification of novel families and classification of the C2 domain superfamily elucidate the origin and evolution of membrane targeting activities in eukaryotes. Zhang D, Aravind L Gene. 469, 18-30, (2010). PMID: 20713135									IPR002226	Binding_site	Catalase haem-binding site				0	A0A024R1A2	PF10513		A0A024R3H3	CL0128		A0A024QZN7	IPR018967
A0A0G2T4D3	A0A0G2T4D3_HUMAN	ATP6	2	A0A023I7H5		A0A024R1Z9	ATHL1	ATH1, acid trehalase-like 1 (Yeast), isoform CRA_a, Testicular tissue protein Li 25	1		PF00145	Domain	DNA_methylase	C-5 cytosine-specific DNA methylase	CL0063		CL0155	CBM_14_19	This clan includes two different carbohydrate binding modules.	[1]. Chitin-binding proteins in invertebrates and plants comprise a common chitin-binding structural motif. Suetake T, Tsuda S, Kawabata S, Miura K, Iwanaga S, Hikichi K, Nitta K, Kawano K J Biol Chem 275, 17929-17932, (2000). PMID: 10770921										IPR002355	Binding_site	Multicopper oxidase, copper-binding site				0	A0A024R1A2	PF13831		A0A024R3K1	CL0011		A0A024QZN7	IPR019610
A0A0K1HQC4	A0A0K1HQC4_HUMAN	ATP6	2	A0A023I7H5		A0A024R216	HDGFRP3	Hepatoma-derived growth factor, related protein 3, isoform CRA_a	2		PF00146	Family	NADHdh	NADH dehydrogenase	CL0425		CL0156	Nucleocapsid	This clan contains paramyxoviral and ebola type virus nucleocapsid proteins.											IPR003016	Binding_site	2-oxo acid dehydrogenase, lipoyl-binding site				0	A0A024R1A2	PF13832		A0A024R3L5	CL0126		A0A024QZN7	IPR042216
A0A0K1HR82	A0A0K1HR82_HUMAN	ATP6	2	A0A023I7H5		A0A024R219	ZA20D2	Zinc finger, A20 domain containing 2, isoform CRA_a	2		PF00147	Domain	Fibrinogen_C	Fibrinogen beta and gamma chains, C-terminal globular domain	CL0422		CL0157	Kleisin	The kleisin superfamily includes ScpA, Scc1, Rec8, and Barren [1]. Scc1 interacts with SMC proteins through N- and C-terminal domains to form a ring-like structure [1].	[1]. Kleisins: a superfamily of bacterial and eukaryotic SMC protein partners. Schleiffer A, Kaitna S, Maurer-Stroh S, Glotzer M, Nasmyth K, Eisenhaber F Mol Cell 11, 571-575, (2003). PMID: 12667442										IPR003952	Binding_site	Fumarate reductase/succinate dehydrogenase, FAD-binding site				0	A0A024R1A3	PF00899		A0A024R3L5	CL0466		A0A024QZN7	IPR045131
A0A0N6YMF5	A0A0N6YMF5_HUMAN	ATP6	2	A0A023I7H5		A0A024R220	KIAA0367	KIAA0367, isoform CRA_b	1		PF00148	Domain	Oxidored_nitro	Nitrogenase component 1 type Oxidoreductase	CL0043		CL0158	GH_CE	This superfamily contains diverse enzymes that act on carbohydrates including both hydrolases and deacetylases.											IPR004035	Binding_site	Endonuclease III, iron-sulphur binding site				0	A0A024R1A3	PF09358		A0A024R3L8	CL0085		A0A024QZP0	IPR001878
A0A0N6YMR1	A0A0N6YMR1_HUMAN	ATP6	2	A0A023I7H5		A0A024R228	HNRPK	Heterogeneous nuclear ribonucleoprotein K	2		PF00149	Domain	Metallophos	Calcineurin-like phosphoesterase	CL0163		CL0159	E-set	This clan includes a diverse range of domains that have an Ig-like fold and appear to be distantly related to each other. The clan includes: PKD domains, cadherins and several families of bacterial Ig-like domains as well as viral tail fibre proteins. it also includes several Fibronectin type III domain-containing families.	The selected clan has 257 member entries. Displaying more than 100 nodes in this visualisation can affect the performance of your browser.Visualise it										IPR004163	Binding_site	Coenzyme A transferase binding site				0	A0A024R1A3	PF10585		A0A024R3N1	CL0010		A0A024QZP0	IPR025829
A0A0N7APK3	A0A0N7APK3_HUMAN	ATP6	2	A0A023I7H5		A0A024R229	TMEM2	hyaluronoglucosaminidase, 3.2.1.35	3		PF00150	Domain	Cellulase	Cellulase (glycosyl hydrolase family 5)	CL0058		CL0160	Methionine_synt	The N-terminal and C-terminal cobalamin-independent synthase domains are structurally similar, adopting a TIM beta/alpha barrel. However, the two domain perform functionally different roles. The N-terminal domain and C-terminal domains both define a catalytic cleft in the enzyme. The N-terminal domain is thought to bind the substrate, in particular, the negatively charged polyglutamate chain. The…	[1]. Crystal structures of cobalamin-independent methionine synthase complexed with zinc, homocysteine, and methyltetrahydrofolate. Ferrer JL, Ravanel S, Robert M, Dumas R J Biol Chem 279, 44235-44238, (2004). PMID: 15326182										IPR004838	Binding_site	Aminotransferases, class-I, pyridoxal-phosphate-binding site				0	A0A024R1A3	PF16190		A0A024R3N1	CL0409		A0A024QZP0	IPR027377
A0A0N9Q9K1	A0A0N9Q9K1_HUMAN	ATP6	2	A0A023I7H5		A0A024R235	ZCCHC6	RNA uridylyltransferase, 2.7.7.52	2		PF00151	Domain	Lipase	Lipase	CL0028		CL0161	GAF	A clan of related transcriptional regulator domains.											IPR006058	Binding_site	2Fe-2S ferredoxin, iron-sulphur binding site				0	A0A024R1A3	PF16191		A0A024R3N9	CL0058		A0A024QZP0	IPR033446
A0A0R4PX07	A0A0R4PX07_HUMAN	ATP6	2	A0A023I7H5		A0A024R244	SYK	Tyrosine-protein kinase, 2.7.10.2	5		PF00152	Domain	tRNA-synt_2	tRNA synthetases class II (D, K and N)	CL0040		CL0162	FBA	Clan containing related F-box associated families.											IPR006066	Binding_site	Nitrite/sulphite reductase iron-sulphur/sirohaem-binding site				0	A0A024R1B8	PF09778		A0A024R3U2	CL0126		A0A024QZP0	IPR036875
A0A0R4Q8V5	A0A0R4Q8V5_HUMAN	ATP6	2	A0A023I7H5		A0A024R247	C9orf103	gluconokinase, 2.7.1.12, Gluconate kinase	2		PF00153	Repeat	Mito_carr	Mitochondrial carrier protein			CL0163	Calcineurin	This clan contains the calcineurin-like phosphoesterases. This clan also includes the apparently inactive homologues from the small DNA polymerase subunits [1].	[1]. Phosphoesterase domains associated with DNA polymerases of diverse origins. Aravind L, Koonin EV Nucleic Acids Res 26, 3746-3752, (1998). PMID: 9685491										IPR006093	Binding_site	Oxygen oxidoreductase covalent FAD-binding site				0	A0A024R1C5	PF15810		A0A024R3X5	CL0236		A0A024QZP6	IPR002119
A0A0R4QEB8	A0A0R4QEB8_HUMAN	ATP6	2	A0A023I7H5		A0A024R248	C9orf89	Chromosome 9 open reading frame 89, isoform CRA_b	1		PF00154	Family	RecA	recA bacterial DNA recombination protein	CL0023		CL0164	CUB	This clan contains the CUB domain [1,2].	[1]. The CUB domain. A widespread module in developmentally regulated proteins. Bork P, Beckmann G J Mol Biol 231, 539-545, (1993). PMID: 8510165	[2]. The crystal structures of two spermadhesins reveal the CUB domain fold. Romero A, Romao MJ, Varela PF, Kolln I, Dias JM, Carvalho AL, Sanz L, Topfer-Petersen E, Calvete JJ Nat Struct Biol 4, 783-788, (1997). PMID: 9334740									IPR006184	Binding_site	6-phosphogluconate-binding site				0	A0A024R1C8	PF00071		A0A024R3Z4	CL0361		A0A024QZP6	IPR002589
A0A0R4QFZ3	A0A0R4QFZ3_HUMAN	ATP6	2	A0A023I7H5		A0A024R259	KIAA0427	KIAA0427, isoform CRA_a	1		PF00155	Domain	Aminotran_1_2	Aminotransferase class I and II	CL0061		CL0165	Cache	The Cache domain an extracellular domain that is thought to have a role in small-molecule recognition in a wide range of proteins, including the animal Ca(2+)-channel subunits and a class of prokaryotic chemotaxis receptors [1]. It is homologous to, but sufficiently different from the most common intracellular sensor module, the PAS domain. Furthermore, it is suggested that it might have originat…	[1]. Cache - a signaling domain common to animal Ca(2+)-channel subunits and a class of prokaryotic chemotaxis receptors. Anantharaman V, Aravind L Trends Biochem Sci 25, 535-537, (2000). PMID: 11084361	[2]. Cache Domains That are Homologous to, but Different from PAS Domains Comprise the Largest Superfamily of Extracellular Sensors in Prokaryotes. Upadhyay AA, Fleetwood AD, Adebali O, Finn RD, Zhulin IB (). PMID: 27049771									IPR013516	Binding_site	Phytochrome chromophore binding site				0	A0A024R1D4	PF15229		A0A024R402	CL0063		A0A024QZP6	IPR007125
A0A0R4QGQ9	A0A0R4QGQ9_HUMAN	ATP6	2	A0A023I7H5		A0A024R282	ANKRD19	Ankyrin repeat domain 19, isoform CRA_a	1		PF00156	Domain	Pribosyltran	Phosphoribosyl transferase domain	CL0533		CL0166	PRD	The PRD domain (for PTS Regulation Domain), is the phosphorylatable regulatory domain found in bacterial transcriptional antiterminator of the BglG family as well as in activators such as MtlR and LevR. The PRD domain is phosphorylated on a conserved histidine residue. PRD-containing proteins are involved in the regulation of catabolic operons in Gram+ and Gram- bacteria and are often characteris…											IPR013838	Binding_site	Beta tubulin, autoregulation binding site				0	A0A024R1D8	PF00069		A0A024R403	CL0029		A0A024QZP6	IPR009072
A0A0R4QTT8	A0A0R4QTT8_HUMAN	ATP6	2	A0A023I7H5		A0A024R292	FVT1	3-dehydrosphinganine reductase, 1.1.1.102	2		PF00157	Domain	Pou	Pou domain - N-terminal to homeobox domain	CL0123		CL0167	Zn_Beta_Ribbon	A clan of zinc-binding ribbon domains.	[1]. C-terminal domains of Escherichia coli topoisomerase I belong to the zinc-ribbon superfamily. Grishin NV J Mol Biol 299, 1165-1177, (2000). PMID: 10873443										IPR015881	Binding_site	Aromatic-ring-hydroxylating dioxygenase, 2Fe-2S-binding site				0	A0A024R1D8	PF00169		A0A024R432	CL0065		A0A024QZP6	IPR021171
A0A0R4RE81	A0A0R4RE81_HUMAN	ATP6	2	A0A023I7H5		A0A024R294	C18orf24	Spindle and kinetochore-associated protein 1	3		PF00158	Domain	Sigma54_activat	Sigma-54 interaction domain	CL0023		CL0168	PAN	PAN domains have significant functional versatility fulfilling diverse biological functions by mediating protein-protein or protein-carbohydrate interactions [1]. These domains contain a hair-pin loop like structure, similar to knottins, but the pattern of disulphide bonds differs.	[1]. The PAN module: the N-terminal domains of plasminogen and hepatocyte growth factor are homologous with the apple domains of the prekallikrein family and with a novel domain found in numerous nematode proteins. Tordai H, Banyai L, Patthy L FEBS Lett 461, 63-67, (1999). PMID: 10561497										IPR015887	Binding_site	DNA glycosylase/AP lyase, zinc finger domain, DNA-binding site				0	A0A024R1D8	PF00615		A0A024R4A5	CL0673		A0A024QZP6	IPR032454
A0A0R4RET0	A0A0R4RET0_HUMAN	ATP6	2	A0A023I7H5		A0A024R297	SPIN	Spindlin, isoform CRA_a	2		PF00159	Family	Hormone_3	Pancreatic hormone peptide			CL0169	Rep	This clan includes replication proteins for viruses and plasmids. This domain is known to bind DNA. The members of this clan have three motifs. The central HXH is conserved in most families in the clan.											IPR016131	Binding_site	Haemerythrin, iron-binding site				0	A0A024R1E4	PF10558		A0A024R4B5	CL0317		A0A024QZP6	IPR035796
A0A0R4RTL7	A0A0R4RTL7_HUMAN	ATP6	2	A0A023I7H5		A0A024R2A8	MAGED4	Melanoma antigen family D, 4, isoform CRA_d	1		PF00160	Domain	Pro_isomerase	Cyclophilin type peptidyl-prolyl cis-trans isomerase/CLD	CL0475		CL0170	Peptidase_MD	This clan is comprised of carboxypeptidases and the N-terminal domain from Sonic hedgehog proteins. The structure of the latter is similar to the peptidases, but the N-terminal domain of hedgehog has been demonstrate not to be involved in peptidase activity, but is more likely involved in signal transduction [1].	[1]. Sonic hedgehog protein signals not as a hydrolytic enzyme but as an apparent ligand for patched. Fuse N, Maiti T, Wang B, Porter JA, Hall TM, Leahy DJ, Beachy PA Proc Natl Acad Sci U S A 96, 10992-10999, (1999). PMID: 10500113										IPR016192	Binding_site	APOBEC/CMP deaminase, zinc-binding				0	A0A024R1H0	PF13738		A0A024R4F1	CL0227		A0A024QZP6	IPR043472
A0A0R4RWH1	A0A0R4RWH1_HUMAN	ATP6	2	A0A023I7H5		A0A024R2B0	KIAA1468	KIAA1468, isoform CRA_b	1		PF00161	Domain	RIP	Ribosome inactivating protein			CL0171	Phospoesterase	Members of this clan show metal-dependent / lithium sensitive phosphomonoesterase activity. The clan includes inositol polyphosphate 1 phosphatase and fructose 1,6-bisphosphatase [1].	[1]. Definition of a metal-dependent/Li(+)-inhibited phosphomonoesterase protein family based upon a conserved three-dimensional core structure. York JD, Ponder JW, Majerus PW Proc Natl Acad Sci U S A 92, 5149-5153, (1995). PMID: 7761465										IPR017441	Binding_site	Protein kinase, ATP binding site				0	A0A024R1H1	PF08806		A0A024R4F1	CL0256		A0A024QZP9	IPR037394
A0A0R6NAJ0	A0A0R6NAJ0_HUMAN	ATP6	2	A0A023I7H5		A0A024R2D2	C3orf32	Chromosome 3 open reading frame 32, isoform CRA_a	1		PF00162	Domain	PGK	Phosphoglycerate kinase			CL0172	Thioredoxin	This clan contains families related to the thioredoxin family. Thioredoxins are small enzymes that are involved in redox reactions via the reversible oxidation of an active centre disulfide bond. The thioredoxin fold consists of a 3 layer alpha/beta/alpha sandwich and a central beta sheet.	[1]. Structural classification of thioredoxin-like fold proteins. Qi Y, Grishin NV Proteins 58, 376-388, (2005). PMID: 15558583										IPR017947	Binding_site	Aryldialkylphosphatase, zinc-binding site				0	A0A024R1J8	PF00373		A0A024R4J0	CL0361		A0A024QZQ1	IPR003000
A0A0S1S5W2	A0A0S1S5W2_HUMAN	ATP6	2	A0A023I7H5		A0A024R2D7	TADA3L	Transcriptional adapter 3, ADA3 homolog, Transcriptional adapter 3-like	2		PF00163	Family	Ribosomal_S4	Ribosomal protein S4/S9 N-terminal domain	CL0492		CL0173	STIR	Both members of this clan are thought to be involved in TOLL/IL1R-like pathways, by mediating protein-protein interactions between pathway components. The N-termini of SEFIR and TIR domains are similar, but the domains are more divergent towards the C-terminus [1].	[1]. The STIR-domain superfamily in signal transduction, development and immunity. Novatchkova M, Leibbrandt A, Werzowa J, Neubuser A, Eisenhaber F Trends Biochem Sci 28, 226-229, (2003). PMID: 12765832										IPR018064	Binding_site	Metallothionein, vertebrate, metal binding site				0	A0A024R1J8	PF00769		A0A024R4P3	CL0192		A0A024QZQ1	IPR026590
A0A0S1VVC4	A0A0S1VVC4_HUMAN	ATP6	2	A0A023I7H5		A0A024R2J4	SGOL1	Shugoshin-like 1 (S. pombe), isoform CRA_b	2		PF00164	Family	Ribosom_S12_S23	Ribosomal protein S12/S23	CL0021		CL0174	TetR_C	This clan features families of transcriptional regulators for multidrug efflux pumps, which belong to the TetR superfamily. They are induced by the presence of a variety of factors, such as antibiotics or organic solvents. The C-terminal region featured in these families is thought to contain the inducer-binding site; the divergent sequences in this region allow for the binding of a variety of di…	[1]. Efflux-mediated antiseptic resistance gene qacA from Staphylococcus aureus: common ancestry with tetracycline- and sugar-transport proteins. Rouch DA, Cram DS, DiBerardino D, Littlejohn TG, Skurray RA Mol Microbiol 4, 2051-2062, (1990). PMID: 2089219	[2]. QacR is a repressor protein that regulates expression of the Staphylococcus aureus multidrug efflux pump QacA. Grkovic S, Brown MH, Roberts NJ, Paulsen IT, Skurray RA J Biol Chem 273, 18665-18673, (1998). PMID: 9660841	[3]. Structural biology of bacterial multidrug resistance gene regulators. Godsey MH, Zheleznova Heldwein EE, Brennan RG J Biol Chem 277, 40169-40172, (2002). PMID: 12186881	[4]. Mechanisms underlying expression of Tn10 encoded tetracycline resistance. Hillen W, Berens C Annu Rev Microbiol 48, 345-369, (1994). PMID: 7826010							IPR018136	Binding_site	Aconitase family, 4Fe-4S cluster binding site				0	A0A024R1J8	PF09379		A0A024R4R6	CL0148		A0A024QZQ1	IPR026591
A0A0S3CR60	A0A0S3CR60_HUMAN	ATP6	2	A0A023I7H5		A0A024R2P4	C3orf39	Protein O-linked-mannose beta-1,4-N-acetylglucosaminyltransferase 2, 2.4.1.312, Extracellular O-linked N-acetylglucosamine transferase-like, Glycosyltransferase-like domain-containing protein 2	2		PF00165	Domain	HTH_AraC	Bacterial regulatory helix-turn-helix proteins, AraC family	CL0123		CL0175	TRASH	TRASH-like domains contain well-conserved cysteine residues that are thought to be involved in metal coordination. These domains are thus expected to be involved in metal trafficking and heavy-metal resistance. It has been suggested that the members adopt a 'treble-clef' fold, with 3/4 beta strands preceding a C-terminal alpha helix [1].	[1]. TRASH: a novel metal-binding domain predicted to be involved in heavy-metal sensing, trafficking and resistance. Ettema TJ, Huynen MA, de Vos WM, van der Oost J Trends Biochem Sci 28, 170-173, (2003). PMID: 12713899										IPR018152	Binding_site	Superoxide dismutase, copper/zinc, binding site				0	A0A024R1J8	PF09380		A0A024R4R6	CL0361		A0A024QZQ1	IPR029035
A0A0S3IUU7	A0A0S3IUU7_HUMAN	ATP6	2	A0A023I7H5		A0A024R2Q1	SEC22L3	SEC22 vesicle trafficking protein-like 3 (S. cerevisiae), isoform CRA_a	1		PF00166	Domain	Cpn10	Chaperonin 10 Kd subunit	CL0296		CL0176	Chemosens_recp	The members of this clan are families of various gustatory and odorant receptors. They are described as being seven-transmembrane receptors, and in fact all show characteristic regions of hydrophobicity on the alignment.											IPR018194	Binding_site	Nickel-dependent hydrogenase, large subunit, nickel binding site				0	A0A024R1J8	PF20492		A0A024R4S4	CL0361		A0A024QZR9	IPR013057
A0A0X8DB89	A0A0X8DB89_HUMAN	ATP6	2	A0A023I7H5		A0A024R2Q3	CTNNB1	Catenin (Cadherin-associated protein), beta 1, 88kDa, isoform CRA_a	5		PF00167	Domain	FGF	Fibroblast growth factor	CL0066		CL0177	PBP	Periplasmic binding proteins (PBPs) consist of two large lobes that close around the bound ligand. This architecture is reiterated in transcriptional regulators, such as the lac repressors. In the process of evolution, genes encoding the PBPs have fused with genes for integral membrane proteins. Thus, diverse mammalian receptors contain extracellular ligand binding domains that are homologous to …	[1]. Structural, functional, and evolutionary relationships among extracellular solute-binding receptors of bacteria. Tam R, Saier MH Jr Microbiol Rev 57, 320-346, (1993). PMID: 8336670	[2]. The Venus flytrap of periplasmic binding proteins: an ancient protein module present in multiple drug receptors. Felder CB, Graul RC, Lee AY, Merkle HP, Sadee W (). PMID: 11741199									IPR018195	Binding_site	Transferrin family, iron binding site				0	A0A024R1L3	PF20266		A0A024R4S6	CL0148		A0A024QZS2	IPR021082
A0A0Y0GJV2	A0A0Y0GJV2_HUMAN	ATP6	2	A0A023I7H5		A0A024R2R3	GUP1	GUP1, glycerol uptake/transporter homolog (Yeast), isoform CRA_a	1		PF00168	Domain	C2	C2 domain	CL0154		CL0178	PUA	This clan consists of the RNA binding PUA domain and ASCH domain. It also contains uncharacterised protein families.	[1]. Crystal structure of archaeosine tRNA-guanine transglycosylase. Ishitani R, Nureki O, Fukai S, Kijimoto T, Nameki N, Watanabe M, Kondo H, Sekine M, Okada N, Nishimura S, Yokoyama S J Mol Biol 318, 665-677, (2002). PMID: 12054814	[2]. The ASCH superfamily: novel domains with a fold related to the PUA domain and a potential role in RNA metabolism. Iyer LM, Burroughs AM, Aravind L (). PMID: 16322048									IPR018220	Binding_site	Adenylosuccinate synthase, GTP-binding site				0	A0A024R1L5	PF03619		A0A024R4S6	CL0361		A0A024QZS3	IPR000326
A0A109QFB8	A0A109QFB8_HUMAN	ATP6	2	A0A023I7H5		A0A024R2R9	C3orf23	Chromosome 3 open reading frame 23, isoform CRA_a	1		PF00169	Domain	PH	PH domain	CL0266		CL0179	ATP-grasp	The ATP-grasp domain is found in a wide variety of carboxylate-amine/thiol ligases [1]. It is composed of two subdomains, with ATP being bound in the cleft between the two.	[1]. A diverse superfamily of enzymes with ATP-dependent carboxylate-amine/thiol ligase activity. Galperin MY, Koonin EV Protein Sci 6, 2639-2643, (1997). PMID: 9416615										IPR018229	Binding_site	Rhodopsin, retinal binding site				0	A0A024R1M3	PF00051		A0A024R4T0	CL0148		A0A024QZS3	IPR036938
A0A140DFM4	A0A140DFM4_HUMAN	ATP6	2	A0A023I7H5		A0A024R2S0	TMEM16K	Anoctamin	2		PF00170	Coiled-coil	bZIP_1	bZIP transcription factor	CL0018		CL0181	ABC-2	These families are similar to the ABC-2 transporter subfamily, as described in [1] (Pfam:PF01061). Members of this family are involved in drug transport and resistance. CcmB protein family (Pfam:PF03379) members are also transporters; they are required for haem export into the periplasm [2].	[1]. A new subfamily of bacterial ABC-type transport systems catalyzing export of drugs and carbohydrates. Reizer J, Reizer A, Saier MH Jr Protein Sci 1, 1326-1332, (1992). PMID: 1303751	[2]. Escherichia coli genes required for cytochrome c maturation. Thony-Meyer L, Fischer F, Kunzler P, Ritz D, Hennecke H J Bacteriol 177, 4321-4326, (1995). PMID: 7635817									IPR018246	Binding_site	AP endonuclease 2, zinc binding site				0	A0A024R1M5	PF00096		A0A024R4T8	CL0033		A0A024QZS3	IPR043216
A0A140DII8	A0A140DII8_HUMAN	ATP6	2	A0A023I7H5		A0A024R2S8	SCOTIN	Scotin, isoform CRA_a	1		PF00171	Family	Aldedh	Aldehyde dehydrogenase family	CL0099		CL0182	IT	This superfamily of secondary carriers specific for cationic and anionic compounds, has been termed the ion transporter (IT) superfamily [1].	[1]. The ion transporter superfamily. Prakash S, Cooper G, Singhi S, Saier MH Jr Biochim Biophys Acta 1618, 79-92, (2003). PMID: 14643936										IPR018247	Binding_site	EF-Hand 1, calcium-binding site				0	A0A024R1M5	PF00651		A0A024R4T8	CL0361		A0A024QZU5	IPR000582
A0A141ZQA4	A0A141ZQA4_HUMAN	ATP6	2	A0A023I7H5		A0A024R2T8	ENDOGL1	Endonuclease G-like 1, isoform CRA_b	1		PF00172	Domain	Zn_clus	Fungal Zn(2)-Cys(6) binuclear cluster domain			CL0183	PAS_Fold	This clan contains PAS domains that are found in a wide variety of bacterial signaling proteins.	[1]. PAS domain S-boxes in archaea, bacteria and sensors for oxygen and redox. Zhulin IB, Taylor BL, Dixon R Trends Biochem Sci 22, 331-333, (1997). PMID: 9301332	[2]. 1.4 A structure of photoactive yellow protein, a cytosolic photoreceptor: unusual fold, active site, and chromophore. Borgstahl GE, Williams DR, Getzoff ED Biochemistry 34, 6278-6287, (1995). PMID: 7756254	[3]. PAS: a multifunctional domain family comes to light. Ponting CP, Aravind L Curr Biol 7, 674-677, (1997). PMID: 9382818	[4]. The PAS fold: a redefination of the PAS domain based upon structural prediction. Hefti MH, Francoijs KJ, de Vries SC, Dixon R, Vervoort J Eur J Biochem 271, 1198-1208, (2004). PMID: 15009198							IPR018298	Binding_site	Adrenodoxin, iron-sulphur binding site				0	A0A024R1M5	PF13894		A0A024R4V3	CL0085		A0A024QZU5	IPR001753
A0A141ZRP8	A0A141ZRP8_HUMAN	ATP6	2	A0A023I7H5		A0A024R2U8	AXUD1	AXIN1 up-regulated 1, isoform CRA_a	2		PF00173	Domain	Cyt-b5	Cytochrome b5-like Heme/Steroid binding domain			CL0184	DMT	This clan contains a variety of transporters which have 4, 5, 9 or 10 membrane spanning helices. Many of the 10 membrane spanning transporters appear to be a duplication of the 5 spanning unit [1]. Many of these families contain a characteristic glycine rich motif close to the C-terminus.	[1]. The drug/metabolite transporter superfamily. Jack DL, Yang NM, Saier MH Jr Eur J Biochem 268, 3620-3639, (2001). PMID: 11432728	[2]. Functional specialization in nucleotide sugar transporters occurred through differentiation of the gene cluster EamA (DUF6) before the radiation of Viridiplantae. Vastermark A, Almen MS, Simmen MW, Fredriksson R, Schioth HB (). PMID: 21569384									IPR018301	Binding_site	Aromatic amino acid hydroxylase, iron/copper binding site				0	A0A024R1M5	PF13912		A0A024R500	CL0572		A0A024QZU5	IPR014352
A0A141ZRV0	A0A141ZRV0_HUMAN	ATP6	2	A0A023I7H5		A0A024R2X2	IHPK1	Kinase, 2.7.-.-	3		PF00174	Domain	Oxidored_molyb	Oxidoreductase molybdopterin binding domain	CL0072		CL0186	Beta_propeller	This large clan contains proteins that contain beta propellers. These are composed of between 6 and 8 repeats. The individual repeats are composed of a four stranded sheet. The clan includes families such as WD40 Pfam:PF00400 where the individual repeats are modeled. The clan also includes families where the entire propeller is modeled such as Pfam:PF02239 usually because the individual repeats a…	[1]. Structural principles for the propeller assembly of beta-sheets: the preference for seven-fold symmetry. Murzin AG Proteins. 14, 191-201, (1992). PMID: 1409568										IPR018349	Binding_site	Peptidase M24A, methionine aminopeptidase, subfamily 2, binding site				0	A0A024R1M5	PF16637		A0A024R518	CL0066		A0A024QZU5	IPR014748
A0A141ZTF9	A0A141ZTF9_HUMAN	ATP6	2	A0A023I7H5		A0A024R328	PRKCD	Protein kinase C delta type, 2.7.11.13, nPKC-delta	5		PF00175	Domain	NAD_binding_1	Oxidoreductase NAD-binding domain	CL0091		CL0187	LysM	The LysM domain (Pfam:PF01476) is thought to be a general peptidoglycan-binding module. Although originally described in bacterial proteins, it has been also found in some eukaryotic sequences. It takes up a beta-alpha-alpha-beta conformation, with the beta strands forming an antiparallel beta sheet and the two alpha helices packing on one side of this sheet [1].	[1]. The structure of a LysM domain from E. coli membrane-bound lytic murein transglycosylase D (MltD). Bateman A, Bycroft M J Mol Biol 299, 1113-1119, (2000). PMID: 10843862										IPR018506	Binding_site	Cytochrome b5, heme-binding site				0	A0A024R1M6	PF09805		A0A024R529	CL0245		A0A024QZU5	IPR022408
A0A143FYL2	A0A143FYL2_HUMAN	ATP6	2	A0A023I7H5		A0A024R330	C3orf14	Chromosome 3 open reading frame 14, isoform CRA_a	1		PF00176	Domain	SNF2-rel_dom	SNF2-related domain	CL0023		CL0188	CH	The calponin homology (CH) domain is found in a variety of contexts, ranging from proteins involved in signalling pathways to cytoskeletal proteins. They seem to have diverse cellular functions, which are thought to include actin binding, involvement in the MAP kinase signalling pathway, and regulation of GEF activity in Rho family GTPase pathways. Structurally, they are organised into three laye…	[1]. Functional plasticity of CH domains. Gimona M, Djinovic-Carugo K, Kranewitter WJ, Winder SJ FEBS Lett 513, 98-106, (2002). PMID: 11911887										IPR018527	Binding_site	Rubredoxin, iron-binding site				0	A0A024R1P7	PF07738		A0A024R539	CL0072		A0A024QZU5	IPR029045
A0A143FYN5	A0A143FYN5_HUMAN	ATP6	2	A0A023I7H5		A0A024R332	NIF3L1BP1	THO complex subunit 7 homolog	2		PF00177	Domain	Ribosomal_S7	Ribosomal protein S7p/S5e			CL0190	HSP20	The small heat shock proteins (sHSPs) prevent protein aggregation during heat shock and oppose regulated cell death. A conserved arginine residue in the HSP20/alpha-crystallin domain (Pfam:PF00011) has in fact been implicated in the development of cataracts and myopathies [1]. The CS family (Pfam:PF04969) includes proteins that are known to bind HSP90 [2], as well as p23 (Swiss:Q15185), which is …	[1]. Crystal structure and assembly of a eukaryotic small heat shock protein. van Montfort RL, Basha E, Friedrich KL, Slingsby C, Vierling E Nat Struct Biol 8, 1025-1030, (2001). PMID: 11702068	[2]. Human Sgt1 binds HSP90 through the CHORD-Sgt1 domain and not the tetratricopeptide repeat domain. Lee YT, Jacob J, Michowski W, Nowotny M, Kuznicki J, Chazin WJ J Biol Chem 279, 16511-16517, (2004). PMID: 14761955	[3]. Crystal structure and activity of human p23, a heat shock protein 90 co-chaperone. Weaver AJ, Sullivan WP, Felts SJ, Owen BA, Toft DO J Biol Chem 275, 23045-23052, (2000). PMID: 10811660								IPR019780	Binding_site	Germin, manganese binding site				0	A0A024R1P7	PF18580		A0A024R539	CL0214		A0A024QZU5	IPR035984
A0A143FYU0	A0A143FYU0_HUMAN	ATP6	2	A0A023I7H5		A0A024R333	TMEM113	Transmembrane protein 113, isoform CRA_a	2		PF00178	Domain	Ets	Ets-domain	CL0123		CL0191	POTRA	The polypeptide-transport-associated (POTRA) domain is predicted to be organised into three beta-strands and two alpha helices, the latter being found between strands 2 and 3. It is usually found associated with a beta-barrel outer membrane domain. It is thought to have a chaperone-like function; the proteins it is found in are involved in processes as diverse as bacterial septation and protein t…	[1]. POTRA: a conserved domain in the FtsQ family and a class of beta-barrel outer membrane proteins. Sanchez-Pulido L, Devos D, Genevrois S, Vicente M, Valencia A Trends Biochem Sci 28, 523-526, (2003). PMID: 14559180										IPR019789	Binding_site	Xylulose 5-phosphate/Fructose 6-phosphate phosphoketolase, thiamine diphosphate binding site				0	A0A024R1Q3	PF11111		A0A024R561	CL0125		A0A024QZX9	IPR002921
A0A143FZ00	A0A143FZ00_HUMAN	ATP6	2	A0A023I7H5		A0A024R355	THEX1	Three prime histone mRNA exonuclease 1, isoform CRA_b	1		PF00179	Domain	UQ_con	Ubiquitin-conjugating enzyme	CL0208		CL0192	GPCR_A	This clan contains various seven-transmembrane receptors and related proteins. A major member is Pfam:PF00001, members of which have been considered to be typical members of the rhodopsin superfamily. Many members of this clan are Caenorhabditis proteins, suggesting great expansion of the relevant families in these nematode worms.											IPR019793	Binding_site	Peroxidases heam-ligand binding site				0	A0A024R1R8	PF09072		A0A024R565	CL0167		A0A024QZX9	IPR029058
A0A167L959	A0A167L959_HUMAN	ATP6	2	A0A023I7H5		A0A024R363	C3orf63	Chromosome 3 open reading frame 63, isoform CRA_b	1		PF00180	Domain	Iso_dh	Isocitrate/isopropylmalate dehydrogenase	CL0270		CL0193	MBB	This clan gathers together a large set of beta barrel membrane proteins.Although these proteins have different numbers of beta strands in the barrel they have significant sequence similarity between families.	The selected clan has 117 member entries. Displaying more than 100 nodes in this visualisation can affect the performance of your browser.Visualise it										IPR019798	Binding_site	Serine hydroxymethyltransferase, pyridoxal phosphate binding site				0	A0A024R1T2	PF00038		A0A024R589	CL0145		A0A024QZY1	IPR004046
A0A1B0VY34	A0A1B0VY34_HUMAN	ATP6	2	A0A023I7H5		A0A024R369	FAM19A4	Family with sequence similarity 19 (Chemokine (C-C motif)-like), member A4, isoform CRA_a	2		PF00181	Domain	Ribosomal_L2	Ribosomal Proteins L2, RNA binding domain	CL0021		CL0194	DNA_pol_B-like	DNA polymerases replicate DNA by adding nucleotide triphosphate (dNTP) residues to the 5'-end of a growing chain of DNA. They use a complementary DNA chain as a template.`	[1]. Crystallization and preliminary diffraction analysis of a hyperthermostable DNA polymerase from a Thermococcus archaeon. Zhou M, Mao C, Rodriguez AC, Kiefer JR, Kucera RB, Beese LS Acta Crystallogr D Biol Crystallogr 54, 994-995, (1998). PMID: 9757117										IPR019807	Binding_site	Hexokinase, binding site				0	A0A024R1U9	PF01569		A0A024R597	CL0049		A0A024QZY1	IPR031889
A0A1B0VYI1	A0A1B0VYI1_HUMAN	ATP6	2	A0A023I7H5		A0A024R377	KIAA0863	KIAA0863 protein, isoform CRA_a	2		PF00182	Domain	Glyco_hydro_19	Chitinase class I	CL0037		CL0195	DBL	This clan includes DBL (Duffy-binding like) domains from a variety of plasmodium surface proteins.	[1]. Structural basis for the EBA-175 erythrocyte invasion pathway of the malaria parasite Plasmodium falciparum. Tolia NH, Enemark EJ, Sim BK, Joshua-Tor L Cell 122, 183-193, (2005). PMID: 16051144										IPR019824	Binding_site	Leghaemoglobin, iron-binding site				0	A0A024R1Y5	PF00271		A0A024R597	CL0257		A0A024QZY1	IPR036282
A0A1B0VZK8	A0A1B0VZK8_HUMAN	ATP6	2	A0A023I7H5		A0A024R386	LOC57146	Promethin, isoform CRA_a	1		PF00183	Family	HSP90	Hsp90 protein			CL0196	DSRM	This clan contains RNA-binding domains.											IPR019825	Binding_site	Legume lectin, beta chain, Mn/Ca-binding site				0	A0A024R1Y5	PF04851		A0A024R597	CL0361		A0A024QZY1	IPR041503
A0A1B0VZV0	A0A1B0VZV0_HUMAN	ATP6	2	A0A023I7H5		A0A024R390	LOC81691	Exonuclease NEF-sp, isoform CRA_a	1		PF00184	Family	Hormone_5	Neurohypophysial hormones, C-terminal Domain			CL0197	GME	This superfamily contains a number of related enzymes such as AstB, peptidyl-arginine deiminase, arginine deiminase and amidinotransferase [1,2].	[1]. A novel superfamily of enzymes that catalyze the modification of guanidino groups. Shirai H, Blundell TL, Mizuguchi K Trends Biochem Sci 26, 465-468, (2001). PMID: 11504612	[2]. Prediction of the structure and function of AstA and AstB, the first two enzymes of the arginine succinyltransferase pathway of arginine catabolism. Shirai H, Mizuguchi K FEBS Lett 555, 505-510, (2003). PMID: 14675764									IPR019833	Binding_site	Manganese/iron superoxide dismutase, binding site				0	A0A024R1Y5	PF11648		A0A024R5B3	CL0662		A0A024QZY1	IPR042360
A0A1B0W2H6	A0A1B0W2H6_HUMAN	ATP6	2	A0A023I7H5		A0A024R395	MRE11A	Double-strand break repair protein	3		PF00185	Domain	OTCace	Aspartate/ornithine carbamoyltransferase, Asp/Orn binding domain	CL0399		CL0198	HHH	This superfamily includes Helix-hairpin-helix DNA-binding domains.	[1]. The helix-hairpin-helix DNA-binding motif: a structural basis for non-sequence-specific recognition of DNA. Doherty AJ, Serpell LC, Ponting CP Nucleic Acids Res 24, 2488-2497, (1996). PMID: 8692686	[2]. Common fold in helix-hairpin-helix proteins. Shao X, Grishin NV Nucleic Acids Res 28, 2643-2650, (2000). PMID: 10908318									IPR019843	Binding_site	DNA polymerase family X, binding site				0	A0A024R1Y5	PF18119		A0A024R5B9	CL0021		A0A024QZY6	IPR029266
A0A1B0W2I8	A0A1B0W2I8_HUMAN	ATP6	2	A0A023I7H5		A0A024R3A3	FN5	Single-pass membrane and coiled-coil domain-containing protein 4	1		PF00186	Domain	DHFR_1	Dihydrofolate reductase	CL0387		CL0199	DPBB	The DPBB fold is often an enzymatic domain. The members of this family are quite diverse, and if catalytic this family may contain several different functions [1,2]. This clan represents the barwin like barrels.	[1]. N-ethylmaleimide-sensitive fusion protein (NSF) and CDC48 confirmed as members of the double-psi beta-barrel aspartate decarboxylase/formate dehydrogenase family. Mizuguchi K, Dhanaraj V, Blundell TL, Murzin AG Structure Fold Des. 7, 215-216, (1999). PMID: 10610264	[2]. A six-stranded double-psi beta barrel is shared by several protein superfamilies. Castillo RM, Mizuguchi K, Dhanaraj V, Albert A, Blundell TL, Murzin AG Structure Fold Des 7, 227-236, (1999). PMID: 10368289									IPR020537	Binding_site	ATP synthase, F0 complex, subunit C, DCCD-binding site				0	A0A024R1Y7	PF03321		A0A024R5C6	CL0257		A0A024QZY9	IPR011989
A0A1B0W446	A0A1B0W446_HUMAN	ATP6	2	A0A023I7H5		A0A024R3A8	SRP46	Splicing factor, arginine/serine-rich, 46kD, isoform CRA_a	2		PF00187	Domain	Chitin_bind_1	Chitin recognition protein			CL0200	Prefoldin	The Prefoldin domain forms a coiled-coil structure that is involved in substrate-binding in the the chaperone co-factor prefoldin (PFD). Each PFD is assembled from two alpha and four beta subunits. Each alpha subunit contains two, and each beta subunit one, central beta-hairpin that is flanked N- and C-terminally by coiled-coil helices. The N-terminal regions, the prefoldin domain, are found faci…	[1]. Coiled coils meet the chaperone world. Martin J, Gruber M, Lupas AN Trends Biochem Sci 29, 455-458, (2004). PMID: 15337117										IPR020563	Binding_site	Crossover junction endodeoxyribonuclease RuvC, magnesium-binding site				0	A0A024R1Z9	PF03632		A0A024R5H3	CL0255		A0A024QZY9	IPR016024
A0A1B0W5Q2	A0A1B0W5Q2_HUMAN	ATP6	2	A0A023I7H5		A0A024R3A9	JOSD3	TATA box-binding protein-associated factor RNA polymerase I subunit D, TATA box-binding protein-associated factor 1D, Transcription initiation factor SL1/TIF-IB subunit D	3		PF00188	Domain	CAP	Cysteine-rich secretory protein family	CL0659		CL0201	Peptidase_SH	This clan includes the serine peptidase assemblin from herpes virus as well as other viral peptidase families predicted to be related [1].	[1]. Double-stranded DNA bacteriophage prohead protease is homologous to herpesvirus protease. Cheng H, Shen N, Pei J, Grishin NV Protein Sci 13, 2260-2269, (2004). PMID: 15273316										IPR020578	Binding_site	Aminotransferase class-V, pyridoxal-phosphate binding site				0	A0A024R216	PF00855		A0A024R5J3	CL0192		A0A024QZY9	IPR026136
A0A1B0W5Q6	A0A1B0W5Q6_HUMAN	ATP6	2	A0A023I7H5		A0A024R3B4	HSPC148	Spliceosome-associated protein CWC15 homolog	1		PF00189	Domain	Ribosomal_S3_C	Ribosomal protein S3, C-terminal domain			CL0202	GBD	This large superfamily contains beta sandwich domains with a jelly roll topology. Many of these families are involved in carbohydrate recognition. Despite sharing little sequence similarity they do share a weak sequence motif, with a conserved bulge in the C-terminal beta sheet. The probable role of this bulge is in bending of the beta sheet that contains the bulge. This enables the curvature of …	[1]. Distant homology recognition using structural classification of proteins. Murzin AG, Bateman A Proteins 1, 105-112, (1997). PMID: 9485501										IPR020583	Binding_site	Inositol monophosphatase, metal-binding site				0	A0A024R219	PF01428		A0A024R5J8	CL0022		A0A024QZY9	IPR031780
A0A1B0W6X2	A0A1B0W6X2_HUMAN	ATP6	2	A0A023I7H5		A0A024R3C2	LOC57149	Complex 1 LYR protein domain-containing protein	2		PF00190	Domain	Cupin_1	Cupin	CL0029		CL0203	CBD	This superfamily includes several carbohydrate binding domains. These domains have a beta sandwich structure.											IPR020622	Binding_site	Alanine racemase, pyridoxal-phosphate attachment site				0	A0A024R219	PF01754		A0A024R5N4	CL0186		A0A024QZZ4	IPR013087
A0A1B0W800	A0A1B0W800_HUMAN	ATP6	2	A0A023I7H5		A0A024R3C4	KDELC2	KDEL (Lys-Asp-Glu-Leu) containing 2, isoform CRA_a	2		PF00191	Domain	Annexin	Annexin			CL0204	Adhesin	This superfamily includes a variety of bacterial adhesins that have a jelly-roll beta-barrel fold [1]. These domains are involved in sugar recognition.	[1]. The structural basis of receptor-binding by Escherichia coli associated with diarrhea and septicemia. Merckel MC, Tanskanen J, Edelman S, Westerlund-Wikstrom B, Korhonen TK, Goldman A J Mol Biol 331, 897-905, (2003). PMID: 12909017										IPR020789	Binding_site	RNA polymerases, subunit N, zinc binding site				0	A0A024R220	PF12496		A0A024R5P6	CL0125		A0A024QZZ4	IPR036236
A0A1B0W9M1	A0A1B0W9M1_HUMAN	ATP6	2	A0A023I7H5		A0A024R3C9	C11orf65	Chromosome 11 open reading frame 65, isoform CRA_b	1		PF00193	Domain	Xlink	Extracellular link domain	CL0056		CL0205	Di-copper	This superfamily includes tyrosinases and hemocyanins that share a di-copper centre [1].	[1]. Evolutionary relationships among copper proteins containing coupled binuclear copper sites. Lerch K, Germann UA Prog Clin Biol Res 274, 331-348, (1988). PMID: 3136463										IPR020826	Binding_site	Transketolase binding site				0	A0A024R228	PF00013		A0A024R5Q7	CL0023		A0A024QZZ7	IPR000558
A0A1B1PEM2	A0A1B1PEM2_HUMAN	ATP6	2	A0A023I7H5		A0A024R3D4	DKFZp547C195	RING-type domain-containing protein	1		PF00194	Domain	Carb_anhydrase	Eukaryotic-type carbonic anhydrase			CL0206	TRB	This beta-barrel domain is found at the C-terminus of a variety of transcriptional repressor proteins.											IPR020833	Binding_site	Lipoxygenase, iron binding site				0	A0A024R228	PF08067		A0A024R5R0	CL0101		A0A024QZZ7	IPR007125
A0A1B1PEM5	A0A1B1PEM5_HUMAN	ATP6	2	A0A023I7H5		A0A024R3F5	MIZF	MBD2-interacting zinc finger, isoform CRA_b	2		PF00195	Domain	Chal_sti_synt_N	Chalcone and stilbene synthases, N-terminal domain	CL0046		CL0207	Rhomboid-like	This clan contains proteins from both bacteria and eukaryotes. The Rhomboid protein is an intramembrane serine protease which is involved in epidermal growth factor (EGF)-dependent signalling pathways [1]. The DER1 family is involved in degradation of misfolded ER proteins [2].	[1]. The rhomboids: a nearly ubiquitous family of intramembrane serine proteases that probably evolved by multiple ancient horizontal gene transfers. Koonin EV, Makarova KS, Rogozin IB, Davidovic L, Letellier MC, Pellegrini L (). PMID: 12620104	[2]. Der1, a novel protein specifically required for endoplasmic reticulum degradation in yeast. Knop M, Finger A, Braun T, Hellmuth K, Wolf DH EMBO J 15, 753-763, (1996). PMID: 8631297									IPR020847	Binding_site	AP endonuclease 1, binding site				0	A0A024R229	PF10162		A0A024R5T6	CL0033		A0A024QZZ7	IPR009072
A0A1B1PEP3	A0A1B1PEP3_HUMAN	ATP6	2	A0A023I7H5		A0A024R3G4	SC5DL	Sterol-C5-desaturase (ERG3 delta-5-desaturase homolog, fungal)-like, isoform CRA_b	1		PF00196	Domain	GerE	Bacterial regulatory proteins, luxR family	CL0123		CL0208	UBC	This superfamily includes a diverse set of proteins that bind to ubiquitin [1].	[1]. Ubiquitin-binding proteins: similar, but different. Andersen KM, Hofmann K, Hartmann-Petersen R Essays Biochem 41, 49-67, (2005). PMID: 16250897										IPR020855	Binding_site	Ureohydrolase, manganese-binding site				0	A0A024R229	PF15711		A0A024R5U5	CL0126		A0A024R017	IPR002119
A0A1B1PER3	A0A1B1PER3_HUMAN	ATP6	2	A0A023I7H5		A0A024R3G7	SNF1LK2	non-specific serine/threonine protein kinase, 2.7.11.1	3		PF00197	Domain	Kunitz_legume	Trypsin and protease inhibitor	CL0066		CL0209	Bet_v_1_like	The Pfam:PF00407 entry is composed of sequences related to the major Birch (Betula verrucose) pollen antigen Bet v 1. This allergen is known to cause hayfever, dermatitis, asthma and occasionally anaphylactic shock. The other families in this clan share the same structure as Bet v 1, which is composed of antiparallel beta sheets and alpha helices. There is a cavity between the beta sheet and a lo…	[1]. Crystal structure of a hypoallergenic isoform of the major birch pollen allergen Bet v 1 and its likely biological function as a plant steroid carrier. Markovic-Housley Z, Degano M, Lamba D, von Roepenack-Lahaye E, Clemens S, Susani M, Ferreira F, Scheiner O, Breiteneder H J Mol Biol 325, 123-133, (2003). PMID: 12473456	[2]. START domain proteins and the intracellular trafficking of cholesterol in steroidogenic cells. Strauss JF 3rd, Kishida T, Christenson LK, Fujimoto T, Hiroi H Mol Cell Endocrinol 202, 59-65, (2003). PMID: 12770731	[3]. Crystal structure of the Saccharomyces cerevisiae phosphatidylinositol-transfer protein. Sha B, Phillips SE, Bankaitis VA, Luo M Nature 391, 506-510, (1998). PMID: 9461221	[4]. Adaptations of the helix-grip fold for ligand binding and catalysis in the START domain superfamily. Iyer LM, Koonin EV, Aravind L Proteins. 43, 134-144, (2001). PMID: 11276083	[5]. The Bet v 1 fold: an ancient, versatile scaffold for binding of large, hydrophobic ligands. Radauer C, Lackner P, Breiteneder H (). PMID: 18922149						IPR020969	Binding_site	Ankyrin-G binding site				0	A0A024R235	PF00098		A0A024R5U8	CL0175		A0A024R017	IPR007125
A0A1B2RCV6	A0A1B2RCV6_HUMAN	ATP6	2	A0A023I7H5		A0A024R3G9	C11orf60	Intraflagellar transport protein 46 homolog	2		PF00198	Domain	2-oxoacid_dh	2-oxoacid dehydrogenases acyltransferase (catalytic domain)	CL0149		CL0210	HNOX-like	This clan contains families that bind small molecules and are predominantly involved in signalling. Members include the heme NO binding domain. This domain is related to soluble guanylate cyclases and is mainly alpha helical in structure. Other members of this clan include V4R, which is predicted to be a small molecule binding domain, and a domain often found adjacent to this that is found on act…	[1]. Ancient conserved domains shared by animal soluble guanylyl cyclases and bacterial signaling proteins. Iyer LM, Anantharaman V, Aravind L (). PMID: 12590654	[2]. Crystal structure of an oxygen-binding heme domain related to soluble guanylate cyclases. Pellicena P, Karow DS, Boon EM, Marletta MA, Kuriyan J Proc Natl Acad Sci U S A 101, 12854-12859, (2004). PMID: 15326296									IPR021115	Binding_site	Pyridoxal-phosphate binding site				0	A0A024R235	PF03828		A0A024R5Y9	CL0361		A0A024R017	IPR009072
A0A1D8MBG9	A0A1D8MBG9_HUMAN	ATP6	2	A0A023I7H5		A0A024R3H3	LOH11CR2A	Loss of heterozygosity, 11, chromosomal region 2, gene A, isoform CRA_b	1		PF00199	Domain	Catalase	Catalase			CL0212	SNARE	This clan includes part of the SNARE like superfamily.											IPR021158	Binding_site	Peptidase M10A, cysteine switch, zinc binding site				0	A0A024R235	PF16631		A0A024R5Z9	CL0151		A0A024R017	IPR032454
A0A1D8RFH8	A0A1D8RFH8_HUMAN	ATP6	2	A0A023I7H5		A0A024R3H5	C11orf57	Chromosome 11 open reading frame 57, isoform CRA_a	1		PF00200	Domain	Disintegrin	Disintegrin			CL0213	ShK-like	Members of this clan include the Crisp domain which is involved in ryanodine receptor Ca2+ signalling, and the ShK domain which is named after the ShK channel inhibitor toxin. Both domains are cysteine rich and contain multiple disulphide bonds [1][2][3].	[1]. Solution structure of ShK toxin, a novel potassium channel inhibitor from a sea anemone. Tudor JE, Pallaghy PK, Pennington MW, Norton RS Nat Struct Biol. 3, 317-320, (1996). PMID: 8599755	[2]. The crisp domain of Tpx-1 is related to ion channel toxins and regulates ryanodine receptor Ca2+ signalling. Gibbs GM, Scanlon MJ, Swarbrick J, Curtis S, Gallant E, Dulhunty A, O'bryan MK (). PMID: 16339766	[3]. Characterization of a potassium channel toxin from the Caribbean Sea anemone Stichodactyla helianthus. Castaneda O, Sotolongo V, Amor AM, Stocklin R, Anderson AJ, Harvey AL, Engstrom A, Wernstedt C, Karlsson E Toxicon. 33, 603-613, (1995). PMID: 7660365								IPR022407	Binding_site	Oxidoreductase, molybdopterin binding site				0	A0A024R235	PF19088		A0A024R611	CL0186		A0A024R017	IPR032458
A0A1J0PMF1	A0A1J0PMF1_HUMAN	ATP6	2	A0A023I7H5		A0A024R3K1	EVA1	Epithelial V-like antigen 1, isoform CRA_a	1		PF00201	Family	UDPGT	UDP-glucoronosyl and UDP-glucosyl transferase	CL0113		CL0214	UBA	This superfamily includes domains related to the UBA domain. These domains are often involved in ubiquitin binding.											IPR022419	Binding_site	Porphobilinogen deaminase, dipyrromethane cofactor binding site				0	A0A024R244	PF00017		A0A024R643	CL0021		A0A024R032	IPR001452
A0A1J0PP53	A0A1J0PP53_HUMAN	ATP6	2	A0A023I7H5		A0A024R3L0	CCDC84	Coiled-coil domain containing 84, isoform CRA_a	1		PF00202	Domain	Aminotran_3	Aminotransferase class-III	CL0061		CL0217	Rotavirus_VP7	This clan consists of several Rotavirus major outer capsid protein VP7 sequences. The rotavirus capsid is composed of three concentric protein layers. Proteins VP4 and VP7 comprise the outer layer. VP4 forms spikes and is the viral attachment protein. VP7 is a glycoprotein and the major constituent of the outer protein layer [1].	[1]. Antibodies to rotavirus outer capsid glycoprotein VP7 neutralize infectivity by inhibiting virion decapsidation. Ludert JE, Ruiz MC, Hidalgo C, Liprandi F J Virol 76, 6643-6651, (2002). PMID: 12050377										IPR022653	Binding_site	Orn/DAP/Arg decarboxylase 2, pyridoxal-phosphate binding site				0	A0A024R244	PF07714		A0A024R654	CL0448		A0A024R032	IPR029294
A0A1J0PQ15	A0A1J0PQ15_HUMAN	ATP6	2	A0A023I7H5		A0A024R3L5	PDZD3	PDZ domain containing 3, isoform CRA_c	1		PF00203	Domain	Ribosomal_S19	Ribosomal protein S19			CL0219	RNase_H	This clan includes a diverse set of nucleases that share a similar structure to Ribonuclease H.	[1]. Retroviral integrases and their cousins. Rice P, Craigie R, Davies DR Curr Opin Struct Biol. 6, 76-83, (1996). PMID: 8696976										IPR023418	Binding_site	Transthyretin, thyroxine binding site				0	A0A024R259	PF02854		A0A024R656	CL0023		A0A024R032	IPR035540
A0A1J0PQ23	A0A1J0PQ23_HUMAN	ATP6	2	A0A023I7H5		A0A024R3L8	FLJ21103	SIR2-like domain-containing protein	1		PF00204	Domain	DNA_gyraseB	DNA gyrase B	CL0329		CL0220	EF_hand	The EF hand is a calcium binding domain found in a wide variety of proteins [1].	[1]. Diversity of conformational states and changes within the EF-hand protein superfamily. Yap KL, Ames JB, Swindells MB, Ikura M Proteins. 37, 499-507, (1999). PMID: 10591109										IPR023615	Binding_site	Cytochrome c oxidase, subunit I, copper-binding site				0	A0A024R282	PF00023		A0A024R658	CL0537		A0A024R032	IPR036028
A0A1J0PRQ1	A0A1J0PRQ1_HUMAN	ATP6	2	A0A023I7H5		A0A024R3N1	RICS	Rho GTPase-activating protein, isoform CRA_a	1		PF00205	Domain	TPP_enzyme_M	Thiamine pyrophosphate enzyme, central domain	CL0085		CL0221	RRM	This clan contains families that are related to the RNA recognition motif domains. However, not all these families are RNA binding.											IPR025662	Binding_site	Sigma-54 interaction domain, ATP-binding site 1				0	A0A024R282	PF12796		A0A024R667	CL0186		A0A024R032	IPR043443
A0A1J0PS43	A0A1J0PS43_HUMAN	ATP6	2	A0A023I7H5		A0A024R3N9	LOC89944	Beta-galactosidase, 3.2.1.23	2		PF00206	Domain	Lyase_1	Lyase			CL0222	MviN_MATE	This superfamily consists of a variety of integral membrane protein families. The MATE family are known to be transporters. Other proteins have been implicated in virulence and polysaccharide biosynthesis.											IPR025943	Binding_site	Sigma-54 interaction domain, ATP-binding site 2				0	A0A024R292	PF00106		A0A024R687	CL0072		A0A024R048	IPR012355
A0A1J0PTX0	A0A1J0PTX0_HUMAN	ATP6	2	A0A023I7H5		A0A024R3U2	C1orf124	DNA-dependent metalloprotease SPRTN, Protein with SprT-like domain at the N terminus	2		PF00207	Family	A2M	Alpha-2-macroglobulin family	CL0159		CL0223	MACRO	This superfamily includes the Macro domain as well as the amino terminal domain from peptidase M17 proteins.	[1]. The macro domain is an ADP-ribose binding module. Karras GI, Kustatscher G, Buhecha HR, Allen MD, Pugieux C, Sait F, Bycroft M, Ladurner AG EMBO J 24, 1911-1920, (2005). PMID: 15902274										IPR027430	Binding_site	Visual pigments (opsins) retinal binding site				0	A0A024R294	PF07160		A0A024R687	CL0266		A0A024R048	IPR016064
A0A1J0Q2C9	A0A1J0Q2C9_HUMAN	ATP6	2	A0A023I7H5		A0A024R3U7	PCNXL2	Pecanex-like protein	2		PF00208	Domain	ELFV_dehydrog	Glutamate/Leucine/Phenylalanine/Valine dehydrogenase	CL0063		CL0224	DHQS	This superfamily includes Dehydroquinate synthase and Iron containing alcohol dehydrogenase which have a similar active site organisation [1].	[1]. Structure of dehydroquinate synthase reveals an active site capable of multistep catalysis. Carpenter EP, Hawkins AR, Frost JW, Brown KA Nature. 394, 299-302, (1998). PMID: 9685163										IPR027467	Binding_site	Molybdopterin oxidoreductase, molybdopterin cofactor binding site				0	A0A024R297	PF02513		A0A024R687	CL0632		A0A024R048	IPR017437
A0A1J0Q2N5	A0A1J0Q2N5_HUMAN	ATP6	2	A0A023I7H5		A0A024R3U8	FLJ22555	M-AAA protease-interacting protein 1, mitochondrial	1		PF00209	Family	SNF	Sodium:neurotransmitter symporter family	CL0062		CL0225	FtsL	This clan includes two proteins that are known to interact, FtsL and DivIC which are part of a trimeric complex with DivIB [2]. DivIC and FtsL are bacterial proteins essential for cell division.	[1]. The Bacillus subtilis cell division protein FtsL localizes to sites of septation and interacts with DivIC. Sievers J, Errington J Mol Microbiol 36, 846-855, (2000). PMID: 10844672	[2]. In vitro reconstitution of a trimeric complex of DivIB, DivIC and FtsL, and their transient co-localization at the division site in Streptococcus pneumoniae. Noirclerc-Savoye M, Le Gouellec A, Morlot C, Dideberg O, Vernet T, Zapun A Mol Microbiol. 55, 413-424, (2005). PMID: 15659160									IPR028871	Binding_site	Blue (type 1) copper protein, binding site				0	A0A024R2A8	PF01454		A0A024R6A3	CL0130		A0A024R048	IPR017438
A0A1J0Q3W7	A0A1J0Q3W7_HUMAN	ATP6	2	A0A023I7H5		A0A024R3V0	DNAPTP6	DNA polymerase-transactivated protein 6, isoform CRA_a	2		PF00210	Domain	Ferritin	Ferritin-like domain	CL0044		CL0226	M6PR	This clan includes cation dependent and independent mannose 6-phosphate receptors.											IPR029754	Binding_site	Urease nickel binding site				0	A0A024R2D7	PF10198		A0A024R6D8	CL0221		A0A024R049	IPR000719
A0A1J0Q5V1	A0A1J0Q5V1_HUMAN	ATP6	2	A0A023I7H5		A0A024R3X5	KIAA0971	KIAA0971, isoform CRA_b	1		PF00211	Domain	Guanylate_cyc	Adenylate and Guanylate cyclase catalytic domain	CL0276		CL0227	Enolase_N	This domain is found at the N-terminus of the catalytic Tim barrel-like domain in enolase and other enzymes.											IPR034408	Binding_site	Sulphate/thiosulphate-binding site				0	A0A024R2J4	PF07557		A0A024R6F2	CL0537		A0A024R049	IPR008271
A0A1J0Q6G1	A0A1J0Q6G1_HUMAN	ATP6	2	A0A023I7H5		A0A024R3X9	PREI3	Preimplantation protein 3, isoform CRA_a	2		PF00212	Family	ANP	Atrial natriuretic peptide			CL0228	Acyltransferase	This clan includes several families of related acyltransferases.											IPR000035	Conserved_site	Alkylbase DNA glycosidase, conserved site				0	A0A024R2J4	PF07558		A0A024R6I1	CL0123		A0A024R049	IPR011009
A0A1J0Q6T4	A0A1J0Q6T4_HUMAN	ATP6	2	A0A023I7H5		A0A024R3Z4	ZNFN1A2	Zinc finger protein, subfamily 1A, 2 (Helios), isoform CRA_c	1		PF00213	Family	OSCP	ATP synthase delta (OSCP) subunit	CL0255		CL0229	RING	This clan includes the Ring zinc finger domains as well as the U-box domain that appears to have lost the zinc coordinating cysteine residues [1].	[1]. The U box is a modified RING finger - a common domain in ubiquitination. Aravind L, Koonin EV Curr Biol 10, 132-134, (2000). PMID: 10704423										IPR000047	Conserved_site	Helix-turn-helix motif				0	A0A024R2P4	PF04577		A0A024R6K8	CL0039		A0A024R054	IPR007671
A0A1J0Q723	A0A1J0Q723_HUMAN	ATP6	2	A0A023I7H5		A0A024R402	LOC151194	Similar to hepatocellular carcinoma-associated antigen HCA557b, isoform CRA_a	1		PF00214	Family	Calc_CGRP_IAPP	Calcitonin / CGRP / IAPP family			CL0230	HO	This clan includes the Heme oxygenase family as well as the TENA/THI-4/PQQC family that are less well characterised [2].	[1]. The 2.35 A structure of the TenA homolog from Pyrococcus furiosus supports an enzymatic function in thiamine metabolism. Benach J, Edstrom WC, Lee I, Das K, Cooper B, Xiao R, Liu J, Rost B, Acton TB, Montelione GT, Hunt JF Acta Crystallogr D Biol Crystallogr. 61, 589-598, (2005). PMID: 15858269	[2]. Crystal structure of human heme oxygenase-1. Schuller DJ, Wilks A, Ortiz de Montellano PR, Poulos TL Nat Struct Biol. 6, 860-867, (1999). PMID: 10467099									IPR000049	Conserved_site	Electron transfer flavoprotein, beta-subunit, conserved site				0	A0A024R2Q1	PF13774		A0A024R6K8	CL0600		A0A024R054	IPR037941
A0A1J0Q978	A0A1J0Q978_HUMAN	ATP6	2	A0A023I7H5		A0A024R403	FLJ37953	JmjC domain-containing protein	1		PF00215	Domain	OMPdecase	Orotidine 5'-phosphate decarboxylase / HUMPS family	CL0036		CL0231	MazG	This superfamily includes MazG, HisE and dimeric dUTPases (Not yet in Pfam) [1].	[1]. Dimeric dUTPases, HisE, and MazG belong to a new superfamily of all-alpha NTP pyrophosphohydrolases with potential "house-cleaning" functions. Moroz OV, Murzin AG, Makarova KS, Koonin EV, Wilson KS, Galperin MY J Mol Biol. 347, 243-255, (2005). PMID: 15740738										IPR000059	Conserved_site	NUDIX hydrolase, NudL, conserved site				0	A0A024R2Q3	PF00514		A0A024R6Q2	CL0063		A0A024R057	IPR001909
A0A1J0QAL9	A0A1J0QAL9_HUMAN	ATP6	2	A0A023I7H5		A0A024R405	ALS2CR8	Amyotrophic lateral sclerosis 2 (Juvenile) chromosome region, candidate 8, isoform CRA_b	1		PF00216	Domain	Bac_DNA_binding	Bacterial DNA-binding protein	CL0548		CL0232	NifU	This clan includes the C-terminal domain of NifU as well as a large family of uncharacterised domains.											IPR000111	Conserved_site	Glycoside hydrolase family 27/36, conserved site				0	A0A024R2R3	PF03062		A0A024R6S6	CL0208		A0A024R057	IPR003655
A0A1J0QCE6	A0A1J0QCE6_HUMAN	ATP6	2	A0A023I7H5		A0A024R411	ORC2L	Origin recognition complex subunit 2	2		PF00217	Domain	ATP-gua_Ptrans	ATP:guanido phosphotransferase, C-terminal catalytic domain	CL0286		CL0233	SufE_NifU	This clan includes iron sulfur cluster assembly proteins.											IPR000132	Conserved_site	Nitrilase/cyanide hydratase, conserved site				0	A0A024R2R9	PF14687		A0A024R6V6	CL0247		A0A024R057	IPR028804
A0A1J0QHC8	A0A1J0QHC8_HUMAN	ATP6	2	A0A023I7H5		A0A024R422	ALS2CR4	Amyotrophic lateral sclerosis 2 (Juvenile) chromosome region, candidate 4, isoform CRA_a	1		PF00218	Domain	IGPS	Indole-3-glycerol phosphate synthase	CL0036		CL0234	CTPT	This clan includes the integral membrane CTP transferase family as well as a large family of uncharacterised proteins that may also function as nucleotidyltransferases.											IPR000283	Conserved_site	NADH:ubiquinone oxidoreductase, 75kDa subunit, conserved site				0	A0A024R2S0	PF04547		A0A024R6W8	CL0022		A0A024R057	IPR036051
A0A1J0QJ65	A0A1J0QJ65_HUMAN	ATP6	2	A0A023I7H5		A0A024R430	LOC92691	Transmembrane protein 169	1		PF00219	Domain	IGFBP	Insulin-like growth factor binding protein	CL0547		CL0235	PspA	This clan includes PspA like proteins that are transcriptional activators as well as Snf7, a protein involved in cellular trafficking.											IPR000291	Conserved_site	D-alanine--D-alanine ligase/VANA/B/C, conserved site				0	A0A024R2S8	PF13908		A0A024R6Z7	CL0036		A0A024R061	IPR001388
A0A1J0QK08	A0A1J0QK08_HUMAN	ATP6	2	A0A023I7H5		A0A024R432	C2orf24	Chromosome 2 open reading frame 24, isoform CRA_b	1		PF00220	Family	Hormone_4	Neurohypophysial hormones, N-terminal Domain			CL0236	PDDEXK	This clan includes a large number of nuclease families related to holliday junction resolvases [1,2].	[1]. Holliday junction resolvases and related nucleases: identification of new families, phyletic distribution and evolutionary trajectories. Aravind L, Makarova KS, Koonin EV Nucleic Acids Res. 28, 3417-3432, (2000). PMID: 10982859	[2]. Identification of a new family of putative PD-(D/E)XK nucleases with unusual phylogenomic distribution and a new type of the active site. Feder M, Bujnicki JM BMC Genomics. 6, 21-21, (2005). PMID: 15720711	[3]. Human herpesvirus 1 UL24 gene encodes a potential PD-(D/E)XK endonuclease. Knizewski L, Kinch L, Grishin NV, Rychlewski L, Ginalski K J Virol. 80, 2575-2577, (2006). PMID: 16474163	[4]. Identification of novel restriction endonuclease-like fold families among hypothetical proteins. Kinch LN, Ginalski K, Rychlewski L, Grishin NV Nucleic Acids Res. 33, 3598-3605, (2005). PMID: 15972856	[5]. Sequence, structure and functional diversity of PD-(D/E)XK phosphodiesterase superfamily. Steczkiewicz K, Muszewska A, Knizewski L, Rychlewski L, Ginalski K Nucleic Acids Res. 40, 7016-7045, (2012). PMID: 22638584						IPR000318	Conserved_site	Nitrogenase component 1, conserved site				0	A0A024R2T8	PF01223		A0A024R6Z7	CL0196		A0A024R061	IPR010908
A0A1J0QLD4	A0A1J0QLD4_HUMAN	ATP6	2	A0A023I7H5		A0A024R458	HRB	HIV-1 Rev binding protein, isoform CRA_a	1		PF00221	Family	Lyase_aromatic	Aromatic amino acid lyase			CL0237	HD_PDEase	This clan includes a range of phosphohydrolase enzymes with a common helical fold.											IPR000319	Conserved_site	Aspartate-semialdehyde dehydrogenase, conserved site				0	A0A024R2U8	PF16019		A0A024R702	CL0220		A0A024R061	IPR011012
A0A1J0QLK0	A0A1J0QLK0_HUMAN	ATP6	2	A0A023I7H5		A0A024R483	MGC99813	DUF4203 domain-containing protein	2		PF00223	Family	PsaA_PsaB	Photosystem I psaA/psaB protein			CL0238	PP2C	This clan includes the PP2C family of phosphatases as well as the SpoIIE family. This suggests SpoIIE proteins may also be phosphatases.											IPR000385	Conserved_site	MoaA/NifB/PqqE, iron-sulphur binding, conserved site				0	A0A024R2X2	PF03770		A0A024R718	CL0036		A0A024R061	IPR042855
A0A1J0QWU2	A0A1J0QWU2_HUMAN	ATP6	2	A0A023I7H5		A0A024R4A5	TNRC15	Trinucleotide repeat containing 15, isoform CRA_a	1		PF00224	Domain	PK	Pyruvate kinase, barrel domain	CL0151		CL0239	Insulin	This superfamily includes the insulin like hormones.											IPR000399	Conserved_site	TPP-binding enzyme, conserved site				0	A0A024R328	PF00069		A0A024R737	CL0381		A0A024R073	IPR001279
A0A1L1XXZ8	A0A1L1XXZ8_HUMAN	ATP6	2	A0A023I7H5		A0A024R4B0	SPATA3	Spermatogenesis associated 3, isoform CRA_b	4		PF00225	Domain	Kinesin	Kinesin motor domain	CL0023		CL0240	PFK	This clan includes two SCOP superfamilies. Strong similarities between NAD kinases, DAG kinase, sphingosine kinase and PFK have previously been shown[1].	[1]. Diacylglyceride kinases, sphingosine kinases and NAD kinases: distant relatives of 6-phosphofructokinases. Labesse G, Douguet D, Assairi L, Gilles AM Trends Biochem Sci. 27, 273-275, (2002). PMID: 12069781										IPR000445	Conserved_site	Helix-hairpin-helix motif				0	A0A024R328	PF00130		A0A024R746	CL0323		A0A024R073	IPR011108
A0A1L1Y114	A0A1L1Y114_HUMAN	ATP6	2	A0A023I7H5		A0A024R4B5	FLJ33590	3CxxC-type domain-containing protein	1		PF00226	Domain	DnaJ	DnaJ domain	CL0392		CL0241	ABC_membrane	This clan includes families that are the membrane components of ABC transporter complexes. In general these regions are composed of six transmembrane helices [1].	[1]. Structure of MsbA from Vibrio cholera: a multidrug resistance ABC transporter homolog in a closed conformation. Chang G J Mol Biol. 330, 419-430, (2003). PMID: 12823979										IPR000486	Conserved_site	Extradiol ring-cleavage dioxygenase, class I /II				0	A0A024R328	PF00433		A0A024R751	CL0186		A0A024R073	IPR022712
A0A1L1ZBF9	A0A1L1ZBF9_HUMAN	ATP6	2	A0A023I7H5		A0A024R4C0	FLJ22671	Mab-21-like HhH/H2TH-like domain-containing protein	1		PF00227	Domain	Proteasome	Proteasome subunit	CL0052		CL0242	DNA_primase_lrg	This clan contains the large subunit of archaeal and eukaryotic DNA primase, an enzyme which synthesises the oligoribonucleotide primers essential to DNA replication. The large subunit of DNA primase forms interactions with the small subunit and the structure implicates that it is not directly involved in catalysis, but plays a roles in correctly positioning the primase/DNA complex, and in the tr…	[1]. Structure of the heterodimeric core primase. Lao-Sirieix SH, Nookala RK, Roversi P, Bell SD, Pellegrini L Nat Struct Mol Biol. 12, 1137-1144, (2005). PMID: 16273105	[2]. Replication of Orgyia pseudotsugata baculovirus DNA: lef-2 and ie-1 are essential and ie-2, p34, and Op-iap are stimulatory genes. Ahrens CH, Rohrmann GF Virology 212, 650-662, (1995). PMID: 7571435	[3]. Baculovirus replication factor LEF-1 is a DNA primase. Mikhailov VS, Rohrmann GF J Virol 76, 2287-2297, (2002). PMID: 11836407								IPR000540	Conserved_site	Flagellar motor protein MotA, conserved site				0	A0A024R330	PF15134		A0A024R771	CL0072		A0A024R073	IPR036866
A0A1L1ZBJ7	A0A1L1ZBJ7_HUMAN	ATP6	2	A0A023I7H5		A0A024R4F1	HEL-S-17	phosphopyruvate hydratase, 4.2.1.11, 2-phospho-D-glycerate hydro-lyase	3		PF00228	Domain	Bowman-Birk_leg	Bowman-Birk serine protease inhibitor family			CL0243	AEP	This clan includes the small subunit of 2 and eukaryotic DNA primase, and primase-helicase proteins from bacteriophages and plasmids. All known cellular life forms use primases to synthesis a short RNA primer which is extended during DNA replication by a polymerase. Bacterial DNA primase adopts a different fold to archaeal and eukaryotic primases and belongs to a different superfamily.	[1]. Origin and evolution of the archaeo-eukaryotic primase superfamily and related palm-domain proteins: structural insights and new members. Iyer LM, Koonin EV, Leipe DD, Aravind L Nucleic Acids Res. 33, 3875-3896, (2005). PMID: 16027112										IPR000614	Conserved_site	Free Met sulfoxide reductase conserved site				0	A0A024R332	PF05615		A0A024R7A6	CL0072		A0A024R096	IPR009653
A0A1L1ZBP8	A0A1L1ZBP8_HUMAN	ATP6	2	A0A023I7H5		A0A024R4F5	HFE2	Hemochromatosis type 2 (Juvenile), isoform CRA_b	3		PF00229	Domain	TNF	TNF(Tumour Necrosis Factor) family	CL0100		CL0244	PGBD	This clan consists of small putative peptidoglycan binding domains composed of three alpha helices.											IPR000629	Conserved_site	ATP-dependent RNA helicase DEAD-box, conserved site				0	A0A024R333	PF00400		A0A024R7A6	CL0159		A0A024R096	IPR042863
A0A1L1ZCA7	A0A1L1ZCA7_HUMAN	ATP6	2	A0A023I7H5		A0A024R4G0	KIAA0495	KIAA0495, isoform CRA_a	1		PF00230	Family	MIP	Major intrinsic protein	CL0716		CL0245	EDD	The EDD superfamily was identified as an evolutionarily conserved domain (EDD) common to three different folds: mannose transporter EIIA domain (EIIA-man), dihydroxyacetone kinase (Dak), and DegV [1]. Both Dak and EIIA-man perform similar phosphotransfer reactions, suggesting a phosphotransferase activity for the DegV-like family of proteins, whose function other than lipid binding revealed in th…	[1]. EDD, a novel phosphotransferase domain common to mannose transporter EIIA, dihydroxyacetone kinase, and DegV. Kinch LN, Cheek S, Grishin NV Protein Sci. 14, 360-367, (2005). PMID: 15632288	[2]. Crystal structure of a hypothetical protein, TM841 of Thermotoga maritima, reveals its function as a fatty acid-binding protein. Schulze-Gahmen U, Pelaschier J, Yokota H, Kim R, Kim SH Proteins 50, 526-530, (2003). PMID: 12577257									IPR000633	Conserved_site	Vinculin, conserved site				0	A0A024R355	PF00929		A0A024R7A6	CL0186		A0A024R0B3	IPR031490
A0A1L1ZCN9	A0A1L1ZCN9_HUMAN	ATP6	2	A0A023I7H5		A0A024R4G9	MGC13170	Chromosome 19 open reading frame 48, Multidrug resistance-related protein, isoform CRA_a	1		PF00231	Domain	ATP-synt	ATP synthase			CL0246	ISOCOT_Fold	This superfamily contains a variety of enzymes and non-enzymatic ligand binding domains.	[1]. Diversification of catalytic activities and ligand interactions in the protein fold shared by the sugar isomerases, eIF2B, DeoR transcription factors, acyl-CoA transferases and methenyltetrahydrofolate synthetase. Anantharaman V, Aravind L J Mol Biol. 356, 823-842, (2006). PMID: 16376935										IPR000637	Conserved_site	HMG-I/HMG-Y, DNA-binding, conserved site				0	A0A024R355	PF02037		A0A024R7A6	CL0630		A0A024R0B3	IPR031491
A0A1L1ZEQ1	A0A1L1ZEQ1_HUMAN	ATP6	2	A0A023I7H5		A0A024R4J0	LOC125893	Zinc finger protein 816	1		PF00232	Domain	Glyco_hydro_1	Glycosyl hydrolase family 1	CL0058		CL0247	2H	This clan includes a number of phosphoesterases that contain an internal duplication.	[1]. Detection of novel members, structure-function analysis and evolutionary classification of the 2H phosphoesterase superfamily. Mazumder R, Iyer LM, Vasudevan S, Aravind L Nucleic Acids Res 30, 5229-5243, (2002). PMID: 12466548										IPR000645	Conserved_site	Type II secretion system protein GspN, conserved site				0	A0A024R369	PF12020		A0A024R7B2	CL0192		A0A024R0B7	IPR019402
A0A1L1ZF82	A0A1L1ZF82_HUMAN	ATP6	2	A0A023I7H5		A0A024R4L8	LOC91661	KRAB domain-containing protein	1		PF00233	Domain	PDEase_I	3'5'-cyclic nucleotide phosphodiesterase	CL0237		CL0248	ParBc	This superfamily includes nucleases related to ParB as well as uncharacterised proteins.											IPR000804	Conserved_site	Clathrin adaptor complex, small chain				0	A0A024R377	PF19627		A0A024R7D3	CL0430		A0A024R0B8	IPR026572
A0A1L1ZFA5	A0A1L1ZFA5_HUMAN	ATP6	2	A0A023I7H5		A0A024R4P3	FPRL1	Formyl peptide receptor-like 1, isoform CRA_a	2		PF00234	Domain	Tryp_alpha_amyl	Protease inhibitor/seed storage/LTP family	CL0482		CL0249	Phage_tail_L	This clan includes the phage minor tail protein L as well as a group of uncharacterised proteins that are also presumably phage components.											IPR000808	Conserved_site	Mrp, conserved site				0	A0A024R386	PF16015		A0A024R7E0	CL0033		A0A024R0B9	IPR022150
A0A1L1ZFK8	A0A1L1ZFK8_HUMAN	ATP6	2	A0A023I7H5		A0A024R4R6	ZNF42	Zinc finger protein 42 (Myeloid-specific retinoic acid-responsive), isoform CRA_a	1		PF00235	Domain	Profilin	Profilin	CL0431		CL0250	GAD	This domain is found as an insert within aspartyl-tRNA synthetase as well as GatB proteins.	[1]. Evolution of aminoacyl-tRNA synthetases--analysis of unique domain architectures and phylogenetic trees reveals a complex history of horizontal gene transfer events. Wolf YI, Aravind L, Grishin NV, Koonin EV Genome Res 9, 689-710, (1999). PMID: 10447505										IPR000827	Conserved_site	CC chemokine, conserved site				0	A0A024R390	PF00076		A0A024R7E2	CL0525		A0A024R0G3	IPR013087
A0A1L1ZHH5	A0A1L1ZHH5_HUMAN	ATP6	2	A0A023I7H5		A0A024R4S4	ZNF542	Zinc finger protein 542, isoform CRA_a	1		PF00236	Domain	Hormone_6	Glycoprotein hormone	CL0079		CL0251	MORN	The MORN (Membrane Occupation and Recognition Nexus) repeat is found in multiple copies in several proteins including junctophilins (See Takeshima et al. Mol. Cell 2000;6:11-22). A MORN-repeat protein has been identified in the parasite Toxoplasma gondiis as dynamic component of cell division apparatus [1]. It has been hypothesised to function as a linker protein between certain membrane regions …	[1]. A MORN-repeat protein is a dynamic component of the Toxoplasma gondii cell division apparatus. Gubbels MJ, Vaishnava S, Boot N, Dubremetz JF, Striepen B J Cell Sci. 119, 2236-2245, (2006). PMID: 16684814										IPR000838	Conserved_site	RNA polymerase sigma factor 70, ECF, conserved site				0	A0A024R390	PF00929		A0A024R7F3	CL0028		A0A024R0G3	IPR036236
A0A1L2EFL1	A0A1L2EFL1_HUMAN	ATP6	2	A0A023I7H5		A0A024R4S6	ZSCAN5	Zinc finger and SCAN domain containing 5, isoform CRA_a	1		PF00237	Domain	Ribosomal_L22	Ribosomal protein L22p/L17e			CL0254	THDP-binding	This clan includes pyruvate dehydrogenases, branched chain alpha-keto acid decarboxylases, phosphoketolases and the pyrimidine binding region of transketolases.	[1]. Characterization of the D-xylulose 5-phosphate/D-fructose 6-phosphate phosphoketolase gene (xfp) from Bifidobacterium lactis. Meile L, Rohr LM, Geissmann TA, Herensperger M, Teuber M J Bacteriol 183, 2929-2936, (2001). PMID: 11292814	[2]. Three-dimensional structure of transketolase, a thiamine diphosphate dependent enzyme, at 2.5 A resolution. Lindqvist Y, Schneider G, Ermler U, Sundstrom M EMBO J 11, 2373-2379, (1992). PMID: 1628611									IPR000842	Conserved_site	Phosphoribosyl pyrophosphate synthetase, conserved site				0	A0A024R395	PF00149		A0A024R7H0	CL0023		A0A024R0G3	IPR039938
A0A1L2EFQ3	A0A1L2EFQ3_HUMAN	ATP6	2	A0A023I7H5		A0A024R4T0	ZNF447	Zinc finger protein 447, isoform CRA_a	1		PF00238	Domain	Ribosomal_L14	Ribosomal protein L14p/L23e			CL0255	ATP_synthase	This clan contains subunits of the F0 complex of ATP-synthase. The F0 complex is the non-catalytic unit of ATPase and is involved in proton translocation across membranes.	[1]. The evolution of A-, F-, and V-type ATP synthases and ATPases: reversals in function and changes in the H+/ATP coupling ratio. Cross RL, Muller V FEBS Lett. 576, 1-4, (2004). PMID: 15473999	[2]. Mechanisms of ATPases--a multi-disciplinary approach. Rappas M, Niwa H, Zhang X Curr Protein Pept Sci. 5, 89-105, (2004). PMID: 15078220									IPR000952	Conserved_site	AB hydrolase 4, conserved site				0	A0A024R395	PF04152		A0A024R7J0	CL0016		A0A024R0I4	IPR006671
A0A1L5YTP0	A0A1L5YTP0_HUMAN	ATP6	2	A0A023I7H5		A0A024R4T8	ZNF499	Zinc finger protein 499, isoform CRA_a	1		PF00239	Domain	Resolvase	Resolvase, N terminal domain			CL0256	Enolase_TIM	This clan contains enzymes which adopt a TIM barrel fold.											IPR000957	Conserved_site	Sulphate/thiosulphate-binding, conserved site				0	A0A024R3A3	PF15012		A0A024R7K0	CL0449		A0A024R0I4	IPR036915
A0A1P8VX91	A0A1P8VX91_HUMAN	ATP6	2	A0A023I7H5		A0A024R4U7	FLJ10945	Uncharacterized protein	1		PF00240	Domain	ubiquitin	Ubiquitin family	CL0072		CL0257	Acetyltrans	This clan contains families related to N-acetyltransferases. N-acetyltransferases catalyse the transfer of acetyl groups from acetyl-CoA to arylamines.	[1]. A second catalytic domain in the Elp3 histone acetyltransferases: a candidate for histone demethylase activity?. Chinenov Y Trends Biochem Sci 27, 115-117, (2002). PMID: 11893502	[2]. Structural comparison between the mitochondrial aralkyl-CoA and arylacetyl-CoA N-acyltransferases. Kelley M, Vessey DA Biochem J 288, 315-317, (1992). PMID: 1445276									IPR000985	Conserved_site	Legume lectin, alpha chain, conserved site				0	A0A024R3A8	PF00076		A0A024R7M3	CL0001		A0A024R0I4	IPR039361
A0A1S5SIJ0	A0A1S5SIJ0_HUMAN	ATP6	2	A0A023I7H5		A0A024R4V3	C22orf8	Chromosome 22 open reading frame 8, isoform CRA_b	1		PF00241	Domain	Cofilin_ADF	Cofilin/tropomyosin-type actin-binding protein	CL0092		CL0258	DALR	Members of this family are anticodon binding domains from various tRNA synthetases.											IPR001006	Conserved_site	Procollagen-lysine 5-dioxygenase, conserved site				0	A0A024R3A9	PF15333		A0A024R7M3	CL0011		A0A024R0J9	IPR001870
A0A1S5SIL8	A0A1S5SIL8_HUMAN	ATP6	2	A0A023I7H5		A0A024R4V7	FLJ20699	Tetratricopeptide repeat protein 38	1		PF00242	Family	DNA_pol_viral_N	DNA polymerase (viral) N-terminal domain			CL0259	OstA	This superfamily includes the OstA family as well as a large family of uncharacterised proteins.											IPR001014	Conserved_site	Ribosomal protein L23/L25, conserved site				0	A0A024R3B4	PF04889		A0A024R7M3	CL0056		A0A024R0J9	IPR003877
A0A1S6M5A7	A0A1S6M5A7_HUMAN	ATP6	2	A0A023I7H5		A0A024R4W0	SAPS2	SAPS domain family, member 2, isoform CRA_a	1		PF00243	Domain	NGF	Nerve growth factor family	CL0079		CL0260	NTP_transf	This clan contains a diverse set of nucleotidyltransferase enzymes.											IPR001018	Conserved_site	Beta-lactamase, class-B, conserved site				0	A0A024R3C2	PF05347		A0A024R7M8	CL0114		A0A024R0J9	IPR013320
A0A1S6M7V2	A0A1S6M7V2_HUMAN	ATP6	2	A0A023I7H5		A0A024R4Y9	C11orf31	Chromosome 11 open reading frame 31	1		PF00244	Repeat	14-3-3	14-3-3 protein	CL0020		CL0261	NUDIX	This superfamily contains the NUDIX family and one related family.	[1]. A Comprehensive Bioinformatics Analysis of the Nudix Superfamily in Arabidopsis thaliana. Gunawardana D, Likic VA, Gayler KR (). PMID: 19590748										IPR001110	Conserved_site	Uncharacterised protein family UPF0012, conserved site				0	A0A024R3C4	PF00630		A0A024R7M9	CL0192		A0A024R0J9	IPR027417
A0A1S6MNK0	A0A1S6MNK0_HUMAN	ATP6	2	A0A023I7H5		A0A024R500	RP3-402G11.12	TraB domain-containing protein	1		PF00245	Domain	Alk_phosphatase	Alkaline phosphatase	CL0088		CL0262	Trigger_C	This helical domain is found in two families of chaperones. It is found at the N terminus of the SurA proteins and at the C-terminus of the trigger factors where presumably it shares a common but as yet unknown function.	[1]. Trigger factor in complex with the ribosome forms a molecular cradle for nascent proteins. Ferbitz L, Maier T, Patzelt H, Bukau B, Deuerling E, Ban N Nature. 431, 590-596, (2004). PMID: 15334087										IPR001131	Conserved_site	Peptidase M24B, X-Pro dipeptidase/aminopeptidase P, conserved site				0	A0A024R3C4	PF05686		A0A024R7N3	CL0449		A0A024R0J9	IPR035778
A0A1S6MX96	A0A1S6MX96_HUMAN	ATP6	2	A0A023I7H5		A0A024R502	NYD-SP21	MS4A13 protein, isoform CRA_b	1		PF00246	Domain	Peptidase_M14	Zinc carboxypeptidase	CL0035		CL0263	His-Me_finger	This superfamily defined originally by SCOP contains a diverse range of endonucleases. Later Grishin identified the MH1 domain as belonging to the superfamily [1].	[1]. Mh1 domain of Smad is a degraded homing endonuclease. Grishin NV J Mol Biol. 307, 31-37, (2001). PMID: 11243801										IPR001196	Conserved_site	Ribosomal protein L15, conserved site				0	A0A024R3F5	PF00096		A0A024R7P5	CL0067		A0A024R0J9	IPR043136
A0A1S6MXM6	A0A1S6MXM6_HUMAN	ATP6	2	A0A023I7H5		A0A024R504	C11orf64	Chromosome 11 open reading frame 64, isoform CRA_a	1		PF00248	Domain	Aldo_ket_red	Aldo/keto reductase family			CL0264	SGNH_hydrolase	This superfamily contains a diversity of hydrolytic enzyme activities.	[1]. GDSL family of serine esterases/lipases. Akoh CC, Lee GC, Liaw YC, Huang TH, Shaw JF Prog Lipid Res. 43, 534-552, (2004). PMID: 15522763	[2]. Crystal structure of Escherichia coli thioesterase I/protease I/lysophospholipase L1: consensus sequence blocks constitute the catalytic center of SGNH-hydrolases through a conserved hydrogen bond network. Lo YC, Lin SC, Shaw JF, Liaw YC J Mol Biol. 330, 539-551, (2003). PMID: 12842470									IPR001226	Conserved_site	Flavodoxin, conserved site				0	A0A024R3F5	PF13894		A0A024R7R0	CL0702		A0A024R0K4	IPR032675
A0A1S6N9W2	A0A1S6N9W2_HUMAN	ATP6	2	A0A023I7H5		A0A024R512	FLJ40629	Cytoskeleton-associated protein 2 C-terminal domain-containing protein	1		PF00249	Domain	Myb_DNA-binding	Myb-like DNA-binding domain	CL0123		CL0265	HIT	The HIT superfamily are a superfamily of nucleotide hydrolases and transferases, which act on the alpha-phosphate of ribonucleotides [1].	[1]. Hint, Fhit, and GalT: function, structure, evolution, and mechanism of three branches of the histidine triad superfamily of nucleotide hydrolases and transferases. Brenner C Biochemistry. 41, 9003-9014, (2002). PMID: 12119013										IPR001261	Conserved_site	ArgE/DapE/ACY1/CPG2/YscS, conserved site				0	A0A024R3G4	PF04116		A0A024R7T3	CL0221		A0A024R0L2	IPR018613
A0A1S6NKE4	A0A1S6NKE4_HUMAN	ATP6	2	A0A023I7H5		A0A024R518	IL1F5	Interleukin-1	2		PF00250	Domain	Forkhead	Forkhead domain	CL0123		CL0266	PH	Members of this clan share a PH-like fold. Many families in this clan bind to short peptide motifs in proteins and are involved in signalling.											IPR001295	Conserved_site	Dihydroorotate dehydrogenase, conserved site				0	A0A024R3G7	PF00069		A0A024R7U5	CL0220		A0A024R0L2	IPR040233
A0A1S6NLX2	A0A1S6NLX2_HUMAN	ATP6	2	A0A023I7H5		A0A024R529	DAK	Triokinase/FMN cyclase, 4.6.1.15, Bifunctional ATP-dependent dihydroxyacetone kinase/FAD-AMP lyase (cyclizing)	2		PF00251	Domain	Glyco_hydro_32N	Glycosyl hydrolases family 32 N-terminal domain	CL0143		CL0267	S11_L18p	This superfamily includes two ribosomal proteins S11 and L18p as well as a domain from eukaryotic peptide chain release factor. This superfamily is likely to share an RNA-binding function.	[1]. The solution structure of ribosomal protein L18 from Thermus thermophilus reveals a conserved RNA-binding fold. Woestenenk EA, Gongadze GM, Shcherbakov DV, Rak AV, Garber MB, Hard T, Berglund H Biochem J. 363, 553-561, (2002). PMID: 11964156										IPR001307	Conserved_site	Thiosulphate sulfurtransferase, conserved site				0	A0A024R3G9	PF12317		A0A024R7V6	CL0023		A0A024R0P7	IPR001909
A0A1S6NPW0	A0A1S6NPW0_HUMAN	ATP6	2	A0A023I7H5		A0A024R539	LOC51035	UBX domain-containing protein 1	2		PF00252	Domain	Ribosomal_L16	Ribosomal protein L16p/L10e			CL0268	Pec_lyase-like	This superfamily all contain a right handed beta helix similar to that first found in pectate lyase [1].	[1]. Structure and evolution of parallel beta-helix proteins. Jenkins J, Mayans O, Pickersgill R J Struct Biol. 122, 236-246, (1998). PMID: 9724625										IPR001326	Conserved_site	Translation elongation factor EF1B, beta/delta chains, conserved site				0	A0A024R3H3	PF08487		A0A024R7V9	CL0072		A0A024R0P7	IPR013087
A0A1S6NS93	A0A1S6NS93_HUMAN	ATP6	2	A0A023I7H5		A0A024R561	HRASLS3	HRAS-like suppressor 3, isoform CRA_a	3		PF00253	Family	Ribosomal_S14	Ribosomal protein S14p/S29e			CL0269	Maf	This superfamily includes the Maf-like proteins and ITPases related to YjjX [1].	[1]. Identification of an ITPase/XTPase in Escherichia coli by structural and biochemical analysis. Zheng J, Singh VK, Jia Z Structure. 13, 1511-1520, (2005). PMID: 16216582										IPR001331	Conserved_site	Guanine-nucleotide dissociation stimulator, CDC24, conserved site				0	A0A024R3H3	PF13768		A0A024R7W0	CL0171		A0A024R0P7	IPR036051
A0A1S6NSM3	A0A1S6NSM3_HUMAN	ATP6	2	A0A023I7H5		A0A024R565	HSPC152	Multifunctional methyltransferase subunit TRM112-like protein, tRNA methyltransferase 112 homolog	1		PF00254	Domain	FKBP_C	FKBP-type peptidyl-prolyl cis-trans isomerase	CL0487		CL0270	Iso_DH	This superfamily of enzymes form dimers and have an active site between the two halves.	[1]. Crystal structure of Escherichia coli PdxA, an enzyme involved in the pyridoxal phosphate biosynthesis pathway. Sivaraman J, Li Y, Banks J, Cane DE, Matte A, Cygler M J Biol Chem. 278, 43682-43690, (2003). PMID: 12896974	[2]. Crystal structure of phosphotransacetylase from the methanogenic archaeon Methanosarcina thermophila. Iyer PP, Lawrence SH, Luther KB, Rajashankar KR, Yennawar HP, Ferry JG, Schindelin H Structure. 12, 559-567, (2004). PMID: 15062079									IPR001363	Conserved_site	Proteinase inhibitor I25C, fetuin, conserved site				0	A0A024R3H5	PF15692		A0A024R7Y5	CL0033		A0A024R0P7	IPR036236
A0A1S6P2C5	A0A1S6P2C5_HUMAN	ATP6	2	A0A023I7H5		A0A024R584	C11orf48	Chromosome 11 open reading frame 48, isoform CRA_b	1		PF00255	Family	GSHPx	Glutathione peroxidase	CL0172		CL0271	F-box	This clan includes classical F-boxes and the PRANC domain found in pox ankyrin proteins.	[1]. F-box-like domains are present in most poxvirus ankyrin repeat proteins. Mercer AA, Fleming SB, Ueda N Virus Genes. 31, 127-133, (2005). PMID: 16025237	[2]. F-box proteins are receptors that recruit phosphorylated substrates to the SCF ubiquitin-ligase complex. Skowyra D, Craig KL, Tyers M, Elledge SJ, Harper JW Cell. 91, 209-219, (1997). PMID: 9346238	[3]. F-box proteins: the key to protein degradation. Ho MS, Tsai PI, Chien CT J Biomed Sci. 13, 181-191, (2006). PMID: 16463014								IPR001412	Conserved_site	Aminoacyl-tRNA synthetase, class I, conserved site				0	A0A024R3K1	PF07686		A0A024R821	CL0186		A0A024R0Q0	IPR019354
A0A1S6P8C1	A0A1S6P8C1_HUMAN	ATP6	2	A0A023I7H5		A0A024R589	FLJ30934	Sorting nexin/Vps5-like C-terminal domain-containing protein	1		PF00257	Family	Dehydrin	Dehydrin			CL0272	RGS	This clan includes RGS domains that possess an alpha helical fold.	[1]. GTPase-activating proteins for heterotrimeric G proteins: regulators of G protein signaling (RGS) and RGS-like proteins. Ross EM, Wilkie TM Annu Rev Biochem. 69, 795-827, (2000). PMID: 10966476										IPR001423	Conserved_site	Lysophospholipase patatin, conserved site				0	A0A024R3L0	PF14968		A0A024R821	CL0221		A0A024R0Q0	IPR027417
A0A1S7C6F1	A0A1S7C6F1_HUMAN	ATP6	2	A0A023I7H5		A0A024R597	HTATIP	Histone acetyltransferase, 2.3.1.48	3		PF00258	Domain	Flavodoxin_1	Flavodoxin	CL0042		CL0273	CYTH	CyaB like adenylyl cyclase and the mammalian thiamine triphosphatases define a novel superfamily of catalytic domains called the CYTH domain that is present in all three superkingdoms of life. The catalytic core of these enzymes contain a novel alpha beta scaffold with 6 conserved acidic residues and 4 basic residues [1].	[1]. The catalytic domains of thiamine triphosphatase and CyaB-like adenylyl cyclase define a novel superfamily of domains that bind organic phosphates. Iyer LM, Aravind L BMC Genomics 3, 33-33, (2002). PMID: 12456267										IPR001426	Conserved_site	Tyrosine-protein kinase, receptor class V, conserved site				0	A0A024R3L5	PF02163		A0A024R847	CL0020		A0A024R0Q0	IPR039177
A0A1S7C7F8	A0A1S7C7F8_HUMAN	ATP6	2	A0A023I7H5		A0A024R5B3	AYP1	AYP1 protein, isoform CRA_b	1		PF00260	Family	Protamine_P1	Protamine P1			CL0274	WRKY-GCM1	WRKY and GCM1 are metal chelating DNA-binding domains (DBD) which share a four stranded fold [1]. We present evidence that they share a stabilising core, which suggests a possible origin from a BED finger-like intermediate that was in turn ultimately derived from a C2H2 Zn-finger domain [1].	[1]. The natural history of the WRKY-GCM1 zinc fingers and the relationship between transcription factors and transposons. Babu MM, Iyer LM, Balaji S, Aravind L (). PMID: 17130173										IPR001468	Conserved_site	Indole-3-glycerol phosphate synthase, conserved site				0	A0A024R3L5	PF17820		A0A024R849	CL0192		A0A024R0Q9	IPR004147
A0A1U9GQ16	A0A1U9GQ16_HUMAN	ATP6	2	A0A023I7H5		A0A024R5B9	MGC11102	Probable RNA-binding protein EIF1AD, Eukaryotic translation initiation factor 1A domain-containing protein	3		PF00261	Coiled-coil	Tropomyosin	Tropomyosin	CL0452		CL0275	HAS-barrel	The HAS barrel is named after HerA-ATP Synthase. In ATP synthases, this domain is implicated in the assembly of the catalytic toroid and docking of accessory subunits, such as the subunit of the ATP synthase complex. Similar roles in docking of the functional partner, the NurA nuclease, and assembly of the HerA toroid complex appear likely for the HAS-barrel of the HerA family [1].	[1]. Comparative genomics of the FtsK-HerA superfamily of pumping ATPases: implications for the origins of chromosome segregation, cell division and viral capsid packaging. Iyer LM, Makarova KS, Koonin EV, Aravind L Nucleic Acids Res. 32, 5260-5279, (2004). PMID: 15466593										IPR001479	Conserved_site	Quinoprotein dehydrogenase, conserved site				0	A0A024R3L8	PF13289		A0A024R878	CL0159		A0A024R0Q9	IPR011009
A0A1U9IH68	A0A1U9IH68_HUMAN	ATP6	2	A0A023I7H5		A0A024R5C6	NAT11	N-alpha-acetyltransferase 40, 2.3.1.257	3		PF00262	Family	Calreticulin	Calreticulin family	CL0004		CL0276	Nucleot_cyclase	This superfamily includes adenylyl cyclase and the GGDEF domain [1].	[1]. GGDEF domain is homologous to adenylyl cyclase. Pei J, Grishin NV Proteins 42, 210-216, (2001). PMID: 11119645										IPR001484	Conserved_site	Pyrokinin, conserved site				0	A0A024R3N1	PF00620		A0A024R887	CL0123		A0A024R0Q9	IPR034646
A0A1U9XM06	A0A1U9XM06_HUMAN	ATP6	2	A0A023I7H5		A0A024R5E5	TCIRG1	V-type proton ATPase subunit a	5		PF00263	Family	Secretin	Bacterial type II and III secretion system protein			CL0277	FAD-oxidase_C	This clan consists of a duplicated subdomain in a variety of FAD-liked oxidase/dehydrogenase enzymes.											IPR001514	Conserved_site	DNA-directed RNA polymerase, 30-40kDa subunit, conserved site				0	A0A024R3N1	PF14604		A0A024R894	CL0004		A0A024R0S9	IPR001609
A0A1V0FTL9	A0A1V0FTL9_HUMAN	ATP6	2	A0A023I7H5		A0A024R5F3	SAPS3	SAPS domain family, member 3, isoform CRA_c	2		PF00264	Domain	Tyrosinase	Common central domain of tyrosinase	CL0205		CL0278	AIG2	The structure consists of a five-stranded beta-barrel surrounded by two alpha-helices and a small beta-sheet. Conservation of residues in a hydrophilic cavity able to bind small ligands in some members suggests that this may also serve as an active site.	[1]. Solution structure of Arabidopsis thaliana protein At5g39720.1, a member of the AIG2-like protein family. Lytle BL, Peterson FC, Tyler EM, Newman CL, Vinarov DA, Markley JL, Volkman BF Acta Crystallograph Sect F Struct Biol Cryst Commun. 62, 490-493, (2006). PMID: 16754964	[2]. 1H, 13C, and 15N resonance assignments for Escherichia coli ytfP, a member of the broadly conserved UPF0131 protein domain family. Aramini JM, Swapna GV, Huang YJ, Rajan PK, Xiao R, Shastry R, Acton TB, Cort JR, Kennedy MA, Montelione GT J Biomol NMR. 33, 197-197, (2005). PMID: 16331424									IPR001522	Conserved_site	Fatty acid desaturase type 1, conserved site				0	A0A024R3N9	PF01301		A0A024R899	CL0123		A0A024R0S9	IPR027417
A0A1V0FTV2	A0A1V0FTV2_HUMAN	ATP6	2	A0A023I7H5		A0A024R5F8	SUV420H1	Suppressor of variegation 4-20 homolog 1 (Drosophila), isoform CRA_a	1		PF00265	Family	TK	Thymidine kinase	CL0023		CL0279	GatB_YqeY	This superfamily includes a domain from GatB as well as one from YqeY. Although being structurally distinct they share a common sequence relationship.											IPR001524	Conserved_site	Glycoside hydrolase, family 6, conserved site				0	A0A024R3U2	PF10263		A0A024R899	CL0537		A0A024R0S9	IPR036961
A0A1V0MBY7	A0A1V0MBY7_HUMAN	ATP6	2	A0A023I7H5		A0A024R5G0	C11orf51	Chromosome 11 open reading frame 51, isoform CRA_a	1		PF00266	Domain	Aminotran_5	Aminotransferase class-V	CL0061		CL0280	PIN	This superfamily contains a variety of nuclease enzymes, including PIN domains and the FLAP exonucleases.	[1]. Comprehensive classification of the PIN domain-like superfamily. Matelska D, Steczkiewicz K, Ginalski K Nucleic Acids Res. 45, 6995-7020, (2017). PMID: 28575517	[2]. Structures of the PIN domains of SMG6 and SMG5 reveal a nuclease within the mRNA surveillance complex. Glavan F, Behm-Ansmant I, Izaurralde E, Conti E EMBO J. 25, 5117-5125, (2006). PMID: 17053788	[3]. Structures of the PIN domains of SMG6 and SMG5 reveal a nuclease within the mRNA surveillance complex. Glavan F, Behm-Ansmant I, Izaurralde E, Conti E EMBO J. 25, 5117-5125, (2006). PMID: 17053788	[4]. The NYN Domains: Novel Predicted RNAses with a PIN Domain-Like Fold. Anantharaman V, Aravind L (). PMID: 17114934							IPR001550	Conserved_site	Transcription antiterminator, conserved site				0	A0A024R3V0	PF07139		A0A024R8B2	CL0220		A0A024R0T1	IPR002347
A0A1V0MC94	A0A1V0MC94_HUMAN	ATP6	2	A0A023I7H5		A0A024R5H3	ORAOV1	Oral cancer overexpressed 1, isoform CRA_a	1		PF00267	Domain	Porin_1	Gram-negative porin	CL0193		CL0281	CCT	This clan includes the CCT motif as well as a related motif that is similar to the first half of the CCT motif.											IPR001562	Conserved_site	Zinc finger, Btk motif				0	A0A024R3X5	PF06743		A0A024R8C7	CL0072		A0A024R0T1	IPR020904
A0A1W5XF73	A0A1W5XF73_HUMAN	ATP6	2	A0A023I7H5		A0A024R5J3	PHCA	Alkaline ceramidase, 3.5.1.-	3		PF00268	Domain	Ribonuc_red_sm	Ribonucleotide reductase, small chain	CL0044		CL0282	Serum_albumin	This superfamily includes serum albumin and related families.											IPR001587	Conserved_site	Ribonuclease J, conserved site				0	A0A024R3X5	PF08368		A0A024R8E4	CL0063		A0A024R0T1	IPR036291
A0A1W5XF98	A0A1W5XF98_HUMAN	ATP6	2	A0A023I7H5		A0A024R5J6	CHCHD8	Coiled-coil-helix-coiled-coil-helix domain containing 8, isoform CRA_a	1		PF00269	Family	SASP	Small, acid-soluble spore proteins, alpha/beta type			CL0283	LigB	This clan includes the LigB subunit of the aromatic ring opening dioxygenase LigAB [1]. The clan also includes the Memo-like proteins.	[1]. Crystal structure of an aromatic ring opening dioxygenase LigAB, a protocatechuate 4,5-dioxygenase, under aerobic conditions. Sugimoto K, Senda T, Aoshima H, Masai E, Fukuda M, Mitsui Y Structure Fold Des 7, 953-965, (1999). PMID: 10467151										IPR001589	Conserved_site	Actinin-type actin-binding domain, conserved site				0	A0A024R3X5	PF08373		A0A024R8I0	CL0033		A0A024R0V8	IPR011893
A0A1W5XFK8	A0A1W5XFK8_HUMAN	ATP6	2	A0A023I7H5		A0A024R5J8	LRRC54	Leucine rich repeat containing 54, isoform CRA_a	3		PF00270	Domain	DEAD	DEAD/DEAH box helicase	CL0023		CL0284	Allatostatin	Allatostatins are pleiotropic neuropeptides. In some insects they are known to inhibit the synthesis of juvenile hormone, an important regulator of development and reproduction. The full role of allatostatins in hormone production is still unclear [1].	[1]. The role of allatostatins in juvenile hormone synthesis in insects and crustaceans. Stay B, Tobe SS Annu Rev Entomol. 52, 277-299, (2007). PMID: 16968202										IPR001598	Conserved_site	Transposase, IS30, conserved site				0	A0A024R3X9	PF03637		A0A024R8I2	CL0214		A0A024R0V8	IPR036249
A0A1W6EIK7	A0A1W6EIK7_HUMAN	ATP6	2	A0A023I7H5		A0A024R5N3	TNFRSF19L	Tumor necrosis factor receptor superfamily, member 19-like, isoform CRA_b	2		PF00271	Domain	Helicase_C	Helicase conserved C-terminal domain	CL0023		CL0285	YycI_YycH	Both, YycH and YycI are always found in a pair on the chromosome, downstream of the essential histidine kinase YycG. Additionally, both proteins share a function in regulating the YycG kinase with which they appear to form a ternary complex. Structural studies show that these two protein families share two related domains.	[1]. The crystal structure of Bacillus subtilis YycI reveals a common fold for two members of an unusual class of sensor histidine kinase regulatory proteins. Santelli E, Liddington RC, Mohan MA, Hoch JA, Szurmant H J Bacteriol. 189, 3290-3295, (2007). PMID: 17307848										IPR001637	Conserved_site	Glutamine synthetase class-I, adenylation site				0	A0A024R3Z4	PF00096		A0A024R8I5	CL0016		A0A024R0W7	IPR001781
A0A1W6EIQ2	A0A1W6EIQ2_HUMAN	ATP6	2	A0A023I7H5		A0A024R5N4	WDR71	WD repeat domain 71, isoform CRA_a	1		PF00272	Family	Cecropin	Cecropin family			CL0286	GCS	This clan represents a superfamily of carboxylate-amine/ammonia ligases [1] that includes Gamma-Glutamylcysteine synthetase (gamma-GCS) and glutamine synthetase (GS). Gamma-Glutamylcysteine synthetase (gamma-GCS) catalyses the first step in the de novo biosynthesis of glutathione.	[1]. Structure prediction and active site analysis of the metal binding determinants in gamma -glutamylcysteine synthetase. Abbott JJ, Pei J, Ford JL, Qi Y, Grishin VN, Pitcher LA, Phillips MA, Grishin NV J Biol Chem. 276, 42099-42107, (2001). PMID: 11527962										IPR001692	Conserved_site	Histidinol dehydrogenase, conserved site				0	A0A024R402	PF10294		A0A024R8I7	CL0228		A0A024R0W7	IPR010442
A0A1W6EKM9	A0A1W6EKM9_HUMAN	ATP6	2	A0A023I7H5		A0A024R5P4	LOC51315	Lysine-rich coiled-coil protein 1	1		PF00273	Domain	Serum_albumin	Serum albumin family	CL0282		CL0287	Transthyretin	This clan unifies several SCOP superfamilies that all share a 7 stranded beta sandwich fold.											IPR001751	Conserved_site	S100/Calcium binding protein 7/8-like, conserved site				0	A0A024R403	PF13621		A0A024R8M6	CL0015		A0A024R0W7	IPR033723
A0A1W6EL90	A0A1W6EL90_HUMAN	ATP6	2	A0A023I7H5		A0A024R5P6	C1orf121	Chromosome 1 open reading frame 121, isoform CRA_b	1		PF00274	Domain	Glycolytic	Fructose-bisphosphate aldolase class-I	CL0035		CL0288	DAP_epimerase	This superfamily includes DAP epimerase and proline racemase as well as the PrpF protein. It has been suggested that this fold may have evolved from the HotDog fold [1].	[1]. Crystal structure of YHI9, the yeast member of the phenazine biosynthesis PhzF enzyme superfamily. Liger D, Quevillon-Cheruel S, Sorel I, Bremang M, Blondeau K, Aboulfath I, Janin J, van Tilbeurgh H, Leulliot N Proteins. 60, 778-786, (2005). PMID: 16021630										IPR001824	Conserved_site	Tyrosine-protein kinase, receptor class III, conserved site				0	A0A024R405	PF15299		A0A024R8Q2	CL0219		A0A024R0W7	IPR033726
A0A1W6EM52	A0A1W6EM52_HUMAN	ATP6	2	A0A023I7H5		A0A024R5Q7	ADSS	Adenylosuccinate synthetase isozyme 2, AMPSase 2, AdSS 2, 6.3.4.4, Adenylosuccinate synthetase, acidic isozyme, Adenylosuccinate synthetase, liver isozyme, L-type adenylosuccinate synthetase, IMP--aspartate ligase 2	4		PF00275	Family	EPSP_synthase	EPSP synthase (3-phosphoshikimate 1-carboxyvinyltransferase)	CL0290		CL0289	FBD	This folate binding domain is found in the GCV T protein as well as the sarcosine oxidase gamma subunit [1].	[1]. Crystal structure of heterotetrameric sarcosine oxidase from Corynebacterium sp. U-96. Ida K, Moriguchi T, Suzuki H Biochem Biophys Res Commun. 333, 359-366, (2005). PMID: 15946648										IPR001827	Conserved_site	Homeobox protein, antennapedia type, conserved site				0	A0A024R411	PF04084		A0A024R8U5	CL0221		A0A024R0W7	IPR033727
A0A1W6EN88	A0A1W6EN88_HUMAN	ATP6	2	A0A023I7H5		A0A024R5R0	KIAA0256	KIAA0256 gene product, isoform CRA_a	1		PF00276	Family	Ribosomal_L23	Ribosomal protein L23			CL0290	EPT_RTPC	This superfamily includes Enolpyruvate transferase (EPT) and RNA 3'-terminal phosphate cyclase (RTPC).											IPR001858	Conserved_site	Phosphatidylethanolamine-binding, conserved site				0	A0A024R422	PF15383		A0A024R8W0	CL0023		A0A024R0W7	IPR047120
A0A1W6EP19	A0A1W6EP19_HUMAN	ATP6	2	A0A023I7H5		A0A024R5S2	CASC4	Cancer susceptibility candidate 4, isoform CRA_a	1		PF00277	Family	SAA	Serum amyloid A protein			CL0291	KNTase_C	This alpha helical domain is found associated with a variety of nucleotidyltransferase domains.											IPR001949	Conserved_site	NADH:ubiquinone oxidoreductase, 51kDa subunit, conserved site				0	A0A024R430	PF15052		A0A024R8W2	CL0229		A0A024R0X0	IPR000261
A0A1W6EPE3	A0A1W6EPE3_HUMAN	ATP6	2	A0A023I7H5		A0A024R5S5	EIF3S1	Eukaryotic translation initiation factor 3 subunit J, eIF3j, Eukaryotic translation initiation factor 3 subunit 1, eIF-3-alpha, eIF3 p35	3		PF00278	Domain	Orn_DAP_Arg_deC	Pyridoxal-dependent decarboxylase, C-terminal sheet domain			CL0292	LysE	This clan includes a diverse range of transporter families [1].	[1]. The LysE superfamily: topology of the lysine exporter LysE of Corynebacterium glutamicum, a paradyme for a novel superfamily of transmembrane solute translocators. Vrljic M, Garg J, Bellmann A, Wachi S, Freudl R, Malecki MJ, Sahm H, Kozina VJ, Eggeling L, Saier MH Jr, Eggeling L, Saier MH Jr J Mol Microbiol Biotechnol. 1, 327-336, (1999). PMID: 10943564										IPR001989	Conserved_site	Radical-activating enzyme, conserved site				0	A0A024R432	PF08613		A0A024R8W9	CL0266		A0A024R0X0	IPR011992
A0A1W6EPF1	A0A1W6EPF1_HUMAN	ATP6	2	A0A023I7H5		A0A024R5T6	ZNF238	Zinc finger protein 238, isoform CRA_a	1		PF00280	Domain	potato_inhibit	Potato inhibitor I family	CL0367		CL0293	CDC	This superfamily includes the MACPF domain as well as the Cholesterol-dependent cytolysins [1].	[1]. A common fold mediates vertebrate defense and bacterial attack. Rosado CJ, Buckle AM, Law RH, Butcher RE, Kan WT, Bird CH, Ung K, Browne KA, Baran K, Bashtannyk-Puhalovich TA, Faux NG, Wong W, Porter CJ, Pike RN, Ellisdon AM, Pearce MC, Bottomley SP, Emsley J, Smith AI, Rossjohn J, Hartland EL, Voskoboinik I, Trapani Science. 317, 1548-1551, (2007). PMID: 17717151										IPR001992	Conserved_site	T2SS_GspF/T4SS_PilC conserved site				0	A0A024R483	PF13886		A0A024R8X4	CL0029		A0A024R0X0	IPR039656
A0A1W6EPZ0	A0A1W6EPZ0_HUMAN	ATP6	2	A0A023I7H5		A0A024R5U3	ARPP-19	Cyclic AMP phosphoprotein, 19 kD, isoform CRA_a	2		PF00281	Domain	Ribosomal_L5	Ribosomal protein L5	CL0652		CL0294	Sec10	This superfamily includes large proteins that are parts of the conserved oligomeric Golgi complex and exocyst complex.											IPR001999	Conserved_site	Osteonectin-like, conserved site				0	A0A024R4A5	PF02213		A0A024R8Y0	CL0188		A0A024R0Z2	IPR001623
A0A1W6ER20	A0A1W6ER20_HUMAN	ATP6	2	A0A023I7H5		A0A024R5U4	C15orf48	Chromosome 15 open reading frame 48, isoform CRA_a	1		PF00282	Domain	Pyridoxal_deC	Pyridoxal-dependent decarboxylase conserved domain	CL0061		CL0295	Vps51	This clan includes an N-terminal domain from several vesicle transport proteins that are related to Vps51.											IPR002011	Conserved_site	Tyrosine-protein kinase, receptor class II, conserved site				0	A0A024R4B0	PF15662		A0A024R8Y7	CL0063		A0A024R0Z2	IPR007829
A0A1W6ER62	A0A1W6ER62_HUMAN	ATP6	2	A0A023I7H5		A0A024R5U5	ADAM10	ADAM metallopeptidase domain 10, isoform CRA_b	5		PF00283	Family	Cytochrom_B559	Cytochrome b559, alpha (gene psbE) and beta (gene psbF)subunits			CL0296	GroES	This superfamily includes the GroES protein as well as the N-terminal GroES-like domain from Alcohol dehydrogenase.	[1]. Conserved structural features and sequence patterns in the GroES fold family. Taneja B, Mande SC Protein Eng 12, 815-818, (1999). PMID: 10556240	[2]. Structural classification of proteins: new superfamilies. Murzin AG Curr Opin Struct Biol 6, 386-394, (1996). PMID: 8804825									IPR002012	Conserved_site	Gonadotropin-releasing hormone				0	A0A024R4B5	PF13695		A0A024R8Z5	CL0141		A0A024R0Z2	IPR036869
A0A1W6ERD6	A0A1W6ERD6_HUMAN	ATP6	2	A0A023I7H5		A0A024R5U8	C15orf15	Chromosome 15 open reading frame 15, isoform CRA_a	2		PF00284	Family	Cytochrom_B559a	Lumenal portion of Cytochrome b559, alpha (gene psbE) subunit			CL0297	PhoU	This superfamily includes PhoU and its relatives that contain a three helical bundle domain structure.											IPR002034	Conserved_site	Alpha-isopropylmalate/homocitrate synthase, conserved site				0	A0A024R4C0	PF20266		A0A024R929	CL0202		A0A024R0Z5	IPR006213
A0A1W6ERS1	A0A1W6ERS1_HUMAN	ATP6	2	A0A023I7H5		A0A024R5U9	C1orf71	Chromosome 1 open reading frame 71, isoform CRA_d	1		PF00285	Domain	Citrate_synt	Citrate synthase, C-terminal domain			CL0298	tRNA_bind_arm	This domain is found in Phe and Ser tRNA synthetases at the N-terminus, and at the C-terminus of Val tRNA synthetase. The domain is composed of two helices.											IPR002047	Conserved_site	Adipokinetic hormone, conserved site				0	A0A024R4F1	PF00113		A0A024R968	CL0137		A0A024R0Z5	IPR006214
A0A1W6ESK1	A0A1W6ESK1_HUMAN	ATP6	2	A0A023I7H5		A0A024R5V9	NARG2	NMDA receptor regulated 2, isoform CRA_b	2		PF00286	Domain	Flexi_CP	Viral coat protein			CL0299	Peptidase_SF	This clan includes the peptidase S24 and S26 families. These families adopt a mainly beta fold. Members of the family S24 have an additional C-terminal domain containing a bundle of three helices presumably important for binding DNA.	[1]. Crystal structure of LexA: a conformational switch for regulation of self-cleavage. Luo Y, Pfuetzner RA, Mosimann S, Paetzel M, Frey EA, Cherney M, Kim B, Little JW, Strynadka NC Cell. 106, 585-594, (2001). PMID: 11551506	[2]. Crystallization of a soluble, catalytically active form of Escherichia coli leader peptidase. Paetzel M, Chernaia M, Strynadka N, Tschantz W, Cao G, Dalbey RE, James MN Proteins. 23, 122-125, (1995). PMID: 8539246									IPR002052	Conserved_site	DNA methylase, N-6 adenine-specific, conserved site				0	A0A024R4F1	PF03952		A0A024R993	CL0011		A0A024R115	IPR036514
A0A1W6HW45	A0A1W6HW45_HUMAN	ATP6	2	A0A023I7H5		A0A024R5W1	SUHW4	Suppressor of hairy wing homolog 4 (Drosophila), isoform CRA_a	1		PF00287	Family	Na_K-ATPase	Sodium / potassium ATPase beta chain	CL0159		CL0300	TAT	This motif is found in a wide range of secreted proteins. It is named after the conserved pair of arginines that is followed by a hydrophobic stretch.	[1]. A common export pathway for proteins binding complex redox cofactors?. Berks BC Mol Microbiol. 22, 393-404, (1996). PMID: 8939424	[2]. The Tat protein export pathway. Berks BC, Sargent F, Palmer T Mol Microbiol. 35, 260-274, (2000). PMID: 10652088									IPR002057	Conserved_site	Isopenicillin N synthase, conserved site				0	A0A024R4F5	PF06534		A0A024R993	CL0022		A0A024R118	IPR013216
A0A1X9MK73	A0A1X9MK73_HUMAN	ATP6	2	A0A023I7H5		A0A024R5X9	C15orf20	Chromosome 15 open reading frame 20, isoform CRA_a	1		PF00288	Family	GHMP_kinases_N	GHMP kinases N terminal domain	CL0329		CL0301	PA14	This clan includes the PA14 domain and related families.	[1]. The PA14 domain, a conserved all-beta domain in bacterial toxins, enzymes, adhesins and signaling molecules. Rigden DJ, Mello LV, Galperin MY Trends Biochem Sci. 29, 335-339, (2004). PMID: 15236739										IPR002080	Conserved_site	Seminal vesicle protein II, conserved site				0	A0A024R4F5	PF06535		A0A024R996	CL0016		A0A024R118	IPR029063
A0A1X9MM07	A0A1X9MM07_HUMAN	ATP6	2	A0A023I7H5		A0A024R5Y9	ZNF588	Zinc finger protein 588, isoform CRA_d	1		PF00289	Domain	Biotin_carb_N	Biotin carboxylase, N-terminal domain	CL0483		CL0302	Arginase	This superfamily includes arginase enzymes as well as histone deacetylases and related enzymes [1].	[1]. Evolution of the arginase fold and functional diversity. Dowling DP, Costanzo LD, Gennadios HA, Christianson DW (). PMID: 18360740										IPR002173	Conserved_site	Carbohydrate/purine kinase, PfkB, conserved site				0	A0A024R4G9	PF17687		A0A024R9B1	CL0613		A0A024R123	IPR014830
A0A1X9MMM4	A0A1X9MMM4_HUMAN	ATP6	2	A0A023I7H5		A0A024R5Z9	PKM2	Pyruvate kinase, 2.7.1.40	3		PF00290	Domain	Trp_syntA	Tryptophan synthase alpha chain	CL0036		CL0303	H2TH	This domain is thought to play a role in binding nucleic acids. It is DNA binding in nucleases and RNA-binding in ribosomal S13.											IPR002194	Conserved_site	Chaperonin TCP-1, conserved site				0	A0A024R4J0	PF00096		A0A024R9B8	CL0035		A0A024R123	IPR036497
A0A1X9Y8Y6	A0A1X9Y8Y6_HUMAN	ATP6	2	A0A023I7H5		A0A024R611	CORO1A	Coronin	5		PF00291	Family	PALP	Pyridoxal-phosphate dependent enzyme	CL0063		CL0304	CheY	This clan includes the CheY-like response regulators from bacteria [1-2].	[1]. Response regulators of bacterial signal transduction systems: selective domain shuffling during evolution. Pao GM, Saier MH J Mol Evol 40, 136-154, (1995). PMID: 7699720	[2]. Structural classification of bacterial response regulators: diversity of output domains and domain combinations. Galperin MY J Bacteriol. 188, 4169-4182, (2006). PMID: 16740923									IPR002195	Conserved_site	Dihydroorotase, conserved site				0	A0A024R4J0	PF01352		A0A024R9C0	CL0238		A0A024R128	IPR012445
A0A218N9E9	A0A218N9E9_HUMAN	ATP6	2	A0A023I7H5		A0A024R618	LOC124446	Testicular tissue protein Li 203	1		PF00292	Domain	PAX	'Paired box' domain	CL0123		CL0305	PTH2	This clan includes Peptidyl-tRNA hydrolase II as well as a large family of uncharacterised proteins called DUF2000. A structure for DUF2000 shows a similar structure to PTH2. It is not clear if the DUF2000 family are also Peptidyl-tRNA hydrolases. Both families contain a conserved positively charged residue close to the amino terminus that may be part of the active site.											IPR002204	Conserved_site	3-hydroxyisobutyrate dehydrogenase-related, conserved site				0	A0A024R4L8	PF01352		A0A024R9H2	CL0534		A0A024R131	IPR025927
A0A342DH40	A0A342DH40_HUMAN	ATP6	2	A0A023I7H5		A0A024R643	KIAA1008	KIAA1008, isoform CRA_b	1		PF00293	Domain	NUDIX	NUDIX domain	CL0261		CL0306	HeH	This superfamily includes protein domains with the helix-extended loop-helix (HeH) structure.	[1]. NMR structure of the N-terminal domain of SUMO ligase PIAS1 and its interaction with tumor suppressor p53 and A/T-rich DNA oligomers. Okubo S, Hara F, Tsuchida Y, Shimotakahara S, Suzuki S, Hatanaka H, Yokoyama S, Tanaka H, Yasuda H, Shindo H J Biol Chem. 279, 31455-31461, (2004). PMID: 15133049										IPR002328	Conserved_site	Alcohol dehydrogenase, zinc-type, conserved site				0	A0A024R4P3	PF00001		A0A024R9I8	CL0125		A0A024R131	IPR026316
A0A342LF18	A0A342LF18_HUMAN	ATP6	2	A0A023I7H5		A0A024R654	C14orf108	AP-5 complex subunit mu-1, Adaptor-related protein complex 5 subunit mu-1	2		PF00294	Domain	PfkB	pfkB family carbohydrate kinase	CL0118		CL0307	FUSC	Members of this clan are likely to be integral membrane bound transporters.											IPR002358	Conserved_site	Ribosomal protein L6, conserved site				0	A0A024R4R6	PF00096		A0A024R9J4	CL0079		A0A024R141	IPR000169
A0A342LFK0	A0A342LFK0_HUMAN	ATP6	2	A0A023I7H5		A0A024R656	RAD51L1	RAD51-like 1 (S. cerevisiae), isoform CRA_a	1		PF00295	Repeat	Glyco_hydro_28	Glycosyl hydrolases family 28	CL0268		CL0308	DMSO_reductase	This clan includes members that are type II dimethyl sulfoxide reductase families, all of which are also membrane anchor proteins belonging to the iron-sulfur molybdoenzyme (CISM) family [1].	[1]. The prokaryotic complex iron-sulfur molybdoenzyme family. Rothery RA, Workun GJ, Weiner JH Biochim Biophys Acta. 1778, 1897-1929, (2008). PMID: 17964535										IPR002359	Conserved_site	Ribosomal protein L6, conserved site-2				0	A0A024R4R6	PF02023		A0A024R9J4	CL0451		A0A024R141	IPR000668
A0A342LG06	A0A342LG06_HUMAN	ATP6	2	A0A023I7H5		A0A024R658	ZFP36L1	mRNA decay activator protein ZFP36, Zinc finger protein 36	5		PF00296	Domain	Bac_luciferase	Luciferase-like monooxygenase			CL0310	DinB	This superfamily are thought to be metalloenzymes. They possess a four helical bundle core structure with a beta hairpin. Members of the superfamily have a predicted active site composed of three histidines that chelate Nickel or Zinc. In some cases these histidines are replaced with Aspartate or Glutamate. Mostly they form a dimeric structure. The dinB gene is one of the DNA-damage-induced genes…	[1]. The structure of DinB from Geobacillus stearothermophilus: a representative of a unique four-helix-bundle superfamily. Cooper DR, Grelewska K, Kim CY, Joachimiak A, Derewenda ZS Acta Crystallogr Sect F Struct Biol Cryst Commun. 66, 219-224, (2010). PMID: 20208147										IPR002361	Conserved_site	Antenna complex, alpha subunit conserved site				0	A0A024R4S4	PF00096		A0A024R9J4	CL0547		A0A024R141	IPR013128
A0A342LGG2	A0A342LGG2_HUMAN	ATP6	2	A0A023I7H5		A0A024R666	C14orf100	Chromosome 14 open reading frame 100, isoform CRA_a	1		PF00297	Family	Ribosomal_L3	Ribosomal protein L3	CL0575		CL0311	SCP2	This superfamily includes the SCP2 family as well as a domain from the mycothiol dependent maleylpyruvate isomerase.											IPR002363	Conserved_site	Ribosomal protein L10, eubacterial, conserved site				0	A0A024R4S6	PF00096		A0A024R9J4	CL0692		A0A024R141	IPR013201
A0A342Y3K8	A0A342Y3K8_HUMAN	ATP6	2	A0A023I7H5		A0A024R667	C14orf150	WD repeat-containing protein 89	1		PF00298	Domain	Ribosomal_L11	Ribosomal protein L11, RNA binding domain			CL0312	HemS_ChuX	This superfamily includes HemS and ChuX like protein families.											IPR002364	Conserved_site	Quinone oxidoreductase/zeta-crystallin, conserved site				0	A0A024R4S6	PF02023		A0A024R9J6	CL0229		A0A024R141	IPR025660
A0A342Y6V2	A0A342Y6V2_HUMAN	ATP6	2	A0A023I7H5		A0A024R687	PLEKHC1	Pleckstrin homology domain containing, family C (With FERM domain) member 1, isoform CRA_b	3		PF00299	Domain	Squash	Squash family serine protease inhibitor	CL0096		CL0314	PP-binding	[1]. Acyl carrier protein: structure-function relationships in a conserved multifunctional protein family. Byers DM, Gong H Biochem Cell Biol. 85, 649-662, (2007). PMID: 18059524	[2]. Structural basis for substrate delivery by acyl carrier protein in the yeast fatty acid synthase. Leibundgut M, Jenni S, Frick C, Ban N Science. 316, 288-290, (2007). PMID: 17431182										IPR002365	Conserved_site	Terpene synthase, conserved site				0	A0A024R4S6	PF12874		A0A024R9K7	CL0287		A0A024R141	IPR025661
A0A342Y8N9	A0A342Y8N9_HUMAN	ATP6	2	A0A023I7H5		A0A024R689	C14orf43	Chromosome 14 open reading frame 43, isoform CRA_a	1		PF00300	Domain	His_Phos_1	Histidine phosphatase superfamily (branch 1)	CL0071		CL0315	Gx_transp	This superfamily includes a wide range of transporters that contain many conserved glycine residues in the presumed transmembrane regions.											IPR002464	Conserved_site	DNA/RNA helicase, ATP-dependent, DEAH-box type, conserved site				0	A0A024R4T0	PF02023		A0A024R9M8	CL0015		A0A024R141	IPR038765
A0A342YEA2	A0A342YEA2_HUMAN	ATP6	2	A0A023I7H5		A0A024R6A3	PSEN1	Presenilin, 3.4.23.-	5		PF00301	Domain	Rubredoxin	Rubredoxin	CL0045		CL0316	Acyl_transf_3	This superfamily includes a wide variety of integral membrane acyltransferase enzymes that often acylate sugars.											IPR003006	Conserved_site	Immunoglobulin/major histocompatibility complex, conserved site				0	A0A024R4T8	PF00096		A0A024R9M9	CL0220		A0A024R141	IPR039417
A0A342YGS3	A0A342YGS3_HUMAN	ATP6	2	A0A023I7H5		A0A024R6D8	SFRS5	Splicing factor, arginine/serine-rich 5, isoform CRA_a	2		PF00302	Domain	CAT	Chloramphenicol acetyltransferase	CL0149		CL0317	Multiheme_cytos	This family includes cytochromes that contain multiple CxxCH motifs.											IPR003043	Conserved_site	Uroporphiryn-III C-methyltransferase, conserved site				0	A0A024R4T8	PF00651		A0A024R9Q8	CL0066		A0A024R154	IPR000326
A0A342YML4	A0A342YML4_HUMAN	ATP6	2	A0A023I7H5		A0A024R6E4	C14orf118	Chromosome 14 open reading frame 118, isoform CRA_d	1		PF00303	Domain	Thymidylat_synt	Thymidylate synthase			CL0318	Cytochrome-c	This family includes proteins where a covalently-bound haem completes the core. The core is three helices in an open folded leaf formation. The members are monodomain cytochromes.											IPR003109	Conserved_site	GoLoco motif				0	A0A024R4V3	PF13289		A0A024R9Q8	CL0073		A0A024R154	IPR036938
A0A342YQJ1	A0A342YQJ1_HUMAN	ATP6	2	A0A023I7H5		A0A024R6E6	C14orf140	Chromosome 14 open reading frame 140, isoform CRA_a	1		PF00304	Domain	Gamma-thionin	Gamma-thionin family	CL0054		CL0319	SHS2	SHS2 is a novel domain with a simple fold containing a core of 3 strands, forming a curved sheet, and a single helix in a strand-helix-strand-strand (SHS2) configuration [1]. SHS2 is found in the bacterial cell division ATPase FtsA, the archaeo-eukaryotic RNA polymerase subunit Rpb7p, the GyrI superfamily, and the uncharacterized MTH1598/Tm1083-like proteins [1]. The fold exists as single copy ve…	[1]. The SHS2 module is a common structural theme in functionally diverse protein groups, like Rpb7p, FtsA, GyrI, and MTH1598/TM1083 superfamilies. Anantharaman V, Aravind L Proteins. 56, 795-807, (2004). PMID: 15281131	[2]. The first structure from the SOUL/HBP family of heme-binding proteins, murine P22HBP. Dias JS, Macedo AL, Ferreira GC, Peterson FC, Volkman BF, Goodfellow BJ J Biol Chem. 281, 31553-31561, (2006). PMID: 16905545	[3]. Predicted role for the archease protein family based on structural and sequence analysis of TM1083 and MTH1598, two proteins structurally characterized through structural genomics efforts. Canaves JM Proteins. 56, 19-27, (2004). PMID: 15162483	[4]. Crystal structure of halophilic dodecin: a novel, dodecameric flavin binding protein from Halobacterium salinarum. Bieger B, Essen LO, Oesterhelt D Structure. 11, 375-385, (2003). PMID: 12679016							IPR003527	Conserved_site	Mitogen-activated protein (MAP) kinase, conserved site				0	A0A024R4W0	PF04499		A0A024R9Q8	CL0159		A0A024R154	IPR043216
A0A342YQN0	A0A342YQN0_HUMAN	ATP6	2	A0A023I7H5		A0A024R6F2	FLJ11806	Zinc finger CCCH domain-containing protein 14	2		PF00305	Domain	Lipoxygenase	Lipoxygenase			CL0320	PepSY	This family includes the PepSY domain as well as a family of uncharacterised proteins.											IPR003528	Conserved_site	Long hematopoietin receptor, single chain, conserved site				0	A0A024R500	PF01963		A0A024R9R5	CL0186		A0A024R158	IPR003395
A0A343DTF5	A0A343DTF5_HUMAN	ATP6	2	A0A023I7H5		A0A024R6F8	C14orf44	Chromosome 14 open reading frame 44, isoform CRA_a	1		PF00306	Domain	ATP-synt_ab_C	ATP synthase alpha/beta chain, C terminal domain			CL0321	PLAT	This domain has an 8-stranded sandwich structure.											IPR003529	Conserved_site	Long hematopoietin receptor, Gp130 family 2, conserved site				0	A0A024R512	PF15297		A0A024R9R7	CL0023		A0A024R158	IPR010935
A0A343DW54	A0A343DW54_HUMAN	ATP6	2	A0A023I7H5		A0A024R6G0	TCL6	T-cell leukemia/lymphoma 6, isoform CRA_b	1		PF00307	Domain	CH	Calponin homology (CH) domain	CL0188		CL0322	RND_permease	Different members of the RND superfamily have been shown to transport hydrophobic drugs, fatty acids, bile salts, organic solvents, heavy metals, autoinducers and lipooligosaccharides in bacteria [1].	[1]. The RND permease superfamily: an ancient, ubiquitous and diverse family that includes human disease and development proteins. Tseng TT, Gratwick KS, Kollman J, Park D, Nies DH, Goffeau A, Saier MH Jr J Mol Microbiol Biotechnol. 1, 107-125, (1999). PMID: 10941792										IPR003530	Conserved_site	Long hematopoietin receptor, soluble alpha chain, conserved site				0	A0A024R518	PF00340		A0A024R9S7	CL0020		A0A024R158	IPR024704
A0A343DWP9	A0A343DWP9_HUMAN	ATP6	2	A0A023I7H5		A0A024R6H6	FAM35A	Family with sequence similarity 35, member A, isoform CRA_a	1		PF00308	Domain	Bac_DnaA	Bacterial dnaA protein	CL0023		CL0323	Patatin	This superfamily of enzymes contains a Ser/Asp catalytic dyad. Members of this superfamily are all serine acylhydrolase enzymes.	[1]. Properties of the Group IV phospholipase A2 family. Ghosh M, Tucker DE, Burchett SA, Leslie CC Prog Lipid Res. 45, 487-510, (2006). PMID: 16814865										IPR003531	Conserved_site	Short hematopoietin receptor, family 1, conserved site				0	A0A024R529	PF02733		A0A024R9S7	CL0126		A0A024R158	IPR027120
A0A343DYI6	A0A343DYI6_HUMAN	ATP6	2	A0A023I7H5		A0A024R6H7	C14orf68	Chromosome 14 open reading frame 68, isoform CRA_b	1		PF00309	Family	Sigma54_AID	Sigma-54 factor, Activator interacting domain (AID)			CL0324	Homing_endonuc	This superfamily includes a variety of LAGLIDADG-like homing endonuclease like families.	[1]. Homing endonuclease structure and function. Stoddard BL Q Rev Biophys. 38, 49-95, (2005). PMID: 16336743										IPR003532	Conserved_site	Short hematopoietin receptor, family 2, conserved site				0	A0A024R529	PF02734		A0A024R9V3	CL0020		A0A024R158	IPR027417
A0A343E084	A0A343E084_HUMAN	ATP6	2	A0A023I7H5		A0A024R6I1	CHES1	Forkhead box protein N3	2		PF00310	Domain	GATase_2	Glutamine amidotransferases class-II	CL0052		CL0325	Form_Glyc_dh	This superfamily includes the catalytic domain of a variety of dehydrogenase enzymes. The domain has a flavodoxin-like fold and contains an inserted Rossman fold NAD-binding domain.											IPR003651	Conserved_site	Endonuclease III-like, iron-sulphur cluster loop motif				0	A0A024R539	PF00627		A0A024R9W3	CL0221		A0A024R158	IPR036277
A0A343E133	A0A343E133_HUMAN	ATP6	2	A0A023I7H5		A0A024R6K8	WARS	Tryptophan--tRNA ligase, cytoplasmic, 6.1.1.2, Tryptophanyl-tRNA synthetase	2		PF00311	Family	PEPcase	Phosphoenolpyruvate carboxylase	CL0151		CL0326	Reo_sigma	This superfamily includes virus attachment proteins that share a common beta sandwich domain.	[1]. The reovirus sigma1 aspartic acid sandwich: a trimerization motif poised for conformational change. Schelling P, Guglielmi KM, Kirchner E, Paetzold B, Dermody TS, Stehle T J Biol Chem. 282, 11582-11589, (2007). PMID: 17303562	[2]. Structural evidence for common functions and ancestry of the reovirus and adenovirus attachment proteins. Stehle T, Dermody TS Rev Med Virol. 13, 123-132, (2003). PMID: 12627395	[3]. Crystal structure of reovirus attachment protein sigma1 reveals evolutionary relationship to adenovirus fiber. Chappell JD, Prota AE, Dermody TS, Stehle T EMBO J. 21, 1-11, (2002). PMID: 11782420								IPR003903	Conserved_site	Ubiquitin interacting motif				0	A0A024R539	PF00789		A0A024RA24	CL0229		A0A024R161	IPR001623
A0A343E4V9	A0A343E4V9_HUMAN	ATP6	2	A0A023I7H5		A0A024R6M2	KIAA2010	KIAA2010, isoform CRA_a	2		PF00312	Domain	Ribosomal_S15	Ribosomal protein S15	CL0600		CL0327	Pilus	This clan contains bacterial and archaeal systems involved in flagellar or twitching motility, adhesion, protein secretion, and DNA uptake, such as type II secretion system (T2SS), the type IV pilus or the competence pilus (Com) [4]. Pili proteins enable the transfer of plasmid between bacteria. The families in this clan adopt an alpha helical structure which is packed against a beta sheet [2-3].	[1]. Pili in gram-positive pathogens. Telford JL, Barocchi MA, Margarit I, Rappuoli R, Grandi G Nat Rev Microbiol. 4, 509-519, (2006). PMID: 16778837	[2]. NMR structure of a type IVb pilin from Salmonella typhi and its assembly into pilus. Xu XF, Tan YW, Lam L, Hackett J, Zhang M, Mok YK J Biol Chem. 279, 31599-31605, (2004). PMID: 15159389	[3]. Crystal structure of Pseudomonas aeruginosa PAK pilin suggests a main-chain-dominated mode of receptor binding. Hazes B, Sastry PA, Hayakawa K, Read RJ, Irvin RT J Mol Biol. 299, 1005-1017, (2000). PMID: 10843854	[4]. Diversification of the type IV filament superfamily into machines for adhesion, protein secretion, DNA uptake, and motility. Denise R, Abby SS, Rocha EPC (). PMID: 31323028							IPR003956	Conserved_site	Transcription factor, NFYB/HAP3, conserved site				0	A0A024R561	PF04970		A0A024RA25	CL0010		A0A024R161	IPR001770
A0A343E8D9	A0A343E8D9_HUMAN	ATP6	2	A0A023I7H5		A0A024R6M5	C14orf142	Chromosome 14 open reading frame 142, isoform CRA_a	1		PF00313	Domain	CSD	'Cold-shock' DNA-binding domain	CL0021		CL0328	2heme_cytochrom	This superfamily includes a variety of different heme binding cytochromes.											IPR003960	Conserved_site	ATPase, AAA-type, conserved site				0	A0A024R565	PF03966		A0A024RA25	CL0023		A0A024R161	IPR015898
A0A343E936	A0A343E936_HUMAN	ATP6	2	A0A023I7H5		A0A024R6N3	C14orf2	Chromosome 14 open reading frame 2, isoform CRA_c	1		PF00314	Domain	Thaumatin	Thaumatin family	CL0293		CL0329	S5	This superfamily contains a wide range of families that possess a structure similar to the second domain of ribosomal S5 protein.	[1]. Crystal structure of the tRNA processing enzyme RNase PH from Aquifex aeolicus. Ishii R, Nureki O, Yokoyama S J Biol Chem. 278, 32397-32404, (2003). PMID: 12746447										IPR004001	Conserved_site	Actin, conserved site				0	A0A024R584	PF15317		A0A024RA25	CL0466		A0A024R161	IPR036284
A0A343EA37	A0A343EA37_HUMAN	ATP6	2	A0A023I7H5		A0A024R6P6	C14orf129	Chromosome 14 open reading frame 129, isoform CRA_a	1		PF00316	Domain	FBPase	Fructose-1-6-bisphosphatase, N-terminal domain	CL0171		CL0330	AVL9	Members of this clan are involved in vesicle formation/trafficking.	[1]. Avl9p, a member of a novel protein superfamily, functions in the late secretory pathway. Harsay E, Schekman R Mol Biol Cell. 18, 1203-1219, (2007). PMID: 17229886	[2]. Connecdenn, a novel DENN domain-containing protein of neuronal clathrin-coated vesicles functioning in synaptic vesicle endocytosis. Allaire PD, Ritter B, Thomas S, Burman JL, Denisov AY, Legendre-Guillemin V, Harper SQ, Davidson BL, Gehring K, McPherson PS J Neurosci. 26, 13202-13212, (2006). PMID: 17182770									IPR004011	Conserved_site	GYR motif				0	A0A024R589	PF09325		A0A024RA25	CL0614		A0A024R161	IPR036869
A0A343ECE3	A0A343ECE3_HUMAN	ATP6	2	A0A023I7H5		A0A024R6Q2	C14orf172	tRNA (adenine(58)-N(1))-methyltransferase catalytic subunit TRMT61A, 2.1.1.220	2		PF00317	Domain	Ribonuc_red_lgN	Ribonucleotide reductase, all-alpha domain			CL0331	EpsM	These families are involved in the general secretory pathways of bacteria and are normally membrane-bound.											IPR004019	Conserved_site	YLP motif				0	A0A024R597	PF01853		A0A024RA36	CL0330		A0A024R161	IPR044632
A0A343ED40	A0A343ED40_HUMAN	ATP6	2	A0A023I7H5		A0A024R6Q4	LOC400258	Nutritionally-regulated adipose and cardiac enriched protein homolog	1		PF00318	Family	Ribosomal_S2	Ribosomal protein S2	CL0067		CL0332	AcetylDC-like	These families are double psi-beta barrel structures.											IPR004027	Conserved_site	SEC-C motif				0	A0A024R597	PF11717		A0A024RA58	CL0293		A0A024R163	IPR000504
A0A343EF68	A0A343EF68_HUMAN	ATP6	2	A0A023I7H5		A0A024R6R3	ORC6L	Origin recognition complex, subunit 6 homolog-like (Yeast), isoform CRA_a	2		PF00319	Domain	SRF-TF	SRF-type transcription factor (DNA-binding and dimerisation domain)			CL0333	gCrystallin	This superfamily includes a number of mammalian crystallins as well as ancestral beta gamma-crystallin precursor structures.											IPR004036	Conserved_site	Endonuclease III-like, conserved site-2				0	A0A024R597	PF17772		A0A024RA60	CL0051		A0A024R163	IPR006536
A0A343F3Y3	A0A343F3Y3_HUMAN	ATP6	2	A0A023I7H5		A0A024R6S6	FTS	Fused toes homolog (Mouse), isoform CRA_c	1		PF00320	Domain	GATA	GATA zinc finger	CL0167		CL0334	THBO-biosyn	The families in this clan bind purine or ptein in topologically similar sites between subunits.											IPR004037	Conserved_site	Ribosomal protein L7Ae conserved site				0	A0A024R5B3	PF08615		A0A024RA73	CL0022		A0A024R163	IPR012677
A0A343F577	A0A343F577_HUMAN	ATP6	2	A0A023I7H5		A0A024R6T8	NIP30	NEFA-interacting nuclear protein NIP30, isoform CRA_a	2		PF00321	Domain	Thionin	Plant thionin			CL0335	FumRed-TM	This superfamily constitutes two distinct families: in one family the common fold is contained in a single-chain subunit, in the other it is formed by two chains.											IPR004840	Conserved_site	Amino acid permease, conserved site				0	A0A024R5B9	PF01176		A0A024RA73	CL0023		A0A024R163	IPR021790
A0A343F678	A0A343F678_HUMAN	ATP6	2	A0A023I7H5		A0A024R6V6	C16orf57	U6 snRNA phosphodiesterase, 3.1.4.-	3		PF00322	Family	Endothelin	Endothelin family			CL0336	FMN-binding	This includes those related to the ferredoxin reductase-like FAD-binding domain and those that are Pyridoxine 5'-phosphate oxidase (PNP)-like.											IPR004845	Conserved_site	Type II secretion system protein GspD, conserved site				0	A0A024R5C6	PF00583		A0A024RA73	CL0041		A0A024R163	IPR033110
A0A343F6R0	A0A343F6R0_HUMAN	ATP6	2	A0A023I7H5		A0A024R6W4	LIN10	Lin-10 homolog (C. elegans), isoform CRA_b	1		PF00323	Domain	Defensin_1	Mammalian defensin	CL0075		CL0337	RF	These families are peptide chain release factors.											IPR005486	Conserved_site	Glucokinase regulatory protein, conserved site				0	A0A024R5E5	PF01496		A0A024RA73	CL0123		A0A024R163	IPR034326
A0A343F8H1	A0A343F8H1_HUMAN	ATP6	2	A0A023I7H5		A0A024R6W8	LRRC29	Leucine rich repeat containing 29, isoform CRA_a	1		PF00324	Domain	AA_permease	Amino acid permease	CL0062		CL0339	PFL-like	The N- and C-terminal halves of the structure have similar topologies but in some cases only one is represented by the members here, viz; the C-terminal domain of the R1 subunit of ribonucleotide reductase, and the N-terminal of PFL. The full-length structure is modelled by NRDD.											IPR005803	Conserved_site	Fatty acid desaturase type 2, conserved site				0	A0A024R5F3	PF04499		A0A024RA77	CL0072		A0A024R163	IPR035979
A0A343FBU1	A0A343FBU1_HUMAN	ATP6	2	A0A023I7H5		A0A024R6Z7	DUS2L	Dihydrouridine synthase 2-like, SMM1 homolog (S. cerevisiae), isoform CRA_a	2		PF00325	Domain	Crp	Bacterial regulatory proteins, crp family	CL0123		CL0340	PTase-anion_tr	The families here are the cytoplasmic regions of anion transporter proteins.											IPR005825	Conserved_site	Ribosomal protein L24/L26, conserved site				0	A0A024R5G0	PF15243		A0A024RA80	CL0172		A0A024R171	IPR028002
A0A343FCC3	A0A343FCC3_HUMAN	ATP6	2	A0A023I7H5		A0A024R702	CGI-38	Brain specific protein, isoform CRA_a	1		PF00326	Domain	Peptidase_S9	Prolyl oligopeptidase family	CL0028		CL0341	LDH_C	This superfamily includes the C-terminal domain of lactate/malate dehydrogenase as well as the C-terminal domain of the glycosyl hydrolase 4 family.											IPR005829	Conserved_site	Sugar transporter, conserved site				0	A0A024R5H3	PF09811		A0A024RA81	CL0137		A0A024R172	IPR011032
A0A343FD07	A0A343FD07_HUMAN	ATP6	2	A0A023I7H5		A0A024R716	FLJ13576	Transmembrane protein 168	2		PF00327	Domain	Ribosomal_L30	Ribosomal protein L30p/L7e			CL0342	TolB_N	Members of this superfamily appear to behave like the N-terminal fold of the TolB transport-portal complex protein, which is beta-stranded.											IPR005831	Conserved_site	Aerolysin/haemolysin toxin, conserved site				0	A0A024R5J3	PF05875		A0A024RA85	CL0016		A0A024R172	IPR013149
A0A343FEB2	A0A343FEB2_HUMAN	ATP6	2	A0A023I7H5		A0A024R718	PBEF1	Nicotinamide phosphoribosyltransferase, NAmPRTase, 2.4.2.12	3		PF00328	Family	His_Phos_2	Histidine phosphatase superfamily (branch 2)	CL0071		CL0343	MHC	This superfamily includes all the Class I-related antigen-recognition domain families.											IPR005836	Conserved_site	ADP-glucose pyrophosphorylase, conserved site				0	A0A024R5J8	PF13855		A0A024RAA1	CL0141		A0A024R172	IPR014190
A0A343FEV7	A0A343FEV7_HUMAN	ATP6	2	A0A023I7H5		A0A024R731	NAG6	Coiled-coil domain-containing protein 136	2		PF00329	Family	Complex1_30kDa	Respiratory-chain NADH dehydrogenase, 30 Kd subunit			CL0344	4Fe-4S	Superfamily includes proteins containing domains which bind to iron-sulfur clusters. Members include bacterial ferredoxins, various dehydrogenases and various reductases. The structure of the domain is an alpha-antiparallel beta sandwich.											IPR005853	Conserved_site	Omega-agatoxin type II/III, conserved site				0	A0A024R5N3	PF12606		A0A024RAA7	CL0100		A0A024R172	IPR020843
A0A343FIE2	A0A343FIE2_HUMAN	ATP6	2	A0A023I7H5		A0A024R737	NAPE-PLD	N-acyl-phosphatidylethanolamine-hydrolyzing phospholipase D, 3.1.4.54	5		PF00330	Family	Aconitase	Aconitase family (aconitate hydratase)			CL0345	Aerolisin_ETX	This superfamily includes pore-forming venoms and toxins from bacteria, plants, insects and fish.											IPR005918	Conserved_site	Conantokin, conserved site				0	A0A024R5N4	PF00400		A0A024RAB1	CL0145		A0A024R172	IPR036291
A0A343FIQ9	A0A343FIQ9_HUMAN	ATP6	2	A0A023I7H5		A0A024R746	IPLA2(GAMMA)	Intracellular membrane-associated calcium-independent phospholipase A2 gamma, isoform CRA_a	2		PF00331	Domain	Glyco_hydro_10	Glycosyl hydrolase family 10	CL0058		CL0346	Ribo_L29	Superfamily includes Ribosomal protein L29 family and its corresponding mitochondrial ribosomal family, L47.											IPR006012	Conserved_site	Syntaxin/epimorphin, conserved site				0	A0A024R5P6	PF05903		A0A024RAB1	CL0266		A0A024R172	IPR041694
A0A343FJP7	A0A343FJP7_HUMAN	ATP6	2	A0A023I7H5		A0A024R751	HSPC049	WD repeat-containing protein 91	2		PF00332	Domain	Glyco_hydro_17	Glycosyl hydrolases family 17	CL0058		CL0347	Tetraspannin	This clan includes the tetraspanin family which contains four transmembrane regions. The CD20 family also has four transmembrane regions, but its members are not considered true tetraspanins as they lack nearly all of the key functional tetraspanin residues [1].	[1]. Specific tetraspanin functions. Hemler ME J Cell Biol. 155, 1103-1107, (2001). PMID: 11756464										IPR006040	Conserved_site	Allergen Ole e 1, conserved site				0	A0A024R5Q7	PF00709		A0A024RAB1	CL0465		A0A024R172	IPR045010
A0A343FK27	A0A343FK27_HUMAN	ATP6	2	A0A023I7H5		A0A024R762	HSPC268	Uncharacterized protein	1		PF00333	Domain	Ribosomal_S5	Ribosomal protein S5, N-terminal domain	CL0196		CL0348	Phage_tail	Families involved in joining the tail to the head of the phage as well as those completing the head are included herein.											IPR006061	Conserved_site	Solute-binding family 1, conserved site				0	A0A024R5R0	PF01248		A0A024RAB4	CL0088		A0A024R183	IPR000719
A0A343FQV0	A0A343FQV0_HUMAN	ATP6	2	A0A023I7H5		A0A024R771	FLJ35834	Ubiquitin-like domain-containing protein	2		PF00334	Domain	NDK	Nucleoside diphosphate kinase			CL0349	SLOG	Members of the SLOG superfamily were shown in bacteria and plants to cleave modified AMPs to release the base as cytokinins, which function as growth-stimulating hormones in plants. Known family members such as DprA is a member of the recombination-mediator protein family, dedicated to natural bacterial transformation [1]. This clan includes members such as the classical LOG family which generate…	[1]. A key presynaptic role in transformation for a widespread bacterial protein: DprA conveys incoming ssDNA to RecA. Mortier-Barriere I, Velten M, Dupaigne P, Mirouze N, Pietrement O, McGovern S, Fichant G, Martin B, Noirot P, Le Cam E, Polard P, Claverys JP Cell. 130, 824-836, (2007). PMID: 17803906	[2]. Comparative genomic analyses reveal a vast, novel network of nucleotide-centric systems in biological conflicts, immunity and signaling. Burroughs AM, Zhang D, Schaffer DE, Iyer LM, Aravind L Nucleic Acids Res. 43, 10633-10654, (2015). PMID: 26590262									IPR006074	Conserved_site	GTP1/OBG, conserved site				0	A0A024R5S5	PF08597		A0A024RAB9	CL0100		A0A024R183	IPR008271
A0A343FU83	A0A343FU83_HUMAN	ATP6	2	A0A023I7H5		A0A024R7A6	PLXNA4B	Plexin A4, B, isoform CRA_b	3		PF00335	Family	Tetraspanin	Tetraspanin family	CL0347		CL0350	PRC-barrel	The PRC-barrel is an all beta barrel domain found in the photosynthetic reaction centre subunit H of the purple bacteria [1].	[1]. The PRC-barrel: a widespread, conserved domain shared by photosynthetic reaction center subunits and proteins of RNA metabolism. Anantharaman V, Aravind L (). PMID: 12429060										IPR006089	Conserved_site	Acyl-CoA dehydrogenase, conserved site				0	A0A024R5T6	PF00651		A0A024RAC6	CL0271		A0A024R183	IPR011009
A0A343FX73	A0A343FX73_HUMAN	ATP6	2	A0A023I7H5		A0A024R7B2	EDG5	Endothelial differentiation, sphingolipid G-protein-coupled receptor, 5, isoform CRA_a	2		PF00336	Family	DNA_pol_viral_C	DNA polymerase (viral) C-terminal domain			CL0351	CHCH	The conserved [coiled coil 1]-[helix 1]-[coiled coil 2]-[helix 2] domain (CHCH domain) superfamily members include NADH-ubiquinone oxidoreductases, some cytochrome oxidases and yeast mitochondrial ribosomal proteins. Within each helix of the CHCH domain there are two cysteines present in a C-X9-C motif.											IPR006105	Conserved_site	Cereal seed allergen/trypsin and alpha-amylase inhibitor, conserved site				0	A0A024R5U3	PF04667		A0A024RAG6	CL0100		A0A024R183	IPR017441
A0A343FXC6	A0A343FXC6_HUMAN	ATP6	2	A0A023I7H5		A0A024R7C4	FLJ12949	Protein KRI1 homolog	1		PF00337	Domain	Gal-bind_lectin	Galactoside-binding lectin	CL0004		CL0352	EsxAB	The WXG100 protein secretion system (Wss) is responsible for the secretion of WXG100 proteins (PF06013), such as ESAT-10 (6 kDa early secreted antigenic target) and CFP-10 (10 kDa culture filtrate protein) in Mycobacterium tuberculosis or EsxA (ESAT-6-like extracellularly secreted protein A) and EsxB in Staphylococcus aureus. These two proteins, generally encoded in the same gene cluster, form a …	[1]. ESX/type VII secretion systems and their role in host-pathogen interaction. Simeone R, Bottai D, Brosch R Curr Opin Microbiol. 12, 4-10, (2009). PMID: 19155186	[2]. EsxA and EsxB are secreted by an ESAT-6-like system that is required for the pathogenesis of Staphylococcus aureus infections. Burts ML, Williams WA, DeBord K, Missiakas DM Proc Natl Acad Sci U S A. 102, 1169-1174, (2005). PMID: 15657139	[3]. Outer membrane translocation: numerical protein secretion nomenclature in question in mycobacteria. Desvaux M, Hebraud M, Talon R, Henderson IR Trends Microbiol. 17, 338-340, (2009). PMID: 19674902	[4]. New insights into the distribution of WXG100 protein secretion systems. Sutcliffe IC Antonie Van Leeuwenhoek. 99, 127-131, (2011). PMID: 20852931	[5]. Secretion and subcellular localizations of bacterial proteins: a semantic awareness issue. Desvaux M, Hebraud M, Talon R, Henderson IR Trends Microbiol. 17, 139-145, (2009). PMID: 19299134						IPR006117	Conserved_site	2-5-oligoadenylate synthetase, C-terminal conserved site				0	A0A024R5U4	PF06522		A0A024RAH2	CL0221		A0A024R187	IPR006879
A0A343FXT2	A0A343FXT2_HUMAN	ATP6	2	A0A023I7H5		A0A024R7D3	UNQ501	Transmembrane protein 205	1		PF00338	Domain	Ribosomal_S10	Ribosomal protein S10p/S20e			CL0353	TIMP-like	This superfamily consists of the C-terminal domains of netrins, complement proteins C3, C4, C5, secreted frizzled-related proteins, and type I procollagen C-proteinase enhancer proteins, as well as the homologous N-terminal domains of tissue inhibitors of metalloproteinases (TIMPs).											IPR006118	Conserved_site	Recombinase, conserved site				0	A0A024R5U5	PF00200		A0A024RAJ5	CL0209		A0A024R187	IPR011330
A0A343G302	A0A343G302_HUMAN	ATP6	2	A0A023I7H5		A0A024R7E0	BTBD14B	BTB (POZ) domain containing 14B, isoform CRA_a	2		PF00339	Domain	Arrestin_N	Arrestin (or S-antigen), N-terminal domain	CL0135		CL0354	bBprotInhib	Superfamily consists of both metalloprotease- inhibitors and staphostatins.											IPR006126	Conserved_site	Staphylococcal enterotoxin/Streptococcal pyrogenic exotoxin, conserved site				0	A0A024R5U5	PF01562		A0A024RAJ5	CL0266		A0A024R188	IPR029675
A0A343GAC6	A0A343GAC6_HUMAN	ATP6	2	A0A023I7H5		A0A024R7E2	LPPR2	Lipid phosphate phosphatase-related protein type 2, isoform CRA_a	1		PF00340	Domain	IL1	Interleukin-1 / 18	CL0066		CL0355	CheC-like	The chemotactic response regulator superfamily are CheY-P phosphatases. Their structure is two intertwined alpha-beta-(X)-beta(2) motifs. This superfamily comprises two classes of proteins each shown to interact with the chemotaxis response regulator CheY: the FliM switch proteins and the CheC-type phosphatases [1]. FliM is a component of the flagellar switch found across the bacteria and is resp…	[1]. The diverse CheC-type phosphatases: chemotaxis and beyond. Muff TJ, Ordal GW Mol Microbiol. 70, 1054-1061, (2008). PMID: 18990184										IPR006144	Conserved_site	Secretion protein HlyD, conserved site				0	A0A024R5U5	PF13574		A0A024RAL1	CL0001		A0A024R1A2	IPR001965
A0A343GAF2	A0A343GAF2_HUMAN	ATP6	2	A0A023I7H5		A0A024R7F3	ABHD9	Abhydrolase domain containing 9, isoform CRA_a	1		PF00341	Domain	PDGF	PDGF/VEGF domain	CL0079		CL0356	AMP_N-like	Bacterial amino-peptidases and creatinases, where the fold is a ribonuclease H-like motif, are grouped in this superfamily.											IPR006146	Conserved_site	5'-Nucleotidase, conserved site				0	A0A024R5U8	PF01246		A0A024RAL1	CL0011		A0A024R1A2	IPR011011
A0A343GAN0	A0A343GAN0_HUMAN	ATP6	2	A0A023I7H5		A0A024R7H0	DDX39	RNA helicase, 3.6.4.13	2		PF00342	Domain	PGI	Phosphoglucose isomerase	CL0067		CL0357	SMAD-FHA	Superfamily members carry a few short helices inserted in loops within the 11 strands in 2 sheets (greek-key) of the parent fold.											IPR006180	Conserved_site	3-hydroxyacyl-CoA dehydrogenase, conserved site				0	A0A024R5U9	PF15281		A0A024RAL1	CL0056		A0A024R1A2	IPR013083
A0A343GAR9	A0A343GAR9_HUMAN	ATP6	2	A0A023I7H5		A0A024R7H7	BCNP1	B-cell novel protein 1, isoform CRA_b	1		PF00343	Family	Phosphorylase	Carbohydrate phosphorylase	CL0113		CL0359	Intron-mat_II	Superfamily includes a variety of transcription factors that bind intron RNA during reverse transcription and splicing.											IPR006181	Conserved_site	D-amino acid oxidase, conserved site				0	A0A024R5V9	PF10505		A0A024RAQ1	CL0021		A0A024R1A2	IPR019542
A0A343GCT4	A0A343GCT4_HUMAN	ATP6	2	A0A023I7H5		A0A024R7I9	MGC2747	Uncharacterized protein	1		PF00344	Family	SecY	SecY	CL0376		CL0360	MTH1187-YkoF	Putative cell-wall biogenesis proteins and HMP-binding proteins, all with the same Ferredoxin fold, are included in this superfamily.											IPR006203	Conserved_site	GHMP kinase, ATP-binding, conserved site				0	A0A024R5W1	PF13836		A0A024RAQ7	CL0721		A0A024R1A2	IPR019786
A0A343GCX3	A0A343GCX3_HUMAN	ATP6	2	A0A023I7H5		A0A024R7J0	PRKACA	cAMP-dependent protein kinase, 2.7.11.11	5		PF00345	Domain	PapD_N	Pili and flagellar-assembly chaperone, PapD N-terminal domain	CL0556		CL0361	C2H2-zf	Superfamily of classical and closely related C2H2 or beta-beta-alpha zinc finger DNA-binding domains.											IPR006213	Conserved_site	Bax inhibitor 1, conserved site				0	A0A024R5Y9	PF00096		A0A024RAR3	CL0516		A0A024R1A2	IPR019787
A0A343GFF7	A0A343GFF7_HUMAN	ATP6	2	A0A023I7H5		A0A024R7K0	SFRS14	Splicing factor, arginine/serine-rich 14, isoform CRA_a	1		PF00346	Family	Complex1_49kDa	Respiratory-chain NADH dehydrogenase, 49 Kd subunit			CL0362	RAMPS-Cas5-like	This group of families is one of several protein families that are always found associated with prokaryotic CRISPRs, themselves a family of clustered regularly interspaced short palindromic repeats, DNA repeats found in nearly half of all bacterial and archaeal genomes. These DNA repeat regions have a remarkably regular structure: unique sequences of constant size, called spacers, sit between eac…	[1]. A guild of 45 CRISPR-associated (Cas) protein families and multiple CRISPR/Cas subtypes exist in prokaryotic genomes. Haft DH, Selengut J, Mongodin EF, Nelson KE (). PMID: 16292354	[2]. Small CRISPR RNAs guide antiviral defense in prokaryotes. Brouns SJ, Jore MM, Lundgren M, Westra ER, Slijkhuis RJ, Snijders AP, Dickman MJ, Makarova KS, Koonin EV, van der Oost J Science. 321, 960-964, (2008). PMID: 18703739	[3]. CRISPR--a widespread system that provides acquired resistance against phages in bacteria and archaea. Sorek R, Kunin V, Hugenholtz P Nat Rev Microbiol. 6, 181-186, (2008). PMID: 18157154								IPR006216	Conserved_site	Photosystem II cytochrome b559, conserved site				0	A0A024R5Z9	PF00224		A0A024RAR8	CL0126		A0A024R1A2	IPR034732
A0A343GG67	A0A343GG67_HUMAN	ATP6	2	A0A023I7H5		A0A024R7K2	MGC26694	Solute carrier family 25 member 42	2		PF00347	Domain	Ribosomal_L6	Ribosomal protein L6			CL0363	H-int	This superfamily includes Hedgehog C-terminal (Hog) autoprocessing domain and Intein (protein splicing domain) families.											IPR006224	Conserved_site	Pseudouridine synthase, RluA-like, conserved site				0	A0A024R5Z9	PF02887		A0A024RAR8	CL0159		A0A024R1A2	IPR039550
A0A343GG80	A0A343GG80_HUMAN	ATP6	2	A0A023I7H5		A0A024R7K6	FKSG24	Mpv17-like protein 2	1		PF00348	Domain	polyprenyl_synt	Polyprenyl synthetase	CL0613		CL0364	Leu-IlvD	Superfamily includes LeuD-like, IlvD/EDD C-terminal domain-like, and AF0055-like families.											IPR006311	Conserved_site	Twin-arginine translocation pathway, signal sequence				0	A0A024R611	PF00400		A0A024RAR8	CL0672		A0A024R1A3	IPR000011
A0A343GGA6	A0A343GGA6_HUMAN	ATP6	2	A0A023I7H5		A0A024R7L2	HSPC142	BRISC and BRCA1-A complex member 1, Mediator of RAP80 interactions and targeting subunit of 40 kDa, New component of the BRCA1-A complex	3		PF00349	Domain	Hexokinase_1	Hexokinase	CL0108		CL0365	MurF-HprK_N	This includes both the MurE/MurF-ligases N-terminal domain and HPr kinase/phosphatase HprK N-terminal domain superfamilies.											IPR006653	Conserved_site	Tryptophan synthase, beta chain, conserved site				0	A0A024R611	PF08953		A0A024RAS2	CL0012		A0A024R1A3	IPR000594
A0A343GID4	A0A343GID4_HUMAN	ATP6	2	A0A023I7H5		A0A024R7L4	C19orf4	Chromosome 19 open reading frame 4, isoform CRA_a	1		PF00350	Domain	Dynamin_N	Dynamin family	CL0023		CL0366	JAB	This superfamily includes a number of proteasome regulatory subunits, eukaryotic initiation factor 3 (eIF3) subunits, regulators of transcription factors and ubiquitination-assisting protein families. In eukaryotes and in prokaryotic cognates of the ubiquitin-based modification pathway, they function as ubiquitin isopeptidases/ deubiquitinases. JAB domains are also found in diverse metabolic path…											IPR006655	Conserved_site	Molybdopterin oxidoreductase, prokaryotic, conserved site				0	A0A024R611	PF08954		A0A024RAT6	CL0063		A0A024R1A3	IPR018074
A0A343GJ31	A0A343GJ31_HUMAN	ATP6	2	A0A023I7H5		A0A024R7L6	LOC93343	Multivesicular body subunit 12A, ESCRT-I complex subunit MVB12A, Protein FAM125A	2		PF00351	Domain	Biopterin_H	Biopterin-dependent aromatic amino acid hydroxylase			CL0367	CI-2	This superfamily includes a range of universally found subtilases, that are serine proteases.											IPR006686	Conserved_site	Mechanosensitive ion channel MscS, conserved site				0	A0A024R611	PF16300		A0A024RAW7	CL0063		A0A024R1A3	IPR018075
A0A343GK97	A0A343GK97_HUMAN	ATP6	2	A0A023I7H5		A0A024R7M2	MGC2749	KxDL motif-containing protein 1	1		PF00352	Domain	TBP	Transcription factor TFIID (or TATA-binding protein, TBP)	CL0407		CL0368	PhosC-NucP1	This superfamily includes the Phospholipase C and P1-nuclease families.											IPR006690	Conserved_site	Outer membrane protein, OmpA-like, conserved site				0	A0A024R618	PF14940		A0A024RAZ7	CL0221		A0A024R1A3	IPR018965
A0A343GM21	A0A343GM21_HUMAN	ATP6	2	A0A023I7H5		A0A024R7M3	CSPG3	Chondroitin sulfate proteoglycan 3 (Neurocan), isoform CRA_a	2		PF00353	Repeat	HemolysinCabind	RTX calcium-binding nonapeptide repeat (4 copies)	CL0592		CL0369	GHD	This domain is C-terminal to the catalytic beta/alpha barrel domain. The superfamily includes the C-terminal domain of a number of sugar-lytic families.											IPR007121	Conserved_site	RNA polymerase, beta subunit, conserved site				0	A0A024R643	PF00773		A0A024RB03	CL0154		A0A024R1A3	IPR019572
A0A343GPC7	A0A343GPC7_HUMAN	ATP6	2	A0A023I7H5		A0A024R7M8	LOC115098	Coiled-coil domain-containing protein 124	2		PF00354	Domain	Pentaxin	Pentaxin family	CL0004		CL0370	Uteroglobin	Members of this superfamily are disulfide-linked dimers of two identical chains, with 4 helices in each. They constitute important new cat, rat and rabbit allergens that are contributing to asthma world-wide.											IPR007166	Conserved_site	Class III signal peptide motif				0	A0A024R643	PF17215		A0A024RB16	CL0154		A0A024R1A3	IPR032418
A0A343GQA2	A0A343GQA2_HUMAN	ATP6	2	A0A023I7H5		A0A024R7M9	EDG4	Endothelial differentiation, lysophosphatidic acid G-protein-coupled receptor, 4, isoform CRA_a	1		PF00355	Domain	Rieske	Rieske [2Fe-2S] domain	CL0516		CL0371	Inovirus-Coat	Superfamily contains a number of filamentous phage coat-protein families.											IPR007577	Conserved_site	Glycosyltransferase, DXD sugar-binding motif				0	A0A024R643	PF17216		A0A024RB16	CL0648		A0A024R1A3	IPR032420
A0A343GQC8	A0A343GQC8_HUMAN	ATP6	2	A0A023I7H5		A0A024R7N3	SF4	Splicing factor 4, isoform CRA_a	1		PF00356	Domain	LacI	Bacterial regulatory proteins, lacI family	CL0123		CL0372	Hy-ly_N	This contains virus envelope protein, Chondroitin AC lyase and hyaluronate lyase families.											IPR007858	Conserved_site	Dpy-30 motif				0	A0A024R643	PF17849		A0A024RB35	CL0100		A0A024R1A3	IPR033127
A0A343GQG7	A0A343GQG7_HUMAN	ATP6	2	A0A023I7H5		A0A024R7P5	LOC388524	Similar to Laminin receptor 1, isoform CRA_a	1		PF00357	Family	Integrin_alpha	Integrin alpha cytoplasmic region			CL0373	Phage-coat	A number of different phage coat-proteins are collected together in this superfamily.											IPR008142	Conserved_site	Alanine dehydrogenase/NAD(P) transhydrogenase, conserved site-1				0	A0A024R654	PF00928		A0A024RB48	CL0154		A0A024R1A3	IPR035985
A0A343GQY6	A0A343GQY6_HUMAN	ATP6	2	A0A023I7H5		A0A024R7R0	RAP80	BRCA1-A complex subunit RAP80, Receptor-associated protein 80, Ubiquitin interaction motif-containing protein 1	3		PF00358	Domain	PTS_EIIA_1	phosphoenolpyruvate-dependent sugar phosphotransferase system, EIIA 1	CL0105		CL0374	PEP-carboxyk	This includes the PEP carboxykinase C-terminal domain and HPr kinase HprK C-terminal domain families.											IPR008143	Conserved_site	Alanine dehydrogenase/pyridine nucleotide transhydrogenase, conserved site-2				0	A0A024R656	PF08423		A0A024RB48	CL0266		A0A024R1A3	IPR038252
A0A343GR12	A0A343GR12_HUMAN	ATP6	2	A0A023I7H5		A0A024R7R5	FLJ10404	FAM193 C-terminal domain-containing protein	1		PF00359	Domain	PTS_EIIA_2	Phosphoenolpyruvate-dependent sugar phosphotransferase system, EIIA 2	CL0340		CL0375	Transporter	Members of this superfamily normally carry four transmembrane regions, which in many instances associate into hexameric structures. They are frequently involved in gap-junction formation between cells or in forming pores linking the cytosol with the extracellular space [1,2]. Some of them are transporters proteins, including members of the TCDB superfamilies 1.A.24 and 1.A.25.	[1]. Sequence and phylogenetic analyses of 4 TMS junctional proteins of animals: connexins, innexins, claudins and occludins. Hua VB, Chang AB, Tchieu JH, Kumar NM, Nielsen PA, Saier MH Jr J Membr Biol. 194, 59-76, (2003). PMID: 14502443	[2]. LRRC8 proteins share a common ancestor with pannexins, and may form hexameric channels involved in cell-cell communication. Abascal F, Zardoya R Bioessays. 34, 551-560, (2012). PMID: 22532330									IPR008150	Conserved_site	Phytoene dehydrogenase, bacterial-type, conserved site				0	A0A024R658	PF00642		A0A024RB48	CL0541		A0A024R1A3	IPR042063
A0A343GRA3	A0A343GRA3_HUMAN	ATP6	2	A0A023I7H5		A0A024R7R9	SLC34A1	Solute carrier family 34 (Sodium phosphate), member 1, isoform CRA_b	5		PF00360	Domain	PHY	Phytochrome region	CL0161		CL0376	Oxa1	The cytochrome oxidase biogenesis families are membrane transporters akin to the E coli protein YidC. For those proteins whose N-termini must reside in the intermembrane space, export is mediated by the Oxa1p export machinery, machinery that depends upon the membrane potential. Qxa1p homologues are found in all living organisms. TCDB:2.A.9.											IPR008193	Conserved_site	DNA-directed RNA polymerase Rpb11, 13-16kDa subunit, conserved site				0	A0A024R658	PF04553		A0A024RB55	CL0023		A0A024R1A3	IPR042302
A0A343GRE2	A0A343GRE2_HUMAN	ATP6	2	A0A023I7H5		A0A024R7T3	HNRPF	Heterogeneous nuclear ribonucleoprotein F, isoform CRA_a	2		PF00361	Family	Proton_antipo_M	Proton-conducting membrane transporter	CL0425		CL0377	FAH	Superfamily contains fumarylacetoacetate hydrolase and related enzymes,											IPR008284	Conserved_site	Molybdenum cofactor biosynthesis, conserved site				0	A0A024R666	PF05571		A0A024RB55	CL0465		A0A024R1A3	IPR042449
A0A343GRJ4	A0A343GRJ4_HUMAN	ATP6	2	A0A023I7H5		A0A024R7U5	EFCAB1	EF-hand calcium binding domain 1, isoform CRA_b	1		PF00362	Domain	Integrin_beta	Integrin beta chain VWA domain	CL0128		CL0378	ANL	This superfamily consists of enzymes including luciferase, long chain fatty acid Co-A ligase, acetyl-CoA synthetase and various other closely-related synthetases as well as a plant auxin-responsive promoter family. The name ANL derives from from three of the subfamilies - Acyl-CoA synthetases, the NRPS adenylation domains, and the Luciferase enzymes [1]. Members of this superfamily catalyse the i…	[1]. Conformational dynamics in the Acyl-CoA synthetases, adenylation domains of non-ribosomal peptide synthetases, and firefly luciferase. Gulick AM ACS Chem Biol. 4, 811-827, (2009). PMID: 19610673										IPR008918	Conserved_site	Helix-hairpin-helix motif, class 2				0	A0A024R667	PF00400		A0A024RB56	CL0361		A0A024R1A3	IPR045886
A0A343GRN3	A0A343GRN3_HUMAN	ATP6	2	A0A023I7H5		A0A024R7V5	C8orf72	Chromosome 8 open reading frame 72, isoform CRA_a	1		PF00363	Family	Casein	Casein			CL0379	PgaPase	This is a collection of pyrrolidone carboxyl peptidase or pyroglutamate aminopeptidase families from bacteria and archaea.											IPR009535	Conserved_site	Phospholipase C-beta, conserved site				0	A0A024R687	PF00169		A0A024RB57	CL0361		A0A024R1B8	IPR018616
A0A343GRT5	A0A343GRT5_HUMAN	ATP6	2	A0A023I7H5		A0A024R7V6	RAB2	RAB2, member RAS oncogene family, isoform CRA_a	1		PF00364	Domain	Biotin_lipoyl	Biotin-requiring enzyme	CL0105		CL0380	IDO-like	Superfamily contains bacterial tryptophan 2,3-dioxygenase and indoleamine 2,3-dioxygenase-like families.											IPR010133	Conserved_site	Bacteriocin-type signal sequence				0	A0A024R687	PF00373		A0A024RB89	CL0021		A0A024R1C5	IPR031630
A0A343GRY7	A0A343GRY7_HUMAN	ATP6	2	A0A023I7H5		A0A024R7V9	ANUBL1	AN1, ubiquitin-like, homolog (Xenopus laevis), isoform CRA_a	1		PF00365	Domain	PFK	Phosphofructokinase	CL0240		CL0381	Metallo-HOrase	This superfamily of enzymes including beta-lactamases, thiolesterases, members of the glyoxalase II family that catalyse the hydrolysis of S-D-lactoyl-glutathione to form glutathione and D-lactic acid all bind two ions of zinc. An additional family of competence proteins essential for natural transformation do not appear to bind zinc, and might be a transporter involved in DNA uptake.	[1]. The 3-D structure of a zinc metallo-beta-lactamase from Bacillus cereus reveals a new type of protein fold. Carfi A, Pares S, Duee E, Galleni M, Duez C, Frere JM, Dideberg O EMBO J 14, 4914-4921, (1995). PMID: 7588620										IPR010810	Conserved_site	Flagellin hook, IN motif				0	A0A024R687	PF18124		A0A024RBA2	CL0039		A0A024R1C8	IPR001806
A0A343GSM1	A0A343GSM1_HUMAN	ATP6	2	A0A023I7H5		A0A024R7W0	IMPAD1	Inositol monophosphatase domain containing 1, isoform CRA_a	3		PF00366	Domain	Ribosomal_S17	Ribosomal protein S17	CL0021		CL0382	DNA-mend	This is a superfamily of DNA recombinases, topoisomerases and integrases.											IPR010916	Conserved_site	TonB box, conserved site				0	A0A024R689	PF01448		A0A024RBA2	CL0172		A0A024R1C8	IPR027417
A0A343GSX5	A0A343GSX5_HUMAN	ATP6	2	A0A023I7H5		A0A024R7W3	C8orf44	Chromosome 8 open reading frame 44, isoform CRA_a	1		PF00367	Domain	PTS_EIIB	phosphotransferase system, EIIB			CL0383	PheT-TilS	Families here are thought to contain a putative tRNA-binding structural motif. The families are the C-terminal domains of tRNA-Ile-lysidine and the phenylalanine-tRNA synthetases.											IPR010917	Conserved_site	TonB-dependent receptor, conserved site				0	A0A024R6A3	PF01080		A0A024RBA2	CL0497		A0A024R1D4	IPR043220
A0A343GT14	A0A343GT14_HUMAN	ATP6	2	A0A023I7H5		A0A024R7Y5	TCEB1	Elongin-C	1		PF00368	Family	HMG-CoA_red	Hydroxymethylglutaryl-coenzyme A reductase			CL0384	PLC	Superfamily consists of Glycerophosphoryl diester phosphodiesterase and phosphatidylinositol-specific phospholipase C families.											IPR011062	Conserved_site	Contryphan, conserved site				0	A0A024R6D8	PF00076		A0A024RBC0	CL0053		A0A024R1D8	IPR000239
A0A343GTX6	A0A343GTX6_HUMAN	ATP6	2	A0A023I7H5		A0A024R803	FLJ20397	Dynein assembly factor 5, axonemal	1		PF00370	Domain	FGGY_N	FGGY family of carbohydrate kinases, N-terminal domain	CL0108		CL0385	Hydrophilin	This superfamily includes plant and bacterial hydrophilin families.	[1]. Functional dissection of hydrophilins during in vitro freeze protection. Reyes JL, Campos F, Wei H, Arora R, Yang Y, Karlson DT, Covarrubias AA Plant Cell Environ. 31, 1781-1790, (2008). PMID: 18761701										IPR011142	Conserved_site	Spider toxin CSTX, Knottin scaffold conserved site				0	A0A024R6F2	PF14608		A0A024RBC3	CL0022		A0A024R1D8	IPR000719
A0A343GUB9	A0A343GUB9_HUMAN	ATP6	2	A0A023I7H5		A0A024R806	MGC10911	Uncharacterized protein	1		PF00372	Domain	Hemocyanin_M	Hemocyanin, copper containing domain	CL0205		CL0387	DHFred	Superfamily contains the dihydrofolate reductases and the RibD C-terminal domain-like including HTP reductase families.											IPR011695	Conserved_site	Tash protein, PEST motif				0	A0A024R6F8	PF10595		A0A024RBC7	CL0137		A0A024R1D8	IPR000961
A0A343GW05	A0A343GW05_HUMAN	ATP6	2	A0A023I7H5		A0A024R821	EIF3S9	Eukaryotic translation initiation factor 3 subunit B, eIF3b, Eukaryotic translation initiation factor 3 subunit 9, eIF-3-eta	3		PF00373	Domain	FERM_M	FERM central domain	CL0632		CL0388	FadR-C	Superfamily includes C-terminal domain ligand-binding GntR families and families of fatty acid responsive transcription factors. This C-terminal domain, an antiparallel array of six alpha helices, forms a barrel-like structure, while a seventh alpha helix forms a 'lid' at the end closest to the N-terminal domain - a separate, DNA-binding winged-helix, domain.											IPR012321	Conserved_site	Conotoxin, omega-type, conserved site				0	A0A024R6H7	PF00153		A0A024RBF9	CL0412		A0A024R1D8	IPR001849
A0A343GYZ5	A0A343GYZ5_HUMAN	ATP6	2	A0A023I7H5		A0A024R836	MGC11257	WKF domain-containing protein	1		PF00374	Family	NiFeSe_Hases	Nickel-dependent hydrogenase			CL0389	TRAF	Superfamily has a circularly permuted immunoglobulin-fold topology with extra an extra beta-strand. Families include the Math and the SIAH, or Seven in absentia, members.											IPR012322	Conserved_site	Conotoxin, delta-type, conserved site				0	A0A024R6I1	PF00250		A0A024RBG1	CL0261		A0A024R1D8	IPR008271
A0A343H1Z8	A0A343H1Z8_HUMAN	ATP6	2	A0A023I7H5		A0A024R847	C7orf20	Chromosome 7 open reading frame 20, isoform CRA_a	1		PF00375	Family	SDF	Sodium:dicarboxylate symporter family			CL0390	zf-FYVE-PHD	Superfamily contains a number of zinc-fingers, of the FYVE/PHD type, which are found in several groups of proteins including myelin-associated oligodendrocytic basic proteins (MOBP) Rabphilins, melanophilins, exophilins and myosin-VIIA and Rab-interacting protein families.											IPR012323	Conserved_site	Cyclotide, bracelet, conserved site				0	A0A024R6K8	PF00458		A0A024RBH0	CL0016		A0A024R1D8	IPR011009
A0A343H3Q9	A0A343H3Q9_HUMAN	ATP6	2	A0A023I7H5		A0A024R849	GPR30	G protein-coupled receptor 30, isoform CRA_a	4		PF00376	Family	MerR	MerR family regulatory protein	CL0123		CL0391	CAP_C-like	Families in this clan adopt a beta super helix structure [1-2]. The clan includes the C terminal domain of adenylate cyclase which binds binds actin [1].	[1]. Crystal structure of the actin binding domain of the cyclase-associated protein. Dodatko T, Fedorov AA, Grynberg M, Patskovsky Y, Rozwarski DA, Jaroszewski L, Aronoff-Spencer E, Kondraskina E, Irving T, Godzik A, Almo SC Biochemistry. 43, 10628-10641, (2004). PMID: 15311924	[2]. Crystal structure of the human retinitis pigmentosa 2 protein and its interaction with Arl3. Kuhnel K, Veltel S, Schlichting I, Wittinghofer A Structure. 14, 367-378, (2006). PMID: 16472755									IPR012324	Conserved_site	Cyclotide, moebius, conserved site				0	A0A024R6K8	PF00579		A0A024RBI3	CL0233		A0A024R1D8	IPR011993
A0A343H566	A0A343H566_HUMAN	ATP6	2	A0A023I7H5		A0A024R872	C9orf88	Chromosome 9 open reading frame 88, isoform CRA_a	2		PF00377	Domain	Prion	Prion/Doppel alpha-helical domain			CL0392	Chaperone-J	The J-domain is found in a number of stress-response proteins. It is found at the N-terminal of Hsc20, DnaJ-chaperone in E. coli, and viral large T-antigen proteins; it is also in Hsc40, mammalian auxilin and in both animal and plant DnaJ proteins. It is also found in degenerate form in Pam16 proteins.											IPR012640	Conserved_site	Membrane lipoprotein, lipid attachment site				0	A0A024R6M2	PF04802		A0A024RBM1	CL0011		A0A024R1D8	IPR016137
A0A343H5I3	A0A343H5I3_HUMAN	ATP6	2	A0A023I7H5		A0A024R873	C9orf117	Cilia- and flagella-associated protein 157	2		PF00378	Domain	ECH_1	Enoyl-CoA hydratase/isomerase	CL0127		CL0393	FucI-AraA_C	The enzymes in this superfamily function as a hexamer, which is the largest structurally known ketol isomerase, that has no sequence or structural similarity to other ketol isomerases.											IPR013000	Conserved_site	Ribosomal protein L4/L1e, eukaryotic/archaeal, conserved site				0	A0A024R6N3	PF08039		A0A024RBP7	CL0130		A0A024R1D8	IPR017441
A0A343H7N7	A0A343H7N7_HUMAN	ATP6	2	A0A023I7H5		A0A024R878	ENG	Endoglin (Osler-Rendu-Weber syndrome 1), isoform CRA_a	5		PF00379	Family	Chitin_bind_4	Insect cuticle protein			CL0394	DsrEFH-like	This is a superfamily of small proteins from phototrophic sulfur bacteria that are involved in oxidisation of intracellular sulfur.											IPR013006	Conserved_site	Antimicrobial peptide, C6 type, conserved site				0	A0A024R6P6	PF05303		A0A024RBR1	CL0010		A0A024R1D8	IPR036305
A0A343H8W6	A0A343H8W6_HUMAN	ATP6	2	A0A023I7H5		A0A024R887	C9orf90	Chromosome 9 open reading frame 90, isoform CRA_a	2		PF00380	Family	Ribosomal_S9	Ribosomal protein S9/S16	CL0329		CL0395	Tubby_C	This superfamily contains the scramblase protein family, the Tub family and the DUF567, a family of plant and bacterial proteins of hitherto unknown function. All members are membrane-tethered transcription factors.	[1]. Phospholipid scramblases and Tubby-like proteins belong to a new superfamily of membrane tethered transcription factors. Bateman A, Finn RD, Sims PJ, Wiedmer T, Biegert A, Soding J Bioinformatics. 25, 159-162, (2009). PMID: 19010806										IPR013032	Conserved_site	EGF-like, conserved site				0	A0A024R6Q2	PF08704		A0A024RBR1	CL0511		A0A024R1D8	IPR044926
A0A343HCH7	A0A343HCH7_HUMAN	ATP6	2	A0A023I7H5		A0A024R894	GPR144	G protein-coupled receptor 144, isoform CRA_c	1		PF00381	Domain	PTS-HPr	PTS HPr component phosphorylation site			CL0396	Marvel-like	The MAL and related proteins for vesicle trafficking and membrane link (MARVEL) domain is a module with a four transmembrane-helix architecture that has been identified in proteins of the myelin and lymphocyte (MAL), physins, gyrins and occludin families.											IPR013055	Conserved_site	Tachykinin/Neurokinin-like, conserved site				0	A0A024R6Q4	PF15555		A0A024RBT0	CL0186		A0A024R1E4	IPR019560
A0A343HD22	A0A343HD22_HUMAN	ATP6	2	A0A023I7H5		A0A024R899	MNAB	RING-type E3 ubiquitin transferase, 2.3.2.27	4		PF00382	Domain	TFIIB	Transcription factor TFIIB repeat	CL0065		CL0397	TusA-like	Member families include sulfurtransferase TusA.											IPR013061	Conserved_site	Tryptophan/tryrosine permease, conserved site				0	A0A024R6R3	PF05460		A0A024RBU2	CL0221		A0A024R1H0	IPR036188
A0A343HIA5	A0A343HIA5_HUMAN	ATP6	2	A0A023I7H5		A0A024R8B0	ZYG11BL	Zyg-11 homolog B (C. elegans)-like, isoform CRA_b	1		PF00383	Domain	dCMP_cyt_deam_1	Cytidine and deoxycytidylate deaminase zinc-binding region	CL0109		CL0398	RMMBL_DRMBL	This clan contains the fifth motif found in RNA and DNA metabolising metallo-beta-lactamases. The fifth motif appears to be specific to function [1].	[1]. Metallo-beta-lactamase fold within nucleic acids processing enzymes: the beta-CASP family. Callebaut I, Moshous D, Mornon JP, de Villartay JP Nucleic Acids Res 30, 3592-3601, (2002). PMID: 12177301										IPR013139	Conserved_site	Omega-atracotoxin, conserved site-2				0	A0A024R6S6	PF00179		A0A024RC03	CL0192		A0A024R1H1	IPR014912
A0A343HN19	A0A343HN19_HUMAN	ATP6	2	A0A023I7H5		A0A024R8B2	FREQ	Frequenin homolog (Drosophila), isoform CRA_a	2		PF00384	Family	Molybdopterin	Molybdopterin oxidoreductase			CL0399	Asp-glut_race	Superfamily contains aspartate racemase, glutamate racemase, hydantoin racemase and arylmalonate decarboxylase families from fungi, plants, bacteria and archaeal species.											IPR013140	Conserved_site	Huwentoxin, conserved site-1				0	A0A024R6T8	PF10187		A0A024RC03	CL0661		A0A024R1H1	IPR036249
A0A343HXH2	A0A343HXH2_HUMAN	ATP6	2	A0A023I7H5		A0A024R8B3	FAM73B	Family with sequence similarity 73, member B, isoform CRA_e	1		PF00385	Domain	Chromo	Chromo (CHRromatin Organisation MOdifier) domain	CL0049		CL0400	GG-leader	This is a collection of short bacterial families that carry a distinctive GG-cleavage motif. Conservation C-terminal to the GG-motif is not apparent. However, the families are all interconnected with critical virulence attributes of one kind or another.											IPR013141	Conserved_site	Conotoxin-I, conserved site				0	A0A024R6V6	PF09749		A0A024RC37	CL0020		A0A024R1H1	IPR038219
A0A343I8T1	A0A343I8T1_HUMAN	ATP6	2	A0A023I7H5		A0A024R8B7	CRSP8	Mediator of RNA polymerase II transcription subunit 27, Cofactor required for Sp1 transcriptional activation subunit 8, Mediator complex subunit 27	3		PF00386	Domain	C1q	C1q domain	CL0100		CL0401	AsmA-like	Families in this collection are AsmA-like. Mutations in the AsmA gene restore the assembly of OmpF, a trimeric outer membrane porin from E coli and related bacteria necessary for the cytotoxic action of group-A colicins.											IPR013152	Conserved_site	Gastrin/cholecystokinin, conserved site				0	A0A024R6W4	PF03676		A0A024RC42	CL0159		A0A024R1H1	IPR039992
A0A343IC64	A0A343IC64_HUMAN	ATP6	2	A0A023I7H5		A0A024R8B8	C9orf28	Chromosome 9 open reading frame 28, isoform CRA_a	2		PF00387	Family	PI-PLC-Y	Phosphatidylinositol-specific phospholipase C, Y domain	CL0384		CL0402	Cdc48_2-like	Superfamily contains C-terminal domains of N-ethylmaleimide sensitive fusion proteins, VCP-like ATPases, membrane fusion ATPase p97 domain 2, peroxisome biogenesis factor 1 (PEX-1), domain 2, and ubiquitin fusion degradation protein UFD1 families.											IPR013373	Conserved_site	Flagellin/pilin, N-terminal site, archaea				0	A0A024R6W8	PF00560		A0A024RC51	CL0148		A0A024R1J8	IPR000299
A0A343ID00	A0A343ID00_HUMAN	ATP6	2	A0A023I7H5		A0A024R8C5	SURF5	Mediator of RNA polymerase II transcription subunit 22, Mediator complex subunit 22, Surfeit locus protein 5	2		PF00388	Family	PI-PLC-X	Phosphatidylinositol-specific phospholipase C, X domain	CL0384		CL0403	ADC-like	Superfamily contains the acetoacetate decarboxylase enzyme family EC:4.1.1.4, and a family of uncharacterized proteins from bacteria.											IPR013383	Conserved_site	CRISPR-associated protein DxTHG, conserved site				0	A0A024R6W8	PF13516		A0A024RC78	CL0299		A0A024R1J8	IPR000798
A0A343IDY8	A0A343IDY8_HUMAN	ATP6	2	A0A023I7H5		A0A024R8C7	C9orf74	Ubiquitin-related modifier 1	3		PF00389	Domain	2-Hacid_dh	D-isomer specific 2-hydroxyacid dehydrogenase, catalytic domain	CL0325		CL0404	BPD_transp_1	This clan contains families that are involved in transport of molecules across membranes. It includes the bacterial binding protein-dependent transport system inner membrane component, Pfam:PF00528, which is ATP dependent system involved in transport of a range of substrates [1-2].	[1]. Binding protein-dependent transport systems. Higgins CF, Hyde SC, Mimmack MM, Gileadi U, Gill DR, Gallagher MP J Bioenerg Biomembr 22, 571-592, (1990). PMID: 2229036	[2]. Bacterial periplasmic transport systems: structure, mechanism, and evolution. Ames GF Annu Rev Biochem. 55, 397-425, (1986). PMID: 3527048									IPR013734	Conserved_site	Transcription factor Nrm1/Whi5				0	A0A024R6Z7	PF00035		A0A024RC82	CL0219		A0A024R1J8	IPR008954
A0A343II96	A0A343II96_HUMAN	ATP6	2	A0A023I7H5		A0A024R8E4	C9orf32	Chromosome 9 open reading frame 32, isoform CRA_a	2		PF00390	Domain	malic	Malic enzyme, N-terminal domain	CL0603		CL0405	DNA_b-psBarrel	Superfamily consists of type II restriction endonuclease effector (N-term) domain and plant B3 DNA binding domain families.											IPR013793	Conserved_site	Porin, Gram-negative type, conserved site				0	A0A024R6Z7	PF01207		A0A024RC91	CL0123		A0A024R1J8	IPR011174
A0A343JJ75	A0A343JJ75_HUMAN	ATP6	2	A0A023I7H5		A0A024R8E9	KIAA0649	KIAA0649, isoform CRA_a	1		PF00391	Domain	PEP-utilizers	PEP-utilising enzyme, mobile domain	CL0364		CL0406	YjbJ-CsbD-like	CsbD is a bacterial general stress response protein. It's expression is mediated by sigma-B, an alternative sigma factor [1]. The role of CsbD in stress response is unclear. YjbJ is a hypothetical protein with a similar structure.	[1]. Regulatory interactions between the Pho and sigma(B)-dependent general stress regulons of Bacillus subtilis. Pragai Z, Harwood CR Microbiology 148, 1593-1602, (2002). PMID: 11988534										IPR013852	Conserved_site	Translation elongation factor P/YeiP, conserved site				0	A0A024R702	PF05517		A0A024RCA1	CL0229		A0A024R1J8	IPR011259
A0A343JMI5	A0A343JMI5_HUMAN	ATP6	2	A0A023I7H5		A0A024R8F2	C9orf9	Chromosome 9 open reading frame 9, isoform CRA_a	1		PF00392	Domain	GntR	Bacterial regulatory proteins, gntR family	CL0123		CL0407	TBP-like	TBP is a transcription factor whose DNA binding fold is composed of a curved antiparallel beta-sheet [1]. This fold is also found in the N terminal region of DNA repair glycosylases. The N terminal domain of DNA glycosylase has only a single copy of the fold, whereas TBP contains a duplication of this fold [2-3].	[1]. Crystal structure of TFIID TATA-box binding protein. Nikolov DB, Hu SH, Lin J, Gasch A, Hoffmann A, Horikoshi M, Chua NH, Roeder RG, Burley SK Nature 360, 40-46, (1992). PMID: 1436073	[2]. DNA glycosylase recognition and catalysis. Fromme JC, Banerjee A, Verdine GL Curr Opin Struct Biol. 14, 43-49, (2004). PMID: 15102448	[3]. Crystallizing thoughts about DNA base excision repair. Hollis T, Lau A, Ellenberger T Prog Nucleic Acid Res Mol Biol. 68, 305-314, (2001). PMID: 11554308								IPR014029	Conserved_site	NADH:ubiquinone oxidoreductase, 49kDa subunit, conserved site				0	A0A024R718	PF04095		A0A024RCA1	CL0390		A0A024R1J8	IPR011993
A0A343JMJ8	A0A343JMJ8_HUMAN	ATP6	2	A0A023I7H5		A0A024R8I0	BTBD14A	BTB (POZ) domain containing 14A, isoform CRA_a	2		PF00393	Domain	6PGD	6-phosphogluconate dehydrogenase, C-terminal domain	CL0106		CL0408	PUP	superfamily contains a number of purine nucleoside phosphorylase, uridine nucleoside phosphorylase, and various nucleosidase families of proteins.											IPR014034	Conserved_site	Ferritin, conserved site				0	A0A024R718	PF18127		A0A024RCC6	CL0412		A0A024R1J8	IPR014352
A0A343JRN2	A0A343JRN2_HUMAN	ATP6	2	A0A023I7H5		A0A024R8I2	UBADC1	Ubiquitin-associated domain-containing protein 1, E3 ubiquitin-protein ligase subunit KPC2, Kip1 ubiquitination-promoting complex protein 2	2		PF00394	Domain	Cu-oxidase	Multicopper oxidase	CL0026		CL0409	GAP	Superfamily contains BCR-homology GTPase activation domain (BH-domain) and p120GAP domain-like, including the GAP related domain of neurofibromin, families.											IPR014762	Conserved_site	DNA mismatch repair, conserved site				0	A0A024R737	PF12706		A0A024RCF5	CL0063		A0A024R1J8	IPR018979
A0A343JRX3	A0A343JRX3_HUMAN	ATP6	2	A0A023I7H5		A0A024R8I5	FAM69B	Family with sequence similarity 69, member B, isoform CRA_a	1		PF00395	Repeat	SLH	S-layer homology domain			CL0410	LEF-8-like	Late expression factor 8 (LEF-8) is one of the primary components of RNA polymerase produced by polyhedrosis viruses. LEF-8 shows homology to domain 6 of the second largest subunit of prokaryotic DNA-directed RNA polymerase[1].	[1]. Characterization of late gene expression factors lef-9 and lef-8 from Bombyx mori nucleopolyhedrovirus. Acharya A, Gopinathan KP J Gen Virol 83, 2015-2023, (2002). PMID: 12124466										IPR014783	Conserved_site	Copper type II, ascorbate-dependent monooxygenase, histidine-cluster-2 conserved site				0	A0A024R746	PF01734		A0A024RCG3	CL0039		A0A024R1J8	IPR018980
A0A343JS12	A0A343JS12_HUMAN	ATP6	2	A0A023I7H5		A0A024R8I7	AGPAT2	1-acyl-sn-glycerol-3-phosphate acyltransferase, 2.3.1.51	5		PF00396	Family	Granulin	Granulin			CL0411	Vir	Several families of paralogous proteins are included in this superfamily, largely from Plasmodium species. The genome expresses great numbers of them, and they vary subtly from each other.											IPR015869	Conserved_site	Transcription antitermination protein, NusG, bacteria, conserved site				0	A0A024R751	PF00400		A0A024RCJ2	CL0012		A0A024R1J8	IPR019747
A0A343JSI1	A0A343JSI1_HUMAN	ATP6	2	A0A023I7H5		A0A024R8I8	C9orf140	Chromosome 9 open reading frame 140, isoform CRA_a	1		PF00397	Domain	WW	WW domain	CL0680		CL0412	Frag1-like	This clan contains the Frag1/DRA											IPR015875	Conserved_site	IMP dehydrogenase / GMP reductase, conserved site				0	A0A024R771	PF00240		A0A024RCJ9	CL0012		A0A024R1J8	IPR019748
A0A343JT78	A0A343JT78_HUMAN	ATP6	2	A0A023I7H5		A0A024R8M6	ET	Major facilitator superfamily domain containing 11	1		PF00398	Domain	RrnaAD	Ribosomal RNA adenine dimethylase	CL0063		CL0413	Toprim-like	This is families that have a conserved region from DNA primase. This corresponds to the Toprim domain common to DnaG primases, topoisomerases, OLD family nucleases and RecR proteins [1].	[1]. Identification of the RecR Toprim domain as the binding site for both RecF and RecO. A role of RecR in RecFOR assembly at double-stranded DNA-single-stranded DNA junctions. Honda M, Inoue J, Yoshimasu M, Ito Y, Shibata T, Mikawa T J Biol Chem. 281, 18549-18559, (2006). PMID: 16675461										IPR015884	Conserved_site	Malic enzyme, conserved site				0	A0A024R7A6	PF01403		A0A024RCK7	CL0148		A0A024R1J8	IPR019749
A0A343JT91	A0A343JT91_HUMAN	ATP6	2	A0A023I7H5		A0A024R8Q2	FLJ35220	Endonuclease V	1		PF00399	Repeat	PIR	Yeast PIR protein repeat			CL0414	TerB	A number of families which show resistance to antibiotics or tellurite are included here.											IPR015892	Conserved_site	Carbonic anhydrase, prokaryotic-like, conserved site				0	A0A024R7A6	PF01437		A0A024RCK7	CL0361		A0A024R1J8	IPR029071
A0A343JU92	A0A343JU92_HUMAN	ATP6	2	A0A023I7H5		A0A024R8Q8	C17orf56	Chromosome 17 open reading frame 56, isoform CRA_d	1		PF00400	Repeat	WD40	WD domain, G-beta repeat	CL0186		CL0416	Anoctamin-like	The families are transmembrane families, where some of the members have sodium tolerance activity.											IPR015910	Conserved_site	Inosine/uridine-preferring nucleoside hydrolase, conserved site				0	A0A024R7A6	PF01833		A0A024RCK9	CL0148		A0A024R1J8	IPR035963
A0A343JYA9	A0A343JYA9_HUMAN	ATP6	2	A0A023I7H5		A0A024R8S6	KIAA0195	KIAA0195, isoform CRA_a	1		PF00401	Domain	ATP-synt_DE	ATP synthase, Delta/Epsilon chain, long alpha-helix domain			CL0417	BIR-like	Clan of domains all involved in binding nucleic acid and sharing the sequence motif C3HC.											IPR015911	Conserved_site	Phosphoglycerate kinase, conserved site				0	A0A024R7A6	PF08337		A0A024RCK9	CL0361		A0A024R1J8	IPR041789
A0A343JYC2	A0A343JYC2_HUMAN	ATP6	2	A0A023I7H5		A0A024R8T2	C17orf55	Chromosome 17 open reading frame 55, isoform CRA_a	1		PF00402	Repeat	Calponin	Calponin family repeat			CL0418	GIY-YIG	Based on the analysis of genomic distribution, patterns of domain fusions and phylogenetic considerations for individual families, an evolutionary scenario is proposed that explains the emergence and development of the major branches of the GIY-YIG superfamily that links the Slx-type with the UvrC-like endonucleases. Most families appear to target DNA. The GIY-YIG domain has been quite successful…	[1]. Phylogenomic analysis of the GIY-YIG nuclease superfamily. Dunin-Horkawicz S, Feder M, Bujnicki JM (). PMID: 16646971										IPR015912	Conserved_site	Phosphofructokinase, conserved site				0	A0A024R7A6	PF17960		A0A024RCL4	CL0148		A0A024R1J8	IPR046810
A0A343KIN0	A0A343KIN0_HUMAN	ATP6	2	A0A023I7H5		A0A024R8U5	SFRS2	Splicing factor, arginine/serine-rich 2, isoform CRA_a	2		PF00403	Domain	HMA	Heavy-metal-associated domain	CL0704		CL0419	T3SS-Chaperone	Type III secretion systems of the two forms, a - translocation-associated, and b - bacterial flagellum, share homology between comparable parts. This superfamily includes the chaperone proteins FliJ and HrpB7.	[1]. Type III secretion: what's in a name?. Desvaux M, Hebraud M, Henderson IR, Pallen MJ Trends Microbiol. 14, 157-160, (2006). PMID: 16533600										IPR015967	Conserved_site	Recombination protein RecR, conserved site				0	A0A024R7A6	PF18020		A0A024RCL4	CL0361		A0A024R1L3	IPR024810
A0A343KKD9	A0A343KKD9_HUMAN	ATP6	2	A0A023I7H5		A0A024R8W0	DDX48	RNA helicase, 3.6.4.13	4		PF00404	Domain	Dockerin_1	Dockerin type I domain	CL0220		CL0420	GlpM-like	This is a group of membrane proteins of the GlpM type.											IPR015994	Conserved_site	Phosphoenolpyruvate carboxykinase (ATP), conserved site				0	A0A024R7A6	PF20170		A0A024RCL8	CL0012		A0A024R1L3	IPR045909
A0A343KKH2	A0A343KKH2_HUMAN	ATP6	2	A0A023I7H5		A0A024R8W1	C17orf70	Chromosome 17 open reading frame 70, isoform CRA_a	1		PF00405	Domain	Transferrin	Transferrin	CL0177		CL0421	LppaM	Superfamily consists of those protein families wherein the lipo-protein attachmnet motif, usually at the N-terminus, is found. regions of sequence downstream of this motif may not be conserved between families in the clan.											IPR016050	Conserved_site	Proteasome beta-type subunit, conserved site				0	A0A024R7B2	PF00001		A0A024RCN6	CL0039		A0A024R1L3	IPR046906
A0A343KLK5	A0A343KLK5_HUMAN	ATP6	2	A0A023I7H5		A0A024R8W2	C17orf27	Chromosome 17 open reading frame 27, isoform CRA_a	1		PF00406	Domain	ADK	Adenylate kinase	CL0023		CL0422	Fibrinogen_C	This is a collection of families with C-terminal domains that are of similar structure.											IPR016059	Conserved_site	DNA ligase, ATP-dependent, conserved site				0	A0A024R7C4	PF05178		A0A024RCN6	CL0258		A0A024R1L5	IPR005178
A0A343KLQ8	A0A343KLQ8_HUMAN	ATP6	2	A0A023I7H5		A0A024R8W9	C17orf62	Essential for reactive oxygen species protein	2		PF00407	Domain	Bet_v_1	Pathogenesis-related protein Bet v 1 family	CL0209		CL0423	AhpD-like	Superfamily contains CMD-like, and Antioxidant defense protein AhpD families.											IPR016066	Conserved_site	Alpha-D-phosphohexomutase, conserved site				0	A0A024R7C4	PF12936		A0A024RCN6	CL0497		A0A024R1M3	IPR000001
A0A343KMI0	A0A343KMI0_HUMAN	ATP6	2	A0A023I7H5		A0A024R8X4	FLJ22222	Fe2OG dioxygenase domain-containing protein	1		PF00408	Repeat	PGM_PMM_IV	Phosphoglucomutase/phosphomannomutase, C-terminal domain			CL0424	T3SS-hook	There is homology between the proteins forming the flagellar system and those involved in translocation of effector proteins at host-infection. Both systems, in Gram-negative bacteria, are Sec-independent but ATPase-dependent. There are up to 9 proteins that are homologous between the two systems. It is not clear, however, why HpaP proteins, which are essentially suppressants of HrpB2, an essenti…	[1]. Type III secretion: what's in a name?. Desvaux M, Hebraud M, Henderson IR, Pallen MJ Trends Microbiol. 14, 157-160, (2006). PMID: 16533600										IPR016157	Conserved_site	Cullin, conserved site				0	A0A024R7D3	PF13664		A0A024RCU2	CL0449		A0A024R1M3	IPR013806
A0A343KVL6	A0A343KVL6_HUMAN	ATP6	2	A0A023I7H5		A0A024R8Y0	CDCA1	Cell division cycle associated 1, isoform CRA_a	1		PF00410	Domain	Ribosomal_S8	Ribosomal protein S8			CL0425	ComplexI-N	This superfamily contains proteins from the families Oxidored_q1 and NADHdeh_related. The Oxidored_q1 family is part of complex I which catalyses the transfer of two electrons from NADH to ubiquinone in a reaction that is associated with proton translocation across the membrane. Many members of the NADHdeh_related family are archaeal and bacterial, indicating the evolutionary origins of ComplexI.											IPR016160	Conserved_site	Aldehyde dehydrogenase, cysteine active site				0	A0A024R7E0	PF00651		A0A024RCU2	CL0465		A0A024R1M3	IPR018056
A0A343KWP3	A0A343KWP3_HUMAN	ATP6	2	A0A023I7H5		A0A024R8Y7	C1orf156	Chromosome 1 open reading frame 156, isoform CRA_a	1		PF00411	Family	Ribosomal_S11	Ribosomal protein S11	CL0267		CL0426	HRDC-like	Superfamily includes HRDC domain from helicases, RNA polymerase II subunit RBP4, RNase D C-terminal domains, and EXOSC10 HRDC domain-like families.											IPR017703	Conserved_site	YgfZ/GcvT conserved site				0	A0A024R7E0	PF10523		A0A024RCV8	CL0023		A0A024R1M3	IPR038178
A0A343KWU5	A0A343KWU5_HUMAN	ATP6	2	A0A023I7H5		A0A024R8Z5	BRP44	Mitochondrial pyruvate carrier	2		PF00412	Domain	LIM	LIM domain	CL0167		CL0428	TolA-TonB-Cterm	This clan contains the TolA and TonB C terminal domains. These domains adopt a structure containing anti-parallel beta sheets with some alpha helical regions. The TolA family contains an extra N-terminal helix over the common fold, and the TonB is an isolated domain that can form different segment-swapped dimers depending on the fragment length [1].	[1]. The solution structure of the C-terminal domain of TonB and interaction studies with TonB box peptides. Sean Peacock R, Weljie AM, Peter Howard S, Price FD, Vogel HJ J Mol Biol. 345, 1185-1197, (2005). PMID: 15644214										IPR017756	Conserved_site	Transmembrane Gly-Cys-Arg, conserved site				0	A0A024R7E2	PF01569		A0A024RCW2	CL0159		A0A024R1M5	IPR000210
A0A343L0U9	A0A343L0U9_HUMAN	ATP6	2	A0A023I7H5		A0A024R8Z8	C1orf155	Centromere protein L	1		PF00413	Domain	Peptidase_M10	Matrixin	CL0126		CL0429	UcrQ-like	The families here include those that are the H and S chains of cytochrome c subunit B1.											IPR017860	Conserved_site	Peptidase M22, conserved site				0	A0A024R7F3	PF12697		A0A024RCW2	CL0214		A0A024R1M5	IPR000637
A0A343L5C2	A0A343L5C2_HUMAN	ATP6	2	A0A023I7H5		A0A024R903	LZTR2	Protein transport protein sec16	2		PF00414	Repeat	MAP1B_neuraxin	Neuraxin and MAP1B repeat			CL0430	CopD_like	This clan contains families that are related to the CopD family of proteins. CopD, together with CopC, performs copper uptake into the cytoplasm.	[1]. Molecular mechanisms of copper resistance and accumulation in bacteria. Cooksey DA FEMS Microbiol Rev 14, 381-386, (1994). PMID: 7917425										IPR017864	Conserved_site	Arrestin, conserved site				0	A0A024R7H0	PF00270		A0A024RCW8	CL0236		A0A024R1M5	IPR011333
A0A343LF01	A0A343LF01_HUMAN	ATP6	2	A0A023I7H5		A0A024R923	SCYL1BP1	RAB6-interacting golgin, N-terminal kinase-like-binding protein 1, SCY1-like 1-binding protein 1	2		PF00415	Repeat	RCC1	Regulator of chromosome condensation (RCC1) repeat	CL0186		CL0431	PF	The families here all show the Profilin-like fold, and represent both the Profilin (actin-binding protein) (55770) and the Roadblock/LC7 domain-type (103196) superfamilies.											IPR017865	Conserved_site	F-actin capping protein, alpha subunit, conserved site				0	A0A024R7J0	PF00069		A0A024RCY9	CL0223		A0A024R1M5	IPR013087
A0A343LHK6	A0A343LHK6_HUMAN	ATP6	2	A0A023I7H5		A0A024R929	C1orf9	Chromosome 1 open reading frame 9, isoform CRA_d	1		PF00416	Family	Ribosomal_S13	Ribosomal protein S13/S18	CL0303		CL0433	SPFH	This superfamily includes the SPFH family as well as the shoulder domain from the Major Vault Protein [1].	[1]. The structure of rat liver vault at 3.5 angstrom resolution. Tanaka H, Kato K, Yamashita E, Sumizawa T, Zhou Y, Yao M, Iwasaki K, Yoshimura M, Tsukihara T Science. 323, 384-388, (2009). PMID: 19150846										IPR017866	Conserved_site	Succinyl-CoA synthetase, beta subunit, conserved site				0	A0A024R7K0	PF01585		A0A024RCZ7	CL0167		A0A024R1M5	IPR036236
A0A343LMS6	A0A343LMS6_HUMAN	ATP6	2	A0A023I7H5		A0A024R937	TNLG2B	Tumor necrosis factor (Ligand) superfamily, member 4 (Tax-transcriptionally activated glycoprotein 1, 34kDa), isoform CRA_a, Tumor necrosis factor ligand 2B	2		PF00418	Family	Tubulin-binding	Tau and MAP protein, tubulin-binding repeat			CL0434	Sialidase	This superfamily includes sialidases enzymes. Several viruses use sialic acid as a cell surface receptor for host invasion. These viruses then have cell surface neuraminidase enzymes to cleave sialic acid from cell surface proteins allowing them to leave the host cell after replication. This superfamily are composed of six beta-sheets that form a six-fold beta-propeller structure. Many members of…	[1]. Sialidases: structures, biological significance and therapeutic potential. Taylor G Curr Opin Struct Biol. 6, 830-837, (1996). PMID: 8994884										IPR017870	Conserved_site	FeS cluster insertion, C-terminal, conserved site				0	A0A024R7K0	PF01805		A0A024RD01	CL0012		A0A024R1M6	IPR019186
A0A343LPX8	A0A343LPX8_HUMAN	ATP6	2	A0A023I7H5		A0A024R968	ATP2B4	Calcium-transporting ATPase, 7.2.2.10	5		PF00419	Domain	Fimbrial	Fimbrial protein	CL0204		CL0435	NPR	The several protein families of nitrogen permease regulators, that complex together and regulator TORC1 in response to amino acid starvation are likely to have arisen by a gene duplication event.	[1]. A genome-wide screen for regulators of TORC1 in response to amino acid starvation reveals a conserved Npr2/3 complex. Neklesa TK, Davis RW (). PMID: 19521502										IPR017871	Conserved_site	ABC transporter-like, conserved site				0	A0A024R7K2	PF00153		A0A024RD15	CL0016		A0A024R1P7	IPR012919
A0A343LPZ1	A0A343LPZ1_HUMAN	ATP6	2	A0A023I7H5		A0A024R973	C1orf27	Protein odr-4 homolog	1		PF00420	Family	Oxidored_q2	NADH-ubiquinone/plastoquinone oxidoreductase chain 4L			CL0436	FliG	This superfamily is characterised by a fragmented superhelix consisting of 3-4 helical motifs and connecting helices. Memebers include the direct flagellar motor as well as the MG2+ families.											IPR017872	Conserved_site	Pyrimidine-nucleoside phosphorylase, conserved site				0	A0A024R7K6	PF04117		A0A024RD20	CL0023		A0A024R1P7	IPR040994
A0A343M3S8	A0A343M3S8_HUMAN	ATP6	2	A0A023I7H5		A0A024R983	TROVE2	TROVE domain family, member 2, isoform CRA_b	2		PF00421	Family	PSII	Photosystem II protein			CL0437	EF-G_C	This superfamily is characterised by being an alpha-beta 2-Layer Sandwich. It is found in EF2 proteins from both prokaryotes and eukaryotes, as well as in some tetracycline resistance proteins, peptide chain release factors ], and in the C-terminal region of the bacterial hypothetical protein, YigZ.											IPR017889	Conserved_site	Avidin-like, conserved site				0	A0A024R7L4	PF12280		A0A024RD26	CL0011		A0A024R1P7	IPR045119
A0A343R0H4	A0A343R0H4_HUMAN	ATP6	2	A0A023I7H5		A0A024R993	LRRN5	Leucine rich repeat neuronal 5, isoform CRA_a	1		PF00423	Repeat	HN	Haemagglutinin-neuraminidase	CL0434		CL0439	NusG-like	Members of this clan are related to the NusG transcription termination factor. The eukaryotic orthologue of NusG is Spt5 [1].	[1]. Novel domains and orthologues of eukaryotic transcription elongation factors. Ponting CP Nucleic Acids Res. 30, 3643-3652, (2002). PMID: 12202748										IPR017891	Conserved_site	Insulin-like growth factor binding protein, N-terminal, Cys-rich conserved site				0	A0A024R7L6	PF10240		A0A024RD26	CL0192		A0A024R1Q3	IPR020987
A0A343R0P1	A0A343R0P1_HUMAN	ATP6	2	A0A023I7H5		A0A024R996	PCTK3	PCTAIRE protein kinase 3, isoform CRA_b	2		PF00424	Family	REV	REV protein (anti-repression trans-activator protein)			CL0441	AlbA	This is a family of DNA and RNA binding proteins found from archaea to humans.											IPR017900	Conserved_site	4Fe-4S ferredoxin, iron-sulphur binding, conserved site				0	A0A024R7M2	PF10241		A0A024RD26	CL0661		A0A024R1Q3	IPR027417
A0A343RK41	A0A343RK41_HUMAN	ATP6	2	A0A023I7H5		A0A024R9B1	C8orf38	Chromosome 8 open reading frame 38, isoform CRA_c	1		PF00425	Family	Chorismate_bind	chorismate binding enzyme			CL0442	Tubulin_C	This superfamily is characterised by being at the C-terminus of the GTPase-binding region of tubulins.	[1]. Tubulin and FtsZ form a distinct family of GTPases. Nogales E, Downing KH, Amos LA, Lowe J Nat Struct Biol 5, 451-458, (1998). PMID: 9628483	[2]. Tubulin and its prokaryotic homologue FtsZ: a structural and functional comparison. Dyer N Sci Prog. 92, 113-137, (2009). PMID: 19697711	[3]. An anthropoid-specific segmental duplication on human chromosome 1q22. Kuryshev VY, Vorobyov E, Zink D, Schmitz J, Rozhdestvensky TS, Munstermann E, Ernst U, Wellenreuther R, Moosmayer P, Bechtel S, Schupp I, Horst J, Korn B, Poustka A, Wiemann S Genomics. 88, 143-151, (2006). PMID: 16545939								IPR017907	Conserved_site	Zinc finger, RING-type, conserved site				0	A0A024R7M3	PF00008		A0A024RD33	CL0079		A0A024R1R8	IPR015157
A0A343RMU8	A0A343RMU8_HUMAN	ATP6	2	A0A023I7H5		A0A024R9B8	PGCP	Carboxypeptidase Q, Plasma glutamate carboxypeptidase	3		PF00426	Domain	VP4_haemagglut	Outer Capsid protein VP4 (Hemagglutinin) Concanavalin-like domain	CL0004		CL0445	SNARE-fusion	The SNARE-fusion complex families are characterised by being tetrameric coiled-coil structures.											IPR017915	Conserved_site	Colipase, conserved site				0	A0A024R7M3	PF00059		A0A024RD55	CL0001		A0A024R1T2	IPR002957
A0A343RVZ9	A0A343RVZ9_HUMAN	ATP6	2	A0A023I7H5		A0A024R9C0	PPM2C	Protein phosphatase 2C, magnesium-dependent, catalytic subunit, isoform CRA_a	1		PF00427	Family	PBS_linker_poly	Phycobilisome Linker polypeptide			CL0446	Bacteriocin_TLN	A number of different bacterial species produce bacteriocins to kill competitor species, and the colicin class is a group of complex three-domain structures. The receptor-binding domain recognises and binds to specific cell surface receptors on the target cells; the N-terminal translocation domain interacts with cell membrane proteins to gain access to the cell interior; the C-terminal domain spe…	[1]. Crystal structure of colicin E3: implications for cell entry and ribosome inactivation. Soelaiman S, Jakes K, Wu N, Li C, Shoham M Mol Cell. 8, 1053-1062, (2001). PMID: 11741540	[2]. Phage associated bacteriocins reveal a novel mechanism for bacteriocin diversification in Klebsiella. Chavan M, Rafi H, Wertz J, Goldstone C, Riley MA J Mol Evol. 60, 546-556, (2005). PMID: 15883889									IPR017918	Conserved_site	Nitrogen regulatory protein PII, conserved site				0	A0A024R7M3	PF00084		A0A024RD59	CL0016		A0A024R1T2	IPR018039
A0A343RY28	A0A343RY28_HUMAN	ATP6	2	A0A023I7H5		A0A024R9D5	C8orf1	Chromosome 8 open reading frame 1, isoform CRA_a	1		PF00428	Family	Ribosomal_60s	60s Acidic ribosomal protein			CL0447	Hypoth_1	This superfamily includes two related families of short uncharacterised proteins from bacteria.											IPR017925	Conserved_site	Dihydrofolate reductase conserved site				0	A0A024R7M3	PF00193		A0A024RD82	CL0063		A0A024R1T2	IPR039008
A0A343RZ16	A0A343RZ16_HUMAN	ATP6	2	A0A023I7H5		A0A024R9F4	C8orf78	Chromosome 8 open reading frame 78, isoform CRA_a	1		PF00429	Family	TLV_coat	ENV polyprotein (coat polyprotein)			CL0448	Cargo_bd_muHD	Internalisation of diverse transmembrane cargos from the plasma membrane requires a similarly diverse array of specialized adaptors, this domain is the binding domain of these endocytioc adaptors. The muHD binds directly to the cytosolic tail of the Mid2 (for the transmembrane stress sensor protein Mid2) cargo protein and mediates Mid2 internalization [1]. These are all-beta proteins.	[1]. Syp1 is a conserved endocytic adaptor that contains domains involved in cargo selection and membrane tubulation. Reider A, Barker SL, Mishra SK, Im YJ, Maldonado-Baez L, Hurley JH, Traub LM, Wendland B EMBO J. 28, 3103-3116, (2009). PMID: 19713939										IPR017937	Conserved_site	Thioredoxin, conserved site				0	A0A024R7M3	PF07686		A0A024RD91	CL0266		A0A024R1U9	IPR000326
A0A343SD60	A0A343SD60_HUMAN	ATP6	2	A0A023I7H5		A0A024R9G4	FAM49B	Family with sequence similarity 49, member B, isoform CRA_a	2		PF00430	Coiled-coil	ATP-synt_B	ATP synthase B/B' CF(0)	CL0255		CL0449	G-PATCH	This superfamily is characterised by domains which are related to the G-patch domain in proteins with RNA-binding/splicing activity. This domain affects RNA-splicing by binding to a DExH-box splicing factor.	[1]. Interaction between a G-patch protein and a spliceosomal DEXD/H-box ATPase that is critical for splicing. Silverman EJ, Maeda A, Wei J, Smith P, Beggs JD, Lin RJ Mol Cell Biol. 24, 10101-10110, (2004). PMID: 15542821	[2]. Yeast ntr1/spp382 mediates prp43 function in postspliceosomes. Boon KL, Auchynnikava T, Edwalds-Gilbert G, Barrass JD, Droop AP, Dez C, Beggs JD Mol Cell Biol. 26, 6016-6023, (2006). PMID: 16880513									IPR017948	Conserved_site	Transforming growth factor beta, conserved site				0	A0A024R7M8	PF06244		A0A024RD91	CL0541		A0A024R1U9	IPR016275
A0A343SGN2	A0A343SGN2_HUMAN	ATP6	2	A0A023I7H5		A0A024R9H2	HRSP12	2-iminobutanoate/2-iminopropanoate deaminase, 3.5.99.10, Translation inhibitor L-PSP ribonuclease	4		PF00431	Domain	CUB	CUB domain	CL0164		CL0450	FimbA	This family includes the fimbrillin-A set of fimbrial proteins and the shorter Mfa1 fimbrial set and their associated anchor-proteins Mfa2 [1].	[1]. A conserved fold for fimbrial components revealed by the crystal structure of a putative fimbrial assembly protein (BT1062) from Bacteroides thetaiotaomicron at 2.2 A resolution. Xu Q, Abdubek P, Astakhova T, Axelrod HL, Bakolitsa C, Cai X, Carlton D, Chen C, Chiu HJ, Chiu M, Clayton T, Das D, Deller MC, Duan L, Ellrott K, Farr CL, Feuerhelm J, Grant JC, Grzechnik A, Han GW, Jaroszewski L, J…										IPR017949	Conserved_site	Thaumatin, conserved site				0	A0A024R7M9	PF00001		A0A024RDB5	CL0221		A0A024R1U9	IPR036938
A0A343SGX3	A0A343SGX3_HUMAN	ATP6	2	A0A023I7H5		A0A024R9H7	CCDC26	Coiled-coil domain containing 26, isoform CRA_a	1		PF00432	Repeat	Prenyltrans	Prenyltransferase and squalene oxidase repeat	CL0059		CL0451	FnI-like	This superfamily is characterised by being disulfide-rich, all-beta with an extra C-terminal domain in the fibronectin-like, Fn1, members.											IPR017953	Conserved_site	Carbohydrate kinase, predicted, conserved site				0	A0A024R7N3	PF01585		A0A024RDG5	CL0228		A0A024R1Y5	IPR001650
A0A343SVP1	A0A343SVP1_HUMAN	ATP6	2	A0A023I7H5		A0A024R9I1	SGNE1	Neuroendocrine protein 7B2, Secretogranin-5	3		PF00433	Family	Pkinase_C	Protein kinase C terminal domain			CL0452	Tropomyosin-lke												IPR017954	Conserved_site	Lipid-binding serum glycoprotein, conserved site				0	A0A024R7N3	PF01805		A0A024RDH3	CL0016		A0A024R1Y5	IPR006935
A0A343T092	A0A343T092_HUMAN	ATP6	2	A0A023I7H5		A0A024R9I8	C8orf32	Protein N-terminal glutamine amidohydrolase, 3.5.1.122, Protein NH2-terminal glutamine deamidase	2		PF00434	Family	VP7	Glycoprotein VP7	CL0217		CL0453	Apoptosis-Inhib	This family includes members which are Bax inhibitors.											IPR017956	Conserved_site	AT hook, DNA-binding motif				0	A0A024R7P5	PF00318		A0A024RDH3	CL0031		A0A024R1Y5	IPR014001
A0A343T203	A0A343T203_HUMAN	ATP6	2	A0A023I7H5		A0A024R9I9	TMCO5	Testicular tissue protein Li 205, Transmembrane and coiled-coil domains 5, isoform CRA_a	1		PF00435	Domain	Spectrin	Spectrin repeat			CL0456	Golgi_traff	This superfamily is characterised by comprising multiple-pass membrane proteins that are associated with various aspects of trafficking of molecules into and out of the Golgi apparatus.											IPR017957	Conserved_site	P-type trefoil, conserved site				0	A0A024R7R0	PF18282		A0A024RDH4	CL0525		A0A024R1Y5	IPR021673
A0A343T5I8	A0A343T5I8_HUMAN	ATP6	2	A0A023I7H5		A0A024R9J4	NOV	Nephroblastoma overexpressed gene, isoform CRA_a	3		PF00436	Domain	SSB	Single-strand binding protein family	CL0021		CL0457	4HB_MCP	This superfamily is characterised by a four-helix bundle structure that forms a ubiquitous sensory module in prokaryotic signal-transduction. The 4HB_MCP is always found between two predicted transmembrane helices indicating that it detects only extracellular signals. In many cases the domain is associated with a cytoplasmic HAMP domain suggesting that most proteins carrying the bundle might shar…	[1]. Four-helix bundle: a ubiquitous sensory module in prokaryotic signal transduction. Ulrich LE, Zhulin IB (). PMID: 16306392										IPR017958	Conserved_site	Glutamyl-tRNA(Gln) amidotransferase, subunit B, conserved site				0	A0A024R7R5	PF15914		A0A024RDH5	CL0221		A0A024R1Y5	IPR027417
A0A343T5U2	A0A343T5U2_HUMAN	ATP6	2	A0A023I7H5		A0A024R9J6	C8orf36	E3 SUMO-protein ligase NSE2, E3 SUMO-protein transferase NSE2, Non-structural maintenance of chromosomes element 2 homolog	3		PF00437	Family	T2SSE	Type II/IV secretion system protein	CL0023		CL0458	IIaaRS-ABD	This superfamily is characterised by including the anticodon-binding domain of Class II aaRS and the Brix domain.											IPR017964	Conserved_site	DNA-directed DNA polymerase, family B, conserved site				0	A0A024R7R9	PF02690		A0A024RDJ1	CL0172		A0A024R1Y5	IPR038557
A0A343UDR4	A0A343UDR4_HUMAN	ATP6	2	A0A023I7H5		A0A024R9J7	DCC1	Sister chromatid cohesion protein DCC1	1		PF00438	Domain	S-AdoMet_synt_N	S-adenosylmethionine synthetase, N-terminal domain			CL0459	BRCT-like	The BRCT domain is found predominantly in proteins involved in cell cycle checkpoint functions responsive to DNA damage.											IPR017967	Conserved_site	HMG box A DNA-binding domain, conserved site				0	A0A024R7T3	PF00076		A0A024RDJ7	CL0064		A0A024R1Y5	IPR041204
A0A343UFL4	A0A343UFL4_HUMAN	ATP6	2	A0A023I7H5		A0A024R9K7	C15orf24	ER membrane protein complex subunit 7	2		PF00439	Domain	Bromodomain	Bromodomain			CL0461	Metallothionein	This superfamily contains related families of metallothioneins, prokaryotes and eukaryotes.											IPR017968	Conserved_site	Acylphosphatase, conserved site				0	A0A024R7T3	PF08080		A0A024RDL0	CL0426		A0A024R1Y7	IPR004993
A0A343V6M4	A0A343V6M4_HUMAN	ATP6	2	A0A023I7H5		A0A024R9M5	CEP27	Centrosomal protein 27kDa, isoform CRA_a	1		PF00440	Domain	TetR_N	Bacterial regulatory proteins, tetR family	CL0123		CL0462	TPA-repeat	This superfamily includes several families of this nonapeptide repeat, that carries a characteristic TPA motif. The C-terminal domain of the transcription elongation factor protein Spt5 is necessary for binding to Spt4 to form the functional complex that regulates early transcription elongation by RNA polymerase II.	[1]. Characterization of the Schizosaccharomyces pombe Spt5-Spt4 complex. Schwer B, Schneider S, Pei Y, Aronova A, Shuman S (). PMID: 19460865										IPR017969	Conserved_site	Heavy-metal-associated, conserved site				0	A0A024R7U5	PF13499		A0A024RDN3	CL0063		A0A024R1Z9	IPR005195
A0A343V9V5	A0A343V9V5_HUMAN	ATP6	2	A0A023I7H5		A0A024R9M8	HIATL1	Hippocampus abundant transcript-like 1, isoform CRA_b	1		PF00441	Domain	Acyl-CoA_dh_1	Acyl-CoA dehydrogenase, C-terminal domain	CL0087		CL0464	5_3_exonuc_C	This superfamily includes C-terminal domains from a number of DNA-processing enzymes including T4 RNase H, 5' to 3' exonuclease domain of DNA polymerase Taq, T5 5'-exonuclease, Flap endonuclease-1 (Fen-1 nuclease), and other eukaryotic endonucleases.											IPR017970	Conserved_site	Homeobox, conserved site				0	A0A024R7V5	PF14160		A0A024RDN9	CL0015		A0A024R1Z9	IPR008928
A0A343VBH7	A0A343VBH7_HUMAN	ATP6	2	A0A023I7H5		A0A024R9M9	CHP	Calcium binding protein P22, isoform CRA_a	1		PF00443	Family	UCH	Ubiquitin carboxyl-terminal hydrolase	CL0125		CL0465	Ank	The ankyrin repeat is a short sequence region that is about 30-34 amino-acids in length. Multiple copies of the repeat composed of two beta strands and two alpha helices combine to form long arrays. In general these repeats are involved in protein-protein interactions. This superfamily also includes some families that are arrays of several repeats.	[1]. The ankyrin repeat: a diversity of interactions on a common structural framework. Sedgwick SG, Smerdon SJ Trends Biochem Sci. 24, 311-316, (1999). PMID: 10431175	[2]. The ankyrin repeat as molecular architecture for protein recognition. Mosavi LK, Cammett TJ, Desrosiers DC, Peng ZY Protein Sci. 13, 1435-1448, (2004). PMID: 15152081	[3]. Ankyrin repeat: a unique motif mediating protein-protein interactions. Li J, Mahajan A, Tsai MD Biochemistry. 45, 15168-15178, (2006). PMID: 17176038								IPR017972	Conserved_site	Cytochrome P450, conserved site				0	A0A024R7V5	PF14161		A0A024RDP8	CL0023		A0A024R1Z9	IPR012341
A0A343VCC6	A0A343VCC6_HUMAN	ATP6	2	A0A023I7H5		A0A024R9N3	TMEM85	ER membrane protein complex subunit 4	2		PF00444	Domain	Ribosomal_L36	Ribosomal protein L36			CL0466	PDZ-like	This superfamily comprises families of PDZ domains, which are peptide binding sites.											IPR017974	Conserved_site	Claudin, conserved site				0	A0A024R7V6	PF00071		A0A024RDP8	CL0671		A0A024R216	IPR000313
A0A343VDE0	A0A343VDE0_HUMAN	ATP6	2	A0A023I7H5		A0A024R9P5	C15orf29	Chromosome 15 open reading frame 29, isoform CRA_a	2		PF00445	Domain	Ribonuclease_T2	Ribonuclease T2 family			CL0469	l-integrase_N	This superfamily is characterised by families having 4-5 helices in a bundle of two orthogonally packed alpha-hairpins that are involved in interactions with DNA and proteins.											IPR017975	Conserved_site	Tubulin, conserved site				0	A0A024R7V9	PF00240		A0A024RDR1	CL0375		A0A024R219	IPR000058
A0A343VFF5	A0A343VFF5_HUMAN	ATP6	2	A0A023I7H5		A0A024R9P6	FAM82C	Family with sequence similarity 82, member C, isoform CRA_a	2		PF00446	Family	GnRH	Gonadotropin-releasing hormone			CL0470	ThrE	This superfamily includes two related families of membrane proteins, ThrE, involved in the export of threonine and serine [1]. Members of this superfamily are diverse in sequence and ubiquitous, being found in bacteria, archaea and eukaryotes [1,2].	[1]. The ubiquitous ThrE family of putative transmembrane amino acid efflux transporters. Yen MR, Tseng YH, Simic P, Sahm H, Eggeling L, Saier MH Jr Res Microbiol. 153, 19-25, (2002). PMID: 11881894	[2]. New ubiquitous translocators: amino acid export by Corynebacterium glutamicum and Escherichia coli. Eggeling L, Sahm H Arch Microbiol. 180, 155-160, (2003). PMID: 12879215									IPR017977	Conserved_site	Zona pellucida domain, conserved site				0	A0A024R7V9	PF01428		A0A024RDR5	CL0023		A0A024R219	IPR002653
A0A343VFU8	A0A343VFU8_HUMAN	ATP6	2	A0A023I7H5		A0A024R9Q0	C9orf102	Chromosome 9 open reading frame 102, isoform CRA_a	1		PF00447	Domain	HSF_DNA-bind	HSF-type DNA-binding	CL0123		CL0471	DUF362	This superfamily incldues two uncharacterised families: DUF362 and DUF2088. These families contain a number of potential conserved metal binding residues and may be metalloenzymes.											IPR017979	Conserved_site	GPCR, family 3, conserved site				0	A0A024R7W0	PF00459		A0A024RDS3	CL0175		A0A024R219	IPR035896
A0A343VGN4	A0A343VGN4_HUMAN	ATP6	2	A0A023I7H5		A0A024R9Q8	RBPSUH	Recombining binding protein suppressor of hairless (Drosophila), isoform CRA_a	1		PF00448	Domain	SRP54	SRP54-type protein, GTPase domain	CL0023		CL0472	Peptidase_U	This superfamily includes proteins classed as clan U by the MEROPS database. The proteins are membrane bound peptidases. The clan also includes Pfam:PF10086 which is a related family of uncharacterised proteins.											IPR017983	Conserved_site	GPCR, family 2, secretin-like, conserved site				0	A0A024R7Y5	PF03931		A0A024RDS3	CL0382		A0A024R220	IPR022181
A0A343VIA6	A0A343VIA6_HUMAN	ATP6	2	A0A023I7H5		A0A024R9R5	ZFP106	Zinc finger protein 106 homolog (Mouse), isoform CRA_a	1		PF00449	Domain	Urease_alpha	Urease alpha-subunit, N-terminal domain	CL0034		CL0474	SICA_like	The SICA (schizont-infected cell agglutination) proteins of P. knowlesi, one of the variant antigen gene families, are associated with parasitic virulence. These proteins are comprised of three domains (alpha, beta and C-terminal). The two extracelullar domains, termed SICA alpha and beta, occur with varying copy number. The alpha domain, although it appears to be related to the beta domain, cont…	[1]. The genome of the simian and human malaria parasite Plasmodium knowlesi. Pain A, Bohme U, Berry AE, Mungall K, Finn RD, Jackson AP, Mourier T, Mistry J, Pasini EM, Aslett MA, Balasubrammaniam S, Borgwardt K, Brooks K, Carret C, Carver TJ, Cherevach I, Chillingworth T, Clark TG, Galinski MR, Hall N, Harper D, Harris D, Hauser H, Ivens A, Janssen CS, Keane T, Larke N, Lapp S, Marti M, Moule S,…										IPR017985	Conserved_site	DNA methylase, N-4 cytosine-specific, conserved site				0	A0A024R806	PF10178		A0A024RDT0	CL0100		A0A024R228	IPR004087
A0A343VKL2	A0A343VKL2_HUMAN	ATP6	2	A0A023I7H5		A0A024R9R7	INOC1	Chromatin-remodeling ATPase INO80, 3.6.4.-	4		PF00450	Domain	Peptidase_S10	Serine carboxypeptidase	CL0028		CL0475	Cyclophil-like	This superfamily is characterised by being the core, closed, beta barrel of cyclophilin with complex topology, with some family members lacking the N-terminal strand of cyclophilin but retaining a closed barrel.											IPR017988	Conserved_site	Ribosome-inactivating protein conserved site				0	A0A024R821	PF00076		A0A024RDT6	CL0004		A0A024R228	IPR004088
A0A343VLY4	A0A343VLY4_HUMAN	ATP6	2	A0A023I7H5		A0A024R9S6	FLJ90013	Transmembrane anterior posterior transformation protein 1 homolog	2		PF00451	Domain	Toxin_2	Scorpion short toxin, BmKK2	CL0054		CL0476	tRNA-IECD_N	This superfamily contains families of the N-termini of tRNA-splicing endonucleases.											IPR017990	Conserved_site	Connexin, conserved site				0	A0A024R821	PF08662		A0A024RDT8	CL0221		A0A024R228	IPR012987
A0A343W521	A0A343W521_HUMAN	ATP6	2	A0A023I7H5		A0A024R9S7	C9orf3	Chromosome 9 open reading frame 3, isoform CRA_a	1		PF00452	Family	Bcl-2	Apoptosis regulator proteins, Bcl-2 family	CL0551		CL0477	TRD	This superfamily includes domains that are found associated with restriction modification methylase enzymes. These domains are involved in defining the DNA substrate specificity.											IPR018000	Conserved_site	Neurotransmitter-gated ion-channel, conserved site				0	A0A024R836	PF10180		A0A024RDU3	CL0229		A0A024R228	IPR036612
A0A343YS70	A0A343YS70_HUMAN	ATP6	2	A0A023I7H5		A0A024R9U4	LOC201895	Small integral membrane protein 14	1		PF00453	Family	Ribosomal_L20	Ribosomal protein L20			CL0478	ATPase_I_AtpR	These two subunits from the F-type and N-type ATPases have been demonstrated to from functionally distinct components of these two different ATPases[1].	[1]. Characterization of the N-ATPase, a distinct, laterally transferred Na+-translocating form of the bacterial F-type membrane ATPase. Dibrova DV, Galperin MY, Mulkidjanian AY (). PMID: 20472544										IPR018016	Conserved_site	Nucleoside phosphorylase, conserved site				0	A0A024R847	PF04190		A0A024RDV3	CL0065		A0A024R229	IPR011050
A0A343YS87	A0A343YS87_HUMAN	ATP6	2	A0A023I7H5		A0A024R9U9	RP1-112K5.2	Pre-rRNA-processing protein TSR2 homolog	1		PF00454	Family	PI3_PI4_kinase	Phosphatidylinositol 3- and 4-kinase	CL0016		CL0479	PLD	This superfamily includes proteins that are related to Phospholiase D.											IPR018023	Conserved_site	Ribosome maturation protein SBDS, conserved site				0	A0A024R849	PF00001		A0A024RDV9	CL0023		A0A024R229	IPR019316
A0A344A1H2	A0A344A1H2_HUMAN	ATP6	2	A0A023I7H5		A0A024R9V3	KIAA0746	KIAA0746 protein, isoform CRA_a	1		PF00455	Domain	DeoRC	DeoR C terminal sensor domain	CL0246		CL0481	HUH	This superfamily consists of families of transposases that use tyrosine as nucleophiles and contain a conserved HUH motif where U is a non-conserved hydrophobic residue. Particular examples are the Y1 and Y2 transposases. Y1 transposases come from the IS608 group and the Y2 from the IS91 group. These transposases are nucleases involved in initiating rolling-circle plasmid replication, in initiati…	[1]. Crystal structure of a metal ion-bound IS200 transposase. Lee HH, Yoon JY, Kim HS, Kang JY, Kim KH, Kim DJ, Ha JY, Mikami B, Yoon HJ, Suh SW J Biol Chem. 281, 4261-4266, (2006). PMID: 16340015										IPR018030	Conserved_site	Fimbrial membrane usher, conserved site				0	A0A024R878	PF00100		A0A024RDX2	CL0192		A0A024R229	IPR039473
A0A344AIY7	A0A344AIY7_HUMAN	ATP6	2	A0A023I7H5		A0A024R9V5	FLJ13197	Uncharacterized protein	1		PF00456	Domain	Transketolase_N	Transketolase, thiamine diphosphate binding domain	CL0254		CL0482	Prolamin	This superfamily is characterised by families with only slightly differing disulfide-bonding patterning.	[1]. Homology between DUF784, DUF1278 domains and the plant prolamin superfamily typifies evolutionary changes of disulfide bonding patterns. Zhang D Cell Cycle. 8, 3428-3430, (2009). PMID: 19806031										IPR018038	Conserved_site	Ribosomal protein L30, conserved site				0	A0A024R887	PF13873		A0A024RDX4	CL0118		A0A024R229	IPR039477
A0A344AJ01	A0A344AJ01_HUMAN	ATP6	2	A0A023I7H5		A0A024R9W1	SPIN2	Spindlin family, member 2, isoform CRA_a	2		PF00457	Domain	Glyco_hydro_11	Glycosyl hydrolases family 11	CL0004		CL0483	PreATP-grasp	This superfamily is characterised by bein g the copies of the domain that precedes the ATP-grasp domain common to all superfamily members, and it can contain a substrate-binding function.	[1]. Dual binding sites for translocation catalysis by Escherichia coli glutathionylspermidine synthetase. Pai CH, Chiang BY, Ko TP, Chou CC, Chong CM, Yen FJ, Chen S, Coward JK, Wang AH, Lin CH EMBO J. 25, 5970-5982, (2006). PMID: 17124497										IPR018039	Conserved_site	Intermediate filament protein, conserved site				0	A0A024R894	PF00354		A0A024RDY0	CL0020		A0A024R235	IPR001878
A0A344AJ14	A0A344AJ14_HUMAN	ATP6	2	A0A023I7H5		A0A024R9W3	FLJ20273	RNA-binding protein 47, RNA-binding motif protein 47	2		PF00458	Domain	WHEP-TRS	WHEP-TRS domain	CL0600		CL0484	Peroxisome	This superfamily combines peroxisome families and a family found at the C-terminus of metazoan phosphoribosyltransferases.											IPR018042	Conserved_site	Aspartate kinase, conserved site				0	A0A024R899	PF00642		A0A024RDZ1	CL0028		A0A024R235	IPR002058
A0A344AJ38	A0A344AJ38_HUMAN	ATP6	2	A0A023I7H5		A0A024R9Y2	KIAA1267	KIAA1267, isoform CRA_a	1		PF00459	Family	Inositol_P	Inositol monophosphatase family	CL0171		CL0486	Fer2	The 2Fe-2S ferredoxin family have a general core structure consisting of beta(2)-alpha-beta(2) which abeta-grasp type fold. The domani is around one hundred amino acids with four conserved cysteine residues to which the 2Fe-2S cluster is ligated.	[1]. Crystallization and preliminary X-ray diffraction analysis of a [2Fe-2S] ferredoxin (FdVI) from Rhodobacter capsulatus. Armengaud J, Sainz G, Jouanneau Y, Sieker LC Acta Crystallogr D Biol Crystallogr. 57, 301-303, (2001). PMID: 11173487										IPR018043	Conserved_site	Sodium:galactoside symporter, conserved site				0	A0A024R899	PF18386		A0A024RDZ9	CL0123		A0A024R235	IPR003604
A0A344AJ72	A0A344AJ72_HUMAN	ATP6	2	A0A023I7H5		A0A024R9Y9	SPIN-2	Spindlin-like protein 2, isoform CRA_a	2		PF00460	Family	Flg_bb_rod	Flagella basal body rod protein			CL0487	FKBP	This superfamily includes the FKBP domain which catalyses the peptidyl-prolyl cis-trans isomerisation reaction. The superfamily also includes the C-terminal domain of GreA and the c-terminal dmoain of 3-mercaptopyruvate sulfurtransferase.											IPR018045	Conserved_site	Sulphate anion transporter, conserved site				0	A0A024R8B2	PF00036		A0A024RE02	CL0214		A0A024R235	IPR036875
A0A344AJ98	A0A344AJ98_HUMAN	ATP6	2	A0A023I7H5		A0A024RA01	MGC42090	Transmembrane protein 196	1		PF00462	Domain	Glutaredoxin	Glutaredoxin	CL0172		CL0488	FixH-like	This is a superfamily of FixH-like proteins of unknown function.											IPR018046	Conserved_site	Pili assembly chaperone, conserved site				0	A0A024R8B2	PF13499		A0A024RE05	CL0030		A0A024R235	IPR043519
A0A344AJB6	A0A344AJB6_HUMAN	ATP6	2	A0A023I7H5		A0A024RA08	LOC90693	LOC90693 protein, isoform CRA_a	1		PF00463	Domain	ICL	Isocitrate lyase family	CL0151		CL0489	SAF	This superfamily includes SAF-like domains that possess a bet-clip fold [1].	[1]. The emergence of catalytic and structural diversity within the beta-clip fold. Iyer LM, Aravind L Proteins. 55, 977-991, (2004). PMID: 15146494										IPR018047	Conserved_site	Ammonium transporter, conserved site				0	A0A024R8B3	PF10265		A0A024RE06	CL0021		A0A024R235	IPR045100
A0A344AJC9	A0A344AJC9_HUMAN	ATP6	2	A0A023I7H5		A0A024RA24	FLJ20323	GATOR complex protein MIO zinc-ribbon like domain-containing protein	2		PF00464	Domain	SHMT	Serine hydroxymethyltransferase	CL0061		CL0490	PepSY_TM-like	This is a superfamily of PepSY-transmembrane-like domain families.											IPR018048	Conserved_site	CXC chemokine, conserved site				0	A0A024R8B7	PF11571		A0A024RE06	CL0078		A0A024R244	IPR000719
A0A344AJE3	A0A344AJE3_HUMAN	ATP6	2	A0A023I7H5		A0A024RA25	MPP6	Membrane protein, palmitoylated 6 (MAGUK p55 subfamily member 6), isoform CRA_c	1		PF00465	Family	Fe-ADH	Iron-containing alcohol dehydrogenase	CL0224		CL0491	LYR-like	This is a superfamily of sequences with the characteristic LYR, or similar, motif. In some yeasts this family plays a role in Fe-S cluster biogenesis in mitochondria.											IPR018049	Conserved_site	Interleukin-7/Interleukin-9, conserved site				0	A0A024R8B8	PF10240		A0A024RE06	CL0459		A0A024R244	IPR000980
A0A344AJF5	A0A344AJF5_HUMAN	ATP6	2	A0A023I7H5		A0A024RA36	KIAA0241	KIAA0241, isoform CRA_b	1		PF00466	Family	Ribosomal_L10	Ribosomal protein L10			CL0492	S4	This superfamily includes diverse proteins related to the ribosomal S4 protein.											IPR018050	Conserved_site	Phosphomannose isomerase, type I, conserved site				0	A0A024R8C5	PF06179		A0A024RE13	CL0196		A0A024R244	IPR001245
A0A344AJG9	A0A344AJG9_HUMAN	ATP6	2	A0A023I7H5		A0A024RA57	MGC72075	Protein FAM221A	1		PF00467	Family	KOW	KOW motif	CL0107		CL0493	PTS_EIIC												IPR018052	Conserved_site	Aldose 1-epimerase, conserved site				0	A0A024R8C7	PF09138		A0A024RE13	CL0539		A0A024R244	IPR008266
A0A344AJI1	A0A344AJI1_HUMAN	ATP6	2	A0A023I7H5		A0A024RA58	DFNA5	Deafness, autosomal dominant 5, isoform CRA_a	2		PF00468	Family	Ribosomal_L34	Ribosomal protein L34			CL0494	DnaA_N	This superfamily includes the N-terminal domain from DnaA and the N-terminal domain from DNA polymerase III alpha subunit.											IPR018054	Conserved_site	Chromogranin, conserved site				0	A0A024R8E4	PF05891		A0A024RE14	CL0302		A0A024R244	IPR011009
A0A344AJJ5	A0A344AJJ5_HUMAN	ATP6	2	A0A023I7H5		A0A024RA60	FLJ10803	Cytochrome c oxidase assembly factor 1 homolog	2		PF00469	Family	F-protein	Negative factor, (F-Protein) or Nef			CL0496	Tad-like	This is a superfamily of Tad-like protein families all involved in Flp pilus biogenesis.	[1]. Nonspecific adherence by Actinobacillus actinomycetemcomitans requires genes widespread in bacteria and archaea. Kachlany SC, Planet PJ, Bhattacharjee MK, Kollia E, DeSalle R, Fine DH, Figurski DH J Bacteriol. 182, 6169-6176, (2000). PMID: 11029439	[2]. The tad locus: postcards from the widespread colonization island. Tomich M, Planet PJ, Figurski DH Nat Rev Microbiol. 5, 363-375, (2007). PMID: 17435791									IPR018056	Conserved_site	Kringle, conserved site				0	A0A024R8E9	PF15740		A0A059NXK6	CL0229		A0A024R244	IPR012234
A0A344AJK7	A0A344AJK7_HUMAN	ATP6	2	A0A023I7H5		A0A024RA73	CARD4	Caspase recruitment domain family, member 4, Caspase recruitment domain family, member 4, isoform CRA_b, Nucleotide-binding oligomerization domain containing 1 isoform 1	3		PF00471	Family	Ribosomal_L33	Ribosomal protein L33	CL0167		CL0497	GST_C	This clan represents the C-terminal domain of Glutathione S-transferase.											IPR018062	Conserved_site	HTH domain AraC-type, conserved site				0	A0A024R8F2	PF15120		A0A059QUW1	CL0425		A0A024R244	IPR017441
A0A344AJN3	A0A344AJN3_HUMAN	ATP6	2	A0A023I7H5		A0A024RA74	URG4	Up-regulated gene 4, isoform CRA_a	1		PF00472	Family	RF-1	RF-1 domain	CL0337		CL0498	Nribosyltransf	This superfamily includes the N-deoxyribosyltransferase and ADP-ribosyl cyclase-like families as well as the family that includes the hypothetical protein PA1492 for which the structure is known. PA1942 has a very similar putative active site and is predicted by SCOP to have a deoxyribosyltransferase activity [1].	[1]. Data growth and its impact on the SCOP database: new developments. Andreeva A, Howorth D, Chandonia JM, Brenner SE, Hubbard TJ, Chothia C, Murzin AG (). PMID: 18000004										IPR018063	Conserved_site	SAM-dependent methyltransferase RsmI, conserved site				0	A0A024R8I0	PF00651		A0A059VC25	CL0016		A0A024R244	IPR020635
A0A344AJQ9	A0A344AJQ9_HUMAN	ATP6	2	A0A023I7H5		A0A024RA77	FLJ22313	Ubiquitin-like domain-containing protein	2		PF00473	Family	CRF	Corticotropin-releasing factor family			CL0499	O-anti_assembly	This superfamily is characterised by a group of bacterial proteins that lie in the membrane. The families are all enzymes involved in the assembly of O-antigen lipopolysaccharide, and include O-antigen flippase, polymerase and ligase, the flippase being the putative transporter [1].	[1]. A putative HCO3- transporter in the cyanobacterium Synechococcus sp. strain PCC 7942. Bonfil DJ, Ronen-Tarazi M, Sultemeyer D, Lieman-Hurwitz J, Schatz D, Kaplan A FEBS Lett. 430, 236-240, (1998). PMID: 9688546	[2]. Interplay of the Wzx translocase and the corresponding polymerase and chain length regulator proteins in the translocation and periplasmic assembly of lipopolysaccharide o antigen. Marolda CL, Tatar LD, Alaimo C, Aebi M, Valvano MA J Bacteriol. 188, 5124-5135, (2006). PMID: 16816184	[3]. Interplay of the Wzx translocase and the corresponding polymerase and chain length regulator proteins in the translocation and periplasmic assembly of lipopolysaccharide o antigen. Marolda CL, Tatar LD, Alaimo C, Aebi M, Valvano MA J Bacteriol. 188, 5124-5135, (2006). PMID: 16816184	[4]. Escherichia coli serogroup O2 and O28ac O-antigen gene cluster sequences and detection of pathogenic E. coli O2 and O28ac by PCR. Fratamico PM, Yan X, Liu Y, DebRoy C, Byrne B, Monaghan A, Fanning S, Bolton D Can J Microbiol. 56, 308-316, (2010). PMID: 20453897							IPR018065	Conserved_site	Ribosomal protein L34e, conserved site				0	A0A024R8I0	PF10523		A0A059VC25	CL0072		A0A024R244	IPR023420
A0A344AJS3	A0A344AJS3_HUMAN	ATP6	2	A0A023I7H5		A0A024RA80	TXNDC3	Thioredoxin domain containing 3 (Spermatozoa), isoform CRA_a	1		PF00474	Family	SSF	Sodium:solute symporter family	CL0062		CL0500	Glycine-zipper	This superfamily is characterised by having long glycine-zipper motifs, characteristically GxxxGxxxG [1], often with several contiguous copies. The x following the G is frequently found to be an alanine. This sequence region can be found in both symmetric and non-symmetrical membrane structures, and is relatively common. The fact that such a large fraction of the relatively few known membrane cha…	[1]. Transmembrane glycine zippers: physiological and pathological roles in membrane proteins. Kim S, Jeon TJ, Oberai A, Yang D, Schmidt JJ, Bowie JU Proc Natl Acad Sci U S A. 102, 14278-14283, (2005). PMID: 16179394										IPR018066	Conserved_site	Tubby, C-terminal, conserved site				0	A0A024R8I2	PF00627		A0A059VC25	CL0632		A0A024R244	IPR035838
A0A344AJT6	A0A344AJT6_HUMAN	ATP6	2	A0A023I7H5		A0A024RA81	NT5C3	5'-nucleotidase, 3.1.3.5	3		PF00475	Family	IGPD	Imidazoleglycerol-phosphate dehydratase	CL0329		CL0502	STAS	This superfamily includes proteins that have a STAS domain.											IPR018067	Conserved_site	Protein phosphatase 2A regulatory subunit PR55, conserved site				0	A0A024R8I5	PF12260		A0A068F658	CL0058		A0A024R244	IPR036860
A0A344AJV0	A0A344AJV0_HUMAN	ATP6	2	A0A023I7H5		A0A024RA83	AAA1	AAA1 protein, isoform CRA_b	1		PF00476	Family	DNA_pol_A	DNA polymerase family A			CL0503	SOR	According to SCOP this superfamily includes the superoxide reductase domain as well as the C-terminal domain of desulfoferrodoxin.	[1]. X-ray crystallographic analysis of the sulfur carrier protein SoxY from Chlorobium limicola f. thiosulfatophilum reveals a tetrameric structure. Stout J, Van Driessche G, Savvides SN, Van Beeumen J Protein Sci. 16, 589-601, (2007). PMID: 17327392										IPR018071	Conserved_site	Omega-atracotoxin, conserved site				0	A0A024R8I5	PF14875		A0A068F658	CL0369		A0A024R247	IPR006001
A0A344AJW9	A0A344AJW9_HUMAN	ATP6	2	A0A023I7H5		A0A024RA85	CDC2L5	Cell division cycle 2-like 5 (Cholinesterase-related cell division controller), isoform CRA_a	3		PF00477	Disordered	LEA_5	Small hydrophilic plant seed protein	CL0385		CL0504	Phage_barrel	This superfamily consists of a variety of bacteriophage protein families. Structurally members of this family contain a beta barrel.											IPR018072	Conserved_site	Conotoxin, alpha-type, conserved site				0	A0A024R8I7	PF01553		A0A068L529	CL0167		A0A024R247	IPR027417
A0A344AJX5	A0A344AJX5_HUMAN	ATP6	2	A0A023I7H5		A0A024RAA1	PQLC2	PQ loop repeat containing 2 isoform 1, PQ loop repeat containing 2, isoform CRA_b	1		PF00478	Domain	IMPDH	IMP dehydrogenase / GMP reductase domain	CL0036		CL0505	Pentapeptide	This clan includes proteins that form a four sided parallel beta helix. They are generally compoased of pentapeptide repeat motifs.											IPR018073	Conserved_site	Proteinase inhibitor I25, cystatin, conserved site				0	A0A024R8I8	PF11414		A0A068L529	CL0561		A0A024R248	IPR011029
A0A344AJY9	A0A344AJY9_HUMAN	ATP6	2	A0A023I7H5		A0A024RAA7	ADIB	Adiponectin B, Complement component 1, q subcomponent, C chain, isoform CRA_a	2		PF00479	Domain	G6PD_N	Glucose-6-phosphate dehydrogenase, NAD binding domain	CL0063		CL0506	Succ_CoA_synth	This superfamily includes the flavodoxin like domain of succinyl-CoA synthetase and other related enzymes.											IPR018074	Conserved_site	Ubiquitin-activating enzyme E1, conserved site				0	A0A024R8M6	PF05978		A0A075B6H5	CL0011		A0A024R248	IPR042146
A0A344AK15	A0A344AK15_HUMAN	ATP6	2	A0A023I7H5		A0A024RAB1	DDEFL1	Development and differentiation enhancing factor-like 1, isoform CRA_a	3		PF00480	Family	ROK	ROK family	CL0108		CL0507	Fungal_trans	This putative domain is found in fungal transcription factors.											IPR018078	Conserved_site	DNA-binding, RecF, conserved site				0	A0A024R8Q2	PF04493		A0A075B6H7	CL0011		A0A024R248	IPR043574
A0A344AK24	A0A344AK24_HUMAN	ATP6	2	A0A023I7H5		A0A024RAB4	ALPL	Alkaline phosphatase, 3.1.3.1	5		PF00481	Family	PP2C	Protein phosphatase 2C	CL0238		CL0508	YkuD	This superfamily incldues the L,D-transpeptidase catalytic domain.											IPR018079	Conserved_site	Ribosomal protein S4, conserved site				0	A0A024R8U5	PF00076		A0A075B6H8	CL0011		A0A024R259	IPR003890
A0A344AK39	A0A344AK39_HUMAN	ATP6	2	A0A023I7H5		A0A024RAB5	RAP1GA1	RAP1, GTPase activating protein 1, isoform CRA_b	2		PF00482	Domain	T2SSF	Type II secretion system (T2SS), protein F			CL0509	RBP11-like	This superfamily is characterised by all members carrying RNA Polymerase alpha subunit, chain A, domain 2. The member families form homo- and hetero-dimers.											IPR018080	Conserved_site	Band 7/stomatin-like, conserved site				0	A0A024R8W0	PF00270		A0A075B6H9	CL0011		A0A024R259	IPR016024
A0A344AK54	A0A344AK54_HUMAN	ATP6	2	A0A023I7H5		A0A024RAB9	ADIA	Adiponectin A, Complement component 1, q subcomponent, B chain, isoform CRA_a	1		PF00483	Family	NTP_transferase	Nucleotidyl transferase	CL0110		CL0511	Retroviral_zf	This superfamily has zinc-finger domains from GAG proteins, HIV nucleocapsids, nucleocapsid proteins from mason-pfizer monkey virus, and from other nucleic-acid binding proteins. Sometimes the domains appears in duplicate.											IPR018083	Conserved_site	Sterol reductase, conserved site				0	A0A024R8W0	PF00271		A0A075B6I0	CL0011		A0A024R282	IPR002110
A0A344AK65	A0A344AK65_HUMAN	ATP6	2	A0A023I7H5		A0A024RAC6	TCEB3	Elongin-A	1		PF00484	Domain	Pro_CA	Carbonic anhydrase			CL0512	CRAL_TRIO	This superfamily includes the CRAL-TRIO domain.											IPR018084	Conserved_site	Hok/gef cell toxic protein, conserved site				0	A0A024R8W1	PF15146		A0A075B6I1	CL0011		A0A024R282	IPR036770
A0A344AK77	A0A344AK77_HUMAN	ATP6	2	A0A023I7H5		A0A024RAC8	C1orf201	Chromosome 1 open reading frame 201, isoform CRA_b	1		PF00485	Domain	PRK	Phosphoribulokinase / Uridine kinase family	CL0023		CL0513	LCCL-domain	This superfamily is characterised by an unusual fold exemplified in PDB:1jbi. Vertebrate members are the cysteine-rich secretory protein LCCL domain-containing proteins including Colchin. The fungal members are found to be necessary for histone de-acetylation.											IPR018086	Conserved_site	NADH:ubiquinone oxidoreductase, subunit 1, conserved site				0	A0A024R8W2	PF00097		A0A075B6I3	CL0011		A0A024R292	IPR002347
A0A344AK90	A0A344AK90_HUMAN	ATP6	2	A0A023I7H5		A0A024RAC9	ZUBR1	Zinc finger, UBR1 type 1, isoform CRA_c	1		PF00486	Domain	Trans_reg_C	Transcriptional regulatory protein, C terminal	CL0123		CL0515	LTXXQ-like	This is a superfamily of members all carrying the repeated LTxxQ paired sequence-motif region.											IPR018087	Conserved_site	Glycoside hydrolase, family 5, conserved site				0	A0A024R8W9	PF15169		A0A075B6I4	CL0011		A0A024R292	IPR020904
A0A344AKA5	A0A344AKA5_HUMAN	ATP6	2	A0A023I7H5		A0A024RAD9	C1orf63	Arginine/serine-rich protein 1	2		PF00487	Domain	FA_desaturase	Fatty acid desaturase	CL0713		CL0516	ISP-domain	This superfamily is characterised by Rieske Iron-sulfur families of the [2Fe-2S] type including NADH-nitrite reductase small subunit NirD proteins. This domain has an all-beta rubredoxin-like fold.											IPR018091	Conserved_site	Phosphoenolpyruvate carboxykinase, GTP-utilising, conserved site				0	A0A024R8X4	PF13640		A0A075B6I6	CL0011		A0A024R292	IPR036291
A0A344AKB9	A0A344AKB9_HUMAN	ATP6	2	A0A023I7H5		A0A024RAE1	C1orf33	Ribosome assembly factor mrt4	2		PF00488	Domain	MutS_V	MutS domain V	CL0023		CL0517	MBOAT-like	This is a large superfamily of different enzymes. All biochemically characterised members of the superfamily encode enzymes that transfer organic acids, typically fatty acids, onto hydroxyl groups of membrane-embedded targets.	[1]. A family of eukaryotic lysophospholipid acyltransferases with broad specificity. Stahl U, Stalberg K, Stymne S, Ronne H FEBS Lett. 582, 305-309, (2008). PMID: 18154737	[2]. A superfamily of membrane-bound O-acyltransferases with implications for wnt signaling. Hofmann K Trends Biochem Sci 25, 111-112, (2000). PMID: 10694878									IPR018093	Conserved_site	BCCT transporter, conserved site				0	A0A024R8Y0	PF03800		A0A075B6I7	CL0011		A0A024R292	IPR045022
A0A344AKD1	A0A344AKD1_HUMAN	ATP6	2	A0A023I7H5		A0A024RAE5	MGC10993	Transmembrane protein 177	1		PF00489	Domain	IL6	Interleukin-6/G-CSF/MGF family	CL0053		CL0520	Keratin_assoc	Families in this clan are cysteine-rich and are from proteins associated with Keratin.											IPR018095	Conserved_site	Thymidylate kinase, conserved site				0	A0A024R8Y7	PF13489		A0A075B6I9	CL0011		A0A024R294	IPR009829
A0A344AKE3	A0A344AKE3_HUMAN	ATP6	2	A0A023I7H5		A0A024RAG1	MGC4268	AMMECR1 domain-containing protein	1		PF00490	Domain	ALAD	Delta-aminolevulinic acid dehydratase	CL0036		CL0521	GOLD-like	This superfamily is characterised by proteins with a sandwich structure of 8 strands in 2 sheets as a jelly-roll. The structure has similarity to the Nucleoplasmin-like/VP fold. The members are all involved in golgi trafficking.	[1]. The GOLD domain, a novel protein module involved in Golgi function and secretion. Anantharaman V, Aravind L (). PMID: 12049664	[2]. The Sec14-superfamily and the regulatory interface between phospholipid metabolism and membrane trafficking. Mousley CJ, Tyeryar KR, Vincent-Pope P, Bankaitis VA Biochim Biophys Acta. 1771, 727-736, (2007). PMID: 17512778									IPR018096	Conserved_site	Interleukin-4/interleukin-13, conserved site				0	A0A024R8Z5	PF03650		A0A075B6J1	CL0011		A0A024R294	IPR042031
A0A344AKF8	A0A344AKF8_HUMAN	ATP6	2	A0A023I7H5		A0A024RAG6	ADIC	Adiponectin C, Complement component 1, q subcomponent, A chain, isoform CRA_a	2		PF00491	Domain	Arginase	Arginase family	CL0302		CL0522	YbjQ-like	This superfamily is characterised by chains that form pentamers. Family structures are beta/alpha-propellers with additional short beta-strands that promote oligomeric assembly. Family members appear to be heavy-metal binding proteins.											IPR018097	Conserved_site	EGF-like calcium-binding, conserved site				0	A0A024R8Z8	PF13092		A0A075B6J2	CL0011		A0A024R297	IPR003671
A0A344ARN7	A0A344ARN7_HUMAN	ATP6	2	A0A023I7H5		A0A024RAH2	DSCR1L2	Down syndrome critical region gene 1-like 2, isoform CRA_b	1		PF00493	Domain	MCM	MCM P-loop domain	CL0023		CL0523	GAG-polyprotein	This superfamily is characterised by family members that are derived from retrotransposons of the copia-type.											IPR018098	Conserved_site	Ribosomal S24e conserved site				0	A0A024R903	PF12931		A0A075B6J6	CL0011		A0A024R297	IPR042567
A0A344ASA8	A0A344ASA8_HUMAN	ATP6	2	A0A023I7H5		A0A024RAJ5	COL4A3BP	Ceramide transfer protein, Collagen type IV alpha-3-binding protein	3		PF00494	Domain	SQS_PSY	Squalene/phytoene synthase	CL0613		CL0524	MPT63-MPB63	This superfamily is characterised by extracellular proteins with immuno-protectivce receptor domains on their surfaces resembling Ig domains. These are putative lipoproteins.											IPR018099	Conserved_site	Purine phosphorylase, family 2, conserved site				0	A0A024R903	PF12932		A0A075B6J9	CL0011		A0A024R2A8	IPR002190
A0A345ALM1	A0A345ALM1_HUMAN	ATP6	2	A0A023I7H5		A0A024RAL1	CSPG2	Chondroitin sulfate proteoglycan 2 (Versican), isoform CRA_c	2		PF00496	Domain	SBP_bac_5	Bacterial extracellular solute-binding proteins, family 5 Middle	CL0177		CL0525	pap2	The PAP2 superfamily is characterised by being mult-helical, with the core consisting of a 5-helical bundle. Normally the family will bind cofactor at the beginning of the third helix. The superfamily includes the enzyme type 2 phosphatidic acid phosphatase (PAP2), Glucose-6-phosphatase EC:3.1.3.9, Phosphatidylglycerophosphatase B EC:3.1.3.27 and bacterial acid phosphatase EC:3.1.3.2. The family …	[1]. Identification of a novel phosphatase sequence motif. Stukey J, Carman GM Protein Sci 6, 469-472, (1997). PMID: 9041652	[2]. An unexpected structural relationship between integral membrane phosphatases and soluble haloperoxidases. Neuwald AF Protein Sci 6, 1764-1767, (1997). PMID: 9260289	[3]. X-ray structure of a vanadium-containing enzyme: chloroperoxidase from the fungus Curvularia inaequalis. Messerschmidt A, Wever R Proc Natl Acad Sci U S A 93, 392-396, (1996). PMID: 8552646								IPR018101	Conserved_site	Translation elongation factor Ts, conserved site				0	A0A024R923	PF04949		A0A075B6K0	CL0011		A0A024R2A8	IPR037445
A0A345WHV4	A0A345WHV4_HUMAN	ATP6	2	A0A023I7H5		A0A024RAL9	C5orf21	Chromosome 5 open reading frame 21, isoform CRA_b	1		PF00497	Domain	SBP_bac_3	Bacterial extracellular solute-binding proteins, family 3	CL0177		CL0526	SUKH	SUKH superfamily unites a diverse group of proteins including Smi1/Knr4, PGs2, Fbxo3, Skip16, Syd, herpesviral US22, IRS1 and TRS1, and their bacterial homologs [1].	[1]. A novel immunity system for bacterial nucleic acid degrading toxins and its recruitment in various eukaryotic and DNA viral systems. Zhang D, Iyer LM, Aravind L Nucleic Acids Res. 39, 4532-4552, (2011). PMID: 21306995										IPR018102	Conserved_site	Ribosomal S11, conserved site				0	A0A024R929	PF07738		A0A075B6K2	CL0011		A0A024R2A8	IPR041898
A0A345WIZ4	A0A345WIZ4_HUMAN	ATP6	2	A0A023I7H5		A0A024RAN0	MGC13034	Transmembrane protein 174	1		PF00498	Family	FHA	FHA domain	CL0357		CL0527	Sm-like	Conserved domain of core RNA-binding proteins of mRNA splicing and rRNA processing complexes, with a SH3-like Beta-barrel	[1]. RNA binding in an Sm core domain: X-ray structure and functional analysis of an archaeal Sm protein complex. Toro I, Thore S, Mayer C, Basquin J, Seraphin B, Suck D EMBO J. 20, 2293-2303, (2001). PMID: 11331594	[2]. Crystal structures of two Sm protein complexes and their implications for the assembly of the spliceosomal snRNPs. Kambach C, Walke S, Young R, Avis JM, de la Fortelle E, Raker VA, Luhrmann R, Li J, Nagai K Cell 96, 375-387, (1999). PMID: 10025403	[3]. Comparative genomics and evolution of proteins involved in RNA metabolism. Anantharaman V, Koonin EV, Aravind L Nucleic Acids Res. 30, 1427-1464, (2002). PMID: 11917006	[4]. Ataxin-2, global regulators of bacterial gene expression, and spliceosomal snRNP proteins share a conserved domain. Neuwald AF, Koonin EV J Mol Med 76, 3-5, (1998). PMID: 9462862	[5]. Novel conserved domains in proteins with predicted roles in eukaryotic cell-cycle regulation, decapping and RNA stability. Anantharaman V, Aravind L (). PMID: 15257761						IPR018103	Conserved_site	Translationally controlled tumour protein, conserved site				0	A0A024R968	PF00122		A0A075B6K4	CL0011		A0A024R2A8	IPR041899
A0A346LZR1	A0A346LZR1_HUMAN	ATP6	2	A0A023I7H5		A0A024RAQ1	CSDA	Cold shock domain protein A, isoform CRA_a	3		PF00499	Family	Oxidored_q3	NADH-ubiquinone/plastoquinone oxidoreductase chain 6			CL0528	DUF1214	Members of this clan usually appear in pairs on the same sequence. In cases where there is only a single example of the domain, there is often a second protein containing a single domain that is located sequentially along the chromosome. The crystal structure of pdb:2P3Y reveals that Pfam:PF06863 and Pfam:PF06742 come together to from a deep, positively charged pocket or cleft. Structural compari…											IPR018104	Conserved_site	Translation initiation factor 1A (eIF-1A), conserved site				0	A0A024R968	PF00689		A0A075B6K5	CL0011		A0A024R2B0	IPR011989
A0A346LZV1	A0A346LZV1_HUMAN	ATP6	2	A0A023I7H5		A0A024RAQ4	PRH1	Proline-rich protein HaeIII subfamily 1, isoform CRA_b	1		PF00500	Domain	Late_protein_L1	L1 (late) protein	CL0055		CL0529	FMN-dep-NRtase	This superfamily is involved in the reduction of nitrogen containing compounds. Members of this family utilise FMN as a cofactor and are often found to be homodimers. Possible characteristics include Oxygen-insensitive NAD(P)H nitroreductase (FMN-dependent nitroreductase) (Dihydropteridine reductase) and NADH dehydrogenase. A number of the proteins are described as oxidoreductases. They are prima…											IPR018106	Conserved_site	CAP, conserved site, N-terminal				0	A0A024R968	PF00690		A0A075B6K6	CL0011		A0A024R2B0	IPR016024
A0A346LZY5	A0A346LZY5_HUMAN	ATP6	2	A0A023I7H5		A0A024RAQ7	LOC92270	V-type proton ATPase subunit S1-like protein	1		PF00501	Family	AMP-binding	AMP-binding enzyme	CL0378		CL0530	DNase_I-like	This superfamily is characterised by members with an alpha-beta four-layer sandwich structure. It includes DNase I-like families of DNA-repair enzyme exonuclease III, DNA repair endonucleases, deoxyribonuclease I, endonuclease domain of retro-transposons. It also includes families of inositol polyphosphatases and shingomyelins-phosphodiesterases.											IPR018107	Conserved_site	Sodium:dicarboxylate symporter, conserved site				0	A0A024R968	PF00702		A0A075B6L6	CL0011		A0A024R2B0	IPR021133
A0A346M003	A0A346M003_HUMAN	ATP6	2	A0A023I7H5		A0A024RAR3	LOC317671	LOC317671, isoform CRA_b	1		PF00502	Domain	Phycobilisome	Phycobilisome protein	CL0090		CL0531	AMP-binding_C	This superfamily contains domains found at the C-terminus of AMP-binding enzyme.											IPR018109	Conserved_site	Folylpolyglutamate synthetase, conserved site				0	A0A024R968	PF12424		A0A075B6N1	CL0011		A0A024R2B0	IPR040362
A0A346M022	A0A346M022_HUMAN	ATP6	2	A0A023I7H5		A0A024RAR6	FIS	FIS, isoform CRA_a	1		PF00503	Domain	G-alpha	G-protein alpha subunit	CL0023		CL0532	LIG	This superfamily includes a number of lipid binding families that have a similar topology to the immunoglobulin fold. The family includes The ML domain Pfam:PF02221. It includes the uncharacterised family Pfam:PF06477.	[1]. Structure of the house dust mite allergen Der f 2: implications for function and molecular basis of IgE cross-reactivity. Johannessen BR, Skov LK, Kastrup JS, Kristensen O, Bolwig C, Larsen JN, Spangfort M, Lund K, Gajhede M FEBS Lett. 579, 1208-1212, (2005). PMID: 15710415	[2]. Crystal structure analysis of phosphatidylcholine-GM2-activator product complexes: evidence for hydrolase activity. Wright CS, Mi LZ, Lee S, Rastinejad F Biochemistry. 44, 13510-13521, (2005). PMID: 16216074									IPR018110	Conserved_site	Mandelate racemase/muconate lactonizing enzyme, conserved site				0	A0A024R968	PF13246		A0A075B6N2	CL0011		A0A024R2D7	IPR019340
A0A346M067	A0A346M067_HUMAN	ATP6	2	A0A023I7H5		A0A024RAR8	ARTS-1	Aminopeptidase, 3.4.11.-	2		PF00504	Family	Chloroa_b-bind	Chlorophyll A-B binding protein			CL0533	PRTase-like	This superfamily of phosphoribosyl-transferases (PRTases) and phosphoribosyl-pyrophosphate synthetase-like protein families is characterised by a core fold of three layers, a/b/a with a mixed beta-sheet of six strands. In one of the families consists of two domains of this fold.											IPR018113	Conserved_site	Phosphotransferase system EIIB, cysteine phosphorylation site				0	A0A024R973	PF14778		A0A075B6N3	CL0011		A0A024R2J4	IPR011515
A0A346M083	A0A346M083_HUMAN	ATP6	2	A0A023I7H5		A0A024RAS2	H2AFJ	Histone H2A	2		PF00505	Domain	HMG_box	HMG (high mobility group) box	CL0114		CL0534	YjgF-like	This superfamily is characterised by proteins that form trimers with three closely packed beta-sheets. Some member proteins are chorismate mutases, others are endoribonucleases active on single-stranded mRNA. It is the highly conserved YjgF/YER057c/UK114 protein superfamily. Homologues of this protein occur in eubacteria, archaea, and eukaryotes. Proteins are functionally diverse and are involved…	[1]. Mycobacterium tuberculosis Rv2704 is a member of the YjgF/YER057c/UK114 family. Thakur KG, Praveena T, Gopal B Proteins. 78, 773-778, (2010). PMID: 19899170										IPR018116	Conserved_site	Somatotropin hormone, conserved site				0	A0A024R983	PF05731		A0A075B6N4	CL0011		A0A024R2J4	IPR011516
A0A346M0D0	A0A346M0D0_HUMAN	ATP6	2	A0A023I7H5		A0A024RAT6	FLJ22028	FAD/NAD(P)-binding domain-containing protein	1		PF00506	Family	Flu_NP	Influenza virus nucleoprotein			CL0535	CBM	This clan includes families of two different carbohydrate binding modules, chitin- and cellulase-binders.	[1]. Glycoside hydrolases and glycosyltransferases: families and functional modules. Bourne Y, Henrissat B Curr Opin Struct Biol. 11, 593-600, (2001). PMID: 11785761										IPR018122	Conserved_site	Fork head domain conserved site1				0	A0A024R993	PF07679		A0A075B6P5	CL0011		A0A024R2J4	IPR038889
A0A346M0E5	A0A346M0E5_HUMAN	ATP6	2	A0A023I7H5		A0A024RAV8	BHLHB3	Basic helix-loop-helix domain containing, class B, 3, isoform CRA_a	2		PF00507	Family	Oxidored_q4	NADH-ubiquinone/plastoquinone oxidoreductase, chain 3			CL0536	HEXAPEP	This superfamily is characterised by superhelical turns made up of three short strands duplicated many times; the sequence hexapeptide repeats correspond to individual strands. These hexapeptide repeat regions occur in a range of transferase enzymes.	[1]. Eight bacterial proteins, including UDP-N-acetylglucosamine acyltransferase (LpxA) and three other transferases of Escherichia coli, consist of a six-residue periodicity theme. Vaara M FEMS Microbiol Lett. 76, 249-254, (1992). PMID: 1427014										IPR018124	Conserved_site	Calreticulin/calnexin, conserved site				0	A0A024R993	PF13855		A0A075B6Q5	CL0011		A0A024R2P4	IPR003961
A0A346M0I4	A0A346M0I4_HUMAN	ATP6	2	A0A023I7H5		A0A024RAW0	SURB7	Mediator of RNA polymerase II transcription subunit 21	2		PF00508	Family	PPV_E2_N	E2 (early) protein, N terminal			CL0537	CCCH_zf	This superfamily is characterised by families of proteins with several Cys3His zinc-binding domains in tandem.											IPR018126	Conserved_site	Small acid-soluble spore protein, alpha/beta-type, conserved site				0	A0A024R996	PF00069		A0A075B6R0	CL0011		A0A024R2P4	IPR007657
A0A3G5AUD6	A0A3G5AUD6_HUMAN	ATP6	2	A0A023I7H5		A0A024RAW6	DKFZP779L1558	Coiled-coil domain-containing protein 91	2		PF00509	Family	Hemagglutinin	Haemagglutinin			CL0539	RNase_III	This superfamily is characterised structurally by having a core of 5 helices where one of the helices is surrounded by the others. Many members have the endonuclease catalytic domain.											IPR018130	Conserved_site	Ribosomal protein S2, conserved site				0	A0A024R9B1	PF00494		A0A075B6R2	CL0011		A0A024R2P4	IPR013783
A0A3G5BZL8	A0A3G5BZL8_HUMAN	ATP6	2	A0A023I7H5		A0A024RAW7	MLSTD1	Fatty acyl-CoA reductase, 1.2.1.84	3		PF00510	Family	COX3	Cytochrome c oxidase subunit III			CL0540	GCP	This superfamily carries families of proteins all derived via gene-duplication events that act together in the gamma-tubulin complex. This complex is required for microtubule nucleation at the centrosome.	[1]. GCP5 and GCP6: two new members of the human gamma-tubulin complex. Murphy SM, Preble AM, Patel UK, O'Connell KL, Dias DP, Moritz M, Agard D, Stults JT, Stearns T Mol Biol Cell. 12, 3340-3352, (2001). PMID: 11694571										IPR018134	Conserved_site	Lysosome-associated membrane glycoprotein, conserved site				0	A0A024R9B8	PF04389		A0A075B6R9	CL0011		A0A024R2P4	IPR036116
A0A3G5BZV2	A0A3G5BZV2_HUMAN	ATP6	2	A0A023I7H5		A0A024RAY9	LRMP	Lymphoid-restricted membrane protein, isoform CRA_a	1		PF00511	Domain	PPV_E2_C	E2 (early) protein, C terminal			CL0541	SH2-like	This superfamily is characterised by proteins with the SH2-like fold. The proesence of this domain guides signal-transduction towards the phosphorylated tyrosine residues on its interacting protein-partner.	[1]. Crystal structures of the human p56lck SH2 domain in complex with two short phosphotyrosyl peptides at 1.0 A and 1.8 A resolution. Tong L, Warren TC, King J, Betageri R, Rose J, Jakes S J Mol Biol. 256, 601-610, (1996). PMID: 8604142										IPR018146	Conserved_site	Glyoxalase I, conserved site				0	A0A024R9C0	PF00481		A0A075B6S2	CL0011		A0A024R2Q1	IPR010908
A0A3G5C3H0	A0A3G5C3H0_HUMAN	ATP6	2	A0A023I7H5		A0A024RAZ7	HNRPA1	Heterogeneous nuclear ribonucleoprotein A1, isoform CRA_b	2		PF00512	Domain	HisKA	His Kinase A (phospho-acceptor) domain	CL0025		CL0542	RAS_GEF_N	This is the more N-terminal domain of the RAS-GEF superfamily.											IPR018151	Conserved_site	Transcription elongation factor, GreA/GreB, conserved site				0	A0A024R9G4	PF07159		A0A075B6S4	CL0011		A0A024R2Q1	IPR011012
A0A3G5C665	A0A3G5C665_HUMAN	ATP6	2	A0A023I7H5		A0A024RB03	KIAA0528	KIAA0528, isoform CRA_b	1		PF00513	Family	Late_protein_L2	Late Protein L2			CL0543	Viral_gly_cn_dm	Flavivirus and alpha virus glycoprotein E/E1 consists of three domains. A dimerisation domain, a central domain and an immunoglobulin-like domain. The dimerisation and central domains are intertwined [1-3].	[1]. Molecular organization of a recombinant subviral particle from tick-borne encephalitis virus. Ferlenghi I, Clarke M, Ruttan T, Allison SL, Schalich J, Heinz FX, Harrison SC, Rey FA, Fuller SD Mol Cell. 7, 593-602, (2001). PMID: 11463384	[2]. The Fusion glycoprotein shell of Semliki Forest virus: an icosahedral assembly primed for fusogenic activation at endosomal pH. Lescar J, Roussel A, Wien MW, Navaza J, Fuller SD, Wengler G, Wengler G, Rey FA Cell. 105, 137-148, (2001). PMID: 11301009	[3]. A ligand-binding pocket in the dengue virus envelope glycoprotein. Modis Y, Ogata S, Clements D, Harrison SC Proc Natl Acad Sci U S A. 100, 6986-6991, (2003). PMID: 12759475								IPR018161	Conserved_site	Wnt protein, conserved site				0	A0A024R9H2	PF01042		A0A075B6S5	CL0011		A0A024R2Q1	IPR043546
A0A3G5CB78	A0A3G5CB78_HUMAN	ATP6	2	A0A023I7H5		A0A024RB16	FAM62A	Family with sequence similarity 62 (C2 domain containing), member A, isoform CRA_a	2		PF00514	Repeat	Arm	Armadillo/beta-catenin-like repeat	CL0020		CL0544	AcylCoA_ox_dh_N	Acyl-CoA dehydrogenases and acyl-coenzyme A oxidases consist of three domains. An N-terminal all alpha domain, a beta-barrel middle domain and a C-terminal catalytic domain [1-2].	[1]. Crystal structures of medium-chain acyl-CoA dehydrogenase from pig liver mitochondria with and without substrate. Kim JJ, Wang M, Paschke R Proc Natl Acad Sci U S A 90, 7523-7527, (1993). PMID: 8356049	[2]. Acyl-CoA oxidase 1 from Arabidopsis thaliana. Structure of a key enzyme in plant lipid metabolism. Pedersen L, Henriksen A J Mol Biol. 345, 487-500, (2005). PMID: 15581893									IPR018166	Conserved_site	S-adenosylmethionine decarboxylase, conserved site				0	A0A024R9I1	PF05281		A0A075B6S6	CL0011		A0A024R2Q3	IPR000225
A0A3G5CCE6	A0A3G5CCE6_HUMAN	ATP6	2	A0A023I7H5		A0A024RB35	C1QDC1	C1q domain containing 1, isoform CRA_g	2		PF00515	Repeat	TPR_1	Tetratricopeptide repeat	CL0020		CL0545	APCOP-app_sub	This superfamily is characterised by subdomains from the clathrin and coatomer appendages. The superfamily possesses a single protein/protein interaction site that in yeast binds to the ARFGAP Glo3p, and in mammalian gamma-COP binds to a Glo3p orthologue, ARFGAP2 [1].	[1]. Gamma-COP appendage domain - structure and function. Watson PJ, Frigerio G, Collins BM, Duden R, Owen DJ Traffic. 5, 79-88, (2004). PMID: 14690497										IPR018168	Conserved_site	Ubiquinone biosynthesis hydroxylase, UbiH/UbiF/VisC/COQ6, conserved site				0	A0A024R9I8	PF09764		A0A075B6S9	CL0011		A0A024R2Q3	IPR011989
A0A3G5CDK8	A0A3G5CDK8_HUMAN	ATP6	2	A0A023I7H5		A0A024RB39	LOC56901	NADH:ubiquinone oxidoreductase MLRQ subunit homolog, isoform CRA_a	1		PF00516	Family	GP120	Envelope glycoprotein GP120			CL0546	Hexosaminidase	This superfamily is characterised by a mixed beta sheet with connection over the free side of the sheet. The fold is like a zincin fold lacking the catalytic centre.	[1]. Crystal structures of Geobacillus stearothermophilus alpha-glucuronidase complexed with its substrate and products: mechanistic implications. Golan G, Shallom D, Teplitsky A, Zaide G, Shulami S, Baasov T, Stojanoff V, Thompson A, Shoham Y, Shoham G J Biol Chem. 279, 3014-3024, (2004). PMID: 14573597										IPR018170	Conserved_site	Aldo/keto reductase, conserved site				0	A0A024R9I9	PF14992		A0A075B6T6	CL0011		A0A024R2Q3	IPR013284
A0A3G5CEC5	A0A3G5CEC5_HUMAN	ATP6	2	A0A023I7H5		A0A024RB48	TENC1	Tensin like C1 domain containing phosphatase (Tensin 2), isoform CRA_a	1		PF00517	Family	GP41	Retroviral envelope protein			CL0547	GF_recep_C-rich	The cysteine-rich regions of growth factor receptor tyrosine kinases consist of eight disulphide-linked modules [1].	[1]. Crystal structure of the first three domains of the type-1 insulin-like growth factor receptor. Garrett TP, McKern NM, Lou M, Frenkel MJ, Bentley JD, Lovrecz GO, Elleman TC, Cosgrove LJ, Ward CW Nature 394, 395-399, (1998). PMID: 9690478										IPR018171	Conserved_site	Peptidyl-tRNA hydrolase, conserved site				0	A0A024R9J4	PF00007		A0A075B6T7	CL0011		A0A024R2Q3	IPR016024
A0A3G9I8L5	A0A3G9I8L5_HUMAN	ATP6	2	A0A023I7H5		A0A024RB55	CENTG1	Centaurin, gamma 1, isoform CRA_b	2		PF00518	Family	E6	Early Protein (E6)			CL0548	IHF-likeDNA-bdg	This superfamily is characterised by being a dimer of identical subunits of a core of four helices in a bundle, partly opened, capped with a beta-sheet. All members appear to be prokaryotic DNA-binding domains.											IPR018176	Conserved_site	Tryptophanase, conserved site				0	A0A024R9J4	PF00093		A0A075B6T8	CL0011		A0A024R2R3	IPR004299
A0A3G9IUV3	A0A3G9IUV3_HUMAN	ATP6	2	A0A023I7H5		A0A024RB56	ZNF385	Zinc finger protein 385, isoform CRA_b	1		PF00519	Domain	PPV_E1_C	Papillomavirus helicase	CL0023		CL0550	SRCR	[1]. The structure of the extracellular region of human hepsin reveals a serine protease domain and a novel scavenger receptor cysteine-rich (SRCR) domain. Somoza JR, Ho JD, Luong C, Ghate M, Sprengeler PA, Mortara K, Shrader WD, Sperandio D, Chan H, McGrath ME, Katz BA Structure. 11, 1123-1131, (2003). PMID: 12962630											IPR018181	Conserved_site	Heat shock protein 70, conserved site				0	A0A024R9J4	PF00219		A0A075B6U4	CL0011		A0A024R2R9	IPR027986
A0A3G9IWP6	A0A3G9IWP6_HUMAN	ATP6	2	A0A023I7H5		A0A024RB57	FAM112B	Family with sequence similarity 112, member B, isoform CRA_a	1		PF00520	Family	Ion_trans	Ion transport protein	CL0030		CL0551	BCLiA	This superfamily is characterised by families of proteins that inhibit apoptosis, They are regulated by all BH3-only proteins to promote apoptosis.	[1]. BCL-2 gene family and the regulation of programmed cell death. Korsmeyer SJ (). PMID: 10197582	[2]. The BCL-2 protein family: opposing activities that mediate cell death. Youle RJ, Strasser A Nat Rev Mol Cell Biol. 9, 47-59, (2008). PMID: 18097445									IPR018184	Conserved_site	Integrin alpha chain, C-terminal cytoplasmic region, conserved site				0	A0A024R9J4	PF19035		A0A075B6U6	CL0011		A0A024R2R9	IPR028031
A0A3Q8A110	A0A3Q8A110_HUMAN	ATP6	2	A0A023I7H5		A0A024RB76	C12orf31	Protein LLP homolog, Protein LAPS18-like	2		PF00521	Family	DNA_topoisoIV	DNA gyrase/topoisomerase IV, subunit A			CL0552	Hect	This superfamily is characterised by fmailies with E3-ligase catalytic acitvity. The fold consists of two alpha+beta domains; where the N-terminal domain is an array of helices and beta-hairpins; the C-terminal domain is an a/b sandwich with one left-handed beta-alpha(n)-beta unit.	[1]. A novel UbcH10-binding protein facilitates the ubiquitinylation of cyclin B in vitro. Kobirumaki F, Miyauchi Y, Fukami K, Tanaka H J Biochem. 137, 133-139, (2005). PMID: 15749827										IPR018186	Conserved_site	Transcription factor, T-box, conserved site				0	A0A024R9J6	PF11789		A0A075B6V5	CL0011		A0A024R2S0	IPR007632
A0A3Q8QZL4	A0A3Q8QZL4_HUMAN	ATP6	2	A0A023I7H5		A0A024RB89	OBFC2B	Oligonucleotide/oligosaccharide-binding fold containing 2B, isoform CRA_b	2		PF00522	Family	VPR	VPR/VPX protein			CL0556	PapD-like	This superfamily is characterised by proteins in families involved in ciliary or flagellar function. The families may be acting as chaperones.											IPR018189	Conserved_site	Phosphoglucose isomerase, conserved site				0	A0A024R9J7	PF09724		A0A075B6W5	CL0011		A0A024R2S8	IPR026910
A0A3Q8R0B3	A0A3Q8R0B3_HUMAN	ATP6	2	A0A023I7H5		A0A024RBA2	MARS	Methionyl-tRNA synthetase	1		PF00523	Family	Fusion_gly	Fusion glycoprotein F0	CL0595		CL0559	CBD9-like	This superfamily is characterised by having seven beta strands in 2 sheets in the form of a Greek-key, with an additional strand at the N-terminus. The binding region is defined by a hydrophobic pocket created between the folds.	[1]. The Anabaena sensory rhodopsin transducer defines a novel superfamily of prokaryotic small-molecule binding domains. De Souza RF, Iyer LM, Aravind L (). PMID: 19682383	[2]. Cytochromes b561: ascorbate-mediated trans-membrane electron transport. Asard H, Barbaro R, Trost P, Berczi A (). PMID: 23249217									IPR018192	Conserved_site	Ribosomal protein S5, N-terminal, conserved site				0	A0A024R9K7	PF09430		A0A075B6X5	CL0011		A0A024R2T8	IPR001604
A0A3Q9CRH1	A0A3Q9CRH1_HUMAN	ATP6	2	A0A023I7H5		A0A024RBC0	KITLG	Kit ligand, c-Kit ligand	5		PF00524	Family	PPV_E1_N	E1 Protein, N terminal domain			CL0560	Chalcone-like	This superfamily is characterised by a fold that is conserved across plants, bacteria and fungi. However, possible key residues necessary for binding naringenin, 4',5,7-trihydroxyflavanone, are not conserved beyond plants.	[1]. Chalcone isomerase family and fold: no longer unique to plants. Gensheimer M, Mushegian A Protein Sci. 13, 540-544, (2004). PMID: 14718655										IPR018198	Conserved_site	ATP phosphoribosyltransferase, conserved site				0	A0A024R9M5	PF15003		A0A075B734	CL0716		A0A024R2T8	IPR020821
A0A3Q9CSM1	A0A3Q9CSM1_HUMAN	ATP6	2	A0A023I7H5		A0A024RBC3	DSPG3	Dermatan sulfate proteoglycan 3, isoform CRA_a	2		PF00525	Family	Crystallin	Alpha crystallin A chain, N terminal			CL0561	LisH	Members of this clan include the LisH dimerisation/tetramerisation domains and the FOP N terminal dimerisation domain.	[1]. Structure of the N-terminal domain of the FOP (FGFR1OP) protein and implications for its dimerization and centrosomal localization. Mikolajka A, Yan X, Popowicz GM, Smialowski P, Nigg EA, Holak TA J Mol Biol. 359, 863-875, (2006). PMID: 16690081	[2]. Structural basis for the assembly of the SMRT/NCoR core transcriptional repression machinery. Oberoi J, Fairall L, Watson PJ, Yang JC, Czimmerer Z, Kampmann T, Goult BT, Greenwood JA, Gooch JT, Kallenberger BC, Nagy L, Neuhaus D, Schwabe JW Nat Struct Mol Biol. 18, 177-184, (2011). PMID: 21240272									IPR018199	Conserved_site	Ribosomal protein S4e, N-terminal, conserved site				0	A0A024R9M8	PF07690		A0A075B759	CL0475		A0A024R2T8	IPR040255
A0A3Q9CT10	A0A3Q9CT10_HUMAN	ATP6	2	A0A023I7H5		A0A024RBC7	ATP2B1	Calcium-transporting ATPase, 7.2.2.10	5		PF00526	Repeat	Dicty_CTDC	Dictyostelium (slime mold) repeat			CL0562	Holin-V	This superfamily is characterised by three-pass transmembrane proteins from Hol44 and Hol118 families of holins.											IPR018200	Conserved_site	Ubiquitin specific protease, conserved site				0	A0A024R9M9	PF13499		A0A075B767	CL0475		A0A024R2T8	IPR044925
A0A3S8PNN9	A0A3S8PNN9_HUMAN	ATP6	2	A0A023I7H5		A0A024RBD4	CCDC41	Coiled-coil domain containing 41, isoform CRA_b	1		PF00527	Family	E7	E7 protein, Early protein			CL0563	Holin-II	This superfamily is characterised by phage holins of one or two transmembrane domains. It includes the P21 Holin S, the T7 Holin, the HP1 Holin and the Pseudomonas phage F116 Holin families.											IPR018206	Conserved_site	Electron transfer flavoprotein subunit alpha, conserved site				0	A0A024R9N3	PF06417		A0A075B7B6	CL0011		A0A024R2T8	IPR044929
A0A3S8V7R9	A0A3S8V7R9_HUMAN	ATP6	2	A0A023I7H5		A0A024RBF3	GOLGA2L1	Golgi autoantigen, golgin subfamily a, 2-like 1, isoform CRA_a	1		PF00528	Family	BPD_transp_1	Binding-protein-dependent transport system inner membrane component	CL0404		CL0564	Holin-III	This superfamily is characterised by one to three-pass transmembrane proteins from Lambda S, P2, LydA, P35, Hol, Holin-X, D/T-Hol holin families.											IPR018207	Conserved_site	Haem oxygenase conserved site				0	A0A024R9P5	PF13925		A0A075B7B8	CL0011		A0A024R2U8	IPR023260
A0A3S8V7Y8	A0A3S8V7Y8_HUMAN	ATP6	2	A0A023I7H5		A0A024RBF9	FLJ11259	DNA damage-regulated autophagy modulator protein 1	1		PF00529	Family	CusB_dom_1	Cation efflux system protein CusB domain 1	CL0105		CL0566	Tubulin	The characteristic families of this clan are the tubulin GTPase domain and the alpha and beta tubulin subunits. A segmental duplication early on in the primate lineage has led to the creation of up to three tubulin-like domains in the higher primates. The most N-terminal one is the Misato domain, which probably represents the original domain [3].	[1]. Tubulin and FtsZ form a distinct family of GTPases. Nogales E, Downing KH, Amos LA, Lowe J Nat Struct Biol 5, 451-458, (1998). PMID: 9628483	[2]. Tubulin and its prokaryotic homologue FtsZ: a structural and functional comparison. Dyer N Sci Prog. 92, 113-137, (2009). PMID: 19697711	[3]. An anthropoid-specific segmental duplication on human chromosome 1q22. Kuryshev VY, Vorobyov E, Zink D, Schmitz J, Rozhdestvensky TS, Munstermann E, Ernst U, Wellenreuther R, Moosmayer P, Bechtel S, Schupp I, Horst J, Korn B, Poustka A, Wiemann S Genomics. 88, 143-151, (2006). PMID: 16545939								IPR018211	Conserved_site	Alcohol dehydrogenase, iron-type, conserved site				0	A0A024R9Q8	PF09270		A0A075B7D0	CL0011		A0A024R2U8	IPR031972
A0A3S9JI74	A0A3S9JI74_HUMAN	ATP6	2	A0A023I7H5		A0A024RBG0	C12orf48	PCNA-interacting partner, PARP-1 binding protein, PARP1-binding protein	2		PF00530	Domain	SRCR	Scavenger receptor cysteine-rich domain	CL0550		CL0567	Phage_TACs	This superfamily is characterised by only distantly related families of tail assembly chaperones or TACs. Most bacteriophages possess a long tail that is either contractile as in the Siphoviridae family or contractile as in the Myoviridae family. TACs are required for the morphogenesis of all long-tailed phages. All the studied TACs form spiral quaternary rings that have arisen through diverging …	[1]. The phage lambda major tail protein structure reveals a common evolution for long-tailed phages and the type VI bacterial secretion system. Pell LG, Kanelis V, Donaldson LW, Howell PL, Davidson AR Proc Natl Acad Sci U S A. 106, 4160-4165, (2009). PMID: 19251647	[2]. A conserved spiral structure for highly diverged phage tail assembly chaperones. Pell LG, Cumby N, Clark TE, Tuite A, Battaile KP, Edwards AM, Chirgadze NY, Davidson AR, Maxwell KL J Mol Biol. 425, 2436-2449, (2013). PMID: 23542344									IPR018212	Conserved_site	Sodium/solute symporter, conserved site				0	A0A024R9Q8	PF09271		A0A075B7D4	CL0011		A0A024R2X2	IPR005522
A0A410P8U3	A0A410P8U3_HUMAN	ATP6	2	A0A023I7H5		A0A024RBG1	NUDT4B	Diphosphoinositol polyphosphate phosphohydrolase NUDT4B, DIPP-2B, 3.6.1.52, Nucleoside diphosphate-linked moiety X motif 4B, Nudix motif 4B, Nudix hydrolase 4B	4		PF00531	Domain	Death	Death domain	CL0041		CL0568	Man_lectin	This familu of lectins has a beta-prism fold [1-2].	[1]. Crystal structure of the jacalin-T-antigen complex and a comparative study of lectin-T-antigen complexes. Jeyaprakash AA, Geetha Rani P, Banuprakash Reddy G, Banumathi S, Betzel C, Sekar K, Surolia A, Vijayan M J Mol Biol. 321, 637-645, (2002). PMID: 12206779	[2]. Vibrio cholerae cytolysin recognizes the heptasaccharide core of complex N-glycans with nanomolar affinity. Levan S, De S, Olson R J Mol Biol. 425, 944-957, (2013). PMID: 23274141									IPR018214	Conserved_site	Glutamyl-tRNA reductase, conserved site				0	A0A024R9Q8	PF20144		A0A075B7D8	CL0011		A0A024R2X2	IPR038286
A0A410REX3	A0A410REX3_HUMAN	ATP6	2	A0A023I7H5		A0A024RBH0	PCTK2	PCTAIRE protein kinase 2, isoform CRA_a	1		PF00532	Domain	Peripla_BP_1	Periplasmic binding proteins and sugar binding domain of LacI family	CL0144		CL0569	Phage_TTPs	This superfamily represents families of phage tail tube proteins TTPs. Most bacteriophages possess a long tail that is either non-contractile as in the Siphoviridae family or contractile as in the Myoviridae family. These multi-component structures are assembled in regulated pathways that commence with the formation of the tail tip. Tail tip complexes, also referred to as baseplates in some phage…	[1]. The phage lambda major tail protein structure reveals a common evolution for long-tailed phages and the type VI bacterial secretion system. Pell LG, Kanelis V, Donaldson LW, Howell PL, Davidson AR Proc Natl Acad Sci U S A. 106, 4160-4165, (2009). PMID: 19251647	[2]. Tail tip proteins related to bacteriophage lambda gpL coordinate an iron-sulfur cluster. Tam W, Pell LG, Bona D, Tsai A, Dai XX, Edwards AM, Hendrix RW, Maxwell KL, Davidson AR J Mol Biol. 425, 2450-2462, (2013). PMID: 23542343	[3]. A conserved spiral structure for highly diverged phage tail assembly chaperones. Pell LG, Cumby N, Clark TE, Tuite A, Battaile KP, Edwards AM, Chirgadze NY, Davidson AR, Maxwell KL J Mol Biol. 425, 2436-2449, (2013). PMID: 23542344								IPR018216	Conserved_site	Cathelicidin, conserved site				0	A0A024R9R5	PF00400		A0A075B7E8	CL0011		A0A024R328	IPR000008
A0A410REX6	A0A410REX6_HUMAN	ATP6	2	A0A023I7H5		A0A024RBI3	NIFUN	NifU-like N-terminal domain containing, isoform CRA_c	1		PF00533	Family	BRCT	BRCA1 C Terminus (BRCT) domain	CL0459		CL0570	PPP-I	This superfamily is characterised by families of short N-terminal domains such as the pancreatic carboxypeptidase activation domain, the subtilase propeptides/inhibitors, the prohormone convertase 1 pro-domain, and the peptidase- S8 pro-domain. All families exbhibit an alpha+beta sandwich with antiparallel beta-sheets in a (beta-alpha-beta)x2 conformation.											IPR018219	Conserved_site	Thiol peroxidase conserved site				0	A0A024R9R7	PF00176		A0A075B7F0	CL0011		A0A024R328	IPR000719
A0A410RF61	A0A410RF61_HUMAN	ATP6	2	A0A023I7H5		A0A024RBK0	C12orf47	Chromosome 12 open reading frame 47, isoform CRA_a	1		PF00534	Family	Glycos_transf_1	Glycosyl transferases group 1	CL0113		CL0571	30K_movement	The 30K superfamily comprises several large families of viral movement proteins which include Pfam families: 3A, MP, Bromo_MP, TBSV_P22, Tenui_NS4, Gemini_BL1, and Emaravirus_P4. They are all related to the 30 kDa ('30K') movement protein of tobacco mosaic virus [1].	[1]. The '30K' superfamily of viral movement proteins. Melcher U J Gen Virol. 81, 257-266, (2000). PMID: 10640565										IPR018223	Conserved_site	Argininosuccinate synthase, conserved site				0	A0A024R9R7	PF00271		A0A075B7F1	CL0011		A0A024R328	IPR000961
A0A411II56	A0A411II56_HUMAN	ATP6	2	A0A023I7H5		A0A024RBL1	C12orf52	RBPJ-interacting and tubulin-associated protein 1, RBPJ-interacting and tubulin-associated protein	3		PF00535	Family	Glycos_transf_2	Glycosyl transferase family 2	CL0110		CL0572	TIKI	TIKI superfamily proteins carry a core fold contributing to the enzymic activity, that ranges from metalloprotease, erythromycin esterase and bacterial toinosis as in the MARTX and dermonecrotic toxin families, amongst others. All superfamily members carry the active site residues of two histidines and two glutamates [1]. Tiki proteins themselves antagonize Wnt activity upstream of its receptor.	[1]. Tiki, at the head of a new superfamily of enzymes. Sanchez-Pulido L, Ponting CP Bioinformatics. 29, 2371-2374, (2013). PMID: 23868957										IPR018224	Conserved_site	Ependymin, conserved site				0	A0A024R9R7	PF13892		A0A076N230	CL0410		A0A024R328	IPR002219
A0A411IJF3	A0A411IJF3_HUMAN	ATP6	2	A0A023I7H5		A0A024RBL7	MTERFD3	mTERF domain containing 3, isoform CRA_a	1		PF00536	Domain	SAM_1	SAM domain (Sterile alpha motif)	CL0003		CL0573	KA1-like	This superfamily is characterised by small adenylate-sensing domains at the C-terminus of molecules such as AMP-Activated Protein Kinases an SNF1-like protein kinases [1].	[1]. Kinase associated-1 domains drive MARK/PAR1 kinases to membrane targets by binding acidic phospholipids. Moravcevic K, Mendrola JM, Schmitz KR, Wang YH, Slochower D, Janmey PA, Lemmon MA Cell. 143, 966-977, (2010). PMID: 21145462										IPR018226	Conserved_site	Barwin, conserved site				0	A0A024R9S6	PF05346		A0A076N2Z3	CL0011		A0A024R328	IPR008271
A0A481Y928	A0A481Y928_HUMAN	ATP6	2	A0A023I7H5		A0A024RBM1	FLJ20674	Ig-like domain-containing protein	2		PF00537	Domain	Toxin_3	Scorpion toxin-like domain	CL0054		CL0575	EFTPs	This superfamily is characterised ba a barrel that is formed as a greek-key. It is found as the second domain in many elongation factor proteins, as well as in an elaborated from in two ribosomal proteins and in some other N-terminal domains, eg of AlaX and Gar1 and RimM protein famlies.											IPR018228	Conserved_site	Deoxyribonuclease, TatD-related, conserved site				0	A0A024R9S7	PF01433		A0A076N2Z3	CL0343		A0A024R328	IPR011009
A0A482JXE7	A0A482JXE7_HUMAN	ATP6	2	A0A023I7H5		A0A024RBM2	TMEM118	Transmembrane protein 118, isoform CRA_b	1		PF00538	Domain	Linker_histone	linker histone H1 and H5 family	CL0123		CL0576	STARBD	This is a superfamily of starch-binding domains thta are distinct from the CBM, carbohydrate-binding superfamily. STARBD ares characterised by a beta-sandwich arranged as a greek key, of seven betA-strands in two sheets, with some members having additionlly one or two strands.											IPR018230	Conserved_site	BUD31/G10-related, conserved site				0	A0A024R9S7	PF09127		A0A076VEF9	CL0343		A0A024R328	IPR014376
A0A4D5ZD68	A0A4D5ZD68_HUMAN	ATP6	2	A0A023I7H5		A0A024RBM8	HYPE	Protein adenylyltransferase FICD, 2.7.7.108, AMPylator FICD, FIC domain-containing protein	3		PF00539	Family	Tat	Transactivating regulatory protein (Tat)			CL0577	Paramyxovirin_C	C proteins of the Paramyxovirinae families are one of several genes transcribed from overlapping frames of the phosphoprotein (P) gene. The C proteins cluster in three groups, which are made up of measles, Nipah, and Sendai viruses. All C proteins have a similar organisation which consists of a variable, disordered N-terminus and a conserved, alpha-helical C-terminus [1].	[1]. Evolution and structural organization of the C proteins of paramyxovirinae. Lo MK, Sogaard TM, Karlin DG (). PMID: 24587180										IPR018232	Conserved_site	Glycoside hydrolase, family 37, conserved site				0	A0A024R9U4	PF11027		A0A080YUZ5	CL0037		A0A024R328	IPR017441
A0A4D6CM06	A0A4D6CM06_HUMAN	ATP6	2	A0A023I7H5		A0A024RBN3	C12orf34	Chromosome 12 open reading frame 34, isoform CRA_a	1		PF00540	Domain	Gag_p17	gag gene protein p17 (matrix protein)	CL0074		CL0578	AbiEI	AbiEI is a famaily of bacterial toxins that are both the cognate antitoxins of the bacterial toxin-antitoxin system of type IV and part of the innate immunity system against phage infection. Bacterial abortive infection (Abi) systems are the apoptosis sytems of bacteria that ensue after phage infection to prevent further viral replication. This superfamily of antitoxins are derived from the ortho…	[1]. A widespread bacteriophage abortive infection system functions through a Type IV toxin-antitoxin mechanism. Dy RL, Przybilski R, Semeijn K, Salmond GP, Fineran PC Nucleic Acids Res. 42, 4590-4605, (2014). PMID: 24465005										IPR018233	Conserved_site	Calsequestrin, conserved site				0	A0A024R9U9	PF10273		A0A080YUZ6	CL0037		A0A024R328	IPR017892
A0A4D6CPA9	A0A4D6CPA9_HUMAN	ATP6	2	A0A023I7H5		A0A024RBP7	UNQ1887	Signal peptide peptidase 3, isoform CRA_b	1		PF00541	Domain	Adeno_knob	Adenoviral fibre protein (knob domain)	CL0326		CL0580	YqgF	This clain contains the bacterial YqgF family [1-2] and homologous domains in bacterial Tex proteins [3], involved in transcriptional processes, and eukaryotic transcription elongation factor SPT6 [4-5].	[1]. Solution structure of the hypothetical protein YqgF from Escherichia coli reveals an RNAse H fold. Liu D, Wang YS, Wyss DF J Biomol NMR. 27, 389-392, (2003). PMID: 14512736	[2]. Holliday junction resolvases and related nucleases: identification of new families, phyletic distribution and evolutionary trajectories. Aravind L, Makarova KS, Koonin EV Nucleic Acids Res. 28, 3417-3432, (2000). PMID: 10982859	[3]. Crystal structure and RNA binding of the Tex protein from Pseudomonas aeruginosa. Johnson SJ, Close D, Robinson H, Vallet-Gely I, Dove SL, Hill CP J Mol Biol. 377, 1460-1473, (2008). PMID: 18321528	[4]. Structure and biological importance of the Spn1-Spt6 interaction, and its regulatory role in nucleosome binding. McDonald SM, Close D, Xin H, Formosa T, Hill CP Mol Cell. 40, 725-735, (2010). PMID: 21094070	[5]. Crystal structures of the S. cerevisiae Spt6 core and C-terminal tandem SH2 domain. Close D, Johnson SJ, Sdano MA, McDonald SM, Robinson H, Formosa T, Hill CP J Mol Biol. 408, 697-713, (2011). PMID: 21419780						IPR018234	Conserved_site	GTP cyclohydrolase I, conserved site				0	A0A024R9V3	PF08238		A0A080YUZ7	CL0037		A0A024R328	IPR020454
A0A4D6CQ23	A0A4D6CQ23_HUMAN	ATP6	2	A0A023I7H5		A0A024RBQ8	C12orf49	SREBP regulating gene protein	1		PF00542	Domain	Ribosomal_L12	Ribosomal protein L7/L12 C-terminal domain			CL0582	TrkA_C	This superfamily is characterised by families that form part of voltage-gated ion channels found in a wide range of bacteria, archaea, eukaryotes and viruses.											IPR018235	Conserved_site	Bacterial luciferase, conserved site				0	A0A024R9W1	PF02513		A0A080YUZ8	CL0037		A0A024R328	IPR027436
A0A4D6CQV0	A0A4D6CQV0_HUMAN	ATP6	2	A0A023I7H5		A0A024RBR1	RSN	Restin (Reed-Steinberg cell-expressed intermediate filament-associated protein), isoform CRA_b	1		PF00543	Domain	P-II	Nitrogen regulatory protein P-II	CL0089		CL0584	FF	This superfamily contains FF domains.	[1]. The FF domain: a novel motif that often accompanies WW domains. Bedford MT, Leder P Trends Biochem Sci 24, 264-265, (1999). PMID: 10390614										IPR018236	Conserved_site	SAICAR synthetase, conserved site				0	A0A024R9W3	PF00076		A0A080YUZ9	CL0037		A0A024R328	IPR034667
A0A4D6CR66	A0A4D6CR66_HUMAN	ATP6	2	A0A023I7H5		A0A024RBS1	GCN1L1	GCN1 general control of amino-acid synthesis 1-like 1 (Yeast), isoform CRA_b	1		PF00544	Repeat	Pectate_lyase_4	Pectate lyase	CL0268		CL0585	Nucleoporin_A	This is a superfamily of nucleoporins. Nucleoporins are all-beta structures that form part of the nuclear-pore complex.	[1]. Structural and functional analysis of Nup133 domains reveals modular building blocks of the nuclear pore complex. Berke IC, Boehmer T, Blobel G, Schwartz TU J Cell Biol. 167, 591-597, (2004). PMID: 15557116										IPR018237	Conserved_site	Myelin proteolipid protein PLP, conserved site				0	A0A024R9Y2	PF15275		A0A080YV01	CL0037		A0A024R328	IPR035892
A0A4D6CRN8	A0A4D6CRN8_HUMAN	ATP6	2	A0A023I7H5		A0A024RBT0	WDR66	WD repeat domain 66, isoform CRA_a	1		PF00545	Domain	Ribonuclease	ribonuclease			CL0586	CTC1	This clan contains CST telomere maintenance proteins.											IPR018238	Conserved_site	Glycoside hydrolase, family 14, conserved site				0	A0A024R9Y9	PF02513		A0A087WSX0	CL0011		A0A024R328	IPR046349
A0A4D6CVD1	A0A4D6CVD1_HUMAN	ATP6	2	A0A023I7H5		A0A024RBT3	FLJ14466	Calcium release-activated calcium channel protein 1	3		PF00547	Domain	Urease_gamma	Urease, gamma subunit			CL0587	STAND_N	This superfamily is characterised by proteins from various fungal STAND proteins [1].	[1]. Genesis of a fungal non-self recognition repertoire. Paoletti M, Saupe SJ, Clave C (). PMID: 17356694	[2]. Genesis of a fungal non-self recognition repertoire. Paoletti M, Saupe SJ, Clave C (). PMID: 17356694	[3]. Genomic clustering and homology between HET-S and the NWD2 STAND protein in various fungal genomes. Daskalov A, Paoletti M, Ness F, Saupe SJ (). PMID: 22493719								IPR018240	Conserved_site	Clathrin adaptor, mu subunit, conserved site				0	A0A024RA08	PF15027		A0A087WSY4	CL0011		A0A024R330	IPR028006
A0A4D6FHE3	A0A4D6FHE3_HUMAN	ATP6	2	A0A023I7H5		A0A024RBU2	U1SNRNPBP	U11/U12 small nuclear ribonucleoprotein 35 kDa protein, U1 snRNP-binding protein homolog	2		PF00548	Family	Peptidase_C3	3C cysteine protease (picornain 3C)	CL0124		CL0588	Ribos_L15p_L18e	This superfamily is characterised by ribisomol proteins from varied phyla and cellular organelles.											IPR018241	Conserved_site	Anion exchange, conserved site				0	A0A024RA24	PF17034		A0A087WSY6	CL0011		A0A024R332	IPR008501
A0A4Y6A363	A0A4Y6A363_HUMAN	ATP6	2	A0A023I7H5		A0A024RBX2	FAM51A1	Family with sequence similarity 51, member A1, isoform CRA_a	1		PF00549	Domain	Ligase_CoA	CoA-ligase	CL0506		CL0589	KIX_like	This superfamily is characterised by structures with three helices in a partly opened bundle bundle. There are both creb-binding proteins and activator-binding proteins on mediator subunits, such as higher eukaryotic 13 and fungal 15.											IPR018244	Conserved_site	Allergen V5/Tpx-1-related, conserved site				0	A0A024RA25	PF00595		A0A087WSZ0	CL0011		A0A024R333	IPR001680
A0A4Y6A3G4	A0A4Y6A3G4_HUMAN	ATP6	2	A0A023I7H5		A0A024RC03	GPR64	G protein-coupled receptor 64, isoform CRA_a	1		PF00550	Domain	PP-binding	Phosphopantetheine attachment site	CL0314		CL0590	OML_zippers	This is a superfamily of short outer membrane lipoporteins that are coiled-coils of alpha-helices. The families included are both leucine and alanine zippers. A zipper motif is a heptad or seven-residue repeat, represented by X..X...X..X...X..X...X..X...X..X, etc, where the X is hydrophobic residue, usually a leucine or alanine, and the intermediate residues are largely polar or hydrophilic; that…	[1]. Insights on the structure and stability of Licanantase: a trimeric acid-stable coiled-coil lipoprotein from Acidithiobacillus thiooxidans. Abarca F, Gutierrez-Maldonado SE, Parada P, Martinez P, Maass A, Perez-Acle T (). PMID: 25165619										IPR018245	Conserved_site	Gonadotropin, beta subunit, conserved site				0	A0A024RA25	PF00625		A0A087WSZ9	CL0011		A0A024R333	IPR015943
A0A4Y6A3M9	A0A4Y6A3M9_HUMAN	ATP6	2	A0A023I7H5		A0A024RC31	KIAA1012	KIAA1012, isoform CRA_b	1		PF00551	Domain	Formyl_trans_N	Formyl transferase			CL0591	TKC_like	This superfamily is coposed of three branches that include the true C-terminal domains of transketolases, the C-terminal domain of the beta-subunit of branched-chain alpha-keto acid dehydrogenase, and domain II of pyruvate-ferredoxin oxidoreductase, PFOR, family.											IPR018251	Conserved_site	Crustacean neurohormone, conserved site				0	A0A024RA25	PF02828		A0A087WT01	CL0011		A0A024R333	IPR020472
A0A4Y6A423	A0A4Y6A423_HUMAN	ATP6	2	A0A023I7H5		A0A024RC37	P15RS	Regulation of nuclear pre-mRNA domain-containing protein	2		PF00552	Domain	IN_DBD_C	Integrase DNA binding domain	CL0010		CL0592	beta_Roll	This superfamily is characterised by families of a short nonarepeat unit. The beta-roll is made up of a super-helix of beta-strand-turns of two short strands each, and the loops are stabilised by Ca2+ ions. The region of a protein with this beta-roll is often termed the R-module, and it can frequently be found in metalloproteases of the serralysin type and in epimerases [1]. The nonarepeat is als…	[1]. NMR structure of the R-module: a parallel beta-roll subunit from an Azotobacter vinelandii mannuronan C-5 epimerase. Aachmann FL, Svanem BI, Guntert P, Petersen SB, Valla S, Wimmer R J Biol Chem. 281, 7350-7356, (2006). PMID: 16407237										IPR018252	Conserved_site	Annexin repeat, conserved site				0	A0A024RA25	PF07653		A0A087WT02	CL0011		A0A024R333	IPR036322
A0A4Y6A4K8	A0A4Y6A4K8_HUMAN	ATP6	2	A0A023I7H5		A0A024RC42	CDH2	Cadherin 2, type 1, N-cadherin (Neuronal), isoform CRA_b	5		PF00553	Domain	CBM_2	Cellulose binding domain	CL0203		CL0593	G5	This superfamily is characterised by repeating domains, G5 and SasG-E, where the SasG-E domain is a truncated form of the G5 domain. Member domains are composed of triple-stranded single-layer beta-sheets connected by an intertwined motif, which leads to a strand switch [1]. These domain-members occur on extracellular proteins which, in Staphylococcus spp, form biofilms.	[1]. Staphylococcal biofilm-forming protein has a contiguous rod-like structure. Gruszka DT, Wojdyla JA, Bingham RJ, Turkenburg JP, Manfield IW, Steward A, Leech AP, Geoghegan JA, Foster TJ, Clarke J, Potts JR (). PMID: 22493247										IPR018253	Conserved_site	DnaJ domain, conserved site				0	A0A024RA36	PF09794		A0A087WT03	CL0011		A0A024R333	IPR037867
A0A5B9R0V0	A0A5B9R0V0_HUMAN	ATP6	2	A0A023I7H5		A0A024RC51	SCAND2	SCAN domain containing 2, isoform CRA_a	1		PF00554	Domain	RHD_DNA_bind	Rel homology DNA-binding domain	CL0073		CL0594	DUF1735	This superfamily includes a number of families that are related to the domain of unknown function DUF1735. These proteins have a beta-sandwich fold.											IPR018254	Conserved_site	Ribosomal protein L29, conserved site				0	A0A024RA57	PF14753		A0A087WT10	CL0012		A0A024R355	IPR003034
A0A5J6E7T1	A0A5J6E7T1_HUMAN	ATP6	2	A0A023I7H5		A0A024RC78	SEC11L1	Signal peptidase complex catalytic subunit SEC11, 3.4.21.89	2		PF00555	Repeat	Endotoxin_M	delta endotoxin	CL0568		CL0595	Fusion_gly	This superfamily includes several families of viral glycoproteins that mediate fusion with target membranes.											IPR018255	Conserved_site	Ribosomal protein L10e, conserved site				0	A0A024RA58	PF04598		A0A087WTJ2	CL0023		A0A024R355	IPR012337
A0A5J6M9S8	A0A5J6M9S8_HUMAN	ATP6	2	A0A023I7H5		A0A024RC82	ISG20L1	Interferon stimulated exonuclease gene 20kDa-like 1, isoform CRA_a	1		PF00556	Domain	LHC	Antenna complex alpha/beta subunit			CL0596	VPS23_C												IPR018256	Conserved_site	Ribosomal protein L13e, conserved site				0	A0A024RA58	PF17708		A0A087WUV0	CL0361		A0A024R355	IPR013520
A0A5J6MA53	A0A5J6MA53_HUMAN	ATP6	2	A0A023I7H5		A0A024RC91	LASS3	LAG1 longevity assurance homolog 3 (S. cerevisiae), isoform CRA_b	2		PF00557	Domain	Peptidase_M24	Metallopeptidase family M24			CL0597	Post-HMGL												IPR018257	Conserved_site	Ribosomal protein L19, conserved site				0	A0A024RA60	PF08695		A0A087WV53	CL0011		A0A024R355	IPR036361
A0A5J6MG81	A0A5J6MG81_HUMAN	ATP6	2	A0A023I7H5		A0A024RCA1	KIAA1542	CTD-binding SR-like protein rA9, isoform CRA_a	1		PF00558	Domain	Vpu	Vpu protein			CL0598	B_GA												IPR018258	Conserved_site	Ribosomal protein L21, conserved site				0	A0A024RA73	PF00619		A0A087WV53	CL0220		A0A024R355	IPR036397
A0A5P8DM77	A0A5P8DM77_HUMAN	ATP6	2	A0A023I7H5		A0A024RCC6	FRAG1	Post-GPI attachment to proteins factor 2	2		PF00559	Family	Vif	Retroviral Vif (Viral infectivity) protein			CL0599	GH57_38_middle												IPR018259	Conserved_site	Ribosomal protein L21e, conserved site				0	A0A024RA73	PF05729		A0A087WV62	CL0011		A0A024R355	IPR047201
A0A5P8DNK7	A0A5P8DNK7_HUMAN	ATP6	2	A0A023I7H5		A0A024RCC7	FLJ42289	FLJ42289 protein, isoform CRA_a	1		PF00560	Repeat	LRR_1	Leucine Rich Repeat	CL0022		CL0600	S15_NS1												IPR018260	Conserved_site	Ribosomal protein L22/L17, conserved site				0	A0A024RA73	PF13516		A0A087WVN7	CL0004		A0A024R363	IPR046432
A0A5P8DQC4	A0A5P8DQC4_HUMAN	ATP6	2	A0A023I7H5		A0A024RCF0	C11orf36	Chromosome 11 open reading frame 36, isoform CRA_a	1		PF00561	Domain	Abhydrolase_1	alpha/beta hydrolase fold	CL0028		CL0601	Cob_adeno_trans	This superfamily includes cobalamin adenosyltransferase enzymes as well as the uncharacterised protein family DUF1940.											IPR018261	Conserved_site	Ribosomal protein L27, conserved site				0	A0A024RA73	PF17776		A0A087WVN7	CL0229		A0A024R369	IPR020350
A0A5P9RLW2	A0A5P9RLW2_HUMAN	ATP6	2	A0A023I7H5		A0A024RCF5	CXorf34	tRNA (uracil(54)-C(5))-methyltransferase, 2.1.1.35	2		PF00562	Domain	RNA_pol_Rpb2_6	RNA polymerase Rpb2, domain 6	CL0410		CL0602	Kringle	This superfamily includes both Kringle domains and fibronectin type II domains.	[1]. Kringles: modules specialized for protein binding. Homology of the gelatin-binding region of fibronectin with the kringle structures of proteases. Patthy L, Trexler M, Vali Z, Banyai L, Varadi A FEBS Lett. 171, 131-136, (1984). PMID: 6373375										IPR018262	Conserved_site	Ribosomal protein L27e, conserved site				0	A0A024RA73	PF17779		A0A087WVX3	CL0023		A0A024R377	IPR001356
A0A5P9RM30	A0A5P9RM30_HUMAN	ATP6	2	A0A023I7H5		A0A024RCG3	CARS	cysteine--tRNA ligase, 6.1.1.16, Cysteinyl-tRNA synthetase	2		PF00563	Domain	EAL	EAL domain	CL0276		CL0603	AA_dh_N	According to SCOP this superfamilies core fold has 3 layers in an alpha/beta/alpha configuration. Its central parallel beta sheet of four stands has the order 2134. In amino acid dehydrogenases this domain participates in dimerisation. This superfamily also includes domains from tetrahydrofolate dehydrogenase/cyclohydrolase, methylene-tetrahydromethanopterin dehydrogenase and shikimate dehydrogen…											IPR018263	Conserved_site	Ribosomal protein L32e, conserved site				0	A0A024RA77	PF00240		A0A087WW87	CL0011		A0A024R377	IPR009057
A0A5P9RM99	A0A5P9RM99_HUMAN	ATP6	2	A0A023I7H5		A0A024RCG4	FSHPRH1	FSH primary response (LRPR1 homolog, rat) 1, isoform CRA_b	2		PF00564	Domain	PB1	PB1 domain	CL0072		CL0604	post-AAA	According to SCOP this superfamily contains a 5 helical bundle domain that is found to the C-terminus of a P-loop AAA domain.											IPR018264	Conserved_site	Ribosomal protein L33, conserved site				0	A0A024RA80	PF00085		A0A087WWS6	CL0053		A0A024R377	IPR013087
A0A5P9RNG4	A0A5P9RNG4_HUMAN	ATP6	2	A0A023I7H5		A0A024RCJ2	HIST1H2BJ	Histone H2B	2		PF00565	Domain	SNase	Staphylococcal nuclease homologue	CL0049		CL0605	ssDNA_NP_VP	According to SCOP this superfamily includes proteins that have a beta sandwich fold with two sheets in a jelly roll topology. Families in this superfamily belong to various ssDNA viruses.											IPR018265	Conserved_site	Ribosomal protein L35, conserved site				0	A0A024RA80	PF00334		A0A087WY62	CL0001		A0A024R377	IPR038861
A0A5P9RPZ1	A0A5P9RPZ1_HUMAN	ATP6	2	A0A023I7H5		A0A024RCJ9	HIST1H2BN	Histone H2B	2		PF00566	Family	RabGAP-TBC	Rab-GTPase-TBC domain			CL0606	Phage_fibre	According to SCOP this superfamily includes phage tail fibre proteins that form homotrimers with each chain donating 3 beta-strands per turn of the helix											IPR018266	Conserved_site	Ribosomal protein L35Ae, conserved site				0	A0A024RA81	PF05822		A0A087WYE8	CL0011		A0A024R377	IPR045762
A0A5P9RRN8	A0A5P9RRN8_HUMAN	ATP6	2	A0A023I7H5		A0A024RCK7	ZNF192	Zinc finger protein 192, isoform CRA_a	1		PF00567	Domain	TUDOR	Tudor domain	CL0049		CL0607	TNF_receptor												IPR018267	Conserved_site	Ribosomal protein L37e, conserved site				0	A0A024RA85	PF00069		A0A087WYV9	CL0466		A0A024R386	IPR029709
A0A649YED7	A0A649YED7_HUMAN	ATP6	2	A0A023I7H5		A0A024RCK9	ZNF193	Zinc finger protein 193, isoform CRA_a	1		PF00568	Domain	WH1	WH1 domain	CL0266		CL0608	Reductase_C	This domain is found at the C-terminus of a variety of FAD/NAD-linked reductases.											IPR018268	Conserved_site	Ribosomal protein S10, conserved site				0	A0A024RA85	PF12330		A0A087WZ39	CL0011		A0A024R390	IPR000504
A0A649YEN4	A0A649YEN4_HUMAN	ATP6	2	A0A023I7H5		A0A024RCL4	ZNF323	Zinc finger protein 323, isoform CRA_a	1		PF00569	Domain	ZZ	Zinc finger, ZZ type	CL0006		CL0609	sPC4_like	According to SCOP this superfamily contains a helix-swapped dimer of beta(4)-alpha motifs. Members of this superfamily are ssDNA binding domains found transcriptional regulators.											IPR018269	Conserved_site	Ribosomal protein S13, conserved site				0	A0A024RAA1	PF04193		A0A087X0K7	CL0011		A0A024R390	IPR012337
A0A649YF38	A0A649YF38_HUMAN	ATP6	2	A0A023I7H5		A0A024RCL8	HIST1H2BK	Histone H2B	2		PF00570	Domain	HRDC	HRDC domain	CL0426		CL0610	ETAP	According to SCOP the domains in this superfamily have an SH3 like barrel fold.											IPR018271	Conserved_site	Ribosomal protein S14, conserved site				0	A0A024RAA7	PF00386		A0A087X0M5	CL0011		A0A024R390	IPR012677
A0A649YFA4	A0A649YFA4_HUMAN	ATP6	2	A0A023I7H5		A0A024RCM5	C6orf48	Chromosome 6 open reading frame 48, isoform CRA_b	1		PF00571	Domain	CBS	CBS domain			CL0611	Hexon	This superfamily includes beta-sandwich viral coat proteins.											IPR018273	Conserved_site	Ribosomal protein S17e, conserved site				0	A0A024RAA7	PF01391		A0A087X0R7	CL0125		A0A024R390	IPR013520
A0A649YH07	A0A649YH07_HUMAN	ATP6	2	A0A023I7H5		A0A024RCN6	VARS	Valine--tRNA ligase, 6.1.1.9, Valyl-tRNA synthetase	2		PF00572	Family	Ribosomal_L13	Ribosomal protein L13			CL0612	PHM_PNGase_F	Members of this superfamily adopt a beta-sandwich fold. With two adjacent domains in a protein interacting in the same way as nucleoplasmins that share the same fold. This superfamily includes the Peptide-N-glycosidase F enzymes and the peptidylglycine alpha-hydroxylating monooxygenase enzymes.											IPR018275	Conserved_site	Ribosomal protein S18, conserved site				0	A0A024RAB1	PF00169		A0A088RIW4	CL0714		A0A024R390	IPR034922
A0A649YHJ4	A0A649YHJ4_HUMAN	ATP6	2	A0A023I7H5		A0A024RCN7	SNHG32	Chromosome 6 open reading frame 48, isoform CRA_a, Small nucleolar RNA host gene 32	1		PF00573	Family	Ribosomal_L4	Ribosomal protein L4/L1 family			CL0613	Terp_synthase	This superfamily includes a diverse range of terpene synthase enzymes which share an alpha helical core.											IPR018277	Conserved_site	Ribosomal protein S19e, conserved site				0	A0A024RAB1	PF01412		A0A089VKS7	CL0361		A0A024R390	IPR035979
A0A650AVB0	A0A650AVB0_HUMAN	ATP6	2	A0A023I7H5		A0A024RCU2	BAT4	GPANK1, HLA-B associated transcript 4, isoform CRA_a	1		PF00574	Domain	CLP_protease	Clp protease	CL0127		CL0614	L27												IPR018278	Conserved_site	Ribosomal protein S21, conserved site				0	A0A024RAB1	PF12796		A0A090N7U3	CL0361		A0A024R390	IPR036397
A0A6B7GKG9	A0A6B7GKG9_HUMAN	ATP6	2	A0A023I7H5		A0A024RCV8	MSH5-SAPCD1	DNA mismatch repair protein	2		PF00575	Domain	S1	S1 RNA binding domain	CL0021		CL0615	ALDC	This superfamiy includes the enzyme acetolactate decarboxylase as well as s number of other uncharacterised presumed enzymes. The core of this superfamily is an alpha/beta domain with a highly curved beta sheet that often has a zinc cordination site with three histidine residues.	[1]. Structure and mechanism of acetolactate decarboxylase. Marlow VA, Rea D, Najmudin S, Wills M, Fulop V ACS Chem Biol. 8, 2339-2344, (2013). PMID: 23985082										IPR018279	Conserved_site	Ribosomal protein S21e, conserved site				0	A0A024RAB1	PF16746		A0A090N7U5	CL0361		A0A024R390	IPR047021
A0A6B7PVU8	A0A6B7PVU8_HUMAN	ATP6	2	A0A023I7H5		A0A024RCW2	C6orf106	Chromosome 6 open reading frame 106, isoform CRA_a	2		PF00576	Domain	Transthyretin	HIUase/Transthyretin family	CL0287		CL0616	SPOC	The crystal structure of the SPOC domain [3] showed it has similarity with the beta barrel domain of the Ku proteins. These domains share a 7 stranded beta barrel. In the Ku proteins this domain interacts DNA, whereas the SPOC domain mediates protein binding.	[1]. SPOC: a widely distributed domain associated with cancer, apoptosis and transcription. Sanchez-Pulido L, Rojas AM, van Wely KH, Martinez-A C, Valencia A (). PMID: 15239844	[2]. NMR assignments of SPOC domain of the human transcriptional corepressor SHARP in complex with a C-terminal SMRT peptide. Mikami S, Kanaba T, Ito Y, Mishima M Biomol NMR Assign. 7, 267-270, (2013). PMID: 22987228	[3]. A conserved structural motif reveals the essential transcriptional repression function of Spen proteins and their role in developmental signaling. Ariyoshi M, Schwabe JW Genes Dev 17, 1909-1920, (2003). PMID: 12897056								IPR018280	Conserved_site	Ribosomal protein S3, conserved site				0	A0A024RAB4	PF00245		A0A090N7V4	CL0023		A0A024R395	IPR003701
A0A6B9QAI7	A0A6B9QAI7_HUMAN	ATP6	2	A0A023I7H5		A0A024RCW8	DOM3Z	Decapping nuclease, 3.6.1.-	3		PF00577	Family	Usher	Outer membrane usher protein	CL0193		CL0617	Peroxidase	This superfamily includes two families of heme-dependent peroxidases that have an all alpha helical fold.											IPR018281	Conserved_site	Ribosomal protein S3Ae, conserved site				0	A0A024RAB5	PF02145		A0A090N7V5	CL0278		A0A024R395	IPR004843
A0A6B9RB46	A0A6B9RB46_HUMAN	ATP6	2	A0A023I7H5		A0A024RCY7	C6orf64	Chromosome 6 open reading frame 64, isoform CRA_a	1		PF00578	Domain	AhpC-TSA	AhpC/TSA family	CL0172		CL0618	MCR	Methyl-coenzyme M reductase (MCR) is the enzyme responsible for microbial formation of methane. It is a hexamer composed of 2 alpha (Pfam:PF02745), 2 beta (Pfam:PF02241), and 2 gamma (Pfam:PF02240) subunits with two identical nickel porphinoid active sites. The N-terminal domain has a ferredoxin-like fold.											IPR018282	Conserved_site	Ribosomal protein S6/S6e/A/B/2, conserved site				0	A0A024RAB5	PF02188		A0A090N7V7	CL0347		A0A024R395	IPR007281
A0A6B9RB90	A0A6B9RB90_HUMAN	ATP6	2	A0A023I7H5		A0A024RCY9	C6orf130	Chromosome 6 open reading frame 130, isoform CRA_b	1		PF00579	Family	tRNA-synt_1b	tRNA synthetases class I (W and Y)	CL0039		CL0619	Mog1p_PsbP	Members of this superfamily have a 7 stranded antiparallel beta sheet. The family includes the Mog1p protein and the PsbP proteins.	[1]. Crystal structure of the PsbP protein of photosystem II from Nicotiana tabacum. Ifuku K, Nakatsu T, Kato H, Sato F EMBO Rep. 5, 362-367, (2004). PMID: 15031714										IPR018283	Conserved_site	Ribosomal protein S8e, conserved site				0	A0A024RAB9	PF00386		A0A090N7W0	CL0220		A0A024R395	IPR029052
A0A6B9RC65	A0A6B9RC65_HUMAN	ATP6	2	A0A023I7H5		A0A024RCZ2	TNRC5	Trinucleotide repeat containing 5, isoform CRA_g	1		PF00580	Domain	UvrD-helicase	UvrD/REP helicase N-terminal domain	CL0023		CL0620	Antihemostatic	This superfamily includes three families of leech antihemostatic proteins that have a knokttin fold.											IPR018293	Conserved_site	43kDa postsynaptic, conserved site				0	A0A024RAB9	PF01391		A0A090N7W0	CL0487		A0A024R395	IPR038487
A0A6B9RCC6	A0A6B9RCC6_HUMAN	ATP6	2	A0A023I7H5		A0A024RCZ4	C6orf1	Chromosome 6 open reading frame 1, isoform CRA_a	1		PF00581	Domain	Rhodanese	Rhodanese-like domain	CL0031		CL0621	Colipase	This superfamily includes the two subdomains of colipase along with the black mamba Intestinal toxin 1 [1]. This superfamily has a knottin fold.	[1]. A structural homologue of colipase in black mamba venom revealed by NMR floating disulphide bridge analysis. Boisbouvier J, Albrand JP, Blackledge M, Jaquinod M, Schweitz H, Lazdunski M, Marion D J Mol Biol. 283, 205-219, (1998). PMID: 9761684										IPR018294	Conserved_site	4-diphosphocytidyl-2C-methyl-D-erythritol synthase, conserved site				0	A0A024RAC6	PF06881		A0A090N7W5	CL0022		A0A024R395	IPR041796
[truncated: 167,085 more rows]
