# Supplementary material
Source: HighWire-hosted journal article supplement (doi:10.1101/rna.079848.123)
Supplement: Supplemental_Table_S3.xlsx [file Supplemental_Table_S3.xlsx]

## Sheet: Supplemental Table S3
Supplemental Table S3
For information on assignment of UniProt IDs and mapping of Pfam and InterPro IDs, see Supplemental Table S2.
Log10(%TP) values represent log10 normalized average %TP values of three independent replicates. For additional information on candidate RBPs and listed metrics, see Supplemental Table S1.
Pfam clan.														Pfam clan.															Pfam coiled-coil.														Pfam coiled-coil.
Mapped to 1 or more candidate RBPs containing estimated %CL.														Mapped to 3 or more candidate RBPs containing estimated %CL.															Mapped to 1 or more candidate RBPs containing estimated %CL.														Mapped to 3 or more candidate RBPs containing estimated %CL.
Pfam clan ID	Name	%CL rank	# of candidate RBPs	Average %CL	Assigned UniProt ID	Primary gene name	Protein name	(log10(%TP))input	(log10(%TP))clRNP	Log10(%CL)	%CL	%CL bin		Pfam clan ID	Name	%CL rank	# of candidate RBPs	Average %CL	Assigned UniProt ID	Primary gene name	Protein name	(log10(%TP))input	(log10(%TP))clRNP	Log10(%CL)	%CL	%CL bin			Pfam ID	Name	%CL rank	# of candidate RBPs	Average %CL	Assigned UniProt ID	Primary gene name	Protein name	(log10(%TP))input	(log10(%TP))clRNP	Log10(%CL)	%CL	%CL bin		Pfam ID	Name	%CL rank	# of candidate RBPs	Average %CL	Assigned UniProt ID	Primary gene name
CL0616	SPOC	1	7	8.53815	Q8NDT2	RBM15B	Putative RNA-binding protein 15B, One-twenty two protein 3, HsOTT3, HuOTT3, RNA-binding motif protein 15B	-2.90694	-1.6414	1.37013	23.4494	>10.0%		CL0616	SPOC	1	7	8.53815	Q8NDT2	RBM15B	Putative RNA-binding protein 15B, One-twenty two protein 3, HsOTT3, HuOTT3, RNA-binding motif protein 15B	-2.90694	-1.6414	1.37013	23.4494	>10.0%			PF06008	Laminin_I	1	2	0.874263	O15230	LAMA5	Laminin subunit alpha-5, Laminin-10 subunit alpha, Laminin-11 subunit alpha, Laminin-15 subunit alpha	-3.5183	-3.24084	0.124636	1.3324	1.0-10.0%		PF20492	ERM_helical	1	3	0.0856809	P15311	EZR
CL0616	SPOC	1	7	8.53815	Q96T58	SPEN	Msx2-interacting protein, SMART/HDAC1-associated repressor protein, SPEN homolog	-2.06087	-0.941735	1.18712	15.3858	>10.0%		CL0616	SPOC	1	7	8.53815	Q96T58	SPEN	Msx2-interacting protein, SMART/HDAC1-associated repressor protein, SPEN homolog	-2.06087	-0.941735	1.18712	15.3858	>10.0%			PF06008	Laminin_I	1	2	0.874263	P25391	LAMA1	Laminin subunit alpha-1, Laminin A chain, Laminin-1 subunit alpha, Laminin-3 subunit alpha, S-laminin subunit alpha, S-LAM alpha	-3.07034	-3.25901	-0.38078	0.416122	0.1-1.0%		PF20492	ERM_helical	1	3	0.0856809	P26038	MSN
CL0616	SPOC	1	7	8.53815	Q96T37	RBM15	RNA-binding protein 15, One-twenty two protein 1, RNA-binding motif protein 15	-2.1836	-1.01887	1.18163	15.1925	>10.0%		CL0616	SPOC	1	7	8.53815	Q96T37	RBM15	RNA-binding protein 15, One-twenty two protein 1, RNA-binding motif protein 15	-2.1836	-1.01887	1.18163	15.1925	>10.0%			PF06009	Laminin_II	2	2	0.874263	O15230	LAMA5	Laminin subunit alpha-5, Laminin-10 subunit alpha, Laminin-11 subunit alpha, Laminin-15 subunit alpha	-3.5183	-3.24084	0.124636	1.3324	1.0-10.0%		PF20492	ERM_helical	1	3	0.0856809	P35241	RDX
CL0616	SPOC	1	7	8.53815	Q92576	PHF3	PHD finger protein 3	-3.30676	-2.86446	0.545638	3.51267	1.0-10.0%		CL0616	SPOC	1	7	8.53815	Q92576	PHF3	PHD finger protein 3	-3.30676	-2.86446	0.545638	3.51267	1.0-10.0%			PF06009	Laminin_II	2	2	0.874263	P25391	LAMA1	Laminin subunit alpha-1, Laminin A chain, Laminin-1 subunit alpha, Laminin-3 subunit alpha, S-laminin subunit alpha, S-LAM alpha	-3.07034	-3.25901	-0.38078	0.416122	0.1-1.0%
CL0616	SPOC	1	7	8.53815	Q9BTC0	DIDO1	Death-inducer obliterator 1, DIO-1, hDido1, Death-associated transcription factor 1, DATF-1	-2.8011	-2.90061	-0.042872	0.906	0.1-1.0%		CL0616	SPOC	1	7	8.53815	Q9BTC0	DIDO1	Death-inducer obliterator 1, DIO-1, hDido1, Death-associated transcription factor 1, DATF-1	-2.8011	-2.90061	-0.042872	0.906	0.1-1.0%			PF10473	CENP-F_leu_zip	3	1	0.585779	P49454	CENPF	Centromere protein F, CENP-F, AH antigen, Kinetochore protein CENPF, Mitosin	-3.31267	-3.61787	-0.232266	0.585779	0.1-1.0%
CL0616	SPOC	1	7	8.53815	P13010	XRCC5	X-ray repair cross-complementing protein 5, 3.6.4.-, 86 kDa subunit of Ku antigen, ATP-dependent DNA helicase 2 subunit 2, ATP-dependent DNA helicase II 80 kDa subunit, CTC box-binding factor 85 kDa subunit, CTC85, CTCBF, DNA repair protein XRCC5, Ku80, Ku86, Lupus Ku autoantigen protein p86, Nuclear factor IV, Thyroid-lupus autoantigen, TLAA, X-ray repair complementing defective repair in Chines…	-1.0495	-1.24245	-0.131679	0.73845	0.1-1.0%		CL0616	SPOC	1	7	8.53815	P13010	XRCC5	X-ray repair cross-complementing protein 5, 3.6.4.-, 86 kDa subunit of Ku antigen, ATP-dependent DNA helicase 2 subunit 2, ATP-dependent DNA helicase II 80 kDa subunit, CTC box-binding factor 85 kDa subunit, CTC85, CTCBF, DNA repair protein XRCC5, Ku80, Ku86, Lupus Ku autoantigen protein p86, Nuclear factor IV, Thyroid-lupus autoantigen, TLAA, X-ray repair complementing defective repair in Chines…	-1.0495	-1.24245	-0.131679	0.73845	0.1-1.0%			PF10481	CENP-F_N	4	1	0.585779	P49454	CENPF	Centromere protein F, CENP-F, AH antigen, Kinetochore protein CENPF, Mitosin	-3.31267	-3.61787	-0.232266	0.585779	0.1-1.0%
CL0616	SPOC	1	7	8.53815	P12956	XRCC6	X-ray repair cross-complementing protein 6, 3.6.4.-, 4.2.99.-, 5'-deoxyribose-5-phosphate lyase Ku70, 5'-dRP lyase Ku70, 70 kDa subunit of Ku antigen, ATP-dependent DNA helicase 2 subunit 1, ATP-dependent DNA helicase II 70 kDa subunit, CTC box-binding factor 75 kDa subunit, CTC75, CTCBF, DNA repair protein XRCC6, Lupus Ku autoantigen protein p70, Ku70, Thyroid-lupus autoantigen, TLAA, X-ray repa…	-1.07232	-1.37506	-0.2349	0.582238	0.1-1.0%		CL0616	SPOC	1	7	8.53815	P12956	XRCC6	X-ray repair cross-complementing protein 6, 3.6.4.-, 4.2.99.-, 5'-deoxyribose-5-phosphate lyase Ku70, 5'-dRP lyase Ku70, 70 kDa subunit of Ku antigen, ATP-dependent DNA helicase 2 subunit 1, ATP-dependent DNA helicase II 70 kDa subunit, CTC box-binding factor 75 kDa subunit, CTC75, CTCBF, DNA repair protein XRCC6, Lupus Ku autoantigen protein p70, Ku70, Thyroid-lupus autoantigen, TLAA, X-ray repa…	-1.07232	-1.37506	-0.2349	0.582238	0.1-1.0%			PF07926	TPR_MLP1_2	5	1	0.192332	P12270	TPR	Nucleoprotein TPR, Megator, NPC-associated intranuclear protein, Translocated promoter region protein	-1.57209	-2.14498	-0.715947	0.192332	0.1-1.0%
CL0537	CCCH_zf	2	19	8.34949	P79522	PRR3	Proline-rich protein 3, MHC class I region proline-rich protein CAT56	-3.94923	-2.45476	1.84173	69.46	>10.0%		CL0537	CCCH_zf	2	19	8.34949	P79522	PRR3	Proline-rich protein 3, MHC class I region proline-rich protein CAT56	-3.94923	-2.45476	1.84173	69.46	>10.0%			PF09728	Taxilin	6	2	0.182758	Q9NUQ3	TXLNG	Gamma-taxilin, Environmental lipopolysaccharide-responding gene protein, Factor inhibiting ATF4-mediated transcription, FIAT, Lipopolysaccharide-specific response protein 5	-2.33789	-2.6988	-0.659808	0.218873	0.1-1.0%
CL0537	CCCH_zf	2	19	8.34949	Q8IWR0	ZC3H7A	Zinc finger CCCH domain-containing protein 7A	-3.01086	-1.65862	1.44747	28.0203	>10.0%		CL0537	CCCH_zf	2	19	8.34949	Q8IWR0	ZC3H7A	Zinc finger CCCH domain-containing protein 7A	-3.01086	-1.65862	1.44747	28.0203	>10.0%			PF09728	Taxilin	6	2	0.182758	P40222	TXLNA	Alpha-taxilin	-1.8347	-2.74293	-0.833738	0.146643	0.1-1.0%
CL0537	CCCH_zf	2	19	8.34949	Q9NR56	MBNL1	Muscleblind-like protein 1, Triplet-expansion RNA-binding protein	-2.12251	-1.0392	1.02778	10.6607	>10.0%		CL0537	CCCH_zf	2	19	8.34949	Q9NR56	MBNL1	Muscleblind-like protein 1, Triplet-expansion RNA-binding protein	-2.12251	-1.0392	1.02778	10.6607	>10.0%			PF05672	MAP7	7	2	0.151861	Q8IWC1	MAP7D3	MAP7 domain-containing protein 3	-3.17818	-3.85487	-0.68256	0.207702	0.1-1.0%
CL0537	CCCH_zf	2	19	8.34949	Q9H0J9	PARP12	Protein mono-ADP-ribosyltransferase PARP12, 2.4.2.-, ADP-ribosyltransferase diphtheria toxin-like 12, ARTD12, Poly [ADP-ribose] polymerase 12, PARP-12, Zinc finger CCCH domain-containing protein 1	-2.50939	-1.64589	0.9239	8.39266	1.0-10.0%		CL0537	CCCH_zf	2	19	8.34949	Q9H0J9	PARP12	Protein mono-ADP-ribosyltransferase PARP12, 2.4.2.-, ADP-ribosyltransferase diphtheria toxin-like 12, ARTD12, Poly [ADP-ribose] polymerase 12, PARP-12, Zinc finger CCCH domain-containing protein 1	-2.50939	-1.64589	0.9239	8.39266	1.0-10.0%			PF05672	MAP7	7	2	0.151861	Q14244	MAP7	Ensconsin, Epithelial microtubule-associated protein of 115 kDa, E-MAP-115, Microtubule-associated protein 7, MAP-7	-2.19376	-3.29939	-1.01764	0.0960194	0.01-0.1%
CL0537	CCCH_zf	2	19	8.34949	Q9UGR2	ZC3H7B	Zinc finger CCCH domain-containing protein 7B, Rotavirus 'X'-associated non-structural protein, RoXaN	-2.40192	-1.6201	0.878415	7.55814	1.0-10.0%		CL0537	CCCH_zf	2	19	8.34949	Q9UGR2	ZC3H7B	Zinc finger CCCH domain-containing protein 7B, Rotavirus 'X'-associated non-structural protein, RoXaN	-2.40192	-1.6201	0.878415	7.55814	1.0-10.0%			PF16735	MYO10_CC	8	1	0.0865429	Q9HD67	MYO10	Unconventional myosin-X, Unconventional myosin-10	-3.71827	-4.37218	-1.06277	0.0865429	0.01-0.1%
CL0537	CCCH_zf	2	19	8.34949	Q96QC0	PPP1R10	Serine/threonine-protein phosphatase 1 regulatory subunit 10, MHC class I region proline-rich protein CAT53, PP1-binding protein of 114 kDa, Phosphatase 1 nuclear targeting subunit, Protein FB19, p99	-2.42323	-1.68819	0.84024	6.92213	1.0-10.0%		CL0537	CCCH_zf	2	19	8.34949	Q96QC0	PPP1R10	Serine/threonine-protein phosphatase 1 regulatory subunit 10, MHC class I region proline-rich protein CAT53, PP1-binding protein of 114 kDa, Phosphatase 1 nuclear targeting subunit, Protein FB19, p99	-2.42323	-1.68819	0.84024	6.92213	1.0-10.0%			PF20492	ERM_helical	9	3	0.0856809	P15311	EZR	Ezrin, Cytovillin, Villin-2, p81	-1.03171	-1.95654	-0.959898	0.109673	0.1-1.0%
CL0537	CCCH_zf	2	19	8.34949	Q7Z2W4	ZC3HAV1	Zinc finger CCCH-type antiviral protein 1, ADP-ribosyltransferase diphtheria toxin-like 13, ARTD13, Inactive Poly [ADP-ribose] polymerase 13, PARP13, Zinc finger CCCH domain-containing protein 2, Zinc finger antiviral protein, ZAP	-1.53752	-0.790168	0.815811	6.54351	1.0-10.0%		CL0537	CCCH_zf	2	19	8.34949	Q7Z2W4	ZC3HAV1	Zinc finger CCCH-type antiviral protein 1, ADP-ribosyltransferase diphtheria toxin-like 13, ARTD13, Inactive Poly [ADP-ribose] polymerase 13, PARP13, Zinc finger CCCH domain-containing protein 2, Zinc finger antiviral protein, ZAP	-1.53752	-0.790168	0.815811	6.54351	1.0-10.0%			PF20492	ERM_helical	9	3	0.0856809	P26038	MSN	Moesin, Membrane-organizing extension spike protein	-0.58601	-1.67826	-1.04432	0.0902986	0.01-0.1%
CL0537	CCCH_zf	2	19	8.34949	O75152	ZC3H11A	Zinc finger CCCH domain-containing protein 11A	-2.36833	-1.90078	0.550759	3.55434	1.0-10.0%		CL0537	CCCH_zf	2	19	8.34949	O75152	ZC3H11A	Zinc finger CCCH domain-containing protein 11A	-2.36833	-1.90078	0.550759	3.55434	1.0-10.0%			PF20492	ERM_helical	9	3	0.0856809	P35241	RDX	Radixin	-1.75974	-3.01411	-1.24359	0.0570707	0.01-0.1%
CL0537	CCCH_zf	2	19	8.34949	Q9H000	MKRN2	E3 ubiquitin-protein ligase makorin-2, 2.3.2.27, RING finger protein 62, RING-type E3 ubiquitin transferase makorin-2	-3.2836	-2.89546	0.501817	3.17554	1.0-10.0%		CL0537	CCCH_zf	2	19	8.34949	Q9H000	MKRN2	E3 ubiquitin-protein ligase makorin-2, 2.3.2.27, RING finger protein 62, RING-type E3 ubiquitin transferase makorin-2	-3.2836	-2.89546	0.501817	3.17554	1.0-10.0%			PF01576	Myosin_tail_1	10	2	0.0322984	P35580	MYH10	Myosin-10, Cellular myosin heavy chain, type B, Myosin heavy chain 10, Myosin heavy chain, non-muscle IIb, Non-muscle myosin heavy chain B, NMMHC-B, Non-muscle myosin heavy chain IIb, NMMHC II-b, NMMHC-IIB	-1.79041	-2.8487	-1.34023	0.0456848	0.01-0.1%
CL0537	CCCH_zf	2	19	8.34949	Q6P158	DHX57	Putative ATP-dependent RNA helicase DHX57, 3.6.4.13, DEAH box protein 57	-2.26362	-1.78831	0.41788	2.61746	1.0-10.0%		CL0537	CCCH_zf	2	19	8.34949	Q6P158	DHX57	Putative ATP-dependent RNA helicase DHX57, 3.6.4.13, DEAH box protein 57	-2.26362	-1.78831	0.41788	2.61746	1.0-10.0%			PF01576	Myosin_tail_1	10	2	0.0322984	P35579	MYH9	Myosin, heavy polypeptide 9, non-muscle, isoform CRA_a	-0.317844	-1.69288	-1.72326	0.0189119	0.01-0.1%
CL0537	CCCH_zf	2	19	8.34949	Q9P2N5	RBM27	RNA-binding protein 27, RNA-binding motif protein 27	-2.61958	-2.32882	0.377848	2.38697	1.0-10.0%		CL0537	CCCH_zf	2	19	8.34949	Q9P2N5	RBM27	RNA-binding protein 27, RNA-binding motif protein 27	-2.61958	-2.32882	0.377848	2.38697	1.0-10.0%			PF00038	Filament	11	2	0.0136797	P02545	LMNA	Prelamin-A/C	-0.550681	-2.23538	-1.7441	0.0180259	0.01-0.1%
CL0537	CCCH_zf	2	19	8.34949	Q6PJT7	ZC3H14	Zinc finger CCCH domain-containing protein 14, Mammalian suppressor of tau pathology-2, MSUT-2, Renal carcinoma antigen NY-REN-37	-2.2871	-2.00151	0.361185	2.29713	1.0-10.0%		CL0537	CCCH_zf	2	19	8.34949	Q6PJT7	ZC3H14	Zinc finger CCCH domain-containing protein 14, Mammalian suppressor of tau pathology-2, MSUT-2, Renal carcinoma antigen NY-REN-37	-2.2871	-2.00151	0.361185	2.29713	1.0-10.0%			PF00038	Filament	11	2	0.0136797	P08670	VIM	Vimentin	0.228137	-1.61554	-2.02995	0.00933358	<0.01%
CL0537	CCCH_zf	2	19	8.34949	Q9UPT8	ZC3H4	Zinc finger CCCH domain-containing protein 4	-2.98783	-2.64823	0.296913	1.98113	1.0-10.0%		CL0537	CCCH_zf	2	19	8.34949	Q9UPT8	ZC3H4	Zinc finger CCCH domain-containing protein 4	-2.98783	-2.64823	0.296913	1.98113	1.0-10.0%
CL0537	CCCH_zf	2	19	8.34949	Q8IXZ2	ZC3H3	Zinc finger CCCH domain-containing protein 3, Smad-interacting CPSF-like factor	-3.63157	-3.61401	0.145881	1.3992	1.0-10.0%		CL0537	CCCH_zf	2	19	8.34949	Q8IXZ2	ZC3H3	Zinc finger CCCH domain-containing protein 3, Smad-interacting CPSF-like factor	-3.63157	-3.61401	0.145881	1.3992	1.0-10.0%
CL0537	CCCH_zf	2	19	8.34949	Q9NXH9	TRMT1	tRNA (guanine(26)-N(2))-dimethyltransferase, 2.1.1.216, tRNA 2,2-dimethylguanosine-26 methyltransferase, tRNA(guanine-26,N(2)-N(2)) methyltransferase, tRNA(m(2,2)G26)dimethyltransferase	-2.10498	-2.13157	0.0446353	1.10824	1.0-10.0%		CL0537	CCCH_zf	2	19	8.34949	Q9NXH9	TRMT1	tRNA (guanine(26)-N(2))-dimethyltransferase, 2.1.1.216, tRNA 2,2-dimethylguanosine-26 methyltransferase, tRNA(guanine-26,N(2)-N(2)) methyltransferase, tRNA(m(2,2)G26)dimethyltransferase	-2.10498	-2.13157	0.0446353	1.10824	1.0-10.0%
CL0537	CCCH_zf	2	19	8.34949	Q01081	U2AF1	Splicing factor U2AF 35 kDa subunit, U2 auxiliary factor 35 kDa subunit, U2 small nuclear RNA auxiliary factor 1, U2 snRNP auxiliary factor small subunit	-1.84465	-2.02436	-0.11132	0.773891	0.1-1.0%		CL0537	CCCH_zf	2	19	8.34949	Q01081	U2AF1	Splicing factor U2AF 35 kDa subunit, U2 auxiliary factor 35 kDa subunit, U2 small nuclear RNA auxiliary factor 1, U2 snRNP auxiliary factor small subunit	-1.84465	-2.02436	-0.11132	0.773891	0.1-1.0%
CL0537	CCCH_zf	2	19	8.34949	Q5T200	ZC3H13	Zinc finger CCCH domain-containing protein 13	-2.93449	-2.61065	-0.184966	0.653182	0.1-1.0%		CL0537	CCCH_zf	2	19	8.34949	Q5T200	ZC3H13	Zinc finger CCCH domain-containing protein 13	-2.93449	-2.61065	-0.184966	0.653182	0.1-1.0%
CL0537	CCCH_zf	2	19	8.34949	Q86VM9	ZC3H18	Zinc finger CCCH domain-containing protein 18, Nuclear protein NHN1	-2.42815	-2.51225	-0.186255	0.651245	0.1-1.0%		CL0537	CCCH_zf	2	19	8.34949	Q86VM9	ZC3H18	Zinc finger CCCH domain-containing protein 18, Nuclear protein NHN1	-2.42815	-2.51225	-0.186255	0.651245	0.1-1.0%
CL0537	CCCH_zf	2	19	8.34949	Q8WU90	ZC3H15	Zinc finger CCCH domain-containing protein 15, DRG family-regulatory protein 1, Likely ortholog of mouse immediate early response erythropoietin 4	-2.11995	-2.52342	-0.314577	0.484644	0.1-1.0%		CL0537	CCCH_zf	2	19	8.34949	Q8WU90	ZC3H15	Zinc finger CCCH domain-containing protein 15, DRG family-regulatory protein 1, Likely ortholog of mouse immediate early response erythropoietin 4	-2.11995	-2.52342	-0.314577	0.484644	0.1-1.0%
CL0221	RRM	3	125	8.11319	Q92879	CELF1	CUGBP Elav-like family member 1, CELF-1, 50 kDa nuclear polyadenylated RNA-binding protein, Bruno-like protein 2, CUG triplet repeat RNA-binding protein 1, CUG-BP1, CUG-BP- and ETR-3-like factor 1, Deadenylation factor CUG-BP, Embryo deadenylation element-binding protein homolog, EDEN-BP homolog, RNA-binding protein BRUNOL-2	-1.67862	-0.0377048	1.74587	55.7015	>10.0%		CL0221	RRM	3	125	8.11319	Q92879	CELF1	CUGBP Elav-like family member 1, CELF-1, 50 kDa nuclear polyadenylated RNA-binding protein, Bruno-like protein 2, CUG triplet repeat RNA-binding protein 1, CUG-BP1, CUG-BP- and ETR-3-like factor 1, Deadenylation factor CUG-BP, Embryo deadenylation element-binding protein homolog, EDEN-BP homolog, RNA-binding protein BRUNOL-2	-1.67862	-0.0377048	1.74587	55.7015	>10.0%
CL0221	RRM	3	125	8.11319	Q15717	ELAVL1	ELAV-like protein 1, Hu-antigen R, HuR	-1.11389	0.444579	1.66172	45.8907	>10.0%		CL0221	RRM	3	125	8.11319	Q15717	ELAVL1	ELAV-like protein 1, Hu-antigen R, HuR	-1.11389	0.444579	1.66172	45.8907	>10.0%
CL0221	RRM	3	125	8.11319	A0AV96	RBM47	RNA-binding protein 47, RNA-binding motif protein 47	-2.40687	-0.882386	1.63833	43.4842	>10.0%		CL0221	RRM	3	125	8.11319	A0AV96	RBM47	RNA-binding protein 47, RNA-binding motif protein 47	-2.40687	-0.882386	1.63833	43.4842	>10.0%
CL0221	RRM	3	125	8.11319	Q15434	RBMS2	RNA-binding motif, single-stranded-interacting protein 2, Suppressor of CDC2 with RNA-binding motif 3	-3.40182	-2.05495	1.53731	34.46	>10.0%		CL0221	RRM	3	125	8.11319	Q15434	RBMS2	RNA-binding motif, single-stranded-interacting protein 2, Suppressor of CDC2 with RNA-binding motif 3	-3.40182	-2.05495	1.53731	34.46	>10.0%
CL0221	RRM	3	125	8.11319	Q13148	TARDBP	TAR DNA-binding protein 43, TDP-43	-1.42889	-0.0126426	1.52787	33.7184	>10.0%		CL0221	RRM	3	125	8.11319	Q13148	TARDBP	TAR DNA-binding protein 43, TDP-43	-1.42889	-0.0126426	1.52787	33.7184	>10.0%
CL0221	RRM	3	125	8.11319	Q01085	TIAL1	Nucleolysin TIAR, TIA-1-related protein	-1.81961	-0.517195	1.41247	25.8505	>10.0%		CL0221	RRM	3	125	8.11319	Q01085	TIAL1	Nucleolysin TIAR, TIA-1-related protein	-1.81961	-0.517195	1.41247	25.8505	>10.0%
CL0221	RRM	3	125	8.11319	Q9BQ04	RBM4B	RNA-binding protein 4B, RNA-binding motif protein 30, RNA-binding motif protein 4B, RNA-binding protein 30	-3.6319	-2.50393	1.40335	25.3135	>10.0%		CL0221	RRM	3	125	8.11319	Q9BQ04	RBM4B	RNA-binding protein 4B, RNA-binding motif protein 30, RNA-binding motif protein 4B, RNA-binding protein 30	-3.6319	-2.50393	1.40335	25.3135	>10.0%
CL0221	RRM	3	125	8.11319	Q8NDT2	RBM15B	Putative RNA-binding protein 15B, One-twenty two protein 3, HsOTT3, HuOTT3, RNA-binding motif protein 15B	-2.90694	-1.6414	1.37013	23.4494	>10.0%		CL0221	RRM	3	125	8.11319	Q8NDT2	RBM15B	Putative RNA-binding protein 15B, One-twenty two protein 3, HsOTT3, HuOTT3, RNA-binding motif protein 15B	-2.90694	-1.6414	1.37013	23.4494	>10.0%
CL0221	RRM	3	125	8.11319	P31483	TIA1	Cytotoxic granule associated RNA binding protein TIA1, Nucleolysin TIA-1 isoform p40, RNA-binding protein TIA-1, T-cell-restricted intracellular antigen-1, TIA-1, p40-TIA-1	-2.33356	-1.11202	1.32918	21.3393	>10.0%		CL0221	RRM	3	125	8.11319	P31483	TIA1	Cytotoxic granule associated RNA binding protein TIA1, Nucleolysin TIA-1 isoform p40, RNA-binding protein TIA-1, T-cell-restricted intracellular antigen-1, TIA-1, p40-TIA-1	-2.33356	-1.11202	1.32918	21.3393	>10.0%
CL0221	RRM	3	125	8.11319	Q9UKM9	RALY	RNA-binding protein Raly, Autoantigen p542, Heterogeneous nuclear ribonucleoprotein C-like 2, hnRNP core protein C-like 2, hnRNP associated with lethal yellow protein homolog	-1.26774	-0.0607417	1.31076	20.453	>10.0%		CL0221	RRM	3	125	8.11319	Q9UKM9	RALY	RNA-binding protein Raly, Autoantigen p542, Heterogeneous nuclear ribonucleoprotein C-like 2, hnRNP core protein C-like 2, hnRNP associated with lethal yellow protein homolog	-1.26774	-0.0607417	1.31076	20.453	>10.0%
CL0221	RRM	3	125	8.11319	P52272	HNRNPM	Heterogeneous nuclear ribonucleoprotein M, hnRNP M	-0.455012	0.745983	1.2933	19.6472	>10.0%		CL0221	RRM	3	125	8.11319	P52272	HNRNPM	Heterogeneous nuclear ribonucleoprotein M, hnRNP M	-0.455012	0.745983	1.2933	19.6472	>10.0%
CL0221	RRM	3	125	8.11319	O95758	PTBP3	Polypyrimidine tract-binding protein 3, Regulator of differentiation 1, Rod1	-2.3908	-1.24072	1.24257	17.4811	>10.0%		CL0221	RRM	3	125	8.11319	O95758	PTBP3	Polypyrimidine tract-binding protein 3, Regulator of differentiation 1, Rod1	-2.3908	-1.24072	1.24257	17.4811	>10.0%
CL0221	RRM	3	125	8.11319	Q8IXT5	RBM12B	RNA-binding protein 12B, RNA-binding motif protein 12B	-2.79594	-1.66662	1.23855	17.32	>10.0%		CL0221	RRM	3	125	8.11319	Q8IXT5	RBM12B	RNA-binding protein 12B, RNA-binding motif protein 12B	-2.79594	-1.66662	1.23855	17.32	>10.0%
CL0221	RRM	3	125	8.11319	P52756	RBM5	RNA-binding protein 5, Protein G15, Putative tumor suppressor LUCA15, RNA-binding motif protein 5, Renal carcinoma antigen NY-REN-9	-2.89429	-1.77427	1.2155	16.4249	>10.0%		CL0221	RRM	3	125	8.11319	P52756	RBM5	RNA-binding protein 5, Protein G15, Putative tumor suppressor LUCA15, RNA-binding motif protein 5, Renal carcinoma antigen NY-REN-9	-2.89429	-1.77427	1.2155	16.4249	>10.0%
CL0221	RRM	3	125	8.11319	Q96T58	SPEN	Msx2-interacting protein, SMART/HDAC1-associated repressor protein, SPEN homolog	-2.06087	-0.941735	1.18712	15.3858	>10.0%		CL0221	RRM	3	125	8.11319	Q96T58	SPEN	Msx2-interacting protein, SMART/HDAC1-associated repressor protein, SPEN homolog	-2.06087	-0.941735	1.18712	15.3858	>10.0%
CL0221	RRM	3	125	8.11319	Q96T37	RBM15	RNA-binding protein 15, One-twenty two protein 1, RNA-binding motif protein 15	-2.1836	-1.01887	1.18163	15.1925	>10.0%		CL0221	RRM	3	125	8.11319	Q96T37	RBM15	RNA-binding protein 15, One-twenty two protein 1, RNA-binding motif protein 15	-2.1836	-1.01887	1.18163	15.1925	>10.0%
CL0221	RRM	3	125	8.11319	O60506	SYNCRIP	Heterogeneous nuclear ribonucleoprotein Q, hnRNP Q, Glycine- and tyrosine-rich RNA-binding protein, GRY-RBP, NS1-associated protein 1, Synaptotagmin-binding, cytoplasmic RNA-interacting protein	-0.861727	0.211482	1.17469	14.9517	>10.0%		CL0221	RRM	3	125	8.11319	O60506	SYNCRIP	Heterogeneous nuclear ribonucleoprotein Q, hnRNP Q, Glycine- and tyrosine-rich RNA-binding protein, GRY-RBP, NS1-associated protein 1, Synaptotagmin-binding, cytoplasmic RNA-interacting protein	-0.861727	0.211482	1.17469	14.9517	>10.0%
CL0221	RRM	3	125	8.11319	P52597	HNRNPF	Heterogeneous nuclear ribonucleoprotein F, hnRNP F, Nucleolin-like protein mcs94-1	-1.04273	0.024097	1.17422	14.9356	>10.0%		CL0221	RRM	3	125	8.11319	P52597	HNRNPF	Heterogeneous nuclear ribonucleoprotein F, hnRNP F, Nucleolin-like protein mcs94-1	-1.04273	0.024097	1.17422	14.9356	>10.0%
CL0221	RRM	3	125	8.11319	Q93062	RBPMS	RNA-binding protein with multiple splicing, RBP-MS, Heart and RRM expressed sequence, Hermes	-4.30156	-3.26677	1.16241	14.5349	>10.0%		CL0221	RRM	3	125	8.11319	Q93062	RBPMS	RNA-binding protein with multiple splicing, RBP-MS, Heart and RRM expressed sequence, Hermes	-4.30156	-3.26677	1.16241	14.5349	>10.0%
CL0221	RRM	3	125	8.11319	P31942	HNRNPH3	Heterogeneous nuclear ribonucleoprotein H3, hnRNP H3, Heterogeneous nuclear ribonucleoprotein 2H9, hnRNP 2H9	-1.43179	-0.408679	1.12706	13.3987	>10.0%		CL0221	RRM	3	125	8.11319	P31942	HNRNPH3	Heterogeneous nuclear ribonucleoprotein H3, hnRNP H3, Heterogeneous nuclear ribonucleoprotein 2H9, hnRNP 2H9	-1.43179	-0.408679	1.12706	13.3987	>10.0%
CL0221	RRM	3	125	8.11319	Q15233	NONO	Non-POU domain-containing octamer-binding protein, NonO protein, 54 kDa nuclear RNA- and DNA-binding protein, p54(nrb), p54nrb, 55 kDa nuclear protein, NMT55, DNA-binding p52/p100 complex, 52 kDa subunit	-0.863348	0.166232	1.1199	13.1796	>10.0%		CL0221	RRM	3	125	8.11319	Q15233	NONO	Non-POU domain-containing octamer-binding protein, NonO protein, 54 kDa nuclear RNA- and DNA-binding protein, p54(nrb), p54nrb, 55 kDa nuclear protein, NMT55, DNA-binding p52/p100 complex, 52 kDa subunit	-0.863348	0.166232	1.1199	13.1796	>10.0%
CL0221	RRM	3	125	8.11319	P31943	HNRNPH1	Heterogeneous nuclear ribonucleoprotein H, hnRNP H	-0.857531	0.152532	1.10977	12.8757	>10.0%		CL0221	RRM	3	125	8.11319	P31943	HNRNPH1	Heterogeneous nuclear ribonucleoprotein H, hnRNP H	-0.857531	0.152532	1.10977	12.8757	>10.0%
CL0221	RRM	3	125	8.11319	Q9Y6M1	IGF2BP2	Insulin-like growth factor 2 mRNA-binding protein 2, IGF2 mRNA-binding protein 2, IMP-2, Hepatocellular carcinoma autoantigen p62, IGF-II mRNA-binding protein 2, VICKZ family member 2	-3.62519	-2.61797	1.10975	12.8749	>10.0%		CL0221	RRM	3	125	8.11319	Q9Y6M1	IGF2BP2	Insulin-like growth factor 2 mRNA-binding protein 2, IGF2 mRNA-binding protein 2, IMP-2, Hepatocellular carcinoma autoantigen p62, IGF-II mRNA-binding protein 2, VICKZ family member 2	-3.62519	-2.61797	1.10975	12.8749	>10.0%
CL0221	RRM	3	125	8.11319	P55795	HNRNPH2	Heterogeneous nuclear ribonucleoprotein H2, hnRNP H2, FTP-3, Heterogeneous nuclear ribonucleoprotein H', hnRNP H'	-1.86541	-0.862954	1.10288	12.6731	>10.0%		CL0221	RRM	3	125	8.11319	P55795	HNRNPH2	Heterogeneous nuclear ribonucleoprotein H2, hnRNP H2, FTP-3, Heterogeneous nuclear ribonucleoprotein H', hnRNP H'	-1.86541	-0.862954	1.10288	12.6731	>10.0%
CL0221	RRM	3	125	8.11319	P14866	HNRNPL	Heterogeneous nuclear ribonucleoprotein L, hnRNP L	-0.884693	0.118205	1.09432	12.4255	>10.0%		CL0221	RRM	3	125	8.11319	P14866	HNRNPL	Heterogeneous nuclear ribonucleoprotein L, hnRNP L	-0.884693	0.118205	1.09432	12.4255	>10.0%
CL0221	RRM	3	125	8.11319	Q96PK6	RBM14	RNA-binding protein 14, Paraspeckle protein 2, PSP2, RNA-binding motif protein 14, RRM-containing coactivator activator/modulator, Synaptotagmin-interacting protein, SYT-interacting protein	-1.43552	-0.457845	1.07503	11.8859	>10.0%		CL0221	RRM	3	125	8.11319	Q96PK6	RBM14	RNA-binding protein 14, Paraspeckle protein 2, PSP2, RNA-binding motif protein 14, RRM-containing coactivator activator/modulator, Synaptotagmin-interacting protein, SYT-interacting protein	-1.43552	-0.457845	1.07503	11.8859	>10.0%
CL0221	RRM	3	125	8.11319	Q8WXF1	PSPC1	Paraspeckle component 1, Paraspeckle protein 1	-2.12656	-1.14757	1.07382	11.8529	>10.0%		CL0221	RRM	3	125	8.11319	Q8WXF1	PSPC1	Paraspeckle component 1, Paraspeckle protein 1	-2.12656	-1.14757	1.07382	11.8529	>10.0%
CL0221	RRM	3	125	8.11319	P23246	SFPQ	Splicing factor, proline- and glutamine-rich, 100 kDa DNA-pairing protein, hPOMp100, DNA-binding p52/p100 complex, 100 kDa subunit, Polypyrimidine tract-binding protein-associated-splicing factor, PSF, PTB-associated-splicing factor	-0.722593	0.246022	1.06438	11.5979	>10.0%		CL0221	RRM	3	125	8.11319	P23246	SFPQ	Splicing factor, proline- and glutamine-rich, 100 kDa DNA-pairing protein, hPOMp100, DNA-binding p52/p100 complex, 100 kDa subunit, Polypyrimidine tract-binding protein-associated-splicing factor, PSF, PTB-associated-splicing factor	-0.722593	0.246022	1.06438	11.5979	>10.0%
CL0221	RRM	3	125	8.11319	P26599	PTBP1	Polypyrimidine tract-binding protein 1, PTB, 57 kDa RNA-binding protein PPTB-1, Heterogeneous nuclear ribonucleoprotein I, hnRNP I	-0.629991	0.316775	1.0636	11.5772	>10.0%		CL0221	RRM	3	125	8.11319	P26599	PTBP1	Polypyrimidine tract-binding protein 1, PTB, 57 kDa RNA-binding protein PPTB-1, Heterogeneous nuclear ribonucleoprotein I, hnRNP I	-0.629991	0.316775	1.0636	11.5772	>10.0%
CL0221	RRM	3	125	8.11319	Q8IY67	RAVER1	Ribonucleoprotein PTB-binding 1, Protein raver-1	-2.49685	-1.53559	1.05313	11.3015	>10.0%		CL0221	RRM	3	125	8.11319	Q8IY67	RAVER1	Ribonucleoprotein PTB-binding 1, Protein raver-1	-2.49685	-1.53559	1.05313	11.3015	>10.0%
CL0221	RRM	3	125	8.11319	Q9BRL6	SRSF8	Serine/arginine-rich splicing factor 8, Pre-mRNA-splicing factor SRP46, Splicing factor SRp46, Splicing factor, arginine/serine-rich 2B	-3.47352	-2.52611	1.04469	11.0838	>10.0%		CL0221	RRM	3	125	8.11319	Q9BRL6	SRSF8	Serine/arginine-rich splicing factor 8, Pre-mRNA-splicing factor SRP46, Splicing factor SRp46, Splicing factor, arginine/serine-rich 2B	-3.47352	-2.52611	1.04469	11.0838	>10.0%
CL0221	RRM	3	125	8.11319	Q4G0J3	LARP7	La-related protein 7, La ribonucleoprotein domain family member 7, hLARP7, P-TEFb-interaction protein for 7SK stability, PIP7S	-2.26018	-1.30092	1.02525	10.5986	>10.0%		CL0221	RRM	3	125	8.11319	Q4G0J3	LARP7	La-related protein 7, La ribonucleoprotein domain family member 7, hLARP7, P-TEFb-interaction protein for 7SK stability, PIP7S	-2.26018	-1.30092	1.02525	10.5986	>10.0%
CL0221	RRM	3	125	8.11319	P07910	HNRNPC	Heterogeneous nuclear ribonucleoproteins C1/C2, hnRNP C1/C2	-0.43446	0.460644	1.01085	10.253	>10.0%		CL0221	RRM	3	125	8.11319	P07910	HNRNPC	Heterogeneous nuclear ribonucleoproteins C1/C2, hnRNP C1/C2	-0.43446	0.460644	1.01085	10.253	>10.0%
CL0221	RRM	3	125	8.11319	P33240	CSTF2	Cleavage stimulation factor subunit 2, CF-1 64 kDa subunit, Cleavage stimulation factor 64 kDa subunit, CSTF 64 kDa subunit, CstF-64	-2.25134	-1.37131	1.00158	10.0366	>10.0%		CL0221	RRM	3	125	8.11319	P33240	CSTF2	Cleavage stimulation factor subunit 2, CF-1 64 kDa subunit, Cleavage stimulation factor 64 kDa subunit, CSTF 64 kDa subunit, CstF-64	-2.25134	-1.37131	1.00158	10.0366	>10.0%
CL0221	RRM	3	125	8.11319	Q8IUH3	RBM45	RNA-binding protein 45, Developmentally-regulated RNA-binding protein 1, RB-1, RNA-binding motif protein 45	-2.91144	-1.99097	0.997222	9.93623	1.0-10.0%		CL0221	RRM	3	125	8.11319	Q8IUH3	RBM45	RNA-binding protein 45, Developmentally-regulated RNA-binding protein 1, RB-1, RNA-binding motif protein 45	-2.91144	-1.99097	0.997222	9.93623	1.0-10.0%
CL0221	RRM	3	125	8.11319	O43390	HNRNPR	Heterogeneous nuclear ribonucleoprotein R, hnRNP R	-1.05542	-0.163201	0.995693	9.90133	1.0-10.0%		CL0221	RRM	3	125	8.11319	O43390	HNRNPR	Heterogeneous nuclear ribonucleoprotein R, hnRNP R	-1.05542	-0.163201	0.995693	9.90133	1.0-10.0%
CL0221	RRM	3	125	8.11319	P98179	RBM3	RNA-binding protein 3, RNA-binding motif protein 3, RNPL	-1.6046	-0.712649	0.985136	9.66354	1.0-10.0%		CL0221	RRM	3	125	8.11319	P98179	RBM3	RNA-binding protein 3, RNA-binding motif protein 3, RNPL	-1.6046	-0.712649	0.985136	9.66354	1.0-10.0%
CL0221	RRM	3	125	8.11319	Q96IZ5	RBM41	RNA-binding protein 41, RNA-binding motif protein 41	-3.57488	-2.64741	0.980042	9.55084	1.0-10.0%		CL0221	RRM	3	125	8.11319	Q96IZ5	RBM41	RNA-binding protein 41, RNA-binding motif protein 41	-3.57488	-2.64741	0.980042	9.55084	1.0-10.0%
CL0221	RRM	3	125	8.11319	Q96EP5	DAZAP1	DAZ-associated protein 1, Deleted in azoospermia-associated protein 1	-1.54404	-0.676787	0.976306	9.46903	1.0-10.0%		CL0221	RRM	3	125	8.11319	Q96EP5	DAZAP1	DAZ-associated protein 1, Deleted in azoospermia-associated protein 1	-1.54404	-0.676787	0.976306	9.46903	1.0-10.0%
CL0221	RRM	3	125	8.11319	Q15427	SF3B4	Splicing factor 3B subunit 4, Pre-mRNA-splicing factor SF3b 49 kDa subunit, Spliceosome-associated protein 49, SAP 49	-2.70094	-1.83418	0.969541	9.32269	1.0-10.0%		CL0221	RRM	3	125	8.11319	Q15427	SF3B4	Splicing factor 3B subunit 4, Pre-mRNA-splicing factor SF3b 49 kDa subunit, Spliceosome-associated protein 49, SAP 49	-2.70094	-1.83418	0.969541	9.32269	1.0-10.0%
CL0221	RRM	3	125	8.11319	P29558	RBMS1	RNA-binding motif, single-stranded-interacting protein 1, Single-stranded DNA-binding protein MSSP-1, Suppressor of CDC2 with RNA-binding motif 2	-2.34907	-1.50524	0.950944	8.93191	1.0-10.0%		CL0221	RRM	3	125	8.11319	P29558	RBMS1	RNA-binding motif, single-stranded-interacting protein 1, Single-stranded DNA-binding protein MSSP-1, Suppressor of CDC2 with RNA-binding motif 2	-2.34907	-1.50524	0.950944	8.93191	1.0-10.0%
CL0221	RRM	3	125	8.11319	Q12849	GRSF1	G-rich sequence factor 1, GRSF-1	-1.78814	-0.921159	0.940326	8.71618	1.0-10.0%		CL0221	RRM	3	125	8.11319	Q12849	GRSF1	G-rich sequence factor 1, GRSF-1	-1.78814	-0.921159	0.940326	8.71618	1.0-10.0%
CL0221	RRM	3	125	8.11319	P22626	HNRNPA2B1	Heterogeneous nuclear ribonucleoproteins A2/B1, hnRNP A2/B1	-0.235078	0.601172	0.931607	8.54292	1.0-10.0%		CL0221	RRM	3	125	8.11319	P22626	HNRNPA2B1	Heterogeneous nuclear ribonucleoproteins A2/B1, hnRNP A2/B1	-0.235078	0.601172	0.931607	8.54292	1.0-10.0%
CL0221	RRM	3	125	8.11319	P19338	NCL	Nucleolin, Protein C23	0.122552	0.891633	0.894285	7.83944	1.0-10.0%		CL0221	RRM	3	125	8.11319	P19338	NCL	Nucleolin, Protein C23	0.122552	0.891633	0.894285	7.83944	1.0-10.0%
CL0221	RRM	3	125	8.11319	Q14011	CIRBP	Cold-inducible RNA-binding protein, A18 hnRNP, Glycine-rich RNA-binding protein CIRP	-1.95846	-1.21011	0.874706	7.49386	1.0-10.0%		CL0221	RRM	3	125	8.11319	Q14011	CIRBP	Cold-inducible RNA-binding protein, A18 hnRNP, Glycine-rich RNA-binding protein CIRP	-1.95846	-1.21011	0.874706	7.49386	1.0-10.0%
CL0221	RRM	3	125	8.11319	Q92804	TAF15	TATA-binding protein-associated factor 2N, 68 kDa TATA-binding protein-associated factor, TAF(II)68, TAFII68, RNA-binding protein 56	-1.73012	-0.976834	0.872205	7.45083	1.0-10.0%		CL0221	RRM	3	125	8.11319	Q92804	TAF15	TATA-binding protein-associated factor 2N, 68 kDa TATA-binding protein-associated factor, TAF(II)68, TAFII68, RNA-binding protein 56	-1.73012	-0.976834	0.872205	7.45083	1.0-10.0%
CL0221	RRM	3	125	8.11319	Q99729	HNRNPAB	Heterogeneous nuclear ribonucleoprotein A/B, hnRNP A/B, APOBEC1-binding protein 1, ABBP-1	-1.29425	-0.52019	0.870108	7.41494	1.0-10.0%		CL0221	RRM	3	125	8.11319	Q99729	HNRNPAB	Heterogeneous nuclear ribonucleoprotein A/B, hnRNP A/B, APOBEC1-binding protein 1, ABBP-1	-1.29425	-0.52019	0.870108	7.41494	1.0-10.0%
CL0221	RRM	3	125	8.11319	P35637	FUS	RNA-binding protein FUS, 75 kDa DNA-pairing protein, Oncogene FUS, Oncogene TLS, POMp75, Translocated in liposarcoma protein	-1.15281	-0.390694	0.862906	7.29299	1.0-10.0%		CL0221	RRM	3	125	8.11319	P35637	FUS	RNA-binding protein FUS, 75 kDa DNA-pairing protein, Oncogene FUS, Oncogene TLS, POMp75, Translocated in liposarcoma protein	-1.15281	-0.390694	0.862906	7.29299	1.0-10.0%
CL0221	RRM	3	125	8.11319	O14979	HNRNPDL	Heterogeneous nuclear ribonucleoprotein D-like, hnRNP D-like, hnRNP DL, AU-rich element RNA-binding factor, JKT41-binding protein, Protein laAUF1	-1.5476	-0.799581	0.860979	7.26071	1.0-10.0%		CL0221	RRM	3	125	8.11319	O14979	HNRNPDL	Heterogeneous nuclear ribonucleoprotein D-like, hnRNP D-like, hnRNP DL, AU-rich element RNA-binding factor, JKT41-binding protein, Protein laAUF1	-1.5476	-0.799581	0.860979	7.26071	1.0-10.0%
CL0221	RRM	3	125	8.11319	Q8WVV9	HNRNPLL	Heterogeneous nuclear ribonucleoprotein L-like, hnRNPLL, Stromal RNA-regulating factor	-2.56728	-1.78083	0.856859	7.19216	1.0-10.0%		CL0221	RRM	3	125	8.11319	Q8WVV9	HNRNPLL	Heterogeneous nuclear ribonucleoprotein L-like, hnRNPLL, Stromal RNA-regulating factor	-2.56728	-1.78083	0.856859	7.19216	1.0-10.0%
CL0221	RRM	3	125	8.11319	Q9NZI8	IGF2BP1	Insulin-like growth factor 2 mRNA-binding protein 1, IGF2 mRNA-binding protein 1, IMP-1, IMP1, Coding region determinant-binding protein, CRD-BP, IGF-II mRNA-binding protein 1, VICKZ family member 1, Zipcode-binding protein 1, ZBP-1	-1.5014	-0.722219	0.853034	7.12909	1.0-10.0%		CL0221	RRM	3	125	8.11319	Q9NZI8	IGF2BP1	Insulin-like growth factor 2 mRNA-binding protein 1, IGF2 mRNA-binding protein 1, IMP-1, IMP1, Coding region determinant-binding protein, CRD-BP, IGF-II mRNA-binding protein 1, VICKZ family member 1, Zipcode-binding protein 1, ZBP-1	-1.5014	-0.722219	0.853034	7.12909	1.0-10.0%
CL0221	RRM	3	125	8.11319	Q13151	HNRNPA0	Heterogeneous nuclear ribonucleoprotein A0, hnRNP A0	-1.37311	-0.630469	0.846802	7.02752	1.0-10.0%		CL0221	RRM	3	125	8.11319	Q13151	HNRNPA0	Heterogeneous nuclear ribonucleoprotein A0, hnRNP A0	-1.37311	-0.630469	0.846802	7.02752	1.0-10.0%
CL0221	RRM	3	125	8.11319	Q9BWF3	RBM4	RNA-binding protein 4, Lark homolog, hLark, RNA-binding motif protein 4, RNA-binding motif protein 4a	-1.85741	-1.04653	0.822567	6.6461	1.0-10.0%		CL0221	RRM	3	125	8.11319	Q9BWF3	RBM4	RNA-binding protein 4, Lark homolog, hLark, RNA-binding motif protein 4, RNA-binding motif protein 4a	-1.85741	-1.04653	0.822567	6.6461	1.0-10.0%
CL0221	RRM	3	125	8.11319	Q9Y4C8	RBM19	Probable RNA-binding protein 19, RNA-binding motif protein 19	-1.52847	-0.824955	0.815056	6.53215	1.0-10.0%		CL0221	RRM	3	125	8.11319	Q9Y4C8	RBM19	Probable RNA-binding protein 19, RNA-binding motif protein 19	-1.52847	-0.824955	0.815056	6.53215	1.0-10.0%
CL0221	RRM	3	125	8.11319	Q9NW64	RBM22	Pre-mRNA-splicing factor RBM22, RNA-binding motif protein 22, Zinc finger CCCH domain-containing protein 16	-2.18681	-1.4611	0.814096	6.51773	1.0-10.0%		CL0221	RRM	3	125	8.11319	Q9NW64	RBM22	Pre-mRNA-splicing factor RBM22, RNA-binding motif protein 22, Zinc finger CCCH domain-containing protein 16	-2.18681	-1.4611	0.814096	6.51773	1.0-10.0%
CL0221	RRM	3	125	8.11319	Q96E39	RBMXL1	RNA binding motif protein, X-linked-like-1, Heterogeneous nuclear ribonucleoprotein G-like 1	-2.38447	-1.67289	0.812525	6.49418	1.0-10.0%		CL0221	RRM	3	125	8.11319	Q96E39	RBMXL1	RNA binding motif protein, X-linked-like-1, Heterogeneous nuclear ribonucleoprotein G-like 1	-2.38447	-1.67289	0.812525	6.49418	1.0-10.0%
CL0221	RRM	3	125	8.11319	O43251	RBFOX2	RNA binding protein fox-1 homolog 2, Fox-1 homolog B, Hexaribonucleotide-binding protein 2, RNA-binding motif protein 9, RNA-binding protein 9, Repressor of tamoxifen transcriptional activity	-2.34616	-1.62081	0.81035	6.46176	1.0-10.0%		CL0221	RRM	3	125	8.11319	O43251	RBFOX2	RNA binding protein fox-1 homolog 2, Fox-1 homolog B, Hexaribonucleotide-binding protein 2, RNA-binding motif protein 9, RNA-binding protein 9, Repressor of tamoxifen transcriptional activity	-2.34616	-1.62081	0.81035	6.46176	1.0-10.0%
CL0221	RRM	3	125	8.11319	P98175	RBM10	RNA-binding protein 10, G patch domain-containing protein 9, RNA-binding motif protein 10, RNA-binding protein S1-1, S1-1	-2.11429	-1.37955	0.804448	6.37453	1.0-10.0%		CL0221	RRM	3	125	8.11319	P98175	RBM10	RNA-binding protein 10, G patch domain-containing protein 9, RNA-binding motif protein 10, RNA-binding protein S1-1, S1-1	-2.11429	-1.37955	0.804448	6.37453	1.0-10.0%
CL0221	RRM	3	125	8.11319	P26368	U2AF2	Splicing factor U2AF 65 kDa subunit, U2 auxiliary factor 65 kDa subunit, hU2AF(65), hU2AF65, U2 snRNP auxiliary factor large subunit	-1.50135	-0.794279	0.796957	6.26552	1.0-10.0%		CL0221	RRM	3	125	8.11319	P26368	U2AF2	Splicing factor U2AF 65 kDa subunit, U2 auxiliary factor 65 kDa subunit, hU2AF(65), hU2AF65, U2 snRNP auxiliary factor large subunit	-1.50135	-0.794279	0.796957	6.26552	1.0-10.0%
CL0221	RRM	3	125	8.11319	P09651	HNRNPA1	Heterogeneous nuclear ribonucleoprotein A1, hnRNP A1, Helix-destabilizing protein, Single-strand RNA-binding protein, hnRNP core protein A1	-0.144815	0.521748	0.780204	6.02843	1.0-10.0%		CL0221	RRM	3	125	8.11319	P09651	HNRNPA1	Heterogeneous nuclear ribonucleoprotein A1, hnRNP A1, Helix-destabilizing protein, Single-strand RNA-binding protein, hnRNP core protein A1	-0.144815	0.521748	0.780204	6.02843	1.0-10.0%
CL0221	RRM	3	125	8.11319	Q14103	HNRNPD	Heterogeneous nuclear ribonucleoprotein D0, hnRNP D0, AU-rich element RNA-binding protein 1	-0.999418	-0.354506	0.755771	5.69864	1.0-10.0%		CL0221	RRM	3	125	8.11319	Q14103	HNRNPD	Heterogeneous nuclear ribonucleoprotein D0, hnRNP D0, AU-rich element RNA-binding protein 1	-0.999418	-0.354506	0.755771	5.69864	1.0-10.0%
CL0221	RRM	3	125	8.11319	Q9NW13	RBM28	RNA-binding protein 28, RNA-binding motif protein 28	-1.63076	-0.948146	0.754313	5.67954	1.0-10.0%		CL0221	RRM	3	125	8.11319	Q9NW13	RBM28	RNA-binding protein 28, RNA-binding motif protein 28	-1.63076	-0.948146	0.754313	5.67954	1.0-10.0%
CL0221	RRM	3	125	8.11319	P51991	HNRNPA3	Heterogeneous nuclear ribonucleoprotein A3, hnRNP A3	-0.789739	-0.163773	0.750179	5.62574	1.0-10.0%		CL0221	RRM	3	125	8.11319	P51991	HNRNPA3	Heterogeneous nuclear ribonucleoprotein A3, hnRNP A3	-0.789739	-0.163773	0.750179	5.62574	1.0-10.0%
CL0221	RRM	3	125	8.11319	Q96DH6	MSI2	RNA-binding protein Musashi homolog 2, Musashi-2	-2.93578	-2.26189	0.73574	5.44176	1.0-10.0%		CL0221	RRM	3	125	8.11319	Q96DH6	MSI2	RNA-binding protein Musashi homolog 2, Musashi-2	-2.93578	-2.26189	0.73574	5.44176	1.0-10.0%
CL0221	RRM	3	125	8.11319	Q9UKA9	PTBP2	Polypyrimidine tract-binding protein 2, Neural polypyrimidine tract-binding protein, Neurally-enriched homolog of PTB, PTB-like protein	-2.74387	-1.75102	0.733355	5.41197	1.0-10.0%		CL0221	RRM	3	125	8.11319	Q9UKA9	PTBP2	Polypyrimidine tract-binding protein 2, Neural polypyrimidine tract-binding protein, Neurally-enriched homolog of PTB, PTB-like protein	-2.74387	-1.75102	0.733355	5.41197	1.0-10.0%
CL0221	RRM	3	125	8.11319	Q16629	SRSF7	Serine/arginine-rich splicing factor 7, Splicing factor 9G8, Splicing factor, arginine/serine-rich 7	-1.15955	-0.538016	0.69195	4.91982	1.0-10.0%		CL0221	RRM	3	125	8.11319	Q16629	SRSF7	Serine/arginine-rich splicing factor 7, Splicing factor 9G8, Splicing factor, arginine/serine-rich 7	-1.15955	-0.538016	0.69195	4.91982	1.0-10.0%
CL0221	RRM	3	125	8.11319	Q13243	SRSF5	Serine/arginine-rich splicing factor 5, Delayed-early protein HRS, Pre-mRNA-splicing factor SRP40, Splicing factor, arginine/serine-rich 5	-1.89372	-1.29043	0.68276	4.81682	1.0-10.0%		CL0221	RRM	3	125	8.11319	Q13243	SRSF5	Serine/arginine-rich splicing factor 5, Delayed-early protein HRS, Pre-mRNA-splicing factor SRP40, Splicing factor, arginine/serine-rich 5	-1.89372	-1.29043	0.68276	4.81682	1.0-10.0%
CL0221	RRM	3	125	8.11319	O00425	IGF2BP3	Insulin-like growth factor 2 mRNA-binding protein 3, IGF2 mRNA-binding protein 3, IMP-3, IGF-II mRNA-binding protein 3, KH domain-containing protein overexpressed in cancer, hKOC, VICKZ family member 3	-1.69388	-1.09064	0.674081	4.72151	1.0-10.0%		CL0221	RRM	3	125	8.11319	O00425	IGF2BP3	Insulin-like growth factor 2 mRNA-binding protein 3, IGF2 mRNA-binding protein 3, IMP-3, IGF-II mRNA-binding protein 3, KH domain-containing protein overexpressed in cancer, hKOC, VICKZ family member 3	-1.69388	-1.09064	0.674081	4.72151	1.0-10.0%
CL0221	RRM	3	125	8.11319	Q08170	SRSF4	Serine/arginine-rich splicing factor 4, Pre-mRNA-splicing factor SRP75, SRP001LB, Splicing factor, arginine/serine-rich 4	-2.39919	-1.85202	0.657964	4.5495	1.0-10.0%		CL0221	RRM	3	125	8.11319	Q08170	SRSF4	Serine/arginine-rich splicing factor 4, Pre-mRNA-splicing factor SRP75, SRP001LB, Splicing factor, arginine/serine-rich 4	-2.39919	-1.85202	0.657964	4.5495	1.0-10.0%
CL0221	RRM	3	125	8.11319	P38159	RBMX	RNA-binding motif protein, X chromosome, Glycoprotein p43, Heterogeneous nuclear ribonucleoprotein G, hnRNP G	-0.874715	-0.344525	0.641992	4.38523	1.0-10.0%		CL0221	RRM	3	125	8.11319	P38159	RBMX	RNA-binding motif protein, X chromosome, Glycoprotein p43, Heterogeneous nuclear ribonucleoprotein G, hnRNP G	-0.874715	-0.344525	0.641992	4.38523	1.0-10.0%
CL0221	RRM	3	125	8.11319	Q13242	SRSF9	Serine/arginine-rich splicing factor 9, Pre-mRNA-splicing factor SRp30C, Splicing factor, arginine/serine-rich 9	-1.95933	-1.45211	0.612653	4.09876	1.0-10.0%		CL0221	RRM	3	125	8.11319	Q13242	SRSF9	Serine/arginine-rich splicing factor 9, Pre-mRNA-splicing factor SRp30C, Splicing factor, arginine/serine-rich 9	-1.95933	-1.45211	0.612653	4.09876	1.0-10.0%
CL0221	RRM	3	125	8.11319	Q12926	ELAVL2	ELAV-like protein 2, ELAV-like neuronal protein 1, Hu-antigen B, HuB, Nervous system-specific RNA-binding protein Hel-N1	-1.79771	-1.29072	0.608032	4.05538	1.0-10.0%		CL0221	RRM	3	125	8.11319	Q12926	ELAVL2	ELAV-like protein 2, ELAV-like neuronal protein 1, Hu-antigen B, HuB, Nervous system-specific RNA-binding protein Hel-N1	-1.79771	-1.29072	0.608032	4.05538	1.0-10.0%
CL0221	RRM	3	125	8.11319	P84103	SRSF3	Serine/arginine-rich splicing factor 3, Pre-mRNA-splicing factor SRP20, Splicing factor, arginine/serine-rich 3	-1.13704	-0.567838	0.605334	4.03027	1.0-10.0%		CL0221	RRM	3	125	8.11319	P84103	SRSF3	Serine/arginine-rich splicing factor 3, Pre-mRNA-splicing factor SRP20, Splicing factor, arginine/serine-rich 3	-1.13704	-0.567838	0.605334	4.03027	1.0-10.0%
CL0221	RRM	3	125	8.11319	Q9UHX1	PUF60	Poly(U)-binding-splicing factor PUF60, 60 kDa poly(U)-binding-splicing factor, FUSE-binding protein-interacting repressor, FBP-interacting repressor, Ro-binding protein 1, RoBP1, Siah-binding protein 1, Siah-BP1	-1.66467	-1.16047	0.593771	3.92438	1.0-10.0%		CL0221	RRM	3	125	8.11319	Q9UHX1	PUF60	Poly(U)-binding-splicing factor PUF60, 60 kDa poly(U)-binding-splicing factor, FUSE-binding protein-interacting repressor, FBP-interacting repressor, Ro-binding protein 1, RoBP1, Siah-binding protein 1, Siah-BP1	-1.66467	-1.16047	0.593771	3.92438	1.0-10.0%
CL0221	RRM	3	125	8.11319	Q9HCJ3	RAVER2	Ribonucleoprotein PTB-binding 2, Protein raver-2	-2.79551	-2.01168	0.581961	3.8191	1.0-10.0%		CL0221	RRM	3	125	8.11319	Q9HCJ3	RAVER2	Ribonucleoprotein PTB-binding 2, Protein raver-2	-2.79551	-2.01168	0.581961	3.8191	1.0-10.0%
CL0221	RRM	3	125	8.11319	O75494	SRSF10	Serine/arginine-rich splicing factor 10, 40 kDa SR-repressor protein, SRrp40, FUS-interacting serine-arginine-rich protein 1, Splicing factor SRp38, Splicing factor, arginine/serine-rich 13A, TLS-associated protein with Ser-Arg repeats, TASR, TLS-associated protein with SR repeats, TLS-associated serine-arginine protein, TLS-associated SR protein	-1.96221	-1.44421	0.567957	3.69791	1.0-10.0%		CL0221	RRM	3	125	8.11319	O75494	SRSF10	Serine/arginine-rich splicing factor 10, 40 kDa SR-repressor protein, SRrp40, FUS-interacting serine-arginine-rich protein 1, Splicing factor SRp38, Splicing factor, arginine/serine-rich 13A, TLS-associated protein with Ser-Arg repeats, TASR, TLS-associated protein with SR repeats, TLS-associated serine-arginine protein, TLS-associated SR protein	-1.96221	-1.44421	0.567957	3.69791	1.0-10.0%
CL0221	RRM	3	125	8.11319	Q9NR30	DDX21	Nucleolar RNA helicase 2, 3.6.4.13, DEAD box protein 21, Gu-alpha, Nucleolar RNA helicase Gu, Nucleolar RNA helicase II, RH II/Gu	-0.75393	-0.306399	0.537008	3.44356	1.0-10.0%		CL0221	RRM	3	125	8.11319	Q9NR30	DDX21	Nucleolar RNA helicase 2, 3.6.4.13, DEAD box protein 21, Gu-alpha, Nucleolar RNA helicase Gu, Nucleolar RNA helicase II, RH II/Gu	-0.75393	-0.306399	0.537008	3.44356	1.0-10.0%
CL0221	RRM	3	125	8.11319	Q01844	EWSR1	RNA-binding protein EWS, EWS oncogene, Ewing sarcoma breakpoint region 1 protein	-1.61961	-1.21289	0.503767	3.18983	1.0-10.0%		CL0221	RRM	3	125	8.11319	Q01844	EWSR1	RNA-binding protein EWS, EWS oncogene, Ewing sarcoma breakpoint region 1 protein	-1.61961	-1.21289	0.503767	3.18983	1.0-10.0%
CL0221	RRM	3	125	8.11319	Q13283	G3BP1	Ras GTPase-activating protein-binding protein 1, G3BP-1, 3.6.4.12, 3.6.4.13, ATP-dependent DNA helicase VIII, hDH VIII, GAP SH3 domain-binding protein 1	-1.26716	-0.865781	0.501959	3.17657	1.0-10.0%		CL0221	RRM	3	125	8.11319	Q13283	G3BP1	Ras GTPase-activating protein-binding protein 1, G3BP-1, 3.6.4.12, 3.6.4.13, ATP-dependent DNA helicase VIII, hDH VIII, GAP SH3 domain-binding protein 1	-1.26716	-0.865781	0.501959	3.17657	1.0-10.0%
CL0221	RRM	3	125	8.11319	Q14151	SAFB2	Scaffold attachment factor B2, SAF-B2	-2.14539	-1.69231	0.501251	3.1714	1.0-10.0%		CL0221	RRM	3	125	8.11319	Q14151	SAFB2	Scaffold attachment factor B2, SAF-B2	-2.14539	-1.69231	0.501251	3.1714	1.0-10.0%
CL0221	RRM	3	125	8.11319	P11940	PABPC1	Polyadenylate-binding protein 1, PABP-1, Poly(A)-binding protein 1	-0.66293	-0.250776	0.497337	3.14294	1.0-10.0%		CL0221	RRM	3	125	8.11319	P11940	PABPC1	Polyadenylate-binding protein 1, PABP-1, Poly(A)-binding protein 1	-0.66293	-0.250776	0.497337	3.14294	1.0-10.0%
CL0221	RRM	3	125	8.11319	Q01130	SRSF2	Serine/arginine-rich splicing factor 2, Protein PR264, Splicing component, 35 kDa, Splicing factor SC35, SC-35, Splicing factor, arginine/serine-rich 2	-1.35139	-0.966967	0.486847	3.06794	1.0-10.0%		CL0221	RRM	3	125	8.11319	Q01130	SRSF2	Serine/arginine-rich splicing factor 2, Protein PR264, Splicing component, 35 kDa, Splicing factor SC35, SC-35, Splicing factor, arginine/serine-rich 2	-1.35139	-0.966967	0.486847	3.06794	1.0-10.0%
CL0221	RRM	3	125	8.11319	P05455	SSB	Lupus La protein, La autoantigen, La ribonucleoprotein, Sjoegren syndrome type B antigen, SS-B	-1.4811	-1.09113	0.483401	3.04369	1.0-10.0%		CL0221	RRM	3	125	8.11319	P05455	SSB	Lupus La protein, La autoantigen, La ribonucleoprotein, Sjoegren syndrome type B antigen, SS-B	-1.4811	-1.09113	0.483401	3.04369	1.0-10.0%
CL0221	RRM	3	125	8.11319	Q13247	SRSF6	Serine/arginine-rich splicing factor 6, Pre-mRNA-splicing factor SRP55, Splicing factor, arginine/serine-rich 6	-1.0007	-0.620884	0.465147	2.91841	1.0-10.0%		CL0221	RRM	3	125	8.11319	Q13247	SRSF6	Serine/arginine-rich splicing factor 6, Pre-mRNA-splicing factor SRP55, Splicing factor, arginine/serine-rich 6	-1.0007	-0.620884	0.465147	2.91841	1.0-10.0%
CL0221	RRM	3	125	8.11319	Q8WUA2	PPIL4	Peptidyl-prolyl cis-trans isomerase-like 4, PPIase, 5.2.1.8, Cyclophilin-like protein PPIL4, Rotamase PPIL4	-3.06517	-2.491	0.421802	2.6412	1.0-10.0%		CL0221	RRM	3	125	8.11319	Q8WUA2	PPIL4	Peptidyl-prolyl cis-trans isomerase-like 4, PPIase, 5.2.1.8, Cyclophilin-like protein PPIL4, Rotamase PPIL4	-3.06517	-2.491	0.421802	2.6412	1.0-10.0%
CL0221	RRM	3	125	8.11319	Q9UN86	G3BP2	Ras GTPase-activating protein-binding protein 2, G3BP-2, GAP SH3 domain-binding protein 2	-1.62907	-1.30859	0.418481	2.62108	1.0-10.0%		CL0221	RRM	3	125	8.11319	Q9UN86	G3BP2	Ras GTPase-activating protein-binding protein 2, G3BP-2, GAP SH3 domain-binding protein 2	-1.62907	-1.30859	0.418481	2.62108	1.0-10.0%
CL0221	RRM	3	125	8.11319	Q9Y580	RBM7	RNA-binding protein 7, RNA-binding motif protein 7	-2.89256	-2.09943	0.417936	2.6178	1.0-10.0%		CL0221	RRM	3	125	8.11319	Q9Y580	RBM7	RNA-binding protein 7, RNA-binding motif protein 7	-2.89256	-2.09943	0.417936	2.6178	1.0-10.0%
CL0221	RRM	3	125	8.11319	P23588	EIF4B	Eukaryotic translation initiation factor 4B, eIF-4B	-0.856035	-0.485989	0.406832	2.55171	1.0-10.0%		CL0221	RRM	3	125	8.11319	P23588	EIF4B	Eukaryotic translation initiation factor 4B, eIF-4B	-0.856035	-0.485989	0.406832	2.55171	1.0-10.0%
CL0221	RRM	3	125	8.11319	Q76FK4	NOL8	Nucleolar protein 8, Nucleolar protein Nop132	-2.63614	-2.34098	0.399611	2.50964	1.0-10.0%		CL0221	RRM	3	125	8.11319	Q76FK4	NOL8	Nucleolar protein 8, Nucleolar protein Nop132	-2.63614	-2.34098	0.399611	2.50964	1.0-10.0%
CL0221	RRM	3	125	8.11319	Q15424	SAFB	Scaffold attachment factor B1, SAF-B, SAF-B1, HSP27 estrogen response element-TATA box-binding protein, HSP27 ERE-TATA-binding protein	-1.61879	-1.28798	0.385185	2.42764	1.0-10.0%		CL0221	RRM	3	125	8.11319	Q15424	SAFB	Scaffold attachment factor B1, SAF-B, SAF-B1, HSP27 estrogen response element-TATA box-binding protein, HSP27 ERE-TATA-binding protein	-1.61879	-1.28798	0.385185	2.42764	1.0-10.0%
CL0221	RRM	3	125	8.11319	Q9GZT3	SLIRP	SRA stem-loop-interacting RNA-binding protein, mitochondrial	-1.54348	-1.25014	0.382156	2.41077	1.0-10.0%		CL0221	RRM	3	125	8.11319	Q9GZT3	SLIRP	SRA stem-loop-interacting RNA-binding protein, mitochondrial	-1.54348	-1.25014	0.382156	2.41077	1.0-10.0%
CL0221	RRM	3	125	8.11319	Q9P2N5	RBM27	RNA-binding protein 27, RNA-binding motif protein 27	-2.61958	-2.32882	0.377848	2.38697	1.0-10.0%		CL0221	RRM	3	125	8.11319	Q9P2N5	RBM27	RNA-binding protein 27, RNA-binding motif protein 27	-2.61958	-2.32882	0.377848	2.38697	1.0-10.0%
CL0221	RRM	3	125	8.11319	Q13310	PABPC4	Polyadenylate-binding protein 4, PABP-4, Poly(A)-binding protein 4, Activated-platelet protein 1, APP-1, Inducible poly(A)-binding protein, iPABP	-1.00749	-0.725923	0.374974	2.37123	1.0-10.0%		CL0221	RRM	3	125	8.11319	Q13310	PABPC4	Polyadenylate-binding protein 4, PABP-4, Poly(A)-binding protein 4, Activated-platelet protein 1, APP-1, Inducible poly(A)-binding protein, iPABP	-1.00749	-0.725923	0.374974	2.37123	1.0-10.0%
CL0221	RRM	3	125	8.11319	P62995	TRA2B	Transformer-2 protein homolog beta, TRA-2 beta, TRA2-beta, hTRA2-beta, Splicing factor, arginine/serine-rich 10, Transformer-2 protein homolog B	-1.45344	-1.1795	0.374439	2.36831	1.0-10.0%		CL0221	RRM	3	125	8.11319	P62995	TRA2B	Transformer-2 protein homolog beta, TRA-2 beta, TRA2-beta, hTRA2-beta, Splicing factor, arginine/serine-rich 10, Transformer-2 protein homolog B	-1.45344	-1.1795	0.374439	2.36831	1.0-10.0%
CL0221	RRM	3	125	8.11319	Q9NWH9	SLTM	SAFB-like transcription modulator, Modulator of estrogen-induced transcription	-2.03213	-1.76691	0.361736	2.30004	1.0-10.0%		CL0221	RRM	3	125	8.11319	Q9NWH9	SLTM	SAFB-like transcription modulator, Modulator of estrogen-induced transcription	-2.03213	-1.76691	0.361736	2.30004	1.0-10.0%
CL0221	RRM	3	125	8.11319	Q14498	RBM39	RNA-binding protein 39, CAPER alpha, CAPERalpha, Hepatocellular carcinoma protein 1, RNA-binding motif protein 39, RNA-binding region-containing protein 2, Splicing factor HCC1	-1.55707	-1.28475	0.321497	2.09651	1.0-10.0%		CL0221	RRM	3	125	8.11319	Q14498	RBM39	RNA-binding protein 39, CAPER alpha, CAPERalpha, Hepatocellular carcinoma protein 1, RNA-binding motif protein 39, RNA-binding region-containing protein 2, Splicing factor HCC1	-1.55707	-1.28475	0.321497	2.09651	1.0-10.0%
CL0221	RRM	3	125	8.11319	Q15020	SART3	Squamous cell carcinoma antigen recognized by T-cells 3, SART-3, Tat-interacting protein of 110 kDa, Tip110, p110 nuclear RNA-binding protein	-1.97094	-1.66646	0.314851	2.06467	1.0-10.0%		CL0221	RRM	3	125	8.11319	Q15020	SART3	Squamous cell carcinoma antigen recognized by T-cells 3, SART-3, Tat-interacting protein of 110 kDa, Tip110, p110 nuclear RNA-binding protein	-1.97094	-1.66646	0.314851	2.06467	1.0-10.0%
CL0221	RRM	3	125	8.11319	Q8TBF4	ZCRB1	Zinc finger CCHC-type and RNA-binding motif-containing protein 1, U11/U12 small nuclear ribonucleoprotein 31 kDa protein, U11/U12 snRNP 31 kDa protein, U11/U12-31K	-2.73518	-2.50696	0.304285	2.01505	1.0-10.0%		CL0221	RRM	3	125	8.11319	Q8TBF4	ZCRB1	Zinc finger CCHC-type and RNA-binding motif-containing protein 1, U11/U12 small nuclear ribonucleoprotein 31 kDa protein, U11/U12 snRNP 31 kDa protein, U11/U12-31K	-2.73518	-2.50696	0.304285	2.01505	1.0-10.0%
CL0221	RRM	3	125	8.11319	Q13595	TRA2A	Transformer-2 protein homolog alpha, TRA-2 alpha, TRA2-alpha, Transformer-2 protein homolog A	-1.81118	-1.63244	0.286746	1.93529	1.0-10.0%		CL0221	RRM	3	125	8.11319	Q13595	TRA2A	Transformer-2 protein homolog alpha, TRA-2 alpha, TRA2-alpha, Transformer-2 protein homolog A	-1.81118	-1.63244	0.286746	1.93529	1.0-10.0%
CL0221	RRM	3	125	8.11319	Q86U42	PABPN1	Polyadenylate-binding protein 2, PABP-2, Poly(A)-binding protein 2, Nuclear poly(A)-binding protein 1, Poly(A)-binding protein II, PABII, Polyadenylate-binding nuclear protein 1	-2.26449	-2.09873	0.266575	1.84746	1.0-10.0%		CL0221	RRM	3	125	8.11319	Q86U42	PABPN1	Polyadenylate-binding protein 2, PABP-2, Poly(A)-binding protein 2, Nuclear poly(A)-binding protein 1, Poly(A)-binding protein II, PABII, Polyadenylate-binding nuclear protein 1	-2.26449	-2.09873	0.266575	1.84746	1.0-10.0%
CL0221	RRM	3	125	8.11319	P08621	SNRNP70	U1 small nuclear ribonucleoprotein 70 kDa, U1 snRNP 70 kDa, U1-70K, snRNP70	-1.34034	-1.03581	0.264741	1.83967	1.0-10.0%		CL0221	RRM	3	125	8.11319	P08621	SNRNP70	U1 small nuclear ribonucleoprotein 70 kDa, U1 snRNP 70 kDa, U1-70K, snRNP70	-1.34034	-1.03581	0.264741	1.83967	1.0-10.0%
CL0221	RRM	3	125	8.11319	Q86V81	ALYREF	THO complex subunit 4, Tho4, Ally of AML-1 and LEF-1, Aly/REF export factor, Transcriptional coactivator Aly/REF, bZIP-enhancing factor BEF	-1.04488	-0.899201	0.263401	1.83401	1.0-10.0%		CL0221	RRM	3	125	8.11319	Q86V81	ALYREF	THO complex subunit 4, Tho4, Ally of AML-1 and LEF-1, Aly/REF export factor, Transcriptional coactivator Aly/REF, bZIP-enhancing factor BEF	-1.04488	-0.899201	0.263401	1.83401	1.0-10.0%
CL0221	RRM	3	125	8.11319	Q9NTZ6	RBM12	RNA-binding protein 12, RNA-binding motif protein 12, SH3/WW domain anchor protein in the nucleus, SWAN	-2.32116	-2.18311	0.227548	1.68868	1.0-10.0%		CL0221	RRM	3	125	8.11319	Q9NTZ6	RBM12	RNA-binding protein 12, RNA-binding motif protein 12, SH3/WW domain anchor protein in the nucleus, SWAN	-2.32116	-2.18311	0.227548	1.68868	1.0-10.0%
CL0221	RRM	3	125	8.11319	Q07955	SRSF1	Serine/arginine-rich splicing factor 1, Alternative-splicing factor 1, ASF-1, Splicing factor, arginine/serine-rich 1, pre-mRNA-splicing factor SF2, P33 subunit	-1.23966	-1.03592	0.212368	1.63068	1.0-10.0%		CL0221	RRM	3	125	8.11319	Q07955	SRSF1	Serine/arginine-rich splicing factor 1, Alternative-splicing factor 1, ASF-1, Splicing factor, arginine/serine-rich 1, pre-mRNA-splicing factor SF2, P33 subunit	-1.23966	-1.03592	0.212368	1.63068	1.0-10.0%
CL0221	RRM	3	125	8.11319	Q14966	ZNF638	Zinc finger protein 638, Cutaneous T-cell lymphoma-associated antigen se33-1, CTCL-associated antigen se33-1, Nuclear protein 220, Zinc finger matrin-like protein	-2.3324	-2.08468	0.181079	1.51733	1.0-10.0%		CL0221	RRM	3	125	8.11319	Q14966	ZNF638	Zinc finger protein 638, Cutaneous T-cell lymphoma-associated antigen se33-1, CTCL-associated antigen se33-1, Nuclear protein 220, Zinc finger matrin-like protein	-2.3324	-2.08468	0.181079	1.51733	1.0-10.0%
CL0221	RRM	3	125	8.11319	Q9Y3A4	RRP7A	Ribosomal RNA-processing protein 7 homolog A, Gastric cancer antigen Zg14	-2.56799	-2.50625	0.141396	1.38483	1.0-10.0%		CL0221	RRM	3	125	8.11319	Q9Y3A4	RRP7A	Ribosomal RNA-processing protein 7 homolog A, Gastric cancer antigen Zg14	-2.56799	-2.50625	0.141396	1.38483	1.0-10.0%
CL0221	RRM	3	125	8.11319	Q15056	EIF4H	Eukaryotic translation initiation factor 4H, eIF-4H, Williams-Beuren syndrome chromosomal region 1 protein	-1.43118	-1.23434	0.110426	1.28951	1.0-10.0%		CL0221	RRM	3	125	8.11319	Q15056	EIF4H	Eukaryotic translation initiation factor 4H, eIF-4H, Williams-Beuren syndrome chromosomal region 1 protein	-1.43118	-1.23434	0.110426	1.28951	1.0-10.0%
CL0221	RRM	3	125	8.11319	Q16630	CPSF6	Cleavage and polyadenylation specificity factor subunit 6, Cleavage and polyadenylation specificity factor 68 kDa subunit, CPSF 68 kDa subunit, Cleavage factor Im complex 68 kDa subunit, CFIm68, Pre-mRNA cleavage factor Im 68 kDa subunit, Protein HPBRII-4/7	-2.14234	-2.13928	0.0918527	1.23553	1.0-10.0%		CL0221	RRM	3	125	8.11319	Q16630	CPSF6	Cleavage and polyadenylation specificity factor subunit 6, Cleavage and polyadenylation specificity factor 68 kDa subunit, CPSF 68 kDa subunit, Cleavage factor Im complex 68 kDa subunit, CFIm68, Pre-mRNA cleavage factor Im 68 kDa subunit, Protein HPBRII-4/7	-2.14234	-2.13928	0.0918527	1.23553	1.0-10.0%
CL0221	RRM	3	125	8.11319	Q9BY77	POLDIP3	Polymerase delta-interacting protein 3, 46 kDa DNA polymerase delta interaction protein, p46, S6K1 Aly/REF-like target, SKAR	-1.86611	-1.91599	0.0398436	1.09608	1.0-10.0%		CL0221	RRM	3	125	8.11319	Q9BY77	POLDIP3	Polymerase delta-interacting protein 3, 46 kDa DNA polymerase delta interaction protein, p46, S6K1 Aly/REF-like target, SKAR	-1.86611	-1.91599	0.0398436	1.09608	1.0-10.0%
CL0221	RRM	3	125	8.11319	Q9BYG3	NIFK	MKI67 FHA domain-interacting nucleolar phosphoprotein, Nucleolar phosphoprotein Nopp34, Nucleolar protein interacting with the FHA domain of pKI-67, hNIFK	-1.87059	-1.92333	0.010868	1.02534	1.0-10.0%		CL0221	RRM	3	125	8.11319	Q9BYG3	NIFK	MKI67 FHA domain-interacting nucleolar phosphoprotein, Nucleolar phosphoprotein Nopp34, Nucleolar protein interacting with the FHA domain of pKI-67, hNIFK	-1.87059	-1.92333	0.010868	1.02534	1.0-10.0%
CL0221	RRM	3	125	8.11319	Q9BQ39	DDX50	ATP-dependent RNA helicase DDX50, 3.6.4.13, DEAD box protein 50, Gu-beta, Nucleolar protein Gu2	-2.34954	-2.46488	-0.0187215	0.957808	0.1-1.0%		CL0221	RRM	3	125	8.11319	Q9BQ39	DDX50	ATP-dependent RNA helicase DDX50, 3.6.4.13, DEAD box protein 50, Gu-beta, Nucleolar protein Gu2	-2.34954	-2.46488	-0.0187215	0.957808	0.1-1.0%
CL0221	RRM	3	125	8.11319	O75821	EIF3G	Eukaryotic translation initiation factor 3 subunit G, eIF3g, Eukaryotic translation initiation factor 3 RNA-binding subunit, eIF-3 RNA-binding subunit, Eukaryotic translation initiation factor 3 subunit 4, eIF-3-delta, eIF3 p42, eIF3 p44	-1.50983	-1.61442	-0.0248558	0.944374	0.1-1.0%		CL0221	RRM	3	125	8.11319	O75821	EIF3G	Eukaryotic translation initiation factor 3 subunit G, eIF3g, Eukaryotic translation initiation factor 3 RNA-binding subunit, eIF-3 RNA-binding subunit, Eukaryotic translation initiation factor 3 subunit 4, eIF-3-delta, eIF3 p42, eIF3 p44	-1.50983	-1.61442	-0.0248558	0.944374	0.1-1.0%
CL0221	RRM	3	125	8.11319	Q9BZI7	UPF3B	Regulator of nonsense transcripts 3B, Nonsense mRNA reducing factor 3B, Up-frameshift suppressor 3 homolog B, hUpf3B, Up-frameshift suppressor 3 homolog on chromosome X, hUpf3p-X	-3.13127	-3.27086	-0.0275123	0.938616	0.1-1.0%		CL0221	RRM	3	125	8.11319	Q9BZI7	UPF3B	Regulator of nonsense transcripts 3B, Nonsense mRNA reducing factor 3B, Up-frameshift suppressor 3 homolog B, hUpf3B, Up-frameshift suppressor 3 homolog on chromosome X, hUpf3p-X	-3.13127	-3.27086	-0.0275123	0.938616	0.1-1.0%
CL0221	RRM	3	125	8.11319	Q9UBU9	NXF1	Nuclear RNA export factor 1, Tip-associated protein, Tip-associating protein, mRNA export factor TAP	-2.411	-2.57052	-0.0797494	0.832244	0.1-1.0%		CL0221	RRM	3	125	8.11319	Q9UBU9	NXF1	Nuclear RNA export factor 1, Tip-associated protein, Tip-associating protein, mRNA export factor TAP	-2.411	-2.57052	-0.0797494	0.832244	0.1-1.0%
CL0221	RRM	3	125	8.11319	Q01081	U2AF1	Splicing factor U2AF 35 kDa subunit, U2 auxiliary factor 35 kDa subunit, U2 small nuclear RNA auxiliary factor 1, U2 snRNP auxiliary factor small subunit	-1.84465	-2.02436	-0.11132	0.773891	0.1-1.0%		CL0221	RRM	3	125	8.11319	Q01081	U2AF1	Splicing factor U2AF 35 kDa subunit, U2 auxiliary factor 35 kDa subunit, U2 small nuclear RNA auxiliary factor 1, U2 snRNP auxiliary factor small subunit	-1.84465	-2.02436	-0.11132	0.773891	0.1-1.0%
CL0221	RRM	3	125	8.11319	Q9NVV4	MTPAP	Poly(A) RNA polymerase, mitochondrial, PAP, 2.7.7.19, PAP-associated domain-containing protein 1, Polynucleotide adenylyltransferase, Terminal uridylyltransferase 1, TUTase 1, mtPAP	-2.40983	-2.58748	-0.167165	0.680511	0.1-1.0%		CL0221	RRM	3	125	8.11319	Q9NVV4	MTPAP	Poly(A) RNA polymerase, mitochondrial, PAP, 2.7.7.19, PAP-associated domain-containing protein 1, Polynucleotide adenylyltransferase, Terminal uridylyltransferase 1, TUTase 1, mtPAP	-2.40983	-2.58748	-0.167165	0.680511	0.1-1.0%
CL0221	RRM	3	125	8.11319	P42696	RBM34	RNA-binding protein 34, RNA-binding motif protein 34	-1.83438	-1.67256	-0.273225	0.533059	0.1-1.0%		CL0221	RRM	3	125	8.11319	P42696	RBM34	RNA-binding protein 34, RNA-binding motif protein 34	-1.83438	-1.67256	-0.273225	0.533059	0.1-1.0%
CL0221	RRM	3	125	8.11319	O15042	U2SURP	U2 snRNP-associated SURP motif-containing protein, 140 kDa Ser/Arg-rich domain protein, U2-associated protein SR140	-0.935893	-1.28095	-0.279366	0.525574	0.1-1.0%		CL0221	RRM	3	125	8.11319	O15042	U2SURP	U2 snRNP-associated SURP motif-containing protein, 140 kDa Ser/Arg-rich domain protein, U2-associated protein SR140	-0.935893	-1.28095	-0.279366	0.525574	0.1-1.0%
CL0221	RRM	3	125	8.11319	P09012	SNRPA	U1 small nuclear ribonucleoprotein A, U1 snRNP A, U1-A, U1A	-1.55879	-2.0112	-0.34904	0.447672	0.1-1.0%		CL0221	RRM	3	125	8.11319	P09012	SNRPA	U1 small nuclear ribonucleoprotein A, U1 snRNP A, U1-A, U1A	-1.55879	-2.0112	-0.34904	0.447672	0.1-1.0%
CL0221	RRM	3	125	8.11319	Q15287	RNPS1	RNA-binding protein with serine-rich domain 1, SR-related protein LDC2	-1.98974	-2.07608	-0.390384	0.40702	0.1-1.0%		CL0221	RRM	3	125	8.11319	Q15287	RNPS1	RNA-binding protein with serine-rich domain 1, SR-related protein LDC2	-1.98974	-2.07608	-0.390384	0.40702	0.1-1.0%
CL0221	RRM	3	125	8.11319	Q8N684	CPSF7	Cleavage and polyadenylation specificity factor subunit 7, Cleavage and polyadenylation specificity factor 59 kDa subunit, CPSF 59 kDa subunit, Cleavage factor Im complex 59 kDa subunit, CFIm59, Pre-mRNA cleavage factor Im 59 kDa subunit	-1.99189	-2.54104	-0.533656	0.292647	0.1-1.0%		CL0221	RRM	3	125	8.11319	Q8N684	CPSF7	Cleavage and polyadenylation specificity factor subunit 7, Cleavage and polyadenylation specificity factor 59 kDa subunit, CPSF 59 kDa subunit, Cleavage factor Im complex 59 kDa subunit, CFIm59, Pre-mRNA cleavage factor Im 59 kDa subunit	-1.99189	-2.54104	-0.533656	0.292647	0.1-1.0%
CL0221	RRM	3	125	8.11319	P49756	RBM25	RNA-binding protein 25, Arg/Glu/Asp-rich protein of 120 kDa, RED120, Protein S164, RNA-binding motif protein 25, RNA-binding region-containing protein 7	-2.20903	-2.72653	-0.580535	0.262703	0.1-1.0%		CL0221	RRM	3	125	8.11319	P49756	RBM25	RNA-binding protein 25, Arg/Glu/Asp-rich protein of 120 kDa, RED120, Protein S164, RNA-binding motif protein 25, RNA-binding region-containing protein 7	-2.20903	-2.72653	-0.580535	0.262703	0.1-1.0%
CL0221	RRM	3	125	8.11319	P08579	SNRPB2	U2 small nuclear ribonucleoprotein B'', U2 snRNP B''	-1.87876	-2.76275	-1.05901	0.0872948	0.01-0.1%		CL0221	RRM	3	125	8.11319	P08579	SNRPB2	U2 small nuclear ribonucleoprotein B'', U2 snRNP B''	-1.87876	-2.76275	-1.05901	0.0872948	0.01-0.1%
CL0221	RRM	3	125	8.11319	O43719	HTATSF1	HIV Tat-specific factor 1, Tat-SF1	-2.38235	-3.10891	-1.13734	0.0728885	0.01-0.1%		CL0221	RRM	3	125	8.11319	O43719	HTATSF1	HIV Tat-specific factor 1, Tat-SF1	-2.38235	-3.10891	-1.13734	0.0728885	0.01-0.1%
CL0221	RRM	3	125	8.11319	P55884	EIF3B	Eukaryotic translation initiation factor 3 subunit B, eIF3b, Eukaryotic translation initiation factor 3 subunit 9, Prt1 homolog, hPrt1, eIF-3-eta, eIF3 p110, eIF3 p116	-1.31779	-2.58367	-1.30544	0.0494945	0.01-0.1%		CL0221	RRM	3	125	8.11319	P55884	EIF3B	Eukaryotic translation initiation factor 3 subunit B, eIF3b, Eukaryotic translation initiation factor 3 subunit 9, Prt1 homolog, hPrt1, eIF-3-eta, eIF3 p110, eIF3 p116	-1.31779	-2.58367	-1.30544	0.0494945	0.01-0.1%
CL0007	KH	4	22	6.66133	Q92945	KHSRP	Far upstream element-binding protein 2, FUSE-binding protein 2, KH type-splicing regulatory protein, KSRP, p75	-1.15931	0.297327	1.54217	34.8476	>10.0%		CL0007	KH	4	22	6.66133	Q92945	KHSRP	Far upstream element-binding protein 2, FUSE-binding protein 2, KH type-splicing regulatory protein, KSRP, p75	-1.15931	0.297327	1.54217	34.8476	>10.0%
CL0007	KH	4	22	6.66133	Q96I24	FUBP3	Far upstream element-binding protein 3, FUSE-binding protein 3	-1.39617	-0.0835399	1.43061	26.953	>10.0%		CL0007	KH	4	22	6.66133	Q96I24	FUBP3	Far upstream element-binding protein 3, FUSE-binding protein 3	-1.39617	-0.0835399	1.43061	26.953	>10.0%
CL0007	KH	4	22	6.66133	Q9Y6M1	IGF2BP2	Insulin-like growth factor 2 mRNA-binding protein 2, IGF2 mRNA-binding protein 2, IMP-2, Hepatocellular carcinoma autoantigen p62, IGF-II mRNA-binding protein 2, VICKZ family member 2	-3.62519	-2.61797	1.10975	12.8749	>10.0%		CL0007	KH	4	22	6.66133	Q9Y6M1	IGF2BP2	Insulin-like growth factor 2 mRNA-binding protein 2, IGF2 mRNA-binding protein 2, IMP-2, Hepatocellular carcinoma autoantigen p62, IGF-II mRNA-binding protein 2, VICKZ family member 2	-3.62519	-2.61797	1.10975	12.8749	>10.0%
CL0007	KH	4	22	6.66133	O75179	ANKRD17	Ankyrin repeat domain-containing protein 17, Gene trap ankyrin repeat protein, Serologically defined breast cancer antigen NY-BR-16	-2.36132	-1.56498	0.892302	7.80372	1.0-10.0%		CL0007	KH	4	22	6.66133	O75179	ANKRD17	Ankyrin repeat domain-containing protein 17, Gene trap ankyrin repeat protein, Serologically defined breast cancer antigen NY-BR-16	-2.36132	-1.56498	0.892302	7.80372	1.0-10.0%
CL0007	KH	4	22	6.66133	Q9NZI8	IGF2BP1	Insulin-like growth factor 2 mRNA-binding protein 1, IGF2 mRNA-binding protein 1, IMP-1, IMP1, Coding region determinant-binding protein, CRD-BP, IGF-II mRNA-binding protein 1, VICKZ family member 1, Zipcode-binding protein 1, ZBP-1	-1.5014	-0.722219	0.853034	7.12909	1.0-10.0%		CL0007	KH	4	22	6.66133	Q9NZI8	IGF2BP1	Insulin-like growth factor 2 mRNA-binding protein 1, IGF2 mRNA-binding protein 1, IMP-1, IMP1, Coding region determinant-binding protein, CRD-BP, IGF-II mRNA-binding protein 1, VICKZ family member 1, Zipcode-binding protein 1, ZBP-1	-1.5014	-0.722219	0.853034	7.12909	1.0-10.0%
CL0007	KH	4	22	6.66133	Q07666	KHDRBS1	KH domain-containing, RNA-binding, signal transduction-associated protein 1, GAP-associated tyrosine phosphoprotein p62, Src-associated in mitosis 68 kDa protein, Sam68, p21 Ras GTPase-activating protein-associated p62, p68	-1.48836	-0.787603	0.823197	6.65575	1.0-10.0%		CL0007	KH	4	22	6.66133	Q07666	KHDRBS1	KH domain-containing, RNA-binding, signal transduction-associated protein 1, GAP-associated tyrosine phosphoprotein p62, Src-associated in mitosis 68 kDa protein, Sam68, p21 Ras GTPase-activating protein-associated p62, p68	-1.48836	-0.787603	0.823197	6.65575	1.0-10.0%
CL0007	KH	4	22	6.66133	Q96AE4	FUBP1	Far upstream element-binding protein 1, FBP, FUSE-binding protein 1, DNA helicase V, hDH V	-1.20739	-0.521813	0.786686	6.11908	1.0-10.0%		CL0007	KH	4	22	6.66133	Q96AE4	FUBP1	Far upstream element-binding protein 1, FBP, FUSE-binding protein 1, DNA helicase V, hDH V	-1.20739	-0.521813	0.786686	6.11908	1.0-10.0%
CL0007	KH	4	22	6.66133	Q96PU8	QKI	KH domain-containing RNA-binding protein QKI, Protein quaking, Hqk, HqkI	-3.21255	-2.77331	0.720968	5.25979	1.0-10.0%		CL0007	KH	4	22	6.66133	Q96PU8	QKI	KH domain-containing RNA-binding protein QKI, Protein quaking, Hqk, HqkI	-3.21255	-2.77331	0.720968	5.25979	1.0-10.0%
CL0007	KH	4	22	6.66133	Q15365	PCBP1	Poly(rC)-binding protein 1, Alpha-CP1, Heterogeneous nuclear ribonucleoprotein E1, hnRNP E1, Nucleic acid-binding protein SUB2.3	-0.916993	-0.315634	0.692985	4.93157	1.0-10.0%		CL0007	KH	4	22	6.66133	Q15365	PCBP1	Poly(rC)-binding protein 1, Alpha-CP1, Heterogeneous nuclear ribonucleoprotein E1, hnRNP E1, Nucleic acid-binding protein SUB2.3	-0.916993	-0.315634	0.692985	4.93157	1.0-10.0%
CL0007	KH	4	22	6.66133	O00425	IGF2BP3	Insulin-like growth factor 2 mRNA-binding protein 3, IGF2 mRNA-binding protein 3, IMP-3, IGF-II mRNA-binding protein 3, KH domain-containing protein overexpressed in cancer, hKOC, VICKZ family member 3	-1.69388	-1.09064	0.674081	4.72151	1.0-10.0%		CL0007	KH	4	22	6.66133	O00425	IGF2BP3	Insulin-like growth factor 2 mRNA-binding protein 3, IGF2 mRNA-binding protein 3, IMP-3, IGF-II mRNA-binding protein 3, KH domain-containing protein overexpressed in cancer, hKOC, VICKZ family member 3	-1.69388	-1.09064	0.674081	4.72151	1.0-10.0%
CL0007	KH	4	22	6.66133	P61978	HNRNPK	Heterogeneous nuclear ribonucleoprotein K, hnRNP K, Transformation up-regulated nuclear protein, TUNP	-0.643124	-0.0915099	0.653256	4.50046	1.0-10.0%		CL0007	KH	4	22	6.66133	P61978	HNRNPK	Heterogeneous nuclear ribonucleoprotein K, hnRNP K, Transformation up-regulated nuclear protein, TUNP	-0.643124	-0.0915099	0.653256	4.50046	1.0-10.0%
CL0007	KH	4	22	6.66133	P51116	FXR2	RNA-binding protein FXR2, FXR2P, FMR1 autosomal homolog 2	-2.26367	-1.8056	0.569439	3.71056	1.0-10.0%		CL0007	KH	4	22	6.66133	P51116	FXR2	RNA-binding protein FXR2, FXR2P, FMR1 autosomal homolog 2	-2.26367	-1.8056	0.569439	3.71056	1.0-10.0%
CL0007	KH	4	22	6.66133	Q00341	HDLBP	Vigilin, High density lipoprotein-binding protein, HDL-binding protein	-1.2574	-0.810646	0.52681	3.36365	1.0-10.0%		CL0007	KH	4	22	6.66133	Q00341	HDLBP	Vigilin, High density lipoprotein-binding protein, HDL-binding protein	-1.2574	-0.810646	0.52681	3.36365	1.0-10.0%
CL0007	KH	4	22	6.66133	Q15366	PCBP2	Poly(rC)-binding protein 2, Alpha-CP2, Heterogeneous nuclear ribonucleoprotein E2, hnRNP E2	-1.34362	-0.941294	0.499513	3.15874	1.0-10.0%		CL0007	KH	4	22	6.66133	Q15366	PCBP2	Poly(rC)-binding protein 2, Alpha-CP2, Heterogeneous nuclear ribonucleoprotein E2, hnRNP E2	-1.34362	-0.941294	0.499513	3.15874	1.0-10.0%
CL0007	KH	4	22	6.66133	Q8IWZ3	ANKHD1	Ankyrin repeat and KH domain-containing protein 1, HIV-1 Vpr-binding ankyrin repeat protein, Multiple ankyrin repeats single KH domain, hMASK	-2.60815	-2.22025	0.483137	3.04184	1.0-10.0%		CL0007	KH	4	22	6.66133	Q8IWZ3	ANKHD1	Ankyrin repeat and KH domain-containing protein 1, HIV-1 Vpr-binding ankyrin repeat protein, Multiple ankyrin repeats single KH domain, hMASK	-2.60815	-2.22025	0.483137	3.04184	1.0-10.0%
CL0007	KH	4	22	6.66133	Q15637	SF1	Splicing factor 1, Mammalian branch point-binding protein, BBP, mBBP, Transcription factor ZFM1, Zinc finger gene in MEN1 locus, Zinc finger protein 162	-1.86364	-1.47674	0.468719	2.94252	1.0-10.0%		CL0007	KH	4	22	6.66133	Q15637	SF1	Splicing factor 1, Mammalian branch point-binding protein, BBP, mBBP, Transcription factor ZFM1, Zinc finger gene in MEN1 locus, Zinc finger protein 162	-1.86364	-1.47674	0.468719	2.94252	1.0-10.0%
CL0007	KH	4	22	6.66133	Q92667	AKAP1	A-kinase anchor protein 1, mitochondrial, A-kinase anchor protein 149 kDa, AKAP 149, Dual specificity A-kinase-anchoring protein 1, D-AKAP-1, Protein kinase A-anchoring protein 1, PRKA1, Spermatid A-kinase anchor protein 84, S-AKAP84	-3.27528	-2.975	0.445428	2.78887	1.0-10.0%		CL0007	KH	4	22	6.66133	Q92667	AKAP1	A-kinase anchor protein 1, mitochondrial, A-kinase anchor protein 149 kDa, AKAP 149, Dual specificity A-kinase-anchoring protein 1, D-AKAP-1, Protein kinase A-anchoring protein 1, PRKA1, Spermatid A-kinase anchor protein 84, S-AKAP84	-3.27528	-2.975	0.445428	2.78887	1.0-10.0%
CL0007	KH	4	22	6.66133	P51114	FXR1	RNA-binding protein FXR1, FMR1 autosomal homolog 1, hFXR1p	-1.64204	-1.3505	0.389742	2.45325	1.0-10.0%		CL0007	KH	4	22	6.66133	P51114	FXR1	RNA-binding protein FXR1, FMR1 autosomal homolog 1, hFXR1p	-1.64204	-1.3505	0.389742	2.45325	1.0-10.0%
CL0007	KH	4	22	6.66133	Q13601	KRR1	KRR1 small subunit processome component homolog, HIV-1 Rev-binding protein 2, KRR-R motif-containing protein 1, Rev-interacting protein 1, Rip-1	-2.19118	-2.1216	0.0884293	1.22583	1.0-10.0%		CL0007	KH	4	22	6.66133	Q13601	KRR1	KRR1 small subunit processome component homolog, HIV-1 Rev-binding protein 2, KRR-R motif-containing protein 1, Rev-interacting protein 1, Rip-1	-2.19118	-2.1216	0.0884293	1.22583	1.0-10.0%
CL0007	KH	4	22	6.66133	P23396	RPS3	40S ribosomal protein S3, 4.2.99.18, Small ribosomal subunit protein uS3	-0.43014	-0.446619	0.0749479	1.18836	1.0-10.0%		CL0007	KH	4	22	6.66133	P23396	RPS3	40S ribosomal protein S3, 4.2.99.18, Small ribosomal subunit protein uS3	-0.43014	-0.446619	0.0749479	1.18836	1.0-10.0%
CL0007	KH	4	22	6.66133	Q06787	FMR1	Fragile X messenger ribonucleoprotein 1, Fragile X messenger ribonucleoprotein, FMRP, Protein FMR-1	-2.4986	-1.97579	-0.0900303	0.812774	0.1-1.0%		CL0007	KH	4	22	6.66133	Q06787	FMR1	Fragile X messenger ribonucleoprotein 1, Fragile X messenger ribonucleoprotein, FMRP, Protein FMR-1	-2.4986	-1.97579	-0.0900303	0.812774	0.1-1.0%
CL0007	KH	4	22	6.66133	Q8TCS8	PNPT1	Polyribonucleotide nucleotidyltransferase 1, mitochondrial, 2.7.7.8, 3'-5' RNA exonuclease OLD35, PNPase old-35, Polynucleotide phosphorylase 1, PNPase 1, Polynucleotide phosphorylase-like protein	-1.69475	-2.89598	-1.1783	0.0663282	0.01-0.1%		CL0007	KH	4	22	6.66133	Q8TCS8	PNPT1	Polyribonucleotide nucleotidyltransferase 1, mitochondrial, 2.7.7.8, 3'-5' RNA exonuclease OLD35, PNPase old-35, Polynucleotide phosphorylase 1, PNPase 1, Polynucleotide phosphorylase-like protein	-1.69475	-2.89598	-1.1783	0.0663282	0.01-0.1%
CL0511	Retroviral_zf	5	10	6.28609	Q9BQ04	RBM4B	RNA-binding protein 4B, RNA-binding motif protein 30, RNA-binding motif protein 4B, RNA-binding protein 30	-3.6319	-2.50393	1.40335	25.3135	>10.0%		CL0511	Retroviral_zf	5	10	6.28609	Q9BQ04	RBM4B	RNA-binding protein 4B, RNA-binding motif protein 30, RNA-binding motif protein 4B, RNA-binding protein 30	-3.6319	-2.50393	1.40335	25.3135	>10.0%
CL0511	Retroviral_zf	5	10	6.28609	Q8N3Z6	ZCCHC7	Zinc finger CCHC domain-containing protein 7, TRAMP-like complex RNA-binding factor ZCCHC7	-3.55887	-2.70148	0.964756	9.22052	1.0-10.0%		CL0511	Retroviral_zf	5	10	6.28609	Q8N3Z6	ZCCHC7	Zinc finger CCHC domain-containing protein 7, TRAMP-like complex RNA-binding factor ZCCHC7	-3.55887	-2.70148	0.964756	9.22052	1.0-10.0%
CL0511	Retroviral_zf	5	10	6.28609	Q9BWF3	RBM4	RNA-binding protein 4, Lark homolog, hLark, RNA-binding motif protein 4, RNA-binding motif protein 4a	-1.85741	-1.04653	0.822567	6.6461	1.0-10.0%		CL0511	Retroviral_zf	5	10	6.28609	Q9BWF3	RBM4	RNA-binding protein 4, Lark homolog, hLark, RNA-binding motif protein 4, RNA-binding motif protein 4a	-1.85741	-1.04653	0.822567	6.6461	1.0-10.0%
CL0511	Retroviral_zf	5	10	6.28609	Q5VYS8	TUT7	Terminal uridylyltransferase 7, TUTase 7, 2.7.7.52, Zinc finger CCHC domain-containing protein 6	-2.77123	-2.05659	0.798184	6.28325	1.0-10.0%		CL0511	Retroviral_zf	5	10	6.28609	Q5VYS8	TUT7	Terminal uridylyltransferase 7, TUTase 7, 2.7.7.52, Zinc finger CCHC domain-containing protein 6	-2.77123	-2.05659	0.798184	6.28325	1.0-10.0%
CL0511	Retroviral_zf	5	10	6.28609	Q6NZY4	ZCCHC8	Zinc finger CCHC domain-containing protein 8, TRAMP-like complex RNA-binding factor ZCCHC8	-3.39835	-2.69784	0.780578	6.03362	1.0-10.0%		CL0511	Retroviral_zf	5	10	6.28609	Q6NZY4	ZCCHC8	Zinc finger CCHC domain-containing protein 8, TRAMP-like complex RNA-binding factor ZCCHC8	-3.39835	-2.69784	0.780578	6.03362	1.0-10.0%
CL0511	Retroviral_zf	5	10	6.28609	Q15637	SF1	Splicing factor 1, Mammalian branch point-binding protein, BBP, mBBP, Transcription factor ZFM1, Zinc finger gene in MEN1 locus, Zinc finger protein 162	-1.86364	-1.47674	0.468719	2.94252	1.0-10.0%		CL0511	Retroviral_zf	5	10	6.28609	Q15637	SF1	Splicing factor 1, Mammalian branch point-binding protein, BBP, mBBP, Transcription factor ZFM1, Zinc finger gene in MEN1 locus, Zinc finger protein 162	-1.86364	-1.47674	0.468719	2.94252	1.0-10.0%
CL0511	Retroviral_zf	5	10	6.28609	P62633	CNBP	CCHC-type zinc finger nucleic acid binding protein, Cellular nucleic acid-binding protein, CNBP, Zinc finger protein 9	-1.60083	-1.32789	0.363411	2.30893	1.0-10.0%		CL0511	Retroviral_zf	5	10	6.28609	P62633	CNBP	CCHC-type zinc finger nucleic acid binding protein, Cellular nucleic acid-binding protein, CNBP, Zinc finger protein 9	-1.60083	-1.32789	0.363411	2.30893	1.0-10.0%
CL0511	Retroviral_zf	5	10	6.28609	Q8TBF4	ZCRB1	Zinc finger CCHC-type and RNA-binding motif-containing protein 1, U11/U12 small nuclear ribonucleoprotein 31 kDa protein, U11/U12 snRNP 31 kDa protein, U11/U12-31K	-2.73518	-2.50696	0.304285	2.01505	1.0-10.0%		CL0511	Retroviral_zf	5	10	6.28609	Q8TBF4	ZCRB1	Zinc finger CCHC-type and RNA-binding motif-containing protein 1, U11/U12 small nuclear ribonucleoprotein 31 kDa protein, U11/U12 snRNP 31 kDa protein, U11/U12-31K	-2.73518	-2.50696	0.304285	2.01505	1.0-10.0%
CL0511	Retroviral_zf	5	10	6.28609	Q7Z6E9	RBBP6	E3 ubiquitin-protein ligase RBBP6, 2.3.2.27, Proliferation potential-related protein, Protein P2P-R, RING-type E3 ubiquitin transferase RBBP6, Retinoblastoma-binding Q protein 1, RBQ-1, Retinoblastoma-binding protein 6, p53-associated cellular protein of testis	-2.51264	-2.51925	0.0618295	1.153	1.0-10.0%		CL0511	Retroviral_zf	5	10	6.28609	Q7Z6E9	RBBP6	E3 ubiquitin-protein ligase RBBP6, 2.3.2.27, Proliferation potential-related protein, Protein P2P-R, RING-type E3 ubiquitin transferase RBBP6, Retinoblastoma-binding Q protein 1, RBQ-1, Retinoblastoma-binding protein 6, p53-associated cellular protein of testis	-2.51264	-2.51925	0.0618295	1.153	1.0-10.0%
CL0511	Retroviral_zf	5	10	6.28609	O75821	EIF3G	Eukaryotic translation initiation factor 3 subunit G, eIF3g, Eukaryotic translation initiation factor 3 RNA-binding subunit, eIF-3 RNA-binding subunit, Eukaryotic translation initiation factor 3 subunit 4, eIF-3-delta, eIF3 p42, eIF3 p44	-1.50983	-1.61442	-0.0248558	0.944374	0.1-1.0%		CL0511	Retroviral_zf	5	10	6.28609	O75821	EIF3G	Eukaryotic translation initiation factor 3 subunit G, eIF3g, Eukaryotic translation initiation factor 3 RNA-binding subunit, eIF-3 RNA-binding subunit, Eukaryotic translation initiation factor 3 subunit 4, eIF-3-delta, eIF3 p42, eIF3 p44	-1.50983	-1.61442	-0.0248558	0.944374	0.1-1.0%
CL0449	G-PATCH	6	7	6.2491	P52756	RBM5	RNA-binding protein 5, Protein G15, Putative tumor suppressor LUCA15, RNA-binding motif protein 5, Renal carcinoma antigen NY-REN-9	-2.89429	-1.77427	1.2155	16.4249	>10.0%		CL0449	G-PATCH	6	7	6.2491	P52756	RBM5	RNA-binding protein 5, Protein G15, Putative tumor suppressor LUCA15, RNA-binding motif protein 5, Renal carcinoma antigen NY-REN-9	-2.89429	-1.77427	1.2155	16.4249	>10.0%
CL0449	G-PATCH	6	7	6.2491	P78332	RBM6	RNA-binding protein 6, Lung cancer antigen NY-LU-12, Protein G16, RNA-binding motif protein 6, RNA-binding protein DEF-3	-2.57214	-1.62637	1.03885	10.9357	>10.0%		CL0449	G-PATCH	6	7	6.2491	P78332	RBM6	RNA-binding protein 6, Lung cancer antigen NY-LU-12, Protein G16, RNA-binding motif protein 6, RNA-binding protein DEF-3	-2.57214	-1.62637	1.03885	10.9357	>10.0%
CL0449	G-PATCH	6	7	6.2491	P98175	RBM10	RNA-binding protein 10, G patch domain-containing protein 9, RNA-binding motif protein 10, RNA-binding protein S1-1, S1-1	-2.11429	-1.37955	0.804448	6.37453	1.0-10.0%		CL0449	G-PATCH	6	7	6.2491	P98175	RBM10	RNA-binding protein 10, G patch domain-containing protein 9, RNA-binding motif protein 10, RNA-binding protein S1-1, S1-1	-2.11429	-1.37955	0.804448	6.37453	1.0-10.0%
CL0449	G-PATCH	6	7	6.2491	Q8IX01	SUGP2	SURP and G-patch domain-containing protein 2, Arginine/serine-rich-splicing factor 14, Splicing factor, arginine/serine-rich 14	-2.12519	-1.54314	0.673874	4.71926	1.0-10.0%		CL0449	G-PATCH	6	7	6.2491	Q8IX01	SUGP2	SURP and G-patch domain-containing protein 2, Arginine/serine-rich-splicing factor 14, Splicing factor, arginine/serine-rich 14	-2.12519	-1.54314	0.673874	4.71926	1.0-10.0%
CL0449	G-PATCH	6	7	6.2491	O15226	NKRF	NF-kappa-B-repressing factor, NFkB-repressing factor, NRF, Protein ITBA4	-1.89998	-1.50712	0.447828	2.80432	1.0-10.0%		CL0449	G-PATCH	6	7	6.2491	O15226	NKRF	NF-kappa-B-repressing factor, NFkB-repressing factor, NRF, Protein ITBA4	-1.89998	-1.50712	0.447828	2.80432	1.0-10.0%
CL0449	G-PATCH	6	7	6.2491	P18583	SON	Protein SON, Bax antagonist selected in saccharomyces 1, BASS1, Negative regulatory element-binding protein, NRE-binding protein, Protein DBP-5, SON3	-1.9312	-1.66417	0.183454	1.52565	1.0-10.0%		CL0449	G-PATCH	6	7	6.2491	P18583	SON	Protein SON, Bax antagonist selected in saccharomyces 1, BASS1, Negative regulatory element-binding protein, NRE-binding protein, Protein DBP-5, SON3	-1.9312	-1.66417	0.183454	1.52565	1.0-10.0%
CL0449	G-PATCH	6	7	6.2491	Q8IWX8	CHERP	Calcium homeostasis endoplasmic reticulum protein, ERPROT 213-21, SR-related CTD-associated factor 6	-1.72038	-1.80736	-0.0180408	0.959311	0.1-1.0%		CL0449	G-PATCH	6	7	6.2491	Q8IWX8	CHERP	Calcium homeostasis endoplasmic reticulum protein, ERPROT 213-21, SR-related CTD-associated factor 6	-1.72038	-1.80736	-0.0180408	0.959311	0.1-1.0%
CL0084	ADP-ribosyl	7	3	5.04681	Q9H0J9	PARP12	Protein mono-ADP-ribosyltransferase PARP12, 2.4.2.-, ADP-ribosyltransferase diphtheria toxin-like 12, ARTD12, Poly [ADP-ribose] polymerase 12, PARP-12, Zinc finger CCCH domain-containing protein 1	-2.50939	-1.64589	0.9239	8.39266	1.0-10.0%		CL0084	ADP-ribosyl	7	3	5.04681	Q9H0J9	PARP12	Protein mono-ADP-ribosyltransferase PARP12, 2.4.2.-, ADP-ribosyltransferase diphtheria toxin-like 12, ARTD12, Poly [ADP-ribose] polymerase 12, PARP-12, Zinc finger CCCH domain-containing protein 1	-2.50939	-1.64589	0.9239	8.39266	1.0-10.0%
CL0084	ADP-ribosyl	7	3	5.04681	Q7Z2W4	ZC3HAV1	Zinc finger CCCH-type antiviral protein 1, ADP-ribosyltransferase diphtheria toxin-like 13, ARTD13, Inactive Poly [ADP-ribose] polymerase 13, PARP13, Zinc finger CCCH domain-containing protein 2, Zinc finger antiviral protein, ZAP	-1.53752	-0.790168	0.815811	6.54351	1.0-10.0%		CL0084	ADP-ribosyl	7	3	5.04681	Q7Z2W4	ZC3HAV1	Zinc finger CCCH-type antiviral protein 1, ADP-ribosyltransferase diphtheria toxin-like 13, ARTD13, Inactive Poly [ADP-ribose] polymerase 13, PARP13, Zinc finger CCCH domain-containing protein 2, Zinc finger antiviral protein, ZAP	-1.53752	-0.790168	0.815811	6.54351	1.0-10.0%
CL0084	ADP-ribosyl	7	3	5.04681	P09874	PARP1	Poly [ADP-ribose] polymerase, 2.4.2.30	-1.07903	-1.78142	-0.689837	0.20425	0.1-1.0%		CL0084	ADP-ribosyl	7	3	5.04681	P09874	PARP1	Poly [ADP-ribose] polymerase, 2.4.2.30	-1.07903	-1.78142	-0.689837	0.20425	0.1-1.0%
CL0441	AlbA	8	2	4.91588	Q9BUL9	RPP25	Ribonuclease P protein subunit p25, RNase P protein subunit p25	-3.15669	-2.55885	0.697002	4.97739	1.0-10.0%		CL0196	DSRM	8	13	4.1599	P15880	RPS2	40S ribosomal protein S2, 40S ribosomal protein S4, Protein LLRep3, Small ribosomal subunit protein uS5	-0.497922	0.641294	1.25139	17.8397	>10.0%
CL0441	AlbA	8	2	4.91588	Q8N5L8	RPP25L	Ribonuclease P protein subunit p25-like protein, RNase P protein subunit-like p25, Rpp25-like protein	-2.86237	-2.30657	0.686132	4.85436	1.0-10.0%		CL0196	DSRM	8	13	4.1599	Q9NS39	ADARB2	Double-stranded RNA-specific editase B2, 3.5.-.-, RNA-dependent adenosine deaminase 3, RNA-editing deaminase 2, RNA-editing enzyme 2, dsRNA adenosine deaminase B2	-4.29138	-3.5759	0.798711	6.29088	1.0-10.0%
CL0609	sPC4_like	9	2	4.68858	Q00577	PURA	Transcriptional activator protein Pur-alpha, Purine-rich single-stranded DNA-binding protein alpha	-2.34573	-1.58942	0.865046	7.32902	1.0-10.0%		CL0196	DSRM	8	13	4.1599	Q9NUL3	STAU2	Double-stranded RNA-binding protein Staufen homolog 2	-2.65962	-1.93303	0.798302	6.28495	1.0-10.0%
CL0609	sPC4_like	9	2	4.68858	Q96QR8	PURB	Transcriptional activator protein Pur-beta, Purine-rich element-binding protein B	-2.28767	-2.06559	0.311361	2.04815	1.0-10.0%		CL0196	DSRM	8	13	4.1599	Q08211	DHX9	ATP-dependent RNA helicase A, 3.6.4.13, DEAH box protein 9, DExH-box helicase 9, Leukophysin, LKP, Nuclear DNA helicase II, NDH II, RNA helicase A	-0.753926	-0.197232	0.643424	4.39971	1.0-10.0%
CL0196	DSRM	10	13	4.1599	P15880	RPS2	40S ribosomal protein S2, 40S ribosomal protein S4, Protein LLRep3, Small ribosomal subunit protein uS5	-0.497922	0.641294	1.25139	17.8397	>10.0%		CL0196	DSRM	8	13	4.1599	Q9UPY3	DICER1	Endoribonuclease Dicer, 3.1.26.3, Helicase with RNase motif, Helicase MOI	-3.6189	-3.14511	0.570013	3.71546	1.0-10.0%
CL0196	DSRM	10	13	4.1599	Q9NS39	ADARB2	Double-stranded RNA-specific editase B2, 3.5.-.-, RNA-dependent adenosine deaminase 3, RNA-editing deaminase 2, RNA-editing enzyme 2, dsRNA adenosine deaminase B2	-4.29138	-3.5759	0.798711	6.29088	1.0-10.0%		CL0196	DSRM	8	13	4.1599	Q96SI9	STRBP	Spermatid perinuclear RNA-binding protein	-2.4453	-1.97	0.547319	3.5263	1.0-10.0%
CL0196	DSRM	10	13	4.1599	Q9NUL3	STAU2	Double-stranded RNA-binding protein Staufen homolog 2	-2.65962	-1.93303	0.798302	6.28495	1.0-10.0%		CL0196	DSRM	8	13	4.1599	Q12906	ILF3	Interleukin enhancer-binding factor 3, Double-stranded RNA-binding protein 76, DRBP76, M-phase phosphoprotein 4, MPP4, Nuclear factor associated with dsRNA, NFAR, Nuclear factor of activated T-cells 90 kDa, NF-AT-90, Translational control protein 80, TCP80	-1.04459	-0.556161	0.532705	3.40961	1.0-10.0%
CL0196	DSRM	10	13	4.1599	Q08211	DHX9	ATP-dependent RNA helicase A, 3.6.4.13, DEAH box protein 9, DExH-box helicase 9, Leukophysin, LKP, Nuclear DNA helicase II, NDH II, RNA helicase A	-0.753926	-0.197232	0.643424	4.39971	1.0-10.0%		CL0196	DSRM	8	13	4.1599	P55265	ADAR	Double-stranded RNA-specific adenosine deaminase, DRADA, 3.5.4.37, 136 kDa double-stranded RNA-binding protein, p136, Interferon-inducible protein 4, IFI-4, K88DSRBP	-1.47793	-1.32702	0.228179	1.69114	1.0-10.0%
CL0196	DSRM	10	13	4.1599	Q9UPY3	DICER1	Endoribonuclease Dicer, 3.1.26.3, Helicase with RNase motif, Helicase MOI	-3.6189	-3.14511	0.570013	3.71546	1.0-10.0%		CL0196	DSRM	8	13	4.1599	O95793	STAU1	Double-stranded RNA-binding protein Staufen homolog 1	-3.45006	-3.22884	0.210901	1.62518	1.0-10.0%
CL0196	DSRM	10	13	4.1599	Q96SI9	STRBP	Spermatid perinuclear RNA-binding protein	-2.4453	-1.97	0.547319	3.5263	1.0-10.0%		CL0196	DSRM	8	13	4.1599	P82675	MRPS5	28S ribosomal protein S5, mitochondrial, MRP-S5, S5mt, Mitochondrial small ribosomal subunit protein uS5m	-1.94193	-1.80614	0.190218	1.5496	1.0-10.0%
CL0196	DSRM	10	13	4.1599	Q12906	ILF3	Interleukin enhancer-binding factor 3, Double-stranded RNA-binding protein 76, DRBP76, M-phase phosphoprotein 4, MPP4, Nuclear factor associated with dsRNA, NFAR, Nuclear factor of activated T-cells 90 kDa, NF-AT-90, Translational control protein 80, TCP80	-1.04459	-0.556161	0.532705	3.40961	1.0-10.0%		CL0196	DSRM	8	13	4.1599	P18583	SON	Protein SON, Bax antagonist selected in saccharomyces 1, BASS1, Negative regulatory element-binding protein, NRE-binding protein, Protein DBP-5, SON3	-1.9312	-1.66417	0.183454	1.52565	1.0-10.0%
CL0196	DSRM	10	13	4.1599	P55265	ADAR	Double-stranded RNA-specific adenosine deaminase, DRADA, 3.5.4.37, 136 kDa double-stranded RNA-binding protein, p136, Interferon-inducible protein 4, IFI-4, K88DSRBP	-1.47793	-1.32702	0.228179	1.69114	1.0-10.0%		CL0196	DSRM	8	13	4.1599	P78563	ADARB1	Double-stranded RNA-specific editase 1, 3.5.4.37, RNA-editing deaminase 1, RNA-editing enzyme 1, dsRNA adenosine deaminase	-3.05461	-3.04867	0.147739	1.4052	1.0-10.0%
CL0196	DSRM	10	13	4.1599	O95793	STAU1	Double-stranded RNA-binding protein Staufen homolog 1	-3.45006	-3.22884	0.210901	1.62518	1.0-10.0%		CL0196	DSRM	8	13	4.1599	P19525	EIF2AK2	Interferon-induced, double-stranded RNA-activated protein kinase, 2.7.11.1, Eukaryotic translation initiation factor 2-alpha kinase 2, eIF-2A protein kinase 2, Interferon-inducible RNA-dependent protein kinase, P1/eIF-2A protein kinase, Protein kinase RNA-activated, PKR, Protein kinase R, Tyrosine-protein kinase EIF2AK2, 2.7.10.2, p68 kinase	-2.07258	-2.2524	-0.0886375	0.815385	0.1-1.0%
CL0196	DSRM	10	13	4.1599	P82675	MRPS5	28S ribosomal protein S5, mitochondrial, MRP-S5, S5mt, Mitochondrial small ribosomal subunit protein uS5m	-1.94193	-1.80614	0.190218	1.5496	1.0-10.0%		CL0167	Zn_Beta_Ribbon	9	12	3.61146	P52756	RBM5	RNA-binding protein 5, Protein G15, Putative tumor suppressor LUCA15, RNA-binding motif protein 5, Renal carcinoma antigen NY-REN-9	-2.89429	-1.77427	1.2155	16.4249	>10.0%
CL0196	DSRM	10	13	4.1599	P18583	SON	Protein SON, Bax antagonist selected in saccharomyces 1, BASS1, Negative regulatory element-binding protein, NRE-binding protein, Protein DBP-5, SON3	-1.9312	-1.66417	0.183454	1.52565	1.0-10.0%		CL0167	Zn_Beta_Ribbon	9	12	3.61146	Q92804	TAF15	TATA-binding protein-associated factor 2N, 68 kDa TATA-binding protein-associated factor, TAF(II)68, TAFII68, RNA-binding protein 56	-1.73012	-0.976834	0.872205	7.45083	1.0-10.0%
CL0196	DSRM	10	13	4.1599	P78563	ADARB1	Double-stranded RNA-specific editase 1, 3.5.4.37, RNA-editing deaminase 1, RNA-editing enzyme 1, dsRNA adenosine deaminase	-3.05461	-3.04867	0.147739	1.4052	1.0-10.0%		CL0167	Zn_Beta_Ribbon	9	12	3.61146	P35637	FUS	RNA-binding protein FUS, 75 kDa DNA-pairing protein, Oncogene FUS, Oncogene TLS, POMp75, Translocated in liposarcoma protein	-1.15281	-0.390694	0.862906	7.29299	1.0-10.0%
CL0196	DSRM	10	13	4.1599	P19525	EIF2AK2	Interferon-induced, double-stranded RNA-activated protein kinase, 2.7.11.1, Eukaryotic translation initiation factor 2-alpha kinase 2, eIF-2A protein kinase 2, Interferon-inducible RNA-dependent protein kinase, P1/eIF-2A protein kinase, Protein kinase RNA-activated, PKR, Protein kinase R, Tyrosine-protein kinase EIF2AK2, 2.7.10.2, p68 kinase	-2.07258	-2.2524	-0.0886375	0.815385	0.1-1.0%		CL0167	Zn_Beta_Ribbon	9	12	3.61146	P98175	RBM10	RNA-binding protein 10, G patch domain-containing protein 9, RNA-binding motif protein 10, RNA-binding protein S1-1, S1-1	-2.11429	-1.37955	0.804448	6.37453	1.0-10.0%
CL0639	Rof	11	1	3.97198	O95707	POP4	Ribonuclease P protein subunit p29, hPOP4	-3.7329	-3.25836	0.599007	3.97198	1.0-10.0%		CL0167	Zn_Beta_Ribbon	9	12	3.61146	Q01844	EWSR1	RNA-binding protein EWS, EWS oncogene, Ewing sarcoma breakpoint region 1 protein	-1.61961	-1.21289	0.503767	3.18983	1.0-10.0%
CL0523	GAG-polyprotein	12	1	3.87911	Q86TG7	PEG10	Retrotransposon-derived protein PEG10, Embryonal carcinoma differentiation-regulated protein, Mammalian retrotransposon-derived protein 2, Myelin expression factor 3-like protein 1, MEF3-like protein 1, Paternally expressed gene 10 protein, Retrotransposon gag domain-containing protein 3, Retrotransposon-derived gag-like polyprotein, Ty3/Gypsy-like protein	-2.68971	-2.19824	0.588733	3.87911	1.0-10.0%		CL0167	Zn_Beta_Ribbon	9	12	3.61146	Q9ULX3	NOB1	RNA-binding protein NOB1, 3.1.-.-, Phosphorylation regulatory protein HP-10, Protein ART-4	-1.94881	-1.79705	0.222375	1.66869	1.0-10.0%
CL0129	Peptidase_AA	13	1	3.87911	Q86TG7	PEG10	Retrotransposon-derived protein PEG10, Embryonal carcinoma differentiation-regulated protein, Mammalian retrotransposon-derived protein 2, Myelin expression factor 3-like protein 1, MEF3-like protein 1, Paternally expressed gene 10 protein, Retrotransposon gag domain-containing protein 3, Retrotransposon-derived gag-like polyprotein, Ty3/Gypsy-like protein	-2.68971	-2.19824	0.588733	3.87911	1.0-10.0%		CL0167	Zn_Beta_Ribbon	9	12	3.61146	P62979	RPS27A	Ubiquitin-40S ribosomal protein S27a, Ubiquitin carboxyl extension protein 80	-0.574283	-1.04055	-0.358288	0.43824	0.1-1.0%
CL0539	RNase_III	14	1	3.71546	Q9UPY3	DICER1	Endoribonuclease Dicer, 3.1.26.3, Helicase with RNase motif, Helicase MOI	-3.6189	-3.14511	0.570013	3.71546	1.0-10.0%		CL0167	Zn_Beta_Ribbon	9	12	3.61146	P09874	PARP1	Poly [ADP-ribose] polymerase, 2.4.2.30	-1.07903	-1.78142	-0.689837	0.20425	0.1-1.0%
CL0167	Zn_Beta_Ribbon	15	12	3.61146	P52756	RBM5	RNA-binding protein 5, Protein G15, Putative tumor suppressor LUCA15, RNA-binding motif protein 5, Renal carcinoma antigen NY-REN-9	-2.89429	-1.77427	1.2155	16.4249	>10.0%		CL0167	Zn_Beta_Ribbon	9	12	3.61146	P49792	RANBP2	E3 SUMO-protein ligase RanBP2, 2.3.2.-, 358 kDa nucleoporin, Nuclear pore complex protein Nup358, Nucleoporin Nup358, Ran-binding protein 2, RanBP2, p270	-1.4217	-2.30098	-0.905955	0.124178	0.1-1.0%
CL0167	Zn_Beta_Ribbon	15	12	3.61146	Q92804	TAF15	TATA-binding protein-associated factor 2N, 68 kDa TATA-binding protein-associated factor, TAF(II)68, TAFII68, RNA-binding protein 56	-1.73012	-0.976834	0.872205	7.45083	1.0-10.0%		CL0167	Zn_Beta_Ribbon	9	12	3.61146	Q96HC4	PDLIM5	PDZ and LIM domain protein 5, Enigma homolog, Enigma-like PDZ and LIM domains protein	-1.64231	-2.77798	-1.12174	0.0755543	0.01-0.1%
CL0167	Zn_Beta_Ribbon	15	12	3.61146	P35637	FUS	RNA-binding protein FUS, 75 kDa DNA-pairing protein, Oncogene FUS, Oncogene TLS, POMp75, Translocated in liposarcoma protein	-1.15281	-0.390694	0.862906	7.29299	1.0-10.0%		CL0167	Zn_Beta_Ribbon	9	12	3.61146	Q9NSE4	IARS2	Isoleucine--tRNA ligase, mitochondrial, 6.1.1.5, Isoleucyl-tRNA synthetase, IleRS	-2.04096	-3.09883	-1.18666	0.0650634	0.01-0.1%
CL0167	Zn_Beta_Ribbon	15	12	3.61146	P98175	RBM10	RNA-binding protein 10, G patch domain-containing protein 9, RNA-binding motif protein 10, RNA-binding protein S1-1, S1-1	-2.11429	-1.37955	0.804448	6.37453	1.0-10.0%		CL0167	Zn_Beta_Ribbon	9	12	3.61146	P21291	CSRP1	Cysteine and glycine-rich protein 1, Cysteine-rich protein 1, CRP, CRP1, Epididymis luminal protein 141, HEL-141	-1.40905	-2.80713	-1.54466	0.0285326	0.01-0.1%
CL0167	Zn_Beta_Ribbon	15	12	3.61146	Q01844	EWSR1	RNA-binding protein EWS, EWS oncogene, Ewing sarcoma breakpoint region 1 protein	-1.61961	-1.21289	0.503767	3.18983	1.0-10.0%		CL0649	PseudoU_synth	10	5	3.35567	Q96CM3	RPUSD4	Pseudouridylate synthase RPUSD4, mitochondrial, 5.4.99.-, RNA pseudouridylate synthase domain-containing protein 4	-3.00402	-2.18511	0.943135	8.77274	1.0-10.0%
CL0167	Zn_Beta_Ribbon	15	12	3.61146	Q9ULX3	NOB1	RNA-binding protein NOB1, 3.1.-.-, Phosphorylation regulatory protein HP-10, Protein ART-4	-1.94881	-1.79705	0.222375	1.66869	1.0-10.0%		CL0649	PseudoU_synth	10	5	3.35567	O95900	TRUB2	Pseudouridylate synthase TRUB2, mitochondrial, 5.4.99.-, TruB pseudouridine synthase homolog 2, tRNA pseudouridine 55 synthase TRUB2, Psi55 synthase TRUB2, 5.4.99.25	-3.17512	-2.52207	0.726894	5.33205	1.0-10.0%
CL0167	Zn_Beta_Ribbon	15	12	3.61146	P62979	RPS27A	Ubiquitin-40S ribosomal protein S27a, Ubiquitin carboxyl extension protein 80	-0.574283	-1.04055	-0.358288	0.43824	0.1-1.0%		CL0649	PseudoU_synth	10	5	3.35567	O60832	DKC1	H/ACA ribonucleoprotein complex subunit DKC1, 5.4.99.-, CBF5 homolog, Dyskerin, Nopp140-associated protein of 57 kDa, Nucleolar protein NAP57, Nucleolar protein family A member 4, snoRNP protein DKC1	-1.53399	-1.33799	0.282601	1.91691	1.0-10.0%
CL0167	Zn_Beta_Ribbon	15	12	3.61146	P09874	PARP1	Poly [ADP-ribose] polymerase, 2.4.2.30	-1.07903	-1.78142	-0.689837	0.20425	0.1-1.0%		CL0649	PseudoU_synth	10	5	3.35567	Q96PZ0	PUS7	Pseudouridylate synthase 7 homolog, 5.4.99.-	-2.06882	-2.36917	-0.212179	0.613508	0.1-1.0%
CL0167	Zn_Beta_Ribbon	15	12	3.61146	P49792	RANBP2	E3 SUMO-protein ligase RanBP2, 2.3.2.-, 358 kDa nucleoporin, Nuclear pore complex protein Nup358, Nucleoporin Nup358, Ran-binding protein 2, RanBP2, p270	-1.4217	-2.30098	-0.905955	0.124178	0.1-1.0%		CL0649	PseudoU_synth	10	5	3.35567	Q9Y606	PUS1	Pseudouridylate synthase 1 homolog, 5.4.99.-, tRNA pseudouridine synthase 1, 5.4.99.12, tRNA pseudouridine(38-40) synthase, tRNA pseudouridylate synthase I, tRNA-uridine isomerase I	-2.27452	-3.04843	-0.844232	0.143142	0.1-1.0%
CL0167	Zn_Beta_Ribbon	15	12	3.61146	Q96HC4	PDLIM5	PDZ and LIM domain protein 5, Enigma homolog, Enigma-like PDZ and LIM domains protein	-1.64231	-2.77798	-1.12174	0.0755543	0.01-0.1%		CL0109	CDA	11	5	3.09495	Q9NS39	ADARB2	Double-stranded RNA-specific editase B2, 3.5.-.-, RNA-dependent adenosine deaminase 3, RNA-editing deaminase 2, RNA-editing enzyme 2, dsRNA adenosine deaminase B2	-4.29138	-3.5759	0.798711	6.29088	1.0-10.0%
CL0167	Zn_Beta_Ribbon	15	12	3.61146	Q9NSE4	IARS2	Isoleucine--tRNA ligase, mitochondrial, 6.1.1.5, Isoleucyl-tRNA synthetase, IleRS	-2.04096	-3.09883	-1.18666	0.0650634	0.01-0.1%		CL0109	CDA	11	5	3.09495	Q9UH17	APOBEC3B	DNA dC->dU-editing enzyme APOBEC-3B, A3B, 3.5.4.38, Phorbolin-1-related protein, Phorbolin-2/3	-2.81545	-2.30883	0.574827	3.75688	1.0-10.0%
CL0167	Zn_Beta_Ribbon	15	12	3.61146	P21291	CSRP1	Cysteine and glycine-rich protein 1, Cysteine-rich protein 1, CRP, CRP1, Epididymis luminal protein 141, HEL-141	-1.40905	-2.80713	-1.54466	0.0285326	0.01-0.1%		CL0109	CDA	11	5	3.09495	Q9NRW3	APOBEC3C	DNA dC->dU-editing enzyme APOBEC-3C, A3C, 3.5.4.38, APOBEC1-like, Phorbolin I	-2.86462	-2.58945	0.367476	2.33065	1.0-10.0%
CL0668	Pre-PUA	16	1	3.48801	P41214	EIF2D	Eukaryotic translation initiation factor 2D, eIF2d, Hepatocellular carcinoma-associated antigen 56, Ligatin	-2.78969	-2.34834	0.542578	3.48801	1.0-10.0%		CL0109	CDA	11	5	3.09495	P55265	ADAR	Double-stranded RNA-specific adenosine deaminase, DRADA, 3.5.4.37, 136 kDa double-stranded RNA-binding protein, p136, Interferon-inducible protein 4, IFI-4, K88DSRBP	-1.47793	-1.32702	0.228179	1.69114	1.0-10.0%
CL0649	PseudoU_synth	17	5	3.35567	Q96CM3	RPUSD4	Pseudouridylate synthase RPUSD4, mitochondrial, 5.4.99.-, RNA pseudouridylate synthase domain-containing protein 4	-3.00402	-2.18511	0.943135	8.77274	1.0-10.0%		CL0109	CDA	11	5	3.09495	P78563	ADARB1	Double-stranded RNA-specific editase 1, 3.5.4.37, RNA-editing deaminase 1, RNA-editing enzyme 1, dsRNA adenosine deaminase	-3.05461	-3.04867	0.147739	1.4052	1.0-10.0%
CL0649	PseudoU_synth	17	5	3.35567	O95900	TRUB2	Pseudouridylate synthase TRUB2, mitochondrial, 5.4.99.-, TruB pseudouridine synthase homolog 2, tRNA pseudouridine 55 synthase TRUB2, Psi55 synthase TRUB2, 5.4.99.25	-3.17512	-2.52207	0.726894	5.33205	1.0-10.0%		CL0267	S11_L18p	12	4	3.01181	P46777	RPL5	60S ribosomal protein L5, Large ribosomal subunit protein uL18	-0.465988	0.438827	1.0161	10.3776	>10.0%
CL0649	PseudoU_synth	17	5	3.35567	O60832	DKC1	H/ACA ribonucleoprotein complex subunit DKC1, 5.4.99.-, CBF5 homolog, Dyskerin, Nopp140-associated protein of 57 kDa, Nucleolar protein NAP57, Nucleolar protein family A member 4, snoRNP protein DKC1	-1.53399	-1.33799	0.282601	1.91691	1.0-10.0%		CL0267	S11_L18p	12	4	3.01181	Q9H8Y5	ANKZF1	Ankyrin repeat and zinc finger domain-containing protein 1, Zinc finger protein 744	-3.09188	-3.20658	-0.0223608	0.949815	0.1-1.0%
CL0649	PseudoU_synth	17	5	3.35567	Q96PZ0	PUS7	Pseudouridylate synthase 7 homolog, 5.4.99.-	-2.06882	-2.36917	-0.212179	0.613508	0.1-1.0%		CL0267	S11_L18p	12	4	3.01181	P62263	RPS14	40S ribosomal protein S14, Small ribosomal subunit protein uS11	-0.754576	-1.12372	-0.271965	0.534608	0.1-1.0%
CL0649	PseudoU_synth	17	5	3.35567	Q9Y606	PUS1	Pseudouridylate synthase 1 homolog, 5.4.99.-, tRNA pseudouridine synthase 1, 5.4.99.12, tRNA pseudouridine(38-40) synthase, tRNA pseudouridylate synthase I, tRNA-uridine isomerase I	-2.27452	-3.04843	-0.844232	0.143142	0.1-1.0%		CL0267	S11_L18p	12	4	3.01181	P62495	ETF1	Eukaryotic peptide chain release factor subunit 1, Eukaryotic release factor 1, eRF1, Protein Cl1, TB3-1	-1.58076	-2.29465	-0.732296	0.185227	0.1-1.0%
CL0109	CDA	18	5	3.09495	Q9NS39	ADARB2	Double-stranded RNA-specific editase B2, 3.5.-.-, RNA-dependent adenosine deaminase 3, RNA-editing deaminase 2, RNA-editing enzyme 2, dsRNA adenosine deaminase B2	-4.29138	-3.5759	0.798711	6.29088	1.0-10.0%		CL0107	KOW	13	9	2.93923	P62917	RPL8	60S ribosomal protein L8, Large ribosomal subunit protein uL2	-0.4449	0.551261	1.12365	13.2937	>10.0%
CL0109	CDA	18	5	3.09495	Q9UH17	APOBEC3B	DNA dC->dU-editing enzyme APOBEC-3B, A3B, 3.5.4.38, Phorbolin-1-related protein, Phorbolin-2/3	-2.81545	-2.30883	0.574827	3.75688	1.0-10.0%		CL0107	KOW	13	9	2.93923	Q5T653	MRPL2	39S ribosomal protein L2, mitochondrial, L2mt, MRP-L2, Mitochondrial large ribosomal subunit protein uL2m	-2.48416	-1.77131	0.804403	6.37386	1.0-10.0%
CL0109	CDA	18	5	3.09495	Q9NRW3	APOBEC3C	DNA dC->dU-editing enzyme APOBEC-3C, A3C, 3.5.4.38, APOBEC1-like, Phorbolin I	-2.86462	-2.58945	0.367476	2.33065	1.0-10.0%		CL0107	KOW	13	9	2.93923	P50914	RPL14	60S ribosomal protein L14, CAG-ISL 7, Large ribosomal subunit protein eL14	-0.926765	-0.545169	0.481842	3.03279	1.0-10.0%
CL0109	CDA	18	5	3.09495	P55265	ADAR	Double-stranded RNA-specific adenosine deaminase, DRADA, 3.5.4.37, 136 kDa double-stranded RNA-binding protein, p136, Interferon-inducible protein 4, IFI-4, K88DSRBP	-1.47793	-1.32702	0.228179	1.69114	1.0-10.0%		CL0107	KOW	13	9	2.93923	P61353	RPL27	60S ribosomal protein L27, Large ribosomal subunit protein eL27	-0.646486	-0.604081	0.146395	1.40086	1.0-10.0%
CL0109	CDA	18	5	3.09495	P78563	ADARB1	Double-stranded RNA-specific editase 1, 3.5.4.37, RNA-editing deaminase 1, RNA-editing enzyme 1, dsRNA adenosine deaminase	-3.05461	-3.04867	0.147739	1.4052	1.0-10.0%		CL0107	KOW	13	9	2.93923	O00267	SUPT5H	Transcription elongation factor SPT5, hSPT5, DRB sensitivity-inducing factor 160 kDa subunit, DSIF p160, DRB sensitivity-inducing factor large subunit, DSIF large subunit, Tat-cotransactivator 1 protein, Tat-CT1 protein	-1.85789	-1.89278	-0.0116605	0.973508	0.1-1.0%
CL0267	S11_L18p	19	4	3.01181	P46777	RPL5	60S ribosomal protein L5, Large ribosomal subunit protein uL18	-0.465988	0.438827	1.0161	10.3776	>10.0%		CL0107	KOW	13	9	2.93923	P61254	RPL26	60S ribosomal protein L26, Large ribosomal subunit protein uL24	-0.729943	-0.900829	-0.104143	0.786786	0.1-1.0%
CL0267	S11_L18p	19	4	3.01181	Q9H8Y5	ANKZF1	Ankyrin repeat and zinc finger domain-containing protein 1, Zinc finger protein 744	-3.09188	-3.20658	-0.0223608	0.949815	0.1-1.0%		CL0107	KOW	13	9	2.93923	P46778	RPL21	60S ribosomal protein L21, Large ribosomal subunit protein eL21	-0.972332	-1.57955	-0.508198	0.310314	0.1-1.0%
CL0267	S11_L18p	19	4	3.01181	P62263	RPS14	40S ribosomal protein S14, Small ribosomal subunit protein uS11	-0.754576	-1.12372	-0.271965	0.534608	0.1-1.0%		CL0107	KOW	13	9	2.93923	P49406	MRPL19	39S ribosomal protein L19, mitochondrial, L19mt, MRP-L19, 39S ribosomal protein L15, mitochondrial, L15mt, MRP-L15, Mitochondrial large ribosomal subunit protein bL19m	-2.25687	-3.01798	-0.780054	0.165938	0.1-1.0%
CL0267	S11_L18p	19	4	3.01181	P62495	ETF1	Eukaryotic peptide chain release factor subunit 1, Eukaryotic release factor 1, eRF1, Protein Cl1, TB3-1	-1.58076	-2.29465	-0.732296	0.185227	0.1-1.0%		CL0107	KOW	13	9	2.93923	P62701	RPS4X	40S ribosomal protein S4, X isoform, SCR10, Single copy abundant mRNA protein, Small ribosomal subunit protein eS4	-0.493616	-1.42883	-0.938189	0.115295	0.1-1.0%
CL0107	KOW	20	9	2.93923	P62917	RPL8	60S ribosomal protein L8, Large ribosomal subunit protein uL2	-0.4449	0.551261	1.12365	13.2937	>10.0%		CL0178	PUA	14	8	2.83041	Q9BYJ9	YTHDF1	YTH domain-containing family protein 1, DF1, Dermatomyositis associated with cancer putative autoantigen 1, DACA-1	-3.57425	-2.60325	1.01649	10.387	>10.0%
CL0107	KOW	20	9	2.93923	Q5T653	MRPL2	39S ribosomal protein L2, mitochondrial, L2mt, MRP-L2, Mitochondrial large ribosomal subunit protein uL2m	-2.48416	-1.77131	0.804403	6.37386	1.0-10.0%		CL0178	PUA	14	8	2.83041	Q9H6S0	YTHDC2	3'-5' RNA helicase YTHDC2, 3.6.4.13, YTH domain-containing protein 2, hYTHDC2	-2.2173	-1.70562	0.551706	3.5621	1.0-10.0%
CL0107	KOW	20	9	2.93923	P50914	RPL14	60S ribosomal protein L14, CAG-ISL 7, Large ribosomal subunit protein eL14	-0.926765	-0.545169	0.481842	3.03279	1.0-10.0%		CL0178	PUA	14	8	2.83041	Q9Y5A9	YTHDF2	YTH domain-containing family protein 2, DF2, CLL-associated antigen KW-14, High-glucose-regulated protein 8, Renal carcinoma antigen NY-REN-2	-2.3093	-1.97815	0.411003	2.57634	1.0-10.0%
CL0107	KOW	20	9	2.93923	P61353	RPL27	60S ribosomal protein L27, Large ribosomal subunit protein eL27	-0.646486	-0.604081	0.146395	1.40086	1.0-10.0%		CL0178	PUA	14	8	2.83041	Q7Z739	YTHDF3	YTH domain-containing family protein 3, DF3	-2.05672	-1.80274	0.335281	2.16412	1.0-10.0%
CL0107	KOW	20	9	2.93923	O00267	SUPT5H	Transcription elongation factor SPT5, hSPT5, DRB sensitivity-inducing factor 160 kDa subunit, DSIF p160, DRB sensitivity-inducing factor large subunit, DSIF large subunit, Tat-cotransactivator 1 protein, Tat-CT1 protein	-1.85789	-1.89278	-0.0116605	0.973508	0.1-1.0%		CL0178	PUA	14	8	2.83041	Q96MU7	YTHDC1	YTH domain-containing protein 1, Splicing factor YT521, YT521-B	-2.15657	-1.95332	0.290304	1.95121	1.0-10.0%
CL0107	KOW	20	9	2.93923	P61254	RPL26	60S ribosomal protein L26, Large ribosomal subunit protein uL24	-0.729943	-0.900829	-0.104143	0.786786	0.1-1.0%		CL0178	PUA	14	8	2.83041	O60832	DKC1	H/ACA ribonucleoprotein complex subunit DKC1, 5.4.99.-, CBF5 homolog, Dyskerin, Nopp140-associated protein of 57 kDa, Nucleolar protein NAP57, Nucleolar protein family A member 4, snoRNP protein DKC1	-1.53399	-1.33799	0.282601	1.91691	1.0-10.0%
CL0107	KOW	20	9	2.93923	P46778	RPL21	60S ribosomal protein L21, Large ribosomal subunit protein eL21	-0.972332	-1.57955	-0.508198	0.310314	0.1-1.0%		CL0178	PUA	14	8	2.83041	Q96T88	UHRF1	E3 ubiquitin-protein ligase UHRF1, 2.3.2.27, Inverted CCAAT box-binding protein of 90 kDa, Nuclear protein 95, Nuclear zinc finger protein Np95, HuNp95, hNp95, RING finger protein 106, RING-type E3 ubiquitin transferase UHRF1, Transcription factor ICBP90, Ubiquitin-like PHD and RING finger domain-containing protein 1, hUHRF1, Ubiquitin-like-containing PHD and RING finger domains protein 1	-2.00224	-3.2404	-1.16141	0.0689581	0.01-0.1%
CL0107	KOW	20	9	2.93923	P49406	MRPL19	39S ribosomal protein L19, mitochondrial, L19mt, MRP-L19, 39S ribosomal protein L15, mitochondrial, L15mt, MRP-L15, Mitochondrial large ribosomal subunit protein bL19m	-2.25687	-3.01798	-0.780054	0.165938	0.1-1.0%		CL0178	PUA	14	8	2.83041	K7EJE8	LONP1	Lon protease homolog, mitochondrial, 3.4.21.53, Lon protease-like protein, LONP, Mitochondrial ATP-dependent protease Lon, Serine protease 15	-1.33923	-2.93955	-1.77691	0.0167144	0.01-0.1%
CL0107	KOW	20	9	2.93923	P62701	RPS4X	40S ribosomal protein S4, X isoform, SCR10, Single copy abundant mRNA protein, Small ribosomal subunit protein eS4	-0.493616	-1.42883	-0.938189	0.115295	0.1-1.0%		CL0357	SMAD-FHA	15	5	2.77132	O43896	KIF1C	Kinesin-like protein KIF1C	-2.92997	-2.16607	0.968451	9.29931	1.0-10.0%
CL0178	PUA	21	8	2.83041	Q9BYJ9	YTHDF1	YTH domain-containing family protein 1, DF1, Dermatomyositis associated with cancer putative autoantigen 1, DACA-1	-3.57425	-2.60325	1.01649	10.387	>10.0%		CL0357	SMAD-FHA	15	5	2.77132	P46013	MKI67	Proliferation marker protein Ki-67, Antigen identified by monoclonal antibody Ki-67, Antigen KI-67, Antigen Ki67	-1.27352	-0.976468	0.339714	2.18632	1.0-10.0%
CL0178	PUA	21	8	2.83041	Q9H6S0	YTHDC2	3'-5' RNA helicase YTHDC2, 3.6.4.13, YTH domain-containing protein 2, hYTHDC2	-2.2173	-1.70562	0.551706	3.5621	1.0-10.0%		CL0357	SMAD-FHA	15	5	2.77132	O60333	KIF1B	Kinesin-like protein KIF1B, Klp	-3.82451	-3.65292	0.118496	1.3137	1.0-10.0%
CL0178	PUA	21	8	2.83041	Q9Y5A9	YTHDF2	YTH domain-containing family protein 2, DF2, CLL-associated antigen KW-14, High-glucose-regulated protein 8, Renal carcinoma antigen NY-REN-2	-2.3093	-1.97815	0.411003	2.57634	1.0-10.0%		CL0357	SMAD-FHA	15	5	2.77132	Q15058	KIF14	Kinesin-like protein KIF14	-3.04602	-2.88005	-0.0422132	0.907375	0.1-1.0%
CL0178	PUA	21	8	2.83041	Q7Z739	YTHDF3	YTH domain-containing family protein 3, DF3	-2.05672	-1.80274	0.335281	2.16412	1.0-10.0%		CL0357	SMAD-FHA	15	5	2.77132	Q5SW79	CEP170	Centrosomal protein of 170 kDa, Cep170, KARP-1-binding protein, KARP1-binding protein	-3.30297	-4.24215	-0.824248	0.149883	0.1-1.0%
CL0178	PUA	21	8	2.83041	Q96MU7	YTHDC1	YTH domain-containing protein 1, Splicing factor YT521, YT521-B	-2.15657	-1.95332	0.290304	1.95121	1.0-10.0%		CL0260	NTP_transf	16	9	2.60186	Q5VYS8	TUT7	Terminal uridylyltransferase 7, TUTase 7, 2.7.7.52, Zinc finger CCHC domain-containing protein 6	-2.77123	-2.05659	0.798184	6.28325	1.0-10.0%
CL0178	PUA	21	8	2.83041	O60832	DKC1	H/ACA ribonucleoprotein complex subunit DKC1, 5.4.99.-, CBF5 homolog, Dyskerin, Nopp140-associated protein of 57 kDa, Nucleolar protein NAP57, Nucleolar protein family A member 4, snoRNP protein DKC1	-1.53399	-1.33799	0.282601	1.91691	1.0-10.0%		CL0260	NTP_transf	16	9	2.60186	Q96SI9	STRBP	Spermatid perinuclear RNA-binding protein	-2.4453	-1.97	0.547319	3.5263	1.0-10.0%
CL0178	PUA	21	8	2.83041	Q96T88	UHRF1	E3 ubiquitin-protein ligase UHRF1, 2.3.2.27, Inverted CCAAT box-binding protein of 90 kDa, Nuclear protein 95, Nuclear zinc finger protein Np95, HuNp95, hNp95, RING finger protein 106, RING-type E3 ubiquitin transferase UHRF1, Transcription factor ICBP90, Ubiquitin-like PHD and RING finger domain-containing protein 1, hUHRF1, Ubiquitin-like-containing PHD and RING finger domains protein 1	-2.00224	-3.2404	-1.16141	0.0689581	0.01-0.1%		CL0260	NTP_transf	16	9	2.60186	Q12906	ILF3	Interleukin enhancer-binding factor 3, Double-stranded RNA-binding protein 76, DRBP76, M-phase phosphoprotein 4, MPP4, Nuclear factor associated with dsRNA, NFAR, Nuclear factor of activated T-cells 90 kDa, NF-AT-90, Translational control protein 80, TCP80	-1.04459	-0.556161	0.532705	3.40961	1.0-10.0%
CL0178	PUA	21	8	2.83041	K7EJE8	LONP1	Lon protease homolog, mitochondrial, 3.4.21.53, Lon protease-like protein, LONP, Mitochondrial ATP-dependent protease Lon, Serine protease 15	-1.33923	-2.93955	-1.77691	0.0167144	0.01-0.1%		CL0260	NTP_transf	16	9	2.60186	Q96KR1	ZFR	Zinc finger RNA-binding protein, hZFR, M-phase phosphoprotein homolog	-1.93827	-1.56035	0.44515	2.78708	1.0-10.0%
CL0638	PAZ	22	2	2.80229	Q9UPY3	DICER1	Endoribonuclease Dicer, 3.1.26.3, Helicase with RNase motif, Helicase MOI	-3.6189	-3.14511	0.570013	3.71546	1.0-10.0%		CL0260	NTP_transf	16	9	2.60186	Q8NDF8	TENT4B	Terminal nucleotidyltransferase 4B, Non-canonical poly(A) RNA polymerase PAPD5, 2.7.7.19, PAP-associated domain-containing protein 5, Terminal guanylyltransferase, 2.7.7.-, Terminal uridylyltransferase 3, TUTase 3, Topoisomerase-related function protein 4-2, TRF4-2	-3.41229	-3.08374	0.442185	2.76812	1.0-10.0%
CL0638	PAZ	22	2	2.80229	Q9UKV8	AGO2	Protein argonaute-2, Argonaute2, hAgo2, 3.1.26.n2, Argonaute RISC catalytic component 2, Eukaryotic translation initiation factor 2C 2, eIF-2C 2, eIF2C 2, PAZ Piwi domain protein, PPD, Protein slicer	-2.6022	-2.36964	0.276257	1.88911	1.0-10.0%		CL0260	NTP_transf	16	9	2.60186	Q12905	ILF2	Interleukin enhancer-binding factor 2, Nuclear factor of activated T-cells 45 kDa	-1.46117	-1.38061	0.178263	1.50752	1.0-10.0%
CL0413	Toprim-like	23	2	2.80227	O95985	TOP3B	DNA topoisomerase 3-beta-1, 5.6.2.1, DNA topoisomerase III beta-1	-2.73258	-2.08166	0.735672	5.44091	1.0-10.0%		CL0260	NTP_transf	16	9	2.60186	Q8N884	CGAS	Cyclic GMP-AMP synthase, cGAMP synthase, cGAS, h-cGAS, 2.7.7.86, 2'3'-cGAMP synthase, Mab-21 domain-containing protein 1	-2.99387	-2.97259	0.136343	1.36881	1.0-10.0%
CL0413	Toprim-like	23	2	2.80227	P11388	TOP2A	DNA topoisomerase 2-alpha, 5.6.2.2, DNA topoisomerase II, alpha isozyme	-1.40704	-2.068	-0.786152	0.163625	0.1-1.0%		CL0260	NTP_transf	16	9	2.60186	Q9Y6K5	OAS3	2'-5'-oligoadenylate synthase 3, (2-5')oligo(A) synthase 3, 2-5A synthase 3, 2.7.7.84, p100 OAS, p100OAS	-2.93524	-2.91958	0.0520113	1.12723	1.0-10.0%
CL0357	SMAD-FHA	24	5	2.77132	O43896	KIF1C	Kinesin-like protein KIF1C	-2.92997	-2.16607	0.968451	9.29931	1.0-10.0%		CL0260	NTP_transf	16	9	2.60186	Q9H6R4	NOL6	Nucleolar protein 6, Nucleolar RNA-associated protein, Nrap	-1.7919	-2.0551	-0.194648	0.638781	0.1-1.0%
CL0357	SMAD-FHA	24	5	2.77132	P46013	MKI67	Proliferation marker protein Ki-67, Antigen identified by monoclonal antibody Ki-67, Antigen KI-67, Antigen Ki67	-1.27352	-0.976468	0.339714	2.18632	1.0-10.0%		CL0021	OB	17	36	2.50007	O75534	CSDE1	Cold shock domain-containing protein E1, N-ras upstream gene protein, Protein UNR	-0.987572	0.0563851	1.14611	13.9993	>10.0%
CL0357	SMAD-FHA	24	5	2.77132	O60333	KIF1B	Kinesin-like protein KIF1B, Klp	-3.82451	-3.65292	0.118496	1.3137	1.0-10.0%		CL0021	OB	17	36	2.50007	P62917	RPL8	60S ribosomal protein L8, Large ribosomal subunit protein uL2	-0.4449	0.551261	1.12365	13.2937	>10.0%
CL0357	SMAD-FHA	24	5	2.77132	Q15058	KIF14	Kinesin-like protein KIF14	-3.04602	-2.88005	-0.0422132	0.907375	0.1-1.0%		CL0021	OB	17	36	2.50007	P16989	YBX3	Y-box-binding protein 3, Cold shock domain-containing protein A, DNA-binding protein A, Single-strand DNA-binding protein NF-GMB	-1.172	-0.313515	0.959988	9.11985	1.0-10.0%
CL0357	SMAD-FHA	24	5	2.77132	Q5SW79	CEP170	Centrosomal protein of 170 kDa, Cep170, KARP-1-binding protein, KARP1-binding protein	-3.30297	-4.24215	-0.824248	0.149883	0.1-1.0%		CL0021	OB	17	36	2.50007	P67809	YBX1	Y-box-binding protein 1, YB-1, CCAAT-binding transcription factor I subunit A, CBF-A, DNA-binding protein B, DBPB, Enhancer factor I subunit A, EFI-A, Nuclease-sensitive element-binding protein 1, Y-box transcription factor	-1.11116	-0.288995	0.884454	7.66397	1.0-10.0%
CL0260	NTP_transf	25	9	2.60186	Q5VYS8	TUT7	Terminal uridylyltransferase 7, TUTase 7, 2.7.7.52, Zinc finger CCHC domain-containing protein 6	-2.77123	-2.05659	0.798184	6.28325	1.0-10.0%		CL0021	OB	17	36	2.50007	Q5T653	MRPL2	39S ribosomal protein L2, mitochondrial, L2mt, MRP-L2, Mitochondrial large ribosomal subunit protein uL2m	-2.48416	-1.77131	0.804403	6.37386	1.0-10.0%
CL0260	NTP_transf	25	9	2.60186	Q96SI9	STRBP	Spermatid perinuclear RNA-binding protein	-2.4453	-1.97	0.547319	3.5263	1.0-10.0%		CL0021	OB	17	36	2.50007	Q9H7E2	TDRD3	Tudor domain-containing protein 3	-3.36759	-2.79395	0.678115	4.76557	1.0-10.0%
CL0260	NTP_transf	25	9	2.60186	Q12906	ILF3	Interleukin enhancer-binding factor 3, Double-stranded RNA-binding protein 76, DRBP76, M-phase phosphoprotein 4, MPP4, Nuclear factor associated with dsRNA, NFAR, Nuclear factor of activated T-cells 90 kDa, NF-AT-90, Translational control protein 80, TCP80	-1.04459	-0.556161	0.532705	3.40961	1.0-10.0%		CL0021	OB	17	36	2.50007	Q14690	PDCD11	Protein RRP5 homolog, NF-kappa-B-binding protein, NFBP, Programmed cell death protein 11	-1.43027	-0.861512	0.651272	4.47994	1.0-10.0%
CL0260	NTP_transf	25	9	2.60186	Q96KR1	ZFR	Zinc finger RNA-binding protein, hZFR, M-phase phosphoprotein homolog	-1.93827	-1.56035	0.44515	2.78708	1.0-10.0%		CL0021	OB	17	36	2.50007	Q08211	DHX9	ATP-dependent RNA helicase A, 3.6.4.13, DEAH box protein 9, DExH-box helicase 9, Leukophysin, LKP, Nuclear DNA helicase II, NDH II, RNA helicase A	-0.753926	-0.197232	0.643424	4.39971	1.0-10.0%
CL0260	NTP_transf	25	9	2.60186	Q8NDF8	TENT4B	Terminal nucleotidyltransferase 4B, Non-canonical poly(A) RNA polymerase PAPD5, 2.7.7.19, PAP-associated domain-containing protein 5, Terminal guanylyltransferase, 2.7.7.-, Terminal uridylyltransferase 3, TUTase 3, Topoisomerase-related function protein 4-2, TRF4-2	-3.41229	-3.08374	0.442185	2.76812	1.0-10.0%		CL0021	OB	17	36	2.50007	Q9H6S0	YTHDC2	3'-5' RNA helicase YTHDC2, 3.6.4.13, YTH domain-containing protein 2, hYTHDC2	-2.2173	-1.70562	0.551706	3.5621	1.0-10.0%
CL0260	NTP_transf	25	9	2.60186	Q12905	ILF2	Interleukin enhancer-binding factor 2, Nuclear factor of activated T-cells 45 kDa	-1.46117	-1.38061	0.178263	1.50752	1.0-10.0%		CL0021	OB	17	36	2.50007	Q7L2E3	DHX30	ATP-dependent RNA helicase DHX30, 3.6.4.13, DEAH box protein 30	-1.45219	-0.971255	0.480256	3.02173	1.0-10.0%
CL0260	NTP_transf	25	9	2.60186	Q8N884	CGAS	Cyclic GMP-AMP synthase, cGAMP synthase, cGAS, h-cGAS, 2.7.7.86, 2'3'-cGAMP synthase, Mab-21 domain-containing protein 1	-2.99387	-2.97259	0.136343	1.36881	1.0-10.0%		CL0021	OB	17	36	2.50007	P62280	RPS11	40S ribosomal protein S11, Small ribosomal subunit protein uS17	-0.668591	-0.309706	0.457221	2.86564	1.0-10.0%
CL0260	NTP_transf	25	9	2.60186	Q9Y6K5	OAS3	2'-5'-oligoadenylate synthase 3, (2-5')oligo(A) synthase 3, 2-5A synthase 3, 2.7.7.84, p100 OAS, p100OAS	-2.93524	-2.91958	0.0520113	1.12723	1.0-10.0%		CL0021	OB	17	36	2.50007	Q6P158	DHX57	Putative ATP-dependent RNA helicase DHX57, 3.6.4.13, DEAH box protein 57	-2.26362	-1.78831	0.41788	2.61746	1.0-10.0%
CL0260	NTP_transf	25	9	2.60186	Q9H6R4	NOL6	Nucleolar protein 6, Nucleolar RNA-associated protein, Nrap	-1.7919	-2.0551	-0.194648	0.638781	0.1-1.0%		CL0021	OB	17	36	2.50007	Q9H2U1	DHX36	ATP-dependent DNA/RNA helicase DHX36, 3.6.4.12, 3.6.4.13, DEAD/H box polypeptide 36, DEAH-box protein 36, G4-resolvase-1, G4R1, MLE-like protein 1, RNA helicase associated with AU-rich element protein	-2.2001	-1.9121	0.368584	2.3366	1.0-10.0%
CL0363	H-int	26	1	2.58802	Q6P2Q9	PRPF8	Pre-mRNA-processing-splicing factor 8, 220 kDa U5 snRNP-specific protein, PRP8 homolog, Splicing factor Prp8, p220	-1.05075	-0.71818	0.412968	2.58802	1.0-10.0%		CL0021	OB	17	36	2.50007	Q14562	DHX8	ATP-dependent RNA helicase DHX8, 3.6.4.13, DEAH box protein 8, RNA helicase HRH1	-2.50035	-2.1553	0.261625	1.82652	1.0-10.0%
CL0037	Lysozyme	27	1	2.54853	Q9Y3A2	UTP11	Probable U3 small nucleolar RNA-associated protein 11, U3 snoRNA-associated protein 11, UTP11-like protein	-2.41895	-2.13382	0.406289	2.54853	1.0-10.0%		CL0021	OB	17	36	2.50007	Q7KZ85	SUPT6H	Transcription elongation factor SPT6, hSPT6, Histone chaperone suppressor of Ty6, Tat-cotransactivator 2 protein, Tat-CT2 protein	-2.15682	-1.97292	0.225931	1.6824	1.0-10.0%
CL0383	PheT-TilS	28	1	2.53746	Q8N1G4	LRRC47	Leucine-rich repeat-containing protein 47	-2.07536	-1.76396	0.4044	2.53746	1.0-10.0%		CL0021	OB	17	36	2.50007	Q8IY37	DHX37	Probable ATP-dependent RNA helicase DHX37, 3.6.4.13, DEAH box protein 37	-2.51004	-2.4118	0.167737	1.47142	1.0-10.0%
CL0021	OB	29	36	2.50007	O75534	CSDE1	Cold shock domain-containing protein E1, N-ras upstream gene protein, Protein UNR	-0.987572	0.0563851	1.14611	13.9993	>10.0%		CL0021	OB	17	36	2.50007	Q8N163	CCAR2	Cell cycle and apoptosis regulator protein 2, Cell division cycle and apoptosis regulator protein 2, DBIRD complex subunit KIAA1967, Deleted in breast cancer gene 1 protein, DBC-1, DBC.1, NET35, p30 DBC	-1.86421	-1.959	-0.0113281	0.974253	0.1-1.0%
CL0021	OB	29	36	2.50007	P62917	RPL8	60S ribosomal protein L8, Large ribosomal subunit protein uL2	-0.4449	0.551261	1.12365	13.2937	>10.0%		CL0021	OB	17	36	2.50007	Q9H6R0	DHX33	ATP-dependent RNA helicase DHX33, 3.6.4.13, DEAH box protein 33	-2.45909	-2.66249	-0.122026	0.755047	0.1-1.0%
CL0021	OB	29	36	2.50007	P16989	YBX3	Y-box-binding protein 3, Cold shock domain-containing protein A, DNA-binding protein A, Single-strand DNA-binding protein NF-GMB	-1.172	-0.313515	0.959988	9.11985	1.0-10.0%		CL0021	OB	17	36	2.50007	Q9Y2R5	MRPS17	28S ribosomal protein S17, mitochondrial, MRP-S17, S17mt, Mitochondrial small ribosomal subunit protein uS17m	-2.45887	-2.70498	-0.130072	0.741188	0.1-1.0%
CL0021	OB	29	36	2.50007	P67809	YBX1	Y-box-binding protein 1, YB-1, CCAAT-binding transcription factor I subunit A, CBF-A, DNA-binding protein B, DBPB, Enhancer factor I subunit A, EFI-A, Nuclease-sensitive element-binding protein 1, Y-box transcription factor	-1.11116	-0.288995	0.884454	7.66397	1.0-10.0%		CL0021	OB	17	36	2.50007	Q8IYB7	DIS3L2	DIS3-like exonuclease 2, hDIS3L2, 3.1.13.-	-2.36827	-2.60193	-0.162731	0.687495	0.1-1.0%
CL0021	OB	29	36	2.50007	Q5T653	MRPL2	39S ribosomal protein L2, mitochondrial, L2mt, MRP-L2, Mitochondrial large ribosomal subunit protein uL2m	-2.48416	-1.77131	0.804403	6.37386	1.0-10.0%		CL0021	OB	17	36	2.50007	Q7Z478	DHX29	ATP-dependent RNA helicase DHX29, 3.6.4.13, DEAH box protein 29, Nucleic acid helicase DDXx	-1.85745	-2.19328	-0.254087	0.557075	0.1-1.0%
CL0021	OB	29	36	2.50007	Q9H7E2	TDRD3	Tudor domain-containing protein 3	-3.36759	-2.79395	0.678115	4.76557	1.0-10.0%		CL0021	OB	17	36	2.50007	O43143	DHX15	ATP-dependent RNA helicase DHX15, 3.6.4.13, ATP-dependent RNA helicase #46, DEAH box protein 15, Splicing factor Prp43, hPrp43	-1.21943	-1.54796	-0.399113	0.398921	0.1-1.0%
CL0021	OB	29	36	2.50007	Q14690	PDCD11	Protein RRP5 homolog, NF-kappa-B-binding protein, NFBP, Programmed cell death protein 11	-1.43027	-0.861512	0.651272	4.47994	1.0-10.0%		CL0021	OB	17	36	2.50007	Q16666	IFI16	Gamma-interferon-inducible protein 16, Ifi-16, Interferon-inducible myeloid differentiation transcriptional activator	-2.36937	-2.92302	-0.43517	0.367139	0.1-1.0%
CL0021	OB	29	36	2.50007	Q08211	DHX9	ATP-dependent RNA helicase A, 3.6.4.13, DEAH box protein 9, DExH-box helicase 9, Leukophysin, LKP, Nuclear DNA helicase II, NDH II, RNA helicase A	-0.753926	-0.197232	0.643424	4.39971	1.0-10.0%		CL0021	OB	17	36	2.50007	P05198	EIF2S1	Eukaryotic translation initiation factor 2 subunit 1, Eukaryotic translation initiation factor 2 subunit alpha, eIF-2-alpha, eIF-2A, eIF-2alpha	-1.45194	-1.96033	-0.459303	0.347294	0.1-1.0%
CL0021	OB	29	36	2.50007	Q9H6S0	YTHDC2	3'-5' RNA helicase YTHDC2, 3.6.4.13, YTH domain-containing protein 2, hYTHDC2	-2.2173	-1.70562	0.551706	3.5621	1.0-10.0%		CL0021	OB	17	36	2.50007	P47813	EIF1AX	Eukaryotic translation initiation factor 1A, X-chromosomal, eIF-1A X isoform, Eukaryotic translation initiation factor 4C, eIF-4C	-1.47238	-2.06585	-0.50775	0.310635	0.1-1.0%
CL0021	OB	29	36	2.50007	Q7L2E3	DHX30	ATP-dependent RNA helicase DHX30, 3.6.4.13, DEAH box protein 30	-1.45219	-0.971255	0.480256	3.02173	1.0-10.0%		CL0021	OB	17	36	2.50007	P62266	RPS23	40S ribosomal protein S23, Small ribosomal subunit protein uS12	-1.16009	-1.86183	-0.587409	0.258578	0.1-1.0%
CL0021	OB	29	36	2.50007	P62280	RPS11	40S ribosomal protein S11, Small ribosomal subunit protein uS17	-0.668591	-0.309706	0.457221	2.86564	1.0-10.0%		CL0021	OB	17	36	2.50007	Q8IX12	CCAR1	Cell division cycle and apoptosis regulator protein 1, Cell cycle and apoptosis regulatory protein 1, CARP-1, Death inducer with SAP domain	-2.03837	-2.54188	-0.614735	0.242809	0.1-1.0%
CL0021	OB	29	36	2.50007	Q6P158	DHX57	Putative ATP-dependent RNA helicase DHX57, 3.6.4.13, DEAH box protein 57	-2.26362	-1.78831	0.41788	2.61746	1.0-10.0%		CL0021	OB	17	36	2.50007	O60231	DHX16	Pre-mRNA-splicing factor ATP-dependent RNA helicase DHX16, 3.6.4.13, ATP-dependent RNA helicase #3, DEAH-box protein 16	-2.35261	-3.08461	-0.700106	0.199477	0.1-1.0%
CL0021	OB	29	36	2.50007	Q9H2U1	DHX36	ATP-dependent DNA/RNA helicase DHX36, 3.6.4.12, 3.6.4.13, DEAD/H box polypeptide 36, DEAH-box protein 36, G4-resolvase-1, G4R1, MLE-like protein 1, RNA helicase associated with AU-rich element protein	-2.2001	-1.9121	0.368584	2.3366	1.0-10.0%		CL0021	OB	17	36	2.50007	Q15046	KARS1	Lysine--tRNA ligase, 2.7.7.-, 6.1.1.6, Lysyl-tRNA synthetase, LysRS	-1.61665	-2.37739	-0.813761	0.153546	0.1-1.0%
CL0021	OB	29	36	2.50007	Q14562	DHX8	ATP-dependent RNA helicase DHX8, 3.6.4.13, DEAH box protein 8, RNA helicase HRH1	-2.50035	-2.1553	0.261625	1.82652	1.0-10.0%		CL0021	OB	17	36	2.50007	Q96I59	NARS2	Probable asparagine--tRNA ligase, mitochondrial, 6.1.1.22, Asparaginyl-tRNA synthetase, AsnRS	-3.06067	-3.86125	-0.888742	0.129199	0.1-1.0%
CL0021	OB	29	36	2.50007	Q7KZ85	SUPT6H	Transcription elongation factor SPT6, hSPT6, Histone chaperone suppressor of Ty6, Tat-cotransactivator 2 protein, Tat-CT2 protein	-2.15682	-1.97292	0.225931	1.6824	1.0-10.0%		CL0021	OB	17	36	2.50007	P62701	RPS4X	40S ribosomal protein S4, X isoform, SCR10, Single copy abundant mRNA protein, Small ribosomal subunit protein eS4	-0.493616	-1.42883	-0.938189	0.115295	0.1-1.0%
CL0021	OB	29	36	2.50007	Q8IY37	DHX37	Probable ATP-dependent RNA helicase DHX37, 3.6.4.13, DEAH box protein 37	-2.51004	-2.4118	0.167737	1.47142	1.0-10.0%		CL0021	OB	17	36	2.50007	O43776	NARS1	Asparagine--tRNA ligase, cytoplasmic, 6.1.1.22, Asparaginyl-tRNA synthetase, AsnRS, Asparaginyl-tRNA synthetase 1	-1.53183	-2.54968	-0.998393	0.100371	0.1-1.0%
CL0021	OB	29	36	2.50007	Q8N163	CCAR2	Cell cycle and apoptosis regulator protein 2, Cell division cycle and apoptosis regulator protein 2, DBIRD complex subunit KIAA1967, Deleted in breast cancer gene 1 protein, DBC-1, DBC.1, NET35, p30 DBC	-1.86421	-1.959	-0.0113281	0.974253	0.1-1.0%		CL0021	OB	17	36	2.50007	P63241	EIF5A	Eukaryotic translation initiation factor 5A-1, eIF-5A-1, eIF-5A1, Eukaryotic initiation factor 5A isoform 1, eIF-5A, Rev-binding factor, eIF-4D	-0.564525	-1.74115	-1.2469	0.0566369	0.01-0.1%
CL0021	OB	29	36	2.50007	Q9H6R0	DHX33	ATP-dependent RNA helicase DHX33, 3.6.4.13, DEAH box protein 33	-2.45909	-2.66249	-0.122026	0.755047	0.1-1.0%		CL0021	OB	17	36	2.50007	P62857	RPS28	40S ribosomal protein S28, Small ribosomal subunit protein eS28	-1.30339	-2.6184	-1.26633	0.0541594	0.01-0.1%
CL0021	OB	29	36	2.50007	Q9Y2R5	MRPS17	28S ribosomal protein S17, mitochondrial, MRP-S17, S17mt, Mitochondrial small ribosomal subunit protein uS17m	-2.45887	-2.70498	-0.130072	0.741188	0.1-1.0%		CL0021	OB	17	36	2.50007	P54577	YARS1	Tyrosine--tRNA ligase, cytoplasmic, 6.1.1.1, Tyrosyl-tRNA synthetase, TyrRS	-1.34575	-2.63983	-1.32194	0.0476499	0.01-0.1%
CL0021	OB	29	36	2.50007	Q8IYB7	DIS3L2	DIS3-like exonuclease 2, hDIS3L2, 3.1.13.-	-2.36827	-2.60193	-0.162731	0.687495	0.1-1.0%		CL0021	OB	17	36	2.50007	P25205	MCM3	DNA replication licensing factor MCM3, 3.6.4.12, DNA polymerase alpha holoenzyme-associated protein P1, P1-MCM3, RLF subunit beta, p102	-1.44871	-2.82228	-1.5847	0.0260197	0.01-0.1%
CL0021	OB	29	36	2.50007	Q7Z478	DHX29	ATP-dependent RNA helicase DHX29, 3.6.4.13, DEAH box protein 29, Nucleic acid helicase DDXx	-1.85745	-2.19328	-0.254087	0.557075	0.1-1.0%		CL0527	Sm-like	18	9	2.26073	Q8ND56	LSM14A	Protein LSM14 homolog A, Protein FAM61A, Protein SCD6 homolog, Putative alpha-synuclein-binding protein, AlphaSNBP, RNA-associated protein 55A, hRAP55, hRAP55A	-2.54204	-1.87617	0.765601	5.8291	1.0-10.0%
CL0021	OB	29	36	2.50007	O43143	DHX15	ATP-dependent RNA helicase DHX15, 3.6.4.13, ATP-dependent RNA helicase #46, DEAH box protein 15, Splicing factor Prp43, hPrp43	-1.21943	-1.54796	-0.399113	0.398921	0.1-1.0%		CL0527	Sm-like	18	9	2.26073	P62308	SNRPG	Small nuclear ribonucleoprotein G, snRNP-G, Sm protein G, Sm-G, SmG	-2.49136	-1.99842	0.585592	3.85116	1.0-10.0%
CL0021	OB	29	36	2.50007	Q16666	IFI16	Gamma-interferon-inducible protein 16, Ifi-16, Interferon-inducible myeloid differentiation transcriptional activator	-2.36937	-2.92302	-0.43517	0.367139	0.1-1.0%		CL0527	Sm-like	18	9	2.26073	Q8WWM7	ATXN2L	Ataxin-2-like protein, Ataxin-2 domain protein, Ataxin-2-related protein	-2.04237	-1.66336	0.4937	3.11673	1.0-10.0%
CL0021	OB	29	36	2.50007	P05198	EIF2S1	Eukaryotic translation initiation factor 2 subunit 1, Eukaryotic translation initiation factor 2 subunit alpha, eIF-2-alpha, eIF-2A, eIF-2alpha	-1.45194	-1.96033	-0.459303	0.347294	0.1-1.0%		CL0527	Sm-like	18	9	2.26073	Q99700	ATXN2	Ataxin-2, Spinocerebellar ataxia type 2 protein, Trinucleotide repeat-containing gene 13 protein	-2.59587	-2.25978	0.419559	2.6276	1.0-10.0%
CL0021	OB	29	36	2.50007	P47813	EIF1AX	Eukaryotic translation initiation factor 1A, X-chromosomal, eIF-1A X isoform, Eukaryotic translation initiation factor 4C, eIF-4C	-1.47238	-2.06585	-0.50775	0.310635	0.1-1.0%		CL0527	Sm-like	18	9	2.26073	Q9BX40	LSM14B	Protein LSM14 homolog B, RNA-associated protein 55B, hRAP55B	-3.14634	-2.84365	0.413111	2.58887	1.0-10.0%
CL0021	OB	29	36	2.50007	P62266	RPS23	40S ribosomal protein S23, Small ribosomal subunit protein uS12	-1.16009	-1.86183	-0.587409	0.258578	0.1-1.0%		CL0527	Sm-like	18	9	2.26073	P14678	SNRPB	Small nuclear ribonucleoprotein-associated proteins B and B', snRNP-B, Sm protein B/B', Sm-B/B', SmB/B'	-1.39779	-1.51875	-0.0242727	0.945643	0.1-1.0%
CL0021	OB	29	36	2.50007	Q8IX12	CCAR1	Cell division cycle and apoptosis regulator protein 1, Cell cycle and apoptosis regulatory protein 1, CARP-1, Death inducer with SAP domain	-2.03837	-2.54188	-0.614735	0.242809	0.1-1.0%		CL0527	Sm-like	18	9	2.26073	Q9Y4Z0	LSM4	U6 snRNA-associated Sm-like protein LSm4, Glycine-rich protein, GRP	-2.40858	-2.61112	-0.102072	0.790547	0.1-1.0%
CL0021	OB	29	36	2.50007	O60231	DHX16	Pre-mRNA-splicing factor ATP-dependent RNA helicase DHX16, 3.6.4.13, ATP-dependent RNA helicase #3, DEAH-box protein 16	-2.35261	-3.08461	-0.700106	0.199477	0.1-1.0%		CL0527	Sm-like	18	9	2.26073	P62318	SNRPD3	Small nuclear ribonucleoprotein Sm D3, Sm-D3, snRNP core protein D3	-1.50359	-2.10538	-0.518399	0.303111	0.1-1.0%
CL0021	OB	29	36	2.50007	Q15046	KARS1	Lysine--tRNA ligase, 2.7.7.-, 6.1.1.6, Lysyl-tRNA synthetase, LysRS	-1.61665	-2.37739	-0.813761	0.153546	0.1-1.0%		CL0527	Sm-like	18	9	2.26073	P62314	SNRPD1	Small nuclear ribonucleoprotein Sm D1, Sm-D1, Sm-D autoantigen, snRNP core protein D1	-1.81188	-2.36887	-0.531964	0.293789	0.1-1.0%
CL0021	OB	29	36	2.50007	Q96I59	NARS2	Probable asparagine--tRNA ligase, mitochondrial, 6.1.1.22, Asparaginyl-tRNA synthetase, AsnRS	-3.06067	-3.86125	-0.888742	0.129199	0.1-1.0%		CL0329	S5	19	10	2.25289	P15880	RPS2	40S ribosomal protein S2, 40S ribosomal protein S4, Protein LLRep3, Small ribosomal subunit protein uS5	-0.497922	0.641294	1.25139	17.8397	>10.0%
CL0021	OB	29	36	2.50007	P62701	RPS4X	40S ribosomal protein S4, X isoform, SCR10, Single copy abundant mRNA protein, Small ribosomal subunit protein eS4	-0.493616	-1.42883	-0.938189	0.115295	0.1-1.0%		CL0329	S5	19	10	2.25289	P82675	MRPS5	28S ribosomal protein S5, mitochondrial, MRP-S5, S5mt, Mitochondrial small ribosomal subunit protein uS5m	-1.94193	-1.80614	0.190218	1.5496	1.0-10.0%
CL0021	OB	29	36	2.50007	O43776	NARS1	Asparagine--tRNA ligase, cytoplasmic, 6.1.1.22, Asparaginyl-tRNA synthetase, AsnRS, Asparaginyl-tRNA synthetase 1	-1.53183	-2.54968	-0.998393	0.100371	0.1-1.0%		CL0329	S5	19	10	2.25289	Q15029	EFTUD2	116 kDa U5 small nuclear ribonucleoprotein component, Elongation factor Tu GTP-binding domain-containing protein 2, SNU114 homolog, hSNU114, U5 snRNP-specific protein, 116 kDa, U5-116 kDa	-1.10422	-0.973399	0.160317	1.4465	1.0-10.0%
CL0021	OB	29	36	2.50007	P63241	EIF5A	Eukaryotic translation initiation factor 5A-1, eIF-5A-1, eIF-5A1, Eukaryotic initiation factor 5A isoform 1, eIF-5A, Rev-binding factor, eIF-4D	-0.564525	-1.74115	-1.2469	0.0566369	0.01-0.1%		CL0329	S5	19	10	2.25289	P82933	MRPS9	28S ribosomal protein S9, mitochondrial, MRP-S9, S9mt, Mitochondrial small ribosomal subunit protein uS9m	-2.17787	-2.10219	0.0400312	1.09656	1.0-10.0%
CL0021	OB	29	36	2.50007	P62857	RPS28	40S ribosomal protein S28, Small ribosomal subunit protein eS28	-1.30339	-2.6184	-1.26633	0.0541594	0.01-0.1%		CL0329	S5	19	10	2.25289	P13639	EEF2	Elongation factor 2, EF-2	-0.0138232	-0.760362	-0.753756	0.176297	0.1-1.0%
CL0021	OB	29	36	2.50007	P54577	YARS1	Tyrosine--tRNA ligase, cytoplasmic, 6.1.1.1, Tyrosyl-tRNA synthetase, TyrRS	-1.34575	-2.63983	-1.32194	0.0476499	0.01-0.1%		CL0329	S5	19	10	2.25289	P11388	TOP2A	DNA topoisomerase 2-alpha, 5.6.2.2, DNA topoisomerase II, alpha isozyme	-1.40704	-2.068	-0.786152	0.163625	0.1-1.0%
CL0021	OB	29	36	2.50007	P25205	MCM3	DNA replication licensing factor MCM3, 3.6.4.12, DNA polymerase alpha holoenzyme-associated protein P1, P1-MCM3, RLF subunit beta, p102	-1.44871	-2.82228	-1.5847	0.0260197	0.01-0.1%		CL0329	S5	19	10	2.25289	P62249	RPS16	40S ribosomal protein S16, Small ribosomal subunit protein uS9	-0.663344	-1.62709	-1.04274	0.090627	0.01-0.1%
CL0527	Sm-like	30	9	2.26073	Q8ND56	LSM14A	Protein LSM14 homolog A, Protein FAM61A, Protein SCD6 homolog, Putative alpha-synuclein-binding protein, AlphaSNBP, RNA-associated protein 55A, hRAP55, hRAP55A	-2.54204	-1.87617	0.765601	5.8291	1.0-10.0%		CL0329	S5	19	10	2.25289	Q96RP9	GFM1	Elongation factor G, mitochondrial, EF-Gmt, Elongation factor G 1, mitochondrial, mEF-G 1, Elongation factor G1, hEFG1	-1.89499	-2.82656	-1.08064	0.0830536	0.01-0.1%
CL0527	Sm-like	30	9	2.26073	P62308	SNRPG	Small nuclear ribonucleoprotein G, snRNP-G, Sm protein G, Sm-G, SmG	-2.49136	-1.99842	0.585592	3.85116	1.0-10.0%		CL0329	S5	19	10	2.25289	Q8TCS8	PNPT1	Polyribonucleotide nucleotidyltransferase 1, mitochondrial, 2.7.7.8, 3'-5' RNA exonuclease OLD35, PNPase old-35, Polynucleotide phosphorylase 1, PNPase 1, Polynucleotide phosphorylase-like protein	-1.69475	-2.89598	-1.1783	0.0663282	0.01-0.1%
CL0527	Sm-like	30	9	2.26073	Q8WWM7	ATXN2L	Ataxin-2-like protein, Ataxin-2 domain protein, Ataxin-2-related protein	-2.04237	-1.66336	0.4937	3.11673	1.0-10.0%		CL0329	S5	19	10	2.25289	K7EJE8	LONP1	Lon protease homolog, mitochondrial, 3.4.21.53, Lon protease-like protein, LONP, Mitochondrial ATP-dependent protease Lon, Serine protease 15	-1.33923	-2.93955	-1.77691	0.0167144	0.01-0.1%
CL0527	Sm-like	30	9	2.26073	Q99700	ATXN2	Ataxin-2, Spinocerebellar ataxia type 2 protein, Trinucleotide repeat-containing gene 13 protein	-2.59587	-2.25978	0.419559	2.6276	1.0-10.0%		CL0219	RNase_H	20	4	2.08568	Q9H9L3	ISG20L2	Interferon-stimulated 20 kDa exonuclease-like 2, 3.1.-.-	-3.79336	-3.33248	0.572738	3.73885	1.0-10.0%
CL0527	Sm-like	30	9	2.26073	Q9BX40	LSM14B	Protein LSM14 homolog B, RNA-associated protein 55B, hRAP55B	-3.14634	-2.84365	0.413111	2.58887	1.0-10.0%		CL0219	RNase_H	20	4	2.08568	Q9GZR2	REXO4	RNA exonuclease 4, 3.1.-.-, Exonuclease XPMC2, Prevents mitotic catastrophe 2 protein homolog, hPMC2	-2.48898	-2.27304	0.326745	2.122	1.0-10.0%
CL0527	Sm-like	30	9	2.26073	P14678	SNRPB	Small nuclear ribonucleoprotein-associated proteins B and B', snRNP-B, Sm protein B/B', Sm-B/B', SmB/B'	-1.39779	-1.51875	-0.0242727	0.945643	0.1-1.0%		CL0219	RNase_H	20	4	2.08568	Q9UKV8	AGO2	Protein argonaute-2, Argonaute2, hAgo2, 3.1.26.n2, Argonaute RISC catalytic component 2, Eukaryotic translation initiation factor 2C 2, eIF-2C 2, eIF2C 2, PAZ Piwi domain protein, PPD, Protein slicer	-2.6022	-2.36964	0.276257	1.88911	1.0-10.0%
CL0527	Sm-like	30	9	2.26073	Q9Y4Z0	LSM4	U6 snRNA-associated Sm-like protein LSm4, Glycine-rich protein, GRP	-2.40858	-2.61112	-0.102072	0.790547	0.1-1.0%		CL0219	RNase_H	20	4	2.08568	Q01780	EXOSC10	Exosome component 10, 3.1.13.-, Autoantigen PM/Scl 2, P100 polymyositis-scleroderma overlap syndrome-associated autoantigen, Polymyositis/scleroderma autoantigen 100 kDa, PM/Scl-100, Polymyositis/scleroderma autoantigen 2	-2.61245	-2.67686	-0.227111	0.592774	0.1-1.0%
CL0527	Sm-like	30	9	2.26073	P62318	SNRPD3	Small nuclear ribonucleoprotein Sm D3, Sm-D3, snRNP core protein D3	-1.50359	-2.10538	-0.518399	0.303111	0.1-1.0%		CL0465	Ank	21	7	2.04005	O75179	ANKRD17	Ankyrin repeat domain-containing protein 17, Gene trap ankyrin repeat protein, Serologically defined breast cancer antigen NY-BR-16	-2.36132	-1.56498	0.892302	7.80372	1.0-10.0%
CL0527	Sm-like	30	9	2.26073	P62314	SNRPD1	Small nuclear ribonucleoprotein Sm D1, Sm-D1, Sm-D autoantigen, snRNP core protein D1	-1.81188	-2.36887	-0.531964	0.293789	0.1-1.0%		CL0465	Ank	21	7	2.04005	Q8IWZ3	ANKHD1	Ankyrin repeat and KH domain-containing protein 1, HIV-1 Vpr-binding ankyrin repeat protein, Multiple ankyrin repeats single KH domain, hMASK	-2.60815	-2.22025	0.483137	3.04184	1.0-10.0%
CL0329	S5	31	10	2.25289	P15880	RPS2	40S ribosomal protein S2, 40S ribosomal protein S4, Protein LLRep3, Small ribosomal subunit protein uS5	-0.497922	0.641294	1.25139	17.8397	>10.0%		CL0465	Ank	21	7	2.04005	Q9P2D0	IBTK	Inhibitor of Bruton tyrosine kinase, IBtk	-3.0107	-2.90489	0.164848	1.46167	1.0-10.0%
CL0329	S5	31	10	2.25289	P82675	MRPS5	28S ribosomal protein S5, mitochondrial, MRP-S5, S5mt, Mitochondrial small ribosomal subunit protein uS5m	-1.94193	-1.80614	0.190218	1.5496	1.0-10.0%		CL0465	Ank	21	7	2.04005	Q9H8Y5	ANKZF1	Ankyrin repeat and zinc finger domain-containing protein 1, Zinc finger protein 744	-3.09188	-3.20658	-0.0223608	0.949815	0.1-1.0%
CL0329	S5	31	10	2.25289	Q15029	EFTUD2	116 kDa U5 small nuclear ribonucleoprotein component, Elongation factor Tu GTP-binding domain-containing protein 2, SNU114 homolog, hSNU114, U5 snRNP-specific protein, 116 kDa, U5-116 kDa	-1.10422	-0.973399	0.160317	1.4465	1.0-10.0%		CL0465	Ank	21	7	2.04005	Q9C0D5	TANC1	Protein TANC1, Tetratricopeptide repeat, ankyrin repeat and coiled-coil domain-containing protein 1	-3.14506	-3.15393	-0.0596748	0.871616	0.1-1.0%
CL0329	S5	31	10	2.25289	P82933	MRPS9	28S ribosomal protein S9, mitochondrial, MRP-S9, S9mt, Mitochondrial small ribosomal subunit protein uS9m	-2.17787	-2.10219	0.0400312	1.09656	1.0-10.0%		CL0465	Ank	21	7	2.04005	Q00653	NFKB2	Nuclear factor NF-kappa-B p100 subunit, DNA-binding factor KBF2, H2TF1, Lymphocyte translocation chromosome 10 protein, Nuclear factor of kappa light polypeptide gene enhancer in B-cells 2, Oncogene Lyt-10, Lyt10	-2.69152	-3.60307	-1.09858	0.0796935	0.01-0.1%
CL0329	S5	31	10	2.25289	P13639	EEF2	Elongation factor 2, EF-2	-0.0138232	-0.760362	-0.753756	0.176297	0.1-1.0%		CL0465	Ank	21	7	2.04005	Q9ULT8	HECTD1	E3 ubiquitin-protein ligase HECTD1, 2.3.2.26, E3 ligase for inhibin receptor, EULIR, HECT domain-containing protein 1	-2.35756	-3.4021	-1.14264	0.0720039	0.01-0.1%
CL0329	S5	31	10	2.25289	P11388	TOP2A	DNA topoisomerase 2-alpha, 5.6.2.2, DNA topoisomerase II, alpha isozyme	-1.40704	-2.068	-0.786152	0.163625	0.1-1.0%		CL0049	Tudor	22	11	2.00794	Q7KZF4	SND1	Staphylococcal nuclease domain-containing protein 1, 3.1.31.1, 100 kDa coactivator, EBNA2 coactivator p100, Tudor domain-containing protein 11, p100 co-activator	-0.918219	-0.228058	0.780434	6.03162	1.0-10.0%
CL0329	S5	31	10	2.25289	P62249	RPS16	40S ribosomal protein S16, Small ribosomal subunit protein uS9	-0.663344	-1.62709	-1.04274	0.090627	0.01-0.1%		CL0049	Tudor	22	11	2.00794	Q9H7E2	TDRD3	Tudor domain-containing protein 3	-3.36759	-2.79395	0.678115	4.76557	1.0-10.0%
CL0329	S5	31	10	2.25289	Q96RP9	GFM1	Elongation factor G, mitochondrial, EF-Gmt, Elongation factor G 1, mitochondrial, mEF-G 1, Elongation factor G1, hEFG1	-1.89499	-2.82656	-1.08064	0.0830536	0.01-0.1%		CL0049	Tudor	22	11	2.00794	P51116	FXR2	RNA-binding protein FXR2, FXR2P, FMR1 autosomal homolog 2	-2.26367	-1.8056	0.569439	3.71056	1.0-10.0%
CL0329	S5	31	10	2.25289	Q8TCS8	PNPT1	Polyribonucleotide nucleotidyltransferase 1, mitochondrial, 2.7.7.8, 3'-5' RNA exonuclease OLD35, PNPase old-35, Polynucleotide phosphorylase 1, PNPase 1, Polynucleotide phosphorylase-like protein	-1.69475	-2.89598	-1.1783	0.0663282	0.01-0.1%		CL0049	Tudor	22	11	2.00794	Q92667	AKAP1	A-kinase anchor protein 1, mitochondrial, A-kinase anchor protein 149 kDa, AKAP 149, Dual specificity A-kinase-anchoring protein 1, D-AKAP-1, Protein kinase A-anchoring protein 1, PRKA1, Spermatid A-kinase anchor protein 84, S-AKAP84	-3.27528	-2.975	0.445428	2.78887	1.0-10.0%
CL0329	S5	31	10	2.25289	K7EJE8	LONP1	Lon protease homolog, mitochondrial, 3.4.21.53, Lon protease-like protein, LONP, Mitochondrial ATP-dependent protease Lon, Serine protease 15	-1.33923	-2.93955	-1.77691	0.0167144	0.01-0.1%		CL0049	Tudor	22	11	2.00794	P51114	FXR1	RNA-binding protein FXR1, FMR1 autosomal homolog 1, hFXR1p	-1.64204	-1.3505	0.389742	2.45325	1.0-10.0%
CL0219	RNase_H	32	4	2.08568	Q9H9L3	ISG20L2	Interferon-stimulated 20 kDa exonuclease-like 2, 3.1.-.-	-3.79336	-3.33248	0.572738	3.73885	1.0-10.0%		CL0049	Tudor	22	11	2.00794	O14647	CHD2	Chromodomain-helicase-DNA-binding protein 2, CHD-2, 3.6.4.12, ATP-dependent helicase CHD2	-4.04931	-4.04226	0.00933296	1.02172	1.0-10.0%
CL0219	RNase_H	32	4	2.08568	Q9GZR2	REXO4	RNA exonuclease 4, 3.1.-.-, Exonuclease XPMC2, Prevents mitotic catastrophe 2 protein homolog, hPMC2	-2.48898	-2.27304	0.326745	2.122	1.0-10.0%		CL0049	Tudor	22	11	2.00794	Q06787	FMR1	Fragile X messenger ribonucleoprotein 1, Fragile X messenger ribonucleoprotein, FMRP, Protein FMR-1	-2.4986	-1.97579	-0.0900303	0.812774	0.1-1.0%
CL0219	RNase_H	32	4	2.08568	Q9UKV8	AGO2	Protein argonaute-2, Argonaute2, hAgo2, 3.1.26.n2, Argonaute RISC catalytic component 2, Eukaryotic translation initiation factor 2C 2, eIF-2C 2, eIF2C 2, PAZ Piwi domain protein, PPD, Protein slicer	-2.6022	-2.36964	0.276257	1.88911	1.0-10.0%		CL0049	Tudor	22	11	2.00794	O14646	CHD1	Chromodomain-helicase-DNA-binding protein 1, CHD-1, 3.6.4.12, ATP-dependent helicase CHD1	-2.52327	-2.61141	-0.503034	0.314026	0.1-1.0%
CL0219	RNase_H	32	4	2.08568	Q01780	EXOSC10	Exosome component 10, 3.1.13.-, Autoantigen PM/Scl 2, P100 polymyositis-scleroderma overlap syndrome-associated autoantigen, Polymyositis/scleroderma autoantigen 100 kDa, PM/Scl-100, Polymyositis/scleroderma autoantigen 2	-2.61245	-2.67686	-0.227111	0.592774	0.1-1.0%		CL0049	Tudor	22	11	2.00794	Q96T88	UHRF1	E3 ubiquitin-protein ligase UHRF1, 2.3.2.27, Inverted CCAAT box-binding protein of 90 kDa, Nuclear protein 95, Nuclear zinc finger protein Np95, HuNp95, hNp95, RING finger protein 106, RING-type E3 ubiquitin transferase UHRF1, Transcription factor ICBP90, Ubiquitin-like PHD and RING finger domain-containing protein 1, hUHRF1, Ubiquitin-like-containing PHD and RING finger domains protein 1	-2.00224	-3.2404	-1.16141	0.0689581	0.01-0.1%
CL0669	NOG1_N	33	1	2.06469	Q9BZE4	GTPBP4	GTP-binding protein 4, Chronic renal failure gene protein, GTP-binding protein NGB, Nucleolar GTP-binding protein 1	-1.30903	-1.08928	0.314854	2.06469	1.0-10.0%		CL0049	Tudor	22	11	2.00794	Q14839	CHD4	Chromodomain-helicase-DNA-binding protein 4, CHD-4, 3.6.4.12, ATP-dependent helicase CHD4, Mi-2 autoantigen 218 kDa protein, Mi2-beta	-1.58344	-2.48072	-1.21008	0.0616485	0.01-0.1%
CL0465	Ank	34	7	2.04005	O75179	ANKRD17	Ankyrin repeat domain-containing protein 17, Gene trap ankyrin repeat protein, Serologically defined breast cancer antigen NY-BR-16	-2.36132	-1.56498	0.892302	7.80372	1.0-10.0%		CL0049	Tudor	22	11	2.00794	P52701	MSH6	DNA mismatch repair protein Msh6, hMSH6, G/T mismatch-binding protein, GTBP, GTMBP, MutS protein homolog 6, MutS-alpha 160 kDa subunit, p160	-1.6424	-2.76374	-1.23382	0.0583687	0.01-0.1%
CL0465	Ank	34	7	2.04005	Q8IWZ3	ANKHD1	Ankyrin repeat and KH domain-containing protein 1, HIV-1 Vpr-binding ankyrin repeat protein, Multiple ankyrin repeats single KH domain, hMASK	-2.60815	-2.22025	0.483137	3.04184	1.0-10.0%		CL0051	NTF2	23	4	1.96554	Q13283	G3BP1	Ras GTPase-activating protein-binding protein 1, G3BP-1, 3.6.4.12, 3.6.4.13, ATP-dependent DNA helicase VIII, hDH VIII, GAP SH3 domain-binding protein 1	-1.26716	-0.865781	0.501959	3.17657	1.0-10.0%
CL0465	Ank	34	7	2.04005	Q9P2D0	IBTK	Inhibitor of Bruton tyrosine kinase, IBtk	-3.0107	-2.90489	0.164848	1.46167	1.0-10.0%		CL0051	NTF2	23	4	1.96554	Q9UN86	G3BP2	Ras GTPase-activating protein-binding protein 2, G3BP-2, GAP SH3 domain-binding protein 2	-1.62907	-1.30859	0.418481	2.62108	1.0-10.0%
CL0465	Ank	34	7	2.04005	Q9H8Y5	ANKZF1	Ankyrin repeat and zinc finger domain-containing protein 1, Zinc finger protein 744	-3.09188	-3.20658	-0.0223608	0.949815	0.1-1.0%		CL0051	NTF2	23	4	1.96554	Q9BRJ2	MRPL45	39S ribosomal protein L45, mitochondrial, L45mt, MRP-L45, Mitochondrial large ribosomal subunit protein mL45	-1.98985	-1.92822	0.0907017	1.23226	1.0-10.0%
CL0465	Ank	34	7	2.04005	Q9C0D5	TANC1	Protein TANC1, Tetratricopeptide repeat, ankyrin repeat and coiled-coil domain-containing protein 1	-3.14506	-3.15393	-0.0596748	0.871616	0.1-1.0%		CL0051	NTF2	23	4	1.96554	Q9UBU9	NXF1	Nuclear RNA export factor 1, Tip-associated protein, Tip-associating protein, mRNA export factor TAP	-2.411	-2.57052	-0.0797494	0.832244	0.1-1.0%
CL0465	Ank	34	7	2.04005	Q00653	NFKB2	Nuclear factor NF-kappa-B p100 subunit, DNA-binding factor KBF2, H2TF1, Lymphocyte translocation chromosome 10 protein, Nuclear factor of kappa light polypeptide gene enhancer in B-cells 2, Oncogene Lyt-10, Lyt10	-2.69152	-3.60307	-1.09858	0.0796935	0.01-0.1%		CL0123	HTH	24	31	1.88637	Q4G0J3	LARP7	La-related protein 7, La ribonucleoprotein domain family member 7, hLARP7, P-TEFb-interaction protein for 7SK stability, PIP7S	-2.26018	-1.30092	1.02525	10.5986	>10.0%
CL0465	Ank	34	7	2.04005	Q9ULT8	HECTD1	E3 ubiquitin-protein ligase HECTD1, 2.3.2.26, E3 ligase for inhibin receptor, EULIR, HECT domain-containing protein 1	-2.35756	-3.4021	-1.14264	0.0720039	0.01-0.1%		CL0123	HTH	24	31	1.88637	Q9NVS2	MRPS18A	39S ribosomal protein S18a, mitochondrial, MRP-S18-a, Mrps18a, S18mt-a, 39S ribosomal protein S18-3, mitochondrial, MRP-S18-3, Mitochondrial large ribosomal subunit protein bS18a, Mitochondrial large ribosomal subunit protein mL66	-2.22239	-1.37654	0.928103	8.47429	1.0-10.0%
CL0049	Tudor	35	11	2.00794	Q7KZF4	SND1	Staphylococcal nuclease domain-containing protein 1, 3.1.31.1, 100 kDa coactivator, EBNA2 coactivator p100, Tudor domain-containing protein 11, p100 co-activator	-0.918219	-0.228058	0.780434	6.03162	1.0-10.0%		CL0123	HTH	24	31	1.88637	Q7Z2W4	ZC3HAV1	Zinc finger CCCH-type antiviral protein 1, ADP-ribosyltransferase diphtheria toxin-like 13, ARTD13, Inactive Poly [ADP-ribose] polymerase 13, PARP13, Zinc finger CCCH domain-containing protein 2, Zinc finger antiviral protein, ZAP	-1.53752	-0.790168	0.815811	6.54351	1.0-10.0%
CL0049	Tudor	35	11	2.00794	Q9H7E2	TDRD3	Tudor domain-containing protein 3	-3.36759	-2.79395	0.678115	4.76557	1.0-10.0%		CL0123	HTH	24	31	1.88637	Q9BVS4	RIOK2	Serine/threonine-protein kinase RIO2, 2.7.11.1, RIO kinase 2	-1.97939	-1.39576	0.67769	4.76091	1.0-10.0%
CL0049	Tudor	35	11	2.00794	P51116	FXR2	RNA-binding protein FXR2, FXR2P, FMR1 autosomal homolog 2	-2.26367	-1.8056	0.569439	3.71056	1.0-10.0%		CL0123	HTH	24	31	1.88637	Q6PKG0	LARP1	La-related protein 1, La ribonucleoprotein domain family member 1	-1.60698	-1.1285	0.557645	3.61115	1.0-10.0%
CL0049	Tudor	35	11	2.00794	Q92667	AKAP1	A-kinase anchor protein 1, mitochondrial, A-kinase anchor protein 149 kDa, AKAP 149, Dual specificity A-kinase-anchoring protein 1, D-AKAP-1, Protein kinase A-anchoring protein 1, PRKA1, Spermatid A-kinase anchor protein 84, S-AKAP84	-3.27528	-2.975	0.445428	2.78887	1.0-10.0%		CL0123	HTH	24	31	1.88637	Q71RC2	LARP4	La-related protein 4, La ribonucleoprotein domain family member 4	-1.83366	-1.34622	0.537857	3.4503	1.0-10.0%
CL0049	Tudor	35	11	2.00794	P51114	FXR1	RNA-binding protein FXR1, FMR1 autosomal homolog 1, hFXR1p	-1.64204	-1.3505	0.389742	2.45325	1.0-10.0%		CL0123	HTH	24	31	1.88637	Q14152	EIF3A	Eukaryotic translation initiation factor 3 subunit A, eIF3a, Eukaryotic translation initiation factor 3 subunit 10, eIF-3-theta, eIF3 p167, eIF3 p180, eIF3 p185	-0.895077	-0.448298	0.519576	3.30808	1.0-10.0%
CL0049	Tudor	35	11	2.00794	O14647	CHD2	Chromodomain-helicase-DNA-binding protein 2, CHD-2, 3.6.4.12, ATP-dependent helicase CHD2	-4.04931	-4.04226	0.00933296	1.02172	1.0-10.0%		CL0123	HTH	24	31	1.88637	P05455	SSB	Lupus La protein, La autoantigen, La ribonucleoprotein, Sjoegren syndrome type B antigen, SS-B	-1.4811	-1.09113	0.483401	3.04369	1.0-10.0%
CL0049	Tudor	35	11	2.00794	Q06787	FMR1	Fragile X messenger ribonucleoprotein 1, Fragile X messenger ribonucleoprotein, FMRP, Protein FMR-1	-2.4986	-1.97579	-0.0900303	0.812774	0.1-1.0%		CL0123	HTH	24	31	1.88637	Q92615	LARP4B	La-related protein 4B, La ribonucleoprotein domain family member 4B, La ribonucleoprotein domain family member 5, La-related protein 5	-2.48925	-2.10089	0.471045	2.95832	1.0-10.0%
CL0049	Tudor	35	11	2.00794	O14646	CHD1	Chromodomain-helicase-DNA-binding protein 1, CHD-1, 3.6.4.12, ATP-dependent helicase CHD1	-2.52327	-2.61141	-0.503034	0.314026	0.1-1.0%		CL0123	HTH	24	31	1.88637	Q5TC82	RC3H1	Roquin-1, Roquin, 2.3.2.27, RING finger and C3H zinc finger protein 1, RING finger and CCCH-type zinc finger domain-containing protein 1, RING finger protein 198	-2.87008	-2.52151	0.366916	2.32764	1.0-10.0%
CL0049	Tudor	35	11	2.00794	Q96T88	UHRF1	E3 ubiquitin-protein ligase UHRF1, 2.3.2.27, Inverted CCAAT box-binding protein of 90 kDa, Nuclear protein 95, Nuclear zinc finger protein Np95, HuNp95, hNp95, RING finger protein 106, RING-type E3 ubiquitin transferase UHRF1, Transcription factor ICBP90, Ubiquitin-like PHD and RING finger domain-containing protein 1, hUHRF1, Ubiquitin-like-containing PHD and RING finger domains protein 1	-2.00224	-3.2404	-1.16141	0.0689581	0.01-0.1%		CL0123	HTH	24	31	1.88637	Q99613	EIF3C	Eukaryotic translation initiation factor 3 subunit C, eIF3c, Eukaryotic translation initiation factor 3 subunit 8, eIF3 p110	-1.1506	-0.895396	0.298136	1.98671	1.0-10.0%
CL0049	Tudor	35	11	2.00794	Q14839	CHD4	Chromodomain-helicase-DNA-binding protein 4, CHD-4, 3.6.4.12, ATP-dependent helicase CHD4, Mi-2 autoantigen 218 kDa protein, Mi2-beta	-1.58344	-2.48072	-1.21008	0.0616485	0.01-0.1%		CL0123	HTH	24	31	1.88637	P55265	ADAR	Double-stranded RNA-specific adenosine deaminase, DRADA, 3.5.4.37, 136 kDa double-stranded RNA-binding protein, p136, Interferon-inducible protein 4, IFI-4, K88DSRBP	-1.47793	-1.32702	0.228179	1.69114	1.0-10.0%
CL0049	Tudor	35	11	2.00794	P52701	MSH6	DNA mismatch repair protein Msh6, hMSH6, G/T mismatch-binding protein, GTBP, GTMBP, MutS protein homolog 6, MutS-alpha 160 kDa subunit, p160	-1.6424	-2.76374	-1.23382	0.0583687	0.01-0.1%		CL0123	HTH	24	31	1.88637	Q9Y285	FARSA	Phenylalanine--tRNA ligase alpha subunit, 6.1.1.20, CML33, Phenylalanyl-tRNA synthetase alpha subunit, PheRS	-1.79037	-1.89789	-0.0365312	0.919324	0.1-1.0%
CL0051	NTF2	36	4	1.96554	Q13283	G3BP1	Ras GTPase-activating protein-binding protein 1, G3BP-1, 3.6.4.12, 3.6.4.13, ATP-dependent DNA helicase VIII, hDH VIII, GAP SH3 domain-binding protein 1	-1.26716	-0.865781	0.501959	3.17657	1.0-10.0%		CL0123	HTH	24	31	1.88637	P46783	RPS10	40S ribosomal protein S10, Small ribosomal subunit protein eS10	-1.15993	-1.38012	-0.10929	0.777517	0.1-1.0%
CL0051	NTF2	36	4	1.96554	Q9UN86	G3BP2	Ras GTPase-activating protein-binding protein 2, G3BP-2, GAP SH3 domain-binding protein 2	-1.62907	-1.30859	0.418481	2.62108	1.0-10.0%		CL0123	HTH	24	31	1.88637	P27708	CAD	CAD protein, Glutamine-dependent carbamoyl-phosphate synthase, 6.3.5.5, Aspartate carbamoyltransferase, 2.1.3.2, Dihydroorotase, 3.5.2.3	-1.35296	-1.06691	-0.124934	0.750008	0.1-1.0%
CL0051	NTF2	36	4	1.96554	Q9BRJ2	MRPL45	39S ribosomal protein L45, mitochondrial, L45mt, MRP-L45, Mitochondrial large ribosomal subunit protein mL45	-1.98985	-1.92822	0.0907017	1.23226	1.0-10.0%		CL0123	HTH	24	31	1.88637	O60869	EDF1	Endothelial differentiation-related factor 1, EDF-1, Multiprotein-bridging factor 1, MBF1	-1.39044	-1.72194	-0.216009	0.608122	0.1-1.0%
CL0051	NTF2	36	4	1.96554	Q9UBU9	NXF1	Nuclear RNA export factor 1, Tip-associated protein, Tip-associating protein, mRNA export factor TAP	-2.411	-2.57052	-0.0797494	0.832244	0.1-1.0%		CL0123	HTH	24	31	1.88637	P54132	BLM	RecQ-like DNA helicase BLM, 3.6.4.12, Bloom syndrome protein, DNA helicase, RecQ-like type 2, RecQ2, RecQ protein-like 3	-3.36539	-3.7006	-0.286915	0.516517	0.1-1.0%
CL0123	HTH	37	31	1.88637	Q4G0J3	LARP7	La-related protein 7, La ribonucleoprotein domain family member 7, hLARP7, P-TEFb-interaction protein for 7SK stability, PIP7S	-2.26018	-1.30092	1.02525	10.5986	>10.0%		CL0123	HTH	24	31	1.88637	P61011	SRP54	Signal recognition particle subunit SRP54, 3.6.5.-, Signal recognition particle 54 kDa protein	-2.43958	-2.78865	-0.35091	0.445748	0.1-1.0%
CL0123	HTH	37	31	1.88637	Q9NVS2	MRPS18A	39S ribosomal protein S18a, mitochondrial, MRP-S18-a, Mrps18a, S18mt-a, 39S ribosomal protein S18-3, mitochondrial, MRP-S18-3, Mitochondrial large ribosomal subunit protein bS18a, Mitochondrial large ribosomal subunit protein mL66	-2.22239	-1.37654	0.928103	8.47429	1.0-10.0%		CL0123	HTH	24	31	1.88637	Q99543	DNAJC2	DnaJ homolog subfamily C member 2, M-phase phosphoprotein 11, Zuotin-related factor 1	-2.23899	-2.67128	-0.389763	0.407603	0.1-1.0%
CL0123	HTH	37	31	1.88637	Q7Z2W4	ZC3HAV1	Zinc finger CCCH-type antiviral protein 1, ADP-ribosyltransferase diphtheria toxin-like 13, ARTD13, Inactive Poly [ADP-ribose] polymerase 13, PARP13, Zinc finger CCCH domain-containing protein 2, Zinc finger antiviral protein, ZAP	-1.53752	-0.790168	0.815811	6.54351	1.0-10.0%		CL0123	HTH	24	31	1.88637	Q15149	PLEC	Plectin, PCN, PLTN, Hemidesmosomal protein 1, HD1, Plectin-1	-0.592997	-1.01685	-0.456401	0.349622	0.1-1.0%
CL0123	HTH	37	31	1.88637	Q9BVS4	RIOK2	Serine/threonine-protein kinase RIO2, 2.7.11.1, RIO kinase 2	-1.97939	-1.39576	0.67769	4.76091	1.0-10.0%		CL0123	HTH	24	31	1.88637	P55010	EIF5	Eukaryotic translation initiation factor 5, eIF-5	-1.79518	-2.62304	-0.737703	0.182935	0.1-1.0%
CL0123	HTH	37	31	1.88637	Q6PKG0	LARP1	La-related protein 1, La ribonucleoprotein domain family member 1	-1.60698	-1.1285	0.557645	3.61115	1.0-10.0%		CL0123	HTH	24	31	1.88637	Q8IYB8	SUPV3L1	ATP-dependent RNA helicase SUPV3L1, mitochondrial, 3.6.4.13, Suppressor of var1 3-like protein 1, SUV3-like protein 1	-2.7544	-3.55163	-0.853648	0.140072	0.1-1.0%
CL0123	HTH	37	31	1.88637	Q71RC2	LARP4	La-related protein 4, La ribonucleoprotein domain family member 4	-1.83366	-1.34622	0.537857	3.4503	1.0-10.0%		CL0123	HTH	24	31	1.88637	P39019	RPS19	40S ribosomal protein S19, Small ribosomal subunit protein eS19	-0.657541	-1.62541	-0.859285	0.138266	0.1-1.0%
CL0123	HTH	37	31	1.88637	Q14152	EIF3A	Eukaryotic translation initiation factor 3 subunit A, eIF3a, Eukaryotic translation initiation factor 3 subunit 10, eIF-3-theta, eIF3 p167, eIF3 p180, eIF3 p185	-0.895077	-0.448298	0.519576	3.30808	1.0-10.0%		CL0123	HTH	24	31	1.88637	Q12789	GTF3C1	General transcription factor 3C polypeptide 1, TF3C-alpha, TFIIIC box B-binding subunit, Transcription factor IIIC 220 kDa subunit, TFIIIC 220 kDa subunit, TFIIIC220, Transcription factor IIIC subunit alpha	-2.57667	-3.57833	-0.986506	0.103156	0.1-1.0%
CL0123	HTH	37	31	1.88637	P05455	SSB	Lupus La protein, La autoantigen, La ribonucleoprotein, Sjoegren syndrome type B antigen, SS-B	-1.4811	-1.09113	0.483401	3.04369	1.0-10.0%		CL0123	HTH	24	31	1.88637	Q9H0A0	NAT10	RNA cytidine acetyltransferase, 2.3.1.-, 18S rRNA cytosine acetyltransferase, N-acetyltransferase 10, N-acetyltransferase-like protein, hALP	-1.4432	-2.0694	-1.05328	0.0884545	0.01-0.1%
CL0123	HTH	37	31	1.88637	Q92615	LARP4B	La-related protein 4B, La ribonucleoprotein domain family member 4B, La ribonucleoprotein domain family member 5, La-related protein 5	-2.48925	-2.10089	0.471045	2.95832	1.0-10.0%		CL0123	HTH	24	31	1.88637	P20042	EIF2S2	Eukaryotic translation initiation factor 2 subunit 2, Eukaryotic translation initiation factor 2 subunit beta, eIF-2-beta	-1.34793	-2.50663	-1.14889	0.0709753	0.01-0.1%
CL0123	HTH	37	31	1.88637	Q5TC82	RC3H1	Roquin-1, Roquin, 2.3.2.27, RING finger and C3H zinc finger protein 1, RING finger and CCCH-type zinc finger domain-containing protein 1, RING finger protein 198	-2.87008	-2.52151	0.366916	2.32764	1.0-10.0%		CL0123	HTH	24	31	1.88637	P60228	EIF3E	Eukaryotic translation initiation factor 3 subunit E, eIF3e, Eukaryotic translation initiation factor 3 subunit 6, Viral integration site protein INT-6 homolog, eIF-3 p48	-1.33072	-2.49168	-1.17571	0.0667251	0.01-0.1%
CL0123	HTH	37	31	1.88637	Q99613	EIF3C	Eukaryotic translation initiation factor 3 subunit C, eIF3c, Eukaryotic translation initiation factor 3 subunit 8, eIF3 p110	-1.1506	-0.895396	0.298136	1.98671	1.0-10.0%		CL0123	HTH	24	31	1.88637	P62851	RPS25	40S ribosomal protein S25, Small ribosomal subunit protein eS25	-0.824386	-2.05622	-1.18809	0.0648507	0.01-0.1%
CL0123	HTH	37	31	1.88637	P55265	ADAR	Double-stranded RNA-specific adenosine deaminase, DRADA, 3.5.4.37, 136 kDa double-stranded RNA-binding protein, p136, Interferon-inducible protein 4, IFI-4, K88DSRBP	-1.47793	-1.32702	0.228179	1.69114	1.0-10.0%		CL0123	HTH	24	31	1.88637	P31327	CPS1	Carbamoyl-phosphate synthase [ammonia], mitochondrial, 6.3.4.16, Carbamoyl-phosphate synthetase I, CPSase I	-0.590244	-1.73084	-1.31784	0.0481017	0.01-0.1%
CL0123	HTH	37	31	1.88637	Q9Y285	FARSA	Phenylalanine--tRNA ligase alpha subunit, 6.1.1.20, CML33, Phenylalanyl-tRNA synthetase alpha subunit, PheRS	-1.79037	-1.89789	-0.0365312	0.919324	0.1-1.0%		CL0123	HTH	24	31	1.88637	O00231	PSMD11	26S proteasome non-ATPase regulatory subunit 11, 26S proteasome regulatory subunit RPN6, 26S proteasome regulatory subunit S9, 26S proteasome regulatory subunit p44.5	-1.40313	-2.51809	-1.45771	0.034857	0.01-0.1%
CL0123	HTH	37	31	1.88637	P46783	RPS10	40S ribosomal protein S10, Small ribosomal subunit protein eS10	-1.15993	-1.38012	-0.10929	0.777517	0.1-1.0%		CL0123	HTH	24	31	1.88637	Q13619	CUL4A	Cullin-4A, CUL-4A	-1.57695	-3.3012	-1.98072	0.0104539	0.01-0.1%
CL0123	HTH	37	31	1.88637	P27708	CAD	CAD protein, Glutamine-dependent carbamoyl-phosphate synthase, 6.3.5.5, Aspartate carbamoyltransferase, 2.1.3.2, Dihydroorotase, 3.5.2.3	-1.35296	-1.06691	-0.124934	0.750008	0.1-1.0%		CL0016	PKinase	25	18	1.77919	O14730	RIOK3	Serine/threonine-protein kinase RIO3, 2.7.11.1, RIO kinase 3, sudD homolog	-4.01182	-3.12246	1.09822	12.5376	>10.0%
CL0123	HTH	37	31	1.88637	O60869	EDF1	Endothelial differentiation-related factor 1, EDF-1, Multiprotein-bridging factor 1, MBF1	-1.39044	-1.72194	-0.216009	0.608122	0.1-1.0%		CL0016	PKinase	25	18	1.77919	O14578	CIT	Citron Rho-interacting kinase, CRIK, 2.7.11.1, Serine/threonine-protein kinase 21	-3.73977	-2.9699	0.719413	5.24098	1.0-10.0%
CL0123	HTH	37	31	1.88637	P54132	BLM	RecQ-like DNA helicase BLM, 3.6.4.12, Bloom syndrome protein, DNA helicase, RecQ-like type 2, RecQ2, RecQ protein-like 3	-3.36539	-3.7006	-0.286915	0.516517	0.1-1.0%		CL0016	PKinase	25	18	1.77919	Q9BVS4	RIOK2	Serine/threonine-protein kinase RIO2, 2.7.11.1, RIO kinase 2	-1.97939	-1.39576	0.67769	4.76091	1.0-10.0%
CL0123	HTH	37	31	1.88637	P61011	SRP54	Signal recognition particle subunit SRP54, 3.6.5.-, Signal recognition particle 54 kDa protein	-2.43958	-2.78865	-0.35091	0.445748	0.1-1.0%		CL0016	PKinase	25	18	1.77919	Q9NYL2	MAP3K20	Mitogen-activated protein kinase kinase kinase 20, 2.7.11.25, Human cervical cancer suppressor gene 4 protein, HCCS-4, Leucine zipper- and sterile alpha motif-containing kinase, MLK-like mitogen-activated protein triple kinase, Mitogen-activated protein kinase kinase kinase MLT, Mixed lineage kinase 7, Mixed lineage kinase-related kinase, MLK-related kinase, MRK, Sterile alpha motif- and leucine …	-2.98835	-2.50395	0.529237	3.38249	1.0-10.0%
CL0123	HTH	37	31	1.88637	Q99543	DNAJC2	DnaJ homolog subfamily C member 2, M-phase phosphoprotein 11, Zuotin-related factor 1	-2.23899	-2.67128	-0.389763	0.407603	0.1-1.0%		CL0016	PKinase	25	18	1.77919	P50750	CDK9	Cyclin-dependent kinase 9, 2.7.11.22, 2.7.11.23, C-2K, Cell division cycle 2-like protein kinase 4, Cell division protein kinase 9, Serine/threonine-protein kinase PITALRE, Tat-associated kinase complex catalytic subunit	-2.75379	-2.70675	0.150935	1.41558	1.0-10.0%
CL0123	HTH	37	31	1.88637	Q15149	PLEC	Plectin, PCN, PLTN, Hemidesmosomal protein 1, HD1, Plectin-1	-0.592997	-1.01685	-0.456401	0.349622	0.1-1.0%		CL0016	PKinase	25	18	1.77919	O96013	PAK4	Serine/threonine-protein kinase PAK 4, 2.7.11.1, p21-activated kinase 4, PAK-4	-3.50298	-3.6837	-0.0601505	0.870662	0.1-1.0%
CL0123	HTH	37	31	1.88637	P55010	EIF5	Eukaryotic translation initiation factor 5, eIF-5	-1.79518	-2.62304	-0.737703	0.182935	0.1-1.0%		CL0016	PKinase	25	18	1.77919	P19525	EIF2AK2	Interferon-induced, double-stranded RNA-activated protein kinase, 2.7.11.1, Eukaryotic translation initiation factor 2-alpha kinase 2, eIF-2A protein kinase 2, Interferon-inducible RNA-dependent protein kinase, P1/eIF-2A protein kinase, Protein kinase RNA-activated, PKR, Protein kinase R, Tyrosine-protein kinase EIF2AK2, 2.7.10.2, p68 kinase	-2.07258	-2.2524	-0.0886375	0.815385	0.1-1.0%
CL0123	HTH	37	31	1.88637	Q8IYB8	SUPV3L1	ATP-dependent RNA helicase SUPV3L1, mitochondrial, 3.6.4.13, Suppressor of var1 3-like protein 1, SUV3-like protein 1	-2.7544	-3.55163	-0.853648	0.140072	0.1-1.0%		CL0016	PKinase	25	18	1.77919	P33981	TTK	Dual specificity protein kinase TTK, 2.7.12.1, Phosphotyrosine picked threonine-protein kinase, PYT	-3.27457	-3.38658	-0.0930974	0.807054	0.1-1.0%
CL0123	HTH	37	31	1.88637	P39019	RPS19	40S ribosomal protein S19, Small ribosomal subunit protein eS19	-0.657541	-1.62541	-0.859285	0.138266	0.1-1.0%		CL0016	PKinase	25	18	1.77919	Q9BRS2	RIOK1	Serine/threonine-protein kinase RIO1, 2.7.11.1, 3.6.3.-, RIO kinase 1	-2.38813	-2.52356	-0.13169	0.738432	0.1-1.0%
CL0123	HTH	37	31	1.88637	Q12789	GTF3C1	General transcription factor 3C polypeptide 1, TF3C-alpha, TFIIIC box B-binding subunit, Transcription factor IIIC 220 kDa subunit, TFIIIC 220 kDa subunit, TFIIIC220, Transcription factor IIIC subunit alpha	-2.57667	-3.57833	-0.986506	0.103156	0.1-1.0%		CL0016	PKinase	25	18	1.77919	Q96SB4	SRPK1	SRSF protein kinase 1, 2.7.11.1, SFRS protein kinase 1, Serine/arginine-rich protein-specific kinase 1, SR-protein-specific kinase 1	-1.94635	-2.45238	-0.420012	0.380179	0.1-1.0%
CL0123	HTH	37	31	1.88637	Q9H0A0	NAT10	RNA cytidine acetyltransferase, 2.3.1.-, 18S rRNA cytosine acetyltransferase, N-acetyltransferase 10, N-acetyltransferase-like protein, hALP	-1.4432	-2.0694	-1.05328	0.0884545	0.01-0.1%		CL0016	PKinase	25	18	1.77919	P78527	PRKDC	DNA-dependent protein kinase catalytic subunit, DNA-PK catalytic subunit, DNA-PKcs, 2.7.11.1, DNPK1, p460	-0.263688	-0.826513	-0.648696	0.224545	0.1-1.0%
CL0123	HTH	37	31	1.88637	P20042	EIF2S2	Eukaryotic translation initiation factor 2 subunit 2, Eukaryotic translation initiation factor 2 subunit beta, eIF-2-beta	-1.34793	-2.50663	-1.14889	0.0709753	0.01-0.1%		CL0016	PKinase	25	18	1.77919	O75962	TRIO	Triple functional domain protein, 2.7.11.1, PTPRF-interacting protein	-3.40354	-3.77632	-0.651686	0.223005	0.1-1.0%
CL0123	HTH	37	31	1.88637	P60228	EIF3E	Eukaryotic translation initiation factor 3 subunit E, eIF3e, Eukaryotic translation initiation factor 3 subunit 6, Viral integration site protein INT-6 homolog, eIF-3 p48	-1.33072	-2.49168	-1.17571	0.0667251	0.01-0.1%		CL0016	PKinase	25	18	1.77919	P46734	MAP2K3	Dual specificity mitogen-activated protein kinase kinase 3, MAP kinase kinase 3, MAPKK 3, 2.7.12.2, MAPK/ERK kinase 3, MEK 3, Stress-activated protein kinase kinase 2, SAPK kinase 2, SAPKK-2, SAPKK2	-2.44569	-3.14939	-0.742491	0.180929	0.1-1.0%
CL0123	HTH	37	31	1.88637	P62851	RPS25	40S ribosomal protein S25, Small ribosomal subunit protein eS25	-0.824386	-2.05622	-1.18809	0.0648507	0.01-0.1%		CL0016	PKinase	25	18	1.77919	P00533	EGFR	Epidermal growth factor receptor, 2.7.10.1, Proto-oncogene c-ErbB-1, Receptor tyrosine-protein kinase erbB-1	-2.01767	-2.63776	-0.798329	0.1591	0.1-1.0%
CL0123	HTH	37	31	1.88637	P31327	CPS1	Carbamoyl-phosphate synthase [ammonia], mitochondrial, 6.3.4.16, Carbamoyl-phosphate synthetase I, CPSase I	-0.590244	-1.73084	-1.31784	0.0481017	0.01-0.1%		CL0016	PKinase	25	18	1.77919	Q16513	PKN2	Serine/threonine-protein kinase N2, 2.7.11.13, PKN gamma, Protein kinase C-like 2, Protein-kinase C-related kinase 2	-1.89305	-2.77478	-0.939233	0.115018	0.1-1.0%
CL0123	HTH	37	31	1.88637	O00231	PSMD11	26S proteasome non-ATPase regulatory subunit 11, 26S proteasome regulatory subunit RPN6, 26S proteasome regulatory subunit S9, 26S proteasome regulatory subunit p44.5	-1.40313	-2.51809	-1.45771	0.034857	0.01-0.1%		CL0016	PKinase	25	18	1.77919	Q96KG9	SCYL1	N-terminal kinase-like protein, Coated vesicle-associated kinase of 90 kDa, SCY1-like protein 1, Telomerase regulation-associated protein, Telomerase transcriptional element-interacting factor, Teratoma-associated tyrosine kinase	-2.64755	-3.44568	-0.942251	0.114222	0.1-1.0%
CL0123	HTH	37	31	1.88637	Q13619	CUL4A	Cullin-4A, CUL-4A	-1.57695	-3.3012	-1.98072	0.0104539	0.01-0.1%		CL0016	PKinase	25	18	1.77919	Q7KZI7	MARK2	Serine/threonine-protein kinase MARK2, 2.7.11.1, 2.7.11.26, ELKL motif kinase 1, EMK-1, MAP/microtubule affinity-regulating kinase 2, PAR1 homolog, PAR1 homolog b, Par-1b, Par1b	-2.4214	-3.8542	-1.40309	0.0395285	0.01-0.1%
CL0016	PKinase	38	18	1.77919	O14730	RIOK3	Serine/threonine-protein kinase RIO3, 2.7.11.1, RIO kinase 3, sudD homolog	-4.01182	-3.12246	1.09822	12.5376	>10.0%		CL0016	PKinase	25	18	1.77919	P06493	CDK1	Cyclin-dependent kinase 1, CDK1, 2.7.11.22, 2.7.11.23, Cell division control protein 2 homolog, Cell division protein kinase 1, p34 protein kinase	-1.15844	-2.79909	-1.70217	0.0198534	0.01-0.1%
CL0016	PKinase	38	18	1.77919	O14578	CIT	Citron Rho-interacting kinase, CRIK, 2.7.11.1, Serine/threonine-protein kinase 21	-3.73977	-2.9699	0.719413	5.24098	1.0-10.0%		CL0236	PDDEXK	26	6	1.73347	Q9BZE1	MRPL37	39S ribosomal protein L37, mitochondrial, L37mt, MRP-L37, 39S ribosomal protein L2, mitochondrial, L2mt, MRP-L2, Mitochondrial large ribosomal subunit protein mL37	-2.15384	-1.52701	0.684653	4.83786	1.0-10.0%
CL0016	PKinase	38	18	1.77919	Q9BVS4	RIOK2	Serine/threonine-protein kinase RIO2, 2.7.11.1, RIO kinase 2	-1.97939	-1.39576	0.67769	4.76091	1.0-10.0%		CL0236	PDDEXK	26	6	1.73347	Q9NYY8	FASTKD2	FAST kinase domain-containing protein 2, mitochondrial	-2.33087	-2.11546	0.257657	1.80991	1.0-10.0%
CL0016	PKinase	38	18	1.77919	Q9NYL2	MAP3K20	Mitogen-activated protein kinase kinase kinase 20, 2.7.11.25, Human cervical cancer suppressor gene 4 protein, HCCS-4, Leucine zipper- and sterile alpha motif-containing kinase, MLK-like mitogen-activated protein triple kinase, Mitogen-activated protein kinase kinase kinase MLT, Mixed lineage kinase 7, Mixed lineage kinase-related kinase, MLK-related kinase, MRK, Sterile alpha motif- and leucine …	-2.98835	-2.50395	0.529237	3.38249	1.0-10.0%		CL0236	PDDEXK	26	6	1.73347	O15371	EIF3D	Eukaryotic translation initiation factor 3 subunit D, eIF3d, Eukaryotic translation initiation factor 3 subunit 7, eIF-3-zeta, eIF3 p66	-1.3265	-1.16883	0.253434	1.7924	1.0-10.0%
CL0016	PKinase	38	18	1.77919	P50750	CDK9	Cyclin-dependent kinase 9, 2.7.11.22, 2.7.11.23, C-2K, Cell division cycle 2-like protein kinase 4, Cell division protein kinase 9, Serine/threonine-protein kinase PITALRE, Tat-associated kinase complex catalytic subunit	-2.75379	-2.70675	0.150935	1.41558	1.0-10.0%		CL0236	PDDEXK	26	6	1.73347	Q969Z0	TBRG4	FAST kinase domain-containing protein 4, Cell cycle progression restoration protein 2, Cell cycle progression protein 2, Protein TBRG4, Transforming growth factor beta regulator 4	-2.04911	-2.01919	0.0342034	1.08194	1.0-10.0%
CL0016	PKinase	38	18	1.77919	O96013	PAK4	Serine/threonine-protein kinase PAK 4, 2.7.11.1, p21-activated kinase 4, PAK-4	-3.50298	-3.6837	-0.0601505	0.870662	0.1-1.0%		CL0236	PDDEXK	26	6	1.73347	Q9NP92	MRPS30	39S ribosomal protein S30, mitochondrial, MRP-S30, S30mt, Mitochondrial large ribosomal subunit protein mL65, Mitochondrial large ribosomal subunit protein mS30, Programmed cell death protein 9	-2.66372	-2.79359	-0.0982359	0.797561	0.1-1.0%
CL0016	PKinase	38	18	1.77919	P19525	EIF2AK2	Interferon-induced, double-stranded RNA-activated protein kinase, 2.7.11.1, Eukaryotic translation initiation factor 2-alpha kinase 2, eIF-2A protein kinase 2, Interferon-inducible RNA-dependent protein kinase, P1/eIF-2A protein kinase, Protein kinase RNA-activated, PKR, Protein kinase R, Tyrosine-protein kinase EIF2AK2, 2.7.10.2, p68 kinase	-2.07258	-2.2524	-0.0886375	0.815385	0.1-1.0%		CL0236	PDDEXK	26	6	1.73347	Q7L8L6	FASTKD5	FAST kinase domain-containing protein 5, mitochondrial	-3.08669	-4.10707	-1.09061	0.081169	0.01-0.1%
CL0016	PKinase	38	18	1.77919	P33981	TTK	Dual specificity protein kinase TTK, 2.7.12.1, Phosphotyrosine picked threonine-protein kinase, PYT	-3.27457	-3.38658	-0.0930974	0.807054	0.1-1.0%		CL0004	Concanavalin	27	10	1.72039	Q00839	HNRNPU	Heterogeneous nuclear ribonucleoprotein U, hnRNP U, GRIP120, Nuclear p120 ribonucleoprotein, Scaffold-attachment factor A, SAF-A, p120, pp120	-0.423801	0.248723	0.767511	5.85479	1.0-10.0%
CL0016	PKinase	38	18	1.77919	Q9BRS2	RIOK1	Serine/threonine-protein kinase RIO1, 2.7.11.1, 3.6.3.-, RIO kinase 1	-2.38813	-2.52356	-0.13169	0.738432	0.1-1.0%		CL0004	Concanavalin	27	10	1.72039	Q1KMD3	HNRNPUL2	Heterogeneous nuclear ribonucleoprotein U-like protein 2, Scaffold-attachment factor A2, SAF-A2	-1.9465	-1.33716	0.685736	4.84994	1.0-10.0%
CL0016	PKinase	38	18	1.77919	Q96SB4	SRPK1	SRSF protein kinase 1, 2.7.11.1, SFRS protein kinase 1, Serine/arginine-rich protein-specific kinase 1, SR-protein-specific kinase 1	-1.94635	-2.45238	-0.420012	0.380179	0.1-1.0%		CL0004	Concanavalin	27	10	1.72039	Q9BUJ2	HNRNPUL1	Heterogeneous nuclear ribonucleoprotein U-like protein 1, Adenovirus early region 1B-associated protein 5, E1B-55 kDa-associated protein 5, E1B-AP5	-1.19725	-1.01726	0.282305	1.9156	1.0-10.0%
CL0016	PKinase	38	18	1.77919	P78527	PRKDC	DNA-dependent protein kinase catalytic subunit, DNA-PK catalytic subunit, DNA-PKcs, 2.7.11.1, DNPK1, p460	-0.263688	-0.826513	-0.648696	0.224545	0.1-1.0%		CL0004	Concanavalin	27	10	1.72039	Q14258	TRIM25	E3 ubiquitin/ISG15 ligase TRIM25, 6.3.2.n3, Estrogen-responsive finger protein, RING finger protein 147, RING-type E3 ubiquitin transferase, 2.3.2.27, RING-type E3 ubiquitin transferase TRIM25, Tripartite motif-containing protein 25, Ubiquitin/ISG15-conjugating enzyme TRIM25, Zinc finger protein 147	-1.71663	-1.51036	0.242975	1.74975	1.0-10.0%
CL0016	PKinase	38	18	1.77919	O75962	TRIO	Triple functional domain protein, 2.7.11.1, PTPRF-interacting protein	-3.40354	-3.77632	-0.651686	0.223005	0.1-1.0%		CL0004	Concanavalin	27	10	1.72039	O15230	LAMA5	Laminin subunit alpha-5, Laminin-10 subunit alpha, Laminin-11 subunit alpha, Laminin-15 subunit alpha	-3.5183	-3.24084	0.124636	1.3324	1.0-10.0%
CL0016	PKinase	38	18	1.77919	P46734	MAP2K3	Dual specificity mitogen-activated protein kinase kinase 3, MAP kinase kinase 3, MAPKK 3, 2.7.12.2, MAPK/ERK kinase 3, MEK 3, Stress-activated protein kinase kinase 2, SAPK kinase 2, SAPKK-2, SAPKK2	-2.44569	-3.14939	-0.742491	0.180929	0.1-1.0%		CL0004	Concanavalin	27	10	1.72039	Q92499	DDX1	ATP-dependent RNA helicase DDX1, 3.6.4.13, DEAD box protein 1, DEAD box protein retinoblastoma, DBP-RB	-1.53292	-1.78383	-0.176154	0.66657	0.1-1.0%
CL0016	PKinase	38	18	1.77919	P00533	EGFR	Epidermal growth factor receptor, 2.7.10.1, Proto-oncogene c-ErbB-1, Receptor tyrosine-protein kinase erbB-1	-2.01767	-2.63776	-0.798329	0.1591	0.1-1.0%		CL0004	Concanavalin	27	10	1.72039	P25391	LAMA1	Laminin subunit alpha-1, Laminin A chain, Laminin-1 subunit alpha, Laminin-3 subunit alpha, S-laminin subunit alpha, S-LAM alpha	-3.07034	-3.25901	-0.38078	0.416122	0.1-1.0%
CL0016	PKinase	38	18	1.77919	Q16513	PKN2	Serine/threonine-protein kinase N2, 2.7.11.13, PKN gamma, Protein kinase C-like 2, Protein-kinase C-related kinase 2	-1.89305	-2.77478	-0.939233	0.115018	0.1-1.0%		CL0004	Concanavalin	27	10	1.72039	Q12899	TRIM26	Tripartite motif-containing protein 26, 2.3.2.27, Acid finger protein, AFP, RING finger protein 95, Zinc finger protein 173	-3.18122	-3.70202	-0.449349	0.355346	0.1-1.0%
CL0016	PKinase	38	18	1.77919	Q96KG9	SCYL1	N-terminal kinase-like protein, Coated vesicle-associated kinase of 90 kDa, SCY1-like protein 1, Telomerase regulation-associated protein, Telomerase transcriptional element-interacting factor, Teratoma-associated tyrosine kinase	-2.64755	-3.44568	-0.942251	0.114222	0.1-1.0%		CL0004	Concanavalin	27	10	1.72039	O15344	MID1	E3 ubiquitin-protein ligase Midline-1, 2.3.2.27, Midin, Putative transcription factor XPRF, RING finger protein 59, RING finger protein Midline-1, RING-type E3 ubiquitin transferase Midline-1, Tripartite motif-containing protein 18	-3.1729	-4.22407	-1.20885	0.0618224	0.01-0.1%
CL0016	PKinase	38	18	1.77919	Q7KZI7	MARK2	Serine/threonine-protein kinase MARK2, 2.7.11.1, 2.7.11.26, ELKL motif kinase 1, EMK-1, MAP/microtubule affinity-regulating kinase 2, PAR1 homolog, PAR1 homolog b, Par-1b, Par1b	-2.4214	-3.8542	-1.40309	0.0395285	0.01-0.1%		CL0004	Concanavalin	27	10	1.72039	P27797	CALR	Calreticulin, CRP55, Calregulin, Endoplasmic reticulum resident protein 60, ERp60, HACBP, grp60	-0.902624	-2.65756	-2.81637	0.00152628	<0.01%
CL0016	PKinase	38	18	1.77919	P06493	CDK1	Cyclin-dependent kinase 1, CDK1, 2.7.11.22, 2.7.11.23, Cell division control protein 2 homolog, Cell division protein kinase 1, p34 protein kinase	-1.15844	-2.79909	-1.70217	0.0198534	0.01-0.1%		CL0306	HeH	28	15	1.55085	Q00839	HNRNPU	Heterogeneous nuclear ribonucleoprotein U, hnRNP U, GRIP120, Nuclear p120 ribonucleoprotein, Scaffold-attachment factor A, SAF-A, p120, pp120	-0.423801	0.248723	0.767511	5.85479	1.0-10.0%
CL0236	PDDEXK	39	6	1.73347	Q9BZE1	MRPL37	39S ribosomal protein L37, mitochondrial, L37mt, MRP-L37, 39S ribosomal protein L2, mitochondrial, L2mt, MRP-L2, Mitochondrial large ribosomal subunit protein mL37	-2.15384	-1.52701	0.684653	4.83786	1.0-10.0%		CL0306	HeH	28	15	1.55085	Q1KMD3	HNRNPUL2	Heterogeneous nuclear ribonucleoprotein U-like protein 2, Scaffold-attachment factor A2, SAF-A2	-1.9465	-1.33716	0.685736	4.84994	1.0-10.0%
CL0236	PDDEXK	39	6	1.73347	Q9NYY8	FASTKD2	FAST kinase domain-containing protein 2, mitochondrial	-2.33087	-2.11546	0.257657	1.80991	1.0-10.0%		CL0306	HeH	28	15	1.55085	Q14151	SAFB2	Scaffold attachment factor B2, SAF-B2	-2.14539	-1.69231	0.501251	3.1714	1.0-10.0%
CL0236	PDDEXK	39	6	1.73347	O15371	EIF3D	Eukaryotic translation initiation factor 3 subunit D, eIF3d, Eukaryotic translation initiation factor 3 subunit 7, eIF-3-zeta, eIF3 p66	-1.3265	-1.16883	0.253434	1.7924	1.0-10.0%		CL0306	HeH	28	15	1.55085	Q15424	SAFB	Scaffold attachment factor B1, SAF-B, SAF-B1, HSP27 estrogen response element-TATA box-binding protein, HSP27 ERE-TATA-binding protein	-1.61879	-1.28798	0.385185	2.42764	1.0-10.0%
CL0236	PDDEXK	39	6	1.73347	Q969Z0	TBRG4	FAST kinase domain-containing protein 4, Cell cycle progression restoration protein 2, Cell cycle progression protein 2, Protein TBRG4, Transforming growth factor beta regulator 4	-2.04911	-2.01919	0.0342034	1.08194	1.0-10.0%		CL0306	HeH	28	15	1.55085	Q9NWH9	SLTM	SAFB-like transcription modulator, Modulator of estrogen-induced transcription	-2.03213	-1.76691	0.361736	2.30004	1.0-10.0%
CL0236	PDDEXK	39	6	1.73347	Q9NP92	MRPS30	39S ribosomal protein S30, mitochondrial, MRP-S30, S30mt, Mitochondrial large ribosomal subunit protein mL65, Mitochondrial large ribosomal subunit protein mS30, Programmed cell death protein 9	-2.66372	-2.79359	-0.0982359	0.797561	0.1-1.0%		CL0306	HeH	28	15	1.55085	Q9BUJ2	HNRNPUL1	Heterogeneous nuclear ribonucleoprotein U-like protein 1, Adenovirus early region 1B-associated protein 5, E1B-55 kDa-associated protein 5, E1B-AP5	-1.19725	-1.01726	0.282305	1.9156	1.0-10.0%
CL0236	PDDEXK	39	6	1.73347	Q7L8L6	FASTKD5	FAST kinase domain-containing protein 5, mitochondrial	-3.08669	-4.10707	-1.09061	0.081169	0.01-0.1%		CL0306	HeH	28	15	1.55085	Q86XL3	ANKLE2	Ankyrin repeat and LEM domain-containing protein 2, LEM domain-containing protein 4	-2.81934	-2.82361	-0.0503274	0.890579	0.1-1.0%
CL0004	Concanavalin	40	10	1.72039	Q00839	HNRNPU	Heterogeneous nuclear ribonucleoprotein U, hnRNP U, GRIP120, Nuclear p120 ribonucleoprotein, Scaffold-attachment factor A, SAF-A, p120, pp120	-0.423801	0.248723	0.767511	5.85479	1.0-10.0%		CL0306	HeH	28	15	1.55085	P12956	XRCC6	X-ray repair cross-complementing protein 6, 3.6.4.-, 4.2.99.-, 5'-deoxyribose-5-phosphate lyase Ku70, 5'-dRP lyase Ku70, 70 kDa subunit of Ku antigen, ATP-dependent DNA helicase 2 subunit 1, ATP-dependent DNA helicase II 70 kDa subunit, CTC box-binding factor 75 kDa subunit, CTC75, CTCBF, DNA repair protein XRCC6, Lupus Ku autoantigen protein p70, Ku70, Thyroid-lupus autoantigen, TLAA, X-ray repa…	-1.07232	-1.37506	-0.2349	0.582238	0.1-1.0%
CL0004	Concanavalin	40	10	1.72039	Q1KMD3	HNRNPUL2	Heterogeneous nuclear ribonucleoprotein U-like protein 2, Scaffold-attachment factor A2, SAF-A2	-1.9465	-1.33716	0.685736	4.84994	1.0-10.0%		CL0306	HeH	28	15	1.55085	Q13435	SF3B2	Splicing factor 3B subunit 2, Pre-mRNA-splicing factor SF3b 145 kDa subunit, SF3b145, Spliceosome-associated protein 145, SAP 145	-1.64435	-1.95692	-0.274535	0.531454	0.1-1.0%
CL0004	Concanavalin	40	10	1.72039	Q9BUJ2	HNRNPUL1	Heterogeneous nuclear ribonucleoprotein U-like protein 1, Adenovirus early region 1B-associated protein 5, E1B-55 kDa-associated protein 5, E1B-AP5	-1.19725	-1.01726	0.282305	1.9156	1.0-10.0%		CL0306	HeH	28	15	1.55085	Q8IX12	CCAR1	Cell division cycle and apoptosis regulator protein 1, Cell cycle and apoptosis regulatory protein 1, CARP-1, Death inducer with SAP domain	-2.03837	-2.54188	-0.614735	0.242809	0.1-1.0%
CL0004	Concanavalin	40	10	1.72039	Q14258	TRIM25	E3 ubiquitin/ISG15 ligase TRIM25, 6.3.2.n3, Estrogen-responsive finger protein, RING finger protein 147, RING-type E3 ubiquitin transferase, 2.3.2.27, RING-type E3 ubiquitin transferase TRIM25, Tripartite motif-containing protein 25, Ubiquitin/ISG15-conjugating enzyme TRIM25, Zinc finger protein 147	-1.71663	-1.51036	0.242975	1.74975	1.0-10.0%		CL0306	HeH	28	15	1.55085	P09874	PARP1	Poly [ADP-ribose] polymerase, 2.4.2.30	-1.07903	-1.78142	-0.689837	0.20425	0.1-1.0%
CL0004	Concanavalin	40	10	1.72039	O15230	LAMA5	Laminin subunit alpha-5, Laminin-10 subunit alpha, Laminin-11 subunit alpha, Laminin-15 subunit alpha	-3.5183	-3.24084	0.124636	1.3324	1.0-10.0%		CL0306	HeH	28	15	1.55085	Q9UKV3	ACIN1	Apoptotic chromatin condensation inducer in the nucleus, Acinus	-1.99625	-2.91946	-1.02097	0.0952869	0.01-0.1%
CL0004	Concanavalin	40	10	1.72039	Q92499	DDX1	ATP-dependent RNA helicase DDX1, 3.6.4.13, DEAD box protein 1, DEAD box protein retinoblastoma, DBP-RB	-1.53292	-1.78383	-0.176154	0.66657	0.1-1.0%		CL0306	HeH	28	15	1.55085	Q9ULT8	HECTD1	E3 ubiquitin-protein ligase HECTD1, 2.3.2.26, E3 ligase for inhibin receptor, EULIR, HECT domain-containing protein 1	-2.35756	-3.4021	-1.14264	0.0720039	0.01-0.1%
CL0004	Concanavalin	40	10	1.72039	P25391	LAMA1	Laminin subunit alpha-1, Laminin A chain, Laminin-1 subunit alpha, Laminin-3 subunit alpha, S-laminin subunit alpha, S-LAM alpha	-3.07034	-3.25901	-0.38078	0.416122	0.1-1.0%		CL0306	HeH	28	15	1.55085	P82979	SARNP	SAP domain-containing ribonucleoprotein, Cytokine-induced protein of 29 kDa, Nuclear protein Hcc-1, Proliferation-associated cytokine-inducible protein CIP29	-1.38886	-2.67352	-1.16699	0.0680787	0.01-0.1%
CL0004	Concanavalin	40	10	1.72039	Q12899	TRIM26	Tripartite motif-containing protein 26, 2.3.2.27, Acid finger protein, AFP, RING finger protein 95, Zinc finger protein 173	-3.18122	-3.70202	-0.449349	0.355346	0.1-1.0%		CL0306	HeH	28	15	1.55085	P42166	TMPO	Lamina-associated polypeptide 2, isoform alpha, Thymopoietin isoform alpha, TP alpha, Thymopoietin-related peptide isoform alpha, TPRP isoform alpha	-1.43026	-2.76375	-1.24743	0.0565679	0.01-0.1%
CL0004	Concanavalin	40	10	1.72039	O15344	MID1	E3 ubiquitin-protein ligase Midline-1, 2.3.2.27, Midin, Putative transcription factor XPRF, RING finger protein 59, RING finger protein Midline-1, RING-type E3 ubiquitin transferase Midline-1, Tripartite motif-containing protein 18	-3.1729	-4.22407	-1.20885	0.0618224	0.01-0.1%		CL0020	TPR	29	70	1.51602	Q8TB72	PUM2	Pumilio homolog 2, Pumilio-2	-2.85743	-1.54877	1.38446	24.236	>10.0%
CL0004	Concanavalin	40	10	1.72039	P27797	CALR	Calreticulin, CRP55, Calregulin, Endoplasmic reticulum resident protein 60, ERp60, HACBP, grp60	-0.902624	-2.65756	-2.81637	0.00152628	<0.01%		CL0020	TPR	29	70	1.51602	Q14671	PUM1	Pumilio homolog 1, HsPUM, Pumilio-1	-2.07298	-0.847998	1.30391	20.1331	>10.0%
CL0198	HHH	41	1	1.6824	Q7KZ85	SUPT6H	Transcription elongation factor SPT6, hSPT6, Histone chaperone suppressor of Ty6, Tat-cotransactivator 2 protein, Tat-CT2 protein	-2.15682	-1.97292	0.225931	1.6824	1.0-10.0%		CL0020	TPR	29	70	1.51602	Q9UGR2	ZC3H7B	Zinc finger CCCH domain-containing protein 7B, Rotavirus 'X'-associated non-structural protein, RoXaN	-2.40192	-1.6201	0.878415	7.55814	1.0-10.0%
CL0580	YqgF	42	1	1.6824	Q7KZ85	SUPT6H	Transcription elongation factor SPT6, hSPT6, Histone chaperone suppressor of Ty6, Tat-cotransactivator 2 protein, Tat-CT2 protein	-2.15682	-1.97292	0.225931	1.6824	1.0-10.0%		CL0020	TPR	29	70	1.51602	P42704	LRPPRC	Leucine-rich PPR motif-containing protein, mitochondrial, 130 kDa leucine-rich protein, LRP 130, GP130	-0.794665	-0.0291755	0.821831	6.63485	1.0-10.0%
CL0684	NFACT_RNA-bind	43	1	1.64004	O60524	NEMF	Ribosome quality control complex subunit NEMF, Antigen NY-CO-1, Nuclear export mediator factor, Serologically defined colon cancer antigen 1	-2.51038	-2.31243	0.214855	1.64004	1.0-10.0%		CL0020	TPR	29	70	1.51602	Q14690	PDCD11	Protein RRP5 homolog, NF-kappa-B-binding protein, NFBP, Programmed cell death protein 11	-1.43027	-0.861512	0.651272	4.47994	1.0-10.0%
CL0208	UBC	44	2	1.62708	Q6P158	DHX57	Putative ATP-dependent RNA helicase DHX57, 3.6.4.13, DEAH box protein 57	-2.26362	-1.78831	0.41788	2.61746	1.0-10.0%		CL0020	TPR	29	70	1.51602	O75127	PTCD1	Pentatricopeptide repeat-containing protein 1, mitochondrial	-3.27862	-2.62321	0.629345	4.25937	1.0-10.0%
CL0208	UBC	44	2	1.62708	Q9NR09	BIRC6	Baculoviral IAP repeat-containing protein 6, 2.3.2.27, BIR repeat-containing ubiquitin-conjugating enzyme, BRUCE, RING-type E3 ubiquitin transferase BIRC6, Ubiquitin-conjugating BIR domain enzyme apollon, APOLLON	-3.13384	-3.01218	-0.196069	0.636694	0.1-1.0%		CL0020	TPR	29	70	1.51602	O60306	AQR	RNA helicase aquarius, 3.6.4.13, Intron-binding protein of 160 kDa, IBP160	-2.10288	-1.59878	0.579076	3.79381	1.0-10.0%
CL0306	HeH	45	15	1.55085	Q00839	HNRNPU	Heterogeneous nuclear ribonucleoprotein U, hnRNP U, GRIP120, Nuclear p120 ribonucleoprotein, Scaffold-attachment factor A, SAF-A, p120, pp120	-0.423801	0.248723	0.767511	5.85479	1.0-10.0%		CL0020	TPR	29	70	1.51602	Q96EY7	PTCD3	Pentatricopeptide repeat domain-containing protein 3, mitochondrial, 28S ribosomal protein S39, mitochondrial, MRP-S39, Mitochondrial small ribosomal subunit protein mS39, Transformation-related gene 15 protein, TRG-15	-1.6172	-1.14748	0.554711	3.58683	1.0-10.0%
CL0306	HeH	45	15	1.55085	Q1KMD3	HNRNPUL2	Heterogeneous nuclear ribonucleoprotein U-like protein 2, Scaffold-attachment factor A2, SAF-A2	-1.9465	-1.33716	0.685736	4.84994	1.0-10.0%		CL0020	TPR	29	70	1.51602	Q86TB9	PATL1	Protein PAT1 homolog 1, PAT1-like protein 1, Protein PAT1 homolog b, Pat1b, hPat1b	-2.89647	-2.48849	0.539958	3.46703	1.0-10.0%
CL0306	HeH	45	15	1.55085	Q14151	SAFB2	Scaffold attachment factor B2, SAF-B2	-2.14539	-1.69231	0.501251	3.1714	1.0-10.0%		CL0020	TPR	29	70	1.51602	Q15397	PUM3	Pumilio homolog 3, HBV X-transactivated gene 5 protein, HBV XAg-transactivated protein 5, Minor histocompatibility antigen HA-8, HLA-HA8	-1.89073	-1.5803	0.381106	2.40495	1.0-10.0%
CL0306	HeH	45	15	1.55085	Q15424	SAFB	Scaffold attachment factor B1, SAF-B, SAF-B1, HSP27 estrogen response element-TATA box-binding protein, HSP27 ERE-TATA-binding protein	-1.61879	-1.28798	0.385185	2.42764	1.0-10.0%		CL0020	TPR	29	70	1.51602	O94913	PCF11	Pre-mRNA cleavage complex 2 protein Pcf11, Pre-mRNA cleavage complex II protein Pcf11	-3.64426	-3.32966	0.378737	2.39187	1.0-10.0%
CL0306	HeH	45	15	1.55085	Q9NWH9	SLTM	SAFB-like transcription modulator, Modulator of estrogen-induced transcription	-2.03213	-1.76691	0.361736	2.30004	1.0-10.0%		CL0020	TPR	29	70	1.51602	Q99613	EIF3C	Eukaryotic translation initiation factor 3 subunit C, eIF3c, Eukaryotic translation initiation factor 3 subunit 8, eIF3 p110	-1.1506	-0.895396	0.298136	1.98671	1.0-10.0%
CL0306	HeH	45	15	1.55085	Q9BUJ2	HNRNPUL1	Heterogeneous nuclear ribonucleoprotein U-like protein 1, Adenovirus early region 1B-associated protein 5, E1B-55 kDa-associated protein 5, E1B-AP5	-1.19725	-1.01726	0.282305	1.9156	1.0-10.0%		CL0020	TPR	29	70	1.51602	O43432	EIF4G3	Eukaryotic translation initiation factor 4 gamma 3, eIF-4-gamma 3, eIF-4G 3, eIF4G 3, eIF-4-gamma II, eIF4GII	-3.90936	-3.7983	0.284441	1.92504	1.0-10.0%
CL0306	HeH	45	15	1.55085	Q86XL3	ANKLE2	Ankyrin repeat and LEM domain-containing protein 2, LEM domain-containing protein 4	-2.81934	-2.82361	-0.0503274	0.890579	0.1-1.0%		CL0020	TPR	29	70	1.51602	Q5C9Z4	NOM1	Nucleolar MIF4G domain-containing protein 1, SGD1 homolog	-3.034	-2.66042	0.241298	1.743	1.0-10.0%
CL0306	HeH	45	15	1.55085	P12956	XRCC6	X-ray repair cross-complementing protein 6, 3.6.4.-, 4.2.99.-, 5'-deoxyribose-5-phosphate lyase Ku70, 5'-dRP lyase Ku70, 70 kDa subunit of Ku antigen, ATP-dependent DNA helicase 2 subunit 1, ATP-dependent DNA helicase II 70 kDa subunit, CTC box-binding factor 75 kDa subunit, CTC75, CTCBF, DNA repair protein XRCC6, Lupus Ku autoantigen protein p70, Ku70, Thyroid-lupus autoantigen, TLAA, X-ray repa…	-1.07232	-1.37506	-0.2349	0.582238	0.1-1.0%		CL0020	TPR	29	70	1.51602	O76094	SRP72	Signal recognition particle subunit SRP72, SRP72, Signal recognition particle 72 kDa protein	-2.20039	-2.00482	0.238779	1.73292	1.0-10.0%
CL0306	HeH	45	15	1.55085	Q13435	SF3B2	Splicing factor 3B subunit 2, Pre-mRNA-splicing factor SF3b 145 kDa subunit, SF3b145, Spliceosome-associated protein 145, SAP 145	-1.64435	-1.95692	-0.274535	0.531454	0.1-1.0%		CL0020	TPR	29	70	1.51602	Q9BQ70	TCF25	Transcription factor 25, TCF-25, Nuclear localized protein 1	-3.07424	-2.92616	0.200826	1.58791	1.0-10.0%
CL0306	HeH	45	15	1.55085	Q8IX12	CCAR1	Cell division cycle and apoptosis regulator protein 1, Cell cycle and apoptosis regulatory protein 1, CARP-1, Death inducer with SAP domain	-2.03837	-2.54188	-0.614735	0.242809	0.1-1.0%		CL0020	TPR	29	70	1.51602	Q9NSV4	DIAPH3	Protein diaphanous homolog 3, Diaphanous-related formin-3, DRF3, MDia2	-3.05094	-2.83375	0.176857	1.50265	1.0-10.0%
CL0306	HeH	45	15	1.55085	P09874	PARP1	Poly [ADP-ribose] polymerase, 2.4.2.30	-1.07903	-1.78142	-0.689837	0.20425	0.1-1.0%		CL0020	TPR	29	70	1.51602	Q92552	MRPS27	28S ribosomal protein S27, mitochondrial, MRP-S27, S27mt, Mitochondrial ribosomal protein S27, Mitochondrial small ribosomal subunit protein mS27	-1.17639	-1.03844	0.161252	1.44961	1.0-10.0%
CL0306	HeH	45	15	1.55085	Q9UKV3	ACIN1	Apoptotic chromatin condensation inducer in the nucleus, Acinus	-1.99625	-2.91946	-1.02097	0.0952869	0.01-0.1%		CL0020	TPR	29	70	1.51602	O75153	CLUH	Clustered mitochondria protein homolog	-1.37103	-1.45821	-0.0178538	0.959724	0.1-1.0%
CL0306	HeH	45	15	1.55085	Q9ULT8	HECTD1	E3 ubiquitin-protein ligase HECTD1, 2.3.2.26, E3 ligase for inhibin receptor, EULIR, HECT domain-containing protein 1	-2.35756	-3.4021	-1.14264	0.0720039	0.01-0.1%		CL0020	TPR	29	70	1.51602	Q8IWX8	CHERP	Calcium homeostasis endoplasmic reticulum protein, ERPROT 213-21, SR-related CTD-associated factor 6	-1.72038	-1.80736	-0.0180408	0.959311	0.1-1.0%
CL0306	HeH	45	15	1.55085	P82979	SARNP	SAP domain-containing ribonucleoprotein, Cytokine-induced protein of 29 kDa, Nuclear protein Hcc-1, Proliferation-associated cytokine-inducible protein CIP29	-1.38886	-2.67352	-1.16699	0.0680787	0.01-0.1%		CL0020	TPR	29	70	1.51602	Q9BZZ5	API5	Apoptosis inhibitor 5, API-5, Antiapoptosis clone 11 protein, AAC-11, Cell migration-inducing gene 8 protein, Fibroblast growth factor 2-interacting factor, FIF, Protein XAGL	-2.10477	-2.20725	-0.058398	0.874182	0.1-1.0%
CL0306	HeH	45	15	1.55085	P42166	TMPO	Lamina-associated polypeptide 2, isoform alpha, Thymopoietin isoform alpha, TP alpha, Thymopoietin-related peptide isoform alpha, TPRP isoform alpha	-1.43026	-2.76375	-1.24743	0.0565679	0.01-0.1%		CL0020	TPR	29	70	1.51602	P78344	EIF4G2	Eukaryotic translation initiation factor 4 gamma 2, eIF-4-gamma 2, eIF-4G 2, eIF4G 2, Death-associated protein 5, DAP-5, p97	-1.45761	-1.76137	-0.224351	0.596553	0.1-1.0%
CL0020	TPR	46	70	1.51602	Q8TB72	PUM2	Pumilio homolog 2, Pumilio-2	-2.85743	-1.54877	1.38446	24.236	>10.0%		CL0020	TPR	29	70	1.51602	Q04637	EIF4G1	Eukaryotic translation initiation factor 4 gamma 1, eIF-4-gamma 1, eIF-4G 1, eIF-4G1, p220	-1.10873	-1.37886	-0.250905	0.561171	0.1-1.0%
CL0020	TPR	46	70	1.51602	Q14671	PUM1	Pumilio homolog 1, HsPUM, Pumilio-1	-2.07298	-0.847998	1.30391	20.1331	>10.0%		CL0020	TPR	29	70	1.51602	Q5VT52	RPRD2	Regulation of nuclear pre-mRNA domain-containing protein 2	-2.73572	-3.11047	-0.268667	0.538683	0.1-1.0%
CL0020	TPR	46	70	1.51602	Q9UGR2	ZC3H7B	Zinc finger CCCH domain-containing protein 7B, Rotavirus 'X'-associated non-structural protein, RoXaN	-2.40192	-1.6201	0.878415	7.55814	1.0-10.0%		CL0020	TPR	29	70	1.51602	O15042	U2SURP	U2 snRNP-associated SURP motif-containing protein, 140 kDa Ser/Arg-rich domain protein, U2-associated protein SR140	-0.935893	-1.28095	-0.279366	0.525574	0.1-1.0%
CL0020	TPR	46	70	1.51602	P42704	LRPPRC	Leucine-rich PPR motif-containing protein, mitochondrial, 130 kDa leucine-rich protein, LRP 130, GP130	-0.794665	-0.0291755	0.821831	6.63485	1.0-10.0%		CL0020	TPR	29	70	1.51602	Q9HAU5	UPF2	Regulator of nonsense transcripts 2, Up-frameshift suppressor 2 homolog, hUpf2	-2.44249	-2.75553	-0.290991	0.511693	0.1-1.0%
CL0020	TPR	46	70	1.51602	Q14690	PDCD11	Protein RRP5 homolog, NF-kappa-B-binding protein, NFBP, Programmed cell death protein 11	-1.43027	-0.861512	0.651272	4.47994	1.0-10.0%		CL0020	TPR	29	70	1.51602	Q9HAV4	XPO5	Exportin-5, Exp5, Ran-binding protein 21	-1.82284	-2.14802	-0.29337	0.508897	0.1-1.0%
CL0020	TPR	46	70	1.51602	O75127	PTCD1	Pentatricopeptide repeat-containing protein 1, mitochondrial	-3.27862	-2.62321	0.629345	4.25937	1.0-10.0%		CL0020	TPR	29	70	1.51602	Q9BXJ9	NAA15	N-alpha-acetyltransferase 15, NatA auxiliary subunit, Gastric cancer antigen Ga19, N-terminal acetyltransferase, NMDA receptor-regulated protein 1, Protein tubedown-1, Tbdn100	-1.55621	-1.95314	-0.353395	0.443206	0.1-1.0%
CL0020	TPR	46	70	1.51602	O60306	AQR	RNA helicase aquarius, 3.6.4.13, Intron-binding protein of 160 kDa, IBP160	-2.10288	-1.59878	0.579076	3.79381	1.0-10.0%		CL0020	TPR	29	70	1.51602	A5YKK6	CNOT1	CCR4-NOT transcription complex subunit 1, CCR4-associated factor 1, Negative regulator of transcription subunit 1 homolog, NOT1H, hNOT1	-2.22873	-2.6714	-0.450139	0.3547	0.1-1.0%
CL0020	TPR	46	70	1.51602	Q96EY7	PTCD3	Pentatricopeptide repeat domain-containing protein 3, mitochondrial, 28S ribosomal protein S39, mitochondrial, MRP-S39, Mitochondrial small ribosomal subunit protein mS39, Transformation-related gene 15 protein, TRG-15	-1.6172	-1.14748	0.554711	3.58683	1.0-10.0%		CL0020	TPR	29	70	1.51602	Q53EL6	PDCD4	Programmed cell death protein 4, Neoplastic transformation inhibitor protein, Nuclear antigen H731-like, Protein 197/15a	-2.13385	-2.69243	-0.475607	0.334498	0.1-1.0%
CL0020	TPR	46	70	1.51602	Q86TB9	PATL1	Protein PAT1 homolog 1, PAT1-like protein 1, Protein PAT1 homolog b, Pat1b, hPat1b	-2.89647	-2.48849	0.539958	3.46703	1.0-10.0%		CL0020	TPR	29	70	1.51602	Q9BZJ0	CRNKL1	Crooked neck-like protein 1, Crooked neck homolog, hCrn	-2.95991	-3.52031	-0.483874	0.328191	0.1-1.0%
CL0020	TPR	46	70	1.51602	Q15397	PUM3	Pumilio homolog 3, HBV X-transactivated gene 5 protein, HBV XAg-transactivated protein 5, Minor histocompatibility antigen HA-8, HLA-HA8	-1.89073	-1.5803	0.381106	2.40495	1.0-10.0%		CL0020	TPR	29	70	1.51602	Q9HCG8	CWC22	Pre-mRNA-splicing factor CWC22 homolog, Nucampholin homolog, fSAPb	-3.45967	-3.62387	-0.489145	0.324231	0.1-1.0%
CL0020	TPR	46	70	1.51602	O94913	PCF11	Pre-mRNA cleavage complex 2 protein Pcf11, Pre-mRNA cleavage complex II protein Pcf11	-3.64426	-3.32966	0.378737	2.39187	1.0-10.0%		CL0020	TPR	29	70	1.51602	P53621	COPA	Coatomer subunit alpha, Alpha-coat protein, Alpha-COP, HEP-COP, HEPCOP	-1.16622	-1.1529	-0.522823	0.300038	0.1-1.0%
CL0020	TPR	46	70	1.51602	Q99613	EIF3C	Eukaryotic translation initiation factor 3 subunit C, eIF3c, Eukaryotic translation initiation factor 3 subunit 8, eIF3 p110	-1.1506	-0.895396	0.298136	1.98671	1.0-10.0%		CL0020	TPR	29	70	1.51602	O60716	CTNND1	Catenin delta-1, Cadherin-associated Src substrate, CAS, p120 catenin, p120(ctn), p120(cas)	-2.14742	-2.68161	-0.573121	0.267226	0.1-1.0%
CL0020	TPR	46	70	1.51602	O43432	EIF4G3	Eukaryotic translation initiation factor 4 gamma 3, eIF-4-gamma 3, eIF-4G 3, eIF4G 3, eIF-4-gamma II, eIF4GII	-3.90936	-3.7983	0.284441	1.92504	1.0-10.0%		CL0020	TPR	29	70	1.51602	Q6KC79	NIPBL	Nipped-B-like protein, Delangin, SCC2 homolog	-2.65199	-3.04043	-0.622214	0.238664	0.1-1.0%
CL0020	TPR	46	70	1.51602	Q5C9Z4	NOM1	Nucleolar MIF4G domain-containing protein 1, SGD1 homolog	-3.034	-2.66042	0.241298	1.743	1.0-10.0%		CL0020	TPR	29	70	1.51602	Q92973	TNPO1	Transportin-1, Importin beta-2, Karyopherin beta-2, M9 region interaction protein, MIP	-1.40127	-2.02875	-0.636794	0.230784	0.1-1.0%
CL0020	TPR	46	70	1.51602	O76094	SRP72	Signal recognition particle subunit SRP72, SRP72, Signal recognition particle 72 kDa protein	-2.20039	-2.00482	0.238779	1.73292	1.0-10.0%		CL0020	TPR	29	70	1.51602	P78527	PRKDC	DNA-dependent protein kinase catalytic subunit, DNA-PK catalytic subunit, DNA-PKcs, 2.7.11.1, DNPK1, p460	-0.263688	-0.826513	-0.648696	0.224545	0.1-1.0%
CL0020	TPR	46	70	1.51602	Q9BQ70	TCF25	Transcription factor 25, TCF-25, Nuclear localized protein 1	-3.07424	-2.92616	0.200826	1.58791	1.0-10.0%		CL0020	TPR	29	70	1.51602	O60566	BUB1B	Mitotic checkpoint serine/threonine-protein kinase BUB1 beta, 2.7.11.1, MAD3/BUB1-related protein kinase, hBUBR1, Mitotic checkpoint kinase MAD3L, Protein SSK1	-2.98649	-3.61066	-0.670359	0.213619	0.1-1.0%
CL0020	TPR	46	70	1.51602	Q9NSV4	DIAPH3	Protein diaphanous homolog 3, Diaphanous-related formin-3, DRF3, MDia2	-3.05094	-2.83375	0.176857	1.50265	1.0-10.0%		CL0020	TPR	29	70	1.51602	Q7L1Q6	BZW1	eIF5-mimic protein 2, Basic leucine zipper and W2 domain-containing protein 1, Protein Orf	-1.22815	-1.94831	-0.697992	0.200451	0.1-1.0%
CL0020	TPR	46	70	1.51602	Q92552	MRPS27	28S ribosomal protein S27, mitochondrial, MRP-S27, S27mt, Mitochondrial ribosomal protein S27, Mitochondrial small ribosomal subunit protein mS27	-1.17639	-1.03844	0.161252	1.44961	1.0-10.0%		CL0020	TPR	29	70	1.51602	Q14008	CKAP5	Cytoskeleton-associated protein 5, Colonic and hepatic tumor overexpressed gene protein, Ch-TOG	-2.04338	-2.69547	-0.706463	0.196579	0.1-1.0%
CL0020	TPR	46	70	1.51602	O75153	CLUH	Clustered mitochondria protein homolog	-1.37103	-1.45821	-0.0178538	0.959724	0.1-1.0%		CL0020	TPR	29	70	1.51602	P55010	EIF5	Eukaryotic translation initiation factor 5, eIF-5	-1.79518	-2.62304	-0.737703	0.182935	0.1-1.0%
CL0020	TPR	46	70	1.51602	Q8IWX8	CHERP	Calcium homeostasis endoplasmic reticulum protein, ERPROT 213-21, SR-related CTD-associated factor 6	-1.72038	-1.80736	-0.0180408	0.959311	0.1-1.0%		CL0020	TPR	29	70	1.51602	O00410	IPO5	Importin-5, Imp5, Importin subunit beta-3, Karyopherin beta-3, Ran-binding protein 5, RanBP5	-1.11649	-1.54295	-0.751988	0.177016	0.1-1.0%
CL0020	TPR	46	70	1.51602	Q9BZZ5	API5	Apoptosis inhibitor 5, API-5, Antiapoptosis clone 11 protein, AAC-11, Cell migration-inducing gene 8 protein, Fibroblast growth factor 2-interacting factor, FIF, Protein XAGL	-2.10477	-2.20725	-0.058398	0.874182	0.1-1.0%		CL0020	TPR	29	70	1.51602	Q9H3S7	PTPN23	Tyrosine-protein phosphatase non-receptor type 23, 3.1.3.48, His domain-containing protein tyrosine phosphatase, HD-PTP, Protein tyrosine phosphatase TD14, PTP-TD14	-3.34325	-4.1465	-0.930177	0.117442	0.1-1.0%
CL0020	TPR	46	70	1.51602	P78344	EIF4G2	Eukaryotic translation initiation factor 4 gamma 2, eIF-4-gamma 2, eIF-4G 2, eIF4G 2, Death-associated protein 5, DAP-5, p97	-1.45761	-1.76137	-0.224351	0.596553	0.1-1.0%		CL0020	TPR	29	70	1.51602	Q02790	FKBP4	Peptidyl-prolyl cis-trans isomerase FKBP4, PPIase FKBP4, 5.2.1.8, 51 kDa FK506-binding protein, FKBP51, 52 kDa FK506-binding protein, 52 kDa FKBP, FKBP-52, 59 kDa immunophilin, p59, FK506-binding protein 4, FKBP-4, FKBP59, HSP-binding immunophilin, HBI, Immunophilin FKBP52, Rotamase	-0.901649	-1.75279	-0.97936	0.104867	0.1-1.0%
CL0020	TPR	46	70	1.51602	Q04637	EIF4G1	Eukaryotic translation initiation factor 4 gamma 1, eIF-4-gamma 1, eIF-4G 1, eIF-4G1, p220	-1.10873	-1.37886	-0.250905	0.561171	0.1-1.0%		CL0020	TPR	29	70	1.51602	O95373	IPO7	Importin-7, Imp7, Ran-binding protein 7, RanBP7	-1.13632	-1.98606	-1.00736	0.0983192	0.01-0.1%
CL0020	TPR	46	70	1.51602	Q5VT52	RPRD2	Regulation of nuclear pre-mRNA domain-containing protein 2	-2.73572	-3.11047	-0.268667	0.538683	0.1-1.0%		CL0020	TPR	29	70	1.51602	P52292	KPNA2	Importin subunit alpha-1, Karyopherin subunit alpha-2, RAG cohort protein 1, SRP1-alpha	-1.15859	-2.1167	-1.05659	0.0877823	0.01-0.1%
CL0020	TPR	46	70	1.51602	O15042	U2SURP	U2 snRNP-associated SURP motif-containing protein, 140 kDa Ser/Arg-rich domain protein, U2-associated protein SR140	-0.935893	-1.28095	-0.279366	0.525574	0.1-1.0%		CL0020	TPR	29	70	1.51602	O94906	PRPF6	Pre-mRNA-processing factor 6, Androgen receptor N-terminal domain-transactivating protein 1, ANT-1, PRP6 homolog, U5 snRNP-associated 102 kDa protein, U5-102 kDa protein	-1.773	-2.69229	-1.06037	0.0870229	0.01-0.1%
CL0020	TPR	46	70	1.51602	Q9HAU5	UPF2	Regulator of nonsense transcripts 2, Up-frameshift suppressor 2 homolog, hUpf2	-2.44249	-2.75553	-0.290991	0.511693	0.1-1.0%		CL0020	TPR	29	70	1.51602	O00203	AP3B1	Adaptor-related protein complex 3 beta 1 subunit isoform 1	-1.7887	-2.46107	-1.06038	0.0870197	0.01-0.1%
CL0020	TPR	46	70	1.51602	Q9HAV4	XPO5	Exportin-5, Exp5, Ran-binding protein 21	-1.82284	-2.14802	-0.29337	0.508897	0.1-1.0%		CL0020	TPR	29	70	1.51602	Q9HCS7	XAB2	Pre-mRNA-splicing factor SYF1, Protein HCNP, XPA-binding protein 2	-2.01196	-3.08486	-1.0823	0.0827366	0.01-0.1%
CL0020	TPR	46	70	1.51602	Q9BXJ9	NAA15	N-alpha-acetyltransferase 15, NatA auxiliary subunit, Gastric cancer antigen Ga19, N-terminal acetyltransferase, NMDA receptor-regulated protein 1, Protein tubedown-1, Tbdn100	-1.55621	-1.95314	-0.353395	0.443206	0.1-1.0%		CL0020	TPR	29	70	1.51602	Q09161	NCBP1	Nuclear cap-binding protein subunit 1, 80 kDa nuclear cap-binding protein, CBP80, NCBP 80 kDa subunit	-1.93447	-3.09383	-1.20579	0.0622596	0.01-0.1%
CL0020	TPR	46	70	1.51602	A5YKK6	CNOT1	CCR4-NOT transcription complex subunit 1, CCR4-associated factor 1, Negative regulator of transcription subunit 1 homolog, NOT1H, hNOT1	-2.22873	-2.6714	-0.450139	0.3547	0.1-1.0%		CL0020	TPR	29	70	1.51602	Q9NTI5	PDS5B	Sister chromatid cohesion protein PDS5 homolog B, Androgen-induced proliferation inhibitor, Androgen-induced prostate proliferative shutoff-associated protein AS3	-2.50822	-3.45585	-1.22283	0.0598641	0.01-0.1%
CL0020	TPR	46	70	1.51602	Q53EL6	PDCD4	Programmed cell death protein 4, Neoplastic transformation inhibitor protein, Nuclear antigen H731-like, Protein 197/15a	-2.13385	-2.69243	-0.475607	0.334498	0.1-1.0%		CL0020	TPR	29	70	1.51602	Q9Y262	EIF3L	Eukaryotic translation initiation factor 3 subunit L, eIF3l, Eukaryotic translation initiation factor 3 subunit 6-interacting protein, Eukaryotic translation initiation factor 3 subunit E-interacting protein	-1.2654	-2.52874	-1.28903	0.0514009	0.01-0.1%
CL0020	TPR	46	70	1.51602	Q9BZJ0	CRNKL1	Crooked neck-like protein 1, Crooked neck homolog, hCrn	-2.95991	-3.52031	-0.483874	0.328191	0.1-1.0%		CL0020	TPR	29	70	1.51602	Q5VYK3	ECPAS	Proteasome adapter and scaffold protein ECM29, Ecm29 proteasome adapter and scaffold, Proteasome-associated protein ECM29 homolog	-1.56443	-2.69903	-1.2932	0.0509099	0.01-0.1%
CL0020	TPR	46	70	1.51602	Q9HCG8	CWC22	Pre-mRNA-splicing factor CWC22 homolog, Nucampholin homolog, fSAPb	-3.45967	-3.62387	-0.489145	0.324231	0.1-1.0%		CL0020	TPR	29	70	1.51602	O60610	DIAPH1	Protein diaphanous homolog 1, Diaphanous-related formin-1, DRF1	-1.88315	-2.92809	-1.31503	0.0484142	0.01-0.1%
CL0020	TPR	46	70	1.51602	P53621	COPA	Coatomer subunit alpha, Alpha-coat protein, Alpha-COP, HEP-COP, HEPCOP	-1.16622	-1.1529	-0.522823	0.300038	0.1-1.0%		CL0020	TPR	29	70	1.51602	O00231	PSMD11	26S proteasome non-ATPase regulatory subunit 11, 26S proteasome regulatory subunit RPN6, 26S proteasome regulatory subunit S9, 26S proteasome regulatory subunit p44.5	-1.40313	-2.51809	-1.45771	0.034857	0.01-0.1%
CL0020	TPR	46	70	1.51602	O60716	CTNND1	Catenin delta-1, Cadherin-associated Src substrate, CAS, p120 catenin, p120(ctn), p120(cas)	-2.14742	-2.68161	-0.573121	0.267226	0.1-1.0%		CL0020	TPR	29	70	1.51602	Q15021	NCAPD2	Condensin complex subunit 1, Chromosome condensation-related SMC-associated protein 1, Chromosome-associated protein D2, hCAP-D2, Non-SMC condensin I complex subunit D2, XCAP-D2 homolog	-1.68088	-2.91458	-1.46135	0.0345658	0.01-0.1%
CL0020	TPR	46	70	1.51602	Q6KC79	NIPBL	Nipped-B-like protein, Delangin, SCC2 homolog	-2.65199	-3.04043	-0.622214	0.238664	0.1-1.0%		CL0020	TPR	29	70	1.51602	Q13200	PSMD2	26S proteasome non-ATPase regulatory subunit 2, 26S proteasome regulatory subunit RPN1, 26S proteasome regulatory subunit S2, 26S proteasome subunit p97, Protein 55.11, Tumor necrosis factor type 1 receptor-associated protein 2	-1.34163	-2.80104	-1.52436	0.029898	0.01-0.1%
CL0020	TPR	46	70	1.51602	Q92973	TNPO1	Transportin-1, Importin beta-2, Karyopherin beta-2, M9 region interaction protein, MIP	-1.40127	-2.02875	-0.636794	0.230784	0.1-1.0%		CL0020	TPR	29	70	1.51602	Q9H3U1	UNC45A	Protein unc-45 homolog A, Unc-45A, GCUNC-45, Smooth muscle cell-associated protein 1, SMAP-1	-2.16058	-3.36482	-1.5311	0.0294373	0.01-0.1%
CL0020	TPR	46	70	1.51602	P78527	PRKDC	DNA-dependent protein kinase catalytic subunit, DNA-PK catalytic subunit, DNA-PKcs, 2.7.11.1, DNPK1, p460	-0.263688	-0.826513	-0.648696	0.224545	0.1-1.0%		CL0020	TPR	29	70	1.51602	P53618	COPB1	Coatomer subunit beta, Beta-coat protein, Beta-COP	-1.67313	-2.88583	-1.77824	0.0166633	0.01-0.1%
CL0020	TPR	46	70	1.51602	O60566	BUB1B	Mitotic checkpoint serine/threonine-protein kinase BUB1 beta, 2.7.11.1, MAD3/BUB1-related protein kinase, hBUBR1, Mitotic checkpoint kinase MAD3L, Protein SSK1	-2.98649	-3.61066	-0.670359	0.213619	0.1-1.0%		CL0020	TPR	29	70	1.51602	Q14974	KPNB1	Importin subunit beta-1, Importin-90, Karyopherin subunit beta-1, Nuclear factor p97, Pore targeting complex 97 kDa subunit, PTAC97	-1.20432	-2.65222	-1.80521	0.0156601	0.01-0.1%
CL0020	TPR	46	70	1.51602	Q7L1Q6	BZW1	eIF5-mimic protein 2, Basic leucine zipper and W2 domain-containing protein 1, Protein Orf	-1.22815	-1.94831	-0.697992	0.200451	0.1-1.0%		CL0020	TPR	29	70	1.51602	Q00610	CLTC	Clathrin heavy chain 1, Clathrin heavy chain on chromosome 17, CLH-17	-0.655745	-2.11971	-1.81502	0.0153101	0.01-0.1%
CL0020	TPR	46	70	1.51602	Q14008	CKAP5	Cytoskeleton-associated protein 5, Colonic and hepatic tumor overexpressed gene protein, Ch-TOG	-2.04338	-2.69547	-0.706463	0.196579	0.1-1.0%		CL0020	TPR	29	70	1.51602	Q9BPX3	NCAPG	Condensin complex subunit 3, Chromosome-associated protein G, Condensin subunit CAP-G, hCAP-G, Melanoma antigen NY-MEL-3, Non-SMC condensin I complex subunit G, XCAP-G homolog	-1.89048	-3.50143	-1.81943	0.0151555	0.01-0.1%
CL0020	TPR	46	70	1.51602	P55010	EIF5	Eukaryotic translation initiation factor 5, eIF-5	-1.79518	-2.62304	-0.737703	0.182935	0.1-1.0%		CL0020	TPR	29	70	1.51602	Q8WUM4	PDCD6IP	Programmed cell death 6-interacting protein, PDCD6-interacting protein, ALG-2-interacting protein 1, ALG-2-interacting protein X, Hp95	-1.43147	-3.15626	-1.944	0.0113762	0.01-0.1%
CL0020	TPR	46	70	1.51602	O00410	IPO5	Importin-5, Imp5, Importin subunit beta-3, Karyopherin beta-3, Ran-binding protein 5, RanBP5	-1.11649	-1.54295	-0.751988	0.177016	0.1-1.0%		CL0020	TPR	29	70	1.51602	Q13619	CUL4A	Cullin-4A, CUL-4A	-1.57695	-3.3012	-1.98072	0.0104539	0.01-0.1%
CL0020	TPR	46	70	1.51602	Q9H3S7	PTPN23	Tyrosine-protein phosphatase non-receptor type 23, 3.1.3.48, His domain-containing protein tyrosine phosphatase, HD-PTP, Protein tyrosine phosphatase TD14, PTP-TD14	-3.34325	-4.1465	-0.930177	0.117442	0.1-1.0%		CL0020	TPR	29	70	1.51602	Q8N3U4	STAG2	Cohesin subunit SA-2, SCC3 homolog 2, Stromal antigen 2	-2.11384	-4.07702	-1.98966	0.010241	0.01-0.1%
CL0020	TPR	46	70	1.51602	Q02790	FKBP4	Peptidyl-prolyl cis-trans isomerase FKBP4, PPIase FKBP4, 5.2.1.8, 51 kDa FK506-binding protein, FKBP51, 52 kDa FK506-binding protein, 52 kDa FKBP, FKBP-52, 59 kDa immunophilin, p59, FK506-binding protein 4, FKBP-4, FKBP59, HSP-binding immunophilin, HBI, Immunophilin FKBP52, Rotamase	-0.901649	-1.75279	-0.97936	0.104867	0.1-1.0%		CL0020	TPR	29	70	1.51602	P55060	CSE1L	Exportin-2, Exp2, Cellular apoptosis susceptibility protein, Chromosome segregation 1-like protein, Importin-alpha re-exporter	-1.16569	-2.85179	-1.99969	0.0100072	0.01-0.1%
CL0020	TPR	46	70	1.51602	O95373	IPO7	Importin-7, Imp7, Ran-binding protein 7, RanBP7	-1.13632	-1.98606	-1.00736	0.0983192	0.01-0.1%		CL0020	TPR	29	70	1.51602	O14980	XPO1	Exportin-1, Exp1, Chromosome region maintenance 1 protein homolog	-1.34918	-3.15283	-2.02439	0.00945381	<0.01%
CL0020	TPR	46	70	1.51602	P52292	KPNA2	Importin subunit alpha-1, Karyopherin subunit alpha-2, RAG cohort protein 1, SRP1-alpha	-1.15859	-2.1167	-1.05659	0.0877823	0.01-0.1%		CL0020	TPR	29	70	1.51602	Q9Y678	COPG1	Coatomer subunit gamma-1, Gamma-1-coat protein, Gamma-1-COP	-1.60097	-3.24859	-2.10184	0.00790968	<0.01%
CL0020	TPR	46	70	1.51602	O94906	PRPF6	Pre-mRNA-processing factor 6, Androgen receptor N-terminal domain-transactivating protein 1, ANT-1, PRP6 homolog, U5 snRNP-associated 102 kDa protein, U5-102 kDa protein	-1.773	-2.69229	-1.06037	0.0870229	0.01-0.1%		CL0020	TPR	29	70	1.51602	Q86VP6	CAND1	Cullin-associated NEDD8-dissociated protein 1, Cullin-associated and neddylation-dissociated protein 1, TBP-interacting protein of 120 kDa A, TBP-interacting protein 120A, p120 CAND1	-1.17085	-2.8646	-2.30288	0.00497879	<0.01%
CL0020	TPR	46	70	1.51602	O00203	AP3B1	Adaptor-related protein complex 3 beta 1 subunit isoform 1	-1.7887	-2.46107	-1.06038	0.0870197	0.01-0.1%		CL0020	TPR	29	70	1.51602	O60763	USO1	General vesicular transport factor p115, Protein USO1 homolog, Transcytosis-associated protein, TAP, Vesicle-docking protein	-1.96573	-4.17183	-2.86602	0.00136137	<0.01%
CL0020	TPR	46	70	1.51602	Q9HCS7	XAB2	Pre-mRNA-splicing factor SYF1, Protein HCNP, XPA-binding protein 2	-2.01196	-3.08486	-1.0823	0.0827366	0.01-0.1%		CL0229	RING	30	13	1.45702	Q92900	UPF1	Regulator of nonsense transcripts 1, 3.6.4.12, 3.6.4.13, ATP-dependent helicase RENT1, Nonsense mRNA reducing factor 1, NORF1, Up-frameshift suppressor 1 homolog, hUpf1	-1.39672	-0.861517	0.62185	4.18649	1.0-10.0%
CL0020	TPR	46	70	1.51602	Q09161	NCBP1	Nuclear cap-binding protein subunit 1, 80 kDa nuclear cap-binding protein, CBP80, NCBP 80 kDa subunit	-1.93447	-3.09383	-1.20579	0.0622596	0.01-0.1%		CL0229	RING	30	13	1.45702	Q9BRZ2	TRIM56	E3 ubiquitin-protein ligase TRIM56, 2.3.2.27, RING finger protein 109, Tripartite motif-containing protein 56	-3.76598	-3.30735	0.6032	4.01051	1.0-10.0%
CL0020	TPR	46	70	1.51602	Q9NTI5	PDS5B	Sister chromatid cohesion protein PDS5 homolog B, Androgen-induced proliferation inhibitor, Androgen-induced prostate proliferative shutoff-associated protein AS3	-2.50822	-3.45585	-1.22283	0.0598641	0.01-0.1%		CL0229	RING	30	13	1.45702	Q9H000	MKRN2	E3 ubiquitin-protein ligase makorin-2, 2.3.2.27, RING finger protein 62, RING-type E3 ubiquitin transferase makorin-2	-3.2836	-2.89546	0.501817	3.17554	1.0-10.0%
CL0020	TPR	46	70	1.51602	Q9Y262	EIF3L	Eukaryotic translation initiation factor 3 subunit L, eIF3l, Eukaryotic translation initiation factor 3 subunit 6-interacting protein, Eukaryotic translation initiation factor 3 subunit E-interacting protein	-1.2654	-2.52874	-1.28903	0.0514009	0.01-0.1%		CL0229	RING	30	13	1.45702	Q5TC82	RC3H1	Roquin-1, Roquin, 2.3.2.27, RING finger and C3H zinc finger protein 1, RING finger and CCCH-type zinc finger domain-containing protein 1, RING finger protein 198	-2.87008	-2.52151	0.366916	2.32764	1.0-10.0%
CL0020	TPR	46	70	1.51602	Q5VYK3	ECPAS	Proteasome adapter and scaffold protein ECM29, Ecm29 proteasome adapter and scaffold, Proteasome-associated protein ECM29 homolog	-1.56443	-2.69903	-1.2932	0.0509099	0.01-0.1%		CL0229	RING	30	13	1.45702	Q14258	TRIM25	E3 ubiquitin/ISG15 ligase TRIM25, 6.3.2.n3, Estrogen-responsive finger protein, RING finger protein 147, RING-type E3 ubiquitin transferase, 2.3.2.27, RING-type E3 ubiquitin transferase TRIM25, Tripartite motif-containing protein 25, Ubiquitin/ISG15-conjugating enzyme TRIM25, Zinc finger protein 147	-1.71663	-1.51036	0.242975	1.74975	1.0-10.0%
CL0020	TPR	46	70	1.51602	O60610	DIAPH1	Protein diaphanous homolog 1, Diaphanous-related formin-1, DRF1	-1.88315	-2.92809	-1.31503	0.0484142	0.01-0.1%		CL0229	RING	30	13	1.45702	Q7Z6E9	RBBP6	E3 ubiquitin-protein ligase RBBP6, 2.3.2.27, Proliferation potential-related protein, Protein P2P-R, RING-type E3 ubiquitin transferase RBBP6, Retinoblastoma-binding Q protein 1, RBQ-1, Retinoblastoma-binding protein 6, p53-associated cellular protein of testis	-2.51264	-2.51925	0.0618295	1.153	1.0-10.0%
CL0020	TPR	46	70	1.51602	O00231	PSMD11	26S proteasome non-ATPase regulatory subunit 11, 26S proteasome regulatory subunit RPN6, 26S proteasome regulatory subunit S9, 26S proteasome regulatory subunit p44.5	-1.40313	-2.51809	-1.45771	0.034857	0.01-0.1%		CL0229	RING	30	13	1.45702	Q9H8Y5	ANKZF1	Ankyrin repeat and zinc finger domain-containing protein 1, Zinc finger protein 744	-3.09188	-3.20658	-0.0223608	0.949815	0.1-1.0%
CL0020	TPR	46	70	1.51602	Q15021	NCAPD2	Condensin complex subunit 1, Chromosome condensation-related SMC-associated protein 1, Chromosome-associated protein D2, hCAP-D2, Non-SMC condensin I complex subunit D2, XCAP-D2 homolog	-1.68088	-2.91458	-1.46135	0.0345658	0.01-0.1%		CL0229	RING	30	13	1.45702	Q8TDB6	DTX3L	E3 ubiquitin-protein ligase DTX3L, 2.3.2.27, B-lymphoma- and BAL-associated protein, Protein deltex-3-like, RING-type E3 ubiquitin transferase DTX3L, Rhysin-2, Rhysin2	-3.75239	-4.28311	-0.420151	0.380057	0.1-1.0%
CL0020	TPR	46	70	1.51602	Q13200	PSMD2	26S proteasome non-ATPase regulatory subunit 2, 26S proteasome regulatory subunit RPN1, 26S proteasome regulatory subunit S2, 26S proteasome subunit p97, Protein 55.11, Tumor necrosis factor type 1 receptor-associated protein 2	-1.34163	-2.80104	-1.52436	0.029898	0.01-0.1%		CL0229	RING	30	13	1.45702	Q12899	TRIM26	Tripartite motif-containing protein 26, 2.3.2.27, Acid finger protein, AFP, RING finger protein 95, Zinc finger protein 173	-3.18122	-3.70202	-0.449349	0.355346	0.1-1.0%
CL0020	TPR	46	70	1.51602	Q9H3U1	UNC45A	Protein unc-45 homolog A, Unc-45A, GCUNC-45, Smooth muscle cell-associated protein 1, SMAP-1	-2.16058	-3.36482	-1.5311	0.0294373	0.01-0.1%		CL0229	RING	30	13	1.45702	Q14527	HLTF	Helicase-like transcription factor, 2.3.2.27, 3.6.4.-, DNA-binding protein/plasminogen activator inhibitor 1 regulator, HIP116, RING finger protein 80, RING-type E3 ubiquitin transferase HLTF, SWI/SNF-related matrix-associated actin-dependent regulator of chromatin subfamily A member 3, Sucrose nonfermenting protein 2-like 3	-2.51918	-2.99681	-0.462707	0.344583	0.1-1.0%
CL0020	TPR	46	70	1.51602	P53618	COPB1	Coatomer subunit beta, Beta-coat protein, Beta-COP	-1.67313	-2.88583	-1.77824	0.0166633	0.01-0.1%		CL0229	RING	30	13	1.45702	Q63HN8	RNF213	E3 ubiquitin-protein ligase RNF213, 2.3.2.27, 3.6.4.-, ALK lymphoma oligomerization partner on chromosome 17, E3 ubiquitin-lipopolysaccharide ligase RNF213, 2.3.2.-, Mysterin, RING finger protein 213	-2.29503	-2.99497	-0.717072	0.191835	0.1-1.0%
CL0020	TPR	46	70	1.51602	Q14974	KPNB1	Importin subunit beta-1, Importin-90, Karyopherin subunit beta-1, Nuclear factor p97, Pore targeting complex 97 kDa subunit, PTAC97	-1.20432	-2.65222	-1.80521	0.0156601	0.01-0.1%		CL0229	RING	30	13	1.45702	O15344	MID1	E3 ubiquitin-protein ligase Midline-1, 2.3.2.27, Midin, Putative transcription factor XPRF, RING finger protein 59, RING finger protein Midline-1, RING-type E3 ubiquitin transferase Midline-1, Tripartite motif-containing protein 18	-3.1729	-4.22407	-1.20885	0.0618224	0.01-0.1%
CL0020	TPR	46	70	1.51602	Q00610	CLTC	Clathrin heavy chain 1, Clathrin heavy chain on chromosome 17, CLH-17	-0.655745	-2.11971	-1.81502	0.0153101	0.01-0.1%		CL0229	RING	30	13	1.45702	Q9Y314	NOSIP	Nitric oxide synthase-interacting protein, E3 ubiquitin-protein ligase NOSIP, 2.3.2.27, RING-type E3 ubiquitin transferase NOSIP, eNOS-interacting protein	-2.23307	-2.9242	-1.26009	0.054943	0.01-0.1%
CL0020	TPR	46	70	1.51602	Q9BPX3	NCAPG	Condensin complex subunit 3, Chromosome-associated protein G, Condensin subunit CAP-G, hCAP-G, Melanoma antigen NY-MEL-3, Non-SMC condensin I complex subunit G, XCAP-G homolog	-1.89048	-3.50143	-1.81943	0.0151555	0.01-0.1%		CL0280	PIN	31	6	1.41931	Q9Y324	FCF1	rRNA-processing protein FCF1 homolog	-2.85131	-2.40344	0.434794	2.72141	1.0-10.0%
CL0020	TPR	46	70	1.51602	Q8WUM4	PDCD6IP	Programmed cell death 6-interacting protein, PDCD6-interacting protein, ALG-2-interacting protein 1, ALG-2-interacting protein X, Hp95	-1.43147	-3.15626	-1.944	0.0113762	0.01-0.1%		CL0280	PIN	31	6	1.41931	Q9BRU9	UTP23	rRNA-processing protein UTP23 homolog	-3.1289	-3.01436	0.230014	1.6983	1.0-10.0%
CL0020	TPR	46	70	1.51602	Q13619	CUL4A	Cullin-4A, CUL-4A	-1.57695	-3.3012	-1.98072	0.0104539	0.01-0.1%		CL0280	PIN	31	6	1.41931	Q9ULX3	NOB1	RNA-binding protein NOB1, 3.1.-.-, Phosphorylation regulatory protein HP-10, Protein ART-4	-1.94881	-1.79705	0.222375	1.66869	1.0-10.0%
CL0020	TPR	46	70	1.51602	Q8N3U4	STAG2	Cohesin subunit SA-2, SCC3 homolog 2, Stromal antigen 2	-2.11384	-4.07702	-1.98966	0.010241	0.01-0.1%		CL0280	PIN	31	6	1.41931	Q9H0D6	XRN2	5'-3' exoribonuclease 2, 3.1.13.-, DHM1-like protein, DHP protein	-1.85569	-1.62457	0.116886	1.30884	1.0-10.0%
CL0020	TPR	46	70	1.51602	P55060	CSE1L	Exportin-2, Exp2, Cellular apoptosis susceptibility protein, Chromosome segregation 1-like protein, Importin-alpha re-exporter	-1.16569	-2.85179	-1.99969	0.0100072	0.01-0.1%		CL0280	PIN	31	6	1.41931	Q8IZH2	XRN1	5'-3' exoribonuclease 1, 3.1.13.-, Strand-exchange protein 1 homolog	-2.35869	-2.66869	-0.16951	0.676846	0.1-1.0%
CL0020	TPR	46	70	1.51602	O14980	XPO1	Exportin-1, Exp1, Chromosome region maintenance 1 protein homolog	-1.34918	-3.15283	-2.02439	0.00945381	<0.01%		CL0280	PIN	31	6	1.41931	O15091	PRORP	Mitochondrial ribonuclease P catalytic subunit, 3.1.26.5, Mitochondrial ribonuclease P protein 3, Mitochondrial RNase P protein 3, Protein only RNase P catalytic subunit	-3.75929	-4.10435	-0.354816	0.441757	0.1-1.0%
CL0020	TPR	46	70	1.51602	Q9Y678	COPG1	Coatomer subunit gamma-1, Gamma-1-coat protein, Gamma-1-COP	-1.60097	-3.24859	-2.10184	0.00790968	<0.01%		CL0003	SAM	32	3	1.34201	Q9NYL2	MAP3K20	Mitogen-activated protein kinase kinase kinase 20, 2.7.11.25, Human cervical cancer suppressor gene 4 protein, HCCS-4, Leucine zipper- and sterile alpha motif-containing kinase, MLK-like mitogen-activated protein triple kinase, Mitogen-activated protein kinase kinase kinase MLT, Mixed lineage kinase 7, Mixed lineage kinase-related kinase, MLK-related kinase, MRK, Sterile alpha motif- and leucine …	-2.98835	-2.50395	0.529237	3.38249	1.0-10.0%
CL0020	TPR	46	70	1.51602	Q86VP6	CAND1	Cullin-associated NEDD8-dissociated protein 1, Cullin-associated and neddylation-dissociated protein 1, TBP-interacting protein of 120 kDa A, TBP-interacting protein 120A, p120 CAND1	-1.17085	-2.8646	-2.30288	0.00497879	<0.01%		CL0003	SAM	32	3	1.34201	O15357	INPPL1	Phosphatidylinositol 3,4,5-trisphosphate 5-phosphatase 2, 3.1.3.86, Inositol polyphosphate phosphatase-like protein 1, INPPL-1, Protein 51C, SH2 domain-containing inositol 5'-phosphatase 2, SH2 domain-containing inositol phosphatase 2, SHIP-2	-2.69659	-2.83962	-0.249462	0.563039	0.1-1.0%
CL0020	TPR	46	70	1.51602	O60763	USO1	General vesicular transport factor p115, Protein USO1 homolog, Transcytosis-associated protein, TAP, Vesicle-docking protein	-1.96573	-4.17183	-2.86602	0.00136137	<0.01%		CL0003	SAM	32	3	1.34201	Q12800	TFCP2	Alpha-globin transcription factor CP2, SAA3 enhancer factor, Transcription factor LSF	-2.62486	-3.71635	-1.09421	0.0804985	0.01-0.1%
CL0033	POZ	47	1	1.46167	Q9P2D0	IBTK	Inhibitor of Bruton tyrosine kinase, IBtk	-3.0107	-2.90489	0.164848	1.46167	1.0-10.0%		CL0552	Hect	33	3	1.33806	Q9UII4	HERC5	E3 ISG15--protein ligase HERC5, 2.3.2.-, Cyclin-E-binding protein 1, HECT domain and RCC1-like domain-containing protein 5	-2.32102	-1.67668	0.594096	3.92732	1.0-10.0%
CL0229	RING	48	13	1.45702	Q92900	UPF1	Regulator of nonsense transcripts 1, 3.6.4.12, 3.6.4.13, ATP-dependent helicase RENT1, Nonsense mRNA reducing factor 1, NORF1, Up-frameshift suppressor 1 homolog, hUpf1	-1.39672	-0.861517	0.62185	4.18649	1.0-10.0%		CL0552	Hect	33	3	1.33806	Q9ULT8	HECTD1	E3 ubiquitin-protein ligase HECTD1, 2.3.2.26, E3 ligase for inhibin receptor, EULIR, HECT domain-containing protein 1	-2.35756	-3.4021	-1.14264	0.0720039	0.01-0.1%
CL0229	RING	48	13	1.45702	Q9BRZ2	TRIM56	E3 ubiquitin-protein ligase TRIM56, 2.3.2.27, RING finger protein 109, Tripartite motif-containing protein 56	-3.76598	-3.30735	0.6032	4.01051	1.0-10.0%		CL0552	Hect	33	3	1.33806	Q7Z6Z7	HUWE1	E3 ubiquitin-protein ligase HUWE1, 2.3.2.26, ARF-binding protein 1, ARF-BP1, HECT, UBA and WWE domain-containing protein 1, HECT-type E3 ubiquitin transferase HUWE1, Homologous to E6AP carboxyl terminus homologous protein 9, HectH9, Large structure of UREB1, LASU1, Mcl-1 ubiquitin ligase E3, Mule, Upstream regulatory element-binding protein 1, URE-B1, URE-binding protein 1	-1.72871	-2.8084	-1.82841	0.0148452	0.01-0.1%
CL0229	RING	48	13	1.45702	Q9H000	MKRN2	E3 ubiquitin-protein ligase makorin-2, 2.3.2.27, RING finger protein 62, RING-type E3 ubiquitin transferase makorin-2	-3.2836	-2.89546	0.501817	3.17554	1.0-10.0%		CL0023	P-loop_NTPase	34	130	1.33447	Q9NVN8	GNL3L	Guanine nucleotide-binding protein-like 3-like protein	-2.2485	-1.25422	1.07948	12.0083	>10.0%
CL0229	RING	48	13	1.45702	Q5TC82	RC3H1	Roquin-1, Roquin, 2.3.2.27, RING finger and C3H zinc finger protein 1, RING finger and CCCH-type zinc finger domain-containing protein 1, RING finger protein 198	-2.87008	-2.52151	0.366916	2.32764	1.0-10.0%		CL0023	P-loop_NTPase	34	130	1.33447	O43896	KIF1C	Kinesin-like protein KIF1C	-2.92997	-2.16607	0.968451	9.29931	1.0-10.0%
CL0229	RING	48	13	1.45702	Q14258	TRIM25	E3 ubiquitin/ISG15 ligase TRIM25, 6.3.2.n3, Estrogen-responsive finger protein, RING finger protein 147, RING-type E3 ubiquitin transferase, 2.3.2.27, RING-type E3 ubiquitin transferase TRIM25, Tripartite motif-containing protein 25, Ubiquitin/ISG15-conjugating enzyme TRIM25, Zinc finger protein 147	-1.71663	-1.51036	0.242975	1.74975	1.0-10.0%		CL0023	P-loop_NTPase	34	130	1.33447	Q9BYK8	HELZ2	Helicase with zinc finger domain 2, ATP-dependent helicase PRIC285, Helicase with zinc finger 2, transcriptional coactivator, PPAR-alpha-interacting complex protein 285, PPAR-gamma DNA-binding domain-interacting protein 1, PDIP1, PPAR-gamma DBD-interacting protein 1, Peroxisomal proliferator-activated receptor A-interacting complex 285 kDa protein, 3.6.4.-	-2.94434	-2.15146	0.931044	8.53186	1.0-10.0%
CL0229	RING	48	13	1.45702	Q7Z6E9	RBBP6	E3 ubiquitin-protein ligase RBBP6, 2.3.2.27, Proliferation potential-related protein, Protein P2P-R, RING-type E3 ubiquitin transferase RBBP6, Retinoblastoma-binding Q protein 1, RBQ-1, Retinoblastoma-binding protein 6, p53-associated cellular protein of testis	-2.51264	-2.51925	0.0618295	1.153	1.0-10.0%		CL0023	P-loop_NTPase	34	130	1.33447	Q9HCE1	MOV10	Helicase MOV-10, 3.6.4.13, Armitage homolog, Moloney leukemia virus 10 protein	-1.60165	-0.883474	0.818687	6.587	1.0-10.0%
CL0229	RING	48	13	1.45702	Q9H8Y5	ANKZF1	Ankyrin repeat and zinc finger domain-containing protein 1, Zinc finger protein 744	-3.09188	-3.20658	-0.0223608	0.949815	0.1-1.0%		CL0023	P-loop_NTPase	34	130	1.33447	Q9NY93	DDX56	Probable ATP-dependent RNA helicase DDX56, 3.6.4.13, ATP-dependent 61 kDa nucleolar RNA helicase, DEAD box protein 21, DEAD box protein 56	-2.13994	-1.44622	0.78978	6.16283	1.0-10.0%
CL0229	RING	48	13	1.45702	Q8TDB6	DTX3L	E3 ubiquitin-protein ligase DTX3L, 2.3.2.27, B-lymphoma- and BAL-associated protein, Protein deltex-3-like, RING-type E3 ubiquitin transferase DTX3L, Rhysin-2, Rhysin2	-3.75239	-4.28311	-0.420151	0.380057	0.1-1.0%		CL0023	P-loop_NTPase	34	130	1.33447	Q00839	HNRNPU	Heterogeneous nuclear ribonucleoprotein U, hnRNP U, GRIP120, Nuclear p120 ribonucleoprotein, Scaffold-attachment factor A, SAF-A, p120, pp120	-0.423801	0.248723	0.767511	5.85479	1.0-10.0%
CL0229	RING	48	13	1.45702	Q12899	TRIM26	Tripartite motif-containing protein 26, 2.3.2.27, Acid finger protein, AFP, RING finger protein 95, Zinc finger protein 173	-3.18122	-3.70202	-0.449349	0.355346	0.1-1.0%		CL0023	P-loop_NTPase	34	130	1.33447	Q9P2E3	ZNFX1	NFX1-type zinc finger-containing protein 1	-2.58621	-1.90055	0.693428	4.9366	1.0-10.0%
CL0229	RING	48	13	1.45702	Q14527	HLTF	Helicase-like transcription factor, 2.3.2.27, 3.6.4.-, DNA-binding protein/plasminogen activator inhibitor 1 regulator, HIP116, RING finger protein 80, RING-type E3 ubiquitin transferase HLTF, SWI/SNF-related matrix-associated actin-dependent regulator of chromatin subfamily A member 3, Sucrose nonfermenting protein 2-like 3	-2.51918	-2.99681	-0.462707	0.344583	0.1-1.0%		CL0023	P-loop_NTPase	34	130	1.33447	Q1KMD3	HNRNPUL2	Heterogeneous nuclear ribonucleoprotein U-like protein 2, Scaffold-attachment factor A2, SAF-A2	-1.9465	-1.33716	0.685736	4.84994	1.0-10.0%
CL0229	RING	48	13	1.45702	Q63HN8	RNF213	E3 ubiquitin-protein ligase RNF213, 2.3.2.27, 3.6.4.-, ALK lymphoma oligomerization partner on chromosome 17, E3 ubiquitin-lipopolysaccharide ligase RNF213, 2.3.2.-, Mysterin, RING finger protein 213	-2.29503	-2.99497	-0.717072	0.191835	0.1-1.0%		CL0023	P-loop_NTPase	34	130	1.33447	Q13823	GNL2	Nucleolar GTP-binding protein 2, Autoantigen NGP-1	-1.75106	-1.17224	0.671379	4.69223	1.0-10.0%
CL0229	RING	48	13	1.45702	O15344	MID1	E3 ubiquitin-protein ligase Midline-1, 2.3.2.27, Midin, Putative transcription factor XPRF, RING finger protein 59, RING finger protein Midline-1, RING-type E3 ubiquitin transferase Midline-1, Tripartite motif-containing protein 18	-3.1729	-4.22407	-1.20885	0.0618224	0.01-0.1%		CL0023	P-loop_NTPase	34	130	1.33447	P17844	DDX5	Probable ATP-dependent RNA helicase DDX5, 3.6.4.13, DEAD box protein 5, RNA helicase p68	-0.7689	-0.196051	0.652701	4.4947	1.0-10.0%
CL0229	RING	48	13	1.45702	Q9Y314	NOSIP	Nitric oxide synthase-interacting protein, E3 ubiquitin-protein ligase NOSIP, 2.3.2.27, RING-type E3 ubiquitin transferase NOSIP, eNOS-interacting protein	-2.23307	-2.9242	-1.26009	0.054943	0.01-0.1%		CL0023	P-loop_NTPase	34	130	1.33447	Q08211	DHX9	ATP-dependent RNA helicase A, 3.6.4.13, DEAH box protein 9, DExH-box helicase 9, Leukophysin, LKP, Nuclear DNA helicase II, NDH II, RNA helicase A	-0.753926	-0.197232	0.643424	4.39971	1.0-10.0%
CL0031	Phosphatase	49	2	1.43701	O75319	DUSP11	RNA/RNP complex-1-interacting phosphatase, 3.1.3.-, Dual specificity protein phosphatase 11, Phosphatase that interacts with RNA/RNP complex 1	-2.93172	-2.42692	0.440369	2.75657	1.0-10.0%		CL0023	P-loop_NTPase	34	130	1.33447	Q92900	UPF1	Regulator of nonsense transcripts 1, 3.6.4.12, 3.6.4.13, ATP-dependent helicase RENT1, Nonsense mRNA reducing factor 1, NORF1, Up-frameshift suppressor 1 homolog, hUpf1	-1.39672	-0.861517	0.62185	4.18649	1.0-10.0%
CL0031	Phosphatase	49	2	1.43701	Q9H3S7	PTPN23	Tyrosine-protein phosphatase non-receptor type 23, 3.1.3.48, His domain-containing protein tyrosine phosphatase, HD-PTP, Protein tyrosine phosphatase TD14, PTP-TD14	-3.34325	-4.1465	-0.930177	0.117442	0.1-1.0%		CL0023	P-loop_NTPase	34	130	1.33447	P49750	YLPM1	YLP motif-containing protein 1, Nuclear protein ZAP3, ZAP113	-2.96273	-2.33331	0.586029	3.85504	1.0-10.0%
CL0280	PIN	50	6	1.41931	Q9Y324	FCF1	rRNA-processing protein FCF1 homolog	-2.85131	-2.40344	0.434794	2.72141	1.0-10.0%		CL0023	P-loop_NTPase	34	130	1.33447	O60306	AQR	RNA helicase aquarius, 3.6.4.13, Intron-binding protein of 160 kDa, IBP160	-2.10288	-1.59878	0.579076	3.79381	1.0-10.0%
CL0280	PIN	50	6	1.41931	Q9BRU9	UTP23	rRNA-processing protein UTP23 homolog	-3.1289	-3.01436	0.230014	1.6983	1.0-10.0%		CL0023	P-loop_NTPase	34	130	1.33447	O00571	DDX3X	ATP-dependent RNA helicase DDX3X, 3.6.4.13, CAP-Rf, DEAD box protein 3, X-chromosomal, DEAD box, X isoform, DBX, Helicase-like protein 2, HLP2	-0.912045	-0.428289	0.570379	3.7186	1.0-10.0%
CL0280	PIN	50	6	1.41931	Q9ULX3	NOB1	RNA-binding protein NOB1, 3.1.-.-, Phosphorylation regulatory protein HP-10, Protein ART-4	-1.94881	-1.79705	0.222375	1.66869	1.0-10.0%		CL0023	P-loop_NTPase	34	130	1.33447	Q9UPY3	DICER1	Endoribonuclease Dicer, 3.1.26.3, Helicase with RNase motif, Helicase MOI	-3.6189	-3.14511	0.570013	3.71546	1.0-10.0%
CL0280	PIN	50	6	1.41931	Q9H0D6	XRN2	5'-3' exoribonuclease 2, 3.1.13.-, DHM1-like protein, DHP protein	-1.85569	-1.62457	0.116886	1.30884	1.0-10.0%		CL0023	P-loop_NTPase	34	130	1.33447	Q9H6S0	YTHDC2	3'-5' RNA helicase YTHDC2, 3.6.4.13, YTH domain-containing protein 2, hYTHDC2	-2.2173	-1.70562	0.551706	3.5621	1.0-10.0%
CL0280	PIN	50	6	1.41931	Q8IZH2	XRN1	5'-3' exoribonuclease 1, 3.1.13.-, Strand-exchange protein 1 homolog	-2.35869	-2.66869	-0.16951	0.676846	0.1-1.0%		CL0023	P-loop_NTPase	34	130	1.33447	Q9NR30	DDX21	Nucleolar RNA helicase 2, 3.6.4.13, DEAD box protein 21, Gu-alpha, Nucleolar RNA helicase Gu, Nucleolar RNA helicase II, RH II/Gu	-0.75393	-0.306399	0.537008	3.44356	1.0-10.0%
CL0280	PIN	50	6	1.41931	O15091	PRORP	Mitochondrial ribonuclease P catalytic subunit, 3.1.26.5, Mitochondrial ribonuclease P protein 3, Mitochondrial RNase P protein 3, Protein only RNase P catalytic subunit	-3.75929	-4.10435	-0.354816	0.441757	0.1-1.0%		CL0023	P-loop_NTPase	34	130	1.33447	Q13057	COASY	Bifunctional coenzyme A synthase, CoA synthase, NBP, POV-2, Phosphopantetheine adenylyltransferase, 2.7.7.3, Dephospho-CoA pyrophosphorylase, Pantetheine-phosphate adenylyltransferase, PPAT, Dephospho-CoA kinase, DPCK, 2.7.1.24, Dephosphocoenzyme A kinase, DPCOAK	-1.85127	-1.3986	0.524167	3.34324	1.0-10.0%
CL0029	Cupin	51	1	1.35909	Q6P6C2	ALKBH5	RNA demethylase ALKBH5, 1.14.11.53, Alkylated DNA repair protein alkB homolog 5, Alpha-ketoglutarate-dependent dioxygenase alkB homolog 5	-3.91896	-3.98464	0.133247	1.35909	1.0-10.0%		CL0023	P-loop_NTPase	34	130	1.33447	Q92841	DDX17	Probable ATP-dependent RNA helicase DDX17, 3.6.4.13, DEAD box protein 17, DEAD box protein p72, DEAD box protein p82, RNA-dependent helicase p72	-1.28301	-0.856568	0.521535	3.32304	1.0-10.0%
CL0003	SAM	52	3	1.34201	Q9NYL2	MAP3K20	Mitogen-activated protein kinase kinase kinase 20, 2.7.11.25, Human cervical cancer suppressor gene 4 protein, HCCS-4, Leucine zipper- and sterile alpha motif-containing kinase, MLK-like mitogen-activated protein triple kinase, Mitogen-activated protein kinase kinase kinase MLT, Mixed lineage kinase 7, Mixed lineage kinase-related kinase, MLK-related kinase, MRK, Sterile alpha motif- and leucine …	-2.98835	-2.50395	0.529237	3.38249	1.0-10.0%		CL0023	P-loop_NTPase	34	130	1.33447	Q8TDD1	DDX54	ATP-dependent RNA helicase DDX54, 3.6.4.13, ATP-dependent RNA helicase DP97, DEAD box RNA helicase 97 kDa, DEAD box protein 54	-1.30055	-0.92026	0.51026	3.23788	1.0-10.0%
CL0003	SAM	52	3	1.34201	O15357	INPPL1	Phosphatidylinositol 3,4,5-trisphosphate 5-phosphatase 2, 3.1.3.86, Inositol polyphosphate phosphatase-like protein 1, INPPL-1, Protein 51C, SH2 domain-containing inositol 5'-phosphatase 2, SH2 domain-containing inositol phosphatase 2, SHIP-2	-2.69659	-2.83962	-0.249462	0.563039	0.1-1.0%		CL0023	P-loop_NTPase	34	130	1.33447	Q7L2E3	DHX30	ATP-dependent RNA helicase DHX30, 3.6.4.13, DEAH box protein 30	-1.45219	-0.971255	0.480256	3.02173	1.0-10.0%
CL0003	SAM	52	3	1.34201	Q12800	TFCP2	Alpha-globin transcription factor CP2, SAA3 enhancer factor, Transcription factor LSF	-2.62486	-3.71635	-1.09421	0.0804985	0.01-0.1%		CL0023	P-loop_NTPase	34	130	1.33447	Q6P158	DHX57	Putative ATP-dependent RNA helicase DHX57, 3.6.4.13, DEAH box protein 57	-2.26362	-1.78831	0.41788	2.61746	1.0-10.0%
CL0552	Hect	53	3	1.33806	Q9UII4	HERC5	E3 ISG15--protein ligase HERC5, 2.3.2.-, Cyclin-E-binding protein 1, HECT domain and RCC1-like domain-containing protein 5	-2.32102	-1.67668	0.594096	3.92732	1.0-10.0%		CL0023	P-loop_NTPase	34	130	1.33447	Q96GQ7	DDX27	Probable ATP-dependent RNA helicase DDX27, 3.6.4.13, DEAD box protein 27	-1.61098	-1.27108	0.414333	2.59617	1.0-10.0%
CL0552	Hect	53	3	1.33806	Q9ULT8	HECTD1	E3 ubiquitin-protein ligase HECTD1, 2.3.2.26, E3 ligase for inhibin receptor, EULIR, HECT domain-containing protein 1	-2.35756	-3.4021	-1.14264	0.0720039	0.01-0.1%		CL0023	P-loop_NTPase	34	130	1.33447	Q8N8A6	DDX51	ATP-dependent RNA helicase DDX51, 3.6.4.13, DEAD box protein 51	-3.06932	-2.82303	0.36875	2.33749	1.0-10.0%
CL0552	Hect	53	3	1.33806	Q7Z6Z7	HUWE1	E3 ubiquitin-protein ligase HUWE1, 2.3.2.26, ARF-binding protein 1, ARF-BP1, HECT, UBA and WWE domain-containing protein 1, HECT-type E3 ubiquitin transferase HUWE1, Homologous to E6AP carboxyl terminus homologous protein 9, HectH9, Large structure of UREB1, LASU1, Mcl-1 ubiquitin ligase E3, Mule, Upstream regulatory element-binding protein 1, URE-B1, URE-binding protein 1	-1.72871	-2.8084	-1.82841	0.0148452	0.01-0.1%		CL0023	P-loop_NTPase	34	130	1.33447	Q9H2U1	DHX36	ATP-dependent DNA/RNA helicase DHX36, 3.6.4.12, 3.6.4.13, DEAD/H box polypeptide 36, DEAH-box protein 36, G4-resolvase-1, G4R1, MLE-like protein 1, RNA helicase associated with AU-rich element protein	-2.2001	-1.9121	0.368584	2.3366	1.0-10.0%
CL0023	P-loop_NTPase	54	130	1.33447	Q9NVN8	GNL3L	Guanine nucleotide-binding protein-like 3-like protein	-2.2485	-1.25422	1.07948	12.0083	>10.0%		CL0023	P-loop_NTPase	34	130	1.33447	Q9GZR7	DDX24	ATP-dependent RNA helicase DDX24, 3.6.4.13, DEAD box protein 24	-1.96979	-1.70577	0.354046	2.25967	1.0-10.0%
CL0023	P-loop_NTPase	54	130	1.33447	O43896	KIF1C	Kinesin-like protein KIF1C	-2.92997	-2.16607	0.968451	9.29931	1.0-10.0%		CL0023	P-loop_NTPase	34	130	1.33447	Q9BZE4	GTPBP4	GTP-binding protein 4, Chronic renal failure gene protein, GTP-binding protein NGB, Nucleolar GTP-binding protein 1	-1.30903	-1.08928	0.314854	2.06469	1.0-10.0%
CL0023	P-loop_NTPase	54	130	1.33447	Q9BYK8	HELZ2	Helicase with zinc finger domain 2, ATP-dependent helicase PRIC285, Helicase with zinc finger 2, transcriptional coactivator, PPAR-alpha-interacting complex protein 285, PPAR-gamma DNA-binding domain-interacting protein 1, PDIP1, PPAR-gamma DBD-interacting protein 1, Peroxisomal proliferator-activated receptor A-interacting complex 285 kDa protein, 3.6.4.-	-2.94434	-2.15146	0.931044	8.53186	1.0-10.0%		CL0023	P-loop_NTPase	34	130	1.33447	O75616	ERAL1	GTPase Era, mitochondrial, H-ERA, hERA, Conserved ERA-like GTPase, CEGA, ERA-W, ERA-like protein 1	-2.33431	-2.04657	0.307298	2.02907	1.0-10.0%
CL0023	P-loop_NTPase	54	130	1.33447	Q9HCE1	MOV10	Helicase MOV-10, 3.6.4.13, Armitage homolog, Moloney leukemia virus 10 protein	-1.60165	-0.883474	0.818687	6.587	1.0-10.0%		CL0023	P-loop_NTPase	34	130	1.33447	Q8N3C0	ASCC3	Activating signal cointegrator 1 complex subunit 3, 3.6.4.12, ASC-1 complex subunit p200, ASC1p200, Helicase, ATP binding 1, Trip4 complex subunit p200	-2.47636	-2.18842	0.296112	1.97748	1.0-10.0%
CL0023	P-loop_NTPase	54	130	1.33447	Q9NY93	DDX56	Probable ATP-dependent RNA helicase DDX56, 3.6.4.13, ATP-dependent 61 kDa nucleolar RNA helicase, DEAD box protein 21, DEAD box protein 56	-2.13994	-1.44622	0.78978	6.16283	1.0-10.0%		CL0023	P-loop_NTPase	34	130	1.33447	Q8NE71	ABCF1	ATP-binding cassette sub-family F member 1, ATP-binding cassette 50, TNF-alpha-stimulated ABC protein	-1.51511	-1.2902	0.291698	1.95748	1.0-10.0%
CL0023	P-loop_NTPase	54	130	1.33447	Q00839	HNRNPU	Heterogeneous nuclear ribonucleoprotein U, hnRNP U, GRIP120, Nuclear p120 ribonucleoprotein, Scaffold-attachment factor A, SAF-A, p120, pp120	-0.423801	0.248723	0.767511	5.85479	1.0-10.0%		CL0023	P-loop_NTPase	34	130	1.33447	Q9BUJ2	HNRNPUL1	Heterogeneous nuclear ribonucleoprotein U-like protein 1, Adenovirus early region 1B-associated protein 5, E1B-55 kDa-associated protein 5, E1B-AP5	-1.19725	-1.01726	0.282305	1.9156	1.0-10.0%
CL0023	P-loop_NTPase	54	130	1.33447	Q9P2E3	ZNFX1	NFX1-type zinc finger-containing protein 1	-2.58621	-1.90055	0.693428	4.9366	1.0-10.0%		CL0023	P-loop_NTPase	34	130	1.33447	Q14562	DHX8	ATP-dependent RNA helicase DHX8, 3.6.4.13, DEAH box protein 8, RNA helicase HRH1	-2.50035	-2.1553	0.261625	1.82652	1.0-10.0%
CL0023	P-loop_NTPase	54	130	1.33447	Q1KMD3	HNRNPUL2	Heterogeneous nuclear ribonucleoprotein U-like protein 2, Scaffold-attachment factor A2, SAF-A2	-1.9465	-1.33716	0.685736	4.84994	1.0-10.0%		CL0023	P-loop_NTPase	34	130	1.33447	Q8NHQ9	DDX55	ATP-dependent RNA helicase DDX55, 3.6.4.13, DEAD box protein 55	-2.76426	-2.57191	0.210171	1.62245	1.0-10.0%
CL0023	P-loop_NTPase	54	130	1.33447	Q13823	GNL2	Nucleolar GTP-binding protein 2, Autoantigen NGP-1	-1.75106	-1.17224	0.671379	4.69223	1.0-10.0%		CL0023	P-loop_NTPase	34	130	1.33447	Q9H8H2	DDX31	Probable ATP-dependent RNA helicase DDX31, 3.6.4.13, DEAD box protein 31, Helicain	-2.20827	-2.11504	0.18098	1.51698	1.0-10.0%
CL0023	P-loop_NTPase	54	130	1.33447	P17844	DDX5	Probable ATP-dependent RNA helicase DDX5, 3.6.4.13, DEAD box protein 5, RNA helicase p68	-0.7689	-0.196051	0.652701	4.4947	1.0-10.0%		CL0023	P-loop_NTPase	34	130	1.33447	Q8IY37	DHX37	Probable ATP-dependent RNA helicase DHX37, 3.6.4.13, DEAH box protein 37	-2.51004	-2.4118	0.167737	1.47142	1.0-10.0%
CL0023	P-loop_NTPase	54	130	1.33447	Q08211	DHX9	ATP-dependent RNA helicase A, 3.6.4.13, DEAH box protein 9, DExH-box helicase 9, Leukophysin, LKP, Nuclear DNA helicase II, NDH II, RNA helicase A	-0.753926	-0.197232	0.643424	4.39971	1.0-10.0%		CL0023	P-loop_NTPase	34	130	1.33447	Q15029	EFTUD2	116 kDa U5 small nuclear ribonucleoprotein component, Elongation factor Tu GTP-binding domain-containing protein 2, SNU114 homolog, hSNU114, U5 snRNP-specific protein, 116 kDa, U5-116 kDa	-1.10422	-0.973399	0.160317	1.4465	1.0-10.0%
CL0023	P-loop_NTPase	54	130	1.33447	Q92900	UPF1	Regulator of nonsense transcripts 1, 3.6.4.12, 3.6.4.13, ATP-dependent helicase RENT1, Nonsense mRNA reducing factor 1, NORF1, Up-frameshift suppressor 1 homolog, hUpf1	-1.39672	-0.861517	0.62185	4.18649	1.0-10.0%		CL0023	P-loop_NTPase	34	130	1.33447	Q9BX10	GTPBP2	GTP-binding protein 2	-3.67752	-3.62807	0.145339	1.39746	1.0-10.0%
CL0023	P-loop_NTPase	54	130	1.33447	P49750	YLPM1	YLP motif-containing protein 1, Nuclear protein ZAP3, ZAP113	-2.96273	-2.33331	0.586029	3.85504	1.0-10.0%		CL0023	P-loop_NTPase	34	130	1.33447	Q9BVP2	GNL3	Guanine nucleotide-binding protein-like 3, E2-induced gene 3 protein, Novel nucleolar protein 47, NNP47, Nucleolar GTP-binding protein 3, Nucleostemin	-1.54302	-1.34616	0.139185	1.3778	1.0-10.0%
CL0023	P-loop_NTPase	54	130	1.33447	O60306	AQR	RNA helicase aquarius, 3.6.4.13, Intron-binding protein of 160 kDa, IBP160	-2.10288	-1.59878	0.579076	3.79381	1.0-10.0%		CL0023	P-loop_NTPase	34	130	1.33447	O60333	KIF1B	Kinesin-like protein KIF1B, Klp	-3.82451	-3.65292	0.118496	1.3137	1.0-10.0%
CL0023	P-loop_NTPase	54	130	1.33447	O00571	DDX3X	ATP-dependent RNA helicase DDX3X, 3.6.4.13, CAP-Rf, DEAD box protein 3, X-chromosomal, DEAD box, X isoform, DBX, Helicase-like protein 2, HLP2	-0.912045	-0.428289	0.570379	3.7186	1.0-10.0%		CL0023	P-loop_NTPase	34	130	1.33447	Q9NUL7	DDX28	Probable ATP-dependent RNA helicase DDX28, 3.6.4.13, Mitochondrial DEAD box protein 28	-2.59896	-2.30729	0.080742	1.20432	1.0-10.0%
CL0023	P-loop_NTPase	54	130	1.33447	Q9UPY3	DICER1	Endoribonuclease Dicer, 3.1.26.3, Helicase with RNase motif, Helicase MOI	-3.6189	-3.14511	0.570013	3.71546	1.0-10.0%		CL0023	P-loop_NTPase	34	130	1.33447	Q9Y4W6	AFG3L2	AFG3-like protein 2, 3.4.24.-, Paraplegin-like protein	-2.10194	-2.04808	0.0274583	1.06527	1.0-10.0%
CL0023	P-loop_NTPase	54	130	1.33447	Q9H6S0	YTHDC2	3'-5' RNA helicase YTHDC2, 3.6.4.13, YTH domain-containing protein 2, hYTHDC2	-2.2173	-1.70562	0.551706	3.5621	1.0-10.0%		CL0023	P-loop_NTPase	34	130	1.33447	Q14683	SMC1A	Structural maintenance of chromosomes protein 1A, SMC protein 1A, SMC-1-alpha, SMC-1A, Sb1.8	-1.36537	-1.31434	0.015327	1.03592	1.0-10.0%
CL0023	P-loop_NTPase	54	130	1.33447	Q9NR30	DDX21	Nucleolar RNA helicase 2, 3.6.4.13, DEAD box protein 21, Gu-alpha, Nucleolar RNA helicase Gu, Nucleolar RNA helicase II, RH II/Gu	-0.75393	-0.306399	0.537008	3.44356	1.0-10.0%		CL0023	P-loop_NTPase	34	130	1.33447	O14647	CHD2	Chromodomain-helicase-DNA-binding protein 2, CHD-2, 3.6.4.12, ATP-dependent helicase CHD2	-4.04931	-4.04226	0.00933296	1.02172	1.0-10.0%
CL0023	P-loop_NTPase	54	130	1.33447	Q13057	COASY	Bifunctional coenzyme A synthase, CoA synthase, NBP, POV-2, Phosphopantetheine adenylyltransferase, 2.7.7.3, Dephospho-CoA pyrophosphorylase, Pantetheine-phosphate adenylyltransferase, PPAT, Dephospho-CoA kinase, DPCK, 2.7.1.24, Dephosphocoenzyme A kinase, DPCOAK	-1.85127	-1.3986	0.524167	3.34324	1.0-10.0%		CL0023	P-loop_NTPase	34	130	1.33447	Q9Y2R4	DDX52	Probable ATP-dependent RNA helicase DDX52, 3.6.4.13, ATP-dependent RNA helicase ROK1-like, DEAD box protein 52	-2.22517	-2.21333	0.00427443	1.00989	1.0-10.0%
CL0023	P-loop_NTPase	54	130	1.33447	Q92841	DDX17	Probable ATP-dependent RNA helicase DDX17, 3.6.4.13, DEAD box protein 17, DEAD box protein p72, DEAD box protein p82, RNA-dependent helicase p72	-1.28301	-0.856568	0.521535	3.32304	1.0-10.0%		CL0023	P-loop_NTPase	34	130	1.33447	Q9NUQ8	ABCF3	ATP-binding cassette sub-family F member 3	-2.26875	-2.3165	0.000377097	1.00087	1.0-10.0%
CL0023	P-loop_NTPase	54	130	1.33447	Q8TDD1	DDX54	ATP-dependent RNA helicase DDX54, 3.6.4.13, ATP-dependent RNA helicase DP97, DEAD box RNA helicase 97 kDa, DEAD box protein 54	-1.30055	-0.92026	0.51026	3.23788	1.0-10.0%		CL0023	P-loop_NTPase	34	130	1.33447	Q9BQ39	DDX50	ATP-dependent RNA helicase DDX50, 3.6.4.13, DEAD box protein 50, Gu-beta, Nucleolar protein Gu2	-2.34954	-2.46488	-0.0187215	0.957808	0.1-1.0%
CL0023	P-loop_NTPase	54	130	1.33447	Q7L2E3	DHX30	ATP-dependent RNA helicase DHX30, 3.6.4.13, DEAH box protein 30	-1.45219	-0.971255	0.480256	3.02173	1.0-10.0%		CL0023	P-loop_NTPase	34	130	1.33447	Q9NVP1	DDX18	ATP-dependent RNA helicase DDX18, 3.6.4.13, DEAD box protein 18, Myc-regulated DEAD box protein, MrDb	-1.66948	-1.72112	-0.0372563	0.917791	0.1-1.0%
CL0023	P-loop_NTPase	54	130	1.33447	Q6P158	DHX57	Putative ATP-dependent RNA helicase DHX57, 3.6.4.13, DEAH box protein 57	-2.26362	-1.78831	0.41788	2.61746	1.0-10.0%		CL0023	P-loop_NTPase	34	130	1.33447	Q9H089	LSG1	Large subunit GTPase 1 homolog, hLsg1, 3.6.1.-	-2.70861	-2.83676	-0.0396717	0.9127	0.1-1.0%
CL0023	P-loop_NTPase	54	130	1.33447	Q96GQ7	DDX27	Probable ATP-dependent RNA helicase DDX27, 3.6.4.13, DEAD box protein 27	-1.61098	-1.27108	0.414333	2.59617	1.0-10.0%		CL0023	P-loop_NTPase	34	130	1.33447	Q15058	KIF14	Kinesin-like protein KIF14	-3.04602	-2.88005	-0.0422132	0.907375	0.1-1.0%
CL0023	P-loop_NTPase	54	130	1.33447	Q8N8A6	DDX51	ATP-dependent RNA helicase DDX51, 3.6.4.13, DEAD box protein 51	-3.06932	-2.82303	0.36875	2.33749	1.0-10.0%		CL0023	P-loop_NTPase	34	130	1.33447	Q9UG63	ABCF2	ATP-binding cassette sub-family F member 2, Iron-inhibited ABC transporter 2	-1.62731	-1.72712	-0.0849054	0.822422	0.1-1.0%
CL0023	P-loop_NTPase	54	130	1.33447	Q9H2U1	DHX36	ATP-dependent DNA/RNA helicase DHX36, 3.6.4.12, 3.6.4.13, DEAD/H box polypeptide 36, DEAH-box protein 36, G4-resolvase-1, G4R1, MLE-like protein 1, RNA helicase associated with AU-rich element protein	-2.2001	-1.9121	0.368584	2.3366	1.0-10.0%		CL0023	P-loop_NTPase	34	130	1.33447	Q02241	KIF23	Kinesin-like protein KIF23, Kinesin-like protein 5, Mitotic kinesin-like protein 1	-2.47359	-2.35506	-0.0978253	0.798316	0.1-1.0%
CL0023	P-loop_NTPase	54	130	1.33447	Q9GZR7	DDX24	ATP-dependent RNA helicase DDX24, 3.6.4.13, DEAD box protein 24	-1.96979	-1.70577	0.354046	2.25967	1.0-10.0%		CL0023	P-loop_NTPase	34	130	1.33447	Q9H6R0	DHX33	ATP-dependent RNA helicase DHX33, 3.6.4.13, DEAH box protein 33	-2.45909	-2.66249	-0.122026	0.755047	0.1-1.0%
CL0023	P-loop_NTPase	54	130	1.33447	Q9BZE4	GTPBP4	GTP-binding protein 4, Chronic renal failure gene protein, GTP-binding protein NGB, Nucleolar GTP-binding protein 1	-1.30903	-1.08928	0.314854	2.06469	1.0-10.0%		CL0023	P-loop_NTPase	34	130	1.33447	Q5SY16	NOL9	Polynucleotide 5'-hydroxyl-kinase NOL9, 2.7.1.-, Nucleolar protein 9	-2.59431	-2.71939	-0.130552	0.740368	0.1-1.0%
CL0023	P-loop_NTPase	54	130	1.33447	O75616	ERAL1	GTPase Era, mitochondrial, H-ERA, hERA, Conserved ERA-like GTPase, CEGA, ERA-W, ERA-like protein 1	-2.33431	-2.04657	0.307298	2.02907	1.0-10.0%		CL0023	P-loop_NTPase	34	130	1.33447	Q7L014	DDX46	Probable ATP-dependent RNA helicase DDX46, 3.6.4.13, DEAD box protein 46, PRP5 homolog	-1.63582	-1.86136	-0.147561	0.711933	0.1-1.0%
CL0023	P-loop_NTPase	54	130	1.33447	Q8N3C0	ASCC3	Activating signal cointegrator 1 complex subunit 3, 3.6.4.12, ASC-1 complex subunit p200, ASC1p200, Helicase, ATP binding 1, Trip4 complex subunit p200	-2.47636	-2.18842	0.296112	1.97748	1.0-10.0%		CL0023	P-loop_NTPase	34	130	1.33447	Q92499	DDX1	ATP-dependent RNA helicase DDX1, 3.6.4.13, DEAD box protein 1, DEAD box protein retinoblastoma, DBP-RB	-1.53292	-1.78383	-0.176154	0.66657	0.1-1.0%
CL0023	P-loop_NTPase	54	130	1.33447	Q8NE71	ABCF1	ATP-binding cassette sub-family F member 1, ATP-binding cassette 50, TNF-alpha-stimulated ABC protein	-1.51511	-1.2902	0.291698	1.95748	1.0-10.0%		CL0023	P-loop_NTPase	34	130	1.33447	Q9BT17	MTG1	Mitochondrial ribosome-associated GTPase 1, GTP-binding protein 7, Mitochondrial GTPase 1	-3.53464	-3.67975	-0.186342	0.651115	0.1-1.0%
CL0023	P-loop_NTPase	54	130	1.33447	Q9BUJ2	HNRNPUL1	Heterogeneous nuclear ribonucleoprotein U-like protein 1, Adenovirus early region 1B-associated protein 5, E1B-55 kDa-associated protein 5, E1B-AP5	-1.19725	-1.01726	0.282305	1.9156	1.0-10.0%		CL0023	P-loop_NTPase	34	130	1.33447	Q9NU22	MDN1	Midasin, Dynein-related AAA-ATPase MDN1, MIDAS-containing protein	-2.83948	-2.82195	-0.212443	0.613136	0.1-1.0%
CL0023	P-loop_NTPase	54	130	1.33447	Q14562	DHX8	ATP-dependent RNA helicase DHX8, 3.6.4.13, DEAH box protein 8, RNA helicase HRH1	-2.50035	-2.1553	0.261625	1.82652	1.0-10.0%		CL0023	P-loop_NTPase	34	130	1.33447	Q86XP3	DDX42	ATP-dependent RNA helicase DDX42, 3.6.4.13, DEAD box protein 42, RNA helicase-like protein, RHELP, RNA helicase-related protein, RNAHP, SF3b DEAD box protein, Splicing factor 3B-associated 125 kDa protein, SF3b125	-1.88572	-2.21864	-0.244225	0.569869	0.1-1.0%
CL0023	P-loop_NTPase	54	130	1.33447	Q8NHQ9	DDX55	ATP-dependent RNA helicase DDX55, 3.6.4.13, DEAD box protein 55	-2.76426	-2.57191	0.210171	1.62245	1.0-10.0%		CL0023	P-loop_NTPase	34	130	1.33447	Q7Z478	DHX29	ATP-dependent RNA helicase DHX29, 3.6.4.13, DEAH box protein 29, Nucleic acid helicase DDXx	-1.85745	-2.19328	-0.254087	0.557075	0.1-1.0%
CL0023	P-loop_NTPase	54	130	1.33447	Q9H8H2	DDX31	Probable ATP-dependent RNA helicase DDX31, 3.6.4.13, DEAD box protein 31, Helicain	-2.20827	-2.11504	0.18098	1.51698	1.0-10.0%		CL0023	P-loop_NTPase	34	130	1.33447	O60841	EIF5B	Eukaryotic translation initiation factor 5B, eIF-5B, 3.6.5.3, Translation initiation factor IF-2	-1.33879	-1.55155	-0.256943	0.553422	0.1-1.0%
CL0023	P-loop_NTPase	54	130	1.33447	Q8IY37	DHX37	Probable ATP-dependent RNA helicase DHX37, 3.6.4.13, DEAH box protein 37	-2.51004	-2.4118	0.167737	1.47142	1.0-10.0%		CL0023	P-loop_NTPase	34	130	1.33447	O00178	GTPBP1	GTP-binding protein 1, G-protein 1, GP-1, GP1	-3.05732	-3.31425	-0.258017	0.552056	0.1-1.0%
CL0023	P-loop_NTPase	54	130	1.33447	Q15029	EFTUD2	116 kDa U5 small nuclear ribonucleoprotein component, Elongation factor Tu GTP-binding domain-containing protein 2, SNU114 homolog, hSNU114, U5 snRNP-specific protein, 116 kDa, U5-116 kDa	-1.10422	-0.973399	0.160317	1.4465	1.0-10.0%		CL0023	P-loop_NTPase	34	130	1.33447	Q9Y295	DRG1	Developmentally-regulated GTP-binding protein 1, DRG-1, Neural precursor cell expressed developmentally down-regulated protein 3, NEDD-3, Translation factor GTPase DRG1, TRAFAC GTPase DRG1, 3.6.5.-	-2.00748	-2.32567	-0.262942	0.545831	0.1-1.0%
CL0023	P-loop_NTPase	54	130	1.33447	Q9BX10	GTPBP2	GTP-binding protein 2	-3.67752	-3.62807	0.145339	1.39746	1.0-10.0%		CL0023	P-loop_NTPase	34	130	1.33447	Q9Y6V7	DDX49	Probable ATP-dependent RNA helicase DDX49, 3.6.4.13, DEAD box protein 49	-2.60888	-2.99189	-0.272004	0.534559	0.1-1.0%
CL0023	P-loop_NTPase	54	130	1.33447	Q9BVP2	GNL3	Guanine nucleotide-binding protein-like 3, E2-induced gene 3 protein, Novel nucleolar protein 47, NNP47, Nucleolar GTP-binding protein 3, Nucleostemin	-1.54302	-1.34616	0.139185	1.3778	1.0-10.0%		CL0023	P-loop_NTPase	34	130	1.33447	P54132	BLM	RecQ-like DNA helicase BLM, 3.6.4.12, Bloom syndrome protein, DNA helicase, RecQ-like type 2, RecQ2, RecQ protein-like 3	-3.36539	-3.7006	-0.286915	0.516517	0.1-1.0%
CL0023	P-loop_NTPase	54	130	1.33447	O60333	KIF1B	Kinesin-like protein KIF1B, Klp	-3.82451	-3.65292	0.118496	1.3137	1.0-10.0%		CL0023	P-loop_NTPase	34	130	1.33447	P42285	MTREX	Exosome RNA helicase MTR4, 3.6.4.13, ATP-dependent RNA helicase DOB1, ATP-dependent RNA helicase SKIV2L2, Superkiller viralicidic activity 2-like 2, TRAMP-like complex helicase	-1.76432	-2.13141	-0.299052	0.502282	0.1-1.0%
CL0023	P-loop_NTPase	54	130	1.33447	Q9NUL7	DDX28	Probable ATP-dependent RNA helicase DDX28, 3.6.4.13, Mitochondrial DEAD box protein 28	-2.59896	-2.30729	0.080742	1.20432	1.0-10.0%		CL0023	P-loop_NTPase	34	130	1.33447	P26196	DDX6	Probable ATP-dependent RNA helicase DDX6, 3.6.4.13, ATP-dependent RNA helicase p54, DEAD box protein 6, Oncogene RCK	-1.8121	-2.21826	-0.342777	0.454175	0.1-1.0%
CL0023	P-loop_NTPase	54	130	1.33447	Q9Y4W6	AFG3L2	AFG3-like protein 2, 3.4.24.-, Paraplegin-like protein	-2.10194	-2.04808	0.0274583	1.06527	1.0-10.0%		CL0023	P-loop_NTPase	34	130	1.33447	Q13206	DDX10	Probable ATP-dependent RNA helicase DDX10, 3.6.4.13, DEAD box protein 10	-1.06818	-1.43011	-0.349122	0.447588	0.1-1.0%
CL0023	P-loop_NTPase	54	130	1.33447	Q14683	SMC1A	Structural maintenance of chromosomes protein 1A, SMC protein 1A, SMC-1-alpha, SMC-1A, Sb1.8	-1.36537	-1.31434	0.015327	1.03592	1.0-10.0%		CL0023	P-loop_NTPase	34	130	1.33447	P61011	SRP54	Signal recognition particle subunit SRP54, 3.6.5.-, Signal recognition particle 54 kDa protein	-2.43958	-2.78865	-0.35091	0.445748	0.1-1.0%
CL0023	P-loop_NTPase	54	130	1.33447	O14647	CHD2	Chromodomain-helicase-DNA-binding protein 2, CHD-2, 3.6.4.12, ATP-dependent helicase CHD2	-4.04931	-4.04226	0.00933296	1.02172	1.0-10.0%		CL0023	P-loop_NTPase	34	130	1.33447	O43143	DHX15	ATP-dependent RNA helicase DHX15, 3.6.4.13, ATP-dependent RNA helicase #46, DEAH box protein 15, Splicing factor Prp43, hPrp43	-1.21943	-1.54796	-0.399113	0.398921	0.1-1.0%
CL0023	P-loop_NTPase	54	130	1.33447	Q9Y2R4	DDX52	Probable ATP-dependent RNA helicase DDX52, 3.6.4.13, ATP-dependent RNA helicase ROK1-like, DEAD box protein 52	-2.22517	-2.21333	0.00427443	1.00989	1.0-10.0%		CL0023	P-loop_NTPase	34	130	1.33447	Q99661	KIF2C	Kinesin-like protein KIF2C, Kinesin-like protein 6, Mitotic centromere-associated kinesin, MCAK	-2.23871	-2.67828	-0.41734	0.382526	0.1-1.0%
CL0023	P-loop_NTPase	54	130	1.33447	Q9NUQ8	ABCF3	ATP-binding cassette sub-family F member 3	-2.26875	-2.3165	0.000377097	1.00087	1.0-10.0%		CL0023	P-loop_NTPase	34	130	1.33447	Q15477	SKIC2	SKI2 subunit of superkiller complex protein, Helicase SKI2W, Ski2, 3.6.4.13, Helicase-like protein, HLP	-2.58161	-2.93164	-0.428729	0.372624	0.1-1.0%
CL0023	P-loop_NTPase	54	130	1.33447	Q9BQ39	DDX50	ATP-dependent RNA helicase DDX50, 3.6.4.13, DEAD box protein 50, Gu-beta, Nucleolar protein Gu2	-2.34954	-2.46488	-0.0187215	0.957808	0.1-1.0%		CL0023	P-loop_NTPase	34	130	1.33447	Q14527	HLTF	Helicase-like transcription factor, 2.3.2.27, 3.6.4.-, DNA-binding protein/plasminogen activator inhibitor 1 regulator, HIP116, RING finger protein 80, RING-type E3 ubiquitin transferase HLTF, SWI/SNF-related matrix-associated actin-dependent regulator of chromatin subfamily A member 3, Sucrose nonfermenting protein 2-like 3	-2.51918	-2.99681	-0.462707	0.344583	0.1-1.0%
CL0023	P-loop_NTPase	54	130	1.33447	Q9NVP1	DDX18	ATP-dependent RNA helicase DDX18, 3.6.4.13, DEAD box protein 18, Myc-regulated DEAD box protein, MrDb	-1.66948	-1.72112	-0.0372563	0.917791	0.1-1.0%		CL0023	P-loop_NTPase	34	130	1.33447	Q9UHI6	DDX20	Probable ATP-dependent RNA helicase DDX20, 3.6.1.15, 3.6.4.13, Component of gems 3, DEAD box protein 20, DEAD box protein DP 103, Gemin-3	-2.02201	-2.55448	-0.472318	0.33704	0.1-1.0%
CL0023	P-loop_NTPase	54	130	1.33447	Q9H089	LSG1	Large subunit GTPase 1 homolog, hLsg1, 3.6.1.-	-2.70861	-2.83676	-0.0396717	0.9127	0.1-1.0%		CL0023	P-loop_NTPase	34	130	1.33447	A4D1E9	GTPBP10	GTP-binding protein 10, Protein obg homolog 2, ObgH2	-2.83671	-3.33063	-0.475148	0.334852	0.1-1.0%
CL0023	P-loop_NTPase	54	130	1.33447	Q15058	KIF14	Kinesin-like protein KIF14	-3.04602	-2.88005	-0.0422132	0.907375	0.1-1.0%		CL0023	P-loop_NTPase	34	130	1.33447	O14646	CHD1	Chromodomain-helicase-DNA-binding protein 1, CHD-1, 3.6.4.12, ATP-dependent helicase CHD1	-2.52327	-2.61141	-0.503034	0.314026	0.1-1.0%
CL0023	P-loop_NTPase	54	130	1.33447	Q9UG63	ABCF2	ATP-binding cassette sub-family F member 2, Iron-inhibited ABC transporter 2	-1.62731	-1.72712	-0.0849054	0.822422	0.1-1.0%		CL0023	P-loop_NTPase	34	130	1.33447	Q9H0S4	DDX47	Probable ATP-dependent RNA helicase DDX47, 3.6.4.13, DEAD box protein 47	-1.86241	-2.45417	-0.530948	0.294477	0.1-1.0%
CL0023	P-loop_NTPase	54	130	1.33447	Q02241	KIF23	Kinesin-like protein KIF23, Kinesin-like protein 5, Mitotic kinesin-like protein 1	-2.47359	-2.35506	-0.0978253	0.798316	0.1-1.0%		CL0023	P-loop_NTPase	34	130	1.33447	P08240	SRPRA	Signal recognition particle receptor subunit alpha, SR-alpha, Docking protein alpha, DP-alpha	-1.82824	-2.4154	-0.572675	0.267501	0.1-1.0%
CL0023	P-loop_NTPase	54	130	1.33447	Q9H6R0	DHX33	ATP-dependent RNA helicase DHX33, 3.6.4.13, DEAH box protein 33	-2.45909	-2.66249	-0.122026	0.755047	0.1-1.0%		CL0023	P-loop_NTPase	34	130	1.33447	Q9NTK5	OLA1	Obg-like ATPase 1, DNA damage-regulated overexpressed in cancer 45, DOC45, GTP-binding protein 9	-1.77493	-2.35971	-0.594481	0.254401	0.1-1.0%
CL0023	P-loop_NTPase	54	130	1.33447	Q5SY16	NOL9	Polynucleotide 5'-hydroxyl-kinase NOL9, 2.7.1.-, Nucleolar protein 9	-2.59431	-2.71939	-0.130552	0.740368	0.1-1.0%		CL0023	P-loop_NTPase	34	130	1.33447	Q9BUQ8	DDX23	Probable ATP-dependent RNA helicase DDX23, 3.6.4.13, 100 kDa U5 snRNP-specific protein, DEAD box protein 23, PRP28 homolog, U5-100kD	-1.76409	-2.2851	-0.673508	0.212076	0.1-1.0%
CL0023	P-loop_NTPase	54	130	1.33447	Q7L014	DDX46	Probable ATP-dependent RNA helicase DDX46, 3.6.4.13, DEAD box protein 46, PRP5 homolog	-1.63582	-1.86136	-0.147561	0.711933	0.1-1.0%		CL0023	P-loop_NTPase	34	130	1.33447	Q9Y450	HBS1L	HBS1-like protein, ERFS	-2.88631	-3.61273	-0.682085	0.207929	0.1-1.0%
CL0023	P-loop_NTPase	54	130	1.33447	Q92499	DDX1	ATP-dependent RNA helicase DDX1, 3.6.4.13, DEAD box protein 1, DEAD box protein retinoblastoma, DBP-RB	-1.53292	-1.78383	-0.176154	0.66657	0.1-1.0%		CL0023	P-loop_NTPase	34	130	1.33447	O60231	DHX16	Pre-mRNA-splicing factor ATP-dependent RNA helicase DHX16, 3.6.4.13, ATP-dependent RNA helicase #3, DEAH-box protein 16	-2.35261	-3.08461	-0.700106	0.199477	0.1-1.0%
CL0023	P-loop_NTPase	54	130	1.33447	Q9BT17	MTG1	Mitochondrial ribosome-associated GTPase 1, GTP-binding protein 7, Mitochondrial GTPase 1	-3.53464	-3.67975	-0.186342	0.651115	0.1-1.0%		CL0023	P-loop_NTPase	34	130	1.33447	P52732	KIF11	Kinesin-like protein KIF11, Kinesin-like protein 1, Kinesin-like spindle protein HKSP, Kinesin-related motor protein Eg5, Thyroid receptor-interacting protein 5, TR-interacting protein 5, TRIP-5	-2.53544	-3.36709	-0.72885	0.186702	0.1-1.0%
CL0023	P-loop_NTPase	54	130	1.33447	Q9NU22	MDN1	Midasin, Dynein-related AAA-ATPase MDN1, MIDAS-containing protein	-2.83948	-2.82195	-0.212443	0.613136	0.1-1.0%		CL0023	P-loop_NTPase	34	130	1.33447	P13639	EEF2	Elongation factor 2, EF-2	-0.0138232	-0.760362	-0.753756	0.176297	0.1-1.0%
CL0023	P-loop_NTPase	54	130	1.33447	Q86XP3	DDX42	ATP-dependent RNA helicase DDX42, 3.6.4.13, DEAD box protein 42, RNA helicase-like protein, RHELP, RNA helicase-related protein, RNAHP, SF3b DEAD box protein, Splicing factor 3B-associated 125 kDa protein, SF3b125	-1.88572	-2.21864	-0.244225	0.569869	0.1-1.0%		CL0023	P-loop_NTPase	34	130	1.33447	P51398	DAP3	28S ribosomal protein S29, mitochondrial, MRP-S29, S29mt, Death-associated protein 3, DAP-3, Ionizing radiation resistance conferring protein, Mitochondrial small ribosomal subunit protein mS29	-2.3825	-3.13119	-0.762181	0.17291	0.1-1.0%
CL0023	P-loop_NTPase	54	130	1.33447	Q7Z478	DHX29	ATP-dependent RNA helicase DHX29, 3.6.4.13, DEAH box protein 29, Nucleic acid helicase DDXx	-1.85745	-2.19328	-0.254087	0.557075	0.1-1.0%		CL0023	P-loop_NTPase	34	130	1.33447	Q9BQ75	CMSS1	Protein CMSS1, Cms1 ribosomal small subunit homolog	-2.4244	-3.31613	-0.790037	0.162167	0.1-1.0%
CL0023	P-loop_NTPase	54	130	1.33447	O60841	EIF5B	Eukaryotic translation initiation factor 5B, eIF-5B, 3.6.5.3, Translation initiation factor IF-2	-1.33879	-1.55155	-0.256943	0.553422	0.1-1.0%		CL0023	P-loop_NTPase	34	130	1.33447	P60842	EIF4A1	Eukaryotic initiation factor 4A-I, eIF-4A-I, eIF4A-I, 3.6.4.13, ATP-dependent RNA helicase eIF4A-1	-0.429279	-1.30166	-0.842347	0.143765	0.1-1.0%
CL0023	P-loop_NTPase	54	130	1.33447	O00178	GTPBP1	GTP-binding protein 1, G-protein 1, GP-1, GP1	-3.05732	-3.31425	-0.258017	0.552056	0.1-1.0%		CL0023	P-loop_NTPase	34	130	1.33447	Q8IYB8	SUPV3L1	ATP-dependent RNA helicase SUPV3L1, mitochondrial, 3.6.4.13, Suppressor of var1 3-like protein 1, SUV3-like protein 1	-2.7544	-3.55163	-0.853648	0.140072	0.1-1.0%
CL0023	P-loop_NTPase	54	130	1.33447	Q9Y295	DRG1	Developmentally-regulated GTP-binding protein 1, DRG-1, Neural precursor cell expressed developmentally down-regulated protein 3, NEDD-3, Translation factor GTPase DRG1, TRAFAC GTPase DRG1, 3.6.5.-	-2.00748	-2.32567	-0.262942	0.545831	0.1-1.0%		CL0023	P-loop_NTPase	34	130	1.33447	O75643	SNRNP200	U5 small nuclear ribonucleoprotein 200 kDa helicase, 3.6.4.13, Activating signal cointegrator 1 complex subunit 3-like 1, BRR2 homolog, U5 snRNP-specific 200 kDa protein, U5-200KD	-1.13411	-1.99405	-0.892899	0.127968	0.1-1.0%
CL0023	P-loop_NTPase	54	130	1.33447	Q9Y6V7	DDX49	Probable ATP-dependent RNA helicase DDX49, 3.6.4.13, DEAD box protein 49	-2.60888	-2.99189	-0.272004	0.534559	0.1-1.0%		CL0023	P-loop_NTPase	34	130	1.33447	Q14240	EIF4A2	Eukaryotic initiation factor 4A-II, eIF-4A-II, eIF4A-II, 3.6.4.13, ATP-dependent RNA helicase eIF4A-2	-2.39296	-3.22601	-0.927773	0.118094	0.1-1.0%
CL0023	P-loop_NTPase	54	130	1.33447	P54132	BLM	RecQ-like DNA helicase BLM, 3.6.4.12, Bloom syndrome protein, DNA helicase, RecQ-like type 2, RecQ2, RecQ protein-like 3	-3.36539	-3.7006	-0.286915	0.516517	0.1-1.0%		CL0023	P-loop_NTPase	34	130	1.33447	Q15645	TRIP13	Pachytene checkpoint protein 2 homolog, Human papillomavirus type 16 E1 protein-binding protein, 16E1-BP, HPV16 E1 protein-binding protein, Thyroid hormone receptor interactor 13, Thyroid receptor-interacting protein 13, TR-interacting protein 13, TRIP-13	-1.22174	-1.75504	-0.933559	0.116531	0.1-1.0%
CL0023	P-loop_NTPase	54	130	1.33447	P42285	MTREX	Exosome RNA helicase MTR4, 3.6.4.13, ATP-dependent RNA helicase DOB1, ATP-dependent RNA helicase SKIV2L2, Superkiller viralicidic activity 2-like 2, TRAMP-like complex helicase	-1.76432	-2.13141	-0.299052	0.502282	0.1-1.0%		CL0023	P-loop_NTPase	34	130	1.33447	P38919	EIF4A3	Eukaryotic initiation factor 4A-III, eIF-4A-III, eIF4A-III, 3.6.4.13, ATP-dependent RNA helicase DDX48, ATP-dependent RNA helicase eIF4A-3, DEAD box protein 48, Eukaryotic initiation factor 4A-like NUK-34, Eukaryotic translation initiation factor 4A isoform 3, Nuclear matrix protein 265, NMP 265, hNMP 265	-1.0491	-2.02851	-0.936516	0.11574	0.1-1.0%
CL0023	P-loop_NTPase	54	130	1.33447	P26196	DDX6	Probable ATP-dependent RNA helicase DDX6, 3.6.4.13, ATP-dependent RNA helicase p54, DEAD box protein 6, Oncogene RCK	-1.8121	-2.21826	-0.342777	0.454175	0.1-1.0%		CL0023	P-loop_NTPase	34	130	1.33447	P23919	DTYMK	Thymidylate kinase, 2.7.4.9, dTMP kinase	-1.5642	-2.32804	-0.97686	0.105473	0.1-1.0%
CL0023	P-loop_NTPase	54	130	1.33447	Q13206	DDX10	Probable ATP-dependent RNA helicase DDX10, 3.6.4.13, DEAD box protein 10	-1.06818	-1.43011	-0.349122	0.447588	0.1-1.0%		CL0023	P-loop_NTPase	34	130	1.33447	Q13838	DDX39B	Spliceosome RNA helicase DDX39B, 3.6.4.13, 56 kDa U2AF65-associated protein, ATP-dependent RNA helicase p47, DEAD box protein UAP56, HLA-B-associated transcript 1 protein	-1.14092	-2.20329	-1.00776	0.0982291	0.01-0.1%
CL0023	P-loop_NTPase	54	130	1.33447	P61011	SRP54	Signal recognition particle subunit SRP54, 3.6.5.-, Signal recognition particle 54 kDa protein	-2.43958	-2.78865	-0.35091	0.445748	0.1-1.0%		CL0023	P-loop_NTPase	34	130	1.33447	Q9H0A0	NAT10	RNA cytidine acetyltransferase, 2.3.1.-, 18S rRNA cytosine acetyltransferase, N-acetyltransferase 10, N-acetyltransferase-like protein, hALP	-1.4432	-2.0694	-1.05328	0.0884545	0.01-0.1%
CL0023	P-loop_NTPase	54	130	1.33447	O43143	DHX15	ATP-dependent RNA helicase DHX15, 3.6.4.13, ATP-dependent RNA helicase #46, DEAH box protein 15, Splicing factor Prp43, hPrp43	-1.21943	-1.54796	-0.399113	0.398921	0.1-1.0%		CL0023	P-loop_NTPase	34	130	1.33447	Q9HD67	MYO10	Unconventional myosin-X, Unconventional myosin-10	-3.71827	-4.37218	-1.06277	0.0865429	0.01-0.1%
CL0023	P-loop_NTPase	54	130	1.33447	Q99661	KIF2C	Kinesin-like protein KIF2C, Kinesin-like protein 6, Mitotic centromere-associated kinesin, MCAK	-2.23871	-2.67828	-0.41734	0.382526	0.1-1.0%		CL0023	P-loop_NTPase	34	130	1.33447	Q96RP9	GFM1	Elongation factor G, mitochondrial, EF-Gmt, Elongation factor G 1, mitochondrial, mEF-G 1, Elongation factor G1, hEFG1	-1.89499	-2.82656	-1.08064	0.0830536	0.01-0.1%
CL0023	P-loop_NTPase	54	130	1.33447	Q15477	SKIC2	SKI2 subunit of superkiller complex protein, Helicase SKI2W, Ski2, 3.6.4.13, Helicase-like protein, HLP	-2.58161	-2.93164	-0.428729	0.372624	0.1-1.0%		CL0023	P-loop_NTPase	34	130	1.33447	Q9UDY2	TJP2	Tight junction protein ZO-2, Tight junction protein 2, Zona occludens protein 2, Zonula occludens protein 2	-2.24204	-3.28323	-1.11434	0.0768529	0.01-0.1%
CL0023	P-loop_NTPase	54	130	1.33447	Q14527	HLTF	Helicase-like transcription factor, 2.3.2.27, 3.6.4.-, DNA-binding protein/plasminogen activator inhibitor 1 regulator, HIP116, RING finger protein 80, RING-type E3 ubiquitin transferase HLTF, SWI/SNF-related matrix-associated actin-dependent regulator of chromatin subfamily A member 3, Sucrose nonfermenting protein 2-like 3	-2.51918	-2.99681	-0.462707	0.344583	0.1-1.0%		CL0023	P-loop_NTPase	34	130	1.33447	P15170	GSPT1	Eukaryotic peptide chain release factor GTP-binding subunit ERF3A, Eukaryotic peptide chain release factor subunit 3a, eRF3a, G1 to S phase transition protein 1 homolog	-1.32636	-2.12423	-1.12226	0.0754638	0.01-0.1%
CL0023	P-loop_NTPase	54	130	1.33447	Q9UHI6	DDX20	Probable ATP-dependent RNA helicase DDX20, 3.6.1.15, 3.6.4.13, Component of gems 3, DEAD box protein 20, DEAD box protein DP 103, Gemin-3	-2.02201	-2.55448	-0.472318	0.33704	0.1-1.0%		CL0023	P-loop_NTPase	34	130	1.33447	Q14204	DYNC1H1	Cytoplasmic dynein 1 heavy chain 1, Cytoplasmic dynein heavy chain 1, Dynein heavy chain, cytosolic	-1.02476	-2.01314	-1.20314	0.0626407	0.01-0.1%
CL0023	P-loop_NTPase	54	130	1.33447	A4D1E9	GTPBP10	GTP-binding protein 10, Protein obg homolog 2, ObgH2	-2.83671	-3.33063	-0.475148	0.334852	0.1-1.0%		CL0023	P-loop_NTPase	34	130	1.33447	Q14839	CHD4	Chromodomain-helicase-DNA-binding protein 4, CHD-4, 3.6.4.12, ATP-dependent helicase CHD4, Mi-2 autoantigen 218 kDa protein, Mi2-beta	-1.58344	-2.48072	-1.21008	0.0616485	0.01-0.1%
CL0023	P-loop_NTPase	54	130	1.33447	O14646	CHD1	Chromodomain-helicase-DNA-binding protein 1, CHD-1, 3.6.4.12, ATP-dependent helicase CHD1	-2.52327	-2.61141	-0.503034	0.314026	0.1-1.0%		CL0023	P-loop_NTPase	34	130	1.33447	O95299	NDUFA10	NADH dehydrogenase [ubiquinone] 1 alpha subcomplex subunit 10, mitochondrial, Complex I-42kD, CI-42kD, NADH-ubiquinone oxidoreductase 42 kDa subunit	-2.51493	-3.69959	-1.21582	0.0608392	0.01-0.1%
CL0023	P-loop_NTPase	54	130	1.33447	Q9H0S4	DDX47	Probable ATP-dependent RNA helicase DDX47, 3.6.4.13, DEAD box protein 47	-1.86241	-2.45417	-0.530948	0.294477	0.1-1.0%		CL0023	P-loop_NTPase	34	130	1.33447	P52701	MSH6	DNA mismatch repair protein Msh6, hMSH6, G/T mismatch-binding protein, GTBP, GTMBP, MutS protein homolog 6, MutS-alpha 160 kDa subunit, p160	-1.6424	-2.76374	-1.23382	0.0583687	0.01-0.1%
CL0023	P-loop_NTPase	54	130	1.33447	P08240	SRPRA	Signal recognition particle receptor subunit alpha, SR-alpha, Docking protein alpha, DP-alpha	-1.82824	-2.4154	-0.572675	0.267501	0.1-1.0%		CL0023	P-loop_NTPase	34	130	1.33447	O95239	KIF4A	Chromosome-associated kinesin KIF4A, Chromokinesin-A	-2.63433	-3.69474	-1.23928	0.0576395	0.01-0.1%
CL0023	P-loop_NTPase	54	130	1.33447	Q9NTK5	OLA1	Obg-like ATPase 1, DNA damage-regulated overexpressed in cancer 45, DOC45, GTP-binding protein 9	-1.77493	-2.35971	-0.594481	0.254401	0.1-1.0%		CL0023	P-loop_NTPase	34	130	1.33447	P62826	RAN	GTP-binding nuclear protein Ran, 3.6.5.-, Androgen receptor-associated protein 24, GTPase Ran, Ras-like protein TC4, Ras-related nuclear protein	-0.455356	-1.74016	-1.24566	0.0567995	0.01-0.1%
CL0023	P-loop_NTPase	54	130	1.33447	Q9BUQ8	DDX23	Probable ATP-dependent RNA helicase DDX23, 3.6.4.13, 100 kDa U5 snRNP-specific protein, DEAD box protein 23, PRP28 homolog, U5-100kD	-1.76409	-2.2851	-0.673508	0.212076	0.1-1.0%		CL0023	P-loop_NTPase	34	130	1.33447	P33176	KIF5B	Kinesin-1 heavy chain, Conventional kinesin heavy chain, Ubiquitous kinesin heavy chain, UKHC	-1.53778	-2.90437	-1.33232	0.0465246	0.01-0.1%
CL0023	P-loop_NTPase	54	130	1.33447	Q9Y450	HBS1L	HBS1-like protein, ERFS	-2.88631	-3.61273	-0.682085	0.207929	0.1-1.0%		CL0023	P-loop_NTPase	34	130	1.33447	P35580	MYH10	Myosin-10, Cellular myosin heavy chain, type B, Myosin heavy chain 10, Myosin heavy chain, non-muscle IIb, Non-muscle myosin heavy chain B, NMMHC-B, Non-muscle myosin heavy chain IIb, NMMHC II-b, NMMHC-IIB	-1.79041	-2.8487	-1.34023	0.0456848	0.01-0.1%
CL0023	P-loop_NTPase	54	130	1.33447	O60231	DHX16	Pre-mRNA-splicing factor ATP-dependent RNA helicase DHX16, 3.6.4.13, ATP-dependent RNA helicase #3, DEAH-box protein 16	-2.35261	-3.08461	-0.700106	0.199477	0.1-1.0%		CL0023	P-loop_NTPase	34	130	1.33447	P46063	RECQL	ATP-dependent DNA helicase Q1, 3.6.4.12, DNA helicase, RecQ-like type 1, RecQ1, DNA-dependent ATPase Q1, RecQ protein-like 1	-1.73817	-3.15665	-1.35391	0.0442683	0.01-0.1%
CL0023	P-loop_NTPase	54	130	1.33447	P52732	KIF11	Kinesin-like protein KIF11, Kinesin-like protein 1, Kinesin-like spindle protein HKSP, Kinesin-related motor protein Eg5, Thyroid receptor-interacting protein 5, TR-interacting protein 5, TRIP-5	-2.53544	-3.36709	-0.72885	0.186702	0.1-1.0%		CL0023	P-loop_NTPase	34	130	1.33447	Q12965	MYO1E	Unconventional myosin-Ie, Myosin-Ic, Unconventional myosin 1E	-1.64247	-2.88575	-1.36688	0.0429653	0.01-0.1%
CL0023	P-loop_NTPase	54	130	1.33447	P13639	EEF2	Elongation factor 2, EF-2	-0.0138232	-0.760362	-0.753756	0.176297	0.1-1.0%		CL0023	P-loop_NTPase	34	130	1.33447	O95347	SMC2	Structural maintenance of chromosomes protein 2, SMC protein 2, SMC-2, Chromosome-associated protein E, hCAP-E, XCAP-E homolog	-1.56626	-2.69092	-1.37591	0.0420809	0.01-0.1%
CL0023	P-loop_NTPase	54	130	1.33447	P51398	DAP3	28S ribosomal protein S29, mitochondrial, MRP-S29, S29mt, Death-associated protein 3, DAP-3, Ionizing radiation resistance conferring protein, Mitochondrial small ribosomal subunit protein mS29	-2.3825	-3.13119	-0.762181	0.17291	0.1-1.0%		CL0023	P-loop_NTPase	34	130	1.33447	Q92878	RAD50	DNA repair protein RAD50, hRAD50, 3.6.-.-	-1.87543	-3.1661	-1.4168	0.0383004	0.01-0.1%
CL0023	P-loop_NTPase	54	130	1.33447	Q9BQ75	CMSS1	Protein CMSS1, Cms1 ribosomal small subunit homolog	-2.4244	-3.31613	-0.790037	0.162167	0.1-1.0%		CL0023	P-loop_NTPase	34	130	1.33447	P55039	DRG2	Developmentally-regulated GTP-binding protein 2, DRG-2, Translation factor GTPase DRG2, TRAFAC GTPase DRG2, 3.6.5.-	-2.07513	-3.38523	-1.42419	0.0376535	0.01-0.1%
CL0023	P-loop_NTPase	54	130	1.33447	P60842	EIF4A1	Eukaryotic initiation factor 4A-I, eIF-4A-I, eIF4A-I, 3.6.4.13, ATP-dependent RNA helicase eIF4A-1	-0.429279	-1.30166	-0.842347	0.143765	0.1-1.0%		CL0023	P-loop_NTPase	34	130	1.33447	P61221	ABCE1	ATP-binding cassette sub-family E member 1, 2'-5'-oligoadenylate-binding protein, HuHP68, RNase L inhibitor, Ribonuclease 4 inhibitor, RNS4I	-1.88167	-3.38787	-1.48976	0.0323776	0.01-0.1%
CL0023	P-loop_NTPase	54	130	1.33447	Q8IYB8	SUPV3L1	ATP-dependent RNA helicase SUPV3L1, mitochondrial, 3.6.4.13, Suppressor of var1 3-like protein 1, SUV3-like protein 1	-2.7544	-3.55163	-0.853648	0.140072	0.1-1.0%		CL0023	P-loop_NTPase	34	130	1.33447	P06576	ATP5F1B	ATP synthase subunit beta, mitochondrial, 7.1.2.2, ATP synthase F1 subunit beta	-0.851009	-2.15291	-1.55485	0.0278707	0.01-0.1%
CL0023	P-loop_NTPase	54	130	1.33447	O75643	SNRNP200	U5 small nuclear ribonucleoprotein 200 kDa helicase, 3.6.4.13, Activating signal cointegrator 1 complex subunit 3-like 1, BRR2 homolog, U5 snRNP-specific 200 kDa protein, U5-200KD	-1.13411	-1.99405	-0.892899	0.127968	0.1-1.0%		CL0023	P-loop_NTPase	34	130	1.33447	Q6UB35	MTHFD1L	Monofunctional C1-tetrahydrofolate synthase, mitochondrial, 6.3.4.3, Formyltetrahydrofolate synthetase	-2.00634	-3.41703	-1.57338	0.0267066	0.01-0.1%
CL0023	P-loop_NTPase	54	130	1.33447	Q14240	EIF4A2	Eukaryotic initiation factor 4A-II, eIF-4A-II, eIF4A-II, 3.6.4.13, ATP-dependent RNA helicase eIF4A-2	-2.39296	-3.22601	-0.927773	0.118094	0.1-1.0%		CL0023	P-loop_NTPase	34	130	1.33447	P25205	MCM3	DNA replication licensing factor MCM3, 3.6.4.12, DNA polymerase alpha holoenzyme-associated protein P1, P1-MCM3, RLF subunit beta, p102	-1.44871	-2.82228	-1.5847	0.0260197	0.01-0.1%
CL0023	P-loop_NTPase	54	130	1.33447	Q15645	TRIP13	Pachytene checkpoint protein 2 homolog, Human papillomavirus type 16 E1 protein-binding protein, 16E1-BP, HPV16 E1 protein-binding protein, Thyroid hormone receptor interactor 13, Thyroid receptor-interacting protein 13, TR-interacting protein 13, TRIP-13	-1.22174	-1.75504	-0.933559	0.116531	0.1-1.0%		CL0023	P-loop_NTPase	34	130	1.33447	P49411	TUFM	Elongation factor Tu, mitochondrial, EF-Tu, P43	-1.03453	-2.47047	-1.60825	0.0246464	0.01-0.1%
CL0023	P-loop_NTPase	54	130	1.33447	P38919	EIF4A3	Eukaryotic initiation factor 4A-III, eIF-4A-III, eIF4A-III, 3.6.4.13, ATP-dependent RNA helicase DDX48, ATP-dependent RNA helicase eIF4A-3, DEAD box protein 48, Eukaryotic initiation factor 4A-like NUK-34, Eukaryotic translation initiation factor 4A isoform 3, Nuclear matrix protein 265, NMP 265, hNMP 265	-1.0491	-2.02851	-0.936516	0.11574	0.1-1.0%		CL0023	P-loop_NTPase	34	130	1.33447	P68104	EEF1A1	Elongation factor 1-alpha 1, EF-1-alpha-1, Elongation factor Tu, EF-Tu, Eukaryotic elongation factor 1 A-1, eEF1A-1, Leukocyte receptor cluster member 7	0.165462	-1.28622	-1.68502	0.020653	0.01-0.1%
CL0023	P-loop_NTPase	54	130	1.33447	P23919	DTYMK	Thymidylate kinase, 2.7.4.9, dTMP kinase	-1.5642	-2.32804	-0.97686	0.105473	0.1-1.0%		CL0023	P-loop_NTPase	34	130	1.33447	P35579	MYH9	Myosin, heavy polypeptide 9, non-muscle, isoform CRA_a	-0.317844	-1.69288	-1.72326	0.0189119	0.01-0.1%
CL0023	P-loop_NTPase	54	130	1.33447	Q13838	DDX39B	Spliceosome RNA helicase DDX39B, 3.6.4.13, 56 kDa U2AF65-associated protein, ATP-dependent RNA helicase p47, DEAD box protein UAP56, HLA-B-associated transcript 1 protein	-1.14092	-2.20329	-1.00776	0.0982291	0.01-0.1%		CL0023	P-loop_NTPase	34	130	1.33447	K7EJE8	LONP1	Lon protease homolog, mitochondrial, 3.4.21.53, Lon protease-like protein, LONP, Mitochondrial ATP-dependent protease Lon, Serine protease 15	-1.33923	-2.93955	-1.77691	0.0167144	0.01-0.1%
CL0023	P-loop_NTPase	54	130	1.33447	Q9H0A0	NAT10	RNA cytidine acetyltransferase, 2.3.1.-, 18S rRNA cytosine acetyltransferase, N-acetyltransferase 10, N-acetyltransferase-like protein, hALP	-1.4432	-2.0694	-1.05328	0.0884545	0.01-0.1%		CL0023	P-loop_NTPase	34	130	1.33447	P27144	AK4	Adenylate kinase 4, mitochondrial, AK 4, 2.7.4.10, 2.7.4.6, Adenylate kinase 3-like, GTP:AMP phosphotransferase AK4	-2.06447	-3.93916	-1.90527	0.0124375	0.01-0.1%
CL0023	P-loop_NTPase	54	130	1.33447	Q9HD67	MYO10	Unconventional myosin-X, Unconventional myosin-10	-3.71827	-4.37218	-1.06277	0.0865429	0.01-0.1%		CL0023	P-loop_NTPase	34	130	1.33447	P28288	ABCD3	ATP-binding cassette sub-family D member 3, 3.1.2.-, 7.6.2.-, 70 kDa peroxisomal membrane protein, PMP70	-1.59647	-3.52283	-1.93454	0.0116268	0.01-0.1%
CL0023	P-loop_NTPase	54	130	1.33447	Q96RP9	GFM1	Elongation factor G, mitochondrial, EF-Gmt, Elongation factor G 1, mitochondrial, mEF-G 1, Elongation factor G1, hEFG1	-1.89499	-2.82656	-1.08064	0.0830536	0.01-0.1%		CL0023	P-loop_NTPase	34	130	1.33447	P38606	ATP6V1A	V-type proton ATPase catalytic subunit A, V-ATPase subunit A, 7.1.2.2, V-ATPase 69 kDa subunit, Vacuolar ATPase isoform VA68, Vacuolar proton pump subunit alpha	-1.87681	-3.52157	-2.07347	0.0084436	<0.01%
CL0023	P-loop_NTPase	54	130	1.33447	Q9UDY2	TJP2	Tight junction protein ZO-2, Tight junction protein 2, Zona occludens protein 2, Zonula occludens protein 2	-2.24204	-3.28323	-1.11434	0.0768529	0.01-0.1%		CL0023	P-loop_NTPase	34	130	1.33447	P11586	MTHFD1	C-1-tetrahydrofolate synthase, cytoplasmic, C1-THF synthase, Epididymis secretory sperm binding protein, Methylenetetrahydrofolate dehydrogenase, 1.5.1.5, Methenyltetrahydrofolate cyclohydrolase, 3.5.4.9, Formyltetrahydrofolate synthetase, 6.3.4.3	-1.3351	-3.05981	-2.09352	0.00806276	<0.01%
CL0023	P-loop_NTPase	54	130	1.33447	P15170	GSPT1	Eukaryotic peptide chain release factor GTP-binding subunit ERF3A, Eukaryotic peptide chain release factor subunit 3a, eRF3a, G1 to S phase transition protein 1 homolog	-1.32636	-2.12423	-1.12226	0.0754638	0.01-0.1%		CL0023	P-loop_NTPase	34	130	1.33447	O00159	MYO1C	Unconventional myosin-Ic, Myosin I beta, MMI-beta, MMIb	-1.65094	-3.49167	-2.10453	0.00786086	<0.01%
CL0023	P-loop_NTPase	54	130	1.33447	Q14204	DYNC1H1	Cytoplasmic dynein 1 heavy chain 1, Cytoplasmic dynein heavy chain 1, Dynein heavy chain, cytosolic	-1.02476	-2.01314	-1.20314	0.0626407	0.01-0.1%		CL0023	P-loop_NTPase	34	130	1.33447	P25705	ATP5F1A	ATP synthase subunit alpha, mitochondrial, ATP synthase F1 subunit alpha	-0.713937	-2.73009	-2.12421	0.00751254	<0.01%
CL0023	P-loop_NTPase	54	130	1.33447	Q14839	CHD4	Chromodomain-helicase-DNA-binding protein 4, CHD-4, 3.6.4.12, ATP-dependent helicase CHD4, Mi-2 autoantigen 218 kDa protein, Mi2-beta	-1.58344	-2.48072	-1.21008	0.0616485	0.01-0.1%		CL0023	P-loop_NTPase	34	130	1.33447	P55072	VCP	Transitional endoplasmic reticulum ATPase, TER ATPase, 3.6.4.6, 15S Mg(2+)-ATPase p97 subunit, Valosin-containing protein, VCP	-0.930731	-2.37985	-2.1258	0.00748507	<0.01%
CL0023	P-loop_NTPase	54	130	1.33447	O95299	NDUFA10	NADH dehydrogenase [ubiquinone] 1 alpha subcomplex subunit 10, mitochondrial, Complex I-42kD, CI-42kD, NADH-ubiquinone oxidoreductase 42 kDa subunit	-2.51493	-3.69959	-1.21582	0.0608392	0.01-0.1%		CL0023	P-loop_NTPase	34	130	1.33447	P40938	RFC3	Replication factor C subunit 3, Activator 1 38 kDa subunit, A1 38 kDa subunit, Activator 1 subunit 3, Replication factor C 38 kDa subunit, RF-C 38 kDa subunit, RFC38	-2.42499	-4.42558	-2.1676	0.00679832	<0.01%
CL0023	P-loop_NTPase	54	130	1.33447	P52701	MSH6	DNA mismatch repair protein Msh6, hMSH6, G/T mismatch-binding protein, GTBP, GTMBP, MutS protein homolog 6, MutS-alpha 160 kDa subunit, p160	-1.6424	-2.76374	-1.23382	0.0583687	0.01-0.1%		CL0023	P-loop_NTPase	34	130	1.33447	Q9Y230	RUVBL2	RuvB-like 2, 3.6.4.12, 48 kDa TATA box-binding protein-interacting protein, 48 kDa TBP-interacting protein, 51 kDa erythrocyte cytosolic protein, ECP-51, INO80 complex subunit J, Repressing pontin 52, Reptin 52, TIP49b, TIP60-associated protein 54-beta, TAP54-beta	-1.37346	-3.19297	-2.19591	0.0063693	<0.01%
CL0023	P-loop_NTPase	54	130	1.33447	O95239	KIF4A	Chromosome-associated kinesin KIF4A, Chromokinesin-A	-2.63433	-3.69474	-1.23928	0.0576395	0.01-0.1%		CL0023	P-loop_NTPase	34	130	1.33447	P09543	CNP	2',3'-cyclic-nucleotide 3'-phosphodiesterase, CNP, CNPase, 3.1.4.37	-2.17291	-4.10291	-2.19893	0.00632507	<0.01%
CL0023	P-loop_NTPase	54	130	1.33447	P62826	RAN	GTP-binding nuclear protein Ran, 3.6.5.-, Androgen receptor-associated protein 24, GTPase Ran, Ras-like protein TC4, Ras-related nuclear protein	-0.455356	-1.74016	-1.24566	0.0567995	0.01-0.1%		CL0575	EFTPs	35	14	1.33146	Q14692	BMS1	Ribosome biogenesis protein BMS1 homolog, Ribosome assembly protein BMS1 homolog	-1.73072	-0.922838	0.893705	7.82898	1.0-10.0%
CL0023	P-loop_NTPase	54	130	1.33447	P33176	KIF5B	Kinesin-1 heavy chain, Conventional kinesin heavy chain, Ubiquitous kinesin heavy chain, UKHC	-1.53778	-2.90437	-1.33232	0.0465246	0.01-0.1%		CL0575	EFTPs	35	14	1.33146	Q9NY12	GAR1	H/ACA ribonucleoprotein complex subunit 1, Nucleolar protein family A member 1, snoRNP protein GAR1	-2.28041	-1.67745	0.697511	4.98323	1.0-10.0%
CL0023	P-loop_NTPase	54	130	1.33447	P35580	MYH10	Myosin-10, Cellular myosin heavy chain, type B, Myosin heavy chain 10, Myosin heavy chain, non-muscle IIb, Non-muscle myosin heavy chain B, NMMHC-B, Non-muscle myosin heavy chain IIb, NMMHC II-b, NMMHC-IIB	-1.79041	-2.8487	-1.34023	0.0456848	0.01-0.1%		CL0575	EFTPs	35	14	1.33146	P09001	MRPL3	39S ribosomal protein L3, mitochondrial, L3mt, MRP-L3, Mitochondrial large ribosomal subunit protein uL3m	-2.23622	-1.9597	0.315436	2.06745	1.0-10.0%
CL0023	P-loop_NTPase	54	130	1.33447	P46063	RECQL	ATP-dependent DNA helicase Q1, 3.6.4.12, DNA helicase, RecQ-like type 1, RecQ1, DNA-dependent ATPase Q1, RecQ protein-like 1	-1.73817	-3.15665	-1.35391	0.0442683	0.01-0.1%		CL0575	EFTPs	35	14	1.33146	Q15029	EFTUD2	116 kDa U5 small nuclear ribonucleoprotein component, Elongation factor Tu GTP-binding domain-containing protein 2, SNU114 homolog, hSNU114, U5 snRNP-specific protein, 116 kDa, U5-116 kDa	-1.10422	-0.973399	0.160317	1.4465	1.0-10.0%
CL0023	P-loop_NTPase	54	130	1.33447	Q12965	MYO1E	Unconventional myosin-Ie, Myosin-Ic, Unconventional myosin 1E	-1.64247	-2.88575	-1.36688	0.0429653	0.01-0.1%		CL0575	EFTPs	35	14	1.33146	P39023	RPL3	60S ribosomal protein L3, HIV-1 TAR RNA-binding protein B, TARBP-B, Large ribosomal subunit protein uL3	-0.543413	-0.785879	-0.149362	0.708987	0.1-1.0%
CL0023	P-loop_NTPase	54	130	1.33447	O95347	SMC2	Structural maintenance of chromosomes protein 2, SMC protein 2, SMC-2, Chromosome-associated protein E, hCAP-E, XCAP-E homolog	-1.56626	-2.69092	-1.37591	0.0420809	0.01-0.1%		CL0575	EFTPs	35	14	1.33146	O60841	EIF5B	Eukaryotic translation initiation factor 5B, eIF-5B, 3.6.5.3, Translation initiation factor IF-2	-1.33879	-1.55155	-0.256943	0.553422	0.1-1.0%
CL0023	P-loop_NTPase	54	130	1.33447	Q92878	RAD50	DNA repair protein RAD50, hRAD50, 3.6.-.-	-1.87543	-3.1661	-1.4168	0.0383004	0.01-0.1%		CL0575	EFTPs	35	14	1.33146	Q2NL82	TSR1	Pre-rRNA-processing protein TSR1 homolog	-1.63036	-1.88469	-0.600598	0.250843	0.1-1.0%
CL0023	P-loop_NTPase	54	130	1.33447	P55039	DRG2	Developmentally-regulated GTP-binding protein 2, DRG-2, Translation factor GTPase DRG2, TRAFAC GTPase DRG2, 3.6.5.-	-2.07513	-3.38523	-1.42419	0.0376535	0.01-0.1%		CL0575	EFTPs	35	14	1.33146	P18077	RPL35A	60S ribosomal protein L35a, Cell growth-inhibiting gene 33 protein, Large ribosomal subunit protein eL33	-0.97113	-1.76583	-0.671673	0.212974	0.1-1.0%
CL0023	P-loop_NTPase	54	130	1.33447	P61221	ABCE1	ATP-binding cassette sub-family E member 1, 2'-5'-oligoadenylate-binding protein, HuHP68, RNase L inhibitor, Ribonuclease 4 inhibitor, RNS4I	-1.88167	-3.38787	-1.48976	0.0323776	0.01-0.1%		CL0575	EFTPs	35	14	1.33146	Q9Y450	HBS1L	HBS1-like protein, ERFS	-2.88631	-3.61273	-0.682085	0.207929	0.1-1.0%
CL0023	P-loop_NTPase	54	130	1.33447	P06576	ATP5F1B	ATP synthase subunit beta, mitochondrial, 7.1.2.2, ATP synthase F1 subunit beta	-0.851009	-2.15291	-1.55485	0.0278707	0.01-0.1%		CL0575	EFTPs	35	14	1.33146	P13639	EEF2	Elongation factor 2, EF-2	-0.0138232	-0.760362	-0.753756	0.176297	0.1-1.0%
CL0023	P-loop_NTPase	54	130	1.33447	Q6UB35	MTHFD1L	Monofunctional C1-tetrahydrofolate synthase, mitochondrial, 6.3.4.3, Formyltetrahydrofolate synthetase	-2.00634	-3.41703	-1.57338	0.0267066	0.01-0.1%		CL0575	EFTPs	35	14	1.33146	Q96RP9	GFM1	Elongation factor G, mitochondrial, EF-Gmt, Elongation factor G 1, mitochondrial, mEF-G 1, Elongation factor G1, hEFG1	-1.89499	-2.82656	-1.08064	0.0830536	0.01-0.1%
CL0023	P-loop_NTPase	54	130	1.33447	P25205	MCM3	DNA replication licensing factor MCM3, 3.6.4.12, DNA polymerase alpha holoenzyme-associated protein P1, P1-MCM3, RLF subunit beta, p102	-1.44871	-2.82228	-1.5847	0.0260197	0.01-0.1%		CL0575	EFTPs	35	14	1.33146	P15170	GSPT1	Eukaryotic peptide chain release factor GTP-binding subunit ERF3A, Eukaryotic peptide chain release factor subunit 3a, eRF3a, G1 to S phase transition protein 1 homolog	-1.32636	-2.12423	-1.12226	0.0754638	0.01-0.1%
CL0023	P-loop_NTPase	54	130	1.33447	P49411	TUFM	Elongation factor Tu, mitochondrial, EF-Tu, P43	-1.03453	-2.47047	-1.60825	0.0246464	0.01-0.1%		CL0575	EFTPs	35	14	1.33146	P49411	TUFM	Elongation factor Tu, mitochondrial, EF-Tu, P43	-1.03453	-2.47047	-1.60825	0.0246464	0.01-0.1%
CL0023	P-loop_NTPase	54	130	1.33447	P68104	EEF1A1	Elongation factor 1-alpha 1, EF-1-alpha-1, Elongation factor Tu, EF-Tu, Eukaryotic elongation factor 1 A-1, eEF1A-1, Leukocyte receptor cluster member 7	0.165462	-1.28622	-1.68502	0.020653	0.01-0.1%		CL0575	EFTPs	35	14	1.33146	P68104	EEF1A1	Elongation factor 1-alpha 1, EF-1-alpha-1, Elongation factor Tu, EF-Tu, Eukaryotic elongation factor 1 A-1, eEF1A-1, Leukocyte receptor cluster member 7	0.165462	-1.28622	-1.68502	0.020653	0.01-0.1%
CL0023	P-loop_NTPase	54	130	1.33447	P35579	MYH9	Myosin, heavy polypeptide 9, non-muscle, isoform CRA_a	-0.317844	-1.69288	-1.72326	0.0189119	0.01-0.1%		CL0361	C2H2-zf	36	7	1.30545	Q96KR1	ZFR	Zinc finger RNA-binding protein, hZFR, M-phase phosphoprotein homolog	-1.93827	-1.56035	0.44515	2.78708	1.0-10.0%
CL0023	P-loop_NTPase	54	130	1.33447	K7EJE8	LONP1	Lon protease homolog, mitochondrial, 3.4.21.53, Lon protease-like protein, LONP, Mitochondrial ATP-dependent protease Lon, Serine protease 15	-1.33923	-2.93955	-1.77691	0.0167144	0.01-0.1%		CL0361	C2H2-zf	36	7	1.30545	Q969S3	ZNF622	Cytoplasmic 60S subunit biogenesis factor ZNF622, Zinc finger protein 622, Zinc finger-like protein 9	-2.19964	-1.97356	0.314372	2.0624	1.0-10.0%
CL0023	P-loop_NTPase	54	130	1.33447	P27144	AK4	Adenylate kinase 4, mitochondrial, AK 4, 2.7.4.10, 2.7.4.6, Adenylate kinase 3-like, GTP:AMP phosphotransferase AK4	-2.06447	-3.93916	-1.90527	0.0124375	0.01-0.1%		CL0361	C2H2-zf	36	7	1.30545	Q14966	ZNF638	Zinc finger protein 638, Cutaneous T-cell lymphoma-associated antigen se33-1, CTCL-associated antigen se33-1, Nuclear protein 220, Zinc finger matrin-like protein	-2.3324	-2.08468	0.181079	1.51733	1.0-10.0%
CL0023	P-loop_NTPase	54	130	1.33447	P28288	ABCD3	ATP-binding cassette sub-family D member 3, 3.1.2.-, 7.6.2.-, 70 kDa peroxisomal membrane protein, PMP70	-1.59647	-3.52283	-1.93454	0.0116268	0.01-0.1%		CL0361	C2H2-zf	36	7	1.30545	Q12874	SF3A3	Splicing factor 3A subunit 3, SF3a60, Spliceosome-associated protein 61, SAP 61	-1.74835	-1.78026	0.0732042	1.1836	1.0-10.0%
CL0023	P-loop_NTPase	54	130	1.33447	P38606	ATP6V1A	V-type proton ATPase catalytic subunit A, V-ATPase subunit A, 7.1.2.2, V-ATPase 69 kDa subunit, Vacuolar ATPase isoform VA68, Vacuolar proton pump subunit alpha	-1.87681	-3.52157	-2.07347	0.0084436	<0.01%		CL0361	C2H2-zf	36	7	1.30545	Q9BXP5	SRRT	Serrate RNA effector molecule homolog, Arsenite-resistance protein 2	-1.68785	-1.86884	-0.128817	0.743332	0.1-1.0%
CL0023	P-loop_NTPase	54	130	1.33447	P11586	MTHFD1	C-1-tetrahydrofolate synthase, cytoplasmic, C1-THF synthase, Epididymis secretory sperm binding protein, Methylenetetrahydrofolate dehydrogenase, 1.5.1.5, Methenyltetrahydrofolate cyclohydrolase, 3.5.4.9, Formyltetrahydrofolate synthetase, 6.3.4.3	-1.3351	-3.05981	-2.09352	0.00806276	<0.01%		CL0361	C2H2-zf	36	7	1.30545	Q5F1R6	DNAJC21	DnaJ homolog subfamily C member 21, DnaJ homolog subfamily A member 5, Protein GS3	-2.74792	-3.10352	-0.251797	0.560019	0.1-1.0%
CL0023	P-loop_NTPase	54	130	1.33447	O00159	MYO1C	Unconventional myosin-Ic, Myosin I beta, MMI-beta, MMIb	-1.65094	-3.49167	-2.10453	0.00786086	<0.01%		CL0361	C2H2-zf	36	7	1.30545	Q15428	SF3A2	Splicing factor 3A subunit 2, SF3a66, Spliceosome-associated protein 62, SAP 62	-1.95214	-2.52816	-0.546095	0.284384	0.1-1.0%
CL0023	P-loop_NTPase	54	130	1.33447	P25705	ATP5F1A	ATP synthase subunit alpha, mitochondrial, ATP synthase F1 subunit alpha	-0.713937	-2.73009	-2.12421	0.00751254	<0.01%		CL0125	Peptidase_CA	37	5	1.21933	Q14694	USP10	Ubiquitin carboxyl-terminal hydrolase 10, 3.4.19.12, Deubiquitinating enzyme 10, Ubiquitin thioesterase 10, Ubiquitin-specific-processing protease 10	-2.19752	-1.74537	0.515812	3.27953	1.0-10.0%
CL0023	P-loop_NTPase	54	130	1.33447	P55072	VCP	Transitional endoplasmic reticulum ATPase, TER ATPase, 3.6.4.6, 15S Mg(2+)-ATPase p97 subunit, Valosin-containing protein, VCP	-0.930731	-2.37985	-2.1258	0.00748507	<0.01%		CL0125	Peptidase_CA	37	5	1.21933	Q9P275	USP36	Ubiquitin carboxyl-terminal hydrolase 36, 3.4.19.12, Deubiquitinating enzyme 36, Ubiquitin thioesterase 36, Ubiquitin-specific-processing protease 36	-2.03298	-1.70034	0.394639	2.48107	1.0-10.0%
CL0023	P-loop_NTPase	54	130	1.33447	P40938	RFC3	Replication factor C subunit 3, Activator 1 38 kDa subunit, A1 38 kDa subunit, Activator 1 subunit 3, Replication factor C 38 kDa subunit, RF-C 38 kDa subunit, RFC38	-2.42499	-4.42558	-2.1676	0.00679832	<0.01%		CL0125	Peptidase_CA	37	5	1.21933	P17655	CAPN2	Calpain-2 catalytic subunit, 3.4.22.53, Calcium-activated neutral proteinase 2, CANP 2, Calpain M-type, Calpain large polypeptide L2, Calpain-2 large subunit, Millimolar-calpain, M-calpain	-1.80847	-1.8998	-0.682119	0.207913	0.1-1.0%
CL0023	P-loop_NTPase	54	130	1.33447	Q9Y230	RUVBL2	RuvB-like 2, 3.6.4.12, 48 kDa TATA box-binding protein-interacting protein, 48 kDa TBP-interacting protein, 51 kDa erythrocyte cytosolic protein, ECP-51, INO80 complex subunit J, Repressing pontin 52, Reptin 52, TIP49b, TIP60-associated protein 54-beta, TAP54-beta	-1.37346	-3.19297	-2.19591	0.0063693	<0.01%		CL0125	Peptidase_CA	37	5	1.21933	Q93009	USP7	Ubiquitin carboxyl-terminal hydrolase 7, 3.4.19.12, Deubiquitinating enzyme 7, Herpesvirus-associated ubiquitin-specific protease, Ubiquitin thioesterase 7, Ubiquitin-specific-processing protease 7	-1.83666	-2.92513	-1.0763	0.0838883	0.01-0.1%
CL0023	P-loop_NTPase	54	130	1.33447	P09543	CNP	2',3'-cyclic-nucleotide 3'-phosphodiesterase, CNP, CNPase, 3.1.4.37	-2.17291	-4.10291	-2.19893	0.00632507	<0.01%		CL0125	Peptidase_CA	37	5	1.21933	Q93008	USP9X	Probable ubiquitin carboxyl-terminal hydrolase FAF-X, 3.4.19.12, Deubiquitinating enzyme FAF-X, Fat facets in mammals, hFAM, Fat facets protein-related, X-linked, Ubiquitin thioesterase FAF-X, Ubiquitin-specific protease 9, X chromosome, Ubiquitin-specific-processing protease FAF-X	-2.18911	-3.37046	-1.35406	0.044253	0.01-0.1%
CL0575	EFTPs	55	14	1.33146	Q14692	BMS1	Ribosome biogenesis protein BMS1 homolog, Ribosome assembly protein BMS1 homolog	-1.73072	-0.922838	0.893705	7.82898	1.0-10.0%		CL0186	Beta_propeller	38	37	1.14272	Q8IWA0	WDR75	WD repeat-containing protein 75, U3 small nucleolar RNA-associated protein 17 homolog	-1.85164	-1.07616	0.878885	7.56632	1.0-10.0%
CL0575	EFTPs	55	14	1.33146	Q9NY12	GAR1	H/ACA ribonucleoprotein complex subunit 1, Nucleolar protein family A member 1, snoRNP protein GAR1	-2.28041	-1.67745	0.697511	4.98323	1.0-10.0%		CL0186	Beta_propeller	38	37	1.14272	Q9NV06	DCAF13	DDB1- and CUL4-associated factor 13, WD repeat and SOF domain-containing protein 1	-2.24899	-1.62473	0.723073	5.28534	1.0-10.0%
CL0575	EFTPs	55	14	1.33146	P09001	MRPL3	39S ribosomal protein L3, mitochondrial, L3mt, MRP-L3, Mitochondrial large ribosomal subunit protein uL3m	-2.23622	-1.9597	0.315436	2.06745	1.0-10.0%		CL0186	Beta_propeller	38	37	1.14272	Q8TED0	UTP15	U3 small nucleolar RNA-associated protein 15 homolog	-1.9305	-1.31624	0.717945	5.2233	1.0-10.0%
CL0575	EFTPs	55	14	1.33146	Q15029	EFTUD2	116 kDa U5 small nuclear ribonucleoprotein component, Elongation factor Tu GTP-binding domain-containing protein 2, SNU114 homolog, hSNU114, U5 snRNP-specific protein, 116 kDa, U5-116 kDa	-1.10422	-0.973399	0.160317	1.4465	1.0-10.0%		CL0186	Beta_propeller	38	37	1.14272	Q9UII4	HERC5	E3 ISG15--protein ligase HERC5, 2.3.2.-, Cyclin-E-binding protein 1, HECT domain and RCC1-like domain-containing protein 5	-2.32102	-1.67668	0.594096	3.92732	1.0-10.0%
CL0575	EFTPs	55	14	1.33146	P39023	RPL3	60S ribosomal protein L3, HIV-1 TAR RNA-binding protein B, TARBP-B, Large ribosomal subunit protein uL3	-0.543413	-0.785879	-0.149362	0.708987	0.1-1.0%		CL0186	Beta_propeller	38	37	1.14272	Q15269	PWP2	Periodic tryptophan protein 2 homolog	-1.75117	-1.29466	0.534758	3.42577	1.0-10.0%
CL0575	EFTPs	55	14	1.33146	O60841	EIF5B	Eukaryotic translation initiation factor 5B, eIF-5B, 3.6.5.3, Translation initiation factor IF-2	-1.33879	-1.55155	-0.256943	0.553422	0.1-1.0%		CL0186	Beta_propeller	38	37	1.14272	Q9C0J8	WDR33	pre-mRNA 3' end processing protein WDR33, WD repeat-containing protein 33, WD repeat-containing protein of 146 kDa	-2.35194	-1.9054	0.484786	3.05342	1.0-10.0%
CL0575	EFTPs	55	14	1.33146	Q2NL82	TSR1	Pre-rRNA-processing protein TSR1 homolog	-1.63036	-1.88469	-0.600598	0.250843	0.1-1.0%		CL0186	Beta_propeller	38	37	1.14272	Q96I51	RCC1L	RCC1-like G exchanging factor-like protein, RCC1-like, Williams-Beuren syndrome chromosomal region 16 protein	-2.58183	-2.2577	0.352573	2.25202	1.0-10.0%
CL0575	EFTPs	55	14	1.33146	P18077	RPL35A	60S ribosomal protein L35a, Cell growth-inhibiting gene 33 protein, Large ribosomal subunit protein eL33	-0.97113	-1.76583	-0.671673	0.212974	0.1-1.0%		CL0186	Beta_propeller	38	37	1.14272	Q9H2Y7	ZNF106	Zinc finger protein 106, Zfp-106, Zinc finger protein 474	-3.34128	-3.11546	0.343663	2.20629	1.0-10.0%
CL0575	EFTPs	55	14	1.33146	Q9Y450	HBS1L	HBS1-like protein, ERFS	-2.88631	-3.61273	-0.682085	0.207929	0.1-1.0%		CL0186	Beta_propeller	38	37	1.14272	Q9P2D0	IBTK	Inhibitor of Bruton tyrosine kinase, IBtk	-3.0107	-2.90489	0.164848	1.46167	1.0-10.0%
CL0575	EFTPs	55	14	1.33146	P13639	EEF2	Elongation factor 2, EF-2	-0.0138232	-0.760362	-0.753756	0.176297	0.1-1.0%		CL0186	Beta_propeller	38	37	1.14272	Q14137	BOP1	Ribosome biogenesis protein BOP1, Block of proliferation 1 protein	-1.86353	-2.07468	-0.128358	0.744119	0.1-1.0%
CL0575	EFTPs	55	14	1.33146	Q96RP9	GFM1	Elongation factor G, mitochondrial, EF-Gmt, Elongation factor G 1, mitochondrial, mEF-G 1, Elongation factor G1, hEFG1	-1.89499	-2.82656	-1.08064	0.0830536	0.01-0.1%		CL0186	Beta_propeller	38	37	1.14272	Q15061	WDR43	WD repeat-containing protein 43, U3 small nucleolar RNA-associated protein 5 homolog	-1.83201	-2.04041	-0.137931	0.727896	0.1-1.0%
CL0575	EFTPs	55	14	1.33146	P15170	GSPT1	Eukaryotic peptide chain release factor GTP-binding subunit ERF3A, Eukaryotic peptide chain release factor subunit 3a, eRF3a, G1 to S phase transition protein 1 homolog	-1.32636	-2.12423	-1.12226	0.0754638	0.01-0.1%		CL0186	Beta_propeller	38	37	1.14272	Q9Y4P3	TBL2	Transducin beta-like protein 2, WS beta-transducin repeats protein, WS-betaTRP, Williams-Beuren syndrome chromosomal region 13 protein	-2.30952	-2.5357	-0.144533	0.716914	0.1-1.0%
CL0575	EFTPs	55	14	1.33146	P49411	TUFM	Elongation factor Tu, mitochondrial, EF-Tu, P43	-1.03453	-2.47047	-1.60825	0.0246464	0.01-0.1%		CL0186	Beta_propeller	38	37	1.14272	Q969X6	UTP4	U3 small nucleolar RNA-associated protein 4 homolog, Cirhin, UTP4 small subunit processome component	-1.90275	-2.11986	-0.160612	0.690857	0.1-1.0%
CL0575	EFTPs	55	14	1.33146	P68104	EEF1A1	Elongation factor 1-alpha 1, EF-1-alpha-1, Elongation factor Tu, EF-Tu, Eukaryotic elongation factor 1 A-1, eEF1A-1, Leukocyte receptor cluster member 7	0.165462	-1.28622	-1.68502	0.020653	0.01-0.1%		CL0186	Beta_propeller	38	37	1.14272	Q9UNX4	WDR3	WD repeat-containing protein 3	-2.03548	-2.30509	-0.194811	0.638542	0.1-1.0%
CL0175	TRASH	56	2	1.32761	P83731	RPL24	60S ribosomal protein L24, 60S ribosomal protein L30, Large ribosomal subunit protein eL24	-0.911853	-0.705436	0.313881	2.06007	1.0-10.0%		CL0186	Beta_propeller	38	37	1.14272	Q8TBB5	KLHDC4	Kelch domain-containing protein 4	-2.85243	-2.94607	-0.280217	0.524545	0.1-1.0%
CL0175	TRASH	56	2	1.32761	P53582	METAP1	Methionine aminopeptidase 1, MAP 1, MetAP 1, 3.4.11.18, Peptidase M 1	-2.17685	-2.44995	-0.225366	0.595161	0.1-1.0%		CL0186	Beta_propeller	38	37	1.14272	Q8TEQ6	GEMIN5	Gem-associated protein 5, Gemin5	-1.6038	-1.89604	-0.294271	0.507842	0.1-1.0%
CL0361	C2H2-zf	57	7	1.30545	Q96KR1	ZFR	Zinc finger RNA-binding protein, hZFR, M-phase phosphoprotein homolog	-1.93827	-1.56035	0.44515	2.78708	1.0-10.0%		CL0186	Beta_propeller	38	37	1.14272	Q07954	LRP1	Prolow-density lipoprotein receptor-related protein 1, LRP-1, Alpha-2-macroglobulin receptor, A2MR, Apolipoprotein E receptor, APOER, CD91	-3.84553	-3.64325	-0.308978	0.490933	0.1-1.0%
CL0361	C2H2-zf	57	7	1.30545	Q969S3	ZNF622	Cytoplasmic 60S subunit biogenesis factor ZNF622, Zinc finger protein 622, Zinc finger-like protein 9	-2.19964	-1.97356	0.314372	2.0624	1.0-10.0%		CL0186	Beta_propeller	38	37	1.14272	Q9HC35	EML4	Echinoderm microtubule-associated protein-like 4, EMAP-4, Restrictedly overexpressed proliferation-associated protein, Ropp 120	-1.939	-2.38779	-0.368658	0.427899	0.1-1.0%
CL0361	C2H2-zf	57	7	1.30545	Q14966	ZNF638	Zinc finger protein 638, Cutaneous T-cell lymphoma-associated antigen se33-1, CTCL-associated antigen se33-1, Nuclear protein 220, Zinc finger matrin-like protein	-2.3324	-2.08468	0.181079	1.51733	1.0-10.0%		CL0186	Beta_propeller	38	37	1.14272	Q9BY44	EIF2A	Eukaryotic translation initiation factor 2A, eIF-2A, 65 kDa eukaryotic translation initiation factor 2A	-1.58718	-2.05098	-0.421933	0.378501	0.1-1.0%
CL0361	C2H2-zf	57	7	1.30545	Q12874	SF3A3	Splicing factor 3A subunit 3, SF3a60, Spliceosome-associated protein 61, SAP 61	-1.74835	-1.78026	0.0732042	1.1836	1.0-10.0%		CL0186	Beta_propeller	38	37	1.14272	P53621	COPA	Coatomer subunit alpha, Alpha-coat protein, Alpha-COP, HEP-COP, HEPCOP	-1.16622	-1.1529	-0.522823	0.300038	0.1-1.0%
CL0361	C2H2-zf	57	7	1.30545	Q9BXP5	SRRT	Serrate RNA effector molecule homolog, Arsenite-resistance protein 2	-1.68785	-1.86884	-0.128817	0.743332	0.1-1.0%		CL0186	Beta_propeller	38	37	1.14272	P63244	RACK1	Receptor of activated protein C kinase 1, Cell proliferation-inducing gene 21 protein, Guanine nucleotide-binding protein subunit beta-2-like 1, Guanine nucleotide-binding protein subunit beta-like protein 12.3, Human lung cancer oncogene 7 protein, HLC-7, Receptor for activated C kinase, Small ribosomal subunit protein RACK1	-0.762486	-1.4639	-0.626988	0.236054	0.1-1.0%
CL0361	C2H2-zf	57	7	1.30545	Q5F1R6	DNAJC21	DnaJ homolog subfamily C member 21, DnaJ homolog subfamily A member 5, Protein GS3	-2.74792	-3.10352	-0.251797	0.560019	0.1-1.0%		CL0186	Beta_propeller	38	37	1.14272	Q12769	NUP160	Nuclear pore complex protein Nup160, 160 kDa nucleoporin, Nucleoporin Nup160	-2.08003	-2.80811	-0.702674	0.198301	0.1-1.0%
CL0361	C2H2-zf	57	7	1.30545	Q15428	SF3A2	Splicing factor 3A subunit 2, SF3a66, Spliceosome-associated protein 62, SAP 62	-1.95214	-2.52816	-0.546095	0.284384	0.1-1.0%		CL0186	Beta_propeller	38	37	1.14272	Q05048	CSTF1	Cleavage stimulation factor subunit 1, CF-1 50 kDa subunit, Cleavage stimulation factor 50 kDa subunit, CSTF 50 kDa subunit, CstF-50	-2.18113	-2.46628	-0.726759	0.187603	0.1-1.0%
CL0366	JAB	58	2	1.29662	Q6P2Q9	PRPF8	Pre-mRNA-processing-splicing factor 8, 220 kDa U5 snRNP-specific protein, PRP8 homolog, Splicing factor Prp8, p220	-1.05075	-0.71818	0.412968	2.58802	1.0-10.0%		CL0186	Beta_propeller	38	37	1.14272	O43818	RRP9	U3 small nucleolar RNA-interacting protein 2, RRP9 homolog, U3 small nucleolar ribonucleoprotein-associated 55 kDa protein, U3 snoRNP-associated 55 kDa protein, U3-55K	-2.00918	-2.94348	-0.860598	0.137848	0.1-1.0%
CL0366	JAB	58	2	1.29662	Q8TAT6	NPLOC4	Nuclear protein localization protein 4 homolog, Protein NPL4	-2.12324	-3.74627	-2.28159	0.0052289	<0.01%		CL0186	Beta_propeller	38	37	1.14272	Q9NWT1	PAK1IP1	p21-activated protein kinase-interacting protein 1, PAK/PLC-interacting protein 1, hPIP1, PAK1-interacting protein 1, WD repeat-containing protein 84	-2.02887	-3.06079	-0.930328	0.117401	0.1-1.0%
CL0125	Peptidase_CA	59	5	1.21933	Q14694	USP10	Ubiquitin carboxyl-terminal hydrolase 10, 3.4.19.12, Deubiquitinating enzyme 10, Ubiquitin thioesterase 10, Ubiquitin-specific-processing protease 10	-2.19752	-1.74537	0.515812	3.27953	1.0-10.0%		CL0186	Beta_propeller	38	37	1.14272	Q9P258	RCC2	Protein RCC2, RCC1-like protein TD-60, Telophase disk protein of 60 kDa	-1.37614	-2.36751	-0.937542	0.115467	0.1-1.0%
CL0125	Peptidase_CA	59	5	1.21933	Q9P275	USP36	Ubiquitin carboxyl-terminal hydrolase 36, 3.4.19.12, Deubiquitinating enzyme 36, Ubiquitin thioesterase 36, Ubiquitin-specific-processing protease 36	-2.03298	-1.70034	0.394639	2.48107	1.0-10.0%		CL0186	Beta_propeller	38	37	1.14272	Q6RFH5	WDR74	WD repeat-containing protein 74, NOP seven-associated protein 1	-2.58698	-3.44225	-0.959398	0.1098	0.1-1.0%
CL0125	Peptidase_CA	59	5	1.21933	P17655	CAPN2	Calpain-2 catalytic subunit, 3.4.22.53, Calcium-activated neutral proteinase 2, CANP 2, Calpain M-type, Calpain large polypeptide L2, Calpain-2 large subunit, Millimolar-calpain, M-calpain	-1.80847	-1.8998	-0.682119	0.207913	0.1-1.0%		CL0186	Beta_propeller	38	37	1.14272	Q9Y3F4	STRAP	Serine-threonine kinase receptor-associated protein, MAP activator with WD repeats, UNR-interacting protein, WD-40 repeat protein PT-WD	-1.40855	-2.39823	-0.96537	0.1083	0.1-1.0%
CL0125	Peptidase_CA	59	5	1.21933	Q93009	USP7	Ubiquitin carboxyl-terminal hydrolase 7, 3.4.19.12, Deubiquitinating enzyme 7, Herpesvirus-associated ubiquitin-specific protease, Ubiquitin thioesterase 7, Ubiquitin-specific-processing protease 7	-1.83666	-2.92513	-1.0763	0.0838883	0.01-0.1%		CL0186	Beta_propeller	38	37	1.14272	Q12788	TBL3	Transducin beta-like protein 3, WD repeat-containing protein SAZD	-1.91641	-2.78308	-1.01331	0.0969827	0.01-0.1%
CL0125	Peptidase_CA	59	5	1.21933	Q93008	USP9X	Probable ubiquitin carboxyl-terminal hydrolase FAF-X, 3.4.19.12, Deubiquitinating enzyme FAF-X, Fat facets in mammals, hFAM, Fat facets protein-related, X-linked, Ubiquitin thioesterase FAF-X, Ubiquitin-specific protease 9, X chromosome, Ubiquitin-specific-processing protease FAF-X	-2.18911	-3.37046	-1.35406	0.044253	0.01-0.1%		CL0186	Beta_propeller	38	37	1.14272	Q8NI36	WDR36	WD repeat-containing protein 36, T-cell activation WD repeat-containing protein, TA-WDRP	-1.94475	-2.65483	-1.03695	0.0918428	0.01-0.1%
CL0673	GYF	60	2	1.18093	Q6Y7W6	GIGYF2	GRB10-interacting GYF protein 2, PERQ amino acid-rich with GYF domain-containing protein 2, Trinucleotide repeat-containing gene 15 protein	-2.30982	-2.01535	0.370552	2.34721	1.0-10.0%		CL0186	Beta_propeller	38	37	1.14272	Q9NNW5	WDR6	WD repeat-containing protein 6	-2.81242	-3.82645	-1.16102	0.0690211	0.01-0.1%
CL0673	GYF	60	2	1.18093	O75165	DNAJC13	DnaJ homolog subfamily C member 13, Required for receptor-mediated endocytosis 8, RME-8	-2.95039	-4.43612	-1.83432	0.0146448	0.01-0.1%		CL0186	Beta_propeller	38	37	1.14272	P35606	COPB2	Coatomer subunit beta', Beta'-coat protein, Beta'-COP, p102	-1.49448	-2.52734	-1.2539	0.0557308	0.01-0.1%
CL0186	Beta_propeller	61	37	1.14272	Q8IWA0	WDR75	WD repeat-containing protein 75, U3 small nucleolar RNA-associated protein 17 homolog	-1.85164	-1.07616	0.878885	7.56632	1.0-10.0%		CL0186	Beta_propeller	38	37	1.14272	O95163	ELP1	Elongator complex protein 1, ELP1, IkappaB kinase complex-associated protein, IKK complex-associated protein, p150	-2.03625	-3.20052	-1.27649	0.052907	0.01-0.1%
CL0186	Beta_propeller	61	37	1.14272	Q9NV06	DCAF13	DDB1- and CUL4-associated factor 13, WD repeat and SOF domain-containing protein 1	-2.24899	-1.62473	0.723073	5.28534	1.0-10.0%		CL0186	Beta_propeller	38	37	1.14272	P55884	EIF3B	Eukaryotic translation initiation factor 3 subunit B, eIF3b, Eukaryotic translation initiation factor 3 subunit 9, Prt1 homolog, hPrt1, eIF-3-eta, eIF3 p110, eIF3 p116	-1.31779	-2.58367	-1.30544	0.0494945	0.01-0.1%
CL0186	Beta_propeller	61	37	1.14272	Q8TED0	UTP15	U3 small nucleolar RNA-associated protein 15 homolog	-1.9305	-1.31624	0.717945	5.2233	1.0-10.0%		CL0186	Beta_propeller	38	37	1.14272	Q6P2E9	EDC4	Enhancer of mRNA-decapping protein 4, Autoantigen Ge-1, Autoantigen RCD-8, Human enhancer of decapping large subunit, Hedls	-2.339	-3.66788	-1.37921	0.0417628	0.01-0.1%
CL0186	Beta_propeller	61	37	1.14272	Q9UII4	HERC5	E3 ISG15--protein ligase HERC5, 2.3.2.-, Cyclin-E-binding protein 1, HECT domain and RCC1-like domain-containing protein 5	-2.32102	-1.67668	0.594096	3.92732	1.0-10.0%		CL0186	Beta_propeller	38	37	1.14272	O15143	ARPC1B	Actin-related protein 2/3 complex subunit 1B, Arp2/3 complex 41 kDa subunit, p41-ARC	-1.70303	-2.9362	-1.44133	0.0361969	0.01-0.1%
CL0186	Beta_propeller	61	37	1.14272	Q15269	PWP2	Periodic tryptophan protein 2 homolog	-1.75117	-1.29466	0.534758	3.42577	1.0-10.0%		CL0186	Beta_propeller	38	37	1.14272	Q16531	DDB1	DNA damage-binding protein 1, DDB p127 subunit, DNA damage-binding protein a, DDBa, Damage-specific DNA-binding protein 1, HBV X-associated protein 1, XAP-1, UV-damaged DNA-binding factor, UV-damaged DNA-binding protein 1, UV-DDB 1, XPE-binding factor, XPE-BF, Xeroderma pigmentosum group E-complementing protein, XPCe	-1.25334	-2.78737	-1.58159	0.0262065	0.01-0.1%
CL0186	Beta_propeller	61	37	1.14272	Q9C0J8	WDR33	pre-mRNA 3' end processing protein WDR33, WD repeat-containing protein 33, WD repeat-containing protein of 146 kDa	-2.35194	-1.9054	0.484786	3.05342	1.0-10.0%		CL0214	UBA	39	6	0.986138	Q9H7E2	TDRD3	Tudor domain-containing protein 3	-3.36759	-2.79395	0.678115	4.76557	1.0-10.0%
CL0186	Beta_propeller	61	37	1.14272	Q96I51	RCC1L	RCC1-like G exchanging factor-like protein, RCC1-like, Williams-Beuren syndrome chromosomal region 16 protein	-2.58183	-2.2577	0.352573	2.25202	1.0-10.0%		CL0214	UBA	39	6	0.986138	Q9UBU9	NXF1	Nuclear RNA export factor 1, Tip-associated protein, Tip-associating protein, mRNA export factor TAP	-2.411	-2.57052	-0.0797494	0.832244	0.1-1.0%
CL0186	Beta_propeller	61	37	1.14272	Q9H2Y7	ZNF106	Zinc finger protein 106, Zfp-106, Zinc finger protein 474	-3.34128	-3.11546	0.343663	2.20629	1.0-10.0%		CL0214	UBA	39	6	0.986138	Q9Y450	HBS1L	HBS1-like protein, ERFS	-2.88631	-3.61273	-0.682085	0.207929	0.1-1.0%
CL0186	Beta_propeller	61	37	1.14272	Q9P2D0	IBTK	Inhibitor of Bruton tyrosine kinase, IBtk	-3.0107	-2.90489	0.164848	1.46167	1.0-10.0%		CL0214	UBA	39	6	0.986138	Q13501	SQSTM1	Sequestosome-1, EBI3-associated protein of 60 kDa, EBIAP, p60, Phosphotyrosine-independent ligand for the Lck SH2 domain of 62 kDa, Ubiquitin-binding protein p62	-1.83886	-2.93747	-1.24629	0.056717	0.01-0.1%
CL0186	Beta_propeller	61	37	1.14272	Q14137	BOP1	Ribosome biogenesis protein BOP1, Block of proliferation 1 protein	-1.86353	-2.07468	-0.128358	0.744119	0.1-1.0%		CL0214	UBA	39	6	0.986138	Q7KZI7	MARK2	Serine/threonine-protein kinase MARK2, 2.7.11.1, 2.7.11.26, ELKL motif kinase 1, EMK-1, MAP/microtubule affinity-regulating kinase 2, PAR1 homolog, PAR1 homolog b, Par-1b, Par1b	-2.4214	-3.8542	-1.40309	0.0395285	0.01-0.1%
CL0186	Beta_propeller	61	37	1.14272	Q15061	WDR43	WD repeat-containing protein 43, U3 small nucleolar RNA-associated protein 5 homolog	-1.83201	-2.04041	-0.137931	0.727896	0.1-1.0%		CL0214	UBA	39	6	0.986138	Q7Z6Z7	HUWE1	E3 ubiquitin-protein ligase HUWE1, 2.3.2.26, ARF-binding protein 1, ARF-BP1, HECT, UBA and WWE domain-containing protein 1, HECT-type E3 ubiquitin transferase HUWE1, Homologous to E6AP carboxyl terminus homologous protein 9, HectH9, Large structure of UREB1, LASU1, Mcl-1 ubiquitin ligase E3, Mule, Upstream regulatory element-binding protein 1, URE-B1, URE-binding protein 1	-1.72871	-2.8084	-1.82841	0.0148452	0.01-0.1%
CL0186	Beta_propeller	61	37	1.14272	Q9Y4P3	TBL2	Transducin beta-like protein 2, WS beta-transducin repeats protein, WS-betaTRP, Williams-Beuren syndrome chromosomal region 13 protein	-2.30952	-2.5357	-0.144533	0.716914	0.1-1.0%		CL0390	zf-FYVE-PHD	40	5	0.927572	Q92576	PHF3	PHD finger protein 3	-3.30676	-2.86446	0.545638	3.51267	1.0-10.0%
CL0186	Beta_propeller	61	37	1.14272	Q969X6	UTP4	U3 small nucleolar RNA-associated protein 4 homolog, Cirhin, UTP4 small subunit processome component	-1.90275	-2.11986	-0.160612	0.690857	0.1-1.0%		CL0390	zf-FYVE-PHD	40	5	0.927572	Q9BTC0	DIDO1	Death-inducer obliterator 1, DIO-1, hDido1, Death-associated transcription factor 1, DATF-1	-2.8011	-2.90061	-0.042872	0.906	0.1-1.0%
CL0186	Beta_propeller	61	37	1.14272	Q9UNX4	WDR3	WD repeat-containing protein 3	-2.03548	-2.30509	-0.194811	0.638542	0.1-1.0%		CL0390	zf-FYVE-PHD	40	5	0.927572	Q8IWS0	PHF6	PHD finger protein 6, PHD-like zinc finger protein	-2.1185	-3.1491	-1.05266	0.0885813	0.01-0.1%
CL0186	Beta_propeller	61	37	1.14272	Q8TBB5	KLHDC4	Kelch domain-containing protein 4	-2.85243	-2.94607	-0.280217	0.524545	0.1-1.0%		CL0390	zf-FYVE-PHD	40	5	0.927572	Q96T88	UHRF1	E3 ubiquitin-protein ligase UHRF1, 2.3.2.27, Inverted CCAAT box-binding protein of 90 kDa, Nuclear protein 95, Nuclear zinc finger protein Np95, HuNp95, hNp95, RING finger protein 106, RING-type E3 ubiquitin transferase UHRF1, Transcription factor ICBP90, Ubiquitin-like PHD and RING finger domain-containing protein 1, hUHRF1, Ubiquitin-like-containing PHD and RING finger domains protein 1	-2.00224	-3.2404	-1.16141	0.0689581	0.01-0.1%
CL0186	Beta_propeller	61	37	1.14272	Q8TEQ6	GEMIN5	Gem-associated protein 5, Gemin5	-1.6038	-1.89604	-0.294271	0.507842	0.1-1.0%		CL0390	zf-FYVE-PHD	40	5	0.927572	Q14839	CHD4	Chromodomain-helicase-DNA-binding protein 4, CHD-4, 3.6.4.12, ATP-dependent helicase CHD4, Mi-2 autoantigen 218 kDa protein, Mi2-beta	-1.58344	-2.48072	-1.21008	0.0616485	0.01-0.1%
CL0186	Beta_propeller	61	37	1.14272	Q07954	LRP1	Prolow-density lipoprotein receptor-related protein 1, LRP-1, Alpha-2-macroglobulin receptor, A2MR, Apolipoprotein E receptor, APOER, CD91	-3.84553	-3.64325	-0.308978	0.490933	0.1-1.0%		CL0458	IIaaRS-ABD	41	8	0.903455	Q9NQ55	PPAN	Suppressor of SWI4 1 homolog, Ssf-1, Brix domain-containing protein 3, Peter Pan homolog	-1.76313	-1.40022	0.429764	2.69007	1.0-10.0%
CL0186	Beta_propeller	61	37	1.14272	Q9HC35	EML4	Echinoderm microtubule-associated protein-like 4, EMAP-4, Restrictedly overexpressed proliferation-associated protein, Ropp 120	-1.939	-2.38779	-0.368658	0.427899	0.1-1.0%		CL0458	IIaaRS-ABD	41	8	0.903455	Q9H7B2	RPF2	Ribosome production factor 2 homolog, Brix domain-containing protein 1, Ribosome biogenesis protein RPF2 homolog	-1.73334	-1.6384	0.185916	1.53432	1.0-10.0%
CL0186	Beta_propeller	61	37	1.14272	Q9BY44	EIF2A	Eukaryotic translation initiation factor 2A, eIF-2A, 65 kDa eukaryotic translation initiation factor 2A	-1.58718	-2.05098	-0.421933	0.378501	0.1-1.0%		CL0458	IIaaRS-ABD	41	8	0.903455	Q9H9Y2	RPF1	Ribosome production factor 1, Brix domain-containing protein 5, Ribosome biogenesis protein RPF1	-2.45713	-2.39254	0.1249	1.33322	1.0-10.0%
CL0186	Beta_propeller	61	37	1.14272	P53621	COPA	Coatomer subunit alpha, Alpha-coat protein, Alpha-COP, HEP-COP, HEPCOP	-1.16622	-1.1529	-0.522823	0.300038	0.1-1.0%		CL0458	IIaaRS-ABD	41	8	0.903455	Q8TDN6	BRIX1	Ribosome biogenesis protein BRX1 homolog, Brix domain-containing protein 2	-1.23531	-1.44229	-0.111102	0.77428	0.1-1.0%
CL0186	Beta_propeller	61	37	1.14272	P63244	RACK1	Receptor of activated protein C kinase 1, Cell proliferation-inducing gene 21 protein, Guanine nucleotide-binding protein subunit beta-2-like 1, Guanine nucleotide-binding protein subunit beta-like protein 12.3, Human lung cancer oncogene 7 protein, HLC-7, Receptor for activated C kinase, Small ribosomal subunit protein RACK1	-0.762486	-1.4639	-0.626988	0.236054	0.1-1.0%		CL0458	IIaaRS-ABD	41	8	0.903455	Q96G21	IMP4	U3 small nucleolar ribonucleoprotein protein IMP4, U3 snoRNP protein IMP4, Brix domain-containing protein 4	-2.45199	-2.61653	-0.136005	0.73113	0.1-1.0%
CL0186	Beta_propeller	61	37	1.14272	Q12769	NUP160	Nuclear pore complex protein Nup160, 160 kDa nucleoporin, Nucleoporin Nup160	-2.08003	-2.80811	-0.702674	0.198301	0.1-1.0%		CL0458	IIaaRS-ABD	41	8	0.903455	P07814	EPRS1	Bifunctional glutamate/proline--tRNA ligase, Bifunctional aminoacyl-tRNA synthetase, Cell proliferation-inducing gene 32 protein, Glutamatyl-prolyl-tRNA synthetase, Glutamate--tRNA ligase, 6.1.1.17, Glutamyl-tRNA synthetase, GluRS, Proline--tRNA ligase, 6.1.1.15, Prolyl-tRNA synthetase	-0.957657	-1.84242	-0.969262	0.107334	0.1-1.0%
CL0186	Beta_propeller	61	37	1.14272	Q05048	CSTF1	Cleavage stimulation factor subunit 1, CF-1 50 kDa subunit, Cleavage stimulation factor 50 kDa subunit, CSTF 50 kDa subunit, CstF-50	-2.18113	-2.46628	-0.726759	0.187603	0.1-1.0%		CL0458	IIaaRS-ABD	41	8	0.903455	P26639	TARS1	Threonine--tRNA ligase 1, cytoplasmic, 6.1.1.3, Threonyl-tRNA synthetase, ThrRS, Threonyl-tRNA synthetase 1	-0.829107	-2.24175	-1.40932	0.0389659	0.01-0.1%
CL0186	Beta_propeller	61	37	1.14272	O43818	RRP9	U3 small nucleolar RNA-interacting protein 2, RRP9 homolog, U3 small nucleolar ribonucleoprotein-associated 55 kDa protein, U3 snoRNP-associated 55 kDa protein, U3-55K	-2.00918	-2.94348	-0.860598	0.137848	0.1-1.0%		CL0458	IIaaRS-ABD	41	8	0.903455	P41250	GARS1	Glycine--tRNA ligase, 6.1.1.14, Diadenosine tetraphosphate synthetase, Ap4A synthetase, 2.7.7.-, Glycyl-tRNA synthetase, GlyRS, Glycyl-tRNA synthetase 1	-1.34537	-2.79976	-1.73703	0.0183218	0.01-0.1%
CL0186	Beta_propeller	61	37	1.14272	Q9NWT1	PAK1IP1	p21-activated protein kinase-interacting protein 1, PAK/PLC-interacting protein 1, hPIP1, PAK1-interacting protein 1, WD repeat-containing protein 84	-2.02887	-3.06079	-0.930328	0.117401	0.1-1.0%		CL0063	NADP_Rossmann	42	35	0.877333	Q96P11	NSUN5	28S rRNA (cytosine-C(5))-methyltransferase, 2.1.1.-, NOL1-related protein, NOL1R, NOL1/NOP2/Sun domain family member 5, Williams-Beuren syndrome chromosomal region 20A protein	-2.32056	-1.55358	0.845428	7.00531	1.0-10.0%
CL0186	Beta_propeller	61	37	1.14272	Q9P258	RCC2	Protein RCC2, RCC1-like protein TD-60, Telophase disk protein of 60 kDa	-1.37614	-2.36751	-0.937542	0.115467	0.1-1.0%		CL0063	NADP_Rossmann	42	35	0.877333	Q86W50	METTL16	RNA N6-adenosine-methyltransferase METTL16, Methyltransferase 10 domain-containing protein, Methyltransferase-like protein 16, N6-adenosine-methyltransferase METTL16, 2.1.1.348, U6 small nuclear RNA (adenine-(43)-N(6))-methyltransferase, 2.1.1.346	-2.67482	-2.0447	0.745594	5.56665	1.0-10.0%
CL0186	Beta_propeller	61	37	1.14272	Q6RFH5	WDR74	WD repeat-containing protein 74, NOP seven-associated protein 1	-2.58698	-3.44225	-0.959398	0.1098	0.1-1.0%		CL0063	NADP_Rossmann	42	35	0.877333	O43159	RRP8	Ribosomal RNA-processing protein 8, 2.1.1.-, Cerebral protein 1, Nucleomethylin	-2.21828	-1.77664	0.523818	3.34055	1.0-10.0%
CL0186	Beta_propeller	61	37	1.14272	Q9Y3F4	STRAP	Serine-threonine kinase receptor-associated protein, MAP activator with WD repeats, UNR-interacting protein, WD-40 repeat protein PT-WD	-1.40855	-2.39823	-0.96537	0.1083	0.1-1.0%		CL0063	NADP_Rossmann	42	35	0.877333	Q7L2J0	MEPCE	7SK snRNA methylphosphate capping enzyme, MePCE, 2.1.1.-, Bicoid-interacting protein 3 homolog, Bin3 homolog	-2.20974	-1.76925	0.363424	2.309	1.0-10.0%
CL0186	Beta_propeller	61	37	1.14272	Q12788	TBL3	Transducin beta-like protein 3, WD repeat-containing protein SAZD	-1.91641	-2.78308	-1.01331	0.0969827	0.01-0.1%		CL0063	NADP_Rossmann	42	35	0.877333	P22087	FBL	rRNA 2'-O-methyltransferase fibrillarin, 2.1.1.-, 34 kDa nucleolar scleroderma antigen, Histone-glutamine methyltransferase, U6 snRNA 2'-O-methyltransferase fibrillarin	-1.2795	-0.999005	0.355868	2.26918	1.0-10.0%
CL0186	Beta_propeller	61	37	1.14272	Q8NI36	WDR36	WD repeat-containing protein 36, T-cell activation WD repeat-containing protein, TA-WDRP	-1.94475	-2.65483	-1.03695	0.0918428	0.01-0.1%		CL0063	NADP_Rossmann	42	35	0.877333	Q8IY81	FTSJ3	pre-rRNA 2'-O-ribose RNA methyltransferase FTSJ3, 2.1.1.-, Protein ftsJ homolog 3, Putative rRNA methyltransferase 3	-1.65371	-1.53459	0.156079	1.43245	1.0-10.0%
CL0186	Beta_propeller	61	37	1.14272	Q9NNW5	WDR6	WD repeat-containing protein 6	-2.81242	-3.82645	-1.16102	0.0690211	0.01-0.1%		CL0063	NADP_Rossmann	42	35	0.877333	Q8IZ69	TRMT2A	tRNA (uracil-5-)-methyltransferase homolog A, 2.1.1.35, mRNA (uracil-5-)-methyltransferase TRMT2A, 2.1.1.-	-2.7584	-1.9748	0.0475074	1.1156	1.0-10.0%
CL0186	Beta_propeller	61	37	1.14272	P35606	COPB2	Coatomer subunit beta', Beta'-coat protein, Beta'-COP, p102	-1.49448	-2.52734	-1.2539	0.0557308	0.01-0.1%		CL0063	NADP_Rossmann	42	35	0.877333	Q9NXH9	TRMT1	tRNA (guanine(26)-N(2))-dimethyltransferase, 2.1.1.216, tRNA 2,2-dimethylguanosine-26 methyltransferase, tRNA(guanine-26,N(2)-N(2)) methyltransferase, tRNA(m(2,2)G26)dimethyltransferase	-2.10498	-2.13157	0.0446353	1.10824	1.0-10.0%
CL0186	Beta_propeller	61	37	1.14272	O95163	ELP1	Elongator complex protein 1, ELP1, IkappaB kinase complex-associated protein, IKK complex-associated protein, p150	-2.03625	-3.20052	-1.27649	0.052907	0.01-0.1%		CL0063	NADP_Rossmann	42	35	0.877333	Q7Z2T5	TRMT1L	TRMT1-like protein, 2.1.1.-	-2.95475	-2.5155	-0.0209882	0.952822	0.1-1.0%
CL0186	Beta_propeller	61	37	1.14272	P55884	EIF3B	Eukaryotic translation initiation factor 3 subunit B, eIF3b, Eukaryotic translation initiation factor 3 subunit 9, Prt1 homolog, hPrt1, eIF-3-eta, eIF3 p110, eIF3 p116	-1.31779	-2.58367	-1.30544	0.0494945	0.01-0.1%		CL0063	NADP_Rossmann	42	35	0.877333	P46087	NOP2	Probable 28S rRNA (cytosine(4447)-C(5))-methyltransferase, 2.1.1.-, Nucleolar protein 1, Nucleolar protein 2 homolog, Proliferating-cell nucleolar antigen p120, Proliferation-associated nucleolar protein p120	-1.24419	-1.34228	-0.0259998	0.94189	0.1-1.0%
CL0186	Beta_propeller	61	37	1.14272	Q6P2E9	EDC4	Enhancer of mRNA-decapping protein 4, Autoantigen Ge-1, Autoantigen RCD-8, Human enhancer of decapping large subunit, Hedls	-2.339	-3.66788	-1.37921	0.0417628	0.01-0.1%		CL0063	NADP_Rossmann	42	35	0.877333	O43148	RNMT	mRNA cap guanine-N7 methyltransferase, 2.1.1.56, RG7MT1, mRNA (guanine-N(7))-methyltransferase, mRNA cap methyltransferase, hCMT1, hMet, hcm1p	-2.70613	-2.89846	-0.0948973	0.803716	0.1-1.0%
CL0186	Beta_propeller	61	37	1.14272	O15143	ARPC1B	Actin-related protein 2/3 complex subunit 1B, Arp2/3 complex 41 kDa subunit, p41-ARC	-1.70303	-2.9362	-1.44133	0.0361969	0.01-0.1%		CL0063	NADP_Rossmann	42	35	0.877333	Q9H5Q4	TFB2M	Dimethyladenosine transferase 2, mitochondrial, 2.1.1.-, Hepatitis C virus NS5A-transactivated protein 5, HCV NS5A-transactivated protein 5, Mitochondrial 12S rRNA dimethylase 2, Mitochondrial transcription factor B2, h-mtTFB, h-mtTFB2, hTFB2M, mtTFB2, S-adenosylmethionine-6-N', N'-adenosyl(rRNA) dimethyltransferase 2	-2.65907	-2.75333	-0.137767	0.72817	0.1-1.0%
CL0186	Beta_propeller	61	37	1.14272	Q16531	DDB1	DNA damage-binding protein 1, DDB p127 subunit, DNA damage-binding protein a, DDBa, Damage-specific DNA-binding protein 1, HBV X-associated protein 1, XAP-1, UV-damaged DNA-binding factor, UV-damaged DNA-binding protein 1, UV-DDB 1, XPE-binding factor, XPE-BF, Xeroderma pigmentosum group E-complementing protein, XPCe	-1.25334	-2.78737	-1.58159	0.0262065	0.01-0.1%		CL0063	NADP_Rossmann	42	35	0.877333	Q08J23	NSUN2	RNA cytosine C(5)-methyltransferase NSUN2, 2.1.1.-, Myc-induced SUN domain-containing protein, Misu, NOL1/NOP2/Sun domain family member 2, Substrate of AIM1/Aurora kinase B, mRNA cytosine C(5)-methyltransferase, tRNA cytosine C(5)-methyltransferase, 2.1.1.203, tRNA methyltransferase 4 homolog, hTrm4	-1.16308	-1.1091	-0.144632	0.71675	0.1-1.0%
CL0093	Peptidase_CD	62	1	1.09178	Q14674	ESPL1	Separin, 3.4.22.49, Caspase-like protein ESPL1, Extra spindle poles-like 1 protein, Separase	-3.59907	-3.5559	0.0381335	1.09178	1.0-10.0%		CL0063	NADP_Rossmann	42	35	0.877333	Q96CB9	NSUN4	5-methylcytosine rRNA methyltransferase NSUN4, 2.1.1.-, 5-methylcytosine tRNA methyltransferase NSUN4, NOL1/NOP2/Sun domain family member 4	-3.32834	-3.49827	-0.200983	0.62953	0.1-1.0%
CL0126	Peptidase_MA	63	1	1.06527	Q9Y4W6	AFG3L2	AFG3-like protein 2, 3.4.24.-, Paraplegin-like protein	-2.10194	-2.04808	0.0274583	1.06527	1.0-10.0%		CL0063	NADP_Rossmann	42	35	0.877333	Q9UNQ2	DIMT1	Probable dimethyladenosine transferase, 2.1.1.183, DIM1 dimethyladenosine transferase 1 homolog, DIM1 dimethyladenosine transferase 1-like, Probable 18S rRNA (adenine(1779)-N(6)/adenine(1780)-N(6))-dimethyltransferase, Probable 18S rRNA dimethylase, Probable S-adenosylmethionine-6-N',N'-adenosyl(rRNA) dimethyltransferase	-2.21887	-2.52719	-0.206284	0.621894	0.1-1.0%
CL0303	H2TH	64	2	1.01008	O60524	NEMF	Ribosome quality control complex subunit NEMF, Antigen NY-CO-1, Nuclear export mediator factor, Serologically defined colon cancer antigen 1	-2.51038	-2.31243	0.214855	1.64004	1.0-10.0%		CL0063	NADP_Rossmann	42	35	0.877333	Q8WVM0	TFB1M	Dimethyladenosine transferase 1, mitochondrial, 2.1.1.-, Mitochondrial 12S rRNA dimethylase 1, Mitochondrial transcription factor B1, h-mtTFB, h-mtTFB1, hTFB1M, mtTFB1, S-adenosylmethionine-6-N', N'-adenosyl(rRNA) dimethyltransferase 1	-3.51531	-3.19415	-0.237267	0.579072	0.1-1.0%
CL0303	H2TH	64	2	1.01008	P62269	RPS18	40S ribosomal protein S18, Ke-3, Ke3, Small ribosomal subunit protein uS13	-0.694763	-1.21412	-0.420079	0.38012	0.1-1.0%		CL0063	NADP_Rossmann	42	35	0.877333	O43865	AHCYL1	S-adenosylhomocysteine hydrolase-like protein 1, DC-expressed AHCY-like molecule, IP(3)Rs binding protein released with IP(3), IRBIT, Putative adenosylhomocysteinase 2, S-adenosyl-L-homocysteine hydrolase 2, AdoHcyase 2	-0.128598	-1.00666	-0.748447	0.178465	0.1-1.0%
CL0214	UBA	65	6	0.986138	Q9H7E2	TDRD3	Tudor domain-containing protein 3	-3.36759	-2.79395	0.678115	4.76557	1.0-10.0%		CL0063	NADP_Rossmann	42	35	0.877333	P26358	DNMT1	DNA (cytosine-5)-methyltransferase 1, Dnmt1, 2.1.1.37, CXXC-type zinc finger protein 9, DNA methyltransferase HsaI, DNA MTase HsaI, M.HsaI, MCMT	-1.70874	-2.94308	-1.20088	0.0629685	0.01-0.1%
CL0214	UBA	65	6	0.986138	Q9UBU9	NXF1	Nuclear RNA export factor 1, Tip-associated protein, Tip-associating protein, mRNA export factor TAP	-2.411	-2.57052	-0.0797494	0.832244	0.1-1.0%		CL0063	NADP_Rossmann	42	35	0.877333	A0AVT1	UBA6	Ubiquitin-like modifier-activating enzyme 6, Ubiquitin-activating enzyme 6, 6.2.1.45, Monocyte protein 4, MOP-4, Ubiquitin-activating enzyme E1-like protein 2, E1-L2	-2.47884	-3.3643	-1.2103	0.0616164	0.01-0.1%
CL0214	UBA	65	6	0.986138	Q9Y450	HBS1L	HBS1-like protein, ERFS	-2.88631	-3.61273	-0.682085	0.207929	0.1-1.0%		CL0063	NADP_Rossmann	42	35	0.877333	P00367	GLUD1	Glutamate dehydrogenase 1, mitochondrial, GDH 1, 1.4.1.3	-1.45848	-2.78172	-1.40124	0.0396969	0.01-0.1%
CL0214	UBA	65	6	0.986138	Q13501	SQSTM1	Sequestosome-1, EBI3-associated protein of 60 kDa, EBIAP, p60, Phosphotyrosine-independent ligand for the Lck SH2 domain of 62 kDa, Ubiquitin-binding protein p62	-1.83886	-2.93747	-1.24629	0.056717	0.01-0.1%		CL0063	NADP_Rossmann	42	35	0.877333	A0A0U1RQF0	FASN	Fatty acid synthase, 1.1.1.100, 1.3.1.39, 2.3.1.38, 2.3.1.39, 2.3.1.41, 2.3.1.85, 3.1.2.14, 4.2.1.59	-0.47073	-1.45308	-1.40476	0.0393763	0.01-0.1%
CL0214	UBA	65	6	0.986138	Q7KZI7	MARK2	Serine/threonine-protein kinase MARK2, 2.7.11.1, 2.7.11.26, ELKL motif kinase 1, EMK-1, MAP/microtubule affinity-regulating kinase 2, PAR1 homolog, PAR1 homolog b, Par-1b, Par1b	-2.4214	-3.8542	-1.40309	0.0395285	0.01-0.1%		CL0063	NADP_Rossmann	42	35	0.877333	Q99714	HSD17B10	3-hydroxyacyl-CoA dehydrogenase type-2, 1.1.1.35, 17-beta-estradiol 17-dehydrogenase, 1.1.1.62, 2-methyl-3-hydroxybutyryl-CoA dehydrogenase, MHBD, 3-alpha-(17-beta)-hydroxysteroid dehydrogenase (NAD(+)), 1.1.1.239, 3-hydroxy-2-methylbutyryl-CoA dehydrogenase, 1.1.1.178, 3-hydroxyacyl-CoA dehydrogenase type II, 3alpha(or 20beta)-hydroxysteroid dehydrogenase, 1.1.1.53, 7-alpha-hydroxysteroid dehydr…	-1.42538	-2.72874	-1.48865	0.03246	0.01-0.1%
CL0214	UBA	65	6	0.986138	Q7Z6Z7	HUWE1	E3 ubiquitin-protein ligase HUWE1, 2.3.2.26, ARF-binding protein 1, ARF-BP1, HECT, UBA and WWE domain-containing protein 1, HECT-type E3 ubiquitin transferase HUWE1, Homologous to E6AP carboxyl terminus homologous protein 9, HectH9, Large structure of UREB1, LASU1, Mcl-1 ubiquitin ligase E3, Mule, Upstream regulatory element-binding protein 1, URE-B1, URE-binding protein 1	-1.72871	-2.8084	-1.82841	0.0148452	0.01-0.1%		CL0063	NADP_Rossmann	42	35	0.877333	P31040	SDHA	Succinate dehydrogenase [ubiquinone] flavoprotein subunit, mitochondrial, 1.3.5.1, Flavoprotein subunit of complex II, Fp	-1.67354	-3.06906	-1.53413	0.0292328	0.01-0.1%
CL0410	LEF-8-like	66	1	0.982791	P30876	POLR2B	DNA-directed RNA polymerase II subunit RPB2, 2.7.7.6, DNA-directed RNA polymerase II 140 kDa polypeptide, DNA-directed RNA polymerase II subunit B, RNA polymerase II subunit 2, RNA polymerase II subunit B2	-1.82801	-1.8378	-0.00753899	0.982791	0.1-1.0%		CL0063	NADP_Rossmann	42	35	0.877333	Q6UB35	MTHFD1L	Monofunctional C1-tetrahydrofolate synthase, mitochondrial, 6.3.4.3, Formyltetrahydrofolate synthetase	-2.00634	-3.41703	-1.57338	0.0267066	0.01-0.1%
CL0439	NusG-like	67	1	0.973508	O00267	SUPT5H	Transcription elongation factor SPT5, hSPT5, DRB sensitivity-inducing factor 160 kDa subunit, DSIF p160, DRB sensitivity-inducing factor large subunit, DSIF large subunit, Tat-cotransactivator 1 protein, Tat-CT1 protein	-1.85789	-1.89278	-0.0116605	0.973508	0.1-1.0%		CL0063	NADP_Rossmann	42	35	0.877333	P50395	GDI2	Rab GDP dissociation inhibitor beta, Rab GDI beta, Guanosine diphosphate dissociation inhibitor 2, GDI-2	-0.901538	-2.32821	-1.61544	0.0242416	0.01-0.1%
CL0323	Patatin	68	2	0.945896	Q8IVS2	MCAT	Malonyl-CoA-acyl carrier protein transacylase, mitochondrial, MCT, 2.3.1.39, Mitochondrial malonyl CoA:ACP acyltransferase, Mitochondrial malonyltransferase, [Acyl-carrier-protein] malonyltransferase	-2.89621	-2.65438	0.267739	1.85242	1.0-10.0%		CL0063	NADP_Rossmann	42	35	0.877333	P51659	HSD17B4	Peroxisomal multifunctional enzyme type 2, MFE-2, 17-beta-hydroxysteroid dehydrogenase 4, 17-beta-HSD 4, D-bifunctional protein, DBP, Multifunctional protein 2, MFP-2, Short chain dehydrogenase/reductase family 8C member 1	-1.56952	-2.66176	-1.6981	0.02004	0.01-0.1%
CL0323	Patatin	68	2	0.945896	A0A0U1RQF0	FASN	Fatty acid synthase, 1.1.1.100, 1.3.1.39, 2.3.1.38, 2.3.1.39, 2.3.1.41, 2.3.1.85, 3.1.2.14, 4.2.1.59	-0.47073	-1.45308	-1.40476	0.0393763	0.01-0.1%		CL0063	NADP_Rossmann	42	35	0.877333	P40939	HADHA	Trifunctional enzyme subunit alpha, mitochondrial, 78 kDa gastrin-binding protein, Monolysocardiolipin acyltransferase, 2.3.1.-, TP-alpha, Long-chain enoyl-CoA hydratase, 4.2.1.17, Long chain 3-hydroxyacyl-CoA dehydrogenase, 1.1.1.211	-1.55456	-3.06881	-1.72285	0.0189299	0.01-0.1%
CL0290	EPT_RTPC	69	1	0.941781	O00442	RTCA	RNA 3'-terminal phosphate cyclase, RNA cyclase, RNA-3'-phosphate cyclase, 6.5.1.4, RNA terminal phosphate cyclase domain-containing protein 1, RTC domain-containing protein 1	-2.13448	-2.20856	-0.0260499	0.941781	0.1-1.0%		CL0063	NADP_Rossmann	42	35	0.877333	P11413	G6PD	Glucose-6-phosphate 1-dehydrogenase, G6PD, 1.1.1.49	-1.2635	-2.94445	-1.98135	0.0104388	0.01-0.1%
CL0390	zf-FYVE-PHD	70	5	0.927572	Q92576	PHF3	PHD finger protein 3	-3.30676	-2.86446	0.545638	3.51267	1.0-10.0%		CL0063	NADP_Rossmann	42	35	0.877333	P35520	CBS	Cystathionine beta-synthase, 4.2.1.22, Beta-thionase, Serine sulfhydrase	-1.97477	-3.74406	-1.98275	0.0104052	0.01-0.1%
CL0390	zf-FYVE-PHD	70	5	0.927572	Q9BTC0	DIDO1	Death-inducer obliterator 1, DIO-1, hDido1, Death-associated transcription factor 1, DATF-1	-2.8011	-2.90061	-0.042872	0.906	0.1-1.0%		CL0063	NADP_Rossmann	42	35	0.877333	P11586	MTHFD1	C-1-tetrahydrofolate synthase, cytoplasmic, C1-THF synthase, Epididymis secretory sperm binding protein, Methylenetetrahydrofolate dehydrogenase, 1.5.1.5, Methenyltetrahydrofolate cyclohydrolase, 3.5.4.9, Formyltetrahydrofolate synthetase, 6.3.4.3	-1.3351	-3.05981	-2.09352	0.00806276	<0.01%
CL0390	zf-FYVE-PHD	70	5	0.927572	Q8IWS0	PHF6	PHD finger protein 6, PHD-like zinc finger protein	-2.1185	-3.1491	-1.05266	0.0885813	0.01-0.1%		CL0063	NADP_Rossmann	42	35	0.877333	P07195	LDHB	L-lactate dehydrogenase B chain, LDH-B, 1.1.1.27, LDH heart subunit, LDH-H, Renal carcinoma antigen NY-REN-46	-0.206174	-2.06358	-2.12228	0.00754612	<0.01%
CL0390	zf-FYVE-PHD	70	5	0.927572	Q96T88	UHRF1	E3 ubiquitin-protein ligase UHRF1, 2.3.2.27, Inverted CCAAT box-binding protein of 90 kDa, Nuclear protein 95, Nuclear zinc finger protein Np95, HuNp95, hNp95, RING finger protein 106, RING-type E3 ubiquitin transferase UHRF1, Transcription factor ICBP90, Ubiquitin-like PHD and RING finger domain-containing protein 1, hUHRF1, Ubiquitin-like-containing PHD and RING finger domains protein 1	-2.00224	-3.2404	-1.16141	0.0689581	0.01-0.1%		CL0063	NADP_Rossmann	42	35	0.877333	P53396	ACLY	ATP-citrate synthase, 2.3.3.8, ATP-citrate (pro-S-)-lyase, ACL, Citrate cleavage enzyme	-0.85111	-2.63479	-2.30954	0.00490297	<0.01%
CL0390	zf-FYVE-PHD	70	5	0.927572	Q14839	CHD4	Chromodomain-helicase-DNA-binding protein 4, CHD-4, 3.6.4.12, ATP-dependent helicase CHD4, Mi-2 autoantigen 218 kDa protein, Mi2-beta	-1.58344	-2.48072	-1.21008	0.0616485	0.01-0.1%		CL0063	NADP_Rossmann	42	35	0.877333	O43175	PHGDH	D-3-phosphoglycerate dehydrogenase, 3-PGDH, 1.1.1.95, 2-oxoglutarate reductase, 1.1.1.399, Malate dehydrogenase, 1.1.1.37	-0.684517	-2.517	-2.34179	0.00455206	<0.01%
CL0458	IIaaRS-ABD	71	8	0.903455	Q9NQ55	PPAN	Suppressor of SWI4 1 homolog, Ssf-1, Brix domain-containing protein 3, Peter Pan homolog	-1.76313	-1.40022	0.429764	2.69007	1.0-10.0%		CL0063	NADP_Rossmann	42	35	0.877333	Q99536	VAT1	Synaptic vesicle membrane protein VAT-1 homolog, 1.-.-.-	-1.93601	-3.64299	-2.3438	0.00453108	<0.01%
CL0458	IIaaRS-ABD	71	8	0.903455	Q9H7B2	RPF2	Ribosome production factor 2 homolog, Brix domain-containing protein 1, Ribosome biogenesis protein RPF2 homolog	-1.73334	-1.6384	0.185916	1.53432	1.0-10.0%		CL0063	NADP_Rossmann	42	35	0.877333	P04406	GAPDH	Glyceraldehyde-3-phosphate dehydrogenase, GAPDH, 1.2.1.12, Peptidyl-cysteine S-nitrosylase GAPDH, 2.6.99.-	0.349412	-1.55173	-2.7784	0.0016657	<0.01%
CL0458	IIaaRS-ABD	71	8	0.903455	Q9H9Y2	RPF1	Ribosome production factor 1, Brix domain-containing protein 5, Ribosome biogenesis protein RPF1	-2.45713	-2.39254	0.1249	1.33322	1.0-10.0%		CL0098	SPOUT	43	4	0.859013	Q9HC36	MRM3	rRNA methyltransferase 3, mitochondrial, 2.1.1.-, 16S rRNA (guanosine(1370)-2'-O)-methyltransferase, 16S rRNA [Gm1370] 2'-O-methyltransferase, RNA methyltransferase-like protein 1	-2.42484	-2.40149	0.120087	1.31852	1.0-10.0%
CL0458	IIaaRS-ABD	71	8	0.903455	Q8TDN6	BRIX1	Ribosome biogenesis protein BRX1 homolog, Brix domain-containing protein 2	-1.23531	-1.44229	-0.111102	0.77428	0.1-1.0%		CL0098	SPOUT	43	4	0.859013	Q6IN84	MRM1	rRNA methyltransferase 1, mitochondrial, 2.1.1.-, 16S rRNA (guanosine(1145)-2'-O)-methyltransferase, 16S rRNA [Gm1145] 2'-O-methyltransferase	-3.15975	-3.08516	0.117545	1.31083	1.0-10.0%
CL0458	IIaaRS-ABD	71	8	0.903455	Q96G21	IMP4	U3 small nucleolar ribonucleoprotein protein IMP4, U3 snoRNP protein IMP4, Brix domain-containing protein 4	-2.45199	-2.61653	-0.136005	0.73113	0.1-1.0%		CL0098	SPOUT	43	4	0.859013	Q7L0Y3	TRMT10C	tRNA methyltransferase 10 homolog C, HBV pre-S2 trans-regulated protein 2, Mitochondrial ribonuclease P protein 1, Mitochondrial RNase P protein 1, RNA (guanine-9-)-methyltransferase domain-containing protein 1, Renal carcinoma antigen NY-REN-49, mRNA methyladenosine-N(1)-methyltransferase, 2.1.1.-, tRNA (adenine(9)-N(1))-methyltransferase, 2.1.1.218, tRNA (guanine(9)-N(1))-methyltransferase, 2.1…	-1.86086	-1.93607	-0.22727	0.592556	0.1-1.0%
CL0458	IIaaRS-ABD	71	8	0.903455	P07814	EPRS1	Bifunctional glutamate/proline--tRNA ligase, Bifunctional aminoacyl-tRNA synthetase, Cell proliferation-inducing gene 32 protein, Glutamatyl-prolyl-tRNA synthetase, Glutamate--tRNA ligase, 6.1.1.17, Glutamyl-tRNA synthetase, GluRS, Proline--tRNA ligase, 6.1.1.15, Prolyl-tRNA synthetase	-0.957657	-1.84242	-0.969262	0.107334	0.1-1.0%		CL0098	SPOUT	43	4	0.859013	Q92979	EMG1	Ribosomal RNA small subunit methyltransferase NEP1, 2.1.1.-, 18S rRNA (pseudouridine(1248)-N1)-methyltransferase, 18S rRNA Psi1248 methyltransferase, Nucleolar protein EMG1 homolog, Protein C2f, Ribosome biogenesis protein NEP1	-1.71808	-2.47354	-0.669283	0.21415	0.1-1.0%
CL0458	IIaaRS-ABD	71	8	0.903455	P26639	TARS1	Threonine--tRNA ligase 1, cytoplasmic, 6.1.1.3, Threonyl-tRNA synthetase, ThrRS, Threonyl-tRNA synthetase 1	-0.829107	-2.24175	-1.40932	0.0389659	0.01-0.1%		CL0475	Cyclophil-like	44	5	0.787062	Q8WUA2	PPIL4	Peptidyl-prolyl cis-trans isomerase-like 4, PPIase, 5.2.1.8, Cyclophilin-like protein PPIL4, Rotamase PPIL4	-3.06517	-2.491	0.421802	2.6412	1.0-10.0%
CL0458	IIaaRS-ABD	71	8	0.903455	P41250	GARS1	Glycine--tRNA ligase, 6.1.1.14, Diadenosine tetraphosphate synthetase, Ap4A synthetase, 2.7.7.-, Glycyl-tRNA synthetase, GlyRS, Glycyl-tRNA synthetase 1	-1.34537	-2.79976	-1.73703	0.0183218	0.01-0.1%		CL0475	Cyclophil-like	44	5	0.787062	Q13427	PPIG	Peptidyl-prolyl cis-trans isomerase G, PPIase G, Peptidyl-prolyl isomerase G, 5.2.1.8, CASP10, Clk-associating RS-cyclophilin, CARS-Cyp, CARS-cyclophilin, SR-cyclophilin, SR-cyp, SRcyp, Cyclophilin G, Rotamase G	-2.79421	-2.68423	0.0585618	1.14436	1.0-10.0%
CL0063	NADP_Rossmann	72	35	0.877333	Q96P11	NSUN5	28S rRNA (cytosine-C(5))-methyltransferase, 2.1.1.-, NOL1-related protein, NOL1R, NOL1/NOP2/Sun domain family member 5, Williams-Beuren syndrome chromosomal region 20A protein	-2.32056	-1.55358	0.845428	7.00531	1.0-10.0%		CL0475	Cyclophil-like	44	5	0.787062	P49792	RANBP2	E3 SUMO-protein ligase RanBP2, 2.3.2.-, 358 kDa nucleoporin, Nuclear pore complex protein Nup358, Nucleoporin Nup358, Ran-binding protein 2, RanBP2, p270	-1.4217	-2.30098	-0.905955	0.124178	0.1-1.0%
CL0063	NADP_Rossmann	72	35	0.877333	Q86W50	METTL16	RNA N6-adenosine-methyltransferase METTL16, Methyltransferase 10 domain-containing protein, Methyltransferase-like protein 16, N6-adenosine-methyltransferase METTL16, 2.1.1.348, U6 small nuclear RNA (adenine-(43)-N(6))-methyltransferase, 2.1.1.346	-2.67482	-2.0447	0.745594	5.56665	1.0-10.0%		CL0475	Cyclophil-like	44	5	0.787062	P62937	PPIA	Peptidyl-prolyl cis-trans isomerase A, PPIase A, 5.2.1.8, Cyclophilin A, Cyclosporin A-binding protein, Rotamase A	0.073448	-1.63986	-1.76342	0.0172416	0.01-0.1%
CL0063	NADP_Rossmann	72	35	0.877333	O43159	RRP8	Ribosomal RNA-processing protein 8, 2.1.1.-, Cerebral protein 1, Nucleomethylin	-2.21828	-1.77664	0.523818	3.34055	1.0-10.0%		CL0475	Cyclophil-like	44	5	0.787062	P23284	PPIB	Peptidyl-prolyl cis-trans isomerase B, PPIase B, 5.2.1.8, CYP-S1, Cyclophilin B, Rotamase B, S-cyclophilin, SCYLP	-0.535106	-2.58957	-2.07927	0.00833156	<0.01%
CL0063	NADP_Rossmann	72	35	0.877333	Q7L2J0	MEPCE	7SK snRNA methylphosphate capping enzyme, MePCE, 2.1.1.-, Bicoid-interacting protein 3 homolog, Bin3 homolog	-2.20974	-1.76925	0.363424	2.309	1.0-10.0%		CL0588	Ribos_L15p_L18e	45	3	0.692303	Q9P015	MRPL15	39S ribosomal protein L15, mitochondrial, L15mt, MRP-L15, Mitochondrial large ribosomal subunit protein uL15m	-2.26766	-2.17133	0.15775	1.43797	1.0-10.0%
CL0063	NADP_Rossmann	72	35	0.877333	P22087	FBL	rRNA 2'-O-methyltransferase fibrillarin, 2.1.1.-, 34 kDa nucleolar scleroderma antigen, Histone-glutamine methyltransferase, U6 snRNA 2'-O-methyltransferase fibrillarin	-1.2795	-0.999005	0.355868	2.26918	1.0-10.0%		CL0588	Ribos_L15p_L18e	45	3	0.692303	P46776	RPL27A	60S ribosomal protein L27a, Large ribosomal subunit protein uL15	-1.02923	-1.4379	-0.309396	0.49046	0.1-1.0%
CL0063	NADP_Rossmann	72	35	0.877333	Q8IY81	FTSJ3	pre-rRNA 2'-O-ribose RNA methyltransferase FTSJ3, 2.1.1.-, Protein ftsJ homolog 3, Putative rRNA methyltransferase 3	-1.65371	-1.53459	0.156079	1.43245	1.0-10.0%		CL0588	Ribos_L15p_L18e	45	3	0.692303	Q07020	RPL18	60S ribosomal protein L18, Large ribosomal subunit protein eL18	-0.886762	-1.81109	-0.828336	0.148479	0.1-1.0%
CL0063	NADP_Rossmann	72	35	0.877333	Q8IZ69	TRMT2A	tRNA (uracil-5-)-methyltransferase homolog A, 2.1.1.35, mRNA (uracil-5-)-methyltransferase TRMT2A, 2.1.1.-	-2.7584	-1.9748	0.0475074	1.1156	1.0-10.0%		CL0492	S4	46	3	0.663114	Q9NV31	IMP3	U3 small nucleolar ribonucleoprotein protein IMP3, U3 snoRNP protein IMP3, BRMS2	-2.72596	-2.61751	0.195279	1.56776	1.0-10.0%
CL0063	NADP_Rossmann	72	35	0.877333	Q9NXH9	TRMT1	tRNA (guanine(26)-N(2))-dimethyltransferase, 2.1.1.216, tRNA 2,2-dimethylguanosine-26 methyltransferase, tRNA(guanine-26,N(2)-N(2)) methyltransferase, tRNA(m(2,2)G26)dimethyltransferase	-2.10498	-2.13157	0.0446353	1.10824	1.0-10.0%		CL0492	S4	46	3	0.663114	P46781	RPS9	40S ribosomal protein S9, Small ribosomal subunit protein uS4	-0.72841	-1.32	-0.513871	0.306287	0.1-1.0%
CL0063	NADP_Rossmann	72	35	0.877333	Q7Z2T5	TRMT1L	TRMT1-like protein, 2.1.1.-	-2.95475	-2.5155	-0.0209882	0.952822	0.1-1.0%		CL0492	S4	46	3	0.663114	P62701	RPS4X	40S ribosomal protein S4, X isoform, SCR10, Single copy abundant mRNA protein, Small ribosomal subunit protein eS4	-0.493616	-1.42883	-0.938189	0.115295	0.1-1.0%
CL0063	NADP_Rossmann	72	35	0.877333	P46087	NOP2	Probable 28S rRNA (cytosine(4447)-C(5))-methyltransferase, 2.1.1.-, Nucleolar protein 1, Nucleolar protein 2 homolog, Proliferating-cell nucleolar antigen p120, Proliferation-associated nucleolar protein p120	-1.24419	-1.34228	-0.0259998	0.94189	0.1-1.0%		CL0101	PELOTA	47	8	0.626739	Q9NX24	NHP2	H/ACA ribonucleoprotein complex subunit 2, Nucleolar protein family A member 2, snoRNP protein NHP2	-2.15442	-2.02193	0.24028	1.73892	1.0-10.0%
CL0063	NADP_Rossmann	72	35	0.877333	O43148	RNMT	mRNA cap guanine-N7 methyltransferase, 2.1.1.56, RG7MT1, mRNA (guanine-N(7))-methyltransferase, mRNA cap methyltransferase, hCMT1, hMet, hcm1p	-2.70613	-2.89846	-0.0948973	0.803716	0.1-1.0%		CL0101	PELOTA	47	8	0.626739	Q6IN84	MRM1	rRNA methyltransferase 1, mitochondrial, 2.1.1.-, 16S rRNA (guanosine(1145)-2'-O)-methyltransferase, 16S rRNA [Gm1145] 2'-O-methyltransferase	-3.15975	-3.08516	0.117545	1.31083	1.0-10.0%
CL0063	NADP_Rossmann	72	35	0.877333	Q9H5Q4	TFB2M	Dimethyladenosine transferase 2, mitochondrial, 2.1.1.-, Hepatitis C virus NS5A-transactivated protein 5, HCV NS5A-transactivated protein 5, Mitochondrial 12S rRNA dimethylase 2, Mitochondrial transcription factor B2, h-mtTFB, h-mtTFB2, hTFB2M, mtTFB2, S-adenosylmethionine-6-N', N'-adenosyl(rRNA) dimethyltransferase 2	-2.65907	-2.75333	-0.137767	0.72817	0.1-1.0%		CL0101	PELOTA	47	8	0.626739	P78345	RPP38	Ribonuclease P protein subunit p38, RNaseP protein p38	-2.99573	-3.10841	0.0119427	1.02788	1.0-10.0%
CL0063	NADP_Rossmann	72	35	0.877333	Q08J23	NSUN2	RNA cytosine C(5)-methyltransferase NSUN2, 2.1.1.-, Myc-induced SUN domain-containing protein, Misu, NOL1/NOP2/Sun domain family member 2, Substrate of AIM1/Aurora kinase B, mRNA cytosine C(5)-methyltransferase, tRNA cytosine C(5)-methyltransferase, 2.1.1.203, tRNA methyltransferase 4 homolog, hTrm4	-1.16308	-1.1091	-0.144632	0.71675	0.1-1.0%		CL0101	PELOTA	47	8	0.626739	P62888	RPL30	60S ribosomal protein L30, Large ribosomal subunit protein eL30	-0.851115	-1.33193	-0.385213	0.411895	0.1-1.0%
CL0063	NADP_Rossmann	72	35	0.877333	Q96CB9	NSUN4	5-methylcytosine rRNA methyltransferase NSUN4, 2.1.1.-, 5-methylcytosine tRNA methyltransferase NSUN4, NOL1/NOP2/Sun domain family member 4	-3.32834	-3.49827	-0.200983	0.62953	0.1-1.0%		CL0101	PELOTA	47	8	0.626739	P62424	RPL7A	60S ribosomal protein L7a, Large ribosomal subunit protein eL8, PLA-X polypeptide, Surfeit locus protein 3	-0.49844	-1.27942	-0.686764	0.205701	0.1-1.0%
CL0063	NADP_Rossmann	72	35	0.877333	Q9UNQ2	DIMT1	Probable dimethyladenosine transferase, 2.1.1.183, DIM1 dimethyladenosine transferase 1 homolog, DIM1 dimethyladenosine transferase 1-like, Probable 18S rRNA (adenine(1779)-N(6)/adenine(1780)-N(6))-dimethyltransferase, Probable 18S rRNA dimethylase, Probable S-adenosylmethionine-6-N',N'-adenosyl(rRNA) dimethyltransferase	-2.21887	-2.52719	-0.206284	0.621894	0.1-1.0%		CL0101	PELOTA	47	8	0.626739	P62495	ETF1	Eukaryotic peptide chain release factor subunit 1, Eukaryotic release factor 1, eRF1, Protein Cl1, TB3-1	-1.58076	-2.29465	-0.732296	0.185227	0.1-1.0%
CL0063	NADP_Rossmann	72	35	0.877333	Q8WVM0	TFB1M	Dimethyladenosine transferase 1, mitochondrial, 2.1.1.-, Mitochondrial 12S rRNA dimethylase 1, Mitochondrial transcription factor B1, h-mtTFB, h-mtTFB1, hTFB1M, mtTFB1, S-adenosylmethionine-6-N', N'-adenosyl(rRNA) dimethyltransferase 1	-3.51531	-3.19415	-0.237267	0.579072	0.1-1.0%		CL0101	PELOTA	47	8	0.626739	P25398	RPS12	40S ribosomal protein S12, Small ribosomal subunit protein eS12	-1.27236	-2.53154	-1.16031	0.0691342	0.01-0.1%
CL0063	NADP_Rossmann	72	35	0.877333	O43865	AHCYL1	S-adenosylhomocysteine hydrolase-like protein 1, DC-expressed AHCY-like molecule, IP(3)Rs binding protein released with IP(3), IRBIT, Putative adenosylhomocysteinase 2, S-adenosyl-L-homocysteine hydrolase 2, AdoHcyase 2	-0.128598	-1.00666	-0.748447	0.178465	0.1-1.0%		CL0101	PELOTA	47	8	0.626739	P55769	SNU13	NHP2-like protein 1, High mobility group-like nuclear protein 2 homolog 1, OTK27, SNU13 homolog, hSNU13, U4/U6.U5 small nuclear ribonucleoprotein SNU13, U4/U6.U5 tri-snRNP 15.5 kDa protein	-1.76991	-3.04827	-1.1916	0.0643273	0.01-0.1%
CL0063	NADP_Rossmann	72	35	0.877333	P26358	DNMT1	DNA (cytosine-5)-methyltransferase 1, Dnmt1, 2.1.1.37, CXXC-type zinc finger protein 9, DNA methyltransferase HsaI, DNA MTase HsaI, M.HsaI, MCMT	-1.70874	-2.94308	-1.20088	0.0629685	0.01-0.1%		CL0001	EGF	48	4	0.58931	O15230	LAMA5	Laminin subunit alpha-5, Laminin-10 subunit alpha, Laminin-11 subunit alpha, Laminin-15 subunit alpha	-3.5183	-3.24084	0.124636	1.3324	1.0-10.0%
CL0063	NADP_Rossmann	72	35	0.877333	A0AVT1	UBA6	Ubiquitin-like modifier-activating enzyme 6, Ubiquitin-activating enzyme 6, 6.2.1.45, Monocyte protein 4, MOP-4, Ubiquitin-activating enzyme E1-like protein 2, E1-L2	-2.47884	-3.3643	-1.2103	0.0616164	0.01-0.1%		CL0001	EGF	48	4	0.58931	Q07954	LRP1	Prolow-density lipoprotein receptor-related protein 1, LRP-1, Alpha-2-macroglobulin receptor, A2MR, Apolipoprotein E receptor, APOER, CD91	-3.84553	-3.64325	-0.308978	0.490933	0.1-1.0%
CL0063	NADP_Rossmann	72	35	0.877333	P00367	GLUD1	Glutamate dehydrogenase 1, mitochondrial, GDH 1, 1.4.1.3	-1.45848	-2.78172	-1.40124	0.0396969	0.01-0.1%		CL0001	EGF	48	4	0.58931	P25391	LAMA1	Laminin subunit alpha-1, Laminin A chain, Laminin-1 subunit alpha, Laminin-3 subunit alpha, S-laminin subunit alpha, S-LAM alpha	-3.07034	-3.25901	-0.38078	0.416122	0.1-1.0%
CL0063	NADP_Rossmann	72	35	0.877333	A0A0U1RQF0	FASN	Fatty acid synthase, 1.1.1.100, 1.3.1.39, 2.3.1.38, 2.3.1.39, 2.3.1.41, 2.3.1.85, 3.1.2.14, 4.2.1.59	-0.47073	-1.45308	-1.40476	0.0393763	0.01-0.1%		CL0001	EGF	48	4	0.58931	P05556	ITGB1	Integrin beta-1, Fibronectin receptor subunit beta, Glycoprotein IIa, GPIIA, VLA-4 subunit beta, CD29	-1.46676	-2.19246	-0.928926	0.117781	0.1-1.0%
CL0063	NADP_Rossmann	72	35	0.877333	Q99714	HSD17B10	3-hydroxyacyl-CoA dehydrogenase type-2, 1.1.1.35, 17-beta-estradiol 17-dehydrogenase, 1.1.1.62, 2-methyl-3-hydroxybutyryl-CoA dehydrogenase, MHBD, 3-alpha-(17-beta)-hydroxysteroid dehydrogenase (NAD(+)), 1.1.1.239, 3-hydroxy-2-methylbutyryl-CoA dehydrogenase, 1.1.1.178, 3-hydroxyacyl-CoA dehydrogenase type II, 3alpha(or 20beta)-hydroxysteroid dehydrogenase, 1.1.1.53, 7-alpha-hydroxysteroid dehydr…	-1.42538	-2.72874	-1.48865	0.03246	0.01-0.1%		CL0202	GBD	49	4	0.50711	O15230	LAMA5	Laminin subunit alpha-5, Laminin-10 subunit alpha, Laminin-11 subunit alpha, Laminin-15 subunit alpha	-3.5183	-3.24084	0.124636	1.3324	1.0-10.0%
CL0063	NADP_Rossmann	72	35	0.877333	P31040	SDHA	Succinate dehydrogenase [ubiquinone] flavoprotein subunit, mitochondrial, 1.3.5.1, Flavoprotein subunit of complex II, Fp	-1.67354	-3.06906	-1.53413	0.0292328	0.01-0.1%		CL0202	GBD	49	4	0.50711	P25391	LAMA1	Laminin subunit alpha-1, Laminin A chain, Laminin-1 subunit alpha, Laminin-3 subunit alpha, S-laminin subunit alpha, S-LAM alpha	-3.07034	-3.25901	-0.38078	0.416122	0.1-1.0%
CL0063	NADP_Rossmann	72	35	0.877333	Q6UB35	MTHFD1L	Monofunctional C1-tetrahydrofolate synthase, mitochondrial, 6.3.4.3, Formyltetrahydrofolate synthetase	-2.00634	-3.41703	-1.57338	0.0267066	0.01-0.1%		CL0202	GBD	49	4	0.50711	P17655	CAPN2	Calpain-2 catalytic subunit, 3.4.22.53, Calcium-activated neutral proteinase 2, CANP 2, Calpain M-type, Calpain large polypeptide L2, Calpain-2 large subunit, Millimolar-calpain, M-calpain	-1.80847	-1.8998	-0.682119	0.207913	0.1-1.0%
CL0063	NADP_Rossmann	72	35	0.877333	P50395	GDI2	Rab GDP dissociation inhibitor beta, Rab GDI beta, Guanosine diphosphate dissociation inhibitor 2, GDI-2	-0.901538	-2.32821	-1.61544	0.0242416	0.01-0.1%		CL0202	GBD	49	4	0.50711	Q9ULT8	HECTD1	E3 ubiquitin-protein ligase HECTD1, 2.3.2.26, E3 ligase for inhibin receptor, EULIR, HECT domain-containing protein 1	-2.35756	-3.4021	-1.14264	0.0720039	0.01-0.1%
CL0063	NADP_Rossmann	72	35	0.877333	P51659	HSD17B4	Peroxisomal multifunctional enzyme type 2, MFE-2, 17-beta-hydroxysteroid dehydrogenase 4, 17-beta-HSD 4, D-bifunctional protein, DBP, Multifunctional protein 2, MFP-2, Short chain dehydrogenase/reductase family 8C member 1	-1.56952	-2.66176	-1.6981	0.02004	0.01-0.1%		CL0266	PH	50	20	0.500565	O14578	CIT	Citron Rho-interacting kinase, CRIK, 2.7.11.1, Serine/threonine-protein kinase 21	-3.73977	-2.9699	0.719413	5.24098	1.0-10.0%
CL0063	NADP_Rossmann	72	35	0.877333	P40939	HADHA	Trifunctional enzyme subunit alpha, mitochondrial, 78 kDa gastrin-binding protein, Monolysocardiolipin acyltransferase, 2.3.1.-, TP-alpha, Long-chain enoyl-CoA hydratase, 4.2.1.17, Long chain 3-hydroxyacyl-CoA dehydrogenase, 1.1.1.211	-1.55456	-3.06881	-1.72285	0.0189299	0.01-0.1%		CL0266	PH	50	20	0.500565	O60333	KIF1B	Kinesin-like protein KIF1B, Klp	-3.82451	-3.65292	0.118496	1.3137	1.0-10.0%
CL0063	NADP_Rossmann	72	35	0.877333	P11413	G6PD	Glucose-6-phosphate 1-dehydrogenase, G6PD, 1.1.1.49	-1.2635	-2.94445	-1.98135	0.0104388	0.01-0.1%		CL0266	PH	50	20	0.500565	Q12802	AKAP13	A-kinase anchor protein 13, AKAP-13, AKAP-Lbc, Breast cancer nuclear receptor-binding auxiliary protein, Guanine nucleotide exchange factor Lbc, Human thyroid-anchoring protein 31, Lymphoid blast crisis oncogene, LBC oncogene, Non-oncogenic Rho GTPase-specific GTP exchange factor, Protein kinase A-anchoring protein 13, PRKA13, p47	-2.99799	-3.38978	-0.254519	0.55652	0.1-1.0%
CL0063	NADP_Rossmann	72	35	0.877333	P35520	CBS	Cystathionine beta-synthase, 4.2.1.22, Beta-thionase, Serine sulfhydrase	-1.97477	-3.74406	-1.98275	0.0104052	0.01-0.1%		CL0266	PH	50	20	0.500565	Q96AC1	FERMT2	Fermitin family homolog 2, Kindlin-2, Mitogen-inducible gene 2 protein, MIG-2, Pleckstrin homology domain-containing family C member 1, PH domain-containing family C member 1	-1.72453	-1.87016	-0.343325	0.453602	0.1-1.0%
CL0063	NADP_Rossmann	72	35	0.877333	P11586	MTHFD1	C-1-tetrahydrofolate synthase, cytoplasmic, C1-THF synthase, Epididymis secretory sperm binding protein, Methylenetetrahydrofolate dehydrogenase, 1.5.1.5, Methenyltetrahydrofolate cyclohydrolase, 3.5.4.9, Formyltetrahydrofolate synthetase, 6.3.4.3	-1.3351	-3.05981	-2.09352	0.00806276	<0.01%		CL0266	PH	50	20	0.500565	Q92888	ARHGEF1	Rho guanine nucleotide exchange factor 1, 115 kDa guanine nucleotide exchange factor, p115-RhoGEF, p115RhoGEF, Sub1.5	-2.92448	-3.39428	-0.411361	0.387828	0.1-1.0%
CL0063	NADP_Rossmann	72	35	0.877333	P07195	LDHB	L-lactate dehydrogenase B chain, LDH-B, 1.1.1.27, LDH heart subunit, LDH-H, Renal carcinoma antigen NY-REN-46	-0.206174	-2.06358	-2.12228	0.00754612	<0.01%		CL0266	PH	50	20	0.500565	Q70E73	RAPH1	Ras-associated and pleckstrin homology domains-containing protein 1, RAPH1, Amyotrophic lateral sclerosis 2 chromosomal region candidate gene 18 protein, Amyotrophic lateral sclerosis 2 chromosomal region candidate gene 9 protein, Lamellipodin, Proline-rich EVH1 ligand 2, PREL-2, Protein RMO1	-3.42707	-4.08825	-0.426393	0.374634	0.1-1.0%
CL0063	NADP_Rossmann	72	35	0.877333	P53396	ACLY	ATP-citrate synthase, 2.3.3.8, ATP-citrate (pro-S-)-lyase, ACL, Citrate cleavage enzyme	-0.85111	-2.63479	-2.30954	0.00490297	<0.01%		CL0266	PH	50	20	0.500565	Q9NZN5	ARHGEF12	Rho guanine nucleotide exchange factor 12, Leukemia-associated RhoGEF	-3.7469	-4.13927	-0.474997	0.334968	0.1-1.0%
CL0063	NADP_Rossmann	72	35	0.877333	O43175	PHGDH	D-3-phosphoglycerate dehydrogenase, 3-PGDH, 1.1.1.95, 2-oxoglutarate reductase, 1.1.1.399, Malate dehydrogenase, 1.1.1.37	-0.684517	-2.517	-2.34179	0.00455206	<0.01%		CL0266	PH	50	20	0.500565	Q92974	ARHGEF2	Rho guanine nucleotide exchange factor 2, Guanine nucleotide exchange factor H1, GEF-H1, Microtubule-regulated Rho-GEF, Proliferating cell nucleolar antigen p40	-2.31875	-2.93295	-0.558456	0.276404	0.1-1.0%
CL0063	NADP_Rossmann	72	35	0.877333	Q99536	VAT1	Synaptic vesicle membrane protein VAT-1 homolog, 1.-.-.-	-1.93601	-3.64299	-2.3438	0.00453108	<0.01%		CL0266	PH	50	20	0.500565	O75962	TRIO	Triple functional domain protein, 2.7.11.1, PTPRF-interacting protein	-3.40354	-3.77632	-0.651686	0.223005	0.1-1.0%
CL0063	NADP_Rossmann	72	35	0.877333	P04406	GAPDH	Glyceraldehyde-3-phosphate dehydrogenase, GAPDH, 1.2.1.12, Peptidyl-cysteine S-nitrosylase GAPDH, 2.6.99.-	0.349412	-1.55173	-2.7784	0.0016657	<0.01%		CL0266	PH	50	20	0.500565	P49792	RANBP2	E3 SUMO-protein ligase RanBP2, 2.3.2.-, 358 kDa nucleoporin, Nuclear pore complex protein Nup358, Nucleoporin Nup358, Ran-binding protein 2, RanBP2, p270	-1.4217	-2.30098	-0.905955	0.124178	0.1-1.0%
CL0098	SPOUT	73	4	0.859013	Q9HC36	MRM3	rRNA methyltransferase 3, mitochondrial, 2.1.1.-, 16S rRNA (guanosine(1370)-2'-O)-methyltransferase, 16S rRNA [Gm1370] 2'-O-methyltransferase, RNA methyltransferase-like protein 1	-2.42484	-2.40149	0.120087	1.31852	1.0-10.0%		CL0266	PH	50	20	0.500565	P15311	EZR	Ezrin, Cytovillin, Villin-2, p81	-1.03171	-1.95654	-0.959898	0.109673	0.1-1.0%
CL0098	SPOUT	73	4	0.859013	Q6IN84	MRM1	rRNA methyltransferase 1, mitochondrial, 2.1.1.-, 16S rRNA (guanosine(1145)-2'-O)-methyltransferase, 16S rRNA [Gm1145] 2'-O-methyltransferase	-3.15975	-3.08516	0.117545	1.31083	1.0-10.0%		CL0266	PH	50	20	0.500565	Q9NQW6	ANLN	Anillin	-2.45599	-3.14359	-0.965378	0.108298	0.1-1.0%
CL0098	SPOUT	73	4	0.859013	Q7L0Y3	TRMT10C	tRNA methyltransferase 10 homolog C, HBV pre-S2 trans-regulated protein 2, Mitochondrial ribonuclease P protein 1, Mitochondrial RNase P protein 1, RNA (guanine-9-)-methyltransferase domain-containing protein 1, Renal carcinoma antigen NY-REN-49, mRNA methyladenosine-N(1)-methyltransferase, 2.1.1.-, tRNA (adenine(9)-N(1))-methyltransferase, 2.1.1.218, tRNA (guanine(9)-N(1))-methyltransferase, 2.1…	-1.86086	-1.93607	-0.22727	0.592556	0.1-1.0%		CL0266	PH	50	20	0.500565	Q9Y5B9	SUPT16H	FACT complex subunit SPT16, Chromatin-specific transcription elongation factor 140 kDa subunit, FACT 140 kDa subunit, FACTp140, Facilitates chromatin transcription complex subunit SPT16, hSPT16	-1.36412	-2.00472	-1.041	0.0909907	0.01-0.1%
CL0098	SPOUT	73	4	0.859013	Q92979	EMG1	Ribosomal RNA small subunit methyltransferase NEP1, 2.1.1.-, 18S rRNA (pseudouridine(1248)-N1)-methyltransferase, 18S rRNA Psi1248 methyltransferase, Nucleolar protein EMG1 homolog, Protein C2f, Ribosome biogenesis protein NEP1	-1.71808	-2.47354	-0.669283	0.21415	0.1-1.0%		CL0266	PH	50	20	0.500565	P26038	MSN	Moesin, Membrane-organizing extension spike protein	-0.58601	-1.67826	-1.04432	0.0902986	0.01-0.1%
CL0462	TPA-repeat	74	1	0.836629	O75533	SF3B1	Splicing factor 3B subunit 1, Pre-mRNA-splicing factor SF3b 155 kDa subunit, SF3b155, Spliceosome-associated protein 155, SAP 155	-1.48689	-1.62765	-0.0774671	0.836629	0.1-1.0%		CL0266	PH	50	20	0.500565	Q01082	SPTBN1	Spectrin beta chain, non-erythrocytic 1, Beta-II spectrin, Fodrin beta chain, Spectrin, non-erythroid beta chain 1	-1.25915	-2.32229	-1.06079	0.0869385	0.01-0.1%
CL0475	Cyclophil-like	75	5	0.787062	Q8WUA2	PPIL4	Peptidyl-prolyl cis-trans isomerase-like 4, PPIase, 5.2.1.8, Cyclophilin-like protein PPIL4, Rotamase PPIL4	-3.06517	-2.491	0.421802	2.6412	1.0-10.0%		CL0266	PH	50	20	0.500565	Q9HD67	MYO10	Unconventional myosin-X, Unconventional myosin-10	-3.71827	-4.37218	-1.06277	0.0865429	0.01-0.1%
CL0475	Cyclophil-like	75	5	0.787062	Q13427	PPIG	Peptidyl-prolyl cis-trans isomerase G, PPIase G, Peptidyl-prolyl isomerase G, 5.2.1.8, CASP10, Clk-associating RS-cyclophilin, CARS-Cyp, CARS-cyclophilin, SR-cyclophilin, SR-cyp, SRcyp, Cyclophilin G, Rotamase G	-2.79421	-2.68423	0.0585618	1.14436	1.0-10.0%		CL0266	PH	50	20	0.500565	P35241	RDX	Radixin	-1.75974	-3.01411	-1.24359	0.0570707	0.01-0.1%
CL0475	Cyclophil-like	75	5	0.787062	P49792	RANBP2	E3 SUMO-protein ligase RanBP2, 2.3.2.-, 358 kDa nucleoporin, Nuclear pore complex protein Nup358, Nucleoporin Nup358, Ran-binding protein 2, RanBP2, p270	-1.4217	-2.30098	-0.905955	0.124178	0.1-1.0%		CL0266	PH	50	20	0.500565	Q66K14	TBC1D9B	TBC1 domain family member 9B	-3.44878	-4.16071	-1.34842	0.0448314	0.01-0.1%
CL0475	Cyclophil-like	75	5	0.787062	P62937	PPIA	Peptidyl-prolyl cis-trans isomerase A, PPIase A, 5.2.1.8, Cyclophilin A, Cyclosporin A-binding protein, Rotamase A	0.073448	-1.63986	-1.76342	0.0172416	0.01-0.1%		CL0266	PH	50	20	0.500565	Q12965	MYO1E	Unconventional myosin-Ie, Myosin-Ic, Unconventional myosin 1E	-1.64247	-2.88575	-1.36688	0.0429653	0.01-0.1%
CL0475	Cyclophil-like	75	5	0.787062	P23284	PPIB	Peptidyl-prolyl cis-trans isomerase B, PPIase B, 5.2.1.8, CYP-S1, Cyclophilin B, Rotamase B, S-cyclophilin, SCYLP	-0.535106	-2.58957	-2.07927	0.00833156	<0.01%		CL0266	PH	50	20	0.500565	O00159	MYO1C	Unconventional myosin-Ic, Myosin I beta, MMI-beta, MMIb	-1.65094	-3.49167	-2.10453	0.00786086	<0.01%
CL0399	Asp-glut_race	76	1	0.750008	P27708	CAD	CAD protein, Glutamine-dependent carbamoyl-phosphate synthase, 6.3.5.5, Aspartate carbamoyltransferase, 2.1.3.2, Dihydroorotase, 3.5.2.3	-1.35296	-1.06691	-0.124934	0.750008	0.1-1.0%		CL0541	SH2-like	51	5	0.488527	Q7KZ85	SUPT6H	Transcription elongation factor SPT6, hSPT6, Histone chaperone suppressor of Ty6, Tat-cotransactivator 2 protein, Tat-CT2 protein	-2.15682	-1.97292	0.225931	1.6824	1.0-10.0%
CL0034	Amidohydrolase	77	2	0.733579	P27708	CAD	CAD protein, Glutamine-dependent carbamoyl-phosphate synthase, 6.3.5.5, Aspartate carbamoyltransferase, 2.1.3.2, Dihydroorotase, 3.5.2.3	-1.35296	-1.06691	-0.124934	0.750008	0.1-1.0%		CL0541	SH2-like	51	5	0.488527	O15357	INPPL1	Phosphatidylinositol 3,4,5-trisphosphate 5-phosphatase 2, 3.1.3.86, Inositol polyphosphate phosphatase-like protein 1, INPPL-1, Protein 51C, SH2 domain-containing inositol 5'-phosphatase 2, SH2 domain-containing inositol phosphatase 2, SHIP-2	-2.69659	-2.83962	-0.249462	0.563039	0.1-1.0%
CL0034	Amidohydrolase	77	2	0.733579	P78346	RPP30	Ribonuclease P protein subunit p30, RNaseP protein p30, RNase P subunit 2	-2.44986	-2.69184	-0.14439	0.717151	0.1-1.0%		CL0541	SH2-like	51	5	0.488527	P40763	STAT3	Signal transducer and activator of transcription 3, Acute-phase response factor	-1.51957	-2.29147	-0.943827	0.113808	0.1-1.0%
CL0382	DNA-mend	78	1	0.730234	P11387	TOP1	DNA topoisomerase 1, 5.6.2.1, DNA topoisomerase I	-1.46682	-1.69941	-0.136538	0.730234	0.1-1.0%		CL0541	SH2-like	51	5	0.488527	P42226	STAT6	Signal transducer and activator of transcription 6, IL-4 Stat	-2.73534	-3.83169	-1.23362	0.0583957	0.01-0.1%
CL0588	Ribos_L15p_L18e	79	3	0.692303	Q9P015	MRPL15	39S ribosomal protein L15, mitochondrial, L15mt, MRP-L15, Mitochondrial large ribosomal subunit protein uL15m	-2.26766	-2.17133	0.15775	1.43797	1.0-10.0%		CL0541	SH2-like	51	5	0.488527	P42224	STAT1	Signal transducer and activator of transcription 1-alpha/beta, Transcription factor ISGF-3 components p91/p84	-2.27123	-3.53016	-1.60231	0.0249855	0.01-0.1%
CL0588	Ribos_L15p_L18e	79	3	0.692303	P46776	RPL27A	60S ribosomal protein L27a, Large ribosomal subunit protein uL15	-1.02923	-1.4379	-0.309396	0.49046	0.1-1.0%		CL0437	EF-G_C	52	4	0.488244	Q15029	EFTUD2	116 kDa U5 small nuclear ribonucleoprotein component, Elongation factor Tu GTP-binding domain-containing protein 2, SNU114 homolog, hSNU114, U5 snRNP-specific protein, 116 kDa, U5-116 kDa	-1.10422	-0.973399	0.160317	1.4465	1.0-10.0%
CL0588	Ribos_L15p_L18e	79	3	0.692303	Q07020	RPL18	60S ribosomal protein L18, Large ribosomal subunit protein eL18	-0.886762	-1.81109	-0.828336	0.148479	0.1-1.0%		CL0437	EF-G_C	52	4	0.488244	Q9Y3A5	SBDS	Ribosome maturation protein SBDS, Shwachman-Bodian-Diamond syndrome protein	-1.49978	-2.1933	-0.607077	0.247129	0.1-1.0%
CL0492	S4	80	3	0.663114	Q9NV31	IMP3	U3 small nucleolar ribonucleoprotein protein IMP3, U3 snoRNP protein IMP3, BRMS2	-2.72596	-2.61751	0.195279	1.56776	1.0-10.0%		CL0437	EF-G_C	52	4	0.488244	P13639	EEF2	Elongation factor 2, EF-2	-0.0138232	-0.760362	-0.753756	0.176297	0.1-1.0%
CL0492	S4	80	3	0.663114	P46781	RPS9	40S ribosomal protein S9, Small ribosomal subunit protein uS4	-0.72841	-1.32	-0.513871	0.306287	0.1-1.0%		CL0437	EF-G_C	52	4	0.488244	Q96RP9	GFM1	Elongation factor G, mitochondrial, EF-Gmt, Elongation factor G 1, mitochondrial, mEF-G 1, Elongation factor G1, hEFG1	-1.89499	-2.82656	-1.08064	0.0830536	0.01-0.1%
CL0492	S4	80	3	0.663114	P62701	RPS4X	40S ribosomal protein S4, X isoform, SCR10, Single copy abundant mRNA protein, Small ribosomal subunit protein eS4	-0.493616	-1.42883	-0.938189	0.115295	0.1-1.0%		CL0022	LRR	53	8	0.470271	Q8N1G4	LRRC47	Leucine-rich repeat-containing protein 47	-2.07536	-1.76396	0.4044	2.53746	1.0-10.0%
CL0417	BIR-like	81	1	0.636694	Q9NR09	BIRC6	Baculoviral IAP repeat-containing protein 6, 2.3.2.27, BIR repeat-containing ubiquitin-conjugating enzyme, BRUCE, RING-type E3 ubiquitin transferase BIRC6, Ubiquitin-conjugating BIR domain enzyme apollon, APOLLON	-3.13384	-3.01218	-0.196069	0.636694	0.1-1.0%		CL0022	LRR	53	8	0.470271	Q96AG4	LRRC59	Leucine-rich repeat-containing protein 59, Ribosome-binding protein p34, p34	-1.562	-1.98628	-0.323017	0.475317	0.1-1.0%
CL0101	PELOTA	82	8	0.626739	Q9NX24	NHP2	H/ACA ribonucleoprotein complex subunit 2, Nucleolar protein family A member 2, snoRNP protein NHP2	-2.15442	-2.02193	0.24028	1.73892	1.0-10.0%		CL0022	LRR	53	8	0.470271	Q14160	SCRIB	Protein scribble homolog, Scribble, hScrib, Protein LAP4	-2.87948	-3.28604	-0.654079	0.221779	0.1-1.0%
CL0101	PELOTA	82	8	0.626739	Q6IN84	MRM1	rRNA methyltransferase 1, mitochondrial, 2.1.1.-, 16S rRNA (guanosine(1145)-2'-O)-methyltransferase, 16S rRNA [Gm1145] 2'-O-methyltransferase	-3.15975	-3.08516	0.117545	1.31083	1.0-10.0%		CL0022	LRR	53	8	0.470271	Q9H9A6	LRRC40	Leucine-rich repeat-containing protein 40	-1.96031	-2.45464	-0.690407	0.203983	0.1-1.0%
CL0101	PELOTA	82	8	0.626739	P78345	RPP38	Ribonuclease P protein subunit p38, RNaseP protein p38	-2.99573	-3.10841	0.0119427	1.02788	1.0-10.0%		CL0022	LRR	53	8	0.470271	P00533	EGFR	Epidermal growth factor receptor, 2.7.10.1, Proto-oncogene c-ErbB-1, Receptor tyrosine-protein kinase erbB-1	-2.01767	-2.63776	-0.798329	0.1591	0.1-1.0%
CL0101	PELOTA	82	8	0.626739	P62888	RPL30	60S ribosomal protein L30, Large ribosomal subunit protein eL30	-0.851115	-1.33193	-0.385213	0.411895	0.1-1.0%		CL0022	LRR	53	8	0.470271	Q92688	ANP32B	Acidic leucine-rich nuclear phosphoprotein 32 family member B, Acidic protein rich in leucines, Putative HLA-DR-associated protein I-2, PHAPI2, Silver-stainable protein SSP29	-1.51854	-2.56489	-1.00566	0.0987054	0.01-0.1%
CL0101	PELOTA	82	8	0.626739	P62424	RPL7A	60S ribosomal protein L7a, Large ribosomal subunit protein eL8, PLA-X polypeptide, Surfeit locus protein 3	-0.49844	-1.27942	-0.686764	0.205701	0.1-1.0%		CL0022	LRR	53	8	0.470271	P46060	RANGAP1	Ran GTPase-activating protein 1, RanGAP1	-1.65412	-3.05596	-1.3788	0.0418019	0.01-0.1%
CL0101	PELOTA	82	8	0.626739	P62495	ETF1	Eukaryotic peptide chain release factor subunit 1, Eukaryotic release factor 1, eRF1, Protein Cl1, TB3-1	-1.58076	-2.29465	-0.732296	0.185227	0.1-1.0%		CL0022	LRR	53	8	0.470271	Q13045	FLII	Protein flightless-1 homolog	-1.83951	-3.20733	-1.61943	0.0240198	0.01-0.1%
CL0101	PELOTA	82	8	0.626739	P25398	RPS12	40S ribosomal protein S12, Small ribosomal subunit protein eS12	-1.27236	-2.53154	-1.16031	0.0691342	0.01-0.1%		CL0072	Ubiquitin	54	23	0.460989	Q15646	OASL	2'-5'-oligoadenylate synthase-like protein, 2'-5'-OAS-related protein, 2'-5'-OAS-RP, 59 kDa 2'-5'-oligoadenylate synthase-like protein, Thyroid receptor-interacting protein 14, TR-interacting protein 14, TRIP-14, p59 OASL, p59OASL	-3.48485	-3.10161	0.361729	2.30001	1.0-10.0%
CL0101	PELOTA	82	8	0.626739	P55769	SNU13	NHP2-like protein 1, High mobility group-like nuclear protein 2 homolog 1, OTK27, SNU13 homolog, hSNU13, U4/U6.U5 small nuclear ribonucleoprotein SNU13, U4/U6.U5 tri-snRNP 15.5 kDa protein	-1.76991	-3.04827	-1.1916	0.0643273	0.01-0.1%		CL0072	Ubiquitin	54	23	0.460989	Q6IQ49	SDE2	Splicing regulator SDE2, Replication stress response regulator SDE2	-2.92075	-2.70563	0.310209	2.04272	1.0-10.0%
CL0261	NUDIX	83	1	0.59635	O43809	NUDT21	Cleavage and polyadenylation specificity factor subunit 5, Cleavage and polyadenylation specificity factor 25 kDa subunit, CPSF 25 kDa subunit, Cleavage factor Im complex 25 kDa subunit, CFIm25, Nucleoside diphosphate-linked moiety X motif 21, Nudix motif 21, Nudix hydrolase 21, Pre-mRNA cleavage factor Im 68 kDa subunit	-2.13742	-2.44658	-0.224498	0.59635	0.1-1.0%		CL0072	Ubiquitin	54	23	0.460989	Q15459	SF3A1	Splicing factor 3A subunit 1, SF3a120, Spliceosome-associated protein 114, SAP 114	-1.46139	-1.31213	0.17078	1.48177	1.0-10.0%
CL0001	EGF	84	4	0.58931	O15230	LAMA5	Laminin subunit alpha-5, Laminin-10 subunit alpha, Laminin-11 subunit alpha, Laminin-15 subunit alpha	-3.5183	-3.24084	0.124636	1.3324	1.0-10.0%		CL0072	Ubiquitin	54	23	0.460989	Q7Z6E9	RBBP6	E3 ubiquitin-protein ligase RBBP6, 2.3.2.27, Proliferation potential-related protein, Protein P2P-R, RING-type E3 ubiquitin transferase RBBP6, Retinoblastoma-binding Q protein 1, RBQ-1, Retinoblastoma-binding protein 6, p53-associated cellular protein of testis	-2.51264	-2.51925	0.0618295	1.153	1.0-10.0%
CL0001	EGF	84	4	0.58931	Q07954	LRP1	Prolow-density lipoprotein receptor-related protein 1, LRP-1, Alpha-2-macroglobulin receptor, A2MR, Apolipoprotein E receptor, APOER, CD91	-3.84553	-3.64325	-0.308978	0.490933	0.1-1.0%		CL0072	Ubiquitin	54	23	0.460989	Q9Y295	DRG1	Developmentally-regulated GTP-binding protein 1, DRG-1, Neural precursor cell expressed developmentally down-regulated protein 3, NEDD-3, Translation factor GTPase DRG1, TRAFAC GTPase DRG1, 3.6.5.-	-2.00748	-2.32567	-0.262942	0.545831	0.1-1.0%
CL0001	EGF	84	4	0.58931	P25391	LAMA1	Laminin subunit alpha-1, Laminin A chain, Laminin-1 subunit alpha, Laminin-3 subunit alpha, S-laminin subunit alpha, S-LAM alpha	-3.07034	-3.25901	-0.38078	0.416122	0.1-1.0%		CL0072	Ubiquitin	54	23	0.460989	O00422	SAP18	Histone deacetylase complex subunit SAP18, 18 kDa Sin3-associated polypeptide, 2HOR0202, Cell growth-inhibiting gene 38 protein, Sin3-associated polypeptide p18	-1.93296	-2.36496	-0.330128	0.467597	0.1-1.0%
CL0001	EGF	84	4	0.58931	P05556	ITGB1	Integrin beta-1, Fibronectin receptor subunit beta, Glycoprotein IIa, GPIIA, VLA-4 subunit beta, CD29	-1.46676	-2.19246	-0.928926	0.117781	0.1-1.0%		CL0072	Ubiquitin	54	23	0.460989	Q96AC1	FERMT2	Fermitin family homolog 2, Kindlin-2, Mitogen-inducible gene 2 protein, MIG-2, Pleckstrin homology domain-containing family C member 1, PH domain-containing family C member 1	-1.72453	-1.87016	-0.343325	0.453602	0.1-1.0%
CL0530	DNase_I-like	85	1	0.563039	O15357	INPPL1	Phosphatidylinositol 3,4,5-trisphosphate 5-phosphatase 2, 3.1.3.86, Inositol polyphosphate phosphatase-like protein 1, INPPL-1, Protein 51C, SH2 domain-containing inositol 5'-phosphatase 2, SH2 domain-containing inositol phosphatase 2, SHIP-2	-2.69659	-2.83962	-0.249462	0.563039	0.1-1.0%		CL0072	Ubiquitin	54	23	0.460989	P62979	RPS27A	Ubiquitin-40S ribosomal protein S27a, Ubiquitin carboxyl extension protein 80	-0.574283	-1.04055	-0.358288	0.43824	0.1-1.0%
CL0426	HRDC-like	86	2	0.554645	Q01780	EXOSC10	Exosome component 10, 3.1.13.-, Autoantigen PM/Scl 2, P100 polymyositis-scleroderma overlap syndrome-associated autoantigen, Polymyositis/scleroderma autoantigen 100 kDa, PM/Scl-100, Polymyositis/scleroderma autoantigen 2	-2.61245	-2.67686	-0.227111	0.592774	0.1-1.0%		CL0072	Ubiquitin	54	23	0.460989	Q70E73	RAPH1	Ras-associated and pleckstrin homology domains-containing protein 1, RAPH1, Amyotrophic lateral sclerosis 2 chromosomal region candidate gene 18 protein, Amyotrophic lateral sclerosis 2 chromosomal region candidate gene 9 protein, Lamellipodin, Proline-rich EVH1 ligand 2, PREL-2, Protein RMO1	-3.42707	-4.08825	-0.426393	0.374634	0.1-1.0%
CL0426	HRDC-like	86	2	0.554645	P54132	BLM	RecQ-like DNA helicase BLM, 3.6.4.12, Bloom syndrome protein, DNA helicase, RecQ-like type 2, RecQ2, RecQ protein-like 3	-3.36539	-3.7006	-0.286915	0.516517	0.1-1.0%		CL0072	Ubiquitin	54	23	0.460989	P61956	SUMO2	Small ubiquitin-related modifier 2, SUMO-2, HSMT3, SMT3 homolog 2, SUMO-3, Sentrin-2, Ubiquitin-like protein SMT3B, Smt3B	-1.50134	-2.03056	-0.447417	0.35693	0.1-1.0%
CL0459	BRCT-like	87	2	0.518462	O00541	PES1	Pescadillo homolog	-1.31707	-1.48541	-0.0795251	0.832674	0.1-1.0%		CL0072	Ubiquitin	54	23	0.460989	Q9NTK5	OLA1	Obg-like ATPase 1, DNA damage-regulated overexpressed in cancer 45, DOC45, GTP-binding protein 9	-1.77493	-2.35971	-0.594481	0.254401	0.1-1.0%
CL0459	BRCT-like	87	2	0.518462	P09874	PARP1	Poly [ADP-ribose] polymerase, 2.4.2.30	-1.07903	-1.78142	-0.689837	0.20425	0.1-1.0%		CL0072	Ubiquitin	54	23	0.460989	P15311	EZR	Ezrin, Cytovillin, Villin-2, p81	-1.03171	-1.95654	-0.959898	0.109673	0.1-1.0%
CL0202	GBD	88	4	0.50711	O15230	LAMA5	Laminin subunit alpha-5, Laminin-10 subunit alpha, Laminin-11 subunit alpha, Laminin-15 subunit alpha	-3.5183	-3.24084	0.124636	1.3324	1.0-10.0%		CL0072	Ubiquitin	54	23	0.460989	P26038	MSN	Moesin, Membrane-organizing extension spike protein	-0.58601	-1.67826	-1.04432	0.0902986	0.01-0.1%
CL0202	GBD	88	4	0.50711	P25391	LAMA1	Laminin subunit alpha-1, Laminin A chain, Laminin-1 subunit alpha, Laminin-3 subunit alpha, S-laminin subunit alpha, S-LAM alpha	-3.07034	-3.25901	-0.38078	0.416122	0.1-1.0%		CL0072	Ubiquitin	54	23	0.460989	Q9Y490	TLN1	Talin-1	-1.47192	-2.29149	-1.04869	0.0893934	0.01-0.1%
CL0202	GBD	88	4	0.50711	P17655	CAPN2	Calpain-2 catalytic subunit, 3.4.22.53, Calcium-activated neutral proteinase 2, CANP 2, Calpain M-type, Calpain large polypeptide L2, Calpain-2 large subunit, Millimolar-calpain, M-calpain	-1.80847	-1.8998	-0.682119	0.207913	0.1-1.0%		CL0072	Ubiquitin	54	23	0.460989	Q9HD67	MYO10	Unconventional myosin-X, Unconventional myosin-10	-3.71827	-4.37218	-1.06277	0.0865429	0.01-0.1%
CL0202	GBD	88	4	0.50711	Q9ULT8	HECTD1	E3 ubiquitin-protein ligase HECTD1, 2.3.2.26, E3 ligase for inhibin receptor, EULIR, HECT domain-containing protein 1	-2.35756	-3.4021	-1.14264	0.0720039	0.01-0.1%		CL0072	Ubiquitin	54	23	0.460989	Q93009	USP7	Ubiquitin carboxyl-terminal hydrolase 7, 3.4.19.12, Deubiquitinating enzyme 7, Herpesvirus-associated ubiquitin-specific protease, Ubiquitin thioesterase 7, Ubiquitin-specific-processing protease 7	-1.83666	-2.92513	-1.0763	0.0838883	0.01-0.1%
CL0266	PH	89	20	0.500565	O14578	CIT	Citron Rho-interacting kinase, CRIK, 2.7.11.1, Serine/threonine-protein kinase 21	-3.73977	-2.9699	0.719413	5.24098	1.0-10.0%		CL0072	Ubiquitin	54	23	0.460989	Q96T88	UHRF1	E3 ubiquitin-protein ligase UHRF1, 2.3.2.27, Inverted CCAAT box-binding protein of 90 kDa, Nuclear protein 95, Nuclear zinc finger protein Np95, HuNp95, hNp95, RING finger protein 106, RING-type E3 ubiquitin transferase UHRF1, Transcription factor ICBP90, Ubiquitin-like PHD and RING finger domain-containing protein 1, hUHRF1, Ubiquitin-like-containing PHD and RING finger domains protein 1	-2.00224	-3.2404	-1.16141	0.0689581	0.01-0.1%
CL0266	PH	89	20	0.500565	O60333	KIF1B	Kinesin-like protein KIF1B, Klp	-3.82451	-3.65292	0.118496	1.3137	1.0-10.0%		CL0072	Ubiquitin	54	23	0.460989	P35241	RDX	Radixin	-1.75974	-3.01411	-1.24359	0.0570707	0.01-0.1%
CL0266	PH	89	20	0.500565	Q12802	AKAP13	A-kinase anchor protein 13, AKAP-13, AKAP-Lbc, Breast cancer nuclear receptor-binding auxiliary protein, Guanine nucleotide exchange factor Lbc, Human thyroid-anchoring protein 31, Lymphoid blast crisis oncogene, LBC oncogene, Non-oncogenic Rho GTPase-specific GTP exchange factor, Protein kinase A-anchoring protein 13, PRKA13, p47	-2.99799	-3.38978	-0.254519	0.55652	0.1-1.0%		CL0072	Ubiquitin	54	23	0.460989	Q13501	SQSTM1	Sequestosome-1, EBI3-associated protein of 60 kDa, EBIAP, p60, Phosphotyrosine-independent ligand for the Lck SH2 domain of 62 kDa, Ubiquitin-binding protein p62	-1.83886	-2.93747	-1.24629	0.056717	0.01-0.1%
CL0266	PH	89	20	0.500565	Q96AC1	FERMT2	Fermitin family homolog 2, Kindlin-2, Mitogen-inducible gene 2 protein, MIG-2, Pleckstrin homology domain-containing family C member 1, PH domain-containing family C member 1	-1.72453	-1.87016	-0.343325	0.453602	0.1-1.0%		CL0072	Ubiquitin	54	23	0.460989	P26639	TARS1	Threonine--tRNA ligase 1, cytoplasmic, 6.1.1.3, Threonyl-tRNA synthetase, ThrRS, Threonyl-tRNA synthetase 1	-0.829107	-2.24175	-1.40932	0.0389659	0.01-0.1%
CL0266	PH	89	20	0.500565	Q92888	ARHGEF1	Rho guanine nucleotide exchange factor 1, 115 kDa guanine nucleotide exchange factor, p115-RhoGEF, p115RhoGEF, Sub1.5	-2.92448	-3.39428	-0.411361	0.387828	0.1-1.0%		CL0072	Ubiquitin	54	23	0.460989	P55039	DRG2	Developmentally-regulated GTP-binding protein 2, DRG-2, Translation factor GTPase DRG2, TRAFAC GTPase DRG2, 3.6.5.-	-2.07513	-3.38523	-1.42419	0.0376535	0.01-0.1%
CL0266	PH	89	20	0.500565	Q70E73	RAPH1	Ras-associated and pleckstrin homology domains-containing protein 1, RAPH1, Amyotrophic lateral sclerosis 2 chromosomal region candidate gene 18 protein, Amyotrophic lateral sclerosis 2 chromosomal region candidate gene 9 protein, Lamellipodin, Proline-rich EVH1 ligand 2, PREL-2, Protein RMO1	-3.42707	-4.08825	-0.426393	0.374634	0.1-1.0%		CL0072	Ubiquitin	54	23	0.460989	Q9NZJ4	SACS	Sacsin, DnaJ homolog subfamily C member 29, DNAJC29	-2.49549	-4.46617	-2.01642	0.00962905	<0.01%
CL0266	PH	89	20	0.500565	Q9NZN5	ARHGEF12	Rho guanine nucleotide exchange factor 12, Leukemia-associated RhoGEF	-3.7469	-4.13927	-0.474997	0.334968	0.1-1.0%		CL0072	Ubiquitin	54	23	0.460989	Q8TAT6	NPLOC4	Nuclear protein localization protein 4 homolog, Protein NPL4	-2.12324	-3.74627	-2.28159	0.0052289	<0.01%
CL0266	PH	89	20	0.500565	Q92974	ARHGEF2	Rho guanine nucleotide exchange factor 2, Guanine nucleotide exchange factor H1, GEF-H1, Microtubule-regulated Rho-GEF, Proliferating cell nucleolar antigen p40	-2.31875	-2.93295	-0.558456	0.276404	0.1-1.0%		CL0039	HUP	55	17	0.432466	Q13057	COASY	Bifunctional coenzyme A synthase, CoA synthase, NBP, POV-2, Phosphopantetheine adenylyltransferase, 2.7.7.3, Dephospho-CoA pyrophosphorylase, Pantetheine-phosphate adenylyltransferase, PPAT, Dephospho-CoA kinase, DPCK, 2.7.1.24, Dephosphocoenzyme A kinase, DPCOAK	-1.85127	-1.3986	0.524167	3.34324	1.0-10.0%
CL0266	PH	89	20	0.500565	O75962	TRIO	Triple functional domain protein, 2.7.11.1, PTPRF-interacting protein	-3.40354	-3.77632	-0.651686	0.223005	0.1-1.0%		CL0039	HUP	55	17	0.432466	Q96GW9	MARS2	Methionine--tRNA ligase, mitochondrial, 6.1.1.10, Methionyl-tRNA synthetase 2, Mitochondrial methionyl-tRNA synthetase, MtMetRS	-3.62218	-3.34168	0.403012	2.52937	1.0-10.0%
CL0266	PH	89	20	0.500565	P49792	RANBP2	E3 SUMO-protein ligase RanBP2, 2.3.2.-, 358 kDa nucleoporin, Nuclear pore complex protein Nup358, Nucleoporin Nup358, Ran-binding protein 2, RanBP2, p270	-1.4217	-2.30098	-0.905955	0.124178	0.1-1.0%		CL0039	HUP	55	17	0.432466	Q9Y2Z4	YARS2	Tyrosine--tRNA ligase, mitochondrial, 6.1.1.1, Tyrosyl-tRNA synthetase, TyrRS	-1.96242	-2.18402	-0.260097	0.549418	0.1-1.0%
CL0266	PH	89	20	0.500565	P15311	EZR	Ezrin, Cytovillin, Villin-2, p81	-1.03171	-1.95654	-0.959898	0.109673	0.1-1.0%		CL0039	HUP	55	17	0.432466	P49915	GMPS	GMP synthase [glutamine-hydrolyzing], 6.3.5.2, GMP synthetase, Glutamine amidotransferase	-1.3874	-1.76815	-0.557576	0.276964	0.1-1.0%
CL0266	PH	89	20	0.500565	Q9NQW6	ANLN	Anillin	-2.45599	-3.14359	-0.965378	0.108298	0.1-1.0%		CL0039	HUP	55	17	0.432466	P54136	RARS1	Arginine--tRNA ligase, cytoplasmic, 6.1.1.19, Arginyl-tRNA synthetase, ArgRS	-1.35346	-2.10775	-0.800428	0.158333	0.1-1.0%
CL0266	PH	89	20	0.500565	Q9Y5B9	SUPT16H	FACT complex subunit SPT16, Chromatin-specific transcription elongation factor 140 kDa subunit, FACT 140 kDa subunit, FACTp140, Facilitates chromatin transcription complex subunit SPT16, hSPT16	-1.36412	-2.00472	-1.041	0.0909907	0.01-0.1%		CL0039	HUP	55	17	0.432466	P07814	EPRS1	Bifunctional glutamate/proline--tRNA ligase, Bifunctional aminoacyl-tRNA synthetase, Cell proliferation-inducing gene 32 protein, Glutamatyl-prolyl-tRNA synthetase, Glutamate--tRNA ligase, 6.1.1.17, Glutamyl-tRNA synthetase, GluRS, Proline--tRNA ligase, 6.1.1.15, Prolyl-tRNA synthetase	-0.957657	-1.84242	-0.969262	0.107334	0.1-1.0%
CL0266	PH	89	20	0.500565	P26038	MSN	Moesin, Membrane-organizing extension spike protein	-0.58601	-1.67826	-1.04432	0.0902986	0.01-0.1%		CL0039	HUP	55	17	0.432466	P26640	VARS1	Valine--tRNA ligase, 6.1.1.9, Protein G7a, Valyl-tRNA synthetase, ValRS	-1.18253	-2.04736	-1.01838	0.0958562	0.01-0.1%
CL0266	PH	89	20	0.500565	Q01082	SPTBN1	Spectrin beta chain, non-erythrocytic 1, Beta-II spectrin, Fodrin beta chain, Spectrin, non-erythroid beta chain 1	-1.25915	-2.32229	-1.06079	0.0869385	0.01-0.1%		CL0039	HUP	55	17	0.432466	Q9NSE4	IARS2	Isoleucine--tRNA ligase, mitochondrial, 6.1.1.5, Isoleucyl-tRNA synthetase, IleRS	-2.04096	-3.09883	-1.18666	0.0650634	0.01-0.1%
CL0266	PH	89	20	0.500565	Q9HD67	MYO10	Unconventional myosin-X, Unconventional myosin-10	-3.71827	-4.37218	-1.06277	0.0865429	0.01-0.1%		CL0039	HUP	55	17	0.432466	P54577	YARS1	Tyrosine--tRNA ligase, cytoplasmic, 6.1.1.1, Tyrosyl-tRNA synthetase, TyrRS	-1.34575	-2.63983	-1.32194	0.0476499	0.01-0.1%
CL0266	PH	89	20	0.500565	P35241	RDX	Radixin	-1.75974	-3.01411	-1.24359	0.0570707	0.01-0.1%		CL0039	HUP	55	17	0.432466	P41252	IARS1	Isoleucine--tRNA ligase, cytoplasmic, 6.1.1.5, Isoleucyl-tRNA synthetase, IRS, IleRS	-1.17988	-2.40659	-1.42155	0.0378832	0.01-0.1%
CL0266	PH	89	20	0.500565	Q66K14	TBC1D9B	TBC1 domain family member 9B	-3.44878	-4.16071	-1.34842	0.0448314	0.01-0.1%		CL0039	HUP	55	17	0.432466	Q9P2J5	LARS1	Leucine--tRNA ligase, cytoplasmic, 6.1.1.4, Leucyl-tRNA synthetase, LeuRS	-1.42684	-2.70919	-1.42468	0.0376116	0.01-0.1%
CL0266	PH	89	20	0.500565	Q12965	MYO1E	Unconventional myosin-Ie, Myosin-Ic, Unconventional myosin 1E	-1.64247	-2.88575	-1.36688	0.0429653	0.01-0.1%		CL0039	HUP	55	17	0.432466	Q15031	LARS2	Leucine--tRNA ligase, mitochondrial, 6.1.1.4, Leucyl-tRNA synthetase, LeuRS	-2.43344	-3.71319	-1.43524	0.0367075	0.01-0.1%
CL0266	PH	89	20	0.500565	O00159	MYO1C	Unconventional myosin-Ic, Myosin I beta, MMI-beta, MMIb	-1.65094	-3.49167	-2.10453	0.00786086	<0.01%		CL0039	HUP	55	17	0.432466	P56192	MARS1	Methionine--tRNA ligase, cytoplasmic, 6.1.1.10, Methionyl-tRNA synthetase, MetRS	-1.55033	-2.90906	-1.63203	0.023333	0.01-0.1%
CL0541	SH2-like	90	5	0.488527	Q7KZ85	SUPT6H	Transcription elongation factor SPT6, hSPT6, Histone chaperone suppressor of Ty6, Tat-cotransactivator 2 protein, Tat-CT2 protein	-2.15682	-1.97292	0.225931	1.6824	1.0-10.0%		CL0039	HUP	55	17	0.432466	P13804	ETFA	Electron transfer flavoprotein subunit alpha, mitochondrial, Alpha-ETF	-1.7481	-3.46765	-1.83961	0.0144674	0.01-0.1%
CL0541	SH2-like	90	5	0.488527	O15357	INPPL1	Phosphatidylinositol 3,4,5-trisphosphate 5-phosphatase 2, 3.1.3.86, Inositol polyphosphate phosphatase-like protein 1, INPPL-1, Protein 51C, SH2 domain-containing inositol 5'-phosphatase 2, SH2 domain-containing inositol phosphatase 2, SHIP-2	-2.69659	-2.83962	-0.249462	0.563039	0.1-1.0%		CL0039	HUP	55	17	0.432466	P23381	WARS1	Tryptophan--tRNA ligase, cytoplasmic, 6.1.1.2, Interferon-induced protein 53, IFP53, Tryptophanyl-tRNA synthetase, TrpRS, hWRS	-1.63697	-3.06623	-1.95986	0.0109682	0.01-0.1%
CL0541	SH2-like	90	5	0.488527	P40763	STAT3	Signal transducer and activator of transcription 3, Acute-phase response factor	-1.51957	-2.29147	-0.943827	0.113808	0.1-1.0%		CL0039	HUP	55	17	0.432466	P38117	ETFB	Electron transfer flavoprotein subunit beta, Beta-ETF	-1.65027	-3.55924	-2.0479	0.00895565	<0.01%
CL0541	SH2-like	90	5	0.488527	P42226	STAT6	Signal transducer and activator of transcription 6, IL-4 Stat	-2.73534	-3.83169	-1.23362	0.0583957	0.01-0.1%		CL0039	HUP	55	17	0.432466	P00966	ASS1	Argininosuccinate synthase, 6.3.4.5, Citrulline--aspartate ligase	-0.699828	-2.4727	-2.05683	0.00877339	<0.01%
CL0541	SH2-like	90	5	0.488527	P42224	STAT1	Signal transducer and activator of transcription 1-alpha/beta, Transcription factor ISGF-3 components p91/p84	-2.27123	-3.53016	-1.60231	0.0249855	0.01-0.1%		CL0159	E-set	56	9	0.426621	Q53EP0	FNDC3B	Fibronectin type III domain-containing protein 3B, Factor for adipocyte differentiation 104, HCV NS5A-binding protein 37	-3.54193	-3.32658	0.26106	1.82415	1.0-10.0%
CL0437	EF-G_C	91	4	0.488244	Q15029	EFTUD2	116 kDa U5 small nuclear ribonucleoprotein component, Elongation factor Tu GTP-binding domain-containing protein 2, SNU114 homolog, hSNU114, U5 snRNP-specific protein, 116 kDa, U5-116 kDa	-1.10422	-0.973399	0.160317	1.4465	1.0-10.0%		CL0159	E-set	56	9	0.426621	O75369	FLNB	Filamin-B, FLN-B, ABP-278, ABP-280 homolog, Actin-binding-like protein, Beta-filamin, Filamin homolog 1, Fh1, Filamin-3, Thyroid autoantigen, Truncated actin-binding protein, Truncated ABP	0.112246	0.152587	0.0300541	1.07165	1.0-10.0%
CL0437	EF-G_C	91	4	0.488244	Q9Y3A5	SBDS	Ribosome maturation protein SBDS, Shwachman-Bodian-Diamond syndrome protein	-1.49978	-2.1933	-0.607077	0.247129	0.1-1.0%		CL0159	E-set	56	9	0.426621	Q9Y2H6	FNDC3A	Fibronectin type-III domain-containing protein 3A, Human gene expressed in odontoblasts	-3.62542	-4.07059	-0.162947	0.687153	0.1-1.0%
CL0437	EF-G_C	91	4	0.488244	P13639	EEF2	Elongation factor 2, EF-2	-0.0138232	-0.760362	-0.753756	0.176297	0.1-1.0%		CL0159	E-set	56	9	0.426621	Q00653	NFKB2	Nuclear factor NF-kappa-B p100 subunit, DNA-binding factor KBF2, H2TF1, Lymphocyte translocation chromosome 10 protein, Nuclear factor of kappa light polypeptide gene enhancer in B-cells 2, Oncogene Lyt-10, Lyt10	-2.69152	-3.60307	-1.09858	0.0796935	0.01-0.1%
CL0437	EF-G_C	91	4	0.488244	Q96RP9	GFM1	Elongation factor G, mitochondrial, EF-Gmt, Elongation factor G 1, mitochondrial, mEF-G 1, Elongation factor G1, hEFG1	-1.89499	-2.82656	-1.08064	0.0830536	0.01-0.1%		CL0159	E-set	56	9	0.426621	P21333	FLNA	Filamin-A, FLN-A, Actin-binding protein 280, ABP-280, Alpha-filamin, Endothelial actin-binding protein, Filamin-1, Non-muscle filamin	-0.535264	-1.6262	-1.13951	0.0725248	0.01-0.1%
CL0006	C1	92	2	0.471519	Q9H0H5	RACGAP1	Rac GTPase-activating protein 1, Male germ cell RacGap, MgcRacGAP, Protein CYK4 homolog, CYK4, HsCYK-4	-2.47343	-2.36257	-0.0524092	0.88632	0.1-1.0%		CL0159	E-set	56	9	0.426621	O15344	MID1	E3 ubiquitin-protein ligase Midline-1, 2.3.2.27, Midin, Putative transcription factor XPRF, RING finger protein 59, RING finger protein Midline-1, RING-type E3 ubiquitin transferase Midline-1, Tripartite motif-containing protein 18	-3.1729	-4.22407	-1.20885	0.0618224	0.01-0.1%
CL0006	C1	92	2	0.471519	Q13501	SQSTM1	Sequestosome-1, EBI3-associated protein of 60 kDa, EBIAP, p60, Phosphotyrosine-independent ligand for the Lck SH2 domain of 62 kDa, Ubiquitin-binding protein p62	-1.83886	-2.93747	-1.24629	0.056717	0.01-0.1%		CL0159	E-set	56	9	0.426621	P02545	LMNA	Prelamin-A/C	-0.550681	-2.23538	-1.7441	0.0180259	0.01-0.1%
CL0022	LRR	93	8	0.470271	Q8N1G4	LRRC47	Leucine-rich repeat-containing protein 47	-2.07536	-1.76396	0.4044	2.53746	1.0-10.0%		CL0159	E-set	56	9	0.426621	P53618	COPB1	Coatomer subunit beta, Beta-coat protein, Beta-COP	-1.67313	-2.88583	-1.77824	0.0166633	0.01-0.1%
CL0022	LRR	93	8	0.470271	Q96AG4	LRRC59	Leucine-rich repeat-containing protein 59, Ribosome-binding protein p34, p34	-1.562	-1.98628	-0.323017	0.475317	0.1-1.0%		CL0159	E-set	56	9	0.426621	Q9Y678	COPG1	Coatomer subunit gamma-1, Gamma-1-coat protein, Gamma-1-COP	-1.60097	-3.24859	-2.10184	0.00790968	<0.01%
CL0022	LRR	93	8	0.470271	Q14160	SCRIB	Protein scribble homolog, Scribble, hScrib, Protein LAP4	-2.87948	-3.28604	-0.654079	0.221779	0.1-1.0%		CL0067	SIS	57	4	0.387896	P06744	GPI	Glucose-6-phosphate isomerase, GPI, 5.3.1.9, Autocrine motility factor, AMF, Neuroleukin, NLK, Phosphoglucose isomerase, PGI, Phosphohexose isomerase, PHI, Sperm antigen 36, SA-36	-0.832084	-0.684133	0.0516888	1.12639	1.0-10.0%
CL0022	LRR	93	8	0.470271	Q9H9A6	LRRC40	Leucine-rich repeat-containing protein 40	-1.96031	-2.45464	-0.690407	0.203983	0.1-1.0%		CL0067	SIS	57	4	0.387896	P08865	RPSA	40S ribosomal protein SA, 37 kDa laminin receptor precursor, 37LRP, 37/67 kDa laminin receptor, LRP/LR, 67 kDa laminin receptor, 67LR, Colon carcinoma laminin-binding protein, Laminin receptor 1, LamR, Laminin-binding protein precursor p40, LBP/p40, Multidrug resistance-associated protein MGr1-Ag, NEM/1CHD4, Small ribosomal subunit protein uS2	-1.19422	-1.7823	-0.510533	0.30865	0.1-1.0%
CL0022	LRR	93	8	0.470271	P00533	EGFR	Epidermal growth factor receptor, 2.7.10.1, Proto-oncogene c-ErbB-1, Receptor tyrosine-protein kinase erbB-1	-2.01767	-2.63776	-0.798329	0.1591	0.1-1.0%		CL0067	SIS	57	4	0.387896	Q9Y399	MRPS2	28S ribosomal protein S2, mitochondrial, MRP-S2, S2mt, Mitochondrial small ribosomal subunit protein uS2m	-2.40776	-3.26137	-0.999626	0.100086	0.1-1.0%
CL0022	LRR	93	8	0.470271	Q92688	ANP32B	Acidic leucine-rich nuclear phosphoprotein 32 family member B, Acidic protein rich in leucines, Putative HLA-DR-associated protein I-2, PHAPI2, Silver-stainable protein SSP29	-1.51854	-2.56489	-1.00566	0.0987054	0.01-0.1%		CL0067	SIS	57	4	0.387896	Q06210	GFPT1	Glutamine--fructose-6-phosphate aminotransferase [isomerizing] 1, 2.6.1.16, D-fructose-6-phosphate amidotransferase 1, Glutamine:fructose-6-phosphate amidotransferase 1, GFAT 1, GFAT1, Hexosephosphate aminotransferase 1	-1.65522	-3.11893	-1.78358	0.0164596	0.01-0.1%
CL0022	LRR	93	8	0.470271	P46060	RANGAP1	Ran GTPase-activating protein 1, RanGAP1	-1.65412	-3.05596	-1.3788	0.0418019	0.01-0.1%		CL0258	DALR	58	8	0.373019	Q96GW9	MARS2	Methionine--tRNA ligase, mitochondrial, 6.1.1.10, Methionyl-tRNA synthetase 2, Mitochondrial methionyl-tRNA synthetase, MtMetRS	-3.62218	-3.34168	0.403012	2.52937	1.0-10.0%
CL0022	LRR	93	8	0.470271	Q13045	FLII	Protein flightless-1 homolog	-1.83951	-3.20733	-1.61943	0.0240198	0.01-0.1%		CL0258	DALR	58	8	0.373019	P54136	RARS1	Arginine--tRNA ligase, cytoplasmic, 6.1.1.19, Arginyl-tRNA synthetase, ArgRS	-1.35346	-2.10775	-0.800428	0.158333	0.1-1.0%
CL0072	Ubiquitin	94	23	0.460989	Q15646	OASL	2'-5'-oligoadenylate synthase-like protein, 2'-5'-OAS-related protein, 2'-5'-OAS-RP, 59 kDa 2'-5'-oligoadenylate synthase-like protein, Thyroid receptor-interacting protein 14, TR-interacting protein 14, TRIP-14, p59 OASL, p59OASL	-3.48485	-3.10161	0.361729	2.30001	1.0-10.0%		CL0258	DALR	58	8	0.373019	P26640	VARS1	Valine--tRNA ligase, 6.1.1.9, Protein G7a, Valyl-tRNA synthetase, ValRS	-1.18253	-2.04736	-1.01838	0.0958562	0.01-0.1%
CL0072	Ubiquitin	94	23	0.460989	Q6IQ49	SDE2	Splicing regulator SDE2, Replication stress response regulator SDE2	-2.92075	-2.70563	0.310209	2.04272	1.0-10.0%		CL0258	DALR	58	8	0.373019	Q9NSE4	IARS2	Isoleucine--tRNA ligase, mitochondrial, 6.1.1.5, Isoleucyl-tRNA synthetase, IleRS	-2.04096	-3.09883	-1.18666	0.0650634	0.01-0.1%
CL0072	Ubiquitin	94	23	0.460989	Q15459	SF3A1	Splicing factor 3A subunit 1, SF3a120, Spliceosome-associated protein 114, SAP 114	-1.46139	-1.31213	0.17078	1.48177	1.0-10.0%		CL0258	DALR	58	8	0.373019	P41252	IARS1	Isoleucine--tRNA ligase, cytoplasmic, 6.1.1.5, Isoleucyl-tRNA synthetase, IRS, IleRS	-1.17988	-2.40659	-1.42155	0.0378832	0.01-0.1%
CL0072	Ubiquitin	94	23	0.460989	Q7Z6E9	RBBP6	E3 ubiquitin-protein ligase RBBP6, 2.3.2.27, Proliferation potential-related protein, Protein P2P-R, RING-type E3 ubiquitin transferase RBBP6, Retinoblastoma-binding Q protein 1, RBQ-1, Retinoblastoma-binding protein 6, p53-associated cellular protein of testis	-2.51264	-2.51925	0.0618295	1.153	1.0-10.0%		CL0258	DALR	58	8	0.373019	Q9P2J5	LARS1	Leucine--tRNA ligase, cytoplasmic, 6.1.1.4, Leucyl-tRNA synthetase, LeuRS	-1.42684	-2.70919	-1.42468	0.0376116	0.01-0.1%
CL0072	Ubiquitin	94	23	0.460989	Q9Y295	DRG1	Developmentally-regulated GTP-binding protein 1, DRG-1, Neural precursor cell expressed developmentally down-regulated protein 3, NEDD-3, Translation factor GTPase DRG1, TRAFAC GTPase DRG1, 3.6.5.-	-2.00748	-2.32567	-0.262942	0.545831	0.1-1.0%		CL0258	DALR	58	8	0.373019	Q15031	LARS2	Leucine--tRNA ligase, mitochondrial, 6.1.1.4, Leucyl-tRNA synthetase, LeuRS	-2.43344	-3.71319	-1.43524	0.0367075	0.01-0.1%
CL0072	Ubiquitin	94	23	0.460989	O00422	SAP18	Histone deacetylase complex subunit SAP18, 18 kDa Sin3-associated polypeptide, 2HOR0202, Cell growth-inhibiting gene 38 protein, Sin3-associated polypeptide p18	-1.93296	-2.36496	-0.330128	0.467597	0.1-1.0%		CL0258	DALR	58	8	0.373019	P56192	MARS1	Methionine--tRNA ligase, cytoplasmic, 6.1.1.10, Methionyl-tRNA synthetase, MetRS	-1.55033	-2.90906	-1.63203	0.023333	0.01-0.1%
CL0072	Ubiquitin	94	23	0.460989	Q96AC1	FERMT2	Fermitin family homolog 2, Kindlin-2, Mitogen-inducible gene 2 protein, MIG-2, Pleckstrin homology domain-containing family C member 1, PH domain-containing family C member 1	-1.72453	-1.87016	-0.343325	0.453602	0.1-1.0%		CL0364	Leu-IlvD	59	6	0.372893	P48200	IREB2	Iron-responsive element-binding protein 2, IRE-BP 2, Iron regulatory protein 2, IRP2	-3.72633	-3.60651	0.10053	1.26046	1.0-10.0%
CL0072	Ubiquitin	94	23	0.460989	P62979	RPS27A	Ubiquitin-40S ribosomal protein S27a, Ubiquitin carboxyl extension protein 80	-0.574283	-1.04055	-0.358288	0.43824	0.1-1.0%		CL0364	Leu-IlvD	59	6	0.372893	P27708	CAD	CAD protein, Glutamine-dependent carbamoyl-phosphate synthase, 6.3.5.5, Aspartate carbamoyltransferase, 2.1.3.2, Dihydroorotase, 3.5.2.3	-1.35296	-1.06691	-0.124934	0.750008	0.1-1.0%
CL0072	Ubiquitin	94	23	0.460989	Q70E73	RAPH1	Ras-associated and pleckstrin homology domains-containing protein 1, RAPH1, Amyotrophic lateral sclerosis 2 chromosomal region candidate gene 18 protein, Amyotrophic lateral sclerosis 2 chromosomal region candidate gene 9 protein, Lamellipodin, Proline-rich EVH1 ligand 2, PREL-2, Protein RMO1	-3.42707	-4.08825	-0.426393	0.374634	0.1-1.0%		CL0364	Leu-IlvD	59	6	0.372893	P21399	ACO1	Cytoplasmic aconitate hydratase, Aconitase, 4.2.1.3, Citrate hydro-lyase, Ferritin repressor protein, Iron regulatory protein 1, IRP1, Iron-responsive element-binding protein 1, IRE-BP 1	-2.00121	-2.93305	-1.02662	0.0940539	0.01-0.1%
CL0072	Ubiquitin	94	23	0.460989	P61956	SUMO2	Small ubiquitin-related modifier 2, SUMO-2, HSMT3, SMT3 homolog 2, SUMO-3, Sentrin-2, Ubiquitin-like protein SMT3B, Smt3B	-1.50134	-2.03056	-0.447417	0.35693	0.1-1.0%		CL0364	Leu-IlvD	59	6	0.372893	Q99798	ACO2	Aconitate hydratase, mitochondrial, Aconitase, 4.2.1.3, Citrate hydro-lyase	-1.85281	-2.90916	-1.21459	0.0610112	0.01-0.1%
CL0072	Ubiquitin	94	23	0.460989	Q9NTK5	OLA1	Obg-like ATPase 1, DNA damage-regulated overexpressed in cancer 45, DOC45, GTP-binding protein 9	-1.77493	-2.35971	-0.594481	0.254401	0.1-1.0%		CL0364	Leu-IlvD	59	6	0.372893	P31327	CPS1	Carbamoyl-phosphate synthase [ammonia], mitochondrial, 6.3.4.16, Carbamoyl-phosphate synthetase I, CPSase I	-0.590244	-1.73084	-1.31784	0.0481017	0.01-0.1%
CL0072	Ubiquitin	94	23	0.460989	P15311	EZR	Ezrin, Cytovillin, Villin-2, p81	-1.03171	-1.95654	-0.959898	0.109673	0.1-1.0%		CL0364	Leu-IlvD	59	6	0.372893	P02786	TFRC	Transferrin receptor protein 1, TR, TfR, TfR1, Trfr, T9, p90, CD71	-0.741527	-2.32716	-1.62482	0.0237236	0.01-0.1%
CL0072	Ubiquitin	94	23	0.460989	P26038	MSN	Moesin, Membrane-organizing extension spike protein	-0.58601	-1.67826	-1.04432	0.0902986	0.01-0.1%		CL0128	vWA-like	60	4	0.362252	P13010	XRCC5	X-ray repair cross-complementing protein 5, 3.6.4.-, 86 kDa subunit of Ku antigen, ATP-dependent DNA helicase 2 subunit 2, ATP-dependent DNA helicase II 80 kDa subunit, CTC box-binding factor 85 kDa subunit, CTC85, CTCBF, DNA repair protein XRCC5, Ku80, Ku86, Lupus Ku autoantigen protein p86, Nuclear factor IV, Thyroid-lupus autoantigen, TLAA, X-ray repair complementing defective repair in Chines…	-1.0495	-1.24245	-0.131679	0.73845	0.1-1.0%
CL0072	Ubiquitin	94	23	0.460989	Q9Y490	TLN1	Talin-1	-1.47192	-2.29149	-1.04869	0.0893934	0.01-0.1%		CL0128	vWA-like	60	4	0.362252	P12956	XRCC6	X-ray repair cross-complementing protein 6, 3.6.4.-, 4.2.99.-, 5'-deoxyribose-5-phosphate lyase Ku70, 5'-dRP lyase Ku70, 70 kDa subunit of Ku antigen, ATP-dependent DNA helicase 2 subunit 1, ATP-dependent DNA helicase II 70 kDa subunit, CTC box-binding factor 75 kDa subunit, CTC75, CTCBF, DNA repair protein XRCC6, Lupus Ku autoantigen protein p70, Ku70, Thyroid-lupus autoantigen, TLAA, X-ray repa…	-1.07232	-1.37506	-0.2349	0.582238	0.1-1.0%
CL0072	Ubiquitin	94	23	0.460989	Q9HD67	MYO10	Unconventional myosin-X, Unconventional myosin-10	-3.71827	-4.37218	-1.06277	0.0865429	0.01-0.1%		CL0128	vWA-like	60	4	0.362252	P05556	ITGB1	Integrin beta-1, Fibronectin receptor subunit beta, Glycoprotein IIa, GPIIA, VLA-4 subunit beta, CD29	-1.46676	-2.19246	-0.928926	0.117781	0.1-1.0%
CL0072	Ubiquitin	94	23	0.460989	Q93009	USP7	Ubiquitin carboxyl-terminal hydrolase 7, 3.4.19.12, Deubiquitinating enzyme 7, Herpesvirus-associated ubiquitin-specific protease, Ubiquitin thioesterase 7, Ubiquitin-specific-processing protease 7	-1.83666	-2.92513	-1.0763	0.0838883	0.01-0.1%		CL0128	vWA-like	60	4	0.362252	Q15437	SEC23B	Protein transport protein Sec23B, hSec23B, SEC23-related protein B	-2.13331	-3.95201	-1.97711	0.0105411	0.01-0.1%
CL0072	Ubiquitin	94	23	0.460989	Q96T88	UHRF1	E3 ubiquitin-protein ligase UHRF1, 2.3.2.27, Inverted CCAAT box-binding protein of 90 kDa, Nuclear protein 95, Nuclear zinc finger protein Np95, HuNp95, hNp95, RING finger protein 106, RING-type E3 ubiquitin transferase UHRF1, Transcription factor ICBP90, Ubiquitin-like PHD and RING finger domain-containing protein 1, hUHRF1, Ubiquitin-like-containing PHD and RING finger domains protein 1	-2.00224	-3.2404	-1.16141	0.0689581	0.01-0.1%		CL0188	CH	61	13	0.325076	Q8WXH0	SYNE2	Nesprin-2, KASH domain-containing protein 2, KASH2, Nuclear envelope spectrin repeat protein 2, Nucleus and actin connecting element protein, Protein NUANCE, Synaptic nuclear envelope protein 2, Syne-2	-2.74945	-2.55831	0.161778	1.45137	1.0-10.0%
CL0072	Ubiquitin	94	23	0.460989	P35241	RDX	Radixin	-1.75974	-3.01411	-1.24359	0.0570707	0.01-0.1%		CL0188	CH	61	13	0.325076	O75369	FLNB	Filamin-B, FLN-B, ABP-278, ABP-280 homolog, Actin-binding-like protein, Beta-filamin, Filamin homolog 1, Fh1, Filamin-3, Thyroid autoantigen, Truncated actin-binding protein, Truncated ABP	0.112246	0.152587	0.0300541	1.07165	1.0-10.0%
CL0072	Ubiquitin	94	23	0.460989	Q13501	SQSTM1	Sequestosome-1, EBI3-associated protein of 60 kDa, EBIAP, p60, Phosphotyrosine-independent ligand for the Lck SH2 domain of 62 kDa, Ubiquitin-binding protein p62	-1.83886	-2.93747	-1.24629	0.056717	0.01-0.1%		CL0188	CH	61	13	0.325076	Q03001	DST	Dystonin, 230 kDa bullous pemphigoid antigen, 230/240 kDa bullous pemphigoid antigen, Bullous pemphigoid antigen 1, BPA, Bullous pemphigoid antigen, Dystonia musculorum protein, Hemidesmosomal plaque protein	-3.03494	-3.32739	-0.361233	0.435278	0.1-1.0%
CL0072	Ubiquitin	94	23	0.460989	P26639	TARS1	Threonine--tRNA ligase 1, cytoplasmic, 6.1.1.3, Threonyl-tRNA synthetase, ThrRS, Threonyl-tRNA synthetase 1	-0.829107	-2.24175	-1.40932	0.0389659	0.01-0.1%		CL0188	CH	61	13	0.325076	Q9UPN3	MACF1	Microtubule-actin cross-linking factor 1, isoforms 1/2/3/4/5, 620 kDa actin-binding protein, ABP620, Actin cross-linking family protein 7, Macrophin-1, Trabeculin-alpha	-2.35615	-2.73032	-0.43783	0.364897	0.1-1.0%
CL0072	Ubiquitin	94	23	0.460989	P55039	DRG2	Developmentally-regulated GTP-binding protein 2, DRG-2, Translation factor GTPase DRG2, TRAFAC GTPase DRG2, 3.6.5.-	-2.07513	-3.38523	-1.42419	0.0376535	0.01-0.1%		CL0188	CH	61	13	0.325076	Q15149	PLEC	Plectin, PCN, PLTN, Hemidesmosomal protein 1, HD1, Plectin-1	-0.592997	-1.01685	-0.456401	0.349622	0.1-1.0%
CL0072	Ubiquitin	94	23	0.460989	Q9NZJ4	SACS	Sacsin, DnaJ homolog subfamily C member 29, DNAJC29	-2.49549	-4.46617	-2.01642	0.00962905	<0.01%		CL0188	CH	61	13	0.325076	Q15691	MAPRE1	Microtubule-associated protein RP/EB family member 1, APC-binding protein EB1, End-binding protein 1, EB1	-1.95298	-2.80073	-0.739255	0.182283	0.1-1.0%
CL0072	Ubiquitin	94	23	0.460989	Q8TAT6	NPLOC4	Nuclear protein localization protein 4 homolog, Protein NPL4	-2.12324	-3.74627	-2.28159	0.0052289	<0.01%		CL0188	CH	61	13	0.325076	Q99439	CNN2	Calponin-2, Calponin H2, smooth muscle, Neutral calponin	-2.02913	-3.08532	-0.947659	0.112808	0.1-1.0%
CL0257	Acetyltrans	95	2	0.447676	P30419	NMT1	Glycylpeptide N-tetradecanoyltransferase 1, 2.3.1.97, Myristoyl-CoA:protein N-myristoyltransferase 1, HsNMT1, NMT 1, Type I N-myristoyltransferase, Peptide N-myristoyltransferase 1, Protein-lysine myristoyltransferase NMT1, 2.3.1.-	-1.96313	-2.14441	-0.0931814	0.806898	0.1-1.0%		CL0188	CH	61	13	0.325076	Q01082	SPTBN1	Spectrin beta chain, non-erythrocytic 1, Beta-II spectrin, Fodrin beta chain, Spectrin, non-erythroid beta chain 1	-1.25915	-2.32229	-1.06079	0.0869385	0.01-0.1%
CL0257	Acetyltrans	95	2	0.447676	Q9H0A0	NAT10	RNA cytidine acetyltransferase, 2.3.1.-, 18S rRNA cytosine acetyltransferase, N-acetyltransferase 10, N-acetyltransferase-like protein, hALP	-1.4432	-2.0694	-1.05328	0.0884545	0.01-0.1%		CL0188	CH	61	13	0.325076	P21333	FLNA	Filamin-A, FLN-A, Actin-binding protein 280, ABP-280, Alpha-filamin, Endothelial actin-binding protein, Filamin-1, Non-muscle filamin	-0.535264	-1.6262	-1.13951	0.0725248	0.01-0.1%
CL0039	HUP	96	17	0.432466	Q13057	COASY	Bifunctional coenzyme A synthase, CoA synthase, NBP, POV-2, Phosphopantetheine adenylyltransferase, 2.7.7.3, Dephospho-CoA pyrophosphorylase, Pantetheine-phosphate adenylyltransferase, PPAT, Dephospho-CoA kinase, DPCK, 2.7.1.24, Dephosphocoenzyme A kinase, DPCOAK	-1.85127	-1.3986	0.524167	3.34324	1.0-10.0%		CL0188	CH	61	13	0.325076	P13797	PLS3	Plastin-3, T-plastin	-1.38957	-2.44212	-1.36583	0.0430693	0.01-0.1%
CL0039	HUP	96	17	0.432466	Q96GW9	MARS2	Methionine--tRNA ligase, mitochondrial, 6.1.1.10, Methionyl-tRNA synthetase 2, Mitochondrial methionyl-tRNA synthetase, MtMetRS	-3.62218	-3.34168	0.403012	2.52937	1.0-10.0%		CL0188	CH	61	13	0.325076	P37802	TAGLN2	Transgelin-2, Epididymis tissue protein Li 7e, SM22-alpha homolog	-1.18454	-2.81051	-1.58535	0.0259808	0.01-0.1%
CL0039	HUP	96	17	0.432466	Q9Y2Z4	YARS2	Tyrosine--tRNA ligase, mitochondrial, 6.1.1.1, Tyrosyl-tRNA synthetase, TyrRS	-1.96242	-2.18402	-0.260097	0.549418	0.1-1.0%		CL0188	CH	61	13	0.325076	P46940	IQGAP1	Ras GTPase-activating-like protein IQGAP1, p195	-1.0252	-2.4941	-1.6449	0.0226516	0.01-0.1%
CL0039	HUP	96	17	0.432466	P49915	GMPS	GMP synthase [glutamine-hydrolyzing], 6.3.5.2, GMP synthetase, Glutamine amidotransferase	-1.3874	-1.76815	-0.557576	0.276964	0.1-1.0%		CL0188	CH	61	13	0.325076	O43707	ACTN4	Alpha-actinin-4, Non-muscle alpha-actinin 4	-0.921858	-2.39801	-2.16049	0.00691054	<0.01%
CL0039	HUP	96	17	0.432466	P54136	RARS1	Arginine--tRNA ligase, cytoplasmic, 6.1.1.19, Arginyl-tRNA synthetase, ArgRS	-1.35346	-2.10775	-0.800428	0.158333	0.1-1.0%		CL0600	S15_NS1	62	6	0.306416	P82914	MRPS15	28S ribosomal protein S15, mitochondrial, MRP-S15, S15mt, Mitochondrial small ribosomal subunit protein uS15m	-2.86401	-2.75298	0.163012	1.4555	1.0-10.0%
CL0039	HUP	96	17	0.432466	P07814	EPRS1	Bifunctional glutamate/proline--tRNA ligase, Bifunctional aminoacyl-tRNA synthetase, Cell proliferation-inducing gene 32 protein, Glutamatyl-prolyl-tRNA synthetase, Glutamate--tRNA ligase, 6.1.1.17, Glutamyl-tRNA synthetase, GluRS, Proline--tRNA ligase, 6.1.1.15, Prolyl-tRNA synthetase	-0.957657	-1.84242	-0.969262	0.107334	0.1-1.0%		CL0600	S15_NS1	62	6	0.306416	P62277	RPS13	40S ribosomal protein S13, Small ribosomal subunit protein uS15	-0.800972	-1.52152	-0.651616	0.223041	0.1-1.0%
CL0039	HUP	96	17	0.432466	P26640	VARS1	Valine--tRNA ligase, 6.1.1.9, Protein G7a, Valyl-tRNA synthetase, ValRS	-1.18253	-2.04736	-1.01838	0.0958562	0.01-0.1%		CL0600	S15_NS1	62	6	0.306416	P07814	EPRS1	Bifunctional glutamate/proline--tRNA ligase, Bifunctional aminoacyl-tRNA synthetase, Cell proliferation-inducing gene 32 protein, Glutamatyl-prolyl-tRNA synthetase, Glutamate--tRNA ligase, 6.1.1.17, Glutamyl-tRNA synthetase, GluRS, Proline--tRNA ligase, 6.1.1.15, Prolyl-tRNA synthetase	-0.957657	-1.84242	-0.969262	0.107334	0.1-1.0%
CL0039	HUP	96	17	0.432466	Q9NSE4	IARS2	Isoleucine--tRNA ligase, mitochondrial, 6.1.1.5, Isoleucyl-tRNA synthetase, IleRS	-2.04096	-3.09883	-1.18666	0.0650634	0.01-0.1%		CL0600	S15_NS1	62	6	0.306416	P56192	MARS1	Methionine--tRNA ligase, cytoplasmic, 6.1.1.10, Methionyl-tRNA synthetase, MetRS	-1.55033	-2.90906	-1.63203	0.023333	0.01-0.1%
CL0039	HUP	96	17	0.432466	P54577	YARS1	Tyrosine--tRNA ligase, cytoplasmic, 6.1.1.1, Tyrosyl-tRNA synthetase, TyrRS	-1.34575	-2.63983	-1.32194	0.0476499	0.01-0.1%		CL0600	S15_NS1	62	6	0.306416	P41250	GARS1	Glycine--tRNA ligase, 6.1.1.14, Diadenosine tetraphosphate synthetase, Ap4A synthetase, 2.7.7.-, Glycyl-tRNA synthetase, GlyRS, Glycyl-tRNA synthetase 1	-1.34537	-2.79976	-1.73703	0.0183218	0.01-0.1%
CL0039	HUP	96	17	0.432466	P41252	IARS1	Isoleucine--tRNA ligase, cytoplasmic, 6.1.1.5, Isoleucyl-tRNA synthetase, IRS, IleRS	-1.17988	-2.40659	-1.42155	0.0378832	0.01-0.1%		CL0600	S15_NS1	62	6	0.306416	P23381	WARS1	Tryptophan--tRNA ligase, cytoplasmic, 6.1.1.2, Interferon-induced protein 53, IFP53, Tryptophanyl-tRNA synthetase, TrpRS, hWRS	-1.63697	-3.06623	-1.95986	0.0109682	0.01-0.1%
CL0039	HUP	96	17	0.432466	Q9P2J5	LARS1	Leucine--tRNA ligase, cytoplasmic, 6.1.1.4, Leucyl-tRNA synthetase, LeuRS	-1.42684	-2.70919	-1.42468	0.0376116	0.01-0.1%		CL0671	AAA_lid	63	6	0.29682	Q9Y4W6	AFG3L2	AFG3-like protein 2, 3.4.24.-, Paraplegin-like protein	-2.10194	-2.04808	0.0274583	1.06527	1.0-10.0%
CL0039	HUP	96	17	0.432466	Q15031	LARS2	Leucine--tRNA ligase, mitochondrial, 6.1.1.4, Leucyl-tRNA synthetase, LeuRS	-2.43344	-3.71319	-1.43524	0.0367075	0.01-0.1%		CL0671	AAA_lid	63	6	0.29682	Q9NU22	MDN1	Midasin, Dynein-related AAA-ATPase MDN1, MIDAS-containing protein	-2.83948	-2.82195	-0.212443	0.613136	0.1-1.0%
CL0039	HUP	96	17	0.432466	P56192	MARS1	Methionine--tRNA ligase, cytoplasmic, 6.1.1.10, Methionyl-tRNA synthetase, MetRS	-1.55033	-2.90906	-1.63203	0.023333	0.01-0.1%		CL0671	AAA_lid	63	6	0.29682	Q14204	DYNC1H1	Cytoplasmic dynein 1 heavy chain 1, Cytoplasmic dynein heavy chain 1, Dynein heavy chain, cytosolic	-1.02476	-2.01314	-1.20314	0.0626407	0.01-0.1%
CL0039	HUP	96	17	0.432466	P13804	ETFA	Electron transfer flavoprotein subunit alpha, mitochondrial, Alpha-ETF	-1.7481	-3.46765	-1.83961	0.0144674	0.01-0.1%		CL0671	AAA_lid	63	6	0.29682	P25205	MCM3	DNA replication licensing factor MCM3, 3.6.4.12, DNA polymerase alpha holoenzyme-associated protein P1, P1-MCM3, RLF subunit beta, p102	-1.44871	-2.82228	-1.5847	0.0260197	0.01-0.1%
CL0039	HUP	96	17	0.432466	P23381	WARS1	Tryptophan--tRNA ligase, cytoplasmic, 6.1.1.2, Interferon-induced protein 53, IFP53, Tryptophanyl-tRNA synthetase, TrpRS, hWRS	-1.63697	-3.06623	-1.95986	0.0109682	0.01-0.1%		CL0671	AAA_lid	63	6	0.29682	P55072	VCP	Transitional endoplasmic reticulum ATPase, TER ATPase, 3.6.4.6, 15S Mg(2+)-ATPase p97 subunit, Valosin-containing protein, VCP	-0.930731	-2.37985	-2.1258	0.00748507	<0.01%
CL0039	HUP	96	17	0.432466	P38117	ETFB	Electron transfer flavoprotein subunit beta, Beta-ETF	-1.65027	-3.55924	-2.0479	0.00895565	<0.01%		CL0671	AAA_lid	63	6	0.29682	Q9Y230	RUVBL2	RuvB-like 2, 3.6.4.12, 48 kDa TATA box-binding protein-interacting protein, 48 kDa TBP-interacting protein, 51 kDa erythrocyte cytosolic protein, ECP-51, INO80 complex subunit J, Repressing pontin 52, Reptin 52, TIP49b, TIP60-associated protein 54-beta, TAP54-beta	-1.37346	-3.19297	-2.19591	0.0063693	<0.01%
CL0039	HUP	96	17	0.432466	P00966	ASS1	Argininosuccinate synthase, 6.3.4.5, Citrulline--aspartate ligase	-0.699828	-2.4727	-2.05683	0.00877339	<0.01%		CL0392	Chaperone-J	64	6	0.294806	Q9UGP8	SEC63	Translocation protein SEC63 homolog	-2.10505	-2.33498	-0.173007	0.671418	0.1-1.0%
CL0159	E-set	97	9	0.426621	Q53EP0	FNDC3B	Fibronectin type III domain-containing protein 3B, Factor for adipocyte differentiation 104, HCV NS5A-binding protein 37	-3.54193	-3.32658	0.26106	1.82415	1.0-10.0%		CL0392	Chaperone-J	64	6	0.294806	Q5F1R6	DNAJC21	DnaJ homolog subfamily C member 21, DnaJ homolog subfamily A member 5, Protein GS3	-2.74792	-3.10352	-0.251797	0.560019	0.1-1.0%
CL0159	E-set	97	9	0.426621	O75369	FLNB	Filamin-B, FLN-B, ABP-278, ABP-280 homolog, Actin-binding-like protein, Beta-filamin, Filamin homolog 1, Fh1, Filamin-3, Thyroid autoantigen, Truncated actin-binding protein, Truncated ABP	0.112246	0.152587	0.0300541	1.07165	1.0-10.0%		CL0392	Chaperone-J	64	6	0.294806	Q99543	DNAJC2	DnaJ homolog subfamily C member 2, M-phase phosphoprotein 11, Zuotin-related factor 1	-2.23899	-2.67128	-0.389763	0.407603	0.1-1.0%
CL0159	E-set	97	9	0.426621	Q9Y2H6	FNDC3A	Fibronectin type-III domain-containing protein 3A, Human gene expressed in odontoblasts	-3.62542	-4.07059	-0.162947	0.687153	0.1-1.0%		CL0392	Chaperone-J	64	6	0.294806	Q8WXX5	DNAJC9	DnaJ homolog subfamily C member 9, HDJC9, DnaJ protein SB73	-2.14366	-3.35379	-1.13968	0.0724974	0.01-0.1%
CL0159	E-set	97	9	0.426621	Q00653	NFKB2	Nuclear factor NF-kappa-B p100 subunit, DNA-binding factor KBF2, H2TF1, Lymphocyte translocation chromosome 10 protein, Nuclear factor of kappa light polypeptide gene enhancer in B-cells 2, Oncogene Lyt-10, Lyt10	-2.69152	-3.60307	-1.09858	0.0796935	0.01-0.1%		CL0392	Chaperone-J	64	6	0.294806	P31689	DNAJA1	DnaJ homolog subfamily A member 1, DnaJ protein homolog 2, HSDJ, Heat shock 40 kDa protein 4, Heat shock protein J2, HSJ-2, Human DnaJ protein 2, hDj-2	-1.28124	-2.61775	-1.37003	0.0426548	0.01-0.1%
CL0159	E-set	97	9	0.426621	P21333	FLNA	Filamin-A, FLN-A, Actin-binding protein 280, ABP-280, Alpha-filamin, Endothelial actin-binding protein, Filamin-1, Non-muscle filamin	-0.535264	-1.6262	-1.13951	0.0725248	0.01-0.1%		CL0392	Chaperone-J	64	6	0.294806	O75165	DNAJC13	DnaJ homolog subfamily C member 13, Required for receptor-mediated endocytosis 8, RME-8	-2.95039	-4.43612	-1.83432	0.0146448	0.01-0.1%
CL0159	E-set	97	9	0.426621	O15344	MID1	E3 ubiquitin-protein ligase Midline-1, 2.3.2.27, Midin, Putative transcription factor XPRF, RING finger protein 59, RING finger protein Midline-1, RING-type E3 ubiquitin transferase Midline-1, Tripartite motif-containing protein 18	-3.1729	-4.22407	-1.20885	0.0618224	0.01-0.1%		CL0652	S24e_L23_L15e	65	3	0.285902	P62081	RPS7	40S ribosomal protein S7, Small ribosomal subunit protein eS7	-0.810636	-1.05188	-0.140697	0.723274	0.1-1.0%
CL0159	E-set	97	9	0.426621	P02545	LMNA	Prelamin-A/C	-0.550681	-2.23538	-1.7441	0.0180259	0.01-0.1%		CL0652	S24e_L23_L15e	65	3	0.285902	P61313	RPL15	60S ribosomal protein L15, Large ribosomal subunit protein eL15	-0.890443	-1.92686	-0.963303	0.108817	0.1-1.0%
CL0159	E-set	97	9	0.426621	P53618	COPB1	Coatomer subunit beta, Beta-coat protein, Beta-COP	-1.67313	-2.88583	-1.77824	0.0166633	0.01-0.1%		CL0652	S24e_L23_L15e	65	3	0.285902	P62913	RPL11	60S ribosomal protein L11, CLL-associated antigen KW-12, Large ribosomal subunit protein uL5	-0.893673	-2.21177	-1.59152	0.0256143	0.01-0.1%
CL0159	E-set	97	9	0.426621	Q9Y678	COPG1	Coatomer subunit gamma-1, Gamma-1-coat protein, Gamma-1-COP	-1.60097	-3.24859	-2.10184	0.00790968	<0.01%		CL0409	GAP	66	4	0.277578	Q9H0H5	RACGAP1	Rac GTPase-activating protein 1, Male germ cell RacGap, MgcRacGAP, Protein CYK4 homolog, CYK4, HsCYK-4	-2.47343	-2.36257	-0.0524092	0.88632	0.1-1.0%
CL0081	MBD-like	98	1	0.417368	O95243	MBD4	Methyl-CpG-binding domain protein 4, 3.2.2.-, Methyl-CpG-binding endonuclease 1, Methyl-CpG-binding protein MBD4, Mismatch-specific DNA N-glycosylase	-3.77157	-4.27041	-0.37948	0.417368	0.1-1.0%		CL0409	GAP	66	4	0.277578	P21359	NF1	Neurofibromin, Neurofibromatosis-related protein NF-1	-3.48677	-4.23165	-0.735774	0.183749	0.1-1.0%
CL0067	SIS	99	4	0.387896	P06744	GPI	Glucose-6-phosphate isomerase, GPI, 5.3.1.9, Autocrine motility factor, AMF, Neuroleukin, NLK, Phosphoglucose isomerase, PGI, Phosphohexose isomerase, PHI, Sperm antigen 36, SA-36	-0.832084	-0.684133	0.0516888	1.12639	1.0-10.0%		CL0409	GAP	66	4	0.277578	P46940	IQGAP1	Ras GTPase-activating-like protein IQGAP1, p195	-1.0252	-2.4941	-1.6449	0.0226516	0.01-0.1%
[truncated: 308 more rows]
[truncated: 318 more columns]
