# Supplementary material
Source: HighWire-hosted journal article supplement (doi:10.1101/rna.079848.123)
Supplement: Supplemental_Table_S4.xlsx [file Supplemental_Table_S4.xlsx]

## Sheet: Supplemental Table S4
Supplemental Table S4
All solutions were made in 1X TBST (20.0 mM Tris, 150.0 mM NaCl, 0.1% (w/v) Tween-20 detergent), primary antibody solutions contained an additional 0.02% (m/v) NaN3.
Primary antibody incubation steps for all antibodies were performed overnight (16+ hours) on an orbital shaker at 4 ˚C.
Blocking steps for all antibodies were performed on an orbital rocker at room temperature.
Secondary antibodies were obtained from SeraCare (5450-0010, rabbit; 5450-0011, mouse) and diluted 1:10,000 in 2.5% milk 1X TBST, incubated on an orbital shakerr for 1 hour at room temperature.
Four 5 minute washes with 1X TBST on orbital shaker at room temperature were performed following primary and secondary antibody incubation steps.
Target name for correspond to the label in figure panels.
Target	Catalog #, manufacturer	Blocking conditions	Primary antibody conditions	Antibody type	Lot #; clone	Assigned UniProt ID	Primary gene name	Protein name
RPS3	A4872, ABclonal	5.0% milk, 1 hour	5.0% milk (1:2,000)	Rabbit monoclonal	4000000302; ARC0302	P23396	RPS3	40S ribosomal protein S3, 4.2.99.18, Small ribosomal subunit protein uS3
SND1	A5874, ABclonal	5.0% milk, 1 hour	5.0% milk (1:2,000)	Rabbit polyclonal	0029220201; n/a	Q7KZF4	SND1	Staphylococcal nuclease domain-containing protein 1, 3.1.31.1, 100 kDa coactivator, EBNA2 coactivator p100, Tudor domain-containing protein 11, p100 co-activator
UPF1	A5071, ABclonal	5.0% milk, 1 hour	5.0% milk (1:2,000)	Rabbit monoclonal	4000001268; ARC1268	Q92900	UPF1	Regulator of nonsense transcripts 1, 3.6.4.12, 3.6.4.13, ATP-dependent helicase RENT1, Nonsense mRNA reducing factor 1, NORF1, Up-frameshift suppressor 1 homolog, hUpf1
HDLBP	A20896, ABclonal	5.0% milk, 1 hour	5.0% milk (1:2,000)	Rabbit monoclonal	4000002855; ARC2855	Q00341	HDLBP	Vigilin, High density lipoprotein-binding protein, HDL-binding protein
ABCF3	A15168, ABclonal	5.0% milk, 1 hour	5.0% milk (1:2,000)	Rabbit polyclonal	0127370101; n/a	Q9NUQ8	ABCF3	ATP-binding cassette sub-family F member 3
GEMIN5	A17125, ABclonal	5.0% milk, 1 hour	5.0% milk (1:2,000)	Rabbit polyclonal	0111800101; n/a	Q8TEQ6	GEMIN5	Gem-associated protein 5, Gemin5
eEF2	A9721, ABclonal	5.0% milk, 1 hour	5.0% milk (1:2,000)	Rabbit monoclonal	4000001717; ARC1717	P13639	EEF2	Elongation factor 2, EF-2
CELF1	A5958, ABclonal	5.0% milk, 1 hour	5.0% milk (1:2,000)	Rabbit polyclonal	0202600301; n/a	Q92879	CELF1	CUGBP Elav-like family member 1, CELF-1, 50 kDa nuclear polyadenylated RNA-binding protein, Bruno-like protein 2, CUG triplet repeat RNA-binding protein 1, CUG-BP1, CUG-BP- and ETR-3-like factor 1, Deadenylation factor CUG-BP, Embryo deadenylation element-binding protein homolog, EDEN-BP homolog, RNA-binding protein BRUNOL-2
FBL	A1136, ABclonal	5.0% milk, 1 hour	5.0% milk (1:2,000)	Rabbit polyclonal	0002110201; n/a	P22087	FBL	rRNA 2'-O-methyltransferase fibrillarin, 2.1.1.-, 34 kDa nucleolar scleroderma antigen, Histone-glutamine methyltransferase, U6 snRNA 2'-O-methyltransferase fibrillarin
HNRNPD	A15679, ABclonal	5.0% milk, 1 hour	5.0% milk (1:2,000)	Rabbit polyclonal	0073750101; n/a	Q14103	HNRNPD	Heterogeneous nuclear ribonucleoprotein D0, hnRNP D0, AU-rich element RNA-binding protein 1
RanBP2	27606-1-AP, ProteinTech/ptglab)	5.0% milk, 1 hour	5.0% milk (1:2,000)	Rabbit polyclonal	00080421; n/a	P49792	RANBP2	E3 SUMO-protein ligase RanBP2, 2.3.2.-, 358 kDa nucleoporin, Nuclear pore complex protein Nup358, Nucleoporin Nup358, Ran-binding protein 2, RanBP2, p270
PDIA3	A4376, ABclonal	5.0% milk, 1 hour	5.0% milk (1:2,000)	Rabbit monoclonal	4000000987; ARC0987	P30101	PDIA3	Protein disulfide-isomerase A3, 5.3.4.1, 58 kDa glucose-regulated protein, 58 kDa microsomal protein, p58, Disulfide isomerase ER-60, Endoplasmic reticulum resident protein 57, ER protein 57, ERp57, Endoplasmic reticulum resident protein 60, ER protein 60, ERp60
