# Supplementary material
Source: HighWire-hosted journal article supplement (doi:10.1101/rna.079848.123)
Supplement: Supplemental_Table_S5.xlsx [file Supplemental_Table_S5.xlsx]

## Sheet: Supplemental Table S5
Supplemental Table S5
Protein lists were exported from PANTHER V17.0 (Thomas et al., 2003) and proteins were assigned UniProt IDs as described in Supplemental Table S2.
RNA binding (GO:0003723)	Ribosomal (PC00202)	Chaperone (PC00072)	Mitochondrion (GO:0005739)	Cytosol (GO:0005829)	Fatty acid metabolic process (GO:0006631)	Glycolysis (P00024)	Dehydrogenase (PC00092)	Pyruvate metabolism (P02772)	Nucleotide binding (GO:0000166)	Endoplasmic reticulum membrane (GO:0005789)	Endoplasmic reticulum lumen (GO:0005788)	Integral component of membrane (GO:0016021)
Q9Y6Y8	Q9Y6G3	Q9Y6X1	Q9Y6N5	Q9Y6Y8	A0A024RD35	P04406	Q9Y394	P29803	Q9Y6X9	Q9Y6X1	Q9Y6F9	W5XKT8
Q9Y6V7	Q9Y676	Q9Y6N1	Q9Y6N1	Q9Y6Y1	A0A087X1C5	P15259	Q9Y2S2	O75390	Q9Y6X6	Q9Y6K0	Q9Y680	U3KPV4
Q9Y6M1	Q9Y3U8	Q9Y680	Q9Y6M9	Q9Y6Y0	A0A0U1RQF0	Q2TB90	Q9ULD0	P08559	Q9Y6V7	Q9Y6I9	Q9Y4L1	Q9Y6Y9
Q9Y6K5	Q9Y3D9	Q9Y536	Q9Y6J8	Q9Y6X9	A1L3X0	P06733	Q9UL12	P11498	Q9Y6T7	Q9Y6G1	Q9UNY4	Q9Y6X5
Q9Y6G9	Q9Y3D5	Q9Y4L1	Q9Y6H3	Q9Y6X8	A1LV06	Q8N0Y7	Q9UKU7	P12694	Q9Y6S9	Q9Y6F6	Q9UNW1	Q9Y6X1
Q9Y6G3	Q9Y3D3	Q9Y3C6	Q9Y6H1	Q9Y6X6	B0YJ81	P17858	Q9UI17	P14618	Q9Y6R4	Q9Y6D0	Q9UNA0	Q9Y6W8
Q9Y6A4	Q9Y3B7	Q9Y2R0	Q9Y6G3	Q9Y6X1	O00154	P19367	Q9UHQ1	P30613	Q9Y6N5	Q9Y6B6	Q9UMD9	Q9Y6V0
Q9Y623	Q9Y399	Q9Y2G8	Q9Y6G1	Q9Y6X0	O00519	P00558	Q9UDR5	P35558	Q9Y6M4	Q9Y6A9	Q9UM21	Q9Y6U7
Q9Y606	Q9Y2R9	Q9Y244	Q9Y6E7	Q9Y6W6	O14684	P08237	Q9UBQ7	P40926	Q9Y6K8	Q9Y6A2	Q9UKP4	Q9Y6R1
Q9Y5S9	Q9Y2R5	Q9UNP9	Q9Y6C9	Q9Y6W5	O14734	P07738	Q9P0J0	P48163	Q9Y6K5	Q9Y6A1	Q9UK55	Q9Y6Q6
Q9Y5K5	Q9Y2Q9	Q9UL15	Q9Y697	Q9Y6W3	O15254	P52789	Q9NZC7	P53396	Q9Y6G9	Q9Y679	Q9UBU3	Q9Y6N8
Q9Y5J1	Q9Y291	Q9UKB3	Q9Y696	Q9Y6T7	O15296	P09972	Q9NZ01	Q8N0X4	Q9Y6E7	Q9Y678	Q9UBS4	Q9Y6N7
Q9Y5G4	Q9UNX3	Q9UIM3	Q9Y676	Q9Y6Q9	O60488	P18669	Q9NYR8		Q9Y6E0	Q9Y673	Q9UBS3	Q9Y6N3
Q9Y5B9	Q9ULI2	Q9UHV9	Q9Y619	Q9Y6Q6	O75342	P30613	Q9NXC2		Q9Y6B6	Q9Y672	Q9UBR2	Q9Y6N1
Q9Y5A9	Q9UHA3	Q9UF47	Q9Y606	Q9Y6Q5	O95573	P14618	Q9HBH5		Q9Y689	Q9Y5Z9	Q9P2K2	Q9Y6M9
Q9Y580	Q9P0M9	Q9UDY4	Q9Y5Z9	Q9Y6P5	P04083	P60174	Q9H9P8		Q9Y623	Q9Y5Y5	Q9P218	Q9Y6M7
Q9Y570	Q9P0J6	Q9UDT6	Q9Y5Z4	Q9Y6N9	P07099	P09104	Q9H845		Q9Y620	Q9Y5U9	Q9NZ08	Q9Y6M5
Q9Y534	Q9P015	Q9UBS4	Q9Y5Y0	Q9Y6M1	P07108	P04075	Q9H6Q4		Q9Y616	Q9Y5U4	Q9NYU2	Q9Y6L6
Q9Y520	Q9NZE8	Q9UBS3	Q9Y5U8	Q9Y6K9	P08910	P06744	Q9H2A2		Q9Y5Y2	Q9Y5Q0	Q9NYU1	Q9Y6K0
Q9Y4Z0	Q9NX24	Q9NZN9	Q9Y5T4	Q9Y6K8	P09110	P05062	Q9BYZ2		Q9Y5S8	Q9Y5P4	Q9NXH8	Q9Y6J6
Q9Y4Y9	Q9NX20	Q9NZD4	Q9Y5R4	Q9Y6K5	P09917		Q9BUT1		Q9Y5S2	Q9Y5M8	Q9NWW5	Q9Y6I9
Q9Y4W2	Q9NWU5	Q9NYJ1	Q9Y5P4	Q9Y6J0	P0C7M7		Q9BTZ2		Q9Y5P6	Q9Y5L3	Q9NWM8	Q9Y6I8
Q9Y4P3	Q9NVS2	Q9NXH8	Q9Y5L4	Q9Y6I9	P10635		Q9BPW9		Q9Y5M8	Q9Y5K3	Q9NRM1	Q9Y6H8
Q9Y4I1	Q9NV31	Q9NWM8	Q9Y5J9	Q9Y6I8	P16050		Q99643		Q9Y5L3	Q9Y4P3	Q9NRA1	Q9Y6H6
Q9Y4F3	Q9NRX2	Q9NVM6	Q9Y5J7	Q9Y6I7	P17516		Q96NR8		Q9Y5K1	Q9Y3R0	Q9NQ76	Q9Y6G3
Q9Y4C8	Q9NQC7	Q9NVH1	Q9Y5J6	Q9Y6I3	P18054		Q96LJ7		Q9Y5B8	Q9Y3Q3	Q9NPF7	Q9Y6G1
Q9Y4B5	Q9NQ50	Q9NVA1	Q9Y584	Q9Y6H5	P23219		Q96LI9		Q9Y572	Q9Y3I0	Q9NP70	Q9Y6F6
Q9Y421	Q9NQ39	Q9NPJ1	Q9Y512	Q9Y6H3	P23786		Q96HY7		Q9Y4W6	Q9Y3B6	Q9HCN8	Q9Y6D0
Q9Y3Z3	Q9NP92	Q9H7H0	Q9Y4X0	Q9Y6G9	P24752		Q96EY8		Q9Y4U1	Q9Y3B3	Q9HCE9	Q9Y6C9
Q9Y3Y2	Q9HD33	Q9H497	Q9Y4W6	Q9Y6E0	P28288		Q96CU9		Q9Y4R7	Q9Y3A6	Q9HCB6	Q9Y6C5
Q9Y3X0	Q9H2W6	Q9H3Z4	Q9Y4P1	Q9Y6D9	P28330		Q92947		Q9Y4L1	Q9Y397	Q9H8M9	Q9Y6C2
Q9Y3U8	Q9H1X1	Q9H2H8	Q9Y4E8	Q9Y6D6	P30084		Q92781		Q9Y4K4	Q9Y394	Q9H497	Q9Y6A9
Q9Y3T9	Q9H0U6	Q9H1K1	Q9Y3M8	Q9Y6D5	P33121		Q8WWV3		Q9Y4I1	Q9Y385	Q9H1J7	Q9Y6A2
Q9Y3I0	Q9BZE1	Q9GZY4	Q9Y3I1	Q9Y6B7	P33897		Q8TC12		Q9Y4G8	Q9Y320	Q9H173	Q9Y6A1
Q9Y3F4	Q9BYN8	Q9BUE6	Q9Y3E5	Q9Y6B6	P35354		Q8NEX9		Q9Y4C4	Q9Y2Y6	Q9GZV9	Q9Y698
Q9Y3D9	Q9BYD6	Q9BTW9	Q9Y3E2	Q9Y6A5	P35558		Q8NCR3		Q9Y4B6	Q9Y2P5	Q9GZP0	Q9Y696
Q9Y3D5	Q9BYD3	Q9BT73	Q9Y3D9	Q9Y698	P38398		Q8NCN5		Q9Y4B4	Q9Y2G8	Q9BZQ6	Q9Y694
Q9Y3C1	Q9BYD2	Q9BRT2	Q9Y3D7	Q9Y697	P40939		Q8NBQ5		Q9Y496	Q9Y2G5	Q9BYF1	Q9Y693
Q9Y3B7	Q9BYD1	Q9BQA9	Q9Y3D6	Q9Y696	P42126		Q8N5I4		Q9Y463	Q9Y2G1	Q9BXS0	Q9Y691
Q9Y3B4	Q9BYC9	Q99933	Q9Y3D5	Q9Y678	P42765		Q8N465		Q9Y450	Q9Y2B2	Q9BV94	Q9Y679
Q9Y3B2	Q9BYC8	Q99832	Q9Y3D3	Q9Y657	P49753		Q8N3Y7		Q9Y3Z3	Q9Y284	Q9BU40	Q9Y673
Q9Y3A5	Q9BRJ2	Q99615	Q9Y3D2	Q9Y617	P50416		Q8N335		Q9Y3Y2	Q9Y282	Q9BTY2	Q9Y672
Q9Y3A4	Q9BQC6	Q99543	Q9Y3B8	Q9Y613	P52895		Q8N2H3		Q9Y3S1	Q9Y256	Q9BTV4	Q9Y666
Q9Y3A2	Q9BQ48	Q99471	Q9Y3B7	Q9Y5Z7	P53396		Q8IZV5		Q9Y3Q4	Q9UQF2	Q9BT09	Q9Y663
Q9Y388	Q96L21	Q99426	Q9Y3B1	Q9Y5Y5	P55084		Q8IZ83		Q9Y3L5	Q9UPQ8	Q9BS26	Q9Y662
Q9Y383	Q96GC5	Q96SF2	Q9Y3A0	Q9Y5Y2	Q04828		Q8IWW8		Q9Y3I0	Q9UP65	Q9BRK3	Q9Y661
Q9Y333	Q96EL3	Q96LL9	Q9Y399	Q9Y5X9	Q08426		Q86WU2		Q9Y3D8	Q9UNU6	Q99715	Q9Y653
Q9Y324	Q96EL2	Q96L12	Q9Y375	Q9Y5X3	Q08AH1		Q7Z5P4		Q9Y385	Q9UNN5	Q99217	Q9Y644
Q9Y314	Q96EH5	Q96KC8	Q9Y371	Q9Y5X2	Q08AH3		Q7Z5J1		Q9Y2Z9	Q9UNL2	Q96SL4	Q9Y639
Q9Y2Z4	Q96A35	Q96JJ7	Q9Y320	Q9Y5X1	Q13825		Q709F0		Q9Y2Z4	Q9UMX3	Q96S16	Q9Y624
Q9Y2Z2	Q969Q0	Q96I36	Q9Y305	Q9Y5W7	Q14032		Q6ZMR3		Q9Y2Z2	Q9UMS5	Q96P44	Q9Y619
Q9Y2X3	Q92901	Q96EY1	Q9Y2Z9	Q9Y5V3	Q14693		Q6YN16		Q9Y2X8	Q9UM47	Q96L12	Q9Y618
Q9Y2W6	Q92665	Q96DZ5	Q9Y2Z4	Q9Y5S9	Q14914		Q6PKH6		Q9Y2W1	Q9UM00	Q96JH7	Q9Y5Z9
Q9Y2W2	Q92552	Q96DN0	Q9Y2Z2	Q9Y5S2	Q15067		Q6JQN1		Q9Y2U5	Q9ULS5	Q96HE7	Q9Y5Z6
Q9Y2W1	Q8TD47	Q96BP3	Q9Y2Y0	Q9Y5R8	Q15185		Q6IAN0		Q9Y2S2	Q9ULP0	Q96EG1	Q9Y5Z0
Q9Y2V2	Q8TCC3	Q96A04	Q9Y2X7	Q9Y5P8	Q16647		Q5TF58		Q9Y2R4	Q9ULC5	Q96DZ1	Q9Y5Y9
Q9Y2T7	Q8NHW5	Q969U7	Q9Y2W6	Q9Y5P4	Q16698		Q5I0G3		Q9Y2Q0	Q9UL25	Q96DN0	Q9Y5Y7
Q9Y2R9	Q8N983	Q92623	Q9Y2S7	Q9Y5N6	Q16822		Q5HYJ1		Q9Y2P5	Q9UL01	Q96D15	Q9Y5Y6
Q9Y2R5	Q8N5N7	Q92598	Q9Y2R9	Q9Y5N5	Q16836		Q3SY69		Q9Y2P4	Q9UKY4	Q96AY3	Q9Y5Y5
Q9Y2R4	Q8N5C6	Q92526	Q9Y2R5	Q9Y5L2	Q3I5F7		Q3SXM5		Q9Y2K3	Q9UKV5	Q96AD5	Q9Y5Y4
Q9Y2Q9	Q8IXN7	Q8WXX5	Q9Y2R0	Q9Y5K8	Q4G176		Q3B7J2		Q9Y2K2	Q9UKU0	Q96A83	Q9Y5Y3
Q9Y2L1	Q8IXM3	Q8WXU2	Q9Y2Q9	Q9Y5K5	Q53FZ2		Q13423		Q9Y2I7	Q9UKR5	Q969H8	Q9Y5Y0
Q9Y2K5	Q86TS9	Q8WW22	Q9Y2Q3	Q9Y5B8	Q5HYJ1		Q13268		Q9Y2H9	Q9UKM7	Q92781	Q9Y5X5
Q9Y2H6	Q7Z7H8	Q8WUA2	Q9Y2N7	Q9Y5B6	Q5R387		Q12882		Q9Y2H1	Q9UJG1	Q92538	Q9Y5W8
Q9Y285	Q7Z7F7	Q8NHS0	Q9Y2D0	Q9Y5A9	Q5T8D3		Q0D2I5		Q9Y2G3	Q9UIJ5	Q8WXD2	Q9Y5W7
Q9Y262	Q7Z2W9	Q8NBS9	Q9Y2C4	Q9Y5A7	Q5VWC8		Q08426		Q9Y295	Q9UHQ9	Q8WWX9	Q9Y5U9
Q9Y237	Q71UM5	Q8N9W5	Q9Y291	Q9Y592	Q68CK6		Q02338		Q9Y287	Q9UHQ4	Q8WU39	Q9Y5U8
Q9Y235	Q6P5R6	Q8N807	Q9Y277	Q9Y577	Q6NUN0		Q02252		Q9Y285	Q9UHJ9	Q8TED1	Q9Y5U5
Q9Y224	Q6P1L8	Q8N7S2	Q9Y276	Q9Y576	Q6P1M0		Q02218		Q9Y277	Q9UHF3	Q8TAV3	Q9Y5U4
Q9Y221	Q6P161	Q8N6R1	Q9Y267	Q9Y575	Q6P461		Q02127		Q9Y276	Q9UHE5	Q8NG11	Q9Y5T4
Q9WJR5	Q6DKI1	Q8N6N2	Q9Y255	Q9Y574	Q6Y1H2		Q00796		Q9Y272	Q9UGP8	Q8NFW1	Q9Y5S8
Q9UQG0	Q5T653	Q8N5M4	Q9Y241	Q9Y572	Q6ZUV0		P80365		Q9Y265	Q9UEU0	Q8NEV9	Q9Y5S1
Q9UQ80	Q5JNZ5	Q8N5M1	Q9Y237	Q9Y566	Q86TX2		P54886		Q9Y259	Q9UDX4	Q8NBS9	Q9Y5R2
Q9UQ35	Q59GN2	Q8N4W6	Q9Y234	Q9Y535	Q86YB7		P53004		Q9Y243	Q9UBY8	Q8NBP7	Q9Y5Q9
Q9UPY3	Q4U2R6	Q8N3C7	Q9Y228	Q9Y520	Q8IVS2		P52209		Q9Y239	Q9UBV2	Q8NBL1	Q9Y5Q5
Q9UPU9	Q16540	Q8N2E6	Q9UQM7	Q9Y508	Q8N5D0		P51649		Q9Y233	Q9UBU6	Q8NBK3	Q9Y5Q0
Q9UPT8	Q15050	Q8N183	Q9UQF2	Q9Y4Z0	Q8N6N7		P51648		Q9Y230	Q9UBS9	Q8NBJ7	Q9Y5P1
Q9UPS6	Q14137	Q8IXY8	Q9UQ90	Q9Y4Y9	Q8N8N7		P51553		Q9Y227	Q9UBS5	Q8NBJ5	Q9Y5P0
Q9UPR6	Q13405	Q8IXB1	Q9UPW5	Q9Y4X5	Q8N9L9		P50213		Q9Y223	Q9UBS3	Q8NBJ4	Q9Y5N1
Q9UPR3	Q13084	Q8IWL3	Q9UPV9	Q9Y4X4	Q8NC06		P49748		Q9UQM7	Q9UBQ6	Q8N6G6	Q9Y5M8
Q9UPQ9	Q07020	Q86Y56	Q9UP65	Q9Y4W2	Q8TCG5		P49448		Q9UQE7	Q9UBP0	Q8N4F0	Q9Y5L3
Q9UPN6	Q02878	Q86WW8	Q9UNQ0	Q9Y4U1	Q8WU67		P49419		Q9UQD0	Q9UBM7	Q8N2E6	Q9Y5L2
Q9UPN3	Q02543	Q86SE8	Q9UMY1	Q9Y4R8	Q92523		P49189		Q9UQB9	Q9UBM1	Q8N114	Q9Y5J1
Q9UNX4	P84098	Q7Z6W7	Q9UMX5	Q9Y4R7	Q92539		P48735		Q9UQ90	Q9UBF8	Q8IZC6	Q9Y5I7
Q9UNX3	P83881	Q7Z412	Q9UMX3	Q9Y4P8	Q96CM8		P48448		Q9UQ88	Q9UBF2	Q8IYK4	Q9Y5I4
Q9UNW9	P83731	Q7L3B6	Q9UMS0	Q9Y4P1	Q96JK2		P47895		Q9UQ16	Q9P2X0	Q8IXL6	Q9Y5I3
Q9UNQ2	P82933	Q7KZN9	Q9ULZ3	Q9Y4L5	Q96SE0		P45954		Q9UQ10	Q9P2W9	Q8IXB1	Q9Y5I2
Q9UNP9	P82932	Q719I0	Q9ULZ2	Q9Y4K4	Q99424		P43353		Q9UQ07	Q9P2W7	Q8IWF2	Q9Y5I1
Q9UN86	P82930	Q6Y2X3	Q9ULX9	Q9Y4K3	Q9BQK8		P43304		Q9UPZ9	Q9P2V4	Q8IVL5	Q9Y5I0
Q9UN81	P82921	Q6UX04	Q9ULP0	Q9Y4I1	Q9BV79		P40926		Q9UPY3	Q9P2K9	Q86YB8	Q9Y5H9
Q9UMY1	P82914	Q6UW78	Q9ULD2	Q9Y4H2	Q9BW60		P40925		Q9UPQ3	Q9P2G3	Q86Y22	Q9Y5H8
Q9UMR2	P82912	Q6P3W2	Q9ULD0	Q9Y4G8	Q9BWD1		P40394		Q9UPE1	Q9P2E9	Q86UP2	Q9Y5H7
Q9ULX6	P82909	Q5VVH2	Q9ULC8	Q9Y4F1	Q9BYJ1		P37059		Q9UP95	Q9P2B2	Q86UF1	Q9Y5H6
Q9ULW3	P82675	Q5VUM1	Q9ULC5	Q9Y4E8	Q9GZR5		P31937		Q9UNY4	Q9P299	Q86TD4	Q9Y5H5
Q9ULR0	P82673	Q5U5X0	Q9UL15	Q9Y4E1	Q9HB03		P31213		Q9UNT1	Q9P246	Q7Z4N8	Q9Y5H4
Q9ULM6	P82664	Q5TC12	Q9UL12	Q9Y4D1	Q9NP80		P31040		Q9UNQ0	Q9P241	Q7Z4H8	Q9Y5H3
Q9ULC4	P82663	Q5QJ74	Q9UKU7	Q9Y4C5	Q9NR71		P30838		Q9UN81	Q9P0S3	Q76LX8	Q9Y5H2
Q9UL40	P82650	Q5JTJ3	Q9UKU0	Q9Y496	Q9NTX5		P30837		Q9UN37	Q9P0N8	Q6UY14	Q9Y5H1
Q9UL18	P63220	Q5JS54	Q9UKQ2	Q9Y490	Q9NUZ1		P30038		Q9UMR2	Q9P0L0	Q6UX39	Q9Y5H0
Q9UKV8	P63173	Q5F1R6	Q9UKN8	Q9Y484	Q9NWU1		P29803		Q9UM73	Q9P0I2	Q6UWY0	Q9Y5G9
Q9UKV3	P62917	Q58FG1	Q9UKL3	Q9Y478	Q9NXB9		P28845		Q9UM54	Q9P055	Q6UWW8	Q9Y5G8
Q9UKM9	P62913	Q58FF8	Q9UKA2	Q9Y473	Q9NZ01		P28332		Q9ULX5	Q9P035	Q6UW63	Q9Y5G7
Q9UKK9	P62910	Q58FF7	Q9UK39	Q9Y450	Q9P035		P28331		Q9ULW5	Q9P003	Q6Q788	Q9Y5G6
Q9UKJ3	P62906	Q58FF6	Q9UK32	Q9Y426	Q9UBJ2		P28330		Q9ULV0	Q9NZV5	Q6PCB0	Q9Y5G5
Q9UKF6	P62899	Q58FF3	Q9UJZ1	Q9Y3U8	Q9UJ83		P26440		Q9ULJ3	Q9NZU1	Q6P988	Q9Y5G4
Q9UKD2	P62891	Q49B96	Q9UJS0	Q9Y3T9	Q9UKU0		P23378		Q9ULI4	Q9NZU0	Q6P179	Q9Y5G3
Q9UKA9	P62888	Q16543	Q9UJA2	Q9Y3S1			P21953		Q9ULI2	Q9NZS9	Q5TAT6	Q9Y5G2
Q9UKA8	P62857	Q16082	Q9UJ68	Q9Y3R5			P21912		Q9ULI0	Q9NZJ5	Q5T4B2	Q9Y5G1
Q9UK61	P62854	Q15814	Q9UIJ7	Q9Y3R4			P21695		Q9ULG1	Q9NZ56	Q5NDL2	Q9Y5G0
Q9UK59	P62851	Q15813	Q9UII2	Q9Y3R0			P20839		Q9ULC5	Q9NZ43	Q5JRA6	Q9Y5F9
Q9UK45	P62847	Q15526	Q9UIF7	Q9Y3P9			P19404		Q9ULC3	Q9NZ42	Q5FYB1	Q9Y5F8
Q9UK39	P62841	Q15185	Q9UI43	Q9Y3M8			P18405		Q9UL54	Q9NZ08	Q5FYB0	Q9Y5F7
Q9UJV9	P62829	Q15084	Q9UI32	Q9Y3M2			P16219		Q9UL51	Q9NZ01	Q5FYA8	Q9Y5F6
Q9UJV8	P62753	Q15006	Q9UI17	Q9Y3L5			P15428		Q9UL26	Q9NYL5	Q32P28	Q9Y5F3
Q9UJJ7	P62750	Q14568	Q9UI09	Q9Y3L3			P14061		Q9UL25	Q9NYK1	Q2UY09	Q9Y5F2
Q9UJA5	P62701	Q14554	Q9UHV9	Q9Y3I1			P12694		Q9UL16	Q9NY26	Q24JP5	Q9Y5F1
Q9UIV1	P62424	Q14318	Q9UHQ9	Q9Y3I0			P12268		Q9UL15	Q9NXW2	Q17RW2	Q9Y5F0
Q9UII4	P62280	Q14203	Q9UHN1	Q9Y3F4			P11766		Q9UKX3	Q9NXI6	Q16270	Q9Y5E9
Q9UIF9	P62277	Q14061	Q9UHK6	Q9Y3E7			P11413		Q9UKX2	Q9NXG6	Q15465	Q9Y5E8
Q9UI17	P62273	Q13526	Q9UH62	Q9Y3E5			P11310		Q9UKU7	Q9NXE4	Q15293	Q9Y5E7
Q9UHX1	P62269	Q13451	Q9UGM6	Q9Y3E2			P11177		Q9UKU0	Q9NXB9	Q15084	Q9Y5E6
Q9UHL0	P62266	Q13427	Q9UGC7	Q9Y3E1			P0CG22		Q9UKN7	Q9NX47	Q14993	Q9Y5E5
Q9UHK0	P62263	Q13356	Q9UG56	Q9Y3E0			P08559		Q9UKI8	Q9NWW5	Q14766	Q9Y5E4
Q9UHI6	P62249	Q13087	Q9UFN0	Q9Y3D6			P08319		Q9UKE5	Q9NVV0	Q14703	Q9Y5E3
Q9UHC7	P62244	Q12931	Q9UF12	Q9Y3D3			P07864		Q9UK32	Q9NV64	Q14697	Q9Y5E2
Q9UHB9	P62241	Q0VDF9	Q9UDX5	Q9Y3D2			P07327		Q9UJW2	Q9NUV7	Q14554	Q9Y5E1
Q9UH17	P62081	Q08752	Q9UDW1	Q9Y3D0			P07195		Q9UJV9	Q9NUU6	Q14515	Q9Y585
Q9UGY1	P61927	Q02790	Q9UDR5	Q9Y3C4			P05091		Q9UJT1	Q9NUQ2	Q14393	Q9Y584
Q9UGU0	P61353	Q00688	Q9UBZ4	Q9Y3B2			P04406		Q9UJT0	Q9NUN7	Q14257	Q9Y561
Q9UGR2	P61313	P78371	Q9UBY8	Q9Y3A5			P03886		Q9UJM8	Q9NUN5	Q14213	Q9Y548
Q9UGP8	P61254	P78318	Q9UBX3	Q9Y3A3			P00367		Q9UJA3	Q9NUD9	Q14118	Q9Y519
Q9UGI8	P61247	P68106	Q9UBS5	Q9Y397			P00352		Q9UJ83	Q9NTN3	Q14055	Q9Y512
Q9UFF9	P60866	P62942	Q9UBM1	Q9Y376			P00338		Q9UJ70	Q9NTJ5	Q14050	Q9Y4W6
Q9UBV8	P55769	P62937	Q9UBF8	Q9Y375			P00326		Q9UIS9	Q9NSU2	Q14031	Q9Y4P3
Q9UBU9	P52815	P61758	Q9P2R7	Q9Y371			P00325		Q9UIL4	Q9NST1	Q13438	Q9Y4K3
Q9UBQ5	P51398	P61604	Q9P2J9	Q9Y365			O95479		Q9UIK4	Q9NRZ7	Q13421	Q9Y4G8
Q9UBP6	P50914	P59910	Q9P2E3	Q9Y337			O95167		Q9UIJ7	Q9NRZ5	Q13316	Q9Y4E5
Q9UBK2	P49406	P54652	Q9P298	Q9Y333			O95139		Q9UIG0	Q9NRX5	Q13217	Q9Y4D8
Q9UBB5	P49207	P51948	Q9P291	Q9Y316			O94788		Q9UHY1	Q9NRR5	Q13103	Q9Y4D7
Q9P2P1	P47914	P50991	Q9P286	Q9Y315			O75911		Q9UHW5	Q9NRP0	Q13087	Q9Y4D2
Q9P2N5	P46783	P50990	Q9P1Q0	Q9Y314			O75891		Q9UHQ9	Q9NRJ1	Q13061	Q9Y4C5
Q9P2K8	P46782	P49368	Q9P0U1	Q9Y303			O75874		Q9UHL0	Q9NR97	Q12841	Q9Y4C0
Q9P2K5	P46781	P49321	Q9P0S9	Q9Y2Z4			O75489		Q9UHJ6	Q9NR96	Q12797	Q9Y4A9
Q9P2I0	P46779	P48741	Q9P0S2	Q9Y2Z2			O75452		Q9UHI6	Q9NR63	Q08431	Q9Y493
Q9P2E9	P46778	P48723	Q9P0P8	Q9Y2Z0			O75438		Q9UHH9	Q9NQW1	Q07092	Q9Y487
Q9P2E3	P46777	P48643	Q9P0M9	Q9Y2Y1			O75251		Q9UHG3	Q9NQR9	Q07065	Q9Y450
Q9P287	P46776	P46379	Q9P0J6	Q9Y2Y0			O60701		Q9UHD8	Q9NQC3	Q06481	Q9Y442
Q9P275	P42766	P45877	Q9P0J1	Q9Y2X7			O43920		Q9UHD2	Q9NQ38	Q05707	Q9Y426
Q9P272	P42677	P40227	Q9P0J0	Q9Y2X3			O43837		Q9UHD1	Q9NPH5	Q03692	Q9Y3Q7
Q9P258	P40429	P38646	Q9P032	Q9Y2W7			O43175		Q9UHC1	Q9NPG8	Q03405	Q9Y3Q4
Q9P127	P39023	P34932	Q9P015	Q9Y2W2			O14756		Q9UHB4	Q9NPA0	Q02818	Q9Y3Q3
Q9P0P8	P39019	P34931	Q9P013	Q9Y2V2			O14556		Q9UH65	Q9NP80	Q02388	Q9Y3Q0
Q9P0M9	P36578	P31689	Q9NZJ7	Q9Y2U5			A6ND91		Q9UH03	Q9NP78	Q01955	Q9Y3P9
Q9P031	P35268	P30622	Q9NZJ6	Q9Y2T4			A0PJE2		Q9UGM6	Q9NP73	Q01740	Q9Y3P8
Q9P015	P32969	P30533	Q9NZJ4	Q9Y2T3					Q9UGJ0	Q9NP72	P78536	Q9Y3P4
Q9P013	P30050	P30414	Q9NZE8	Q9Y2T1					Q9UGI9	Q9NP58	P62079	Q9Y3N9
Q9NZM5	P27635	P30405	Q9NZC7	Q9Y2S2					Q9UG63	Q9HDC5	P61769	Q9Y3E5
Q9NZJ9	P26373	P30101	Q9NZ45	Q9Y2Q3					Q9UG22	Q9HD20	P56817	Q9Y3E0
Q9NZI8	P25398	P27824	Q9NZ42	Q9Y2Q0					Q9UFH2	Q9HCU5	P56706	Q9Y3D6
Q9NZB2	P23396	P27797	Q9NYZ2	Q9Y2N7					Q9UFC0	Q9HCS2	P56705	Q9Y3B6
Q9NZ63	P22090	P25686	Q9NYY8	Q9Y2M5					Q9UF33	Q9HCP6	P56704	Q9Y3B3
Q9NYY8	P18621	P25685	Q9NYK5	Q9Y2M0					Q9UF12	Q9HCG7	P56703	Q9Y3A6
Q9NYL2	P18124	P23284	Q9NYJ1	Q9Y2L5					Q9UEW8	Q9HC10	P55268	Q9Y397
Q9NYK5	P18077	P17987	Q9NXF1	Q9Y2L1					Q9UEE5	Q9HBI6	P55157	Q9Y385
Q9NYK1	P15880	P17066	Q9NXA8	Q9Y2K6					Q9UDX4	Q9HBH5	P55145	Q9Y375
Q9NYH9	P09001	P14625	Q9NX63	Q9Y2K3					Q9UBT2	Q9HBF4	P54793	Q9Y345
Q9NYF8	P08865	P13667	Q9NX47	Q9Y2J8					Q9UBS0	Q9HB55	P53634	Q9Y342
Q9NY93	P08708	P11142	Q9NX46	Q9Y2J4					Q9UBQ7	Q9HB03	P53420	Q9Y336
Q9NY61	P05388	P11021	Q9NX20	Q9Y2J2					Q9UBP0	Q9HAW9	P51690	Q9Y328
Q9NY30	P05387	P0DN37	Q9NX18	Q9Y2J0					Q9UBM7	Q9HAW8	P51689	Q9Y320
Q9NY12	P05386	P0DN26	Q9NX14	Q9Y2I9					Q9UBL9	Q9HAW7	P51654	Q9Y316
Q9NXZ2	O76021	P0DMV9	Q9NX09	Q9Y2I7					Q9UBK8	Q9HAT1	P50454	Q9Y2Y6
Q9NXV6	O75394	P0DMV8	Q9NX00	Q9Y2I6					Q9UBK7	Q9HAS3	P41221	Q9Y2W7
Q9NXL6	O60783	P08238	Q9NWX6	Q9Y2I1					Q9UBJ2	Q9HA82	P39060	Q9Y2W6
Q9NXH9	O15235	P07900	Q9NWU5	Q9Y2H6					Q9UBF8	Q9H9S3	P39059	Q9Y2W3
Q9NXG2	H7C0U6	P07237	Q9NWU1	Q9Y2H1					Q9UBE8	Q9H9P2	P36888	Q9Y2U8
Q9NX74	A6NKH3	P06748	Q9NWT8	Q9Y2G2					Q9UBC5	Q9H920	P35555	Q9Y2U2
Q9NX58		P05408	Q9NWS8	Q9Y2G1					Q9UBB5	Q9H902	P35354	Q9Y2T6
Q9NX24		P04792	Q9NWR8	Q9Y2G0					Q9P2R7	Q9H8Y8	P34741	Q9Y2T5
Q9NX20		P02511	Q9NWQ9	Q9Y2F9					Q9P2P6	Q9H8X9	P31415	Q9Y2R0
Q9NX07		P02489	Q9NWH2	Q9Y2E6					Q9P2K8	Q9H8P0	P30533	Q9Y2Q0
Q9NX05		O95817	Q9NWB6	Q9Y2D1					Q9P2J5	Q9H8M9	P30101	Q9Y2P5
Q9NWX6		O95816	Q9NVV4	Q9Y2B5					Q9P2E2	Q9H819	P30040	Q9Y2P4
Q9NWU5		O95757	Q9NVT9	Q9Y2A7					Q9P2D7	Q9H6U8	P29460	Q9Y2J2
Q9NWH9		O95456	Q9NVS2	Q9Y297					Q9P2D1	Q9H6R6	P29459	Q9Y2H6
Q9NWB1		O95433	Q9NVI7	Q9Y296					Q9P289	Q9H6L5	P29400	Q9Y2H2
Q9NW64		O95429	Q9NVH6	Q9Y295					Q9P286	Q9H6H4	P28482	Q9Y2G8
Q9NW13		O75953	Q9NVH1	Q9Y285					Q9P241	Q9H6F2	P27918	Q9Y2G3
Q9NVV4		O75937	Q9NVH0	Q9Y284					Q9P225	Q9H5K3	P27824	Q9Y2G1
Q9NVS2		O75607	Q9NVA1	Q9Y266					Q9P1Z3	Q9H553	P27797	Q9Y2E8
Q9NVP1		O75347	Q9NV92	Q9Y265					Q9P1Z0	Q9H4L5	P27658	Q9Y2D2
Q9NVN8		O75344	Q9NUT2	Q9Y262					Q9P1W9	Q9H4D0	P25940	Q9Y2C9
Q9NVM6		O75190	Q9NUQ9	Q9Y259					Q9P1U1	Q9H490	P25067	Q9Y2C5
Q9NV31		O75165	Q9NUQ2	Q9Y256					Q9P0Z9	Q9H3S5	P24821	Q9Y2C4
Q9NV06		O60925	Q9NUM3	Q9Y253					Q9P0V9	Q9H3N1	P24593	Q9Y2C3
Q9NUU7		O60884	Q9NUL7	Q9Y244					Q9P0M2	Q9H3H5	P23560	Q9Y2C2
Q9NUQ6		O60683	Q9NUJ1	Q9Y239					Q9P0L2	Q9H313	P23327	Q9Y2B2
Q9NUL7		O43447	Q9NUH8	Q9Y238					Q9P0J6	Q9H306	P23284	Q9Y2B1
Q9NUL5		O15260	Q9NUB1	Q9Y233					Q9P0J0	Q9H2M9	P23141	Q9Y2A9
Q9NUL3		O14967	Q9NU23	Q9Y230					Q9NZQ0	Q9H2F3	P22891	Q9Y2A7
Q9NUK0		O14657	Q9NTK1	Q9Y224					Q9NZN4	Q9H2C2	P22692	Q9Y289
Q9NUD5		O14656	Q9NTG7	Q9Y223					Q9NZN3	Q9H295	P20908	Q9Y287
Q9NTZ6		O14558	Q9NSK7	Q9Y222					Q9NZL4	Q9H237	P20849	Q9Y286
Q9NSI8		O00623	Q9NSE4	Q9Y221					Q9NZJ5	Q9H1C4	P19823	Q9Y284
Q9NSE4		O00170	Q9NS69	Q9Y217					Q9NZC9	Q9H0X9	P17936	Q9Y282
Q9NSD9		F5H284	Q9NS37	Q9Y216					Q9NZB8	Q9H0V9	P15848	Q9Y279
Q9NS39		F2Z3D1	Q9NS18	Q9UQQ2					Q9NZ71	Q9H0U4	P15289	Q9Y278
Q9NRX1		E9PB15	Q9NRZ5	Q9UQN3					Q9NYY3	Q9H0U3	P14625	Q9Y277
Q9NRW3		A6NM43	Q9NRY6	Q9UQM7					Q9NYV4	Q9H0K1	P14314	Q9Y276
Q9NRR4		A6NFY7	Q9NRX3	Q9UQL6					Q9NYS0	Q9GZZ9	P13942	Q9Y275
Q9NRJ5		A1L188	Q9NRX2	Q9UQK1					Q9NYR9	Q9GZV4	P13674	Q9Y274
Q9NRA8		A0A1W2PR95	Q9NRR4	Q9UQF2					Q9NYQ3	Q9GZU3	P13667	Q9Y271
Q9NR97		A0A0B4J2A2	Q9NRP2	Q9UQE7					Q9NYN1	Q9GZR5	P13611	Q9Y267
Q9NR96		A0A075B767	Q9NRK6	Q9UQC9					Q9NYL2	Q9GZP9	P13521	Q9Y266
Q9NR90		A0A075B759	Q9NRI5	Q9UQC2					Q9NYK5	Q9C0E8	P12644	Q9Y257
Q9NR56			Q9NRA0	Q9UQB8					Q9NYC9	Q9C0D9	P12259	Q9Y256
Q9NR30			Q9NR71	Q9UQ13					Q9NYA1	Q9BZW4	P12111	Q9Y241
Q9NQZ3			Q9NR30	Q9UPZ9					Q9NY93	Q9BZF3	P12110	Q9Y232
Q9NQZ2			Q9NR28	Q9UPZ3					Q9NY65	Q9BZF2	P12109	Q9Y231
Q9NQT5			Q9NR19	Q9UPY3					Q9NY57	Q9BZF1	P12107	Q9Y228
Q9NQT4			Q9NQZ5	Q9UPX8					Q9NXZ2	Q9BYN0	P11150	Q9Y227
Q9NQI0			Q9NQP4	Q9UPW5					Q9NXU5	Q9BYH1	P11047	Q9Y226
Q9NQC3			Q9NQH7	Q9UPV9					Q9NXL9	Q9BY78	P11021	Q9Y225
Q9NQ94			Q9NQ88	Q9UPV0					Q9NXH8	Q9BY64	P10909	Q9Y219
Q9NQ55			Q9NQ50	Q9UPU9					Q9NXC2	Q9BY50	P10768	Q9Y210
Q9NQ50			Q9NPL8	Q9UPU7					Q9NXA8	Q9BY08	P10451	Q9WJR5
Q9NQ39			Q9NPJ3	Q9UPU5					Q9NX74	Q9BX95	P0C0L4	Q9UQV4
Q9NQ29			Q9NPH5	Q9UPT8					Q9NX57	Q9BX59	P09681	Q9UQQ1
Q9NPI6			Q9NPH0	Q9UPT5					Q9NX02	Q9BW60	P09603	Q9UQF0
Q9NPE3			Q9NPG2	Q9UPR3					Q9NWZ5	Q9BVX2	P09382	Q9UQD0
Q9NPE2			Q9NPF8	Q9UPQ9					Q9NWZ3	Q9BVK8	P08842	Q9UQC9
Q9NPD3			Q9NPE2	Q9UPP2					Q9NWX6	Q9BVK6	P08833	Q9UQ90
Q9NP92			Q9NPB1	Q9UPN7					Q9NWW6	Q9BVK2	P08709	Q9UQ53
Q9NP81			Q9NPA8	Q9UPN4					Q9NVV4	Q9BVG9	P08582	Q9UQ52
Q9NP73			Q9NP92	Q9UPM9					Q9NVS9	Q9BVC6	P08572	Q9UQ05
Q9NP64			Q9NP81	Q9UP83					Q9NVP1	Q9BVA6	P08123	Q9UPZ6
Q9NNW5			Q9NP80	Q9UP65					Q9NVN8	Q9BV81	P07996	Q9UPY5
Q9HD40			Q9NP58	Q9UNZ2					Q9NVJ2	Q9BV10	P07942	Q9UPX6
Q9HD15			Q9NNW7	Q9UNY5					Q9NVI7	Q9BUV8	P07237	Q9UPX0
Q9HCM7			Q9HDD0	Q9UNY4					Q9NVF9	Q9BUR5	P07108	Q9UPU3
Q9HCK5			Q9HD36	Q9UNX3					Q9NVE7	Q9BUN8	P06727	Q9UPR5
Q9HCJ3			Q9HD34	Q9UNS2					Q9NVA2	Q9BUM1	P06276	Q9UPQ8
Q9HCJ0			Q9HD33	Q9UNQ2					Q9NV66	Q9BU23	P05997	Q9UPN3
Q9HCG8			Q9HD23	Q9UNP9					Q9NUZ1	Q9BTZ2	P05546	Q9UPI3
Q9HCE5			Q9HCN4	Q9UNN5					Q9NUV9	Q9BTX3	P05305	Q9UPC5
Q9HCE1			Q9HCN2	Q9UNM6					Q9NUU7	Q9BTV4	P05231	Q9UP95
Q9HCD5			Q9HCM9	Q9UNL4					Q9NUT2	Q9BT22	P05155	Q9UP52
Q9HC52			Q9HCL2	Q9UNK9					Q9NUQ8	Q9BSJ8	P05060	Q9UP38
Q9HC44			Q9HCE7	Q9UNK0					Q9NUL7	Q9BSB4	P04628	Q9UNX9
Q9HC36			Q9HCC0	Q9UNI6					Q9NUB1	Q9BS26	P04114	Q9UNW8
Q9HC16			Q9HC96	Q9UNH7					Q9NU22	Q9BRR6	P04085	Q9UNU6
Q9HBL0			Q9HC38	Q9UNH5					Q9NTK5	Q9BRL7	P04070	Q9UNQ0
Q9HBD1			Q9HC36	Q9UNF1					Q9NTJ3	Q9BRK0	P04004	Q9UNP4
Q9HAV4			Q9HC29	Q9UNF0					Q9NTI2	Q9BRC7	P02818	Q9UNN8
Q9HAU5			Q9HC21	Q9UNE7					Q9NTG7	Q9BRB3	P02787	Q9UNN5
Q9HA38			Q9HBH1	Q9UNA1					Q9NSY1	Q9BR39	P02771	Q9UNL2
Q9H9Z2			Q9HBF4	Q9UN86					Q9NSY0	Q9BQT9	P02768	Q9UNK0
Q9H9Y2			Q9HB07	Q9UN37					Q9NSU2	Q9BQK8	P02765	Q9UNG2
Q9H9T3			Q9HAV7	Q9UN36					Q9NST1	Q9BQE5	P02751	Q9UNE0
Q9H9L3			Q9HAP2	Q9UN19					Q9NSE4	Q9BQE4	P02679	Q9UND3
Q9H9J2			Q9HAC7	Q9UMX2					Q9NSD9	Q9BQB6	P02671	Q9UNA3
Q9H9G7			Q9HA92	Q9UMX1					Q9NS87	Q9BQA9	P02652	Q9UN88
Q9H972			Q9HA77	Q9UMX0					Q9NS86	Q9BPW9	P02649	Q9UN76
Q9H8H2			Q9H9P8	Q9UMW8					Q9NRZ9	Q99943	P02647	Q9UN75
Q9H8H0			Q9H9J2	Q9UMS6					Q9NRY5	Q99942	P02462	Q9UN74
Q9H875			Q9H9B4	Q9UMS0					Q9NRY4	Q99941	P02461	Q9UN73
Q9H814			Q9H974	Q9UMQ3					Q9NRW1	Q99735	P02458	Q9UN72
Q9H7N4			Q9H936	Q9UM82					Q9NRP7	Q99720	P02452	Q9UN71
Q9H7E2			Q9H903	Q9UM54					Q9NRM7	Q99685	P01730	Q9UN70
Q9H7B2			Q9H902	Q9UM47					Q9NRK6	Q99683	P01308	Q9UN67
Q9H6T0			Q9H8M1	Q9UM13					Q9NRJ5	Q99640	P01275	Q9UN66
Q9H6S0			Q9H8K7	Q9UM11					Q9NRH3	Q99527	P01210	Q9UN42
Q9H6R4			Q9H845	Q9UM07					Q9NRH2	Q99523	P01127	Q9UN36
Q9H6R0			Q9H825	Q9UM00					Q9NRG1	Q99518	P01042	Q9UMZ3
Q9H6F5			Q9H7Z7	Q9ULZ3					Q9NRF8	Q99487	P01034	Q9UMX9
Q9H6E5			Q9H7H0	Q9ULZ2					Q9NRD9	Q99466	P01033	Q9UMX3
Q9H694			Q9H7D7	Q9ULX3					Q9NRC8	Q99447	P01024	Q9UMS5
Q9H665			Q9H773	Q9ULW8					Q9NRB3	Q99442	P01009	Q9UMR7
Q9H649			Q9H6R4	Q9ULW0					Q9NRA0	Q96T53	P01008	Q9UMR5
Q9H633			Q9H6R3	Q9ULQ0					Q9NR31	Q96SQ9	P00742	Q9UMF0
Q9H5Z1			Q9H6K4	Q9ULP0					Q9NR30	Q96S66	P00740	Q9UMD9
Q9H5Q4			Q9H6E5	Q9ULM6					Q9NR20	Q96S52	P00734	Q9UM73
Q9H5H4			Q9H649	Q9ULL1					Q9NR19	Q96S06	P00451	Q9UM47
Q9H583			Q9H611	Q9ULJ6					Q9NQX7	Q96RT6	P00450	Q9UM44
Q9H501			Q9H5Z6	Q9ULJ3					Q9NQX4	Q96RQ1	O95972	Q9UM21
Q9H4D5			Q9H5Q4	Q9ULI4					Q9NQX3	Q96RL7	O95881	Q9UM01
Q9H3Q1			Q9H596	Q9ULI2					Q9NQW8	Q96RD7	O95858	Q9UM00
Q9H3J6			Q9H583	Q9ULH1					Q9NQU5	Q96QK8	O95633	Q9ULY5
Q9H3H3			Q9H4K7	Q9ULH0					Q9NQT8	Q96Q80	O95479	Q9ULX7
Q9H361			Q9H4I9	Q9ULG1					Q9NQL2	Q96PH1	O95084	Q9ULX5
Q9H307			Q9H4B0	Q9ULE6					Q9NQI0	Q96PD7	O76061	Q9ULW2
Q9H2Y7			Q9H4A6	Q9ULE3					Q9NQE9	Q96PD6	O76024	Q9ULV1
Q9H2U1			Q9H3Z4	Q9ULE0					Q9NQ11	Q96PC5	O75718	Q9ULT6
Q9H1J1			Q9H3P7	Q9ULD4					Q9NPP4	Q96P71	O60613	Q9ULS6
Q9H1E3			Q9H3M7	Q9ULC8					Q9NPJ1	Q96NR8	O60568	Q9ULS5
Q9H1B4			Q9H3L0	Q9ULC6					Q9NPI5	Q96N66	O43852	Q9ULQ1
Q9H171			Q9H3K2	Q9ULC3					Q9NPH5	Q96MT1	O43493	Q9ULP0
Q9H0Z9			Q9H3J6	Q9ULA0					Q9NPD8	Q96MG2	O15460	Q9ULL4
Q9H0U6			Q9H3H1	Q9UL63					Q9NPB1	Q96LW7	O15240	Q9ULK6
Q9H0S4			Q9H300	Q9UL54					Q9NP90	Q96LU7	O15232	Q9ULK5
Q9H0L4			Q9H2X8	Q9UL46					Q9NP81	Q96LT4	O14975	Q9ULK0
Q9H0K6			Q9H2W6	Q9UL45					Q9NP80	Q96L12	O14958	Q9ULI3
Q9H0J9			Q9H2V7	Q9UL33					Q9NP78	Q96KC8	O14791	Q9ULH4
Q9H0G5			Q9H2U2	Q9UL25					Q9NP72	Q96KA5	O14657	Q9ULH0
Q9H0D6			Q9H2U1	Q9UL19					Q9NP58	Q96K19	O14656	Q9ULG6
Q9H0A0			Q9H2K0	Q9UL18					Q9NNW7	Q96JJ7	O00755	Q9ULF5
Q9H074			Q9H2D1	Q9UL15					Q9HD67	Q96JJ6	O00748	Q9ULD8
Q9H000			Q9H1U9	Q9UKZ1					Q9HD20	Q96JE7	O00622	Q9ULC8
Q9GZY0			Q9H1K4	Q9UKY7					Q9HCR9	Q96J65	O00584	Q9ULC5
Q9GZX7			Q9H1K1	Q9UKY4					Q9HCP0	Q96IW7	O00391	Q9ULC0
Q9GZV8			Q9H1A3	Q9UKX2					Q9HCN4	Q96I23	O00255	Q9ULB5
Q9GZV4			Q9H0U6	Q9UKW4					Q9HCK8	Q96HY6	L7RXH5	Q9ULB4
Q9GZT3			Q9H0R8	Q9UKV8					Q9HCE1	Q96HR9	A0A218KGR2	Q9UL62
Q9GZR7			Q9H0R6	Q9UKV5					Q9HCC0	Q96HE7	A0A024RC42	Q9UL54
Q9GZR2			Q9H0E9	Q9UKV3					Q9HC98	Q96HA1	A0A024R5U5	Q9UL52
Q9C0J8			Q9H0C2	Q9UKT9					Q9HC29	Q96H72		Q9UL51
Q9C0D7			Q9H0B6	Q9UKT8					Q9HBY8	Q96GR4		Q9UL19
Q9C0C9			Q9H0B3	Q9UKT7					Q9HBV1	Q96GF1		Q9UL01
Q9C0B0			Q9H078	Q9UKT6					Q9HBU9	Q96GC9		Q9UKZ4
Q9C000			Q9H061	Q9UKT5					Q9HBU6	Q96G97		Q9UKY4
Q9BZZ5			Q9H019	Q9UKT4					Q9HBH9	Q96G30		Q9UKX7
Q9BZJ0			Q9H015	Q9UKS6					Q9HBH0	Q96G23		Q9UKX5
Q9BZI7			Q9GZY8	Q9UKL6					Q9HBA0	Q96FM1		Q9UKV5
Q9BZE4			Q9GZY4	Q9UKK9					Q9HB90	Q96F25		Q9UKU6
Q9BZE2			Q9GZT8	Q9UKK6					Q9HAZ1	Q96EQ8		Q9UKU0
Q9BZE1			Q9GZT6	Q9UKK3					Q9HAV7	Q96E22		Q9UKR8
Q9BZC1			Q9GZT3	Q9UKI9					Q9HAQ2	Q96D59		Q9UKR5
Q9BZB8			Q9GZQ8	Q9UKI2					Q9HAN9	Q96CS3		Q9UKQ2
Q9BYX4			Q9C0C7	Q9UKG9					Q9HAB8	Q96CP6		Q9UKP6
Q9BYN8			Q9C002	Q9UKG1					Q9HA77	Q96CC6		Q9UKN1
Q9BYK8			Q9BZY9	Q9UKF7					Q9HA64	Q96BZ9		Q9UKM7
Q9BYJ9			Q9BZJ4	Q9UKE5					Q9HA47	Q96BZ4		Q9UKL4
Q9BYG3			Q9BZE1	Q9UKD1					Q9H9Y4	Q96BY9		Q9UKL2
Q9BYD6			Q9BZD2	Q9UKB1					Q9H9A7	Q96BY7		Q9UKJ8
Q9BYD3			Q9BZ23	Q9UKA8					Q9H999	Q96BI3		Q9UKJ1
Q9BYD2			Q9BYZ2	Q9UKA4					Q9H981	Q96BA8		Q9UKJ0
Q9BYD1			Q9BYX4	Q9UKA2					Q9H8X2	Q96B96		Q9UKG4
Q9BYC9			Q9BYV7	Q9UKA1					Q9H8M5	Q96AJ9		Q9UKF5
Q9BYC8			Q9BYV1	Q9UK99					Q9H8H2	Q96AG4		Q9UKF2
Q9BY77			Q9BYT8	Q9UK97					Q9H853	Q96AD5		Q9UKB5
Q9BY44			Q9BYN8	Q9UK96					Q9H845	Q96AA3		Q9UKA9
Q9BXY0			Q9BYJ4	Q9UK80					Q9H832	Q96A33		Q9UK28
Q9BXU3			Q9BYD6	Q9UK73					Q9H7X7	Q969X5		Q9UK23
Q9BXU2			Q9BYD3	Q9UK45					Q9H7F0	Q969W1		Q9UK17
Q9BXT6			Q9BYD2	Q9UK41					Q9H773	Q969W0		Q9UK00
Q9BXS6			Q9BYD1	Q9UK32					Q9H6S0	Q969V3		Q9UJT1
Q9BXR3			Q9BYC9	Q9UK22					Q9H6R3	Q969S6		Q9UJS0
Q9BXP5			Q9BYC8	Q9UJY5					Q9H6R0	Q969S0		Q9UJQ1
Q9BXJ9			Q9BYC2	Q9UJY1					Q9H6E5	Q969N2		Q9UJG1
Q9BX46			Q9BY49	Q9UJX6					Q9H628	Q969M3		Q9UJA9
Q9BX40			Q9BXW7	Q9UJX5					Q9H611	Q969F0		Q9UJA2
Q9BWU0			Q9BXR0	Q9UJX4					Q9H5Z1	Q95460		Q9UJ99
Q9BWT3			Q9BXM7	Q9UJX3					Q9H5K3	Q93084		Q9UJ96
Q9BWJ5			Q9BXK5	Q9UJX2					Q9H4M9	Q93063		Q9UJ90
Q9BWF3			Q9BXI2	Q9UJW3					Q9H4L7	Q92935		Q9UJ71
Q9BWE0			Q9BXH1	Q9UJW0					Q9H4K7	Q92903		Q9UJ42
Q9BVP2			Q9BXF6	Q9UJV9					Q9H4E5	Q92890		Q9UJ37
Q9BVJ6			Q9BX68	Q9UJU6					Q9H4B7	Q92838		Q9UJ14
Q9BVI4			Q9BWM7	Q9UJT9					Q9H4B4	Q92819		Q9UIX4
Q9BV44			Q9BWL3	Q9UJT1					Q9H4A3	Q92781		Q9UIW2
Q9BUR4			Q9BWH2	Q9UJQ7					Q9H497	Q92736		Q9UIV8
Q9BUQ8			Q9BWD1	Q9UJP4					Q9H479	Q92685		Q9UIR0
Q9BUL9			Q9BW92	Q9UJM8					Q9H477	Q92673		Q9UIR0
Q9BUJ2			Q9BW91	Q9UJM3					Q9H422	Q92643		Q9UIQ6
Q9BUB4			Q9BW72	Q9UJK0					Q9H3Y6	Q92611		Q9UIK5
Q9BU76			Q9BVV7	Q9UJF2					Q9H3S4	Q92604		Q9UIK4
Q9BTL3			Q9BVS5	Q9UJC3					Q9H3P7	Q92581		Q9UIJ5
Q9BTF0			Q9BVL4	Q9UJ83					Q9H3H1	Q92575		Q9UIG8
Q9BTD8			Q9BV79	Q9UJ70					Q9H2X6	Q92539		Q9UID3
Q9BTC0			Q9BV35	Q9UJ68					Q9H2U1	Q92535		Q9UIB8
Q9BSH4			Q9BV23	Q9UJ55					Q9H2T7	Q92521		Q9UI40
Q9BSD7			Q9BUV8	Q9UJ41					Q9H2K8	Q92508		Q9UI33
Q9BSC4			Q9BUR5	Q9UIW2					Q9H2H0	Q92504		Q9UI14
Q9BRZ2			Q9BUP0	Q9UIV8					Q9H2G2	Q8WXH2		Q9UI09
Q9BRU9			Q9BUK6	Q9UIV1					Q9H270	Q8WXH0		Q9UHX3
Q9BRT6			Q9BUK0	Q9UIQ6					Q9H223	Q8WXG1		Q9UHW9
Q9BRS8			Q9BUE6	Q9UIM3					Q9H222	Q8WXF7		Q9UHQ9
Q9BRR8			Q9BUB7	Q9UIL1					Q9H221	Q8WWR8		Q9UHQ4
Q9BRP8			Q9BUA6	Q9UII4					Q9H1R3	Q8WWP7		Q9UHP7
Q9BRL6			Q9BU61	Q9UIF9					Q9H1H9	Q8WWF5		Q9UHN6
Q9BRJ7			Q9BTZ2	Q9UID3					Q9H173	Q8WW62		Q9UHM6
Q9BRJ6			Q9BTU6	Q9UIC8					Q9H172	Q8WVZ7		Q9UHJ9
Q9BRJ2			Q9BT92	Q9UIA0					Q9H0U4	Q8WVX3		Q9UHI7
Q9BRD0			Q9BT30	Q9UI95					Q9H0T7	Q8WVQ1		Q9UHI5
Q9BQG0			Q9BT17	Q9UI36					Q9H0S4	Q8WVM8		Q9UHF4
Q9BQ75			Q9BSY4	Q9UI30					Q9H0R6	Q8WVE7		Q9UHF3
Q9BQ67			Q9BSQ5	Q9UI26					Q9H0R5	Q8WV99		Q9UHE8
Q9BQ61			Q9BSK4	Q9UI12					Q9H0P0	Q8WUU8		Q9UHE5
Q9BQ52			Q9BSK2	Q9UI10					Q9H0N0	Q8WUD6		Q9UHC9
Q9BQ39			Q9BSH4	Q9UI09					Q9H0M4	Q8WUD1		Q9UHC6
Q9BQ04			Q9BSF4	Q9UI08					Q9H0K1	Q8WU17		Q9UHC3
Q9BPZ3			Q9BSE5	Q9UHY7					Q9H0F7	Q8WTX9		Q9UH99
Q99973			Q9BS92	Q9UHV9					Q9H0A0	Q8TEY5		Q9UH62
Q99873			Q9BRT2	Q9UHR4					Q9H093	Q8TEQ8		Q9UGT4
Q99848			Q9BRQ8	Q9UHQ9					Q9H089	Q8TEM1		Q9UGQ3
Q99733			Q9BRQ6	Q9UHP3					Q9H082	Q8TED4		Q9UGQ2
Q99729			Q9BRJ2	Q9UHN6					Q9H078	Q8TEB9		Q9UGP8
Q99728			Q9BRI3	Q9UHL9					Q9H015	Q8TDY2		Q9UGN4
Q99714			Q9BR01	Q9UHK6					Q9GZZ9	Q8TDW0		Q9UGM1
Q99700			Q9BQT8	Q9UHJ6					Q9GZT4	Q8TDN7		Q9UGJ0
Q99613			Q9BQP7	Q9UHI6					Q9GZR7	Q8TCY5		Q9UGI6
Q99598			Q9BQD7	Q9UHG0					Q9GZQ4	Q8TCU5		Q9UGH3
Q99590			Q9BQC6	Q9UHD9					Q9C0K7	Q8TCT9		Q9UGF7
Q99575			Q9BQ95	Q9UHD4					Q9C0K3	Q8TCT8		Q9UGF6
Q99551			Q9BQ52	Q9UHD2					Q9C0G6	Q8TCT7		Q9UGF5
Q99547			Q9BQ48	Q9UHC7					Q9C0C9	Q8TCT6		Q9UG56
Q99543			Q9BPX6	Q9UHB9					Q9C098	Q8TCS8		Q9UF56
Q99502			Q9BPW8	Q9UHB6					Q9C000	Q8TCQ1		Q9UF33
Q99497			Q99972	Q9UHB4					Q9BZX2	Q8TCJ2		Q9UF11
Q99459			Q99942	Q9UH92					Q9BZQ4	Q8TCG5		Q9UF02
Q96T58			Q99807	Q9UH90					Q9BZL6	Q8TCG2		Q9UEW3
Q96T37			Q99798	Q9UH77					Q9BZG1	Q8TC12		Q9UEU0
Q96T21			Q99797	Q9UH65					Q9BZE4	Q8TBM8		Q9UEF7
Q96ST3			Q99766	Q9UH62					Q9BZC7	Q8TBF5		Q9UDX5
Q96SI9			Q99757	Q9UGP4					Q9BZ23	Q8TBE1		Q9UDX4
Q96SB4			Q99747	Q9UGL1					Q9BYZ6	Q8TB92		Q9UDW1
Q96RP9			Q99714	Q9UGK8					Q9BYX7	Q8TB40		Q9UBY8
Q96QR8			Q99689	Q9UGK3					Q9BYX4	Q8TAV3		Q9UBY5
Q96QE5			Q99643	Q9UGJ1					Q9BYT3	Q8TAT6		Q9UBY0
Q96QD9			Q99623	Q9UGJ0					Q9BYP7	Q8TAD4		Q9UBX8
Q96QC0			Q99595	Q9UGI9					Q9BYN0	Q8TA86		Q9UBX3
Q96Q15			Q99572	Q9UGI8					Q9BYK8	Q8NI22		Q9UBV7
Q96Q11			Q99551	Q9UGI0					Q9BY32	Q8NHP6		Q9UBV2
Q96PZ0			Q99536	Q9UGB7					Q9BXU1	Q8NHH9		Q9UBU6
Q96PU8			Q99527	Q9UFN0					Q9BXT6	Q8NHG7		Q9UBS9
Q96PM9			Q99497	Q9UFF9					Q9BXM7	Q8NFR3		Q9UBS5
Q96PK6			Q99417	Q9UFE4					Q9BXI3	Q8NFQ8		Q9UBR5
Q96P11			Q96TC7	Q9UF56					Q9BXA7	Q8NF37		Q9UBQ6
Q96N16			Q96TA2	Q9UEY8					Q9BXA6	Q8NEW0		Q9UBP0
Q96MU7			Q96T66	Q9UEW8					Q9BX84	Q8NEN9		Q9UBN7
Q96MH2			Q96T60	Q9UEU0					Q9BX68	Q8NCR0		Q9UBN6
Q96M93			Q96T52	Q9UET6					Q9BX63	Q8NCK7		Q9UBN4
Q96LT9			Q96T21	Q9UER7					Q9BX10	Q8NCC5		Q9UBN1
Q96KR1			Q96SZ6	Q9UDY8					Q9BWV7	Q8NC44		Q9UBM8
Q96K80			Q96ST8	Q9UDY4					Q9BWU1	Q8NBV4		Q9UBM7
Q96J94			Q96RR1	Q9UDY2					Q9BWT3	Q8NBQ7		Q9UBM1
Q96J87			Q96RQ3	Q9UDR5					Q9BW92	Q8NBM4		Q9UBL9
Q96J01			Q96RP9	Q9UD71					Q9BW83	Q8NBL3		Q9UBK5
Q96IZ5			Q96RL7	Q9UBX2					Q9BW19	Q8NBI6		Q9UBJ2
Q96IP4			Q96QK1	Q9UBW8					Q9BVS4	Q8NB49		Q9UBI4
Q96IC2			Q96QE5	Q9UBW7					Q9BVQ7	Q8NAT1		Q9UBH6
Q96I51			Q96Q83	Q9UBU9					Q9BVP2	Q8NA58		Q9UBG0
Q96I25			Q96Q11	Q9UBT7					Q9BVL4	Q8NA29		Q9UBD6
Q96I24			Q96PN6	Q9UBS8					Q9BVG8	Q8N9F7		Q9P2Y4
Q96HR8			Q96PE7	Q9UBR1					Q9BVA6	Q8N9F0		Q9P2X0
Q96H35			Q96PD7	Q9UBQ7					Q9BVA1	Q8N966		Q9P2W9
Q96GQ7			Q96P20	Q9UBQ6					Q9BUT1	Q8N8V4		Q9P2W7
Q96GM8			Q96NN9	Q9UBQ5					Q9BUQ8	Q8N8F6		Q9P2V4
Q96G46			Q96ND0	Q9UBQ0					Q9BUF5	Q8N766		Q9P2U8
Q96G21			Q96NB2	Q9UBP6					Q9BUB5	Q8N6S4		Q9P2U7
Q96FV9			Q96N28	Q9UBP0					Q9BU20	Q8N6R1		Q9P2P1
Q96FQ6			Q96N06	Q9UBN7					Q9BTU6	Q8N6M3		Q9P2K9
Q96FN9			Q96MF6	Q9UBM1					Q9BTE6	Q8N6L1		Q9P2J2
Q96FC9			Q96LZ7	Q9UBK8					Q9BT17	Q8N661		Q9P2E9
Q96F86			Q96LZ3	Q9UBK2					Q9BST9	Q8N609		Q9P2E8
Q96EZ8			Q96LW7	Q9UBJ2					Q9BSD7	Q8N5Y8		Q9P2E7
Q96EY7			Q96LW4	Q9UBF8					Q9BRT8	Q8N5M9		Q9P2E5
Q96EV2			Q96LU5	Q9UBF6					Q9BRS2	Q8N5K1		Q9P2D8
Q96EU6			Q96LL9	Q9UBF2					Q9BRQ8	Q8N5G2		Q9P2C4
Q96EP5			Q96LC9	Q9UBF1					Q9BR61	Q8N5B7		Q9P2B2
Q96EL2			Q96KR6	Q9UBE8					Q9BQI3	Q8N511		Q9P298
Q96E39			Q96KJ9	Q9UBC9					Q9BQE3	Q8N4V1		Q9P296
Q96DU9			Q96KC9	Q9UBC2					Q9BQA1	Q8N4F7		Q9P291
Q96DI7			Q96JZ2	Q9UBC1					Q9BQ39	Q8N3Y7		Q9P283
Q96DH6			Q96JX3	Q9UBB6					Q9BPW5	Q8N394		Q9P273
Q96DE0			Q96IX5	Q9UBB5					Q99986	Q8N2K1		Q9P260
Q96D46			Q96IR7	Q9UBB4					Q99973	Q8N2K0		Q9P246
Q96CX2			Q96IL0	Q9P2T1					Q99933	Q8N2F6		Q9P244
Q96CT7			Q96I99	Q9P2R3					Q99873	Q8N138		Q9P241
Q96CP2			Q96I59	Q9P2N7					Q99832	Q8N118		Q9P1W8
Q96CM3			Q96I51	Q9P2N2					Q99759	Q8N114		Q9P1W3
Q96CB9			Q96I36	Q9P2M4					Q99758	Q8N0U8		Q9P1Q5
Q96C86			Q96I23	Q9P2K8					Q99755	Q8IZV5		Q9P1P5
Q96C10			Q96HY7	Q9P2K6					Q99741	Q8IZN3		Q9P1P4
Q96BT7			Q96HS1	Q9P2K3					Q99719	Q8IYV9		Q9P126
Q96BP2			Q96HJ9	Q9P2K1					Q99683	Q8IYS0		Q9P109
Q96BK5			Q96H96	Q9P2J5					Q99661	Q8IY26		Q9P0X4
Q96B26			Q96H78	Q9P2J3					Q99640	Q8IY17		Q9P0V8
Q96B01			Q96H55	Q9P2H5					Q99626	Q8IX94		Q9P0U1
Q96AZ6			Q96GZ6	Q9P2G3					Q99611	Q8IWX8		Q9P0T7
Q96AK3			Q96GW9	Q9P2F6					Q99578	Q8IWX5		Q9P0S9
Q96AH0			Q96GJ1	Q9P2E2					Q99572	Q8IWR1		Q9P0S3
Q96AG4			Q96GF1	Q9P2D3					Q99571	Q8IWL2		Q9P0S2
Q96AE4			Q96GE9	Q9P299					Q99570	Q8IWL1		Q9P0N8
Q96A72			Q96GC5	Q9P289					Q99558	Q8IWB9		Q9P0N5
Q96A35			Q96FX8	Q9P287					Q99518	Q8IVT5		Q9P0L9
Q96A33			Q96EY8	Q9P286					Q99490	Q8IV08		Q9P0L0
Q969Z0			Q96EY7	Q9P278					Q99489	Q8IUY3		Q9P0K9
Q969X6			Q96EY1	Q9P275					Q99424	Q8IUH8		Q9P0K1
Q969S3			Q96ER9	Q9P270					Q96TA2	Q8IU99		Q9P0J0
Q969L4			Q96EL3	Q9P258					Q96T88	Q8IU89		Q9P0I2
Q969H6			Q96EL2	Q9P243					Q96T66	Q8IU68		Q9P0B6
Q969G3			Q96EK5	Q9P227					Q96T60	Q86YR5		Q9P055
Q93073			Q96EH3	Q9P212					Q96SF2	Q86YN1		Q9P035
Q93062			Q96E52	Q9P209					Q96SB8	Q86YC3		Q9P003
Q92979			Q96E29	Q9P1Z2					Q96SB4	Q86YB8		Q9NZV8
Q92973			Q96E11	Q9P1Z0					Q96S79	Q86Y07		Q9NZV1
Q92945			Q96DX5	Q9P1Q0					Q96S55	Q86XL3		Q9NZU1
Q92917			Q96DW6	Q9P107					Q96S53	Q86WV6		Q9NZU0
Q92904			Q96DV4	Q9P104					Q96S44	Q86W10		Q9NZS9
Q92901			Q96DU9	Q9P0Z9					Q96S38	Q86VR2		Q9NZS2
Q92900			Q96DT0	Q9P0W8					Q96S21	Q86VF5		Q9NZR2
Q92888			Q96DP5	Q9P0U4					Q96RU8	Q86VD9		Q9NZQ8
Q92879			Q96DC8	Q9P0N9					Q96RU7	Q86UW1		Q9NZQ7
Q92841			Q96DB5	Q9P0N8					Q96RR4	Q86UP2		Q9NZP5
Q92834			Q96DA6	Q9P0N5					Q96RR1	Q86UL3		Q9NZP2
Q92804			Q96D53	Q9P0M2					Q96RQ3	Q86UF2		Q9NZP0
Q92771			Q96CU9	Q9P0L9					Q96RP9	Q86UE4		Q9NZN1
Q92769			Q96CQ1	Q9P0L0					Q96RP7	Q86TM6		Q9NZM6
Q92667			Q96CM8	Q9P0K7					Q96RG2	Q86TL2		Q9NZM1
Q92665			Q96CM3	Q9P0J7					Q96QZ7	Q86TD4		Q9NZJ7
Q92664			Q96CB9	Q9P032					Q96QT4	Q86T96		Q9NZJ5
Q92620			Q96C86	Q9P000					Q96QS6	Q86SQ9		Q9NZI2
Q92616			Q96C36	Q9NZZ3					Q96QP1	Q86SQ4		Q9NZH0
Q92615			Q96C03	Q9NZV6					Q96QE3	Q86SK9		Q9NZG7
Q92614			Q96BY2	Q9NZU0					Q96Q89	Q7Z7H5		Q9NZD1
Q92552			Q96BW9	Q9NZQ3					Q96Q40	Q7Z7B1		Q9NZC3
Q92541			Q96BR5	Q9NZN9					Q96Q15	Q7Z5M8		Q9NZC2
Q92540			Q96BP2	Q9NZN8					Q96Q11	Q7Z5B4		Q9NZA1
Q92522			Q96BM0	Q9NZN5					Q96Q04	Q7Z4N2		Q9NZ94
Q92499			Q96BK5	Q9NZN4					Q96PY6	Q7Z449		Q9NZ53
Q8WYQ5			Q96BI3	Q9NZN3					Q96PP9	Q7Z403		Q9NZ45
Q8WY41			Q96BF6	Q9NZM5					Q96PP8	Q7Z3C6		Q9NZ43
Q8WXF1			Q96B77	Q9NZM3					Q96PN8	Q7Z2W7		Q9NZ42
Q8WXF0			Q96B49	Q9NZL9					Q96PN6	Q7Z2K6		Q9NZ08
Q8WXD2			Q96AY3	Q9NZL6					Q96PH1	Q7L775		Q9NZ01
Q8WXA9			Q96AQ8	Q9NZJ9					Q96PF2	Q7L5N7		Q9NYZ4
Q8WX92			Q96AN5	Q9NZJ5					Q96PC2	Q7L5L3		Q9NYZ2
Q8WWY3			Q96AG4	Q9NZJ0					Q96P47	Q7L5A8		Q9NYZ1
Q8WWM7			Q96AG3	Q9NZI8					Q96P26	Q7L1W4		Q9NYX4
Q8WWH5			Q96A70	Q9NZI7					Q96P20	Q7L1T6		Q9NYW7
Q8WW36			Q96A46	Q9NZH8					Q96NX5	Q76MJ5		Q9NYW6
Q8WW33			Q96A35	Q9NZH6					Q96NN9	Q75V66		Q9NYW5
Q8WVV9			Q96A26	Q9NZH0					Q96MN2	Q75T13		Q9NYW4
Q8WVM0			Q969Z3	Q9NZD8					Q96MM6	Q71RH2		Q9NYW3
Q8WV60			Q969Z0	Q9NZD4					Q96MA6	Q71H61		Q9NYW2
Q8WUQ7			Q969Y2	Q9NZD2					Q96M86	Q70UQ0		Q9NYW1
Q8WUF8			Q969V5	Q9NZC7					Q96M69	Q70SY1		Q9NYW0
Q8WUA2			Q969S9	Q9NZB8					Q96M32	Q709C8		Q9NYV9
Q8WU90			Q969P6	Q9NZB2					Q96M20	Q6ZWT7		Q9NYV8
Q8WU68			Q969M1	Q9NZ81					Q96LW2	Q6ZWL3		Q9NYV7
Q8WU43			Q969I3	Q9NZ72					Q96LR5	Q6ZV29		Q9NYR8
Q8WTT2			Q969H0	Q9NZ63					Q96L96	Q6ZPD8		Q9NYQ8
Q8TF46			Q969G6	Q9NZ56					Q96L93	Q6ZNE5		Q9NYQ7
Q8TF01			Q969F0	Q9NZ32					Q96L91	Q6ZNC8		Q9NYQ6
Q8TEQ6			Q92947	Q9NZ09					Q96L34	Q6ZNB7		Q9NYM9
Q8TED0			Q92934	Q9NZ08					Q96L33	Q6ZMZ0		Q9NYM4
Q8TEA8			Q92876	Q9NYZ3					Q96KG9	Q6ZMG9		Q9NYL5
Q8TEA1			Q92843	Q9NYY3					Q96KC2	Q6YHU6		Q9NYL4
Q8TE96			Q92833	Q9NYS7					Q96KB5	Q6Y2X3		Q9NYK1
Q8TE02			Q92754	Q9NYS0					Q96JP2	Q6Y288		Q9NYJ7
Q8TDN6			Q92731	Q9NYR8					Q96JB1	Q6Y1H2		Q9NYG8
Q8TDD1			Q92686	Q9NYQ3					Q96J92	Q6XPS3		Q9NYG2
Q8TD47			Q92667	Q9NYP9					Q96J66	Q6VVX0		Q9NYB5
Q8TCS8			Q92665	Q9NYM9					Q96J65	Q6V0L0		Q9NY97
Q8TC92			Q92558	Q9NYL2					Q96I99	Q6UXG2		Q9NY91
Q8TC59			Q92552	Q9NYJ8					Q96I59	Q6UXD5		Q9NY72
Q8TBZ6			Q92542	Q9NYG5					Q96I51	Q6UX53		Q9NY65
Q8TBY0			Q92538	Q9NYF5					Q96HU8	Q6UX01		Q9NY64
Q8TBF4			Q92523	Q9NYF0					Q96HE7	Q6UWP7		Q9NY59
Q8TB72			Q92506	Q9NYB9					Q96H55	Q6UWM7		Q9NY47
Q8TAS1			Q92503	Q9NYA4					Q96GX5	Q6UWI4		Q9NY46
Q8TAD8			Q92499	Q9NYA1					Q96GW9	Q6UVY6		Q9NY37
Q8TA86			Q8WYQ3	Q9NY93					Q96GR2	Q6RW13		Q9NY35
Q8NI36			Q8WY54	Q9NY74					Q96GQ7	Q6R6M4		Q9NY28
Q8NI27			Q8WY22	Q9NY33					Q96GD4	Q6QHC5		Q9NY26
Q8NHW5			Q8WXI4	Q9NY25					Q96G46	Q6PKC3		Q9NY25
Q8NHU6			Q8WXH0	Q9NXV2					Q96FN5	Q6PJF5		Q9NY15
Q8NHQ9			Q8WXG1	Q9NXR7					Q96FC9	Q6PIU2		Q9NXW2
Q8NHP7			Q8WX93	Q9NXR1					Q96F15	Q6PI25		Q9NXS2
Q8NHM5			Q8WWV3	Q9NXL2					Q96EY8	Q6P9F7		Q9NXL6
Q8NG50			Q8WWR8	Q9NXK8					Q96EY1	Q6P4F1		Q9NXK6
Q8NF91			Q8WWI5	Q9NXJ5					Q96EP1	Q6P1M0		Q9NXJ0
Q8NEZ4			Q8WWH5	Q9NXG0					Q96EK9	Q6P1A2		Q9NXI6
Q8NEY8			Q8WWC4	Q9NXD2					Q96E17	Q6P179		Q9NXH8
Q8NEJ9			Q8WVM0	Q9NXC5					Q96DU7	Q6NUS8		Q9NXG6
Q8NEF9			Q8WVI0	Q9NXB0					Q96DT5	Q6NUQ4		Q9NXF8
Q8NE71			Q8WV93	Q9NXA8					Q96DE0	Q6NUQ1		Q9NXE4
Q8NE35			Q8WV74	Q9NX74					Q96DA2	Q6NUM9		Q9NXB9
Q8NE18			Q8WV60	Q9NX62					Q96D53	Q6NUK4		Q9NX95
Q8NDV7			Q8WUT9	Q9NX24					Q96D21	Q6NTF9		Q9NX94
Q8NDT2			Q8WUK0	Q9NX18					Q96CM8	Q6NT55		Q9NX78
Q8NDG6			Q8WU03	Q9NX09					Q96CD2	Q6NSJ5		Q9NX77
Q8NDF8			Q8WTZ4	Q9NX08					Q96C45	Q6NSJ0		Q9NX76
Q8NDD1			Q8WTT2	Q9NX04					Q96C10	Q6IS14		Q9NX63
Q8ND56			Q8TF08	Q9NX02					Q96BW1	Q6IPT4		Q9NX62
Q8NCV1			Q8TEY5	Q9NX01					Q96BR1	Q6IC98		Q9NX61
Q8NCA5			Q8TEB9	Q9NWZ8					Q96BM9	Q6IAN0		Q9NX52
Q8NC60			Q8TEA8	Q9NWZ5					Q96B02	Q6E213		Q9NX47
Q8NC51			Q8TDB4	Q9NWZ3					Q96AX2	Q6DN14		Q9NX14
Q8NBP7			Q8TD30	Q9NWX6					Q96AH8	Q6DD88		Q9NX00
Q8NBJ9			Q8TD22	Q9NWX5					Q96AC6	Q6BCY4		Q9NWW9
Q8NAV1			Q8TCS8	Q9NWW9					Q96A58	Q6AZY7		Q9NWW5
Q8NAF0			Q8TCG5	Q9NWW6					Q96A11	Q68DV7		Q9NWS6
Q8NA77			Q8TCC3	Q9NWV8					Q969Y2	Q68DA7		Q9NWR8
Q8NA58			Q8TC76	Q9NWU2					Q969T7	Q68D91		Q9NWQ8
Q8N9W6			Q8TC71	Q9NWU1					Q969T4	Q68CJ9		Q9NWH2
Q8N9T8			Q8TBP6	Q9NWT8					Q969S9	Q674R7		Q9NWF4
Q8N9N8			Q8TBG4	Q9NWT6					Q969Q5	Q643R3		Q9NWD8
Q8N9N2			Q8TB37	Q9NWQ9					Q969Q4	Q629K1		Q9NWC5
Q8N983			Q8TB36	Q9NWM0					Q969M7	Q5W0Z9		Q9NW97
Q8N8Q3			Q8TAE8	Q9NWF9					Q969G6	Q5VWC8		Q9NW15
Q8N8A6			Q8TAA5	Q9NWD9					Q969G2	Q5VV42		Q9NVV5
Q8N7X1			Q8NI60	Q9NWB6					Q93086	Q5VUD6		Q9NVV0
Q8N726			Q8NI37	Q9NW08					Q93084	Q5VTY9		Q9NVM1
Q8N6Y1			Q8NG08	Q9NVX0					Q93015	Q5UCC4		Q9NVI7
Q8N6W0			Q8NFV4	Q9NVW2					Q92989	Q5TGU0		Q9NVH1
Q8N6T7			Q8NFF5	Q9NVU0					Q92963	Q5TEA6		Q9NVH0
Q8N6N3			Q8NF64	Q9NVT9					Q92947	Q5TCH4		Q9NVC3
Q8N684			Q8NEW0	Q9NVS9					Q92930	Q5T9L3		Q9NVA4
Q8N5X7			Q8NER1	Q9NVR5					Q92928	Q5T7M9		Q9NV96
Q8N5P1			Q8NEN9	Q9NVR0					Q92918	Q5T6L9		Q9NV92
Q8N5L8			Q8NEJ9	Q9NVP2					Q92900	Q5T4F4		Q9NV66
Q8N5K1			Q8NEJ0	Q9NVN8					Q92887	Q5SGD2		Q9NV64
Q8N5F7			Q8NE86	Q9NVN3					Q92878	Q5S007		Q9NV58
Q8N5C6			Q8NE62	Q9NVM4					Q92841	Q5QFB9		Q9NV29
Q8N567			Q8ND71	Q9NVK5					Q92826	Q5M7Z0		Q9NV12
Q8N3Z6			Q8NCW5	Q9NVJ2					Q92777	Q5JRA6		Q9NUV7
Q8N3C0			Q8NCU8	Q9NVI1					Q92772	Q5JPE7		Q9NUT2
Q8N2G6			Q8NCR3	Q9NVG8					Q92771	Q5J8M3		Q9NUR3
Q8N1W1			Q8NCN5	Q9NVF9					Q92737	Q5HYA8		Q9NUQ2
Q8N1G4			Q8NC60	Q9NVE7					Q92730	Q5H8A4		Q9NUN7
Q8N163			Q8NBX0	Q9NVE5					Q92698	Q5EB52		Q9NUN5
Q8N0Z8			Q8NBU5	Q9NVD7					Q92630	Q5D1E8		Q9NUM4
Q8IZQ5			Q8NBN7	Q9NVD3					Q92628	Q5BVD1		Q9NUM3
Q8IZL8			Q8NB90	Q9NV88					Q92620	Q5BKT4		Q9NUH8
Q8IZH2			Q8NAN2	Q9NV70					Q92614	Q5BJH7		Q9NUE0
Q8IZD4			Q8N9M5	Q9NV58					Q92599	Q5BJF2		Q9NUD9
Q8IZ73			Q8N9F0	Q9NV35					Q92598	Q5BJD5		Q9NUB4
Q8IZ69			Q8N983	Q9NV23					Q92570	Q58HT5		Q9NU53
Q8IYX4			Q8N945	Q9NV06					Q92551	Q53R12		Q9NTX5
Q8IYD1			Q8N8R5	Q9NUY8					Q92526	Q53GQ0		Q9NTU4
Q8IYB8			Q8N8R3	Q9NUV9					Q92519	Q53FV1		Q9NTQ9
Q8IYB7			Q8N8Q8	Q9NUS5					Q92506	Q53FP2		Q9NTN9
Q8IYB3			Q8N726	Q9NUQ6					Q92499	Q53EU6		Q9NTN3
Q8IY81			Q8N6R0	Q9NUQ3					Q8WZA9	Q4ZIN3		Q9NTJ5
Q8IY67			Q8N5Z0	Q9NUP1					Q8WZA2	Q4VNC1		Q9NTI2
Q8IY37			Q8N5S1	Q9NUL7					Q8WZ42	Q4V9L6		Q9NTG1
Q8IY21			Q8N5N7	Q9NUL5					Q8WYK0	Q495M3		Q9NT99
Q8IXT5			Q8N5M1	Q9NUK0					Q8WYJ6	Q3ZAQ7		Q9NT68
Q8IXM3			Q8N5K1	Q9NUJ1					Q8WXX0	Q3SYC2		Q9NSU2
Q8IXH7			Q8N5G0	Q9NUI1					Q8WXR4	Q3SY77		Q9NST1
Q8IX18			Q8N573	Q9NU22					Q8WXI2	Q3SXY7		Q9NSK7
Q8IX12			Q8N4T8	Q9NTX9					Q8WXH6	Q3MUY2		Q9NSI5
Q8IX01			Q8N4Q1	Q9NTX7					Q8WXF7	Q3KR37		Q9NSD7
Q8IWZ8			Q8N4H5	Q9NTX5					Q8WX94	Q3KNS1		Q9NSD5
Q8IWZ3			Q8N4E7	Q9NTM9					Q8WWZ7	Q30154		Q9NSC7
Q8IWX8			Q8N490	Q9NTK5					Q8WWZ4	Q2TAZ0		Q9NSA2
Q8IWS0			Q8N465	Q9NTJ4					Q8WWY6	Q2TAA5		Q9NSA0
Q8IWR0			Q8N442	Q9NTJ3					Q8WWP7	Q2M3R5		Q9NS98
Q8IWA0			Q8N413	Q9NTI5					Q8WW22	Q2LD37		Q9NS93
Q8IW35			Q8N3Z3	Q9NT62					Q8WVN8	Q2KHT4		Q9NS84
Q8IVS2			Q8N3R3	Q9NSY2					Q8WVC6	Q24JP5		Q9NS82
Q8IV48			Q8N3J5	Q9NSV4					Q8WVB6	Q1HG44		Q9NS75
Q8IV42			Q8N3J2	Q9NSU2					Q8WV93	Q1HG43		Q9NS69
Q8IUX4			Q8N357	Q9NSP4					Q8WUD1	Q16873		Q9NS68
Q8IUH3			Q8N2H3	Q9NSK7					Q8WU10	Q16850		Q9NS67
Q8IU60			Q8N2F6	Q9NSI8					Q8WU08	Q16799		Q9NS66
Q86YN6			Q8N2A8	Q9NSI6					Q8WTQ7	Q16696		Q9NS64
Q86Y79			Q8N1Q8	Q9NSE2					Q8TF76	Q16678		Q9NS62
Q86Y13			Q8N183	Q9NSD9					Q8TF62	Q16655		Q9NS61
Q86XZ4			Q8N163	Q9NSC5					Q8TEA8	Q16647		Q9NS40
Q86XP3			Q8N159	Q9NSB8					Q8TEA7	Q16518		Q9NS00
Q86XN8			Q8N111	Q9NSB4					Q8TE96	Q16394		Q9NRZ7
Q86XF0			Q8N0Z8	Q9NSB2					Q8TE73	Q15904		Q9NRZ5
Q86WX3			Q8N0Z6	Q9NSA3					Q8TE04	Q15800		Q9NRY7
Q86WP2			Q8N0X7	Q9NS87					Q8TDZ2	Q15738		Q9NRY6
Q86W50			Q8N0X4	Q9NS86					Q8TDX7	Q15629		Q9NRX6
Q86W42			Q8N0V3	Q9NS73					Q8TDR2	Q15465		Q9NRX5
Q86VM9			Q8IZY5	Q9NS62					Q8TDI0	Q15437		Q9NRX3
Q86V81			Q8IZJ6	Q9NRY6					Q8TDG4	Q15436		Q9NRW7
Q86US8			Q8IZ52	Q9NRY4					Q8TDD1	Q15413		Q9NRU3
Q86UR5			Q8IYU8	Q9NRX4					Q8TDC3	Q15392		Q9NRS4
Q86UP2			Q8IYJ2	Q9NRX1					Q8TD57	Q15382		Q9NRR2
Q86UK7			Q8IYB8	Q9NRW4					Q8TD43	Q15363		Q9NRQ5
Q86UE4			Q8IXQ9	Q9NRW1					Q8TD26	Q15166		Q9NRQ2
Q86UA1			Q8IXQ6	Q9NRS6					Q8TD19	Q15155		Q9NRP0
Q86U90			Q8IXM3	Q9NRR6					Q8TD08	Q15125		Q9NRM6
Q86U44			Q8IXL7	Q9NRR5					Q8TCY9	Q15084		Q9NRM0
Q86U42			Q8IXJ6	Q9NRR4					Q8TCT0	Q15042		Q9NRK6
Q86U38			Q8IXI2	Q9NRP7					Q8TCG2	Q15041		Q9NRJ7
Q86U06			Q8IXI1	Q9NRN9					Q8TCD5	Q15011		Q9NRD9
Q86TM3			Q8IWW8	Q9NRN7					Q8TBX8	Q15006		Q9NRD8
Q86TG7			Q8IWL3	Q9NRM7					Q8TBC4	Q15005		Q9NRC1
Q86TB9			Q8IWA5	Q9NRJ4					Q8TB37	Q14957		Q9NRB3
Q86SH2			Q8IWA4	Q9NRI5					Q8TAS1	Q14849		Q9NRA2
Q86SG3			Q8IW45	Q9NRH3					Q8TAM1	Q14802		Q9NR97
Q86SE8			Q8IW03	Q9NRG9					Q8TAI7	Q14739		Q9NR96
Q86SE5			Q8IVS8	Q9NRG4					Q8TAA5	Q14703		Q9NR82
Q7Z7L1			Q8IVS2	Q9NRG1					Q8NI77	Q14693		Q9NR77
Q7Z7H8			Q8IVP5	Q9NRF8					Q8NI60	Q14667		Q9NR71
Q7Z7F0			Q8IVH4	Q9NRF2					Q8NHZ7	Q14643		Q9NR61
Q7Z7A3			Q8IVG9	Q9NRD8					Q8NHV1	Q14623		Q9NR34
Q7Z739			Q8IVG5	Q9NRD5					Q8NHQ9	Q14573		Q9NR28
Q7Z6Z7			Q8IUZ5	Q9NRD1					Q8NHH9	Q14571		Q9NR16
Q7Z6M4			Q8IUX1	Q9NRC6					Q8NHH1	Q14554		Q9NQZ7
Q7Z6E9			Q8IUC6	Q9NRA8					Q8NG68	Q14534		Q9NQX7
Q7Z5W3			Q86YN6	Q9NRA2					Q8NG66	Q14494		Q9NQX5
Q7Z5Q1			Q86YL7	Q9NRA1					Q8NG08	Q14457		Q9NQW8
Q7Z4G4			Q86YH6	Q9NRA0					Q8NFZ0	Q14442		Q9NQS5
Q7Z478			Q86YB7	Q9NR81					Q8NFU7	Q14318		Q9NQS3
Q7Z417			Q86Y39	Q9NR80					Q8NFU5	Q14165		Q9NQR9
Q7Z3Z4			Q86Y07	Q9NR77					Q8NFM4	Q14108		Q9NQQ7
Q7Z3Z3			Q86XF0	Q9NR56					Q8NFF5	Q13724		Q9NQN1
Q7Z333			Q86XE5	Q9NR55					Q8NFD2	Q13586		Q9NQG1
Q7Z2W9			Q86XE3	Q9NR50					Q8NEV4	Q13563		Q9NQE7
Q7Z2W4			Q86X76	Q9NR46					Q8NEV1	Q13557		Q9NQC3
Q7Z2T5			Q86X67	Q9NR45					Q8NER5	Q13555		Q9NQA5
Q7Z2E3			Q86WW8	Q9NR30					Q8NER1	Q13554		Q9NQ90
Q7RTV0			Q86WV6	Q9NR28					Q8NEB9	Q13454		Q9NQ84
Q7LC44			Q86WU2	Q9NR21					Q8NE79	Q13445		Q9NQ60
Q7L8L6			Q86WG3	Q9NR19					Q8NE71	Q13438		Q9NQ40
Q7L7V1			Q86WA6	Q9NR12					Q8NE63	Q13393		Q9NQ34
Q7L576			Q86W56	Q9NR09					Q8NE62	Q13286		Q9NQ25
Q7L4I2			Q86VQ6	Q9NR00					Q8NE28	Q13261		Q9NQ11
Q7L2J0			Q86VP3	Q9NQX3					Q8NDV3	Q13224		Q9NPZ5
Q7L2E3			Q86VP1	Q9NQW7					Q8NDG6	Q13190		Q9NPY3
Q7L1Q6			Q86VD7	Q9NQW6					Q8ND71	Q13061		Q9NPU4
Q7L0Y3			Q86UV5	Q9NQV5					Q8NCW5	Q13023		Q9NPR9
Q7L014			Q86UT6	Q9NQU5					Q8NCM8	Q12981		Q9NPR2
Q7KZI7			Q86UD5	Q9NQT5					Q8NCB2	Q12959		Q9NPL8
Q7KZF4			Q86UB9	Q9NQT4					Q8NC60	Q12933		Q9NPJ1
Q7KZ85			Q86U90	Q9NQS7					Q8NC06	Q12912		Q9NPI9
Q76FK4			Q86U28	Q9NQS1					Q8NBZ7	Q12907		Q9NPI0
Q71UM5			Q86TW2	Q9NQR4					Q8NBU5	Q12879		Q9NPH5
Q71RC2			Q86TS9	Q9NQR1					Q8NB90	Q12797		Q9NPH3
Q702N8			Q86TL0	Q9NQP4					Q8NB78	Q12772		Q9NPG8
Q6ZUT6			Q86SX6	Q9NQL2					Q8NB49	Q12770		Q9NPG4
Q6ZU64			Q7Z7K0	Q9NQH7					Q8NB16	Q10472		Q9NPG1
Q6ZSC3			Q7Z7H8	Q9NQG7					Q8NAP3	Q10471		Q9NPF2
Q6ZRY4			Q7Z7F7	Q9NQC7					Q8N8V2	Q0P6D2		Q9NPF0
Q6ZRR7			Q7Z713	Q9NQA3					Q8N8L6	Q0GE19		Q9NPE6
Q6ZP01			Q7Z6Z7	Q9NQ92					Q8N8A6	Q09013		Q9NPD5
Q6ZN17			Q7Z6M4	Q9NQ88					Q8N884	Q08477		Q9NPC4
Q6ZN04			Q7Z5L4	Q9NQ86					Q8N841	Q07812		Q9NPC2
Q6YP21			Q7Z4Y8	Q9NQ66					Q8N752	Q07326		Q9NPC1
Q6Y7W6			Q7Z4T9	Q9NQ48					Q8N6T7	Q07065		Q9NPB9
Q6XE24			Q7Z4L0	Q9NQ39					Q8N6N7	Q06418		Q9NPB0
Q6UXG2			Q7Z449	Q9NQ38					Q8N6G6	Q06136		Q9NPA1
Q6UN15			Q7Z434	Q9NPP4					Q8N5S9	Q05586		Q9NPA0
Q6PKG0			Q7Z419	Q9NPJ8					Q8N568	Q04941		Q9NP99
Q6PK04			Q7Z3Z4	Q9NPJ4					Q8N4Z0	Q04721		Q9NP94
Q6PJT7			Q7Z3D6	Q9NPJ3					Q8N4T8	Q04671		Q9NP91
Q6PI48			Q7Z3C6	Q9NPJ1					Q8N4N8	Q04323		Q9NP85
Q6PF06			Q7Z2W9	Q9NPI6					Q8N4G2	Q03519		Q9NP84
Q6P6C2			Q7LG56	Q9NPI5					Q8N4C8	Q03518		Q9NP80
Q6P5R6			Q7L8L6	Q9NPI1					Q8N4C6	Q03405		Q9NP78
Q6P3W6			Q7L7V1	Q9NPH9					Q8N465	Q03135		Q9NP60
Q6P2Q9			Q7L5Y1	Q9NPH2					Q8N442	Q03001		Q9NP59
Q6P1L8			Q7L592	Q9NPG2					Q8N3Z3	Q02928		Q9NP58
Q6P161			Q7L4S7	Q9NPF5					Q8N3R9	Q02846		Q9NNZ3
Q6P158			Q7L4E1	Q9NPD3					Q8N3C0	Q02809		Q9NNX6
Q6P087			Q7L3V2	Q9NPB8					Q8N335	Q01740		Q9HDD0
Q6NZY4			Q7L3T8	Q9NPB6					Q8N2K1	Q00765		Q9HDC9
Q6NZI2			Q7L311	Q9NPA3					Q8N2I9	P98198		Q9HDC5
Q6NYC1			Q7L2E3	Q9NP90					Q8N2E6	P98196		Q9HD87
Q6NXG1			Q7L0Y3	Q9NP86					Q8N1T3	P98187		Q9HD45
Q6NWY9			Q7KZN9	Q9NP79					Q8N165	P84095		Q9HD43
Q6NTF7			Q7KZI7	Q9NP77					Q8N163	P80365		Q9HD36
Q6NSI4			Q76B58	Q9NP72					Q8N142	P79483		Q9HD23
Q6IS14			Q70HW3	Q9NP71					Q8N139	P78383		Q9HD20
Q6IQ49			Q70CQ3	Q9NP64					Q8N0W3	P78381		Q9HCX4
Q6IN84			Q709F0	Q9NP61					Q8IZY2	P78356		Q9HCU5
Q6IMN6			Q709C8	Q9NP59					Q8IZT8	P78329		Q9HCU4
Q6IBS0			Q6ZT89	Q9NP58					Q8IZL9	P69849		Q9HCU0
Q6I9Y2			Q6ZS86	Q9NP56					Q8IZE3	P68106		Q9HCS2
Q6DKI1			Q6ZN28	Q9NP31					Q8IZ41	P67812		Q9HCQ5
Q6AI08			Q6ZMR3	Q9NNW7					Q8IYT8	P63241		Q9HCP6
Q69YN4			Q6YP21	Q9NNW5					Q8IYT4	P63000		Q9HCP0
Q68D06			Q6YN16	Q9HDD0					Q8IYM1	P62987		Q9HCN6
Q68CQ4			Q6YFQ2	Q9HD67					Q8IYK8	P62979		Q9HCN3
Q66PJ3			Q6UXZ0	Q9HD47					Q8IYD8	P62942		Q9HCM3
Q659C4			Q6UXV4	Q9HD42					Q8IYD1	P62857		Q9HCM2
Q63ZY6			Q6UXP3	Q9HD40					Q8IYB8	P62854		Q9HCL2
Q5VZF2			Q6UXN7	Q9HD36					Q8IY84	P62341		Q9HCL0
Q5VZ19			Q6UX06	Q9HD34					Q8IY37	P62273		Q9HCK4
Q5VYS8			Q6UWS5	Q9HD15					Q8IY21	P61923		Q9HCJ2
Q5VWX1			Q6UW78	Q9HCS4					Q8IY18	P61803		Q9HCJ1
Q5VWP2			Q6UB35	Q9HCR9					Q8IXN7	P61769		Q9HCG7
Q5VV67			Q6UB28	Q9HCP0					Q8IXL6	P61619		Q9HCF6
Q5VTR2			Q6SZW1	Q9HCN4					Q8IXJ6	P61586		Q9HCE9
Q5VTL8			Q6QNY1	Q9HCM9					Q8IXI2	P61353		Q9HCC8
Q5VTE6			Q6Q0C1	Q9HCM4					Q8IXI1	P61165		Q9HC97
Q5U5Q3			Q6PML9	Q9HCK5					Q8IX18	P61026		Q9HC73
Q5TC82			Q6PIV7	Q9HCJ0					Q8IWU2	P61019		Q9HC58
Q5TAX3			Q6PI78	Q9HCG8					Q8IWT3	P61009		Q9HC56
Q5T8P6			Q6PI48	Q9HCG7					Q8IWQ3	P60953		Q9HC24
Q5T8I9			Q6PF06	Q9HCE7					Q8IWF2	P60763		Q9HC21
Q5T7N2			Q6PCB7	Q9HCE6					Q8IWB6	P60520		Q9HC10
Q5T764			Q6P5X7	Q9HCE1					Q8IWA4	P60468		Q9HC07
Q5T6F2			Q6P597	Q9HCC9					Q8IW45	P60059		Q9HBY0
Q5T653			Q6P587	Q9HCC0					Q8IW41	P59773		Q9HBX9
Q5T4I8			Q6P4H8	Q9HC98					Q8IW19	P58335		Q9HBX8
Q5T481			Q6P4F2	Q9HC96					Q8IVW4	P57727		Q9HBW9
Q5T440			Q6P4A7	Q9HC77					Q8IVW1	P57103		Q9HBW1
Q5T3I0			Q6P461	Q9HC62					Q8IVT5	P57088		Q9HBW0
Q5T280			Q6P444	Q9HC35					Q8IVS8	P57057		Q9HBV2
Q5T200			Q6P2C0	Q9HC29					Q8IVL1	P57054		Q9HBV1
Q5T1V6			Q6P1Q0	Q9HC16					Q8IVL0	P56962		Q9HBU9
Q5T160			Q6P1L8	Q9HC10					Q8IVH8	P56937		Q9HBT8
Q5SZQ8			Q6P161	Q9HBY8					Q8IVH4	P56557		Q9HBT6
Q5SY16			Q6P087	Q9HBU6					Q8IVF4	P55735		Q9HBR0
Q5RL73			Q6NZI2	Q9HBM1					Q8IV77	P55072		Q9HBM0
Q5RKV6			Q6NVY1	Q9HBM0					Q8IV63	P55061		Q9HBL7
Q5QJE6			Q6NUN0	Q9HBL8					Q8IV42	P54855		Q9HBL6
Q5PRF9			Q6NUK1	Q9HBK9					Q8IV36	P54829		Q9HBJ8
Q5JVS0			Q6NUI2	Q9HBJ7					Q8IUG5	P54252		Q9HBI6
Q5JVF3			Q6NSX1	Q9HBI1					Q8IUF1	P54219		Q9HBG7
Q5JTZ9			Q6L8Q7	Q9HBH5					Q8IUA7	P53992		Q9HBG4
Q5JTJ3			Q6KCM7	Q9HBH0					Q8IU85	P53816		Q9HBE5
Q5JTH9			Q6JQN1	Q9HB90					Q86Z02	P53621		Q9HBB8
Q5JSZ5			Q6J4K2	Q9HB75					Q86YV6	P53618		Q9HBA0
Q5JSQ8			Q6IPR1	Q9HB71					Q86YS6	P52961		Q9HB89
Q5JQF8			Q6IN84	Q9HB65					Q86YB8	P52292		Q9HB55
Q5JPH6			Q6IMN6	Q9HB40					Q86Y91	P51811		Q9HB29
Q5JNZ5			Q6ICL3	Q9HB21					Q86Y07	P51809		Q9HB15
Q5HYM0			Q6IC98	Q9HB20					Q86XP3	P51793		Q9HB14
Q5H9U9			Q6IB77	Q9HAZ2					Q86XP1	P51648		Q9HB03
Q5F1R6			Q6GPH4	Q9HAY6					Q86XH1	P51589		Q9HAW9
Q5D1E8			Q6FI81	Q9HAV4					Q86XF0	P51572		Q9HAW8
Q5D0E6			Q6EMK4	Q9HAV0					Q86WV6	P51571		Q9HAW7
Q5C9Z4			Q6DKK2	Q9HAU5					Q86WU2	P51151		Q9HAV5
Q5BKZ1			Q6BCY4	Q9HAU4					Q86WJ1	P50851		Q9HAT1
Q5BKY9			Q69YU5	Q9HAU0					Q86WI3	P49895		Q9HAS3
Q58A45			Q69YI7	Q9HAT8					Q86WA8	P49810		Q9HAR2
Q587J8			Q68DD2	Q9HAB8					Q86W28	P49755		Q9HAB3
Q53R41			Q68CK6	Q9HA65					Q86W26	P49662		Q9HA82
Q53HI1			Q63ZY3	Q9HA64					Q86W25	P49585		Q9HA72
Q53H82			Q5XKP0	Q9HA47					Q86W24	P49458		Q9H9V4
Q53F19			Q5VUM1	Q9H9Z2					Q86VQ6	P49326		Q9H9S5
Q53EP0			Q5VTU8	Q9H9Y6					Q86VH2	P49257		Q9H9S3
Q53EL6			Q5VT66	Q9H9T3					Q86V86	P49069		Q9H9P8
Q52LJ0			Q5U5X0	Q9H9S5					Q86V21	P48739		Q9H9P2
Q4VXU2			Q5U4N7	Q9H9S4					Q86UX6	P48651		Q9H9K5
Q4VXA5			Q5TYM5	Q9H9Q2					Q86UW6	P48449		Q9H9B4
Q4G0J3			Q5TH74	Q9H9P5					Q86UT6	P48444		Q9H9B1
Q3ZCQ8			Q5TGZ0	Q9H9P2					Q86UQ4	P47712		Q9H936
Q3MIT2			Q5TEU4	Q9H9L4					Q86UK0	P46977		Q9H920
Q3KNT7			Q5TC12	Q9H9J4					Q86UE8	P46531		Q9H902
Q32P51			Q5TAQ9	Q9H9G7					Q86TW2	P45844		Q9H8X9
Q32MZ4			Q5T9G4	Q9H9E3					Q86TM3	P43308		Q9H8P0
Q2VPK5			Q5T9A4	Q9H9E1					Q86TH1	P43307		Q9H8M9
Q2VIR3			Q5T890	Q9H9A5					Q86TD4	P42857		Q9H8M5
Q2Q1W2			Q5T653	Q9H999					Q86TB3	P42345		Q9H8J5
Q2NL82			Q5T440	Q9H992					Q86T24	P42262		Q9H8H3
Q2M296			Q5T2R2	Q9H939					Q86SG6	P42261		Q9H841
Q1KMD3			Q5T2N8	Q9H910					Q7Z7L1	P41222		Q9H819
Q1ED39			Q5T1J5	Q9H900					Q7Z7E8	P40967		Q9H813
Q17RY0			Q5T1C6	Q9H8X2					Q7Z7A4	P40305		Q9H7Z7
Q16891			Q5T160	Q9H8W5					Q7Z6P3	P39656		Q9H7X2
Q16762			Q5SZD4	Q9H8V3					Q7Z695	P38484		Q9H7V2
Q16666			Q5SXM8	Q9H8T0					Q7Z4S6	P38435		Q9H7T0
Q16658			Q5SVS4	Q9H8S9					Q7Z478	P37287		Q9H7M9
Q16637			Q5ST30	Q9H8N7					Q7Z444	P37268		Q9H7F4
Q16630			Q5SRD1	Q9H867					Q7Z406	P37059		Q9H7F0
Q16629			Q5S007	Q9H840					Q7Z333	P37058		Q9H799
Q16600			Q5RI15	Q9H832					Q7Z2Z2	P36956		Q9H756
Q16587			Q5K4L6	Q9H814					Q7Z2Y8	P36537		Q9H741
Q16576			Q5JTZ9	Q9H7Z7					Q7Z2Y5	P36383		Q9H720
Q16560			Q5JTJ3	Q9H7P9					Q7RTR2	P35613		Q9H6Y7
Q16540			Q5JRX3	Q9H7P6					Q7RTR0	P35610		Q9H6X4
Q16513			Q5JPH6	Q9H7L9					Q7RTP6	P35606		Q9H6X2
Q16206			Q5HYK3	Q9H7E2					Q7RTN6	P35575		Q9H6U8
Q15942			Q5HYI7	Q9H7D7					Q7LFX5	P35504		Q9H6R6
Q15910			Q5H9E4	Q9H7D0					Q7LFL8	P35503		Q9H6L5
Q15797			Q5FVE4	Q9H7C4					Q7L8W6	P35354		Q9H6L2
Q15717			Q5EBM0	Q9H7B4					Q7L7X3	P35247		Q9H6H4
Q15696			Q5BKY1	Q9H790					Q7L7V1	P33947		Q9H6F2
Q15695			Q58FF3	Q9H788					Q7L523	P33897		Q9H6D8
Q15691			Q587J8	Q9H777					Q7L3T8	P33261		Q9H6D3
Q15654			Q567V2	Q9H773					Q7L2E3	P33260		Q9H6B9
Q15646			Q562E7	Q9H765					Q7L0Q8	P33121		Q9H6B4
Q15637			Q53T59	Q9H6Z9					Q7L014	P32754		Q9H6A9
Q15633			Q53S58	Q9H6Y7					Q7KZI7	P31689		Q9H665
Q15631			Q53S33	Q9H6X4					Q76MJ5	P31513		Q9H607
Q15477			Q53R41	Q9H6T3					Q75WM6	P31512		Q9H5Y7
Q15459			Q53H82	Q9H6S3					Q71U36	P31415		Q9H5V8
Q15435			Q53H12	Q9H6R0					Q712K3	P31213		Q9H5K3
Q15434			Q53FZ2	Q9H6Q3					Q709F0	P30874		Q9H5I5
Q15428			Q4VC39	Q9H6P5					Q6ZWH5	P30872		Q9H598
Q15427			Q4VC31	Q9H6K1					Q6ZW61	P30626		Q9H553
Q15424			Q4U2R6	Q9H6E5					Q6ZVT0	P30519		Q9H4I9
Q15415			Q4LE39	Q9H6E4					Q6ZUV0	P30511		Q9H4F1
Q15397			Q4G176	Q9H6D7					Q6ZU15	P30101		Q9H4D0
Q15393			Q4G0S4	Q9H6A0					Q6ZT98	P29590		Q9H490
Q15366			Q4G0N4	Q9H672					Q6ZS86	P29401		Q9H461
Q15365			Q4G0I0	Q9H5X1					Q6ZRS2	P28845		Q9H427
Q15287			Q49B96	Q9H5N1					Q6ZR08	P27824		Q9H400
Q15269			Q49AN0	Q9H5J8					Q6ZNW5	P27797		Q9H3W5
Q15233			Q49AM1	Q9H4Y5					Q6ZN66	P27544		Q9H3V2
Q15149			Q494U1	Q9H4X1					Q6ZN16	P27169		Q9H3U7
Q15061			Q3ZCQ8	Q9H4P4					Q6ZMV9	P26885		Q9H3U5
Q15056			Q3SY69	Q9H4M3					Q6ZMQ8	P26678		Q9H3T3
Q15050			Q3SY17	Q9H4L5					Q6XUX3	P26439		Q9H3T2
Q15046			Q3SXM5	Q9H4H8					Q6VAB6	P25686		Q9H3S5
Q15032			Q3MIT2	Q9H4G0					Q6UXM1	P25092		Q9H3S3
Q15029			Q3KRB8	Q9H4E7					Q6UWP2	P24903		Q9H3S1
Q15024			Q3KQZ1	Q9H4B6					Q6UVM3	P24557		Q9H3R2
Q15022			Q38SD2	Q9H4A6					Q6UB35	P24462		Q9H3R1
Q15020			Q330K2	Q9H4A5					Q6T311	P24390		Q9H3Q3
Q14CZ7			Q32P41	Q9H4A3					Q6T310	P23327		Q9H3N8
Q14978			Q32NB8	Q9H492					Q6SA08	P23219		Q9H3N1
Q14974			Q2VYF4	Q9H479					Q6PL18	P22760		Q9H3M0
Q14966			Q2TB90	Q9H477					Q6PK57	P22680		Q9H3K2
Q14789			Q2QL34	Q9H469					Q6PIY7	P22314		Q9H3H5
Q14739			Q2M3C7	Q9H467					Q6PIW4	P22310		Q9H3E2
Q14699			Q2LD37	Q9H444					Q6PIF6	P22309		Q9H346
Q14697			Q18PE1	Q9H425					Q6PI48	P22059		Q9H344
Q14694			Q16891	Q9H422					Q6PHW0	P21817		Q9H343
Q14692			Q16881	Q9H410					Q6PHR2	P21728		Q9H342
Q14690			Q16854	Q9H3Z4					Q6PFW1	P20853		Q9H341
Q14684			Q16836	Q9H3Y6					Q6PEY2	P20815		Q9H340
Q14683			Q16822	Q9H3U1					Q6PCB7	P20813		Q9H339
Q14671			Q16798	Q9H3S7					Q6P9H5	P20591		Q9H330
Q14576			Q16795	Q9H3S4					Q6P5Z2	P20340		Q9H313
Q14562			Q16775	Q9H3R5					Q6P461	P20309		Q9H310
Q14527			Q16773	Q9H3R2					Q6P3W7	P20292		Q9H300
Q14498			Q16762	Q9H3Q1					Q6P3R8	P20073		Q9H2Y9
Q14493			Q16740	Q9H3P2					Q6P2M8	P20036		Q9H2X9
Q14451			Q16719	Q9H3M9					Q6P1R4	P19634		Q9H2X8
Q14444			Q16718	Q9H3M7					Q6P1M0	P19224		Q9H2X3
Q14331			Q16698	Q9H3L0					Q6P158	P18850		Q9H2W1
Q14320			Q16678	Q9H3K6					Q6P0Q8	P18405		Q9H2V7
Q14296			Q16654	Q9H3F6					Q6NXR0	P18031		Q9H2U9
Q14258			Q16635	Q9H361					Q6NUN0	P17861		Q9H2U1
Q14240			Q16595	Q9H347					Q6NUM6	P17693		Q9H2S6
Q14204			Q16548	Q9H329					Q6JQN1	P17302		Q9H2S1
Q14157			Q16540	Q9H2Y7					Q6J9G0	P16662		Q9H2L4
Q14152			Q16526	Q9H2U1					Q6IQ55	P16615		Q9H2J7
Q14151			Q16134	Q9H2P9					Q6IQ22	P16435		Q9H2H9
Q14149			Q15916	Q9H2M9					Q6IMI6	P16389		Q9H2H8
Q14147			Q15842	Q9H2M3					Q6IBS0	P16234		Q9H2F3
Q14137			Q15831	Q9H2K2					Q6IA69	P15813		Q9H2E6
Q14103			Q15818	Q9H2J4					Q6EMB2	P15538		Q9H2D1
Q14011			Q15785	Q9H2G2					Q6DT37	P15514		Q9H2C8
Q14004			Q15526	Q9H2C0					Q6DD88	P15328		Q9H2C5
Q13901			Q15390	Q9H2A2					Q6BCY4	P15153		Q9H2C2
Q13895			Q15388	Q9H299					Q6A1A2	P14625		Q9H2B4
Q13868			Q15311	Q9H267					Q68D06	P14555		Q9H2B2
Q13838			Q15303	Q9H257					Q68CK6	P14060		Q9H2A9
Q13825			Q15165	Q9H254					Q68CJ6	P13987		Q9H2A7
Q13823			Q15149	Q9H227					Q687X5	P13762		Q9H295
Q13769			Q15120	Q9H1Y0					Q63HN8	P13747		Q9H255
Q13686			Q15119	Q9H1R2					Q5XG87	P13584		Q9H252
Q13601			Q15118	Q9H1P3					Q5VZM2	P13569		Q9H251
Q13595			Q15070	Q9H1K1					Q5VYX0	P13498		Q9H244
Q13573			Q15046	Q9H1K0					Q5VVX9	P11801		Q9H237
Q13523			Q15031	Q9H1J1					Q5VTY9	P11712		Q9H228
Q13442			Q14CZ7	Q9H1I8					Q5VTE0	P11686		Q9H222
Q13435			Q14894	Q9H1D9					Q5VT25	P11511		Q9H221
Q13428			Q14849	Q9H1A4					Q5VST9	P11509		Q9H210
Q13427			Q14790	Q9H190					Q5TCY1	P11021		Q9H209
Q13425			Q14693	Q9H171					Q5TCX8	P10635		Q9H208
Q13395			Q14689	Q9H165					Q5TCS8	P10632		Q9H207
Q13347			Q14667	Q9H0Z9					Q5TCQ9	P10620		Q9H205
Q13325			Q14653	Q9H0Y0					Q5T9C9	P10415		Q9H1Z9
Q13310			Q14596	Q9H0X9					Q5T9A4	P10321		Q9H1Y3
Q13285			Q14457	Q9H0X6					Q5T8D3	P0DTE5		Q9H1V8
Q13283			Q14410	Q9H0W8					Q5T890	P0DTE4		Q9H1U9
Q13263			Q14409	Q9H0W5					Q5T7B8	P0DN84		Q9H1U4
Q13247			Q14397	Q9H0U4					Q5T6J7	P0DMT0		Q9H1N7
Q13243			Q14318	Q9H0R8					Q5T3U5	P0CG48		Q9H1K4
Q13242			Q14296	Q9H0R5					Q5T2N8	P0CG47		Q9H1E5
Q13206			Q14249	Q9H0R1					Q5T1V6	P0CG41		Q9H1D0
Q13151			Q14197	Q9H0P0					Q5T160	P0C7V7		Q9H1C7
Q13148			Q14164	Q9H0N0					Q5SY16	P0C7M3		Q9H1C4
Q13117			Q14154	Q9H0M0					Q5ST30	P0C6T2		Q9H1C3
Q13084			Q14142	Q9H0H5					Q5S007	P09936		Q9H1C0
Q13064			Q14061	Q9H0H3					Q5RIA9	P09601		Q9H1B5
Q13049			Q13875	Q9H0F6					Q5MY95	P08842		Q9H195
Q12996			Q13825	Q9H0E9					Q5MAI5	P08754		Q9H172
Q12986			Q13794	Q9H0E2					Q5KSL6	P08686		Q9H159
Q12972			Q13686	Q9H0C5					Q5K4L6	P08684		Q9H158
Q12931			Q13637	Q9H0B6					Q5JZY3	P08240		Q9H156
Q12926			Q13546	Q9H0A8					Q5JTZ9	P08235		Q9H0X9
Q12906			Q13505	Q9H0A6					Q5JTY5	P08134		Q9H0X4
Q12905			Q13501	Q9H095					Q5JT25	P08034		Q9H0V9
Q12904			Q13472	Q9H089					Q5JPH6	P07988		Q9H0V1
Q12874			Q13454	Q9H081					Q5HYI8	P07225		Q9H0U3
Q12873			Q13423	Q9H074					Q5HY92	P07099		Q9H0R3
Q12872			Q13405	Q9H063					Q5H9U9	P06493		Q9H0Q3
Q12849			Q13342	Q9H008					Q5H913	P06133		Q9H0H0
Q12788			Q13323	Q9GZZ9					Q5FWF4	P05981		Q9H0C3
Q10589			Q13268	Q9GZZ1					Q5FVE4	P05538		Q9H0C2
Q10570			Q13227	Q9GZY4					Q5EBM0	P05181		Q9H0A3
Q0WX57			Q13148	Q9GZY1					Q5D0E6	P05177		Q9H061
Q09666			Q13114	Q9GZY0					Q59H18	P05093		Q9H015
Q09472			Q13085	Q9GZX7					Q58FG1	P04844		Q9H013
Q09161			Q13084	Q9GZV5					Q58FG0	P04843		Q9GZZ6
Q08J23			Q13057	Q9GZV4					Q58FF8	P04839		Q9GZY8
Q08945			Q13011	Q9GZV1					Q58FF7	P04440		Q9GZY6
Q08257			Q12983	Q9GZT9					Q58FF6	P04439		Q9GZY4
Q08211			Q12981	Q9GZT4					Q58FF3	P04233		Q9GZX3
Q08170			Q12931	Q9GZS3					Q58A45	P04114		Q9GZW8
Q07955			Q12906	Q9GZR1					Q587J7	P04035		Q9GZV3
Q07954			Q12887	Q9GZQ8					Q56UN5	P01920		Q9GZU3
Q07687			Q12849	Q9GZQ3					Q562R1	P01911		Q9GZU1
Q07666			Q12800	Q9GZP8					Q53S08	P01909		Q9GZT6
Q07065			Q12778	Q9GZM8					Q53H12	P01906		Q9GZS9
Q07021			Q10713	Q9C0K7					Q53G44	P01903		Q9GZR5
Q07020			Q09428	Q9C0I1					Q53FZ2	P01893		Q9GZQ6
Q06945			Q09161	Q9C0H5					Q53FA7	P01889		Q9GZQ4
Q06830			Q09013	Q9C0F3					Q52WX2	P01730		Q9GZP9
Q06787			Q08J23	Q9C0E4					Q504Y2	P01135		Q9GZP7
Q06265			Q08AH3	Q9C0E2					Q4VNC1	P01116		Q9GZP1
Q05923			Q08AH1	Q9C0D2					Q4VNC0	P01112		Q9GZN6
Q05823			Q08AE8	Q9C0D0					Q4V339	P01111		Q9GZN0
Q05707			Q07973	Q9C0C9					Q4L235	P00533		Q9GZM6
Q05519			Q07820	Q9C0C7					Q4G176	P00387		Q9GZM5
Q05193			Q07812	Q9C0C6					Q4G0Z9	P00167		Q9GZK7
Q05048			Q07021	Q9C0C2					Q4G0N4	O95992		Q9GZK6
Q04837			Q06945	Q9C0B1					Q49AN0	O95954		Q9GZK4
Q04637			Q06609	Q9C075					Q49A26	O95864		Q9GZK3
Q03989			Q06416	Q9C037					Q499Z3	O95772		Q9GIP4
Q03701			Q06055	Q9C035					Q496M5	O95674		Q9C0K7
Q02978			Q05932	Q9C030					Q460N5	O95573		Q9C0K1
Q02878			Q05823	Q9C004					Q460N3	O95487		Q9C0J1
Q02790			Q05195	Q9C000					Q3ZCM7	O95486		Q9C0I4
Q02543			Q04837	Q9BZY9					Q3YEC7	O95477		Q9C0H2
Q02252			Q03393	Q9BZX2					Q3SXZ7	O95476		Q9C0E8
Q02040			Q02978	Q9BZV1					Q3SXY8	O95470		Q9C0D9
Q01860			Q02790	Q9BZR9					Q3LXA3	O95427		Q9C0C4
Q01844			Q02750	Q9BZR8					Q3L8U1	O95406		Q9C0B7
Q01804			Q02338	Q9BZQ8					Q3B7J2	O95292		Q9C0B5
Q01780			Q02318	Q9BZQ4					Q38SD2	O95278		Q9C0B1
Q01130			Q02252	Q9BZM6					Q32NB8	O95267		Q9C0A0
Q01085			Q02221	Q9BZM2					Q32MK0	O95255		Q9C091
Q01082			Q02218	Q9BZL6					Q2VIR3	O95248		Q9C002
Q01081			Q02127	Q9BZJ6					Q2VIQ3	O95237		Q9BZZ2
Q00987			Q01860	Q9BZI7					Q2TB90	O95210		Q9BZW8
Q00839			Q01831	Q9BZH6					Q2TAC6	O95197		Q9BZW5
Q00688			Q01664	Q9BZG8					Q2NL82	O95196		Q9BZW4
Q00610			Q01484	Q9BZF9					Q2NKX8	O95070		Q9BZW2
Q00577			Q01167	Q9BZF3					Q2M3G0	O95069		Q9BZV3
Q00341			Q00G26	Q9BZF2					Q2M2I8	O94985		Q9BZV2
Q00059			Q00796	Q9BZF1					Q2M1P5	O94979		Q9BZR6
P98179			Q00325	Q9BZE9					Q2KJY2	O94966		Q9BZL3
P98175			Q00059	Q9BZE4					Q16881	O94905		Q9BZJ8
P84103			Q00005	Q9BZE2					Q16877	O94888		Q9BZJ7
P84098			P99999	Q9BZD4					Q16875	O94876		Q9BZJ6
P84090			P86397	Q9BZB8					Q16854	O94874		Q9BZJ4
P84077			P83111	Q9BZ72					Q16851	O94855		Q9BZG2
P83881			P82970	Q9BZ71					Q16836	O94850		Q9BZF1
P83731			P82933	Q9BZ67					Q16832	O94823		Q9BZD7
P83369			P82932	Q9BZ29					Q16822	O94778		Q9BZD6
P82979			P82930	Q9BZ23					Q16816	O94777		Q9BZD2
P82970			P82921	Q9BYX7					Q16798	O76062		Q9BZC7
P82933			P82914	Q9BYX4					Q16774	O76024		Q9BZC5
P82932			P82912	Q9BYX2					Q16763	O75915		Q9BZA8
P82921			P82909	Q9BYV9					Q16760	O75911		Q9BZA7
P82914			P82675	Q9BYV8					Q16720	O75908		Q9BZ97
P82912			P82673	Q9BYU5					Q16698	O75907		Q9BZ76
P82675			P82664	Q9BYT8					Q16671	O75900		Q9BZ23
P82673			P82663	Q9BYT5					Q16659	O75881		Q9BZ11
P81605			P82650	Q9BYS1					Q16654	O75845		Q9BYW1
P79522			P80404	Q9BYR9					Q16644	O75844		Q9BYT9
P78563			P78549	Q9BYR8					Q16620	O75807		Q9BYT1
P78527			P78540	Q9BYR7					Q16584	O75795		Q9BYH1
P78406			P78537	Q9BYR6					Q16566	O75787		Q9BYG8
P78362			P78352	Q9BYR5					Q16526	O75631		Q9BYG0
P78346			P67775	Q9BYR4					Q16513	O75477		Q9BYF1
P78345			P63244	Q9BYR3					Q16512	O75460		Q9BYE9
P78344			P63167	Q9BYR2					Q16288	O75452		Q9BYE2
P78332			P62987	Q9BYR0					Q16281	O75396		Q9BYC5
P78316			P62979	Q9BYQ9					Q16280	O75387		Q9BY79
P68371			P62072	Q9BYQ9					Q16181	O75385		Q9BY78
P68363			P61764	Q9BYQ8					Q16134	O75352		Q9BY71
P68104			P61604	Q9BYQ7					Q15907	O75340		Q9BY67
P68036			P61221	Q9BYQ6					Q15842	O75310		Q9BY64
P67809			P60602	Q9BYQ5					Q15835	O75298		Q9BY50
P63279			P59942	Q9BYQ4					Q15831	O75143		Q9BY21
P63244			P59103	Q9BYQ3					Q15777	O75069		Q9BY19
P63241			P59047	Q9BYQ2					Q15772	O75052		Q9BY15
P63220			P58004	Q9BYQ0					Q15771	O60858		Q9BY10
P63173			P57729	Q9BYP9					Q15759	O60774		Q9BY08
P63165			P57105	Q9BYP8					Q15746	O60762		Q9BY07
P63162			P57103	Q9BYN0					Q15722	O60725		Q9BXU9
P63136			P56962	Q9BYM8					Q15669	O60662		Q9BXT2
P63135			P56693	Q9BYK8					Q15645	O60656		Q9BXS9
P63133			P56556	Q9BYJ4					Q15569	O60568		Q9BXS4
P63132			P56385	Q9BYJ1					Q15477	O60488		Q9BXS0
P63128			P56381	Q9BYI3					Q15418	O60427		Q9BXR5
P63124			P56378	Q9BYG8					Q15392	O60423		Q9BXR3
P63104			P56277	Q9BYG5					Q15382	O60353		Q9BXP2
P62995			P56181	Q9BYG4					Q15375	O60337		Q9BXN2
P62993			P56134	Q9BYE4					Q15349	O60312		Q9BXM9
P62979			P55957	Q9BYE3					Q15311	O43909		Q9BXM7
P62945			P55916	Q9BY84					Q15303	O43889		Q9BXK5
P62937			P55851	Q9BY77					Q15286	O43865		Q9BXJ8
P62917			P55809	Q9BY60					Q15257	O43852		Q9BXJ7
P62913			P55789	Q9BY49					Q15208	O43826		Q9BXJ1
P62910			P55212	Q9BY44					Q15139	O43731		Q9BXI9
P62906			P55211	Q9BY43					Q15131	O43688		Q9BXI2
P62899			P55084	Q9BY32					Q15126	O43681		Q9BXE9
P62891			P55061	Q9BY12					Q15120	O43567		Q9BXC1
P62888			P54886	Q9BY11					Q15119	O43464		Q9BXC0
P62857			P54868	Q9BXW9					Q15118	O43402		Q9BXB1
P62854			P54819	Q9BXW6					Q15067	O43323		Q9BXA5
P62851			P54764	Q9BXW4					Q15058	O43292		Q9BX97
P62847			P54687	Q9BXV9					Q15046	O43264		Q9BX95
P62841			P54296	Q9BXU7					Q15031	O43174		Q9BX84
P62829			P54257	Q9BXT6					Q15029	O43164		Q9BX79
P62826			P54252	Q9BXS9					Q15019	O43155		Q9BX74
P62805			P54098	Q9BXS5					Q149N8	O15533		Q9BX73
P62753			P53816	Q9BXS1					Q149M9	O15503		Q9BX67
P62750			P53779	Q9BXP8					Q14978	O15455		Q9BX59
P62701			P53778	Q9BXM7					Q14964	O15399		Q9BWV2
P62683			P53701	Q9BXL8					Q14894	O15354		Q9BWV1
P62633			P53597	Q9BXL7					Q14839	O15303		Q9BWQ8
P62495			P53370	Q9BXL6					Q14807	O15270		Q9BWQ6
P62487			P53007	Q9BXJ9					Q14739	O15269		Q9BWM7
P62424			P52888	Q9BXI6					Q14722	O15260		Q9BWL3
P62328			P52815	Q9BXI3					Q14692	O15155		Q9BWH2
P62318			P52790	Q9BXH1					Q14683	O15121		Q9BWG4
P62316			P52789	Q9BXD5					Q14680	O15027		Q9BW72
P62314			P52758	Q9BXC9					Q14679	O14983		Q9BW60
P62312			P52306	Q9BXB5					Q14654	O14975		Q9BVX2
P62310			P51970	Q9BXB4					Q14568	O14967		Q9BVW6
P62308			P51687	Q9BX70					Q14566	O14958		Q9BVV8
P62306			P51649	Q9BX66					Q14565	O14939		Q9BVV7
P62304			P51572	Q9BX46					Q14562	O14880		Q9BVT8
P62280			P51553	Q9BWX1					Q14534	O14827		Q9BVK8
P62277			P51530	Q9BWU1					Q14527	O14735		Q9BVK6
P62273			P51398	Q9BWT3					Q14444	O14684		Q9BVK2
P62269			P51149	Q9BWT1					Q14410	O14681		Q9BVI4
P62266			P50747	Q9BWL3					Q14409	O14678		Q9BVH7
P62263			P50583	Q9BWF3					Q14344	O14656		Q9BVG9
P62258			P50542	Q9BWD1					Q14296	O14653		Q9BVC6
P62249			P50440	Q9BWC9					Q14289	O14579		Q9BVA6
P62244			P50416	Q9BW27					Q14240	O14569		Q9BV87
P62241			P50336	Q9BW04					Q14204	O14523		Q9BV81
P62191			P50213	Q9BVS4					Q14191	O14495		Q9BV40
P62081			P49916	Q9BVN2					Q14166	O00767		Q9BV35
P61981			P49914	Q9BVM4					Q14164	O00631		Q9BV23
P61978			P49901	Q9BVK8					Q14147	O00562		Q9BV10
P61956			P49841	Q9BVJ7					Q14141	O00560		Q9BUV8
P61927			P49840	Q9BVJ6					Q14088	O00519		Q9BUR5
P61764			P49821	Q9BVI0					Q14028	O00476		Q9BUN8
P61604			P49810	Q9BVG3					Q14012	O00469		Q9BUM1
P61578			P49789	Q9BVC4					Q14004	O00429		Q9BUJ0
P61513			P49753	Q9BVA0					Q13976	O00401		Q9BUF7
P61353			P49748	Q9BV90					Q13956	O00400		Q9BUB7
P61326			P49675	Q9BV86					Q13950	O00264		Q9BU79
P61313			P49662	Q9BV73					Q13885	O00258		Q9BU23
P61254			P49590	Q9BV68					Q13882	O00237		Q9BTX3
P61247			P49588	Q9BV57					Q13873	O00144		Q9BTX1
P61129			P49448	Q9BV44					Q13838	O00141		Q9BTV4
P61088			P49419	Q9BV40					Q13823	O00124		Q9BTU6
P61011			P49411	Q9BV20					Q13795	F2Z3D1		Q9BTN0
P60900			P49406	Q9BUZ4					Q13761	C9JXX5		Q9BTE7
P60866			P49281	Q9BUX1					Q13733	B0YJ81		Q9BTD3
P60842			P48735	Q9BUV8					Q13705	A8MWK0		Q9BT88
P60484			P48728	Q9BUT1					Q13637	A8CG34		Q9BT76
P60468			P48506	Q9BUR5					Q13636	A7KAX9		Q9BT67
P60323			P48454	Q9BUR4					Q13627	A6NNS2		Q9BT22
P60321			P48201	Q9BUP3					Q13608	A6NJY4		Q9BSR8
P60228			P48200	Q9BUL8					Q13574	A6NG13		Q9BSN7
P59045			P48163	Q9BUK6					Q13572	A5PLL7		Q9BSK2
P59044			P48047	Q9BUI4					Q13569	A5D6W6		Q9BSK0
P58107			P47985	Q9BUB5					Q13557	A4FU28		Q9BSJ8
P57772			P47900	Q9BUA6					Q13555	A4D2H0		Q9BSJ5
P57723			P47897	Q9BU89					Q13554	A4D256		Q9BSF4
P57721			P47712	Q9BU64					Q13546	A2RU30		Q9BSE4
P57052			P46695	Q9BU02					Q13535	A2RRP1		Q9BSE2
P56270			P46199	Q9BTZ2					Q13523	A1LV06		Q9BSA9
P56192			P45984	Q9BTU6					Q13509	A1L3X0		Q9BSA4
P56182			P45983	Q9BTT6					Q13470	A1L0T0		Q9BS91
P56181			P45954	Q9BTM9					Q13464	A1A4Y4		Q9BS86
P55884			P45880	Q9BTE3					Q13459	A0PJX4		Q9BRY0
P55795			P45844	Q9BTE1					Q13423	A0N0X8		Q9BRV3
P55769			P43897	Q9BT92					Q13418	A0FGR9		Q9BRR6
P55265			P43304	Q9BT78					Q13415	A0FGR8		Q9BRR3
P55263			P43251	Q9BT43					Q13402	A0AVI4		Q9BRQ8
P55210			P43155	Q9BT40					Q13394	A0A2R8Y4M4		Q9BRQ6
P55209			P42765	Q9BT25					Q13363	A0A1B0GTQ4		Q9BRQ5
P55145			P42704	Q9BT23					Q13315	A0A1B0GTB2		Q9BRP4
P55084			P42575	Q9BSU3					Q13308	A0A0S2Z5U8		Q9BRN9
P55081			P42345	Q9BST9					Q13283	A0A024RD35		Q9BRL7
P55072			P42126	Q9BSL1					Q13237	A0A024R8I7		Q9BRK3
P55039			P41970	Q9BSK4					Q13233	A0A024R6A3		Q9BRK0
P55036			P41250	Q9BSJ2					Q13232			Q9BRI3
P55010			P41247	Q9BSB4					Q13206			Q9BRB3
P54886			P41220	Q9BS16					Q13188			Q9BR39
P54577			P40939	Q9BRZ2					Q13177			Q9BR26
P54253			P40926	Q9BRX2					Q13164			Q9BR10
P54136			P40337	Q9BRV8					Q13163			Q9BQT9
P54105			P40305	Q9BRT3					Q13153			Q9BQT8
P53999			P39748	Q9BRS2					Q13131			Q9BQS7
P53597			P39210	Q9BRR9					Q13085			Q9BQS2
P53041			P38646	Q9BRQ8					Q13075			Q9BQQ7
P52948			P38117	Q9BRQ6					Q13057			Q9BQJ4
P52815			P37840	Q9BRP8					Q13043			Q9BQI7
P52758			P36969	Q9BRL6					Q13017			Q9BQG1
P52756			P36957	Q9BRK4					Q12965			Q9BQE5
P52597			P36873	Q9BRG1					Q12931			Q9BQE4
P52594			P36639	Q9BRF8					Q12882			Q9BQD7
P52298			P36551	Q9BRC7					Q12873			Q9BQB6
P52292			P36542	Q9BRA2					Q12866			Q9BQA9
P52272			P36507	Q9BR76					Q12852			Q9BQ51
P51991			P36404	Q9BR61					Q12851			Q9BQ49
P51858			P35914	Q9BR09					Q12840			Q9BQ31
P51843			P35754	Q9BR01					Q12829			Q9BPX6
P51816			P35670	Q9BQS6					Q12792			Q9BPW9
P51608			P35613	Q9BQL6					Q12774			Q9BPV8
P51532			P35557	Q9BQI5					Q12756			Q99999
P51530			P35232	Q9BQI3					Q0VDF9			Q99996
P51513			P35218	Q9BQC3					Q0VDD8			Q99986
P51398			P34932	Q9BQA1					Q0P5N6			Q99985
P51116			P34931	Q9BQ95					Q09428			Q99965
P51114			P34897	Q9BQ90					Q09013			Q99959
P51003			P33897	Q9BQ89					Q08AH3			Q99946
P50995			P33316	Q9BQ67					Q08AH1			Q99943
P50991			P33176	Q9BQ66					Q08AF3			Q99942
P50914			P33121	Q9BQ52					Q08881			Q99941
P50750			P32418	Q9BQ31					Q08828			Q99928
P50579			P32322	Q9BQ15					Q08499			Q99884
P50454			P32248	Q9BQ04					Q08462			Q99835
P50395			P32189	Q9BPZ7					Q08426			Q99808
P49792			P31944	Q9BPZ2					Q08345			Q99805
P49761			P31937	Q9BPX3					Q08257			Q99795
P49756			P31930	Q9BPX1					Q08211			Q99788
P49750			P31749	Q9BPU9					Q07912			Q99758
P49674			P31689	Q9BPU6					Q07864			Q99735
P49591			P31415	Q99996					Q07617			Q99732
P49590			P31327	Q99986					Q07343			Q99726
P49589			P31040	Q99966					Q07002			Q99720
P49588			P30989	Q99962					Q06609			Q99712
P49458			P30837	Q99961					Q06520			Q99706
P49411			P30536	Q99956					Q06418			Q99705
P49368			P30520	Q99952					Q06278			Q99680
P49207			P30419	Q99933					Q06187			Q99679
P48643			P30405	Q99880					Q05932			Q99678
P48634			P30307	Q99879					Q05923			Q99677
P48444			P30153	Q99877					Q05823			Q99675
P48436			P30084	Q99873					Q05639			Q99665
P48431			P30049	Q99871					Q05513			Q99650
P48200			P30048	Q99865					Q05397			Q99643
P47974			P30044	Q99856					Q05193			Q99624
P47914			P30041	Q99836					Q04912			Q99603
P47813			P30038	Q99832					Q04771			Q99595
P46783			P29803	Q99829					Q04759			Q99572
P46782			P29475	Q99819					Q04656			Q99571
P46781			P29372	Q99816					Q04637			Q99536
P46779			P29353	Q99814					Q03519			Q99527
P46778			P28482	Q99801					Q03518			Q99523
P46777			P28331	Q99798					Q03468			Q99518
P46776			P28330	Q99759					Q03426			Q99500
P46199			P28288	Q99755					Q03113			Q99467
P46109			P28072	Q99743					Q02880			Q99466
P46087			P28070	Q99741					Q02846			Q99463
P46060			P27707	Q99720					Q02790			Q99442
P46013			P27695	Q99717					Q02779			Q99437
P43897			P27469	Q99707					Q02763			Q99250
P43243			P27338	Q99704					Q02750			Q99102
P42766			P27144	Q99700					Q02252			Q99075
P42765			P27105	Q99698					Q02241			Q99062
P42704			P26678	Q99685					Q02224			Q96TC7
P42696			P26440	Q99683					Q02153			Q96TA2
P42694			P26439	Q99678					Q02108			Q96TA0
P42677			P25874	Q99661					Q01974			Q96T83
P42285			P25713	Q99640					Q01973			Q96T55
P41567			P25705	Q99627					Q01814			Q96T54
P41252			P25325	Q99619					Q01813			Q96T53
P41238			P25092	Q99618					Q01780			Q96T52
P41214			P24752	Q99615					Q01740			Q96SY0
P41091			P24539	Q99614					Q01415			Q96SQ9
P40926			P24311	Q99613					Q01196			Q96SN8
P40763			P24310	Q99612					Q00975			Q96SN7
P40429			P23921	Q99611					Q00839			Q96SL1
P40227			P23919	Q99608					Q00796			Q96SK2
P39687			P23786	Q99598					Q00537			Q96SJ8
P39023			P23763	Q99584					Q00536			Q96SE0
P39019			P23443	Q99578					Q00535			Q96SA4
P38935			P23434	Q99576					Q00534			Q96S97
P38919			P23396	Q99570					Q00532			Q96S96
P38646			P23378	Q99567					Q00526			Q96S66
P38432			P23368	Q99558					Q00266			Q96S52
P38398			P23297	Q99549					Q00169			Q96S37
P38159			P22830	Q99547					P98198			Q96S06
P37108			P22736	Q99543					P98196			Q96RV3
P36873			P22695	Q99541					P98194			Q96RT6
P36639			P22570	Q99527					P84095			Q96RQ1
P36578			P22557	Q99523					P84090			Q96RP8
P36542			P22314	Q99497					P84085			Q96RP7
P35659			P22307	Q99490					P84077			Q96RN1
P35637			P22033	Q99489					P81274			Q96RL6
P35611			P21980	Q99471					P80365			Q96RK4
P35580			P21953	Q99469					P80192			Q96RJ3
P35579			P21912	Q99466					P78527			Q96RJ0
P35269			P21810	Q99460					P78508			Q96RI9
P35268			P21796	Q99456					P78371			Q96RI8
P35241			P21554	Q99436					P78368			Q96RI0
P34897			P21399	Q99426					P78363			Q96RD9
P34896			P21397	Q99424					P78362			Q96RD7
P33316			P20674	Q99418					P78356			Q96RD6
P33240			P20132	Q96TA1					P68400			Q96RD3
P32969			P19838	Q96T76					P68371			Q96RD2
P31948			P19793	Q96T68					P68366			Q96RD1
P31943			P19634	Q96T51					P68363			Q96RD0
P31942			P19438	Q96SZ6					P68133			Q96RC9
P31941			P19419	Q96SZ5					P68106			Q96RB7
P31483			P19404	Q96SW2					P68104			Q96RA2
P30876			P19367	Q96SU4					P68036			Q96R84
P30101			P19099	Q96ST8					P68032			Q96R72
P30086			P18859	Q96SN8					P63279			Q96R69
P30050			P18858	Q96SF2					P63267			Q96R67
P29728			P18031	Q96SB4					P63261			Q96R54
P29558			P17931	Q96S95					P63146			Q96R48
P29084			P17735	Q96S82					P63096			Q96R47
P28799			P17655	Q96S59					P63000			Q96R47
P28069			P17568	Q96S44					P62837			Q96R45
P27824			P17540	Q96S15					P62834			Q96R30
P27816			P17302	Q96RU8					P62826			Q96R28
P27797			P17252	Q96RU7					P62820			Q96R27
P27695			P17152	Q96RU3					P62745			Q96R09
P27635			P16435	Q96RU2					P62736			Q96R08
P26651			P16260	Q96RT8					P62491			Q96QZ0
P26639			P16219	Q96RT7					P62333			Q96QV1
P26599			P15954	Q96RS6					P62330			Q96QU1
P26583			P15848	Q96RS0					P62256			Q96QT4
P26447			P15822	Q96RR4					P62253			Q96QS1
P26378			P15538	Q96RQ3					P62195			Q96QK8
P26373			P15336	Q96RM1					P62191			Q96QI5
P26368			P15153	Q96RL7					P62070			Q96QE4
P26367			P15104	Q96RK4					P61604			Q96QE2
P26358			P15056	Q96RG2					P61587			Q96QD8
P26196			P14927	Q96R06					P61586			Q96QA5
P26038			P14920	Q96R05					P61225			Q96Q91
P25786			P14854	Q96QZ7					P61224			Q96Q80
P25705			P14735	Q96QU8					P61221			Q96Q45
P25490			P14635	Q96QP1					P61204			Q96Q04
P25398			P14618	Q96QK1					P61163			Q96PZ7
P24928			P14555	Q96QG7					P61160			Q96PX8
P23588			P14406	Q96QF0					P61158			Q96PS8
P23396			P14373	Q96QB1					P61106			Q96PS6
P23284			P14317	Q96QA5					P61088			Q96PR1
P23246			P14060	Q96Q89					P61086			Q96PQ1
P22830			P13995	Q96Q83					P61081			Q96PQ0
P22626			P13804	Q96Q42					P61077			Q96PL5
P22314			P13196	Q96Q40					P61026			Q96PJ5
P22090			P13073	Q96Q27					P61020			Q96PH1
P22087			P13051	Q96Q15					P61019			Q96PG2
P21399			P12931	Q96Q11					P61018			Q96PG1
P21333			P12694	Q96Q06					P61011			Q96PE5
P21291			P12532	Q96Q05					P61006			Q96PE1
P21128			P12277	Q96PY6					P60953			Q96PD7
P21127			P12236	Q96PY5					P60891			Q96PD6
P20839			P12235	Q96PX9					P60842			Q96PD2
P20810			P12081	Q96PV0					P60763			Q96PC5
P20290			P12074	Q96PU5					P60709			Q96PB8
P20073			P11766	Q96PQ7					P60604			Q96PB7
P20042			P11586	Q96PQ0					P59190			Q96PB1
P19544			P11532	Q96PP9					P59047			Q96P88
P19525			P11498	Q96PN7					P59046			Q96P69
P19474			P11310	Q96PN6					P59045			Q96P68
P19338			P11233	Q96PM9					P59044			Q96P67
P18621			P11182	Q96PM5					P57772			Q96P66
P18615			P11177	Q96PL5					P57735			Q96P65
P18583			P11021	Q96PE3					P57729			Q96P56
P18124			P10912	Q96PE2					P57078			Q96P31
P18077			P10909	Q96PD7					P57059			Q96NY8
P18031			P10809	Q96PC3					P57058			Q96NY7
P17987			P10746	Q96PC2					P56559			Q96NU0
P17947			P10636	Q96P70					P56545			Q96NT5
P17931			P10635	Q96P48					P56373			Q96NR3
P17844			P10620	Q96P44					P56192			Q96NL1
P17509			P10606	Q96P26					P55789			Q96NI6
P17480			P10515	Q96P20					P55263			Q96ND0
P17096			P10415	Q96NW7					P55072			Q96NB2
P16989			P10398	Q96NW4					P55042			Q96N87
P16415			P10176	Q96NU7					P55040			Q96N68
P16403			P10144	Q96NS5					P55039			Q96N66
P16402			P10109	Q96NN9					P55010			Q96N35
P16401			P0DPI2	Q96NL8					P54886			Q96N23
P15924			P0DP25	Q96NL6					P54819			Q96N19
P15880			P0DMV9	Q96NA2					P54764			Q96MZ0
P15559			P0DMV8	Q96N96					P54762			Q96MX0
P15531			P0DKB6	Q96N77					P54760			Q96MV8
P15311			P0DJ07	Q96N76					P54756			Q96MV1
P15170			P0CJ72	Q96N21					P54753			Q96MU8
P14868			P0CG48	Q96N06					P54707			Q96MT1
P14866			P0CG47	Q96MY1					P54652			Q96MS0
P14678			P0C869	Q96MX0					P54646			Q96MM7
P14625			P0C7Q2	Q96MW1					P54619			Q96MH6
P14618			P0C7P4	Q96MT8					P54577			Q96MF2
P14324			P0C7P0	Q96MS3					P54278			Q96MC6
P14314			P0C7M7	Q96MP8					P54277			Q96M98
P13798			P0C0E4	Q96MN2					P54136			Q96M19
P13693			P09912	Q96MI9					P54132			Q96LZ7
P13667			P09874	Q96MH2					P53779			Q96LW7
P13639			P09769	Q96MF2					P53778			Q96LU7
P13010			P09622	Q96ME1					P53671			Q96LT4
P12956			P09601	Q96MC4					P53667			Q96LR9
P12814			P09543	Q96MC2					P53602			Q96LL9
P12270			P09211	Q96MB7					P53597			Q96LL3
P12268			P09001	Q96MA6					P53396			Q96LD1
P11940			P08574	Q96M98					P53384			Q96LC7
P11831			P08559	Q96M96					P53370			Q96LB2
P11388			P08253	Q96M69					P53365			Q96LB1
P11387			P08238	Q96M53					P53355			Q96LB0
P11142			P08133	Q96M32					P53350			Q96LA9
P10809			P07954	Q96M20					P53041			Q96LA6
P10636			P07948	Q96M11					P53004			Q96LA5
P10599			P07919	Q96M02					P52824			Q96L58
P10412			P07900	Q96LZ7					P52790			Q96L42
P10276			P07864	Q96LZ3					P52789			Q96L08
P10265			P07384	Q96LW7					P52732			Q96KV6
P10155			P07203	Q96LT7					P52701			Q96KT7
P0DPA3			P07195	Q96LT4					P52564			Q96KR6
P0DPA2			P07101	Q96LR2					P52429			Q96KR4
P0DMV9			P07098	Q96LM6					P52333			Q96KN9
P0DMV8			P06576	Q96LI6					P52209			Q96KK4
P0DMR1			P06493	Q96LI5					P52198			Q96KK3
P0DJD4			P06401	Q96LD8					P51965			Q96KJ9
P0DJD3			P06241	Q96LD4					P51957			Q96KJ4
P0CG48			P05496	Q96LC9					P51956			Q96KG7
P0CB38			P05181	Q96LB4					P51955			Q96KF7
P0C7T5			P05166	Q96L93					P51858			Q96KC8
P0C7P1			P05165	Q96L92					P51841			Q96KA5
P0C024			P05141	Q96L50					P51828			Q96K78
P09960			P05108	Q96L46					P51817			Q96K49
P09914			P05091	Q96L34					P51813			Q96K37
P09913			P05089	Q96L21					P51812			Q96K19
P09874			P04818	Q96KX2					P51798			Q96K12
P09661			P04181	Q96KR4					P51797			Q96JX3
P09651			P04179	Q96KQ4					P51795			Q96JW4
P09543			P04156	Q96KP6					P51793			Q96JT2
P09429			P04049	Q96KP4					P51790			Q96JQ5
P09382			P04040	Q96KP1					P51668			Q96JQ2
P09234			P03928	Q96KN8					P51617			Q96JQ0
P09132			P03923	Q96KN2					P51608			Q96JP9
P09012			P03915	Q96KG9					P51606			Q96JN2
P09001			P03905	Q96KF2					P51582			Q96JJ7
P08865			P03901	Q96KE9					P51575			Q96JJ6
P08708			P03897	Q96K76					P51570			Q96JJ3
P08670			P03891	Q96K49					P51553			Q96JF0
P08621			P03886	Q96JZ2					P51532			Q96JA4
P08579			P02786	Q96JP0					P51531			Q96JA1
P08240			P02760	Q96JJ3					P51530			Q96J86
P08238			P02511	Q96JI7					P51451			Q96J84
P08195			P01116	Q96JG6					P51398			Q96J66
P07910			P00973	Q96JE7					P51160			Q96J65
P07900			P00966	Q96JD6					P51159			Q96J42
P07814			P00846	Q96JB8					P51157			Q96J01
P07737			P00519	Q96JB5					P51153			Q96IZ2
P07585			P00505	Q96JB2					P51151			Q96IX5
P07355			P00480	Q96JA3					P51149			Q96IW7
P07305			P00441	Q96J92					P51148			Q96IV6
P07237			P00414	Q96J02					P51003			Q96IQ7
P06748			P00403	Q96IZ0					P50991			Q96IK0
P06733			P00395	Q96IY1					P50990			Q96I45
P06730			P00390	Q96IV0					P50750			Q96I36
P05783			P00387	Q96IU4					P50747			Q96HV5
P05455			P00374	Q96IU2					P50613			Q96HS1
P05412			P00367	Q96II8					P50583			Q96HR9
P05388			P00338	Q96IG2					P50570			Q96HP8
P05204			P00167	Q96IF1					P50336			Q96HJ5
P05198			P00156	Q96I76					P50225			Q96HH9
P05141			O96011	Q96I59					P50213			Q96HH6
P04843			O96008	Q96I15					P50148			Q96HH4
P04818			O96000	Q96HU1					P50053			Q96HG1
P04792			O95977	Q96HP0					P49961			Q96HE8
P04439			O95900	Q96HN2					P49916			Q96HD1
P04080			O95886	Q96HD9					P49915			Q96HA9
P04075			O95865	Q96HC4					P49914			Q96HA4
P04003			O95847	Q96HA8					P49903			Q96HA1
P03973			O95831	Q96H79					P49902			Q96H96
P03950			O95822	Q96H55					P49842			Q96H78
P02786			O95674	Q96H35					P49841			Q96H72
P01106			O95573	Q96H22					P49840			Q96H15
P00973			O95571	Q96H20					P49821			Q96GZ6
P00966			O95563	Q96GX9					P49789			Q96GX1
P00505			O95479	Q96GR2					P49773			Q96GR4
P00374			O95389	Q96GN5					P49770			Q96GQ5
O95985			O95363	Q96GG9					P49761			Q96GP6
O95926			O95299	Q96GD4					P49760			Q96GN5
O95900			O95298	Q96GD0					P49759			Q96GM1
O95793			O95258	Q96GA7					P49748			Q96GL9
O95786			O95202	Q96GA3					P49736			Q96GF1
O95777			O95201	Q96G75					P49703			Q96GE4
O95758			O95182	Q96G74					P49674			Q96GC9
O95707			O95178	Q96G61					P49642			Q96G97
O95639			O95169	Q96G04					P49619			Q96G91
O95628			O95168	Q96G03					P49591			Q96G79
O95503			O95167	Q96G01					P49590			Q96G30
O95478			O95153	Q96FZ7					P49589			Q96G27
O95453			O95140	Q96FX2					P49588			Q96G23
O95429			O95139	Q96FW1					P49459			Q96FZ5
O95391			O94925	Q96FS4					P49448			Q96FX8
O95363			O94913	Q96FQ6					P49427			Q96FV3
O95319			O94826	Q96FJ2					P49411			Q96FT7
O95232			O94811	Q96FJ0					P49368			Q96FM1
O95218			O94778	Q96FI4					P49336			Q96FL9
O95163			O94763	Q96FF9					P49326			Q96FL8
O95149			O76095	Q96FA3					P49137			Q96FE7
O95147			O76031	Q96F86					P48741			Q96FE5
O95104			O75964	Q96F44					P48736			Q96FC9
O95071			O75947	Q96F07					P48735			Q96FB5
O95059			O75936	Q96EY7					P48730			Q96F81
O94992			O75896	Q96EY5					P48729			Q96F46
O94913			O75880	Q96EY1					P48723			Q96F25
O94906			O75879	Q96EX3					P48643			Q96F15
O94875			O75874	Q96EQ0					P48637			Q96F05
O94818			O75807	Q96EP5					P48506			Q96EX2
O77932			O75751	Q96EP0					P48426			Q96EX1
O76094			O75746	Q96EN8					P48163			Q96EU7
O76021			O75648	Q96EK6					P48048			Q96ET8
O76003			O75616	Q96EK4					P47989			Q96ES6
O75940			O75600	Q96EH5					P47902			Q96ER9
O75821			O75570	Q96EH3					P47900			Q96EP9
O75818			O75521	Q96EF6					P47897			Q96EP0
O75817			O75489	Q96EF0					P47895			Q96EC8
O75792			O75460	Q96EE3					P46734			Q96E93
O75691			O75439	Q96ED9					P46459			Q96E52
O75683			O75438	Q96EA4					P46199			Q96E22
O75648			O75431	Q96E29					P46100			Q96E16
O75643			O75414	Q96E17					P46063			Q96DZ9
O75616			O75394	Q96E14					P46013			Q96DZ7
O75607			O75390	Q96DZ5					P45985			Q96DX8
O75569			O75385	Q96DX5					P45984			Q96DW6
O75564			O75380	Q96DU9					P45983			Q96DU3
O75554			O75362	Q96DU7					P45954			Q96DS6
O75534			O75324	Q96DR7					P45880			Q96DL1
O75533			O75323	Q96DR4					P45844			Q96DI7
O75526			O75306	Q96DI7					P43686			Q96DD7
O75525			O75251	Q96DH6					P43403			Q96DC7
O75494			O75208	Q96DG6					P43250			Q96DB9
O75475			O75154	Q96DE5					P43246			Q96DA6
O75400			O75153	Q96D71					P42898			Q96D96
O75390			O75146	Q96D53					P42694			Q96D59
O75369			O75143	Q96D09					P42685			Q96D53
O75347			O75131	Q96CW5					P42684			Q96D42
O75319			O75127	Q96CW1					P42681			Q96D31
O75179			O75094	Q96CV9					P42680			Q96D05
O75153			O75052	Q96CT7					P42679			Q96CU9
O75152			O75027	Q96CS2					P42356			Q96CS7
O75150			O60936	Q96CP6					P42345			Q96CQ1
O75132			O60830	Q96CN9					P42338			Q96CP7
O75131			O60829	Q96CN5					P42336			Q96CP6
O75127			O60783	Q96CG3					P42285			Q96CN4
O75116			O60733	Q96CF2					P42025			Q96CH1
O75113			O60543	Q96CD2					P41743			Q96CE8
O60936			O60488	Q96CD0					P41440			Q96CC6
O60930			O60427	Q96CA5					P41279			Q96C03
O60870			O60397	Q96C86					P41252			Q96BZ9
O60869			O60333	Q96C12					P41250			Q96BZ4
O60841			O60313	Q96BY6					P41240			Q96BY9
O60832			O60296	Q96BY2					P41226			Q96BQ1
O60812			O60260	Q96BU1					P41091			Q96BM0
O60783			O60239	Q96BT7					P40939			Q96BI3
O60763			O60238	Q96BT3					P40937			Q96BI1
O60739			O60220	Q96BS2					P40692			Q96BF3
O60610			O60218	Q96BR1					P40617			Q96BD0
O60583			O43920	Q96BP2					P40616			Q96BA8
O60573			O43900	Q96BN8					P40227			Q96B96
O60563			O43847	Q96BN2					P40145			Q96B77
O60524			O43837	Q96BM1					P38935			Q96B42
O60508			O43823	Q96BH1					P38919			Q96B33
O60506			O43822	Q96BD8					P38646			Q96B21
O60381			O43819	Q96BD6					P38606			Q96B02
O60341			O43808	Q96BA8					P38405			Q96AW1
O60306			O43772	Q96B97					P36915			Q96AQ8
O60287			O43766	Q96B36					P36897			Q96AQ2
O60231			O43716	Q96B26					P36896			Q96AP7
O43896			O43715	Q96AZ1					P36894			Q96AN5
O43865			O43708	Q96AX9					P36888			Q96AM1
O43823			O43678	Q96AT9					P36507			Q96AJ9
O43818			O43677	Q96AQ7					P36406			Q96AG4
O43809			O43676	Q96AQ6					P36405			Q96AG3
O43719			O43674	Q96AP4					P36404			Q96AD5
O43709			O43615	Q96AJ9					P35998			Q96AA3
O43707			O43572	Q96AH0					P35968			Q96A59
O43670			O43542	Q96AE7					P35916			Q96A57
O43592			O43524	Q96AD5					P35790			Q96A54
O43583			O43521	Q96AC1					P35749			Q96A46
O43432			O43502	Q96A72					P35670			Q96A33
O43426			O43488	Q96A70					P35626			Q96A29
O43414			O43464	Q96A65					P35610			Q96A28
O43399			O43427	Q96A61					P35590			Q96A26
O43395			O43304	Q96A58					P35580			Q96A25
O43390			O43292	Q96A56					P35579			Q96A11
O43347			O43272	Q96A49					P35558			Q969Z4
O43310			O43236	Q96A44					P35557			Q969Z3
O43290			O43181	Q96A33					P35270			Q969X5
O43251			O43169	Q96A32					P35251			Q969X2
O43172			O15528	Q96A26					P35250			Q969X1
O43159			O15527	Q96A05					P35249			Q969W9
O43148			O15498	Q96A00					P35228			Q969W8
O43143			O15446	Q969X0					P34947			Q969W1
O42043			O15417	Q969V6					P34932			Q969W0
O15523			O15382	Q969V3					P34931			Q969V5
O15504			O15304	Q969U7					P34925			Q969V3
O15455			O15294	Q969U6					P33993			Q969V1
O15446			O15287	Q969T9					P33992			Q969S6
O15427			O15239	Q969T7					P33991			Q969S0
O15381			O15235	Q969T4					P33981			Q969P0
O15372			O15229	Q969S8					P33897			Q969N4
O15371			O15228	Q969S3					P33527			Q969N2
O15347			O15164	Q969R8					P33402			Q969M3
O15235			O15121	Q969R2					P33316			Q969M2
O15234			O15091	Q969Q6					P33176			Q969M1
O15226			O15079	Q969Q5					P33121			Q969L2
O15213			O14983	Q969Q0					P33076			Q969K7
O15116			O14966	Q969P5					P32456			Q969J5
O15056			O14957	Q969M7					P32455			Q969I6
O15047			O14949	Q969K4					P32298			Q969F8
O15042			O14929	Q969K3					P32189			Q969F0
O15037			O14925	Q969J5					P31937			Q969E2
O14980			O14879	Q969H0					P31751			Q95460
O14979			O14874	Q969G6					P31749			Q93086
O14776			O14862	Q969G5					P31689			Q93084
O14746			O14832	Q969F9					P31513			Q93063
O14717			O14786	Q93100					P31512			Q93050
O14647			O14746	Q93099					P31327			Q93038
O14602			O14561	Q93088					P31323			Q93033
O14562			O14558	Q93086					P31321			Q92982
O14543			O14548	Q93079					P31153			Q92968
O00584			O14545	Q93062					P31152			Q92959
O00571			O14521	Q93052					P31040			Q92956
O00567			O00763	Q93050					P30837			Q92953
O00566			O00746	Q93045					P30793			Q92952
O00541			O00743	Q93038					P30679			Q92935
O00442			O00584	Q93034					P30613			Q92932
O00425			O00560	Q93015					P30530			Q92911
O00422			O00483	Q93009					P30520			Q92903
O00411			O00429	Q93008					P30291			Q92896
O00410			O00411	Q92997					P30086			Q92887
O00267			O00408	Q92995					P30085			Q92859
O00257			O00330	Q92993					P30049			Q92854
O00178			O00299	Q92989					P29992			Q92847
O00148			O00264	Q92985					P29973			Q92843
K7PPA8			O00217	Q92974					P29728			Q92839
K7EJE8			O00212	Q92973					P29597			Q92838
F1D8N4			O00203	Q92968					P29475			Q92832
C9JE40			O00198	Q92945					P29474			Q92824
B7ZW38			O00167	Q92934					P29376			Q92823
B5ME19			O00165	Q92913					P29323			Q92819
B2RXH8			O00161	Q92905					P29322			Q92813
A9UHW6			O00154	Q92902					P29320			Q92806
A8MWD9			O00144	Q92901					P29317			Q92802
A8MPP1			O00142	Q92900					P28845			Q92796
A7MD48			O00141	Q92890					P28482			Q92781
A6PVI3			O00116	Q92888					P28370			Q92769
A6NP61			L7RXH5	Q92871					P28340			Q92736
A6NNA2			L7RTI5	Q92851					P28330			Q92729
A6NMX2			L0R8F8	Q92845					P28288			Q92692
A6NMK7			K7PPA8	Q92844					P27987			Q92685
A6NHQ2			K7EJE8	Q92843					P27815			Q92673
A6NGQ2			F8W9V1	Q92841					P27708			Q92667
A6NFN3			F1D8N4	Q92837					P27707			Q92643
A6NEQ0			E9PQ53	Q92835					P27448			Q92637
A6NDY0			E0CX11	Q92831					P27338			Q92633
A6NDE4			C9JRZ8	Q92817					P27144			Q92630
A6NC97			B7ZC32	Q92805					P27037			Q92629
A6NC42			A8MWL7	Q92797					P26640			Q92617
A5YKK6			A8MV81	Q92796					P26639			Q92611
A4D1E9			A8MUP2	Q92794					P26440			Q92604
A2RUC4			A8MTT3	Q92793					P26358			Q92581
A2A288			A8K5M9	Q92786					P26196			Q92574
A1L020			A6NK58	Q92785					P25874			Q92562
A0AV96			A6NK06	Q92783					P25705			Q92545
A0A3B3IU46			A6NJ78	Q92764					P25205			Q92544
A0A3B3IRV3			A6NFY7	Q92754					P25098			Q92542
A0A384MDY0			A6NDV4	Q92748					P25092			Q92538
A0A2R8Y4L2			A4D1E9	Q92747					P24941			Q92537
A0A0U1RQF0			A3KMH1	Q92743					P24752			Q92536
A0A0J9YY54			A2RU49	Q92738					P24723			Q92535
A0A0J9YWL9			A2AJT9	Q92734					P23921			Q92523
A0A024RC42			A1XBS5	Q92730					P23919			Q92521
A0A024RBG1			A1L188	Q92696					P23743			Q92508
A0A024R658			A1A4Y4	Q92686					P23677			Q92504
A0A024R611			A0PJW6	Q92674					P23458			Q92482
			A0N0X8	Q92667					P23443			Q92478
			A0A6I8PU40	Q92636					P23381			Q92187
			A0A2Z4LIS9	Q92630					P23368			Q92186
			A0A218KGR2	Q92625					P23258			Q92185
			A0A0U1RRN3	Q92622					P22694			Q8WZA6
			A0A0U1RQE8	Q92621					P22612			Q8WZA1
			A0A0S2Z4C6	Q92619					P22607			Q8WZ94
			A0A0S2Z3C5	Q92616					P22455			Q8WZ92
			A0A0S2Z391	Q92615					P22413			Q8WZ84
			A0A0C5B5G6	Q92609					P22392			Q8WZ75
			A0A0B4J2F0	Q92608					P22314			Q8WZ71
			A0A0B4J2D5	Q92600					P22307			Q8WZ59
			A0A096LP55	Q92598					P22234			Q8WZ55
			A0A087X1C5	Q92597					P22102			Q8WYQ3
			A0A024RD15	Q92575					P21980			Q8WYL5
			A0A024RAB4	Q92574					P21860			Q8WYK1
			A0A024R7J0	Q92569					P21817			Q8WY98
			A0A024R6A3	Q92560					P21810			Q8WY22
			A0A024R328	Q92558					P21802			Q8WY21
			A0A024QZQ1	Q92556					P21709			Q8WY07
				Q92551					P21695			Q8WXS5
				Q92546					P21675			Q8WXS4
				Q92540					P21589			Q8WXI8
				Q92539					P21439			Q8WXI7
				Q92538					P21281			Q8WXH4
				Q92530					P21127			Q8WXH2
				Q92529					P21108			Q8WXH0
				Q92526					P20839			Q8WXG9
				Q92503					P20794			Q8WXG6
				Q92499					P20648			Q8WXF7
				Q8WZA2					P20594			Q8WXD0
				Q8WZ73					P20592			Q8WXA8
				Q8WZ42					P20591			Q8WWZ7
				Q8WZ19					P20585			Q8WWZ4
				Q8WYR4					P20340			Q8WWX8
				Q8WYR1					P20339			Q8WWV6
				Q8WYQ5					P20338			Q8WWU5
				Q8WYP5					P20337			Q8WWT9
				Q8WYP3					P20336			Q8WWQ8
				Q8WYK0					P19784			Q8WWP7
				Q8WYA6					P19525			Q8WWM7
				Q8WY91					P19447			Q8WWI5
				Q8WY64					P19367			Q8WWI1
				Q8WXX0					P19087			Q8WWG9
				Q8WXU2					P19086			Q8WWG1
				Q8WXS3					P18858			Q8WWF5
				Q8WXK4					P18545			Q8WWF3
				Q8WXK3					P18405			Q8WWB7
				Q8WXK1					P18085			Q8WWA1
				Q8WXJ9					P18074			Q8WW62
				Q8WXI4					P17987			Q8WW52
				Q8WXI3					P17980			Q8WW43
				Q8WXH4					P17948			Q8WW34
				Q8WXG6					P17858			Q8WVZ7
				Q8WXE9					P17844			Q8WVZ1
				Q8WXD5					P17812			Q8WVX9
				Q8WXC3					P17600			Q8WVX3
				Q8WXB1					P17540			Q8WVV5
				Q8WX93					P17252			Q8WVQ1
				Q8WWZ3					P17081			Q8WVP7
				Q8WWX0					P17066			Q8WVN6
				Q8WWQ8					P16615			Q8WVM8
				Q8WWM9					P16591			Q8WVI0
				Q8WWM7					P16452			Q8WVE7
				Q8WWL2					P16442			Q8WVE6
				Q8WWI5					P16435			Q8WV83
				Q8WWI1					P16234			Q8WV48
				Q8WWH5					P16219			Q8WV19
				Q8WWB7					P16118			Q8WV15
				Q8WW22					P16083			Q8WUY8
				Q8WVZ9					P16066			Q8WUY3
				Q8WVT3					P15735			Q8WUX1
				Q8WVN8					P15531			Q8WUU8
				Q8WVM8					P15428			Q8WUT9
				Q8WVM7					P15313			Q8WUT4
				Q8WVK7					P15170			Q8WUS8
				Q8WVJ2					P15153			Q8WUM9
				Q8WVH0					P15104			Q8WUH6
				Q8WVE0					P15056			Q8WUG5
				Q8WVB6					P14920			Q8WUD6
				Q8WV41					P14868			Q8WU67
				Q8WV37					P14735			Q8WU20
				Q8WV28					P14625			Q8WU17
				Q8WV24					P14618			Q8WTX9
				Q8WUY3					P14616			Q8WTV0
				Q8WUX9					P14061			Q8WTT0
				Q8WUX2					P13861			Q8WTR4
				Q8WUW1					P13804			Q8TF71
				Q8WUQ7					P13639			Q8TF66
				Q8WUP2					P13637			Q8TF62
				Q8WUM4					P13569			Q8TF08
				Q8WUM0					P13535			Q8TEZ7
				Q8WUJ0					P13533			Q8TEY5
				Q8WUI4					P13010			Q8TEQ8
				Q8WUF5					P12956			Q8TEM1
				Q8WUA2					P12931			Q8TEF2
				Q8WU90					P12883			Q8TED4
				Q8WU79					P12882			Q8TED1
				Q8WU20					P12532			Q8TEB9
				Q8WTX7					P12277			Q8TEB7
				Q8WTS1					P12268			Q8TE99
				Q8TF74					P12081			Q8TE54
				Q8TF61					P11908			Q8TE23
				Q8TF46					P11802			Q8TDY8
				Q8TF44					P11801			Q8TDX9
				Q8TF40					P11586			Q8TDX6
				Q8TF30					P11498			Q8TDW7
				Q8TF01					P11488			Q8TDW4
				Q8TEY7					P11413			Q8TDW0
				Q8TEW6					P11388			Q8TDV5
				Q8TEW0					P11387			Q8TDV2
				Q8TEU7					P11362			Q8TDV0
				Q8TES7					P11310			Q8TDU9
				Q8TER5					P11309			Q8TDU6
				Q8TEQ6					P11274			Q8TDU5
				Q8TEP8					P11234			Q8TDT2
				Q8TEH3					P11233			Q8TDS7
				Q8TED9					P11217			Q8TDS5
				Q8TEB7					P11142			Q8TDS4
				Q8TEA1					P11055			Q8TDQ1
				Q8TE68					P11021			Q8TDQ0
				Q8TE49					P10809			Q8TDN7
				Q8TE04					P10721			Q8TDN2
				Q8TE02					P10644			Q8TDN1
				Q8TDZ2					P10398			Q8TDI8
				Q8TDY4					P10301			Q8TDI7
				Q8TDY2					P10114			Q8TDF5
				Q8TDX5					P0DPH8			Q8TDD5
				Q8TDR2					P0DPH7			Q8TDB8
				Q8TDQ7					P0DMV9			Q8TDB4
				Q8TDN4					P0DMV8			Q8TD84
				Q8TDI0					P0DJR0			Q8TD46
				Q8TDF6					P0C7P3			Q8TD43
				Q8TDB6					P0C7M7			Q8TD22
				Q8TD47					P0C264			Q8TD20
				Q8TD43					P0C263			Q8TD07
				Q8TD31					P0C1S8			Q8TCZ2
				Q8TD19					P0C0E4			Q8TCY5
				Q8TD16					P09884			Q8TCW9
				Q8TCY9					P09874			Q8TCW7
				Q8TCX5					P09769			Q8TCU5
				Q8TCX1					P09622			Q8TCU3
				Q8TCU6					P09619			Q8TCT9
				Q8TCU4					P09543			Q8TCT8
				Q8TCT1					P09471			Q8TCT7
				Q8TCS8					P09467			Q8TCT6
				Q8TCG2					P09417			Q8TCT0
				Q8TCG1					P08922			Q8TCQ1
				Q8TCD5					P08754			Q8TCP9
				Q8TC84					P08631			Q8TCJ2
				Q8TC76					P08581			Q8TCG5
				Q8TC41					P08319			Q8TCG1
				Q8TC05					P08243			Q8TCC7
				Q8TBZ6					P08240			Q8TCB6
				Q8TBZ0					P08238			Q8TC57
				Q8TBX8					P08237			Q8TC41
				Q8TBP0					P08183			Q8TC36
				Q8TBN0					P08134			Q8TC27
				Q8TBK2					P08133			Q8TC26
				Q8TBF4					P08069			Q8TC12
				Q8TBF2					P07949			Q8TBR7
				Q8TBE9					P07948			Q8TBQ9
				Q8TBC4					P07947			Q8TBP6
				Q8TBB6					P07900			Q8TBP5
				Q8TB92					P07814			Q8TBM8
				Q8TB72					P07741			Q8TBM7
				Q8TB68					P07737			Q8TBJ4
				Q8TB52					P07498			Q8TBG9
				Q8TB36					P07437			Q8TBF5
				Q8TB24					P07333			Q8TBE7
				Q8TAX0					P07332			Q8TBE3
				Q8TAT6					P07205			Q8TBE1
				Q8TAP6					P07195			Q8TBB6
				Q8TAM2					P07108			Q8TBA6
				Q8TAG9					P06737			Q8TB96
				Q8TAF3					P06732			Q8TB68
				Q8TAD8					P06576			Q8TB61
				Q8TAC2					P06493			Q8TB36
				Q8TAA3					P06241			Q8TAZ6
				Q8NI77					P06239			Q8TAX9
				Q8NI51					P06213			Q8TAV4
				Q8NI35					P05771			Q8TAQ9
				Q8NI29					P05408			Q8TAG5
				Q8NHZ8					P05166			Q8TAF8
				Q8NHY2					P05165			Q8TAE7
				Q8NHX9					P05129			Q8TAD4
				Q8NHW5					P05091			Q8TAC9
				Q8NHV9					P05023			Q8TAB3
				Q8NHV4					P04899			Q8TAA9
				Q8NHS2					P04839			Q8NI60
				Q8NHS0					P04629			Q8NI28
				Q8NHQ9					P04626			Q8NI17
				Q8NHQ1					P04406			Q8NHY0
				Q8NHP1					P04350			Q8NHX9
				Q8NHH1					P04183			Q8NHV5
				Q8NHG8					P04049			Q8NHU3
				Q8NGW1					P04040			Q8NHU2
				Q8NG50					P04035			Q8NHS3
				Q8NG31					P01116			Q8NHS1
				Q8NG08					P01112			Q8NHP6
				Q8NG06					P01111			Q8NHL6
				Q8NFZ5					P00973			Q8NHK3
				Q8NFY9					P00966			Q8NHK3
				Q8NFU3					P00568			Q8NHK3
				Q8NFT2					P00558			Q8NHJ6
				Q8NFP9					P00540			Q8NHH9
				Q8NFP7					P00533			Q8NHE4
				Q8NFJ9					P00519			Q8NHC8
				Q8NFI3					P00492			Q8NHC7
				Q8NFH8					P00390			Q8NHC6
				Q8NFH5					P00387			Q8NHC5
				Q8NFH4					P00374			Q8NHC4
				Q8NFH3					P00367			Q8NHB8
				Q8NFG4					P00352			Q8NHB7
				Q8NFF5					O96017			Q8NHB1
				Q8NFD5					O96013			Q8NHA8
				Q8NFA0					O96007			Q8NHA6
				Q8NF99					O95983			Q8NHA4
				Q8NF50					O95922			Q8NH95
				Q8NEZ5					O95837			Q8NH94
				Q8NEZ2					O95835			Q8NH93
				Q8NEY8					O95831			Q8NH92
				Q8NEY4					O95825			Q8NH90
				Q8NEV9					O95819			Q8NH89
				Q8NEV1					O95817			Q8NH87
				Q8NER1					O95816			Q8NH85
				Q8NEP3					O95786			Q8NH83
				Q8NEM8					O95757			Q8NH81
				Q8NEL9					O95755			Q8NH80
				Q8NEG7					O95747			Q8NH79
				Q8NEE6					O95716			Q8NH76
				Q8NEB9					O95661			Q8NH74
				Q8NE71					O95622			Q8NH73
				Q8NE35					O95620			Q8NH72
				Q8NE09					O95573			Q8NH70
				Q8NDV7					O95544			Q8NH69
				Q8NDV3					O95479			Q8NH67
				Q8NDQ6					O95477			Q8NH64
				Q8NDL9					O95467			Q8NH63
				Q8NDI1					O95429			Q8NH61
				Q8NDF8					O95398			Q8NH60
				Q8ND90					O95396			Q8NH59
				Q8ND71					O95382			Q8NH57
				Q8ND56					O95363			Q8NH56
				Q8ND30					O95347			Q8NH55
				Q8ND25					O95342			Q8NH54
				Q8ND04					O95340			Q8NH53
				Q8NCR6					O95255			Q8NH51
				Q8NCR3					O95239			Q8NH50
				Q8NCQ5					O95235			Q8NH49
				Q8NCN4					O95140			Q8NH48
				Q8NCE2					O95057			Q8NH43
				Q8NCE0					O94955			Q8NH42
				Q8NCD3					O94921			Q8NH41
				Q8NC96					O94911			Q8NH40
				Q8NC69					O94851			Q8NH37
				Q8NC51					O94844			Q8NH21
				Q8NBU5					O94832			Q8NH19
				Q8NBT2					O94823			Q8NH18
				Q8NBQ7					O94806			Q8NH16
				Q8NBQ5					O94804			Q8NH10
				Q8NBN3					O94768			Q8NH09
				Q8NBF2					O94762			Q8NH08
				Q8NB16					O94761			Q8NH07
				Q8NB14					O77932			Q8NH06
				Q8NAP1					O76082			Q8NH05
				Q8NAG6					O76074			Q8NH04
				Q8NAA4					O76062			Q8NH03
				Q8NA72					O76039			Q8NH02
				Q8N9V7					O76031			Q8NH01
				Q8N9N8					O75962			Q8NH00
				Q8N9L9					O75943			Q8NGZ9
				Q8N9B8					O75914			Q8NGZ6
				Q8N9A8					O75912			Q8NGZ5
				Q8N987					O75911			Q8NGZ4
				Q8N8S7					O75908			Q8NGZ3
				Q8N8R7					O75879			Q8NGZ2
				Q8N884					O75874			Q8NGZ0
				Q8N841					O75828			Q8NGY9
				Q8N819					O75771			Q8NGY7
				Q8N7B1					O75747			Q8NGY6
				Q8N7A1					O75716			Q8NGY5
				Q8N752					O75695			Q8NGY3
				Q8N726					O75676			Q8NGY2
				Q8N6T3					O75648			Q8NGY1
				Q8N6R0					O75643			Q8NGY0
				Q8N6M6					O75628			Q8NGX9
				Q8N6H7					O75616			Q8NGX8
				Q8N668					O75582			Q8NGX6
				Q8N612					O75575			Q8NGX5
				Q8N5Y8					O75521			Q8NGX3
				Q8N5X7					O75460			Q8NGX2
				Q8N5V2					O75417			Q8NGX1
				Q8N5S9					O75414			Q8NGX0
				Q8N5N7					O75385			Q8NGW6
				Q8N5M1					O75356			Q8NGW1
				Q8N5H7					O75355			Q8NGV7
				Q8N5F7					O75354			Q8NGV6
				Q8N5D0					O75351			Q8NGV5
				Q8N5C8					O75343			Q8NGV0
				Q8N556					O75306			Q8NGU9
				Q8N543					O75191			Q8NGU4
				Q8N4X5					O75185			Q8NGU2
				Q8N4N8					O75116			Q8NGU1
				Q8N4J0					O75110			Q8NGT9
				Q8N4C8					O75063			Q8NGT9
				Q8N4B1					O75037			Q8NGT7
				Q8N490					O75027			Q8NGT5
				Q8N474					O60942			Q8NGT2
				Q8N461					O60884			Q8NGT1
				Q8N427					O60841			Q8NGT0
				Q8N3Z6					O60825			Q8NGS9
				Q8N3Y1					O60774			Q8NGS8
				Q8N3V7					O60741			Q8NGS7
				Q8N3U4					O60706			Q8NGS6
				Q8N3K9					O60701			Q8NGS5
				Q8N3J2					O60674			Q8NGS4
				Q8N3I7					O60673			Q8NGS3
				Q8N3E9					O60566			Q8NGS2
				Q8N3C0					O60547			Q8NGS1
				Q8N392					O60503			Q8NGS0
				Q8N386					O60488			Q8NGR9
				Q8N371					O60469			Q8NGR8
				Q8N357					O60423			Q8NGR6
				Q8N335					O60361			Q8NGR5
[truncated: 3,767 more rows]
